# Supplementary material
Source: HighWire-hosted journal article supplement (doi:10.1101/rna.079416.122)
Supplement: Supplemental_Legends.docx [file Supplemental_Legends.docx]

**SUPPLEMENTAL FIGURE LEGENDS**

**Supplemental Figure S1.** **Electron micrographs of RNase I-digested 80S ribosomes.** Representative micrographs of negatively stained 80S ribosomes from *FLAG-UPF1* (prepared with or without cycloheximide), and *UPF1-FLAG*, *upf1DE572AA-FLAG*, and *UPF1-FLAG/upf2Δ* (prepared with cycloheximide) were captured at 87,000X magnification. Scale bar of 200nm is shown.

**Supplemental Figure S2. Polysomal distributions of wild-type and mutant forms of Upf1.** Top, Representative polysome trace from a *upf1Δ* strain containing centromerically expressed *UPF1-FLAG* across a 7-47% (right to left) sucrose gradient. Middle, comparison of Upf1 polysomal distribution between centromeric (light blue) and episomal (dark blue) *UPF1-FLAG*. Western blots were probed with α-FLAG antibody and the mean percent total Upf1-FLAG signal per fraction across sucrose gradient fractions 1-10 from three replicate experiments was calculated and plotted with standard error of the mean. Bottom, representative western blots of centromeric *UPF1-FLAG* and episomal *UPF1-FLAG*, *upf1DE572AA-FLAG* and *UPF1-FLAG* in a *upf2Δ* strain background. Blots were probed with α-FLAG antibody. Arrow denotes migration of Upf1 protein.

**Supplemental Figure S3.** **NMD phenotypes of *UPF1* mutants.** Top, Northern blots of mRNA isolated from two replicates of WT or *upf1Δ* cells containing an empty vector (EV) or from *upf1Δ* cells expressing *UPF1-FLAG* or its mutant alleles from centromeric (top panel) or episomal vectors (bottom panel). Blots probed for *CYH2* mRNA and pre-mRNA and for *SCR1* as a loading control. Bottom, Ratio of *CYH2* pre-mRNA:mRNA for the strains depicted in the top panels, mean and range. WT EV, wild-type *UPF1* strain containing empty vector; *upf1Δ* EV, *upf1Δ* strain containing empty vector.

**Supplemental Figure S4. NMD substrates were stabilized in episomally expressed FLAG-tagged *UPF1* strains.** Differential expression analysis was performed by DESeq2 to determine changes in total mRNA abundance between each FLAG-tagged *UPF1* strain and its isogenic WT + EV (empty vector) for each CHX condition. Analyzed differential expression data from three replicates each of *upf1Δ* vs WT, *upf2Δ* vs WT, and *upf3Δ* vs WT strains were obtained from Celik et al., 2017. Mean of normalized counts were plotted against log2 fold change between the strain of interest and its associated WT, with grey dashed line at log2 fold change of zero to indicate no change. The plot’s y-axis is limited to -10 and 10 for better visualization. Data points with log2 fold change higher than 10 were plotted at 10 as triangles, and data points with log2 fold change lower than -10 were plotted at -10 as inverted triangles. Only NMD substrates that showed significant changes (FDR-adjusted p-value < 0.01) between the two strains were shown. The number of significantly differentially expressed NMD substrates on each plot is provided.

**Supplemental Figure S5. Stoichiometric recovery of FLAG-tagged Upf1 with ribosomal proteins.** Average normalized iBAQ values, quantified from mass spectrometry data, of 100 most abundant proteins (in descending order) in each sample. Red arrow denotes Upf1 protein.

**Supplemental Figure S6. Immunopurification of ribosomes associated with FLAG-tagged Upf1.** Representative western blot of aliquots of total and immunopurified ribosomes (IP) derived from strains expressing episomal *UPF1-FLAG* or *6XHis-Upf1*. Ribosomes were immunopurified with α-FLAG resin. Equal amounts of input ribosomes (by A260) and equal % recovered material (as a fraction of final volume) were loaded into the respective lanes. Blot was probed with α-FLAG and α-Rps6 antibody. All panels are from the same blot.

**Supplemental Figure S7. Abundance of ribosome footprints relative to canonical start or stop codons for immunopurified (IP) or total ribosomes (total) A.** WT+EV and *FLAG-UPF1* strains treated or untreated with CHX**. B.** WT+EV, *UPF1-FLAG*, *UPF1-FLAG*/*upf2Δ*, and *upf1DE572AA-FLAG* strains treated with CHX.For each footprint size, the number of footprint P-sites at each nucleotide position relative to start or stop codon of an mRNA is normalized to the total number of footprints of that size in the library and converted to percentage. The percentage of footprint counts in the first and last 100 nt of mRNAs were plotted. mRNAs whose coding region is less than 200 nt in length were disregarded from the plot to avoid repeated counting. Vertical grey solid lines signify the first nucleotide of the start and stop codons. Vertical grey dashed lines occur every 3 nucleotides to indicate reads in-frame with the start codon.

**Supplemental Figure S8. Upf1 progressively associates with ribosomes across mRNA coding regions except when Upf1 association forms L footprints.** **A**-**C**. Distribution of footprint abundance across the coding region (CDS) for each footprint size class from total (purple) or IP (orange) ribosomes profiling libraries. Each transcript’s CDS was divided into 4 bins and the percentage of footprints’ P-sites belonging to each bin in for each transcript was calculated and plotted. Grey dashed line signifies a theoretical number where each bin of CDS contains an equivalent number of footprints for a sum of 100% across all 4 bins. **D**-**F**. Difference between footprint abundance in IP and that in Total ribosomes for each footprint size and bin (calculated in part **A-C**). **A** and **D.** Data from strains expressing WT+EV and *FLAG-UPF1* untreated with CHX. **B** and **E.** Data from strains expressing WT+EV and *FLAG-UPF1* treated with CHX. **C** and **F.** Data from strains expressing WT+EV, *UPF1-FLAG*, *UPF1-FLAG*/*upf2Δ*, and *upf1DE572AA-FLAG* treated with CHX*.*

**Supplemental Figure S9. The relationship between codon optimality and ribosome occupancy at a codon is disrupted in the presence of cycloheximide.** Spearman’s rank correlation was computed of mean relative occupancy at 61 sense codons with their associated inverse of tRNA adaptation index (1/tAI). Positive correlation indicates the expected translation dynamic where the ribosomes spend longer time translating non-optimal codons and less time translating optimal codons.

**Supplemental Figure S10. Fractions of footprints in ribosome profiling libraries in particular mRNA regions or reading frames. A-B.** Fractions of footprints in mRNA regions (5’-UTR, coding, 3’-UTR) in which ribosome footprint P-sites are located for each library. P-site location of each read was determined by testing whether its coordinate was located before the coordinate of the first nucleotide of the start codon (5’-UTR region), after the coordinate of the last nucleotide of the penultimate codon (3’-UTR region), or at or in between the two mentioned coordinates (coding region, CDS). The number of P-sites in each of the 3 regions was tabulated and normalized to the total number of footprints in the library. **C-D.** Fractions of ribosome footprints in each of the three reading frames within different mRNA regions (5’-UTR, CDS, 3’-UTR).The reading frame of each footprint was calculated by dividing its coordinate relative to the first nucleotide of the start codon then recording the remainder. Thus, reading frame “0” refers to translation that is in-frame with the start codon. The number of footprints in each reading frame in a particular mRNA region was tabulated and normalized to the total number of footprints in that mRNA region.

**Supplemental Figure S11. Reproducibility between replicates of ribosome profiling libraries. A.** Correlation matrices showing pairwise Pearson’s correlation (*r*) of transcript abundance (log10-transformed, non-zero RPKM values) between total and IP ribosome profiling libraries. **B.** Principal Component Analyses (PCA) on the main footprint abundance (S and M for -CHX libraries; M for +CHX libraries) show abundance variation across multiple libraries. Libraries with smaller distance to one another are more similar than ones that are further apart. Biological replicates tend to cluster together. Variation in transcript abundance between samples are mostly explained by whether Upf1-associated ribosomes were selectively recovered, as IP and Total libraries are segregated along the x-axis.

**Supplemental Figure S12. Reproducibility between replicates of RNA-Seq libraries. A.** Correlation matrix showing pairwise Pearson’s correlation (*r*) of transcript abundance (log10-transformed, non-zero RPKM values) between RNA-Seq libraries. **B.** Principal Component Analysis (PCA) on reads abundance shows variation across multiple libraries. Libraries with smaller distance to one another are more similar than ones that are further apart. Biological replicates tend to cluster together. Variations in gene expression between strains are mostly explained by the difference in library preparation methods between N- and C-terminal FLAG-tagged strains (sample segregation along the x-axis).

**SUPPLEMENTAL MATERIAL**

**Supplemental_Fig_S1.pdf** Electron micrographs of RNase I-digested 80S ribosomes

**Supplemental_Fig_S2.pdf** Polysomal distributions of wild-type and mutant forms of Upf1

**Supplemental_Fig_S3.pdf** NMD phenotypes of *UPF1* mutants

**Supplemental_Fig_S4.pdf** NMD substrates were stabilized in episomally expressed FLAG-tagged *UPF1* strains

**Supplemental_Fig_S5.pdf** Stoichiometric recovery of FLAG-tagged Upf1 with ribosomal proteins.

**Supplemental_Fig_S6.pdf** Immunopurification of ribosomes associated with FLAG-tagged Upf1

**Supplemental_Fig_S7.pdf** Abundance of ribosome footprints relative to canonical start or stop codons for immunopurified or total ribosomes

**Supplemental_Fig_S8.pdf** Upf1 progressively associates with ribosomes across mRNA coding regions except when Upf1 association forms L footprints

**Supplemental_Fig_S9.pdf** The relationship between codon optimality and ribosome occupancy at a codon is disrupted in the presence of cycloheximide

**Supplemental_Fig_S10.pdf** Fractions of footprints in ribosome profiling libraries in particular mRNA regions or reading frames

**Supplemental_Fig_S11.pdf** Reproducibility between replicates of ribosome profiling libraries

**Supplemental_Fig_S12.pdf** Reproducibility between replicates of RNA-Seq libraries

**Supplemental_Table_S1.xlsx** Sequencing statistics

**Supplemental_Table_S2.xlsx** Mass_spec_filtered_normalized_iBAQs

**Supplemental_Table_S3.xlsx** Mass_spec_limma_abundance_changes

**Supplemental_Table_S4.xlsx** L vs M abundance

**Supplemental_Table_S5.xlsx** Strains

**Supplemental_Table_S6.xlsx** Oligonucleotides

**Supplemental_Table_S7.xlsx** Plasmids

**Supplemental_Table_S8.xlsx** Mass spectrometry FLAG-Upf1

**Supplemental_Table_S9.xlsx** Mass spectrometry C-terminal data

**Supplemental_Table_S10.xlsx** Mass spectrometry 6XHis-Upf1 data

**Supplemental_Table_S11.xlsx** Mass spectrometry FLAG-Upf1 Upf2-Upf3 EE data

**Supplemental_Table_S12.xlsx** P-site offsets
