# Supplementary material
Source: HighWire-hosted journal article supplement (doi:10.1101/rna.079416.122)
Supplement: Supplemental_Table_S2.xlsx [file Supplemental_Table_S2.xlsx]

## Sheet: FLAG-UPF1 (-CHX)
Detection	Protein	Total_1	Total_2	IP_1	IP_2
IP_exclusive	SPT15	NA	NA	7114500	5732400
IP_exclusive	NPA3	NA	NA	6153600	952830
Total_exclusive	RPS2	1216300000	1335000000	NA	NA
Total_exclusive	YDJ1	174200000	178110000	NA	NA
Total_exclusive	MDN1	1628500	1110500	NA	NA
Total_exclusive	ACC1	3670100	3161500	NA	NA
Total_exclusive	RPL43B	331650000	342880000	NA	NA
Total_exclusive	NOP56	54908000	51444000	NA	NA
Total_exclusive	RPS21B	663770000	454100000	NA	NA
Total_exclusive	STM1	471390000	565600000	NA	NA
Total_exclusive	RRP12	8715500	8733200	NA	NA
Total_exclusive	RRP5	3597700	4460600	NA	NA
Total_exclusive	ERB1	25853000	28778000	NA	NA
Total_exclusive	RPL15A	2199900000	2168200000	NA	NA
Total_exclusive	CBF5	51317000	54738000	NA	NA
Total_exclusive	RPL13B	1086400000	1634900000	NA	NA
Total_exclusive	ARX1	38230000	31729000	NA	NA
Total_exclusive	UTP20	2101200	2046000	NA	NA
Total_exclusive	NOP7	35699000	34172000	NA	NA
Total_exclusive	MAK21	9684600	11811000	NA	NA
Total_exclusive	CLU1	5106400	3252300	NA	NA
Total_exclusive	GUS1	6758100	9045400	NA	NA
Total_exclusive	NIP1	11156000	9321000	NA	NA
Total_exclusive	OLA1	37456000	33281000	NA	NA
Total_exclusive	HAS1	27539000	22272000	NA	NA
Total_exclusive	NMD3	38739000	42146000	NA	NA
Total_exclusive	UTP22	4110800	4630100	NA	NA
Total_exclusive	HYP2	297060000	330730000	NA	NA
Total_exclusive	COP1	3698500	2962900	NA	NA
Total_exclusive	TOP2	2863200	3827800	NA	NA
Total_exclusive	NAN1	5057800	7575600	NA	NA
Total_exclusive	KRE33	4904000	4765900	NA	NA
Total_exclusive	SRO9	26706000	21853000	NA	NA
Total_exclusive	VPH1	4029600	38435000	NA	NA
Total_exclusive	MSS116	14268000	12854000	NA	NA
Total_exclusive	PSE1	4547600	3553400	NA	NA
Total_exclusive	ARB1	16674000	18024000	NA	NA
Total_exclusive	SCP160	4354800	46007000	NA	NA
Total_exclusive	CIC1	23685000	31496000	NA	NA
Total_exclusive	MIC60	10431000	7062400	NA	NA
Total_exclusive	POL5	5830200	4184200	NA	NA
Total_exclusive	NOC2	12380000	13424000	NA	NA
Total_exclusive	URB1	2014300	1492200	NA	NA
Total_exclusive	FUN12	7054200	8786200	NA	NA
Total_exclusive	FAA1	10086000	6141300	NA	NA
Total_exclusive	GRS1	5386500	7192700	NA	NA
Total_exclusive	PDR5	2370300	5403200	NA	NA
Total_exclusive	TOM70	9001400	9904200	NA	NA
Total_exclusive	POR1	10597000	235240000	NA	NA
Total_exclusive	QCR2	3233700	53681000	NA	NA
Total_exclusive	SPB1	9260200	11917000	NA	NA
Total_exclusive	ALD6	9634500	9424100	NA	NA
Total_exclusive	GCD1	6814800	7442700	NA	NA
Total_exclusive	SEC63	7034500	18644000	NA	NA
Total_exclusive	SEC7	1481400	1532400	NA	NA
Total_exclusive	NOP2	15391000	18861000	NA	NA
Total_exclusive	PAB1	9988500	10775000	NA	NA
Total_exclusive	NMD5	5593200	3264000	NA	NA
Total_exclusive	NOP4	7919400	8269700	NA	NA
Total_exclusive	LPD1	12830000	21934000	NA	NA
Total_exclusive	MPP10	3678500	3217000	NA	NA
Total_exclusive	STT4	1060200	838740	NA	NA
Total_exclusive	CHC1	1982800	1613800	NA	NA
Total_exclusive	RET1	2691900	2872300	NA	NA
Total_exclusive	NEW1	1306000	1486200	NA	NA
Total_exclusive	FPR4	61655000	70409000	NA	NA
Total_exclusive	UTP8	6803300	7024300	NA	NA
Total_exclusive	BMS1	2655700	2601900	NA	NA
Total_exclusive	COR1	1564700	51736000	NA	NA
Total_exclusive	RPA135	2255800	2839400	NA	NA
Total_exclusive	RIX7	5419600	3540800	NA	NA
Total_exclusive	HHF1	392050000	274970000	NA	NA
Total_exclusive	LCB2	9095600	6936300	NA	NA
Total_exclusive	RPA190	1671000	1452100	NA	NA
Total_exclusive	MYO2	737220	790040	NA	NA
Total_exclusive	SDA1	6936800	6368900	NA	NA
Total_exclusive	RBG1	8143500	8482200	NA	NA
Total_exclusive	NCL1	5649400	6782200	NA	NA
Total_exclusive	SAS10	4305000	5488200	NA	NA
Total_exclusive	MAK5	3901100	6170800	NA	NA
Total_exclusive	TIF1	9923400	7909700	NA	NA
Total_exclusive	PWP2	3212000	2946600	NA	NA
Total_exclusive	SEC21	3010300	4279100	NA	NA
Total_exclusive	MIS1	4214600	4790500	NA	NA
Total_exclusive	PDR12	2150600	2426700	NA	NA
Total_exclusive	MDJ1	10728000	10252000	NA	NA
Total_exclusive	SHM1	7123400	9829900	NA	NA
Total_exclusive	SEC13	14269000	13382000	NA	NA
Total_exclusive	TIF34	9406300	6130900	NA	NA
Total_exclusive	ERG27	14896000	13851000	NA	NA
Total_exclusive	HXT3	7110900	14573000	NA	NA
Total_exclusive	NAB6	2710800	1444800	NA	NA
Total_exclusive	HTB2	51939000	54350000	NA	NA
Total_exclusive	VAS1	2731900	1763400	NA	NA
Total_exclusive	BCP1	9646200	12968000	NA	NA
Total_exclusive	RLI1	8317800	12579000	NA	NA
Total_exclusive	NOP12	4987200	6570600	NA	NA
Total_exclusive	CYS4	4963200	4338300	NA	NA
Total_exclusive	HMG1	2983700	6493800	NA	NA
Total_exclusive	ECM29	742220	527320	NA	NA
Total_exclusive	MSN5	1061100	786340	NA	NA
Total_exclusive	RPF1	22656000	23085000	NA	NA
Total_exclusive	DOP1	663380	522130	NA	NA
Total_exclusive	TCB1	3031200	2769900	NA	NA
Total_exclusive	VMA6	5717700	32051000	NA	NA
Total_exclusive	UTP15	3163200	2622100	NA	NA
Total_exclusive	MRPL3	4808000	5112100	NA	NA
Total_exclusive	SUP45	4752100	5933200	NA	NA
Total_exclusive	ILV5	9365700	10810000	NA	NA
Total_exclusive	UTP13	2472600	2665900	NA	NA
Total_exclusive	NOP9	3081900	2478500	NA	NA
Total_exclusive	RRP3	3335900	6787800	NA	NA
Total_exclusive	TIF6	83499000	201860000	NA	NA
Total_exclusive	RPT5	3229700	5365800	NA	NA
Total_exclusive	MET18	1450800	1371600	NA	NA
Total_exclusive	EBP2	12982000	13148000	NA	NA
Total_exclusive	MRH1	40309000	84082000	NA	NA
Total_exclusive	RPT4	6632300	5884400	NA	NA
Total_exclusive	GCD2	10355000	6335900	NA	NA
Total_exclusive	NUP192	489810	2213900	NA	NA
Total_exclusive	SKI3	790350	552300	NA	NA
Total_exclusive	DIP2	1702600	927440	NA	NA
Total_exclusive	EGD2	118560000	147940000	NA	NA
Total_exclusive	MET6	1645300	2106700	NA	NA
Total_exclusive	TRM1	4031700	6255600	NA	NA
Total_exclusive	ERG13	2738500	4906000	NA	NA
Total_exclusive	RMT2	10826000	7460400	NA	NA
Total_exclusive	RPL22B	460820000	346300000	NA	NA
Total_exclusive	GAS1	3480900	17657000	NA	NA
Total_exclusive	XRN1	598050	1037600	NA	NA
Total_exclusive	IKI3	1528600	1914000	NA	NA
Total_exclusive	NOP13	1466300	5406000	NA	NA
Total_exclusive	ILS1	1446500	1304100	NA	NA
Total_exclusive	HCA4	4782900	6477800	NA	NA
Total_exclusive	SSH1	8028700	10473000	NA	NA
Total_exclusive	BMH1	9070700	9775900	NA	NA
Total_exclusive	MCX1	3982600	2935000	NA	NA
Total_exclusive	DBP9	6577100	5467200	NA	NA
Total_exclusive	GCN3	9384100	5794200	NA	NA
Total_exclusive	MCM5	1014700	1697300	NA	NA
Total_exclusive	RRP8	7916900	5896000	NA	NA
Total_exclusive	DPS1	6071400	3888200	NA	NA
Total_exclusive	UTP4	1906900	1943700	NA	NA
Total_exclusive	NSR1	10072000	15699000	NA	NA
Total_exclusive	NSA1	7341400	6473400	NA	NA
Total_exclusive	PDX1	2282900	9979500	NA	NA
Total_exclusive	RLP7	71424000	67453000	NA	NA
Total_exclusive	RPN2	1110600	2316100	NA	NA
Total_exclusive	URB2	1316400	1096800	NA	NA
Total_exclusive	NUM1	1581000	1863700	NA	NA
Total_exclusive	NOC3	5010400	5340500	NA	NA
Total_exclusive	YRA1	42968000	70219000	NA	NA
Total_exclusive	RSM23	5557800	3024200	NA	NA
Total_exclusive	HEM1	4839100	1811000	NA	NA
Total_exclusive	ATP3	11529000	9184800	NA	NA
Total_exclusive	EMW1	1431100	1249400	NA	NA
Total_exclusive	SPF1	944840	2412400	NA	NA
Total_exclusive	SSZ1	2197900	3795600	NA	NA
Total_exclusive	TRM5	2914000	2622400	NA	NA
Total_exclusive	YML6	9714300	7295400	NA	NA
Total_exclusive	NSA2	20041000	22912000	NA	NA
Total_exclusive	OLE1	4702400	26574000	NA	NA
Total_exclusive	GAR1	60216000	55025000	NA	NA
Total_exclusive	RCM1	2137200	1274700	NA	NA
Total_exclusive	RPS29A	297860000	242360000	NA	NA
Total_exclusive	SSE1	1596000	1836800	NA	NA
Total_exclusive	TRM3	661940	408320	NA	NA
Total_exclusive	CHO2	2728700	2957900	NA	NA
Total_exclusive	RIX1	2386200	2924600	NA	NA
Total_exclusive	RRB1	9651900	8546700	NA	NA
Total_exclusive	OPI3	15778000	12373000	NA	NA
Total_exclusive	YHM2	27201000	31371000	NA	NA
Total_exclusive	MET17	7940000	6532000	NA	NA
Total_exclusive	UTP21	1519600	1562700	NA	NA
Total_exclusive	SKI2	355920	364230	NA	NA
Total_exclusive	TCB2	1280300	683890	NA	NA
Total_exclusive	GGC1	9848900	9438900	NA	NA
Total_exclusive	KRI1	2466600	3719600	NA	NA
Total_exclusive	RPS27A	3291600000	3163800000	NA	NA
Total_exclusive	ETT1	10460000	11156000	NA	NA
Total_exclusive	NOP8	3112000	2569700	NA	NA
Total_exclusive	SYO1	4105600	5947100	NA	NA
Total_exclusive	OSH3	619860	383440	NA	NA
Total_exclusive	REP1	4309500	2627600	NA	NA
Total_exclusive	IPI3	2993000	3596200	NA	NA
Total_exclusive	CCT2	4045500	4553000	NA	NA
Total_exclusive	YPP1	897440	2423000	NA	NA
Total_exclusive	WBP1	3748300	18831000	NA	NA
Total_exclusive	AAH1	5721900	3103500	NA	NA
Total_exclusive	NIP7	16015000	15697000	NA	NA
Total_exclusive	ERG11	9183600	7936900	NA	NA
Total_exclusive	PIL1	12712000	8525500	NA	NA
Total_exclusive	MRPL35	5943300	4377600	NA	NA
Total_exclusive	DRS1	2116500	2278300	NA	NA
Total_exclusive	MRP7	4288400	5778800	NA	NA
Total_exclusive	EGD1	53341000	59704000	NA	NA
Total_exclusive	PRE10	8787400	8684100	NA	NA
Total_exclusive	ELP3	1924700	2816500	NA	NA
Total_exclusive	AAT1	2915300	3027800	NA	NA
Total_exclusive	GNP1	4438100	3012000	NA	NA
Total_exclusive	MCM7	1177800	882390	NA	NA
Total_exclusive	SNQ2	657700	1366200	NA	NA
Total_exclusive	RRP1	10712000	15747000	NA	NA
Total_exclusive	CEX1	1944900	954210	NA	NA
Total_exclusive	CSE1	1465700	2137300	NA	NA
Total_exclusive	RPC82	829700	3052900	NA	NA
Total_exclusive	NOP16	8907800	16204000	NA	NA
Total_exclusive	TYW1	1010100	2013100	NA	NA
Total_exclusive	KAP122	970920	1243900	NA	NA
Total_exclusive	PRE5	7827300	7468800	NA	NA
Total_exclusive	UTP9	1754800	2700000	NA	NA
Total_exclusive	NUP170	362420	699720	NA	NA
Total_exclusive	DHR2	696770	487930	NA	NA
Total_exclusive	TIF4631	1060000	866080	NA	NA
Total_exclusive	DBP10	1212800	2170600	NA	NA
Total_exclusive	RPO31	272650	926970	NA	NA
Total_exclusive	PWP1	3822100	5004000	NA	NA
Total_exclusive	UTP6	2116500	1007500	NA	NA
Total_exclusive	TMA46	1824500	3767600	NA	NA
Total_exclusive	BGL2	8532700	15003000	NA	NA
Total_exclusive	PRO3	12344000	11008000	NA	NA
Total_exclusive	CBR1	3812100	7216700	NA	NA
Total_exclusive	CLA4	695510	232900	NA	NA
Total_exclusive	CDC28	3604300	1299900	NA	NA
Total_exclusive	YOL098C	438020	8258000	NA	NA
Total_exclusive	TCB3	187000	1624600	NA	NA
Total_exclusive	TOM40	2067600	33076000	NA	NA
Total_exclusive	YVH1	1553100	2351300	NA	NA
Total_exclusive	HMO1	12743000	65349000	NA	NA
Total_exclusive	CAF40	2694900	4046900	NA	NA
Total_exclusive	CDC60	893410	835970	NA	NA
Total_exclusive	DIM1	4507600	4545100	NA	NA
Total_exclusive	SES1	3658800	2523800	NA	NA
Total_exclusive	GSF2	5486200	7302500	NA	NA
Total_exclusive	ERG1	2258300	3352400	NA	NA
Total_exclusive	ARO8	726000	2217900	NA	NA
Total_exclusive	DED81	1858000	1988200	NA	NA
Total_exclusive	SLY1	1026300	921150	NA	NA
Total_exclusive	NOT3	2025000	1816600	NA	NA
Total_exclusive	LOS1	1449800	873850	NA	NA
Total_exclusive	LSG1	1013400	2079900	NA	NA
Total_exclusive	PHB1	1898400	24089000	NA	NA
Total_exclusive	ARC1	3373600	2562500	NA	NA
Total_exclusive	TSR1	2488800	2333400	NA	NA
Total_exclusive	UBA4	2408100	2058100	NA	NA
Total_exclusive	HXT2	4117400	7615200	NA	NA
Total_exclusive	RPF2	12468000	12285000	NA	NA
Total_exclusive	MRPS5	7489300	3553700	NA	NA
Total_exclusive	MSH2	484990	947650	NA	NA
Total_exclusive	MTR10	860920	459470	NA	NA
Total_exclusive	CTR86	845200	507770	NA	NA
Total_exclusive	CPA2	186230	1288500	NA	NA
Total_exclusive	TCP1	1689600	1837600	NA	NA
Total_exclusive	SPT16	285380	523400	NA	NA
Total_exclusive	IST2	1233000	3291900	NA	NA
Total_exclusive	NAM9	2247900	1575900	NA	NA
Total_exclusive	COQ1	2593500	2446400	NA	NA
Total_exclusive	SQT1	8350700	12117000	NA	NA
Total_exclusive	SEH1	649960	1702400	NA	NA
Total_exclusive	GAP1	3113300	5460800	NA	NA
Total_exclusive	TSA1	8537800	16837000	NA	NA
Total_exclusive	TIF35	6898700	6719800	NA	NA
Total_exclusive	ILV3	2541900	1351500	NA	NA
Total_exclusive	RCL1	3603200	3994700	NA	NA
Total_exclusive	ROK1	1619300	1332200	NA	NA
Total_exclusive	RFC1	487500	1184100	NA	NA
Total_exclusive	VAC8	3271100	4372600	NA	NA
Total_exclusive	LOC1	24866000	51660000	NA	NA
Total_exclusive	PRE6	5083900	6982900	NA	NA
Total_exclusive	CYS3	5724000	2500200	NA	NA
Total_exclusive	RNR2	2459600	1300600	NA	NA
Total_exclusive	RPN3	1126400	1294600	NA	NA
Total_exclusive	SEC28	8424900	5928000	NA	NA
Total_exclusive	YNR021W	3070800	5344800	NA	NA
Total_exclusive	HTA1	112180000	132310000	NA	NA
Total_exclusive	HSP26	11603000	7285700	NA	NA
Total_exclusive	AFG2	1099600	270470	NA	NA
Total_exclusive	LIP5	1191500	2524900	NA	NA
Total_exclusive	GLY1	3324800	2588900	NA	NA
Total_exclusive	ALA1	763800	366840	NA	NA
Total_exclusive	PRE9	5147300	6169400	NA	NA
Total_exclusive	RFC4	1700900	2470700	NA	NA
Total_exclusive	INO80	346960	689730	NA	NA
Total_exclusive	RFC2	3236800	4391400	NA	NA
Total_exclusive	MON2	410260	284810	NA	NA
Total_exclusive	PUP2	5182700	6018800	NA	NA
Total_exclusive	COX2	9181100	39570000	NA	NA
Total_exclusive	PUF3	579480	858130	NA	NA
Total_exclusive	PNO1	7551200	7045100	NA	NA
Total_exclusive	MRPL17	2570000	2673500	NA	NA
Total_exclusive	SCJ1	2884700	4007400	NA	NA
Total_exclusive	MRPS35	2985600	2733000	NA	NA
Total_exclusive	RKR1	307840	227560	NA	NA
Total_exclusive	CCR4	2170600	1217200	NA	NA
Total_exclusive	GCD11	2575600	3277500	NA	NA
Total_exclusive	PHO88	1767000	11520000	NA	NA
Total_exclusive	YCP4	1930700	3441300	NA	NA
Total_exclusive	SAC1	999440	1263600	NA	NA
Total_exclusive	PUF6	995440	1213900	NA	NA
Total_exclusive	NAT1	2644500	885480	NA	NA
Total_exclusive	RPS30B	200290000	160730000	NA	NA
Total_exclusive	NOP15	24368000	17914000	NA	NA
Total_exclusive	SEC61	2873400	644700	NA	NA
Total_exclusive	SSD1	20832000	23504000	NA	NA
Total_exclusive	GUA1	3167600	2708900	NA	NA
Total_exclusive	SEC53	2034100	1248500	NA	NA
Total_exclusive	SFB2	641740	776650	NA	NA
Total_exclusive	TUF1	729620	1463900	NA	NA
Total_exclusive	NOP53	2597600	2390000	NA	NA
Total_exclusive	GEA2	412440	347400	NA	NA
Total_exclusive	ARF1	6286800	2563400	NA	NA
Total_exclusive	POL3	472450	482560	NA	NA
Total_exclusive	MRPL40	4702300	4187100	NA	NA
Total_exclusive	TMA19	32176000	42591000	NA	NA
Total_exclusive	MGM101	1216100	5115100	NA	NA
Total_exclusive	SEC23	1472600	1279200	NA	NA
Total_exclusive	RSC8	420500	1969400	NA	NA
Total_exclusive	PMT1	560760	4591000	NA	NA
Total_exclusive	ERG5	2931000	1546600	NA	NA
Total_exclusive	MRP1	3807500	1805900	NA	NA
Total_exclusive	EXG1	3960300	3904900	NA	NA
Total_exclusive	MRP51	2451300	2203300	NA	NA
Total_exclusive	PUF4	1917800	508870	NA	NA
Total_exclusive	ELO2	16219000	12378000	NA	NA
Total_exclusive	GPP1	5793800	6129500	NA	NA
Total_exclusive	KAP120	1157700	434840	NA	NA
Total_exclusive	SCS7	3167500	4404100	NA	NA
Total_exclusive	HGH1	1055500	1304900	NA	NA
Total_exclusive	MCM2	301940	315580	NA	NA
Total_exclusive	PRP43	1400900	4459400	NA	NA
Total_exclusive	REI1	2532000	2278100	NA	NA
Total_exclusive	SRP40	29376000	22189000	NA	NA
Total_exclusive	RSC3	286490	757450	NA	NA
Total_exclusive	ATP5	1640600	3779500	NA	NA
Total_exclusive	NHP2	47588000	30686000	NA	NA
Total_exclusive	WHI3	3171500	2443100	NA	NA
Total_exclusive	YBP2	1347500	1286000	NA	NA
Total_exclusive	AAP1	337630	302430	NA	NA
Total_exclusive	TPI1	5790700	14883000	NA	NA
Total_exclusive	IML2	809920	627720	NA	NA
Total_exclusive	PPH22	2664400	2798900	NA	NA
Total_exclusive	CKA2	5477300	5606600	NA	NA
Total_exclusive	TRA1	52679	86559	NA	NA
Total_exclusive	MRPL24	3160200	3998900	NA	NA
Total_exclusive	GLC7	4157000	6376100	NA	NA
Total_exclusive	SCS2	5809100	8532500	NA	NA
Total_exclusive	MRPL7	3657300	4610300	NA	NA
Total_exclusive	SIS1	1437000	2881700	NA	NA
Total_exclusive	YPT31	3719200	1827100	NA	NA
Total_exclusive	NDE1	1253400	2303200	NA	NA
Total_exclusive	RIP1	6297400	28188000	NA	NA
Total_exclusive	RSM24	1430500	1720800	NA	NA
Total_exclusive	MRPL4	4316100	4272400	NA	NA
Total_exclusive	MRPS17	3915600	2818100	NA	NA
Total_exclusive	SLC1	4613900	6910800	NA	NA
Total_exclusive	SGD1	920740	751270	NA	NA
Total_exclusive	EMG1	1587100	2011400	NA	NA
Total_exclusive	RIA1	488230	589490	NA	NA
Total_exclusive	ERG6	2208400	1586400	NA	NA
Total_exclusive	RIM2	3318500	5667400	NA	NA
Total_exclusive	YGR210C	1406500	3288900	NA	NA
Total_exclusive	NOC4	1796700	1685500	NA	NA
Total_exclusive	ALG9	1498700	3776600	NA	NA
Total_exclusive	SRP54	2614500	1136400	NA	NA
Total_exclusive	PET123	1299600	1112700	NA	NA
Total_exclusive	RPN6	581240	1713200	NA	NA
Total_exclusive	YMR310C	2915100	1359100	NA	NA
Total_exclusive	MCM3	859620	441530	NA	NA
Total_exclusive	YDR341C	989900	925050	NA	NA
Total_exclusive	BFR2	534610	1028300	NA	NA
Total_exclusive	INO1	2167900	352260	NA	NA
Total_exclusive	TAF6	770780	1646900	NA	NA
Total_exclusive	HOM6	1936400	2209900	NA	NA
Total_exclusive	MOT1	105760	38929	NA	NA
Total_exclusive	TRP5	862210	398090	NA	NA
Total_exclusive	APS3	10747000	7350000	NA	NA
Total_exclusive	SSF1	3341800	2777500	NA	NA
Total_exclusive	PMT4	484630	6253100	NA	NA
Total_exclusive	PHB2	641860	10339000	NA	NA
Total_exclusive	DCP2	816560	291080	NA	NA
Total_exclusive	RLP24	66243000	65800000	NA	NA
Total_exclusive	TKL1	910440	2011000	NA	NA
Total_exclusive	MRPS9	4772500	4159000	NA	NA
Total_exclusive	CRG1	2299800	2742600	NA	NA
Total_exclusive	SPB4	1359800	793650	NA	NA
Total_exclusive	BUD23	8053500	1848700	NA	NA
Total_exclusive	PUS1	506950	1231500	NA	NA
Total_exclusive	RRP9	661370	1666700	NA	NA
Total_exclusive	ADE3	1065700	926850	NA	NA
Total_exclusive	IMP4	4027100	3312700	NA	NA
Total_exclusive	UTP18	1514300	1100200	NA	NA
Total_exclusive	ARP8	533190	414430	NA	NA
Total_exclusive	TSC13	2742700	3811900	NA	NA
Total_exclusive	UTP7	2426100	2459900	NA	NA
Total_exclusive	SAM3	2795300	4944800	NA	NA
Total_exclusive	PET10	4198500	2044500	NA	NA
Total_exclusive	NUP133	311060	461320	NA	NA
Total_exclusive	SAR1	5917700	4884100	NA	NA
Total_exclusive	RTS1	1183600	1363300	NA	NA
Total_exclusive	RPC19	7081100	6384200	NA	NA
Total_exclusive	MRD1	215650	288670	NA	NA
Total_exclusive	TIM23	8515700	6945700	NA	NA
Total_exclusive	NHP6B	4893900	3555100	NA	NA
Total_exclusive	STH1	182850	225410	NA	NA
Total_exclusive	DBP7	768100	779560	NA	NA
Total_exclusive	RSA4	2629200	1756200	NA	NA
Total_exclusive	TRS31	1748100	1636400	NA	NA
Total_exclusive	STT3	1104600	3040200	NA	NA
Total_exclusive	YPQ1	10352000	11166000	NA	NA
Total_exclusive	FAP7	3749100	2788000	NA	NA
Total_exclusive	YLR419W	301970	228970	NA	NA
Total_exclusive	RPN9	843680	2561200	NA	NA
Total_exclusive	CDC10	1840200	978260	NA	NA
Total_exclusive	RSM28	2041700	3096000	NA	NA
Total_exclusive	WTM1	1102100	1385600	NA	NA
Total_exclusive	ERG10	2022800	1907600	NA	NA
Total_exclusive	MHR1	3782500	4538100	NA	NA
Total_exclusive	DPL1	87827	327250	NA	NA
Total_exclusive	ODC2	2721000	3203600	NA	NA
Total_exclusive	HXK2	1086700	1629400	NA	NA
Total_exclusive	UTP5	2066800	2429400	NA	NA
Total_exclusive	PMT2	505840	2780300	NA	NA
Total_exclusive	RSC9	463510	1140500	NA	NA
Total_exclusive	PUB1	1883900	1939100	NA	NA
Total_exclusive	HST2	510670	936730	NA	NA
Total_exclusive	DUN1	470600	208100	NA	NA
Total_exclusive	ARD1	5591300	2945700	NA	NA
Total_exclusive	VAR1	1391300	866950	NA	NA
Total_exclusive	MRPS28	3246700	3408600	NA	NA
Total_exclusive	ACO1	842030	820150	NA	NA
Total_exclusive	FRS2	1632600	699200	NA	NA
Total_exclusive	ASN2	778380	688350	NA	NA
Total_exclusive	ARC35	1174000	773030	NA	NA
Total_exclusive	RPB3	1162000	888930	NA	NA
Total_exclusive	SEC10	345190	187500	NA	NA
Total_exclusive	MRPL15	4506700	3701300	NA	NA
Total_exclusive	RQC1	545630	628990	NA	NA
Total_exclusive	ERG9	928840	2023800	NA	NA
Total_exclusive	RPA49	435010	971050	NA	NA
Total_exclusive	PRE8	5740700	5759600	NA	NA
Total_exclusive	YPT1	3745500	3580500	NA	NA
Total_exclusive	CDC33	5050300	3383100	NA	NA
Total_exclusive	KRE6	968740	1162000	NA	NA
Total_exclusive	ATP4	3568900	8909800	NA	NA
Total_exclusive	IES1	291470	451320	NA	NA
Total_exclusive	EFG1	5335100	3788100	NA	NA
Total_exclusive	RRP14	1029400	730070	NA	NA
Total_exclusive	MRPL10	1543700	3613000	NA	NA
Total_exclusive	ARE2	1291500	314270	NA	NA
Total_exclusive	APM4	563920	579610	NA	NA
Total_exclusive	OTU2	1339800	1983000	NA	NA
Total_exclusive	RPN7	1394600	1027700	NA	NA
Total_exclusive	POP2	3600100	2481300	NA	NA
Total_exclusive	YMC1	3818400	2364400	NA	NA
Total_exclusive	MSH6	191020	164930	NA	NA
Total_exclusive	RPO41	204860	209240	NA	NA
Total_exclusive	UBP3	343260	300660	NA	NA
Total_exclusive	HXT4	1370800	3477500	NA	NA
Total_exclusive	YMC2	1105800	1916700	NA	NA
Total_exclusive	TOM20	3914500	3935000	NA	NA
Total_exclusive	YHR127W	1740800	175890	NA	NA
Total_exclusive	MLC1	1248300	1600300	NA	NA
Total_exclusive	NIC96	122740	431740	NA	NA
Total_exclusive	DLD3	728200	8434000	NA	NA
Total_exclusive	BFR1	472070	463950	NA	NA
Total_exclusive	MOD5	1022700	571200	NA	NA
Total_exclusive	ITR1	827830	726570	NA	NA
Total_exclusive	MRPL11	1542600	2029000	NA	NA
Total_exclusive	SEC4	1680400	1912100	NA	NA
Total_exclusive	FET3	1838400	5084100	NA	NA
Total_exclusive	LST8	777060	935160	NA	NA
Total_exclusive	RDH54	101430	81421	NA	NA
Total_exclusive	RPN13	2728500	3168200	NA	NA
Total_exclusive	PDI1	769860	261060	NA	NA
Total_exclusive	ERG4	1005100	1967800	NA	NA
Total_exclusive	EFB1	5957400	6364200	NA	NA
Total_exclusive	PST2	1854500	22858000	NA	NA
Total_exclusive	VPS74	1146600	1094900	NA	NA
Total_exclusive	IMG1	5558000	2838100	NA	NA
Total_exclusive	SRP21	12206000	8737600	NA	NA
Total_exclusive	BAT1	2140000	1822800	NA	NA
Total_exclusive	GND1	389090	737030	NA	NA
Total_exclusive	ERV25	2833700	6493200	NA	NA
Total_exclusive	MRPS18	6920600	3323400	NA	NA
Total_exclusive	YGR122W	1183500	464510	NA	NA
Total_exclusive	KGD1	682410	500120	NA	NA
Total_exclusive	SMB1	1563500	1918700	NA	NA
Total_exclusive	TOM22	7921100	27660000	NA	NA
Total_exclusive	RFC5	1775500	1837400	NA	NA
Total_exclusive	AXL1	224440	216160	NA	NA
Total_exclusive	LAA1	96363	112220	NA	NA
Total_exclusive	GCG1	2412800	1681200	NA	NA
Total_exclusive	SNU13	11237000	12181000	NA	NA
Total_exclusive	TIF5	397490	861020	NA	NA
Total_exclusive	MRPL23	940550	1204000	NA	NA
Total_exclusive	PRE2	3064600	1684300	NA	NA
Total_exclusive	RPN8	1965700	732760	NA	NA
Total_exclusive	YPL245W	549570	331690	NA	NA
Total_exclusive	MRH4	459980	360190	NA	NA
Total_exclusive	REX4	1419000	1482700	NA	NA
Total_exclusive	SEC65	1465900	1936100	NA	NA
Total_exclusive	RTN1	2760000	4744000	NA	NA
Total_exclusive	BUD20	3529900	5693000	NA	NA
Total_exclusive	GLE2	299440	1874900	NA	NA
Total_exclusive	ORM1	2548800	5150000	NA	NA
Total_exclusive	TRS130	157460	250630	NA	NA
Total_exclusive	GPA1	399660	442700	NA	NA
Total_exclusive	TIM11	13380000	9213300	NA	NA
Total_exclusive	UTP23	2842300	2892100	NA	NA
Total_exclusive	URE2	435740	429030	NA	NA
Total_exclusive	HHO1	1451500	3195900	NA	NA
Total_exclusive	TOD6	247010	233550	NA	NA
Total_exclusive	YLH47	549630	1137100	NA	NA
Total_exclusive	RSM26	1143200	1223500	NA	NA
Total_exclusive	HSH155	260540	411340	NA	NA
Total_exclusive	MPT5	350880	268310	NA	NA
Total_exclusive	SMC3	155260	67289	NA	NA
Total_exclusive	DCP1	1280400	1439400	NA	NA
Total_exclusive	PDS5	111270	133280	NA	NA
Total_exclusive	TOR2	45898	20753	NA	NA
Total_exclusive	APT1	2949100	2657000	NA	NA
Total_exclusive	RPO21	80728	148900	NA	NA
Total_exclusive	SUI3	913250	1270000	NA	NA
Total_exclusive	LTV1	2008900	2214900	NA	NA
Total_exclusive	HRT1	5946100	3146400	NA	NA
Total_exclusive	YRA2	895010	1681500	NA	NA
Total_exclusive	IFA38	406050	1368100	NA	NA
Total_exclusive	THR1	1676500	1106500	NA	NA
Total_exclusive	YOR1	22889	113660	NA	NA
Total_exclusive	MTR4	198180	309470	NA	NA
Total_exclusive	RSM25	1359200	1184000	NA	NA
Total_exclusive	RIO2	1114600	741630	NA	NA
Total_exclusive	RPC34	360080	352070	NA	NA
Total_exclusive	SDH2	860330	926080	NA	NA
Total_exclusive	SEC14	884030	1663300	NA	NA
Total_exclusive	BAP2	665650	1233000	NA	NA
Total_exclusive	XDJ1	999340	598540	NA	NA
Total_exclusive	YNR040W	692350	790520	NA	NA
Total_exclusive	FMP30	384830	287790	NA	NA
Detected_in_both	NAM7	402300000	417570000	2948500000	4005400000
Detected_in_both	RPS1B	2267900000	2146300000	3227100000	2661500000
Detected_in_both	ASC1	1855600000	1601000000	3724200000	2704100000
Detected_in_both	RPL4A	3041400000	3588400000	5814400000	4425600000
Detected_in_both	PMA1	501950000	805820000	617090000	571520000
Detected_in_both	RPL3	1220800000	1227000000	573380000	237180000
Detected_in_both	RPL23A	1869300000	2078200000	1420300000	1188400000
Detected_in_both	FAS2	19615000	30120000	50679000	48055000
Detected_in_both	FAS1	35698000	44516000	41363000	11351000
Detected_in_both	URA2	17500000	16181000	41160000	34090000
Detected_in_both	RPL8B	2341500000	2133600000	3374600000	4492300000
Detected_in_both	SSA2	204010000	264780000	119100000	168320000
Detected_in_both	YHR020W	136830000	120010000	259120000	275140000
Detected_in_both	RPL1A	1702400000	1779700000	3094700000	2352400000
Detected_in_both	TY1B-JR1	27956000	25308000	128880000	92726000
Detected_in_both	RPS4A	1200500000	1314300000	2412600000	1533300000
Detected_in_both	EFT1	81723000	72904000	62428000	77385000
Detected_in_both	CDC19	327930000	270740000	663320000	643440000
Detected_in_both	RPS3	2560700000	2195500000	3219200000	1838500000
Detected_in_both	RPL5	1388400000	1630400000	2839600000	1502300000
Detected_in_both	PDC1	187620000	183060000	434190000	381990000
Detected_in_both	GCN1	8152700	9821900	5710200	3452200
Detected_in_both	DED1	129490000	142490000	143560000	70243000
Detected_in_both	RPL12A	2928200000	2712500000	1809200000	1668100000
Detected_in_both	RPS14B	1576000000	1494500000	2172200000	2183500000
Detected_in_both	RPL9A	1457800000	1544900000	2886000000	3056100000
Detected_in_both	TEF1	573130000	632010000	1042600000	1373300000
Detected_in_both	RPS18A	3217800000	2964500000	2569000000	1995900000
Detected_in_both	SSB1	267750000	294440000	180320000	100350000
Detected_in_both	VMA2	83582000	95936000	238460000	216570000
Detected_in_both	RPL20B	2147800000	2593200000	3168000000	4509000000
Detected_in_both	KAP123	52025000	58319000	101200000	83907000
Detected_in_both	RPP0	2822800000	2891000000	5300000000	5394100000
Detected_in_both	TDH3	126320000	167670000	440560000	363620000
Detected_in_both	RPS6B	1353200000	1585000000	1580000000	1026500000
Detected_in_both	RPL6A	2457600000	2361600000	4652200000	7581200000
Detected_in_both	RPL6B	2235100000	2095800000	4135600000	6681100000
Detected_in_both	PFK1	29541000	25344000	39860000	36560000
Detected_in_both	YEF3	41798000	26171000	44718000	33844000
Detected_in_both	RPL25	1797300000	1923400000	3880600000	5973100000
Detected_in_both	ARO1	11697000	16848000	15708000	16805000
Detected_in_both	RPL10	673950000	630480000	1350500000	1321800000
Detected_in_both	FKS1	13749000	22990000	11719000	2295800
Detected_in_both	GFA1	39959000	31040000	76552000	51938000
Detected_in_both	RPS0A	2685500000	2180300000	2553600000	2273700000
Detected_in_both	RPS24A	1746500000	1753400000	1200100000	947090000
Detected_in_both	RPL7A	2153200000	2395400000	1729700000	1483500000
Detected_in_both	SAM1	79213000	118730000	303200000	533050000
Detected_in_both	RPS22A	1086100000	1183500000	1673400000	693070000
Detected_in_both	RPS7B	1010100000	936110000	1161100000	1109100000
Detected_in_both	NOP1	220800000	217150000	26647000	11303000
Detected_in_both	RPS9B	1778900000	1606400000	644960000	408780000
Detected_in_both	RPL11B	1561400000	1460100000	3588600000	4879000000
Detected_in_both	RPS17A	4106000000	3714300000	1235800000	677640000
Detected_in_both	RPL2B	1781300000	1712200000	602120000	300880000
Detected_in_both	RPS5	2134000000	1986000000	3493900000	2262900000
Detected_in_both	ENO2	58522000	64889000	104870000	107160000
Detected_in_both	RPL16B	954030000	1380100000	709620000	517080000
Detected_in_both	ILV2	44274000	47298000	81806000	80174000
Detected_in_both	ATP2	87652000	98352000	158230000	157990000
Detected_in_both	VMA1	15534000	23453000	23452000	17146000
Detected_in_both	RPL14B	1997100000	1543200000	2069200000	2309500000
Detected_in_both	RPS19A	1206500000	1121000000	497770000	716560000
Detected_in_both	RPL17A	2513200000	2926000000	1929600000	2963600000
Detected_in_both	DBP2	86822000	104360000	7117200	4033000
Detected_in_both	URA7	42533000	27976000	61127000	28105000
Detected_in_both	RPL28	3431900000	3367200000	1625100000	2729000000
Detected_in_both	RPG1	9922100	7754800	12979000	6466400
Detected_in_both	UTP10	6795300	6266800	2218900	1023600
Detected_in_both	RPS8B	2508300000	2239100000	2799000000	3107500000
Detected_in_both	RPL24B	1354300000	1382200000	1429600000	1162200000
Detected_in_both	RPS7A	1456000000	1424200000	1800200000	1449900000
Detected_in_both	NOG1	59352000	63696000	19845000	4475100
Detected_in_both	RPL22A	1927300000	1069000000	590560000	655930000
Detected_in_both	RPS13	2709400000	2437000000	1748600000	1300700000
Detected_in_both	NUG1	68138000	60796000	30777000	4020500
Detected_in_both	RPS20	1447600000	1800200000	2517300000	2380700000
Detected_in_both	MES1	19425000	19613000	28259000	26377000
Detected_in_both	RPS11B	1633200000	1582400000	2852100000	3774600000
Detected_in_both	ATP1	52894000	70062000	73193000	176840000
Detected_in_both	RPS12	1210200000	1033600000	733690000	517220000
Detected_in_both	NOG2	33216000	28656000	50671000	54026000
Detected_in_both	HSP60	39758000	41745000	23266000	10783000
Detected_in_both	RPL38	1477800000	940760000	288330000	305830000
Detected_in_both	HSC82	22289000	24648000	19453000	18095000
Detected_in_both	YHB1	97223000	91532000	148190000	129230000
Detected_in_both	RPL26B	1554600000	1766500000	2428000000	2682600000
Detected_in_both	CDC39	3454800	3337200	2290500	539270
Detected_in_both	RPS15	726590000	757900000	785480000	260550000
Detected_in_both	RPL16A	686120000	1044000000	545700000	492060000
Detected_in_both	MIR1	170190000	162890000	104590000	40758000
Detected_in_both	CRM1	14788000	12312000	14678000	9263800
Detected_in_both	RPS31	614340000	650740000	538650000	905090000
Detected_in_both	APA1	63574000	81782000	124060000	110660000
Detected_in_both	RPS16B	1754300000	1540600000	1387500000	1015100000
Detected_in_both	RPL35B	2404500000	2485000000	1911000000	2227200000
Detected_in_both	MAE1	19237000	20090000	33428000	8016000
Detected_in_both	RVB1	30702000	42476000	61353000	21516000
Detected_in_both	CDC48	13755000	17412000	5419400	11002000
Detected_in_both	RPL30	1201200000	1153500000	1147200000	1294700000
Detected_in_both	SRP68	23914000	17856000	29356000	25105000
Detected_in_both	CCT8	27918000	26276000	42220000	30245000
Detected_in_both	RPL19B	1965600000	2320600000	1133100000	1020100000
Detected_in_both	NOP58	40416000	39810000	17957000	6176500
Detected_in_both	TUB2	57772000	50425000	69185000	107600000
Detected_in_both	KAP95	22046000	24490000	25724000	33226000
Detected_in_both	RPL27A	2756800000	2911800000	3766800000	5494400000
Detected_in_both	ADH1	109030000	106270000	153400000	195830000
Detected_in_both	ENP1	17753000	19988000	11839000	6056900
Detected_in_both	GPM1	134050000	89793000	123950000	93118000
Detected_in_both	RPC40	28384000	32827000	63686000	49332000
Detected_in_both	PET9	31179000	71287000	16816000	25134000
Detected_in_both	DBP3	25661000	32506000	7968500	7089000
Detected_in_both	PDA1	38414000	74580000	11083000	8071300
Detected_in_both	RPL36A	1902800000	1026900000	207210000	207170000
Detected_in_both	CCT4	27549000	23193000	19994000	7447000
Detected_in_both	SRP72	19417000	17531000	20950000	9362100
Detected_in_both	RPL31A	2475400000	2454400000	1101900000	786850000
Detected_in_both	TUB3	29792000	28099000	86963000	116830000
Detected_in_both	YTM1	26340000	24175000	18113000	19354000
Detected_in_both	RPS23B	709710000	640430000	517210000	450490000
Detected_in_both	GLT1	2395000	2074300	2501700	1114400
Detected_in_both	PRT1	8655500	6873100	6157900	8472200
Detected_in_both	ACT1	21006000	15300000	71502000	88108000
Detected_in_both	IDH1	57012000	48488000	100400000	76586000
Detected_in_both	PSA1	77000000	91483000	95453000	194940000
Detected_in_both	RPL18A	1092300000	770890000	210200000	188740000
Detected_in_both	GCD6	7594000	7821800	18492000	5826300
Detected_in_both	RPL32	885040000	1316900000	796390000	697900000
Detected_in_both	TEF4	61681000	38403000	88898000	81611000
Detected_in_both	TUB1	35138000	36787000	67180000	103810000
Detected_in_both	RPL21A	1457900000	1536900000	887950000	644670000
Detected_in_both	MRT4	72986000	64961000	139680000	151510000
Detected_in_both	PFK2	7989400	4217900	8469000	5213800
Detected_in_both	RVB2	12936000	13710000	23982000	13397000
Detected_in_both	SEC26	5071600	4486700	5377200	2040000
Detected_in_both	SSC1	17332000	19854000	4094500	3454800
Detected_in_both	RPL33A	952230000	1587100000	1025400000	1302300000
Detected_in_both	SEC27	7627700	6552400	9500600	2497500
Detected_in_both	SAH1	30638000	31589000	56918000	58767000
Detected_in_both	RPS28A	1616900000	1497500000	48332000	234890000
Detected_in_both	LAT1	27581000	68316000	15419000	29323000
Detected_in_both	PGK1	15697000	29797000	8862800	3151800
Detected_in_both	CCT3	7466300	9394300	4795600	4787400
Detected_in_both	CCT6	11361000	10114000	14132000	5947200
Detected_in_both	SXM1	6040300	7823500	7683500	2059600
Detected_in_both	RPB2	4430800	3402800	5054200	1151800
Detected_in_both	IDH2	58551000	41793000	68736000	100010000
Detected_in_both	FAA4	16256000	13408000	6994100	1520500
Detected_in_both	LEU1	1879700	3482700	8547000	23528000
Detected_in_both	PDB1	88242000	148070000	10202000	33742000
Detected_in_both	MCM4	2372100	2017200	7965700	2786800
Detected_in_both	RPS10A	1272200000	970700000	541750000	398210000
Detected_in_both	CCT5	7412100	8892000	16384000	18862000
Detected_in_both	RPP2B	535870000	354290000	73953000	123630000
Detected_in_both	RPS25B	809830000	777550000	549220000	590040000
Detected_in_both	LCB1	9421100	12339000	21510000	5546300
Detected_in_both	MET10	2423200	2267700	2738500	1262700
Detected_in_both	FBA1	21614000	38745000	48090000	23849000
Detected_in_both	GCD7	13697000	15470000	17719000	14695000
Detected_in_both	KAR2	26246000	28957000	26605000	32732000
Detected_in_both	GDH1	12475000	9570000	9089500	1510500
Detected_in_both	HXT7	17599000	28331000	10063000	14368000
Detected_in_both	ACS2	7059000	7869900	17010000	8462600
Detected_in_both	RPT6	11654000	9416300	21364000	11482000
Detected_in_both	RPT3	5877900	6046400	13469000	8546600
Detected_in_both	RNA1	8032700	8024900	9016300	7322800
Detected_in_both	BRX1	41157000	49885000	8749200	4182000
Detected_in_both	RPN1	898730	2347000	3803400	1199300
Detected_in_both	OAC1	35867000	46774000	16238000	9825200
Detected_in_both	SDH1	6587100	3394900	7763800	5369400
Detected_in_both	PGI1	11252000	9290200	7915300	6451900
Detected_in_both	CCT7	4250100	4657400	3183800	4164800
Detected_in_both	MSS51	3948300	5074500	3996300	6351900
Detected_in_both	THS1	5818200	3595500	3532800	2471300
Detected_in_both	MCM6	1707900	730210	2454900	3291300
Detected_in_both	DPM1	18064000	12933000	11916000	5418400
Detected_in_both	FPR3	91535000	106790000	23292000	15249000
Detected_in_both	PAA1	24973000	20765000	9658200	9239800
Detected_in_both	KAP104	6115500	4912500	5268100	3744200
Detected_in_both	RPL39	1531100000	1725100000	477440000	791810000
Detected_in_both	SEC18	5625300	1839500	6193600	6158500
Detected_in_both	PGA3	10660000	13605000	14387000	18234000
Detected_in_both	SCL1	6011000	6572200	3611700	4797000
Detected_in_both	MRN1	2315900	3867200	4923600	4253800
Detected_in_both	RPS26B	872000000	858810000	609440000	306400000
Detected_in_both	RPT2	4448000	4241200	5474800	8165900
Detected_in_both	RPS29B	315870000	246530000	311530000	176540000
Detected_in_both	RPT1	2428400	4062400	6913300	9236900
Detected_in_both	HOM2	5760300	6092100	3994300	4884700
Detected_in_both	TRP3	4709100	3759600	11225000	8054100
Detected_in_both	ILV1	1831500	3448800	4974900	6759600
Detected_in_both	PRS3	3832900	3104600	11773000	9983300
Detected_in_both	RPL34B	1120600000	1155400000	364910000	441330000
Detected_in_both	PRS1	7904400	3069700	12158000	15067000
Detected_in_both	RPP2A	149420000	95398000	69686000	95862000
Detected_in_both	MAK16	10455000	11269000	2523200	3543400
Detected_in_both	KRS1	2811600	5113900	3930400	5496300
Detected_in_both	PTR2	2200000	5982600	3120600	2268700
Detected_in_both	TRP2	1331700	1425600	2227300	1028300

## Sheet: FLAG-UPF1 (+CHX)
Detection	Protein	Total_1	Total_2	IP_1	IP_2
Total_exclusive	DBP2	102550000	88758000	NA	NA
Total_exclusive	MDN1	1337900	1483400	NA	NA
Total_exclusive	CDC39	3250900	3775400	NA	NA
Total_exclusive	ACC1	3649100	3775400	NA	NA
Total_exclusive	NOP56	65369000	86018000	NA	NA
Total_exclusive	STM1	392850000	387970000	NA	NA
Total_exclusive	RRP12	11425000	14468000	NA	NA
Total_exclusive	RRP5	5773100	5928000	NA	NA
Total_exclusive	CBF5	57800000	82078000	NA	NA
Total_exclusive	ARX1	34825000	24876000	NA	NA
Total_exclusive	PDA1	52838000	58330000	NA	NA
Total_exclusive	UTP20	2552300	3921900	NA	NA
Total_exclusive	NOP7	37362000	38749000	NA	NA
Total_exclusive	MAK21	13211000	13449000	NA	NA
Total_exclusive	GUS1	5075500	15729000	NA	NA
Total_exclusive	OLA1	39154000	51537000	NA	NA
Total_exclusive	HAS1	19398000	22342000	NA	NA
Total_exclusive	NMD3	41733000	35277000	NA	NA
Total_exclusive	UTP22	8078400	6197100	NA	NA
Total_exclusive	PSA1	18131000	31539000	NA	NA
Total_exclusive	HYP2	286150000	365300000	NA	NA
Total_exclusive	TOP2	5050000	3276500	NA	NA
Total_exclusive	PFK2	5657700	6407200	NA	NA
Total_exclusive	KRE33	7936200	6692300	NA	NA
Total_exclusive	SRO9	32429000	32565000	NA	NA
Total_exclusive	VPH1	7592000	20546000	NA	NA
Total_exclusive	SSC1	16104000	20235000	NA	NA
Total_exclusive	MSS116	14695000	11144000	NA	NA
Total_exclusive	CCT6	9154900	10585000	NA	NA
Total_exclusive	ARB1	38674000	22449000	NA	NA
Total_exclusive	RPB2	5161100	5560400	NA	NA
Total_exclusive	SCP160	36678000	4328200	NA	NA
Total_exclusive	MIC60	11427000	12404000	NA	NA
Total_exclusive	POL5	5396400	6319600	NA	NA
Total_exclusive	NOC2	8919200	12411000	NA	NA
Total_exclusive	URB1	1807600	2232400	NA	NA
Total_exclusive	FUN12	8997600	14283000	NA	NA
Total_exclusive	FAA1	8539600	6075700	NA	NA
Total_exclusive	GRS1	6325800	7410500	NA	NA
Total_exclusive	PDR5	2728200	5051100	NA	NA
Total_exclusive	TOM70	6683800	14770000	NA	NA
Total_exclusive	POR1	40841000	131650000	NA	NA
Total_exclusive	QCR2	7269900	24078000	NA	NA
Total_exclusive	SPB1	11253000	9439100	NA	NA
Total_exclusive	ALD6	4658700	7336200	NA	NA
Total_exclusive	PDB1	102400000	140200000	NA	NA
Total_exclusive	GCD1	10615000	7995900	NA	NA
Total_exclusive	SEC63	7992100	18699000	NA	NA
Total_exclusive	SEC7	2758300	2418700	NA	NA
Total_exclusive	NOP2	29338000	17171000	NA	NA
Total_exclusive	PAB1	7657700	18283000	NA	NA
Total_exclusive	NMD5	4503300	5500200	NA	NA
Total_exclusive	NOP4	11401000	14024000	NA	NA
Total_exclusive	LPD1	9329700	13117000	NA	NA
Total_exclusive	MPP10	8769400	10003000	NA	NA
Total_exclusive	LCB1	8582400	8913000	NA	NA
Total_exclusive	MET10	2890400	2152100	NA	NA
Total_exclusive	STT4	1657300	1392700	NA	NA
Total_exclusive	KAR2	29652000	31736000	NA	NA
Total_exclusive	CHC1	1455300	2301200	NA	NA
Total_exclusive	RET1	3311000	2398000	NA	NA
Total_exclusive	NEW1	2204100	3724100	NA	NA
Total_exclusive	GDH1	6736300	5935600	NA	NA
Total_exclusive	HXT7	20959000	19961000	NA	NA
Total_exclusive	FPR4	72541000	83011000	NA	NA
Total_exclusive	UTP8	11843000	13142000	NA	NA
Total_exclusive	BMS1	5856800	6222600	NA	NA
Total_exclusive	COR1	5969200	18867000	NA	NA
Total_exclusive	RPA135	2811000	2831700	NA	NA
Total_exclusive	RIX7	4427100	5211200	NA	NA
Total_exclusive	LCB2	6929000	11879000	NA	NA
Total_exclusive	RPA190	944850	2030900	NA	NA
Total_exclusive	MYO2	1343500	1405800	NA	NA
Total_exclusive	SDA1	8902800	10194000	NA	NA
Total_exclusive	RBG1	38823000	31901000	NA	NA
Total_exclusive	RPT6	13916000	10462000	NA	NA
Total_exclusive	NCL1	4223100	7298500	NA	NA
Total_exclusive	RPT3	10632000	7251300	NA	NA
Total_exclusive	SAS10	7904500	6586800	NA	NA
Total_exclusive	MAK5	8070600	10626000	NA	NA
Total_exclusive	TIF1	9532500	16007000	NA	NA
Total_exclusive	BRX1	43416000	39145000	NA	NA
Total_exclusive	PWP2	6688400	6472800	NA	NA
Total_exclusive	SEC21	4050000	6162900	NA	NA
Total_exclusive	MIS1	3308500	4729100	NA	NA
Total_exclusive	SDH1	4263400	1517700	NA	NA
Total_exclusive	PGI1	8111100	7055600	NA	NA
Total_exclusive	CCT7	4165800	3898300	NA	NA
Total_exclusive	PDR12	1127100	2088000	NA	NA
Total_exclusive	MDJ1	13553000	10820000	NA	NA
Total_exclusive	SHM1	5636900	12854000	NA	NA
Total_exclusive	SEC13	14777000	12232000	NA	NA
Total_exclusive	HXT3	11491000	17874000	NA	NA
Total_exclusive	THS1	2420100	4062500	NA	NA
Total_exclusive	NAB6	1846300	1739600	NA	NA
Total_exclusive	HTB2	86399000	70560000	NA	NA
Total_exclusive	VAS1	1956800	1449400	NA	NA
Total_exclusive	BCP1	11581000	14489000	NA	NA
Total_exclusive	RLI1	8634600	8447900	NA	NA
Total_exclusive	NOP12	6880400	14150000	NA	NA
Total_exclusive	FPR3	113860000	134130000	NA	NA
Total_exclusive	PAA1	14597000	28349000	NA	NA
Total_exclusive	CYS4	2354200	3557000	NA	NA
Total_exclusive	HMG1	2265100	6248700	NA	NA
Total_exclusive	ECM29	1037000	1034000	NA	NA
Total_exclusive	MSN5	600470	1160900	NA	NA
Total_exclusive	RPF1	26279000	16819000	NA	NA
Total_exclusive	DOP1	1169100	836170	NA	NA
Total_exclusive	TCB1	2408400	1778300	NA	NA
Total_exclusive	SEC18	1778000	2486400	NA	NA
Total_exclusive	PGA3	3695000	18856000	NA	NA
Total_exclusive	VMA6	8818500	16631000	NA	NA
Total_exclusive	UTP15	9845800	8384700	NA	NA
Total_exclusive	MRPL3	3886500	4174300	NA	NA
Total_exclusive	SUP45	2924100	4492100	NA	NA
Total_exclusive	ILV5	10148000	13103000	NA	NA
Total_exclusive	UTP13	3026400	5577600	NA	NA
Total_exclusive	NOP9	3928600	6114200	NA	NA
Total_exclusive	RRP3	5807600	9735400	NA	NA
Total_exclusive	SCL1	3854500	5941900	NA	NA
Total_exclusive	MRN1	1942900	4793600	NA	NA
Total_exclusive	RPT5	4665500	5215300	NA	NA
Total_exclusive	MET18	1237900	797440	NA	NA
Total_exclusive	EBP2	19965000	13707000	NA	NA
Total_exclusive	MRH1	42777000	35803000	NA	NA
Total_exclusive	RPT4	7260400	6226700	NA	NA
Total_exclusive	GCD2	13844000	13168000	NA	NA
Total_exclusive	NUP192	213390	2356500	NA	NA
Total_exclusive	SKI3	1890800	992050	NA	NA
Total_exclusive	DIP2	3725600	3153500	NA	NA
Total_exclusive	EGD2	94767000	175510000	NA	NA
Total_exclusive	MET6	1690300	1209800	NA	NA
Total_exclusive	TRM1	3358600	5540800	NA	NA
Total_exclusive	RPT2	8826800	5288000	NA	NA
Total_exclusive	ERG13	8075300	4602500	NA	NA
Total_exclusive	RMT2	12356000	8553300	NA	NA
Total_exclusive	RPL22B	296720000	463910000	NA	NA
Total_exclusive	GAS1	6472900	12132000	NA	NA
Total_exclusive	XRN1	902460	1470400	NA	NA
Total_exclusive	IKI3	1896500	1579500	NA	NA
Total_exclusive	NOP13	5466900	3652600	NA	NA
Total_exclusive	ILS1	867400	1188800	NA	NA
Total_exclusive	HCA4	6070600	6595600	NA	NA
Total_exclusive	RPT1	3040100	3560400	NA	NA
Total_exclusive	SSH1	15748000	15873000	NA	NA
Total_exclusive	BMH1	12250000	14126000	NA	NA
Total_exclusive	MCX1	4228300	3922700	NA	NA
Total_exclusive	DBP9	3294300	5657600	NA	NA
Total_exclusive	GCN3	13008000	12717000	NA	NA
Total_exclusive	HOM2	2519700	5743000	NA	NA
Total_exclusive	RRP8	7601800	7574700	NA	NA
Total_exclusive	DPS1	3225300	2586700	NA	NA
Total_exclusive	UTP4	5699000	3114700	NA	NA
Total_exclusive	NSR1	15578000	36075000	NA	NA
Total_exclusive	NSA1	5921100	2321000	NA	NA
Total_exclusive	PDX1	10136000	5199200	NA	NA
Total_exclusive	RLP7	60391000	71723000	NA	NA
Total_exclusive	RPN2	2156900	1772300	NA	NA
Total_exclusive	URB2	1658300	1520000	NA	NA
Total_exclusive	NUM1	1691700	1963100	NA	NA
Total_exclusive	NOC3	3558500	4568400	NA	NA
Total_exclusive	YRA1	77153000	46041000	NA	NA
Total_exclusive	TRP3	3516700	2989200	NA	NA
Total_exclusive	HEM1	3809400	4592600	NA	NA
Total_exclusive	ATP3	11914000	12317000	NA	NA
Total_exclusive	EMW1	1475000	864360	NA	NA
Total_exclusive	SPF1	2189800	4095400	NA	NA
Total_exclusive	SSZ1	5245600	4352900	NA	NA
Total_exclusive	TRM5	3783300	4056600	NA	NA
Total_exclusive	ILV1	1150000	881950	NA	NA
Total_exclusive	YML6	6095600	6681900	NA	NA
Total_exclusive	NSA2	25445000	21555000	NA	NA
Total_exclusive	OLE1	4791300	10920000	NA	NA
Total_exclusive	GAR1	59551000	39912000	NA	NA
Total_exclusive	RCM1	2230900	1296300	NA	NA
Total_exclusive	RPS29A	257680000	223230000	NA	NA
Total_exclusive	SSE1	3699900	3435200	NA	NA
Total_exclusive	TRM3	669090	1156000	NA	NA
Total_exclusive	CHO2	1856600	3726400	NA	NA
Total_exclusive	RIX1	1335300	2514000	NA	NA
Total_exclusive	RRB1	14373000	11809000	NA	NA
Total_exclusive	OPI3	5394700	12320000	NA	NA
Total_exclusive	PRS3	1359900	1531400	NA	NA
Total_exclusive	YHM2	32087000	37656000	NA	NA
Total_exclusive	MET17	2477300	4646400	NA	NA
Total_exclusive	UTP21	3353700	4196900	NA	NA
Total_exclusive	SKI2	1244400	1607700	NA	NA
Total_exclusive	TCB2	1262500	1591400	NA	NA
Total_exclusive	GGC1	7482400	14551000	NA	NA
Total_exclusive	KRI1	3969300	7983600	NA	NA
Total_exclusive	PRS1	1329000	2262600	NA	NA
Total_exclusive	ETT1	5184300	9561900	NA	NA
Total_exclusive	NOP8	3497500	3400300	NA	NA
Total_exclusive	SYO1	4799100	7255400	NA	NA
Total_exclusive	OSH3	900570	570050	NA	NA
Total_exclusive	RPP2A	108660000	135580000	NA	NA
Total_exclusive	REP1	5311900	3579700	NA	NA
Total_exclusive	MAK16	13429000	10917000	NA	NA
Total_exclusive	KRS1	1520800	2037300	NA	NA
Total_exclusive	IPI3	2448200	1886100	NA	NA
Total_exclusive	CCT2	1693600	2255000	NA	NA
Total_exclusive	YPP1	2941900	663260	NA	NA
Total_exclusive	WBP1	3134700	12468000	NA	NA
Total_exclusive	PTR2	3615800	6102900	NA	NA
Total_exclusive	AAH1	3496500	8488600	NA	NA
Total_exclusive	NIP7	13856000	16256000	NA	NA
Total_exclusive	ERG11	9018400	9160100	NA	NA
Total_exclusive	PIL1	6048400	7689100	NA	NA
Total_exclusive	MRPL35	4407600	4458600	NA	NA
Total_exclusive	DRS1	1358800	3847900	NA	NA
Total_exclusive	MRP7	5951300	7360600	NA	NA
Total_exclusive	EGD1	67795000	93353000	NA	NA
Total_exclusive	ELP3	2637200	3211400	NA	NA
Total_exclusive	AAT1	1826200	3706200	NA	NA
Total_exclusive	GNP1	2582400	3667600	NA	NA
Total_exclusive	MCM7	795650	827340	NA	NA
Total_exclusive	SNQ2	1096100	1142400	NA	NA
Total_exclusive	RRP1	16471000	12638000	NA	NA
Total_exclusive	CEX1	3798400	3010900	NA	NA
Total_exclusive	CSE1	1756000	3033500	NA	NA
Total_exclusive	RPC82	1971600	2580900	NA	NA
Total_exclusive	NOP16	9744500	10668000	NA	NA
Total_exclusive	TYW1	710860	1213200	NA	NA
Total_exclusive	KAP122	1357400	908460	NA	NA
Total_exclusive	PRE5	7549000	12135000	NA	NA
Total_exclusive	UTP9	5706500	5402100	NA	NA
Total_exclusive	NUP170	155700	537890	NA	NA
Total_exclusive	DHR2	1731700	1028100	NA	NA
Total_exclusive	TIF4631	1771100	3003000	NA	NA
Total_exclusive	DBP10	1638900	1871400	NA	NA
Total_exclusive	RPO31	365060	667500	NA	NA
Total_exclusive	PWP1	4892200	6555000	NA	NA
Total_exclusive	UTP6	4753200	4178900	NA	NA
Total_exclusive	TMA46	20537000	19214000	NA	NA
Total_exclusive	BGL2	7710500	12120000	NA	NA
Total_exclusive	PRO3	13989000	15040000	NA	NA
Total_exclusive	CBR1	3719600	5112400	NA	NA
Total_exclusive	CLA4	850220	601490	NA	NA
Total_exclusive	CDC28	2877300	5098200	NA	NA
Total_exclusive	YOL098C	901130	7784200	NA	NA
Total_exclusive	TCB3	559850	944330	NA	NA
Total_exclusive	TOM40	2009900	17064000	NA	NA
Total_exclusive	YVH1	2200900	3167700	NA	NA
Total_exclusive	HMO1	58782000	60223000	NA	NA
Total_exclusive	CAF40	3819800	4418400	NA	NA
Total_exclusive	CDC60	292490	494420	NA	NA
Total_exclusive	DIM1	5925100	5919400	NA	NA
Total_exclusive	SES1	542510	1303800	NA	NA
Total_exclusive	GSF2	4382000	5445600	NA	NA
Total_exclusive	ERG1	2937600	1910400	NA	NA
Total_exclusive	ARO8	3046600	1534100	NA	NA
Total_exclusive	DED81	2096100	2423500	NA	NA
Total_exclusive	SLY1	1145300	2358600	NA	NA
Total_exclusive	NOT3	1328500	530540	NA	NA
Total_exclusive	LOS1	987350	1544200	NA	NA
Total_exclusive	LSG1	1970800	2165100	NA	NA
Total_exclusive	PHB1	1347900	9380200	NA	NA
Total_exclusive	ARC1	3399700	4676600	NA	NA
Total_exclusive	TSR1	2628500	1992700	NA	NA
Total_exclusive	UBA4	2399900	2798700	NA	NA
Total_exclusive	HXT2	5306900	6707000	NA	NA
Total_exclusive	RPF2	11360000	9211100	NA	NA
Total_exclusive	MRPS5	4560900	3610600	NA	NA
Total_exclusive	MSH2	938010	1118900	NA	NA
Total_exclusive	MTR10	1231800	1239900	NA	NA
Total_exclusive	CTR86	1626300	1899600	NA	NA
Total_exclusive	CPA2	1300400	1723700	NA	NA
Total_exclusive	TCP1	1460200	3002700	NA	NA
Total_exclusive	SPT16	147160	481500	NA	NA
Total_exclusive	IST2	591620	2405000	NA	NA
Total_exclusive	NAM9	2221600	1637300	NA	NA
Total_exclusive	COQ1	2801100	2650200	NA	NA
Total_exclusive	SQT1	8218900	14618000	NA	NA
Total_exclusive	SEH1	2634500	2619000	NA	NA
Total_exclusive	GAP1	1281000	3790800	NA	NA
Total_exclusive	TSA1	8584200	14858000	NA	NA
Total_exclusive	TIF35	14835000	10583000	NA	NA
Total_exclusive	ILV3	839460	995350	NA	NA
Total_exclusive	RCL1	5430100	6729100	NA	NA
Total_exclusive	ROK1	2426400	3610300	NA	NA
Total_exclusive	RFC1	1287800	675620	NA	NA
Total_exclusive	VAC8	3340500	2090300	NA	NA
Total_exclusive	LOC1	31593000	32782000	NA	NA
Total_exclusive	PRE6	4832100	10071000	NA	NA
Total_exclusive	CYS3	3731100	3460300	NA	NA
Total_exclusive	RNR2	545610	826170	NA	NA
Total_exclusive	RPN3	1732600	2333300	NA	NA
Total_exclusive	SEC28	6593100	12647000	NA	NA
Total_exclusive	YNR021W	2754900	8652700	NA	NA
Total_exclusive	HTA1	195740000	168150000	NA	NA
Total_exclusive	HSP26	9368100	7276500	NA	NA
Total_exclusive	AFG2	769150	388590	NA	NA
Total_exclusive	LIP5	2022500	2931800	NA	NA
Total_exclusive	GLY1	1464800	2137800	NA	NA
Total_exclusive	ALA1	600370	779650	NA	NA
Total_exclusive	PRE9	3496900	8992200	NA	NA
Total_exclusive	RFC4	1590800	1993200	NA	NA
Total_exclusive	INO80	885940	526120	NA	NA
Total_exclusive	RFC2	2343700	1611900	NA	NA
Total_exclusive	MON2	162660	349530	NA	NA
Total_exclusive	PUP2	7868800	3981300	NA	NA
Total_exclusive	COX2	10280000	22774000	NA	NA
Total_exclusive	PUF3	588690	685310	NA	NA
Total_exclusive	MRP4	3923900	2162200	NA	NA
Total_exclusive	PNO1	7947500	10290000	NA	NA
Total_exclusive	MRPL17	3251700	2527800	NA	NA
Total_exclusive	SCJ1	3361300	3859100	NA	NA
Total_exclusive	MRPS35	2874700	3216000	NA	NA
Total_exclusive	RKR1	598840	570230	NA	NA
Total_exclusive	CCR4	1034400	1800400	NA	NA
Total_exclusive	GCD11	3982000	3679900	NA	NA
Total_exclusive	PHO88	2645000	16434000	NA	NA
Total_exclusive	YCP4	3094800	4956100	NA	NA
Total_exclusive	SAC1	1106100	2548300	NA	NA
Total_exclusive	PUF6	1847600	2990900	NA	NA
Total_exclusive	NAT1	1468900	2716200	NA	NA
Total_exclusive	NOP15	17033000	17981000	NA	NA
Total_exclusive	SEC61	7796300	10112000	NA	NA
Total_exclusive	SSD1	21697000	21285000	NA	NA
Total_exclusive	GUA1	1081000	1220800	NA	NA
Total_exclusive	SEC53	3371300	6212400	NA	NA
Total_exclusive	SFB2	240300	518380	NA	NA
Total_exclusive	TUF1	876200	2778300	NA	NA
Total_exclusive	GEA2	733300	280030	NA	NA
Total_exclusive	ARF1	7432100	6398200	NA	NA
Total_exclusive	POL3	419530	358120	NA	NA
Total_exclusive	MRPL40	3429100	4081400	NA	NA
Total_exclusive	TMA19	32772000	60424000	NA	NA
Total_exclusive	MGM101	4865900	4073700	NA	NA
Total_exclusive	SEC23	1626100	1748800	NA	NA
Total_exclusive	RSC8	1772500	1743500	NA	NA
Total_exclusive	PMT1	670630	4770900	NA	NA
Total_exclusive	ERG5	1910000	1944500	NA	NA
Total_exclusive	MRP1	2854600	2286600	NA	NA
Total_exclusive	EXG1	4491500	3082100	NA	NA
Total_exclusive	MRP51	3218800	2034000	NA	NA
Total_exclusive	PUF4	1184800	1069100	NA	NA
Total_exclusive	ELO2	17829000	21090000	NA	NA
Total_exclusive	GPP1	4513900	9782500	NA	NA
Total_exclusive	KAP120	947030	1064200	NA	NA
Total_exclusive	SCS7	3122700	6415800	NA	NA
Total_exclusive	HGH1	1407900	3690500	NA	NA
Total_exclusive	MCM2	508470	824360	NA	NA
Total_exclusive	BEM2	218430	209750	NA	NA
Total_exclusive	PRP43	848960	433260	NA	NA
Total_exclusive	REI1	2031600	2047600	NA	NA
Total_exclusive	SRP40	37135000	32243000	NA	NA
Total_exclusive	RSC3	1996600	690510	NA	NA
Total_exclusive	ATP5	4875200	5953900	NA	NA
Total_exclusive	NHP2	52337000	84771000	NA	NA
Total_exclusive	WHI3	2977500	3561400	NA	NA
Total_exclusive	YBP2	803570	1321300	NA	NA
Total_exclusive	AAP1	433860	517240	NA	NA
Total_exclusive	TPI1	8180800	16544000	NA	NA
Total_exclusive	IML2	760840	1130300	NA	NA
Total_exclusive	PPH22	1441900	1784800	NA	NA
Total_exclusive	CKA2	3783000	5422900	NA	NA
Total_exclusive	TRA1	197590	56560	NA	NA
Total_exclusive	MRPL24	4545200	3242900	NA	NA
Total_exclusive	GLC7	4831500	3927100	NA	NA
Total_exclusive	SCS2	3468900	8517600	NA	NA
Total_exclusive	MRPL7	2431700	2552500	NA	NA
Total_exclusive	SIS1	3694000	2714800	NA	NA
Total_exclusive	YCF1	419110	910120	NA	NA
Total_exclusive	YPT31	2829900	1476700	NA	NA
Total_exclusive	NDE1	2728000	1751300	NA	NA
Total_exclusive	RIP1	3368900	11854000	NA	NA
Total_exclusive	RSM24	3190800	2572400	NA	NA
Total_exclusive	KRR1	4938800	3146200	NA	NA
Total_exclusive	MRPL4	4372800	4497800	NA	NA
Total_exclusive	MRPS17	3787500	3309700	NA	NA
Total_exclusive	SLC1	5602900	8420300	NA	NA
Total_exclusive	SGD1	1192800	1207900	NA	NA
Total_exclusive	EMG1	6658500	4774800	NA	NA
Total_exclusive	RIA1	298650	811290	NA	NA
Total_exclusive	OST1	3043400	2517400	NA	NA
Total_exclusive	ERG6	1707100	2512400	NA	NA
Total_exclusive	RIM2	3127300	4737300	NA	NA
Total_exclusive	YGR210C	666820	2269900	NA	NA
Total_exclusive	NOC4	2396900	3411600	NA	NA
Total_exclusive	ALG9	1151100	5350000	NA	NA
Total_exclusive	VMA5	1222800	1811500	NA	NA
Total_exclusive	SRP54	1281700	1547200	NA	NA
Total_exclusive	PET123	3869600	2160000	NA	NA
Total_exclusive	RPN6	1982300	2738500	NA	NA
Total_exclusive	YMR310C	2428800	3484600	NA	NA
Total_exclusive	MCM3	1304500	1770600	NA	NA
Total_exclusive	MRPL8	3852800	3503100	NA	NA
Total_exclusive	YDR341C	488020	906800	NA	NA
Total_exclusive	BFR2	2375900	1405200	NA	NA
Total_exclusive	TAF6	725760	2200200	NA	NA
Total_exclusive	HOM6	1536100	1777800	NA	NA
Total_exclusive	MOT1	107700	131090	NA	NA
Total_exclusive	TRP5	464350	497010	NA	NA
Total_exclusive	APS3	13027000	12855000	NA	NA
Total_exclusive	SSF1	3086700	2746800	NA	NA
Total_exclusive	RLP24	64899000	70709000	NA	NA
Total_exclusive	MRPS9	5030400	4327900	NA	NA
Total_exclusive	CRG1	3130500	2029000	NA	NA
Total_exclusive	ERG26	2032800	4224300	NA	NA
Total_exclusive	BUD23	8727100	8687400	NA	NA
Total_exclusive	RRP9	2998200	3091200	NA	NA
Total_exclusive	ADE3	688560	559090	NA	NA
Total_exclusive	IMP4	4973800	6713700	NA	NA
Total_exclusive	UTP18	5350400	5950400	NA	NA
Total_exclusive	TSC13	675680	708230	NA	NA
Total_exclusive	UTP7	4259500	4390400	NA	NA
Total_exclusive	SAM3	3957500	3724600	NA	NA
Total_exclusive	PET10	1529100	2370200	NA	NA
Total_exclusive	NUP133	212760	599350	NA	NA
Total_exclusive	SAR1	6112800	7370900	NA	NA
Total_exclusive	RTS1	923260	1202600	NA	NA
Total_exclusive	RPC19	4751400	3860800	NA	NA
Total_exclusive	MRD1	193510	314940	NA	NA
Total_exclusive	TIM23	4347200	7698200	NA	NA
Total_exclusive	NHP6B	4279000	5501600	NA	NA
Total_exclusive	STH1	309500	516040	NA	NA
Total_exclusive	NCP1	674710	599700	NA	NA
Total_exclusive	TRS31	1745500	764090	NA	NA
Total_exclusive	STT3	1078300	1896000	NA	NA
Total_exclusive	YPQ1	3740600	4775500	NA	NA
Total_exclusive	FAP7	2081900	3364500	NA	NA
Total_exclusive	YLR419W	400480	577410	NA	NA
Total_exclusive	PUP3	10482000	10344000	NA	NA
Total_exclusive	CDC10	1563900	2155300	NA	NA
Total_exclusive	RSM28	3654800	2237300	NA	NA
Total_exclusive	WTM1	513740	876570	NA	NA
Total_exclusive	ERG10	1309700	2280000	NA	NA
Total_exclusive	MHR1	2604700	3331900	NA	NA
Total_exclusive	DPL1	309790	591490	NA	NA
Total_exclusive	ODC2	911400	2432300	NA	NA
Total_exclusive	HXK2	1191100	956030	NA	NA
Total_exclusive	UTP5	1510300	4742200	NA	NA
Total_exclusive	HST2	616400	880020	NA	NA
Total_exclusive	ARD1	2479800	2854300	NA	NA
Total_exclusive	VAR1	1606100	1888900	NA	NA
Total_exclusive	ARC35	1340900	1637300	NA	NA
Total_exclusive	SEC10	462270	425530	NA	NA
Total_exclusive	MRPL15	2150200	4343100	NA	NA
Total_exclusive	VMA13	362280	1138400	NA	NA
Total_exclusive	RQC1	1060400	279760	NA	NA
Total_exclusive	ERG9	2604700	2596000	NA	NA
Total_exclusive	RPA49	387140	2490100	NA	NA
Total_exclusive	PRE8	4777600	7304400	NA	NA
Total_exclusive	YPT1	3724800	4437800	NA	NA
Total_exclusive	CDC33	3365200	7180100	NA	NA
Total_exclusive	KRE6	356890	595000	NA	NA
Total_exclusive	ATP4	2937700	5216700	NA	NA
Total_exclusive	IES1	688840	335690	NA	NA
Total_exclusive	EFG1	3854200	4465900	NA	NA
Total_exclusive	KTR1	185260	2140800	NA	NA
Total_exclusive	RPN12	818150	2557300	NA	NA
Total_exclusive	NOP14	1438000	501020	NA	NA
Total_exclusive	RPN7	1237600	845740	NA	NA
Total_exclusive	YMC1	3333600	3323400	NA	NA
Total_exclusive	MSH6	346130	196470	NA	NA
Total_exclusive	KTR3	421640	2942400	NA	NA
Total_exclusive	RPO41	240280	193220	NA	NA
Total_exclusive	UBP3	523470	339310	NA	NA
Total_exclusive	DEF1	2215700	2217300	NA	NA
Total_exclusive	YMC2	996590	1803800	NA	NA
Total_exclusive	TOM20	4840900	5155700	NA	NA
Total_exclusive	YHR127W	1773000	1957300	NA	NA
Total_exclusive	MLC1	1767700	2247700	NA	NA
Total_exclusive	NIC96	285310	945570	NA	NA
Total_exclusive	VMA7	6787300	2191900	NA	NA
Total_exclusive	ENP2	1454700	1720700	NA	NA
Total_exclusive	VMA4	1491900	5077400	NA	NA
Total_exclusive	NOT5	609060	1190200	NA	NA
Total_exclusive	MRPL11	1049500	1454900	NA	NA
Total_exclusive	SEC4	1565900	4800600	NA	NA
Total_exclusive	FET3	3465000	4065800	NA	NA
Total_exclusive	VOA1	5144800	4510500	NA	NA
Total_exclusive	LST8	1231800	1235100	NA	NA
Total_exclusive	RDH54	103980	163450	NA	NA
Total_exclusive	PDI1	1272400	1894300	NA	NA
Total_exclusive	ERG4	1058700	2540500	NA	NA
Total_exclusive	EFB1	7238800	8972600	NA	NA
Total_exclusive	PST2	3097900	10663000	NA	NA
Total_exclusive	VPS74	1499500	2343100	NA	NA
Total_exclusive	IMG1	2844700	1766400	NA	NA
Total_exclusive	SRP21	13608000	12204000	NA	NA
Total_exclusive	NPL3	1659700	2009300	NA	NA
Total_exclusive	GND1	1217500	613710	NA	NA
Total_exclusive	PHO86	992120	3470400	NA	NA
Total_exclusive	RRS1	5025700	5058500	NA	NA
Total_exclusive	EMP47	865470	9324300	NA	NA
Total_exclusive	IMP3	1902000	4882100	NA	NA
Total_exclusive	EMP24	2674300	8337000	NA	NA
Total_exclusive	ARP2	455470	1392000	NA	NA
Total_exclusive	AXL1	138250	192060	NA	NA
Total_exclusive	LAA1	173110	53443	NA	NA
Total_exclusive	MKT1	326400	241440	NA	NA
Total_exclusive	NUP120	760270	715390	NA	NA
Total_exclusive	GCG1	1854200	2625900	NA	NA
Total_exclusive	SNU13	15702000	17171000	NA	NA
Total_exclusive	TIF5	1342400	1743500	NA	NA
Total_exclusive	MRPL23	1612900	658540	NA	NA
Total_exclusive	SCH9	1031800	1565500	NA	NA
Total_exclusive	PMR1	371560	923810	NA	NA
Total_exclusive	ELO3	4885800	4220900	NA	NA
Total_exclusive	SPT5	177530	375400	NA	NA
Total_exclusive	PDR1	206010	223760	NA	NA
Total_exclusive	ENA2	332810	910120	NA	NA
Total_exclusive	ISW2	143330	193300	NA	NA
Total_exclusive	ARP9	1664900	1981400	NA	NA
Total_exclusive	VTC2	370880	639410	NA	NA
Total_exclusive	CIR2	217120	151430	NA	NA
Total_exclusive	YPT7	3493600	3187800	NA	NA
Total_exclusive	PPM2	722170	719110	NA	NA
Total_exclusive	VPS1	240100	260980	NA	NA
Total_exclusive	TIM11	11876000	14544000	NA	NA
Total_exclusive	UTP23	2639400	3138700	NA	NA
Total_exclusive	PIM1	242330	397560	NA	NA
Total_exclusive	HHO1	3694200	4117500	NA	NA
Total_exclusive	TOD6	332500	194640	NA	NA
Total_exclusive	RPD3	664850	391670	NA	NA
Total_exclusive	POL30	643650	1214700	NA	NA
Total_exclusive	ERP1	1989000	6438100	NA	NA
Total_exclusive	ALB1	7286900	5115700	NA	NA
Total_exclusive	REH1	4039200	2627200	NA	NA
Total_exclusive	NTE1	189550	121240	NA	NA
Total_exclusive	CHS1	134860	337700	NA	NA
Total_exclusive	SOF1	1313200	651090	NA	NA
Total_exclusive	MBF1	3377900	14571000	NA	NA
Total_exclusive	ARC19	2719400	2574200	NA	NA
Total_exclusive	UTP30	1144700	625490	NA	NA
Total_exclusive	TAF5	1147200	522990	NA	NA
Total_exclusive	ERG3	695340	352420	NA	NA
Total_exclusive	MRPL6	2218600	1460100	NA	NA
Total_exclusive	MRPS8	2616000	2291600	NA	NA
Total_exclusive	RPB10	8809300	8551500	NA	NA
Total_exclusive	ATP17	7218000	8824100	NA	NA
Total_exclusive	SHE2	541030	976520	NA	NA
Total_exclusive	MRPL9	1729700	278620	NA	NA
Total_exclusive	SIT4	864280	978980	NA	NA
Total_exclusive	RPB5	2421400	2820500	NA	NA
Total_exclusive	GCD10	2979400	2221700	NA	NA
Total_exclusive	LOA1	1085700	2178400	NA	NA
Total_exclusive	SUR7	1901200	2111600	NA	NA
Total_exclusive	SHS1	111780	170260	NA	NA
Total_exclusive	LCP5	1297200	1218700	NA	NA
Total_exclusive	ATP7	2802200	1016300	NA	NA
Total_exclusive	SEC5	262820	135970	NA	NA
Total_exclusive	TOR1	45848	43465	NA	NA
Total_exclusive	YLR287C	423790	421490	NA	NA
Total_exclusive	SEC62	767440	2875300	NA	NA
Total_exclusive	SKI8	1467500	1283900	NA	NA
Total_exclusive	HCR1	2350400	628220	NA	NA
Total_exclusive	SEC6	152430	182450	NA	NA
Total_exclusive	SRP101	576680	821640	NA	NA
Total_exclusive	SHE4	214840	118930	NA	NA
Detected_in_both	NAM7	468650000	539170000	2577200000	3399200000
Detected_in_both	RPS1B	2406700000	2059700000	2904900000	2556800000
Detected_in_both	ASC1	1825100000	2000000000	3261700000	3508300000
Detected_in_both	RPL4A	3644200000	3711100000	6001200000	3985500000
Detected_in_both	PMA1	570490000	748050000	247690000	468100000
Detected_in_both	RPL3	1337700000	1263700000	395890000	235950000
Detected_in_both	RPL23A	1955500000	2079800000	1113200000	1116300000
Detected_in_both	FAS2	30350000	27930000	32045000	35503000
Detected_in_both	FAS1	48307000	41815000	26352000	26748000
Detected_in_both	URA2	17171000	21427000	12517000	32652000
Detected_in_both	RPL8B	2594800000	2405800000	2554200000	2468300000
Detected_in_both	SSA2	254300000	190330000	61213000	84322000
Detected_in_both	YHR020W	141790000	151520000	104150000	225770000
Detected_in_both	RPL1A	1598800000	1502600000	2556200000	1935400000
Detected_in_both	TY1B-JR1	43848000	36523000	37896000	31094000
Detected_in_both	RPS4A	1252800000	1320000000	1697500000	1953400000
Detected_in_both	EFT1	70172000	103070000	23333000	53133000
Detected_in_both	CDC19	274810000	304300000	230670000	402720000
Detected_in_both	RPS3	2265300000	2676300000	2708900000	2717100000
Detected_in_both	RPL5	1751200000	1151600000	1686400000	1364900000
Detected_in_both	PDC1	181240000	231850000	126350000	299340000
Detected_in_both	GCN1	11898000	12873000	877270	4268800
Detected_in_both	DED1	152110000	183840000	54154000	84239000
Detected_in_both	RPL12A	2896200000	2748200000	2260200000	1347100000
Detected_in_both	RPS14B	1364900000	1145100000	2473300000	2094900000
Detected_in_both	RPL9A	1793700000	1773000000	2405800000	3868700000
Detected_in_both	TEF1	590010000	943360000	420200000	1154900000
Detected_in_both	RPS18A	2783100000	3396100000	3523700000	3186300000
Detected_in_both	SSB1	232870000	297790000	116550000	176780000
Detected_in_both	VMA2	99686000	100560000	60359000	160130000
Detected_in_both	RPL20B	2804800000	2682400000	4625100000	3069200000
Detected_in_both	KAP123	53550000	77373000	34591000	84097000
Detected_in_both	RPP0	3002800000	2923400000	3534300000	4107900000
Detected_in_both	TDH3	123770000	142080000	146770000	320240000
Detected_in_both	RPS6B	1379000000	1520800000	2259400000	1173900000
Detected_in_both	RPL6A	2759000000	2432900000	5971000000	6018100000
Detected_in_both	RPL6B	2380600000	2118200000	5060300000	5269600000
Detected_in_both	PFK1	20621000	34675000	8796100	34416000
Detected_in_both	YEF3	58638000	74529000	23275000	52350000
Detected_in_both	RPL25	2790400000	1770600000	2973600000	4201500000
Detected_in_both	ARO1	13461000	18548000	3549300	14515000
Detected_in_both	RPL10	584860000	624510000	1171600000	1178900000
Detected_in_both	FKS1	19858000	21636000	2275300	7890700
Detected_in_both	GFA1	39705000	35212000	23608000	47066000
Detected_in_both	RPS0A	2517600000	2522500000	2709300000	2692000000
Detected_in_both	RPS24A	1432500000	1626800000	1287900000	1318400000
Detected_in_both	RPL7A	2331500000	2326700000	3321500000	2228600000
Detected_in_both	SAM1	99080000	104570000	139590000	278990000
Detected_in_both	RPS22A	1197900000	739750000	1744700000	1416100000
Detected_in_both	RPS7B	824190000	1002800000	1327000000	1350700000
Detected_in_both	NOP1	215990000	218560000	9935600	7874700
Detected_in_both	RPS9B	1507700000	1722500000	878780000	568450000
Detected_in_both	RPL11B	1688000000	1625600000	4828200000	5138000000
Detected_in_both	RPS17A	3162300000	3304300000	1447500000	973640000
Detected_in_both	RPL2B	1078000000	1137500000	750010000	219680000
Detected_in_both	RPS5	1903800000	2225400000	3850000000	6895500000
Detected_in_both	ENO2	58952000	74153000	30511000	87030000
Detected_in_both	RPL16B	1258800000	1341200000	837630000	522360000
Detected_in_both	ILV2	44653000	53507000	19525000	94430000
Detected_in_both	ATP2	133060000	123910000	82339000	132040000
Detected_in_both	VMA1	16882000	21171000	9674700	20796000
Detected_in_both	RPL14B	2292200000	1640000000	2003600000	2027200000
Detected_in_both	RPS19A	843580000	1162600000	665650000	596020000
Detected_in_both	RPL17A	2597900000	1724700000	2747800000	2961700000
Detected_in_both	RPS2	1049600000	1135200000	37514000	34902000
Detected_in_both	URA7	42492000	41791000	4899200	44822000
Detected_in_both	RPL28	3019500000	3258700000	2245400000	1690200000
Detected_in_both	YDJ1	210690000	183730000	23651000	6300500
Detected_in_both	RPG1	16863000	13979000	7103300	14956000
Detected_in_both	UTP10	11606000	11086000	1111600	3617700
Detected_in_both	RPS8B	2279200000	1857400000	3195100000	3100700000
Detected_in_both	RPL24B	1593600000	731860000	1065600000	1150400000
Detected_in_both	RPS7A	1205000000	1516000000	1848000000	2223000000
Detected_in_both	NOG1	74972000	64098000	15671000	2774800
Detected_in_both	RPL22A	970570000	1363800000	792310000	945550000
Detected_in_both	RPS13	2314700000	2472700000	2078200000	2159200000
Detected_in_both	NUG1	76261000	65218000	3815600	7743000
Detected_in_both	RPS20	1508400000	1591600000	2023900000	2778500000
Detected_in_both	MES1	33093000	27315000	12606000	44722000
Detected_in_both	RPS11B	1496500000	1637300000	3352900000	3401800000
Detected_in_both	ATP1	57464000	85351000	42684000	79493000
Detected_in_both	RPS12	910530000	1008800000	439580000	360330000
Detected_in_both	NOG2	33192000	30324000	21098000	32467000
Detected_in_both	HSP60	33118000	44423000	6402400	7719000
Detected_in_both	RPL38	1634100000	1494200000	317240000	319250000
Detected_in_both	HSC82	31759000	35728000	17321000	49500000
Detected_in_both	YHB1	90309000	87242000	16482000	89667000
Detected_in_both	RPL26B	1594700000	1673800000	2601900000	2394800000
Detected_in_both	RPS15	733910000	745380000	546320000	1001600000
Detected_in_both	RPL16A	931390000	1018800000	670120000	546230000
Detected_in_both	MIR1	176750000	210380000	20399000	65534000
Detected_in_both	CRM1	12204000	15378000	7066300	10626000
Detected_in_both	RPL43B	313240000	341860000	147620000	74242000
Detected_in_both	RPS21B	571020000	648000000	108400000	147730000
Detected_in_both	RPS31	571700000	668940000	613250000	790990000
Detected_in_both	APA1	86108000	151720000	24650000	133950000
Detected_in_both	RPS16B	1557300000	1743600000	1704200000	1378400000
Detected_in_both	RPL35B	2210500000	2600500000	2357300000	1853600000
Detected_in_both	MAE1	23720000	20333000	10191000	10930000
Detected_in_both	RVB1	41806000	28984000	19816000	11321000
Detected_in_both	CDC48	10974000	16063000	2027900	4678700
Detected_in_both	RPL30	1423800000	1384400000	1008600000	1540600000
Detected_in_both	SRP68	21085000	20999000	13240000	19894000
Detected_in_both	CCT8	27438000	23640000	12344000	22647000
Detected_in_both	ERB1	33255000	25656000	17378000	5340300
Detected_in_both	RPL19B	2420400000	2076300000	996880000	654890000
Detected_in_both	RPL15A	2356100000	2310100000	707830000	203860000
Detected_in_both	NOP58	40474000	53206000	3327500	14421000
Detected_in_both	TUB2	67949000	72440000	38000000	96188000
Detected_in_both	KAP95	21298000	20108000	7869700	28906000
Detected_in_both	RPL27A	2770900000	3102400000	4623600000	4424000000
Detected_in_both	ADH1	86947000	109920000	44423000	172650000
Detected_in_both	ENP1	22500000	24264000	4101300	9898900
Detected_in_both	RPL13B	1659700000	1308800000	371860000	172290000
Detected_in_both	GPM1	112770000	111700000	25075000	52024000
Detected_in_both	RPC40	23838000	31179000	17931000	52039000
Detected_in_both	PET9	47113000	58862000	11451000	16301000
Detected_in_both	DBP3	27526000	42570000	3468400	11938000
Detected_in_both	RPL36A	1918200000	1318400000	118300000	62317000
Detected_in_both	CLU1	4551400	4291100	1200500	1720600
Detected_in_both	NIP1	15442000	10031000	3301500	10961000
Detected_in_both	CCT4	16395000	26687000	4482500	3454100
Detected_in_both	SRP72	18979000	17669000	4617600	7325900
Detected_in_both	RPL31A	2564600000	2449800000	1152200000	683590000
Detected_in_both	TUB3	32654000	32841000	35979000	78677000
Detected_in_both	YTM1	29981000	28526000	21134000	16770000
Detected_in_both	RPS23B	640080000	685770000	672380000	413820000
Detected_in_both	GLT1	2381800	1281600	356590	1785800
Detected_in_both	PRT1	11432000	13192000	3665000	16515000
Detected_in_both	ACT1	18667000	23820000	28142000	25549000
Detected_in_both	IDH1	44423000	34362000	5006500	35358000
Detected_in_both	RPL18A	1135500000	1159600000	237120000	170680000
Detected_in_both	GCD6	9378600	8661400	6359800	8388100
Detected_in_both	RPL32	1061700000	940290000	972940000	863890000
Detected_in_both	TEF4	36928000	64452000	10258000	67964000
Detected_in_both	TUB1	38011000	47204000	37314000	94685000
Detected_in_both	COP1	7105000	8317200	539220	1906800
Detected_in_both	RPL21A	1783200000	1742000000	727710000	373410000
Detected_in_both	MRT4	72263000	78448000	43910000	142930000
Detected_in_both	NAN1	11014000	10987000	1630700	6993800
Detected_in_both	RVB2	19005000	7819900	5474800	5183700
Detected_in_both	SEC26	7900800	9320600	2815500	5631400
Detected_in_both	RPL33A	1128000000	994910000	1314100000	1132400000
Detected_in_both	SEC27	8351900	9755900	4344600	4974500
Detected_in_both	SAH1	18515000	27105000	3741500	16174000
Detected_in_both	RPS28A	1318700000	1140800000	325750000	350820000
Detected_in_both	PSE1	5584000	7687000	708950	18453000
Detected_in_both	LAT1	55585000	50204000	22992000	10470000
Detected_in_both	PGK1	21744000	28798000	2641700	3939900
Detected_in_both	CCT3	8157100	8433100	873350	5147400
Detected_in_both	SXM1	8576800	13705000	1958700	5694900
Detected_in_both	IDH2	48188000	40466000	8101500	41733000
Detected_in_both	CIC1	20603000	28977000	16244000	9038100
Detected_in_both	FAA4	15378000	17850000	3475100	2904400
Detected_in_both	LEU1	2886300	6319500	999740	24219000
Detected_in_both	MCM4	2844400	2026500	1043200	3485200
Detected_in_both	RPS10A	1078100000	822510000	688210000	537910000
Detected_in_both	CCT5	7030100	6579200	3204800	13254000
Detected_in_both	RPP2B	460580000	358370000	90149000	66821000
Detected_in_both	RPS25B	767470000	777220000	518150000	537750000
Detected_in_both	FBA1	21701000	34790000	8298500	25854000
Detected_in_both	GCD7	15299000	15010000	10346000	19572000
Detected_in_both	ACS2	7030800	5210400	3131300	6854900
Detected_in_both	HHF1	593980000	627460000	96098000	78409000
Detected_in_both	RNA1	9739200	11224000	3274700	11796000
Detected_in_both	RPN1	1489200	3010700	1929600	3625600
Detected_in_both	OAC1	37014000	79790000	4320100	7904700
Detected_in_both	MSS51	5723000	8429200	2983200	5912900
Detected_in_both	TIF34	11940000	12784000	4654200	11724000
Detected_in_both	ERG27	19172000	17954000	4716400	6917200
Detected_in_both	MCM6	1977700	960710	572560	2034000
Detected_in_both	DPM1	17170000	21620000	2935600	6017000
Detected_in_both	KAP104	5542600	5598800	3651400	6335600
Detected_in_both	RPL39	1463100000	1908700000	705400000	791770000
Detected_in_both	TIF6	219330000	152540000	42553000	115760000
Detected_in_both	RPS26B	823730000	932150000	654970000	694800000
Detected_in_both	RPS29B	250440000	234140000	125860000	332200000
Detected_in_both	MCM5	2351400	1946200	742370	1940900
Detected_in_both	RSM23	2712300	2729700	1361900	4060400
Detected_in_both	RPL34B	1158600000	1186000000	521870000	337940000
Detected_in_both	RPS27A	2727100000	3188800000	1703200000	1687500000
Detected_in_both	PRE10	8573000	9424200	1617300	14062000
Detected_in_both	RPS30B	133530000	254110000	102140000	109310000

## Sheet: FLAG-UPF1_UPF2_UPF3_EE
Detection	Protein	Total_1	Total_2	IP_1	IP_2
IP_exclusive	FET4	NA	NA	38300000	23700000
IP_exclusive	PRE10	NA	NA	13600000	21500000
IP_exclusive	DCP2	NA	NA	5205400	7457800
IP_exclusive	STT3	NA	NA	3574400	1553000
IP_exclusive	RLP24	NA	NA	292000000	244000000
IP_exclusive	RNQ1	NA	NA	20500000	14600000
IP_exclusive	MEU1	NA	NA	24300000	21000000
Total_exclusive	DBP2	124000000	95300000	NA	NA
Total_exclusive	YDJ1	338000000	221000000	NA	NA
Total_exclusive	STM1	547000000	400000000	NA	NA
Total_exclusive	PDA1	97100000	134000000	NA	NA
Total_exclusive	CLU1	7558600	6638700	NA	NA
Total_exclusive	NOP2	37300000	49200000	NA	NA
Total_exclusive	MSS116	29900000	22600000	NA	NA
Total_exclusive	RBG1	70800000	79300000	NA	NA
Total_exclusive	SPB1	18900000	21700000	NA	NA
Total_exclusive	RRP5	5286700	2941400	NA	NA
Total_exclusive	PDB1	169000000	283000000	NA	NA
Total_exclusive	YTM1	54400000	48600000	NA	NA
Total_exclusive	LAT1	74600000	101000000	NA	NA
Total_exclusive	POR1	36400000	418000000	NA	NA
Total_exclusive	ARX1	50600000	40900000	NA	NA
Total_exclusive	SSC1	31700000	15700000	NA	NA
Total_exclusive	QCR2	6827400	92100000	NA	NA
Total_exclusive	MPP10	14300000	18900000	NA	NA
Total_exclusive	LPD1	16500000	21200000	NA	NA
Total_exclusive	BMS1	8605500	7572000	NA	NA
Total_exclusive	HYP2	358000000	346000000	NA	NA
Total_exclusive	COR1	2732500	78000000	NA	NA
Total_exclusive	MYO2	1773300	2586400	NA	NA
Total_exclusive	RPF1	36900000	28300000	NA	NA
Total_exclusive	NOC2	12100000	12300000	NA	NA
Total_exclusive	ARB1	32300000	28300000	NA	NA
Total_exclusive	NEW1	3184200	4792600	NA	NA
Total_exclusive	SSE1	8155100	13200000	NA	NA
Total_exclusive	TUF1	11400000	10600000	NA	NA
Total_exclusive	SCP160	3555200	2772600	NA	NA
Total_exclusive	RPA190	1258200	1475000	NA	NA
Total_exclusive	DRS1	10400000	12300000	NA	NA
Total_exclusive	UTP22	4872300	4140100	NA	NA
Total_exclusive	NOP12	15000000	15800000	NA	NA
Total_exclusive	DIP2	4670600	3858400	NA	NA
Total_exclusive	HCA4	10200000	12400000	NA	NA
Total_exclusive	SHM1	12800000	11700000	NA	NA
Total_exclusive	FUN12	11000000	7410300	NA	NA
Total_exclusive	NOP13	12300000	6349900	NA	NA
Total_exclusive	SKI3	2377200	1600300	NA	NA
Total_exclusive	EBP2	30100000	25100000	NA	NA
Total_exclusive	UTP4	6531200	5326200	NA	NA
Total_exclusive	BRX1	63900000	54500000	NA	NA
Total_exclusive	VAS1	2790900	2636600	NA	NA
Total_exclusive	MIS1	5009300	3927700	NA	NA
Total_exclusive	PWP1	17200000	12500000	NA	NA
Total_exclusive	RPN2	2202100	5357500	NA	NA
Total_exclusive	TCB3	2461100	3431900	NA	NA
Total_exclusive	IKI3	3220000	2752000	NA	NA
Total_exclusive	PDX1	19700000	27100000	NA	NA
Total_exclusive	GAR1	147000000	138000000	NA	NA
Total_exclusive	RRP1	27500000	23500000	NA	NA
Total_exclusive	NCL1	4022800	4514700	NA	NA
Total_exclusive	NUP192	555300	2302700	NA	NA
Total_exclusive	LSG1	3758000	5314500	NA	NA
Total_exclusive	TMA46	34000000	30800000	NA	NA
Total_exclusive	RLI1	11100000	8039400	NA	NA
Total_exclusive	COQ1	5008200	4324900	NA	NA
Total_exclusive	FAA1	5586700	5809900	NA	NA
Total_exclusive	KRI1	8797000	11300000	NA	NA
Total_exclusive	NSA1	11300000	9535800	NA	NA
Total_exclusive	UTP6	5437100	3928400	NA	NA
Total_exclusive	SGD1	2179600	2637300	NA	NA
Total_exclusive	RPS29A	380000000	399000000	NA	NA
Total_exclusive	HTB1	44300000	29100000	NA	NA
Total_exclusive	PRE9	13100000	11400000	NA	NA
Total_exclusive	MRP4	10100000	12100000	NA	NA
Total_exclusive	EGD2	179000000	108000000	NA	NA
Total_exclusive	RIX1	4089500	3431200	NA	NA
Total_exclusive	YML6	16300000	14300000	NA	NA
Total_exclusive	YRA1	81400000	101000000	NA	NA
Total_exclusive	SNQ2	1477400	1862700	NA	NA
Total_exclusive	TOP2	1789100	1239100	NA	NA
Total_exclusive	HOM2	12000000	7848800	NA	NA
Total_exclusive	TRM1	5063200	15500000	NA	NA
Total_exclusive	OLE1	5019100	33900000	NA	NA
Total_exclusive	TMA19	54200000	62800000	NA	NA
Total_exclusive	MRPL3	6567600	6809700	NA	NA
Total_exclusive	UTP18	8835000	6623600	NA	NA
Total_exclusive	GAS1	14600000	30300000	NA	NA
Total_exclusive	TOM40	3389100	45300000	NA	NA
Total_exclusive	MDJ1	9201100	9960200	NA	NA
Total_exclusive	FPR3	133000000	117000000	NA	NA
Total_exclusive	ACO2	3287200	2965600	NA	NA
Total_exclusive	NSA2	46600000	37000000	NA	NA
Total_exclusive	PHB1	1687500	48600000	NA	NA
Total_exclusive	URB2	1452900	1274900	NA	NA
Total_exclusive	GNP1	7658300	9059100	NA	NA
Total_exclusive	TRM3	936820	614770	NA	NA
Total_exclusive	MRPL8	16900000	14800000	NA	NA
Total_exclusive	SEC21	2421100	3280500	NA	NA
Total_exclusive	SAC1	3447300	2195100	NA	NA
Total_exclusive	PRS1	11000000	6274400	NA	NA
Total_exclusive	MRPL17	8832500	8746100	NA	NA
Total_exclusive	SEH1	5816100	7468600	NA	NA
Total_exclusive	DPS1	3579400	2796800	NA	NA
Total_exclusive	GDH1	4958800	5498000	NA	NA
Total_exclusive	MAK16	22700000	25300000	NA	NA
Total_exclusive	HSP26	45800000	47300000	NA	NA
Total_exclusive	VMA4	5088700	19400000	NA	NA
Total_exclusive	SRP40	43700000	37500000	NA	NA
Total_exclusive	IST2	1279200	3962800	NA	NA
Total_exclusive	CLA4	694570	728520	NA	NA
Total_exclusive	NUP188	382810	1838800	NA	NA
Total_exclusive	MRH1	75600000	108000000	NA	NA
Total_exclusive	IPP1	6884600	4183300	NA	NA
Total_exclusive	RIP1	4797500	71600000	NA	NA
Total_exclusive	BGL2	15700000	11200000	NA	NA
Total_exclusive	SLY1	669360	1922200	NA	NA
Total_exclusive	PYC2	1428100	1076300	NA	NA
Total_exclusive	KAP122	2246700	720710	NA	NA
Total_exclusive	LIP5	4620300	2634100	NA	NA
Total_exclusive	MRPL7	10500000	8961100	NA	NA
Total_exclusive	CCT2	3785900	3764700	NA	NA
Total_exclusive	UTP7	9904400	5553900	NA	NA
Total_exclusive	HGH1	3963300	2563200	NA	NA
Total_exclusive	IMP4	9131800	7706500	NA	NA
Total_exclusive	AAT1	3079500	2208200	NA	NA
Total_exclusive	MRPS17	5884000	4753700	NA	NA
Total_exclusive	URA3	8731300	6183000	NA	NA
Total_exclusive	RNR2	2169600	2431800	NA	NA
Total_exclusive	SPT15	4109900	4513900	NA	NA
Total_exclusive	IMG1	16900000	16900000	NA	NA
Total_exclusive	VMA5	1274200	4615800	NA	NA
Total_exclusive	YMC1	7553300	9710900	NA	NA
Total_exclusive	MRPS5	2193700	5141700	NA	NA
Total_exclusive	NUP133	296290	1040700	NA	NA
Total_exclusive	SHM2	5477200	4195800	NA	NA
Total_exclusive	GLY1	2753900	2490200	NA	NA
Total_exclusive	BEM2	336140	492870	NA	NA
Total_exclusive	YPP1	1953300	1845100	NA	NA
Total_exclusive	IPI3	3722800	1857200	NA	NA
Total_exclusive	MRPL22	10500000	7911400	NA	NA
Total_exclusive	AAH1	4582800	7623100	NA	NA
Total_exclusive	DBP9	3913200	4161100	NA	NA
Total_exclusive	BFR2	3325300	4370100	NA	NA
Total_exclusive	MRPL35	6351900	6957300	NA	NA
Total_exclusive	HTA1	100000000	121000000	NA	NA
Total_exclusive	MRP1	5884800	2574100	NA	NA
Total_exclusive	TCP1	2455400	3412100	NA	NA
Total_exclusive	MRP7	8668000	7759600	NA	NA
Total_exclusive	MSH2	1125500	512180	NA	NA
Total_exclusive	CCR4	2360600	1768300	NA	NA
Total_exclusive	EFB1	29700000	32200000	NA	NA
Total_exclusive	SOF1	4119600	2179300	NA	NA
Total_exclusive	SKI2	792570	667950	NA	NA
Total_exclusive	DHR2	922180	1389200	NA	NA
Total_exclusive	RPF2	16500000	16600000	NA	NA
Total_exclusive	ATP3	11500000	5302400	NA	NA
Total_exclusive	PHO88	3813200	32200000	NA	NA
Total_exclusive	RFC3	3218200	2183200	NA	NA
Total_exclusive	YCF1	165070	1012100	NA	NA
Total_exclusive	OST1	8818900	11600000	NA	NA
Total_exclusive	VMA13	1448800	6027600	NA	NA
Total_exclusive	LOC1	42200000	60900000	NA	NA
Total_exclusive	ROK1	3329900	3907000	NA	NA
Total_exclusive	ARC1	6648600	5446300	NA	NA
Total_exclusive	HCH1	9637100	16400000	NA	NA
Total_exclusive	ERG5	3429200	3012300	NA	NA
Total_exclusive	RRB1	12200000	11200000	NA	NA
Total_exclusive	TSR1	2979400	3821900	NA	NA
Total_exclusive	NIP7	21600000	18700000	NA	NA
Total_exclusive	PUS1	2521100	2661600	NA	NA
Total_exclusive	DBP10	2188900	1183000	NA	NA
Total_exclusive	PIL1	7267000	10600000	NA	NA
Total_exclusive	ATP5	5020200	11000000	NA	NA
Total_exclusive	THR1	2631700	2739900	NA	NA
Total_exclusive	SRP54	3055100	1438500	NA	NA
Total_exclusive	SCL1	4997200	3276600	NA	NA
Total_exclusive	ERG4	1555000	10300000	NA	NA
Total_exclusive	CYS3	4399100	2658500	NA	NA
Total_exclusive	PRO3	9071500	9240500	NA	NA
Total_exclusive	LOS1	1550900	1463700	NA	NA
Total_exclusive	SQT1	22600000	15800000	NA	NA
Total_exclusive	MRPL4	8898800	8276100	NA	NA
Total_exclusive	GUA1	1394100	1492900	NA	NA
Total_exclusive	DED81	1967800	938000	NA	NA
Total_exclusive	LAA1	499530	155630	NA	NA
Total_exclusive	VAC8	5638400	5149200	NA	NA
Total_exclusive	RPN3	2235700	2441200	NA	NA
Total_exclusive	LCP5	3442700	3978900	NA	NA
Total_exclusive	RFC2	2202000	1930400	NA	NA
Total_exclusive	APS3	14000000	20700000	NA	NA
Total_exclusive	ENP2	3239500	3491000	NA	NA
Total_exclusive	YGR250C	536610	722150	NA	NA
Total_exclusive	CAF40	3436800	5187300	NA	NA
Total_exclusive	ERV25	4863500	21000000	NA	NA
Total_exclusive	EGD1	23300000	71300000	NA	NA
Total_exclusive	YDR341C	2021300	911010	NA	NA
Total_exclusive	RCL1	7619500	5047600	NA	NA
Total_exclusive	PPM2	1138400	1059300	NA	NA
Total_exclusive	NOP8	3084900	1906500	NA	NA
Total_exclusive	RPN8	4408200	9618300	NA	NA
Total_exclusive	ERG3	2231600	3147200	NA	NA
Total_exclusive	PUP3	11400000	20600000	NA	NA
Total_exclusive	SEC4	4445600	5501000	NA	NA
Total_exclusive	PRS3	2671400	2056300	NA	NA
Total_exclusive	TRP5	637490	926340	NA	NA
Total_exclusive	TPI1	14300000	7666800	NA	NA
Total_exclusive	VAR1	2046000	1353400	NA	NA
Total_exclusive	OPI3	4681700	10500000	NA	NA
Total_exclusive	ATP4	7852300	10700000	NA	NA
Total_exclusive	ARF1	11000000	5284000	NA	NA
Total_exclusive	VPS1	520370	777160	NA	NA
Total_exclusive	XRN1	316120	586600	NA	NA
Total_exclusive	GCD11	1497900	2682300	NA	NA
Total_exclusive	TSA1	12800000	11700000	NA	NA
Total_exclusive	MRPL24	7008200	7182000	NA	NA
Total_exclusive	MRPL40	8553900	7673500	NA	NA
Total_exclusive	REI1	3145400	6210800	NA	NA
Total_exclusive	DBP8	2494800	3347600	NA	NA
Total_exclusive	GEA2	576280	691280	NA	NA
Total_exclusive	SEC28	3679600	9399600	NA	NA
Total_exclusive	MKT1	621410	880310	NA	NA
Total_exclusive	ERG10	2464300	2368500	NA	NA
Total_exclusive	MON2	1112500	364890	NA	NA
Total_exclusive	PHB2	942470	18500000	NA	NA
Total_exclusive	ERG26	5130800	7372400	NA	NA
Total_exclusive	RIA1	608180	636710	NA	NA
Total_exclusive	NOP15	21200000	22400000	NA	NA
Total_exclusive	YVH1	1922800	4365100	NA	NA
Total_exclusive	REX4	4864400	5850500	NA	NA
Total_exclusive	TSC13	3474200	6462700	NA	NA
Total_exclusive	ODC2	4859600	3358400	NA	NA
Total_exclusive	SEC61	9807700	4019000	NA	NA
Total_exclusive	GPP1	6801500	10700000	NA	NA
Total_exclusive	HXK2	2057300	2358100	NA	NA
Total_exclusive	SES1	2474400	1924200	NA	NA
Total_exclusive	PET123	7570200	7642000	NA	NA
Total_exclusive	ACO1	2163400	666440	NA	NA
Total_exclusive	TKL1	2247300	1967000	NA	NA
Total_exclusive	SIS1	2566600	8183000	NA	NA
Total_exclusive	ERG9	3635700	2428700	NA	NA
Total_exclusive	HOM6	1826000	3071100	NA	NA
Total_exclusive	NHP2	19500000	108000000	NA	NA
Total_exclusive	MGM101	7413600	7927100	NA	NA
Total_exclusive	FRE1	1292700	3028200	NA	NA
Total_exclusive	MRPL6	7561700	4205400	NA	NA
Total_exclusive	WHI3	2642200	3273900	NA	NA
Total_exclusive	TOM20	7175100	11000000	NA	NA
Total_exclusive	PET10	2954700	5304600	NA	NA
Total_exclusive	YMC2	2514400	2760900	NA	NA
Total_exclusive	BFR1	1299600	305730	NA	NA
Total_exclusive	SCS2	11500000	14700000	NA	NA
Total_exclusive	SSM4	319680	956810	NA	NA
Total_exclusive	MRPL49	8231100	7593900	NA	NA
Total_exclusive	ERJ5	7286700	4565200	NA	NA
Total_exclusive	UBP3	723890	1119200	NA	NA
Total_exclusive	RKR1	727330	482010	NA	NA
Total_exclusive	EMG1	4886100	4590300	NA	NA
Total_exclusive	REH1	6300600	6774400	NA	NA
Total_exclusive	MTR10	654520	1433500	NA	NA
Total_exclusive	RPB3	1691900	4395400	NA	NA
Total_exclusive	PRP43	1183600	558620	NA	NA
Total_exclusive	SST2	650210	740110	NA	NA
Total_exclusive	POP2	4094700	2698100	NA	NA
Total_exclusive	PRE6	8596200	6431500	NA	NA
Total_exclusive	MCM7	208720	684690	NA	NA
Total_exclusive	RPS30B	162000000	128000000	NA	NA
Total_exclusive	RPL29	141000000	199000000	NA	NA
Total_exclusive	GND1	2186000	3197300	NA	NA
Total_exclusive	SSF1	3306400	2926000	NA	NA
Total_exclusive	CDC33	12500000	10300000	NA	NA
Total_exclusive	SAR1	7609800	7786500	NA	NA
Total_exclusive	PPH22	4011300	2098700	NA	NA
Total_exclusive	SCJ1	3257400	4688900	NA	NA
Total_exclusive	RML2	3161400	4560400	NA	NA
Total_exclusive	PTR2	3305700	3442000	NA	NA
Total_exclusive	LTV1	6191900	2716600	NA	NA
Total_exclusive	PTC3	3447300	4043300	NA	NA
Total_exclusive	MRPL11	5495000	3099800	NA	NA
Total_exclusive	PIM1	45513	225510	NA	NA
Total_exclusive	OTU2	30100000	39600000	NA	NA
Total_exclusive	ALA1	365890	731030	NA	NA
Total_exclusive	MRPS18	4814100	3012600	NA	NA
Total_exclusive	EMC2	860710	8078700	NA	NA
Total_exclusive	ERG25	11100000	11700000	NA	NA
Total_exclusive	NUM1	1956300	1880200	NA	NA
Total_exclusive	HMO1	14300000	9890500	NA	NA
Total_exclusive	PUF6	1550400	1632100	NA	NA
Total_exclusive	MRPL1	5488400	1852100	NA	NA
Total_exclusive	ARP9	2157200	2420000	NA	NA
Total_exclusive	LOA1	3277700	2682900	NA	NA
Total_exclusive	RRS1	16200000	21100000	NA	NA
Total_exclusive	NOP53	3222200	1460200	NA	NA
Total_exclusive	UTP23	5873000	11300000	NA	NA
Total_exclusive	CPR1	6870200	9420400	NA	NA
Total_exclusive	GLC7	3614100	5153200	NA	NA
Total_exclusive	SNU13	28100000	24500000	NA	NA
Total_exclusive	RFC4	992870	1889900	NA	NA
Total_exclusive	RSM25	1847400	2139200	NA	NA
Total_exclusive	LST8	2834900	2708500	NA	NA
Total_exclusive	YLR419W	262940	317390	NA	NA
Total_exclusive	KRR1	5354800	4380400	NA	NA
Total_exclusive	FAP7	3652800	2545300	NA	NA
Total_exclusive	SCS7	4053400	5625500	NA	NA
Total_exclusive	TRM732	1116200	1275100	NA	NA
Total_exclusive	RIO2	1449200	2575100	NA	NA
Total_exclusive	MET5	185770	883260	NA	NA
Total_exclusive	NSG1	4373900	7573200	NA	NA
Total_exclusive	RET2	3384600	2973700	NA	NA
Total_exclusive	RSM7	2869000	3120100	NA	NA
Total_exclusive	YPT1	3814700	3413100	NA	NA
Total_exclusive	CKA2	4388000	4717700	NA	NA
Total_exclusive	YCP4	2990200	8768800	NA	NA
Total_exclusive	ITR1	2506100	4867800	NA	NA
Total_exclusive	PRE4	3234200	8872800	NA	NA
Total_exclusive	IMP3	6291500	6056000	NA	NA
Total_exclusive	UTP11	1874000	2531600	NA	NA
Total_exclusive	NUP120	397970	1966000	NA	NA
Total_exclusive	MRPL15	7890700	8069600	NA	NA
Total_exclusive	RDH54	336370	273650	NA	NA
Total_exclusive	TAF5	553940	868520	NA	NA
Total_exclusive	KTR3	381410	4067500	NA	NA
Total_exclusive	RFC1	236070	437460	NA	NA
Total_exclusive	TRA1	58130	71909	NA	NA
Total_exclusive	LYS20	1778800	1932700	NA	NA
Total_exclusive	MRH4	1183700	948010	NA	NA
Total_exclusive	PXR1	3288100	2971900	NA	NA
Total_exclusive	ENA2	664280	1028000	NA	NA
Total_exclusive	MRD1	298010	300720	NA	NA
Total_exclusive	NOC4	2861500	2681400	NA	NA
Total_exclusive	YLR413W	1544800	4722900	NA	NA
Total_exclusive	GAS5	2555500	7118500	NA	NA
Total_exclusive	BUD21	5003300	2369000	NA	NA
Total_exclusive	APL5	351350	220480	NA	NA
Total_exclusive	GET4	692040	1451100	NA	NA
Total_exclusive	PST2	13100000	33700000	NA	NA
Total_exclusive	EFG1	4433200	5499400	NA	NA
Total_exclusive	NUP85	718980	1127900	NA	NA
Total_exclusive	ACL4	3237100	2788500	NA	NA
Total_exclusive	SSD1	783970	28400000	NA	NA
Total_exclusive	NAT1	1016200	1400600	NA	NA
Total_exclusive	RLF2	899620	715610	NA	NA
Total_exclusive	NOP16	11600000	8891000	NA	NA
Total_exclusive	CYC3	2955000	2235400	NA	NA
Total_exclusive	SUI2	2131300	1194000	NA	NA
Total_exclusive	RPB10	14300000	18600000	NA	NA
Total_exclusive	CDC10	494620	1107800	NA	NA
Total_exclusive	CTP1	1340700	1805600	NA	NA
Total_exclusive	RSM27	11100000	6944700	NA	NA
Total_exclusive	ATG33	6084900	8773400	NA	NA
Total_exclusive	LCB4	717700	663510	NA	NA
Total_exclusive	PDS5	6529.1	130610	NA	NA
Total_exclusive	RPL42A	15700000	13500000	NA	NA
Total_exclusive	MBF1	11100000	10200000	NA	NA
Total_exclusive	SEC65	3002300	3901400	NA	NA
Total_exclusive	YHR127W	1517600	2156900	NA	NA
Total_exclusive	GCD10	2681600	2454700	NA	NA
Total_exclusive	TAF6	1285300	1184800	NA	NA
Total_exclusive	VOA1	4935900	9391400	NA	NA
Total_exclusive	MRPL13	5170100	6222900	NA	NA
Total_exclusive	MHR1	5946200	4295400	NA	NA
Total_exclusive	FCF2	4407700	2412300	NA	NA
Total_exclusive	RPN6	1994100	3400300	NA	NA
Total_exclusive	CRG1	3202500	2185300	NA	NA
Total_exclusive	MLC1	3339000	2822400	NA	NA
Total_exclusive	RPN9	997660	2365700	NA	NA
Total_exclusive	NOP14	474260	783440	NA	NA
Total_exclusive	YOP1	1259100	4104300	NA	NA
Total_exclusive	GYP8	768160	313060	NA	NA
Total_exclusive	YGR266W	853880	1117000	NA	NA
Total_exclusive	COG8	391650	285140	NA	NA
Total_exclusive	RSM22	1084500	505880	NA	NA
Total_exclusive	VID22	466710	451120	NA	NA
Total_exclusive	RRP14	2400900	3473500	NA	NA
Total_exclusive	ERG20	779590	1190800	NA	NA
Total_exclusive	THR4	518600	980300	NA	NA
Total_exclusive	EXG1	725000	1280200	NA	NA
Total_exclusive	MRPL28	2143000	5026400	NA	NA
Total_exclusive	SHE4	501200	314430	NA	NA
Total_exclusive	YPT32	1462100	1389700	NA	NA
Total_exclusive	YNR040W	1167100	1881300	NA	NA
Total_exclusive	TIM50	3157000	1499100	NA	NA
Total_exclusive	RSN1	350560	416530	NA	NA
Total_exclusive	SAM3	2616400	3331900	NA	NA
Total_exclusive	YPQ1	3452700	2841200	NA	NA
Total_exclusive	NPA3	2458300	2181900	NA	NA
Total_exclusive	ARE2	1819500	3485000	NA	NA
Total_exclusive	YGR122W	863280	867170	NA	NA
Total_exclusive	RSC3	394870	345210	NA	NA
Total_exclusive	MRPL10	3380100	4228200	NA	NA
Total_exclusive	ORT1	682080	724600	NA	NA
Total_exclusive	RPN13	1499000	2402100	NA	NA
Total_exclusive	BUD22	1225800	1453600	NA	NA
Total_exclusive	ADE3	601110	409750	NA	NA
Total_exclusive	MRPL31	3636700	2806200	NA	NA
Total_exclusive	POL30	1281400	2083200	NA	NA
Total_exclusive	ERG6	1550100	1299400	NA	NA
Total_exclusive	ILV6	1779200	1671200	NA	NA
Total_exclusive	PEP3	151680	109280	NA	NA
Total_exclusive	MRPL9	3979300	4051800	NA	NA
Total_exclusive	NPL6	649240	539460	NA	NA
Total_exclusive	MRPL38	6388700	5144500	NA	NA
Total_exclusive	MRPL36	3300700	1750700	NA	NA
Total_exclusive	TIF5	407140	703190	NA	NA
Total_exclusive	DUN1	619190	357270	NA	NA
Total_exclusive	SAP185	706860	218180	NA	NA
Total_exclusive	PHO86	1196900	5014900	NA	NA
Total_exclusive	RET3	2549800	3888900	NA	NA
Total_exclusive	RPA49	963740	1622700	NA	NA
Total_exclusive	MRPL33	191000000	194000000	NA	NA
Total_exclusive	CAP1	1005500	1079700	NA	NA
Total_exclusive	NDI1	615260	378870	NA	NA
Total_exclusive	ECM1	2884300	2871100	NA	NA
Total_exclusive	MPM1	1695200	601410	NA	NA
Total_exclusive	YGR210C	1392400	1264300	NA	NA
Total_exclusive	SRP1	692300	724240	NA	NA
Total_exclusive	NAP1	3030200	3025600	NA	NA
Total_exclusive	ATP17	10900000	14600000	NA	NA
Total_exclusive	SEC15	239300	249070	NA	NA
Total_exclusive	SRP21	13300000	14500000	NA	NA
Total_exclusive	LSM2	2143000	1067900	NA	NA
Total_exclusive	UTP30	1245300	1278700	NA	NA
Total_exclusive	MRPL20	2386100	1910100	NA	NA
Detected_in_both	NAM7	244000000	301000000	3540000000	4170000000
Detected_in_both	RPL4A	6270000000	6620000000	6000000000	6590000000
Detected_in_both	RPS1A	3540000000	3560000000	5170000000	5370000000
Detected_in_both	RPL3	2590000000	2320000000	2700000000	2810000000
Detected_in_both	PMA1	1090000000	1510000000	2740000000	2380000000
Detected_in_both	FAS1	82800000	137000000	130000000	117000000
Detected_in_both	TY1B-ML2	68700000	64800000	321000000	248000000
Detected_in_both	FAS2	56200000	88500000	65000000	51000000
Detected_in_both	URA2	23300000	28500000	80800000	78400000
Detected_in_both	ASC1	2720000000	2960000000	2950000000	2870000000
Detected_in_both	EFT1	149000000	132000000	291000000	181000000
Detected_in_both	GCN1	14900000	14600000	30700000	30300000
Detected_in_both	YHR020W	217000000	182000000	692000000	631000000
Detected_in_both	RPS4A	2440000000	2460000000	1980000000	2800000000
Detected_in_both	CDC19	466000000	449000000	1470000000	1710000000
Detected_in_both	RPL8B	3600000000	4070000000	4710000000	3770000000
Detected_in_both	DED1	266000000	285000000	694000000	666000000
Detected_in_both	RPS3	3430000000	3950000000	4180000000	4390000000
Detected_in_both	SSA2	365000000	346000000	174000000	201000000
Detected_in_both	PDC1	514000000	441000000	1250000000	1180000000
Detected_in_both	ARO1	42300000	25900000	129000000	91200000
Detected_in_both	RPL5	3360000000	3690000000	3240000000	3850000000
Detected_in_both	RPL12A	5760000000	6210000000	3610000000	2960000000
Detected_in_both	YEF3	101000000	104000000	203000000	177000000
Detected_in_both	RPL23A	4600000000	4440000000	2860000000	3070000000
Detected_in_both	TDH3	401000000	408000000	1390000000	1280000000
Detected_in_both	VMA2	146000000	136000000	598000000	508000000
Detected_in_both	KAP123	103000000	93800000	268000000	258000000
Detected_in_both	PFK1	51800000	58300000	145000000	125000000
Detected_in_both	RPL7A	4230000000	4060000000	5400000000	5020000000
Detected_in_both	UTP10	20200000	15400000	43300000	38000000
Detected_in_both	LEU2	631000000	750000000	2520000000	3720000000
Detected_in_both	RPL1A	3310000000	2730000000	3530000000	1940000000
Detected_in_both	RPL10	1350000000	1500000000	2070000000	1130000000
Detected_in_both	TEF1	1200000000	1300000000	2830000000	2790000000
Detected_in_both	RPP0	5180000000	4750000000	6230000000	6070000000
Detected_in_both	SSB1	414000000	416000000	292000000	227000000
Detected_in_both	NOP1	403000000	346000000	685000000	734000000
Detected_in_both	RPS6B	2640000000	3280000000	3950000000	4010000000
Detected_in_both	RPS14B	2410000000	2530000000	2450000000	2540000000
Detected_in_both	FKS1	21600000	39700000	63600000	46000000
Detected_in_both	GFA1	61200000	50900000	198000000	120000000
Detected_in_both	RPS0B	4600000000	4310000000	7070000000	5070000000
Detected_in_both	ENO2	133000000	135000000	235000000	165000000
Detected_in_both	MES1	56300000	45800000	163000000	124000000
Detected_in_both	ATP2	180000000	195000000	416000000	505000000
Detected_in_both	RPL2B	3490000000	2730000000	3070000000	3770000000
Detected_in_both	RPS18A	4650000000	4490000000	4530000000	4530000000
Detected_in_both	RPS2	2720000000	3000000000	2110000000	2710000000
Detected_in_both	RPL16B	1900000000	1920000000	2100000000	2250000000
Detected_in_both	RPL6B	3330000000	3220000000	2820000000	2810000000
Detected_in_both	RPL9A	3400000000	2880000000	2420000000	2610000000
Detected_in_both	RPL28	5670000000	4470000000	4630000000	3910000000
Detected_in_both	RPS5	4330000000	4430000000	5380000000	5790000000
Detected_in_both	RPG1	16300000	21200000	50900000	48000000
Detected_in_both	NUG1	127000000	102000000	186000000	157000000
Detected_in_both	RPL6A	3870000000	3750000000	2800000000	3660000000
Detected_in_both	RPL17A	4620000000	4640000000	4750000000	2950000000
Detected_in_both	RRP12	21300000	19700000	42500000	45800000
Detected_in_both	MIR1	271000000	260000000	786000000	884000000
Detected_in_both	RPL20B	4010000000	4090000000	2710000000	2670000000
Detected_in_both	NOP56	116000000	110000000	320000000	257000000
Detected_in_both	RPS13	3070000000	3610000000	4000000000	4120000000
Detected_in_both	CRM1	20300000	17800000	84300000	64500000
Detected_in_both	VMA1	19700000	26300000	65100000	55200000
Detected_in_both	RPS17A	5490000000	5360000000	4280000000	5390000000
Detected_in_both	RPS24A	2350000000	2350000000	2010000000	2730000000
Detected_in_both	NOG1	91500000	78900000	242000000	227000000
Detected_in_both	ILV2	43700000	54300000	163000000	207000000
Detected_in_both	RPL25	3180000000	2910000000	2600000000	4110000000
Detected_in_both	RPS9B	2230000000	2320000000	1680000000	2630000000
Detected_in_both	ATP1	98700000	107000000	287000000	211000000
Detected_in_both	HSC82	53200000	59000000	78100000	91900000
Detected_in_both	URA7	36500000	35800000	125000000	102000000
Detected_in_both	RPS22A	2460000000	2480000000	1170000000	1760000000
Detected_in_both	RPS7A	2210000000	2700000000	2380000000	2330000000
Detected_in_both	SAM1	150000000	152000000	607000000	434000000
Detected_in_both	APA1	174000000	233000000	468000000	373000000
Detected_in_both	ACC1	6094600	7784200	7653900	8635500
Detected_in_both	RPS8B	3260000000	3100000000	2470000000	2460000000
Detected_in_both	RPL16A	1370000000	1380000000	1650000000	1830000000
Detected_in_both	NOG2	45300000	44100000	144000000	107000000
Detected_in_both	RPS19A	2030000000	1940000000	909000000	1400000000
Detected_in_both	RPL11A	3150000000	2640000000	3250000000	3480000000
Detected_in_both	RPL26B	2760000000	2010000000	4260000000	3240000000
Detected_in_both	RPL15A	4660000000	4230000000	3470000000	3490000000
Detected_in_both	RPS7B	1270000000	1280000000	1200000000	1380000000
Detected_in_both	RPS12	3720000000	4030000000	2460000000	2680000000
Detected_in_both	RPL14B	2660000000	3120000000	2740000000	2780000000
Detected_in_both	RPL13B	2440000000	3730000000	2940000000	4440000000
Detected_in_both	UPF3	196000000	206000000	618000000	482000000
Detected_in_both	RPS31	908000000	736000000	972000000	879000000
Detected_in_both	RPL24B	3190000000	3130000000	3620000000	3450000000
Detected_in_both	MAE1	39800000	37100000	118000000	108000000
Detected_in_both	CDC39	7176300	3972700	11300000	6300900
Detected_in_both	RPS21B	1290000000	1540000000	810000000	544000000
Detected_in_both	OLA1	93100000	80800000	204000000	106000000
Detected_in_both	NMD2	3122900	7890600	48300000	84700000
Detected_in_both	RPL35B	4420000000	4580000000	2920000000	3250000000
Detected_in_both	DBP3	51200000	38000000	100000000	115000000
Detected_in_both	CCT8	36300000	35100000	123000000	87400000
Detected_in_both	RPS11B	2820000000	3080000000	2670000000	1980000000
Detected_in_both	RPL19B	4710000000	4180000000	4950000000	4820000000
Detected_in_both	ENP1	36000000	29900000	86900000	102000000
Detected_in_both	SRP68	41600000	31100000	87100000	76500000
Detected_in_both	UTP20	3318200	2707800	3384200	5302700
Detected_in_both	YHB1	103000000	82100000	336000000	298000000
Detected_in_both	RPB2	7102900	5733200	34900000	32300000
Detected_in_both	RPS20	2510000000	2830000000	1820000000	2320000000
Detected_in_both	NOP7	87300000	87600000	10900000	38000000
Detected_in_both	TUB2	90800000	94200000	333000000	350000000
Detected_in_both	ACT1	67000000	52700000	193000000	724000000
Detected_in_both	RPS15	1620000000	1530000000	1200000000	1940000000
Detected_in_both	CBF5	145000000	147000000	8592200	10400000
Detected_in_both	RPL38	2300000000	2350000000	361000000	230000000
Detected_in_both	RPL31A	3500000000	1790000000	2240000000	2240000000
Detected_in_both	SRP72	33000000	28900000	44400000	40100000
Detected_in_both	ERB1	60100000	53400000	13500000	18200000
Detected_in_both	NOP58	72400000	65300000	99900000	104000000
Detected_in_both	PET9	99200000	107000000	158000000	248000000
Detected_in_both	KRE33	15100000	14700000	3425200	9154300
Detected_in_both	HXT3	28600000	36900000	118000000	27600000
Detected_in_both	GCD6	18300000	15100000	47200000	36100000
Detected_in_both	RPS16B	2550000000	2600000000	1480000000	1540000000
Detected_in_both	GPM1	158000000	215000000	247000000	341000000
Detected_in_both	CCT4	33800000	19000000	90200000	71000000
Detected_in_both	RPL21A	2990000000	4660000000	2920000000	1320000000
Detected_in_both	NIP1	17400000	14500000	56200000	41200000
Detected_in_both	KAP95	35700000	44400000	143000000	66800000
Detected_in_both	GLT1	4173300	2645000	13400000	5513100
Detected_in_both	RPC40	41200000	40000000	129000000	107000000
Detected_in_both	HSP60	44300000	50500000	24100000	18000000
Detected_in_both	SDA1	18900000	15700000	41800000	35500000
Detected_in_both	MAK21	21100000	20300000	1690300	1439100
Detected_in_both	RPL22A	2210000000	1780000000	990000000	801000000
Detected_in_both	SEC27	14000000	17000000	28100000	11400000
Detected_in_both	NMD3	100000000	74500000	20000000	4480200
Detected_in_both	POL5	7483200	7749500	21000000	14800000
Detected_in_both	CDC48	15500000	20700000	9848600	16100000
Detected_in_both	IDH1	66100000	50600000	225000000	190000000
Detected_in_both	GRS1	10700000	11200000	31500000	23600000
Detected_in_both	GUS1	11500000	16400000	11100000	6974700
Detected_in_both	RPL36B	3340000000	3000000000	2540000000	2640000000
Detected_in_both	ADH1	169000000	141000000	362000000	374000000
Detected_in_both	RPL27A	3260000000	3140000000	4000000000	3040000000
Detected_in_both	URB1	2919600	3136600	12500000	5220200
Detected_in_both	TUB3	56800000	36300000	198000000	205000000
Detected_in_both	RPL30	2230000000	1730000000	1310000000	1050000000
Detected_in_both	VPH1	8228300	49700000	14800000	4749000
Detected_in_both	PDR5	8368000	12400000	12400000	9987900
Detected_in_both	RPN1	5908300	7858900	8118200	11000000
Detected_in_both	PSA1	39500000	42400000	92300000	42800000
Detected_in_both	HAS1	52300000	41700000	13900000	11700000
Detected_in_both	RVB1	38100000	34100000	39400000	18200000
Detected_in_both	SEC63	11100000	27900000	23200000	15400000
Detected_in_both	CCT6	17900000	17500000	26000000	44800000
Detected_in_both	PRT1	16800000	13200000	17500000	19400000
Detected_in_both	RPS23B	1020000000	1090000000	886000000	912000000
Detected_in_both	RPL18A	1500000000	1530000000	1880000000	1720000000
Detected_in_both	NAN1	17100000	13000000	34100000	24200000
Detected_in_both	SXM1	11500000	12700000	30900000	29400000
Detected_in_both	TOM70	11700000	14400000	12700000	23800000
Detected_in_both	PFK2	10300000	12600000	9392800	3863600
Detected_in_both	MIC60	7906200	12700000	35200000	28100000
Detected_in_both	FAA4	26000000	17500000	51500000	49200000
Detected_in_both	RPL33A	2120000000	2030000000	1970000000	1970000000
Detected_in_both	TEF4	58700000	52800000	165000000	106000000
Detected_in_both	PGK1	46300000	58300000	22200000	15000000
Detected_in_both	HMG1	7792400	12800000	24300000	18800000
Detected_in_both	RPA135	3854000	3850700	17700000	4055800
Detected_in_both	MRT4	151000000	172000000	32100000	37000000
Detected_in_both	CIC1	47300000	52200000	23600000	32200000
Detected_in_both	RIX7	7204600	7873500	11400000	3857400
Detected_in_both	PSE1	10300000	11500000	25800000	36300000
Detected_in_both	RPL32	1880000000	1790000000	1170000000	1120000000
Detected_in_both	MET10	5001300	3918200	15300000	4403900
Detected_in_both	RNA1	23700000	26200000	56400000	74500000
Detected_in_both	IDH2	64600000	55000000	301000000	252000000
Detected_in_both	SEC7	2969700	1588700	5809500	2180600
Detected_in_both	NOP9	7872100	7983300	17200000	17700000
Detected_in_both	COP1	5430900	6017900	4314500	2077200
Detected_in_both	PDR12	3679800	5712500	3596800	3014100
Detected_in_both	MDN1	432050	593920	923160	542900
Detected_in_both	GCD1	14600000	9003400	19000000	20200000
Detected_in_both	FBA1	57900000	56000000	80500000	66800000
Detected_in_both	VMA6	31400000	77400000	91400000	28700000
Detected_in_both	LCB2	13600000	14600000	71300000	68300000
Detected_in_both	NMD5	2919900	5070000	22000000	16800000
Detected_in_both	BCP1	42700000	35700000	75200000	50700000
Detected_in_both	TRP3	12700000	10100000	39800000	34700000
Detected_in_both	TIF1	25500000	29500000	43600000	50100000
Detected_in_both	CHC1	3072600	3826300	2694600	3074100
Detected_in_both	PWP2	5227600	5379000	8525200	1814400
Detected_in_both	RPT1	8641700	9829200	29300000	38100000
Detected_in_both	RRP3	14100000	14600000	39800000	27600000
Detected_in_both	GGC1	19500000	35200000	78500000	130000000
Detected_in_both	SAH1	29700000	24800000	59200000	31300000
Detected_in_both	UTP8	10800000	11900000	12900000	11600000
Detected_in_both	RPP2B	996000000	808000000	108000000	137000000
Detected_in_both	CPA2	4248300	4548300	9848400	10400000
Detected_in_both	SRO9	28300000	36900000	14000000	23500000
Detected_in_both	MAK5	9438500	7165700	7498800	10100000
Detected_in_both	MCM6	2366800	2226800	7830600	5669300
Detected_in_both	UTP15	16400000	14200000	14800000	18300000
Detected_in_both	PAB1	11000000	13900000	26500000	9625100
Detected_in_both	TUB1	66700000	35300000	190000000	224000000
Detected_in_both	RET1	3290200	2069300	4872400	3515700
Detected_in_both	NSR1	40400000	48700000	31000000	55800000
Detected_in_both	NOP4	10700000	10800000	5850600	4222400
Detected_in_both	RSM23	11200000	7511600	19200000	8298100
Detected_in_both	RPS28A	1630000000	1910000000	744000000	768000000
Detected_in_both	MSS51	9461100	10300000	13400000	31500000
Detected_in_both	GCD7	26600000	20200000	79400000	37600000
Detected_in_both	CCT3	10500000	11800000	13500000	13400000
Detected_in_both	YHM2	57600000	65200000	206000000	214000000
Detected_in_both	ERG27	21000000	19600000	53700000	106000000
Detected_in_both	RPL43B	925000000	826000000	497000000	452000000
Detected_in_both	TIF34	15600000	15600000	37300000	28000000
Detected_in_both	ACS2	11000000	9818800	77000000	24000000
Detected_in_both	UTP13	8385200	8761100	10900000	4181600
Detected_in_both	UTP21	5857900	7601000	3031400	9416200
Detected_in_both	TCB1	5239500	5142500	6931500	5918400
Detected_in_both	LEU1	3850000	5456800	22100000	29700000
Detected_in_both	KAP104	10900000	8404300	35600000	22000000
Detected_in_both	MCX1	4179500	3754000	27400000	20100000
Detected_in_both	TRM5	8180000	6867000	11700000	18100000
Detected_in_both	CCT5	8386100	8406300	27600000	28100000
Detected_in_both	SEC13	27100000	22900000	42200000	11700000
Detected_in_both	HHF1	325000000	144000000	1800000000	917000000
Detected_in_both	THS1	4383600	4379900	9902800	2156800
Detected_in_both	RPS25B	1210000000	1070000000	845000000	942000000
Detected_in_both	GCD2	15400000	16600000	42600000	32200000
Detected_in_both	NAM9	5047700	5006800	12700000	5626200
Detected_in_both	ECM29	1394500	1368900	1691800	686710
Detected_in_both	SEC26	6451200	5411500	11800000	4111300
Detected_in_both	RPT6	12000000	12300000	39100000	61700000
Detected_in_both	ILS1	2052800	1659200	4817000	1828300
Detected_in_both	HEM1	12200000	7710600	19200000	17600000
Detected_in_both	ERG11	17200000	18900000	21700000	12400000
Detected_in_both	SUP45	4764300	5924600	29300000	11000000
Detected_in_both	PGI1	13100000	14200000	21400000	8741200
Detected_in_both	LCB1	14500000	12600000	36100000	33000000
Detected_in_both	RPT3	6745100	10700000	34600000	37200000
Detected_in_both	SPF1	1775100	3891500	2166100	4984800
Detected_in_both	CCT7	8619600	4183500	18800000	7009600
Detected_in_both	SDH1	8428300	8507800	27200000	22300000
Detected_in_both	REP1	13900000	8294100	51100000	12400000
Detected_in_both	MCM4	3209300	1305700	11400000	6807100
Detected_in_both	RPT5	7881300	9411500	7845900	15000000
Detected_in_both	SSZ1	5657400	7487000	6642500	6092900
Detected_in_both	UTP9	15300000	6945400	5654200	6584100
Detected_in_both	MSN5	1022400	1077400	2397500	1441400
Detected_in_both	MRP51	9853200	8799500	13400000	5363000
Detected_in_both	RMT2	20000000	14500000	48100000	40400000
Detected_in_both	RVB2	12000000	11800000	2129000	2360400
Detected_in_both	TIF4631	3848100	4567900	10900000	8028600
Detected_in_both	SEC18	2406800	3657500	19300000	32400000
Detected_in_both	OAC1	20400000	26900000	50800000	46300000
Detected_in_both	RRP8	7005700	11500000	35400000	44000000
Detected_in_both	PGA3	11600000	18900000	41100000	36700000
Detected_in_both	KAR2	39300000	32600000	38600000	48100000
Detected_in_both	RPS27A	4220000000	4010000000	1790000000	2050000000
Detected_in_both	RPS26B	2040000000	2190000000	2240000000	2140000000
Detected_in_both	EMW1	2743500	1639900	4494500	2527700
Detected_in_both	TCB2	2072300	3811400	5219300	4983100
Detected_in_both	FPR4	70900000	60600000	41300000	61800000
Detected_in_both	RPS10A	1760000000	1550000000	937000000	991000000
Detected_in_both	SAS10	9316100	12500000	2231200	4950100
Detected_in_both	TIF6	309000000	256000000	295000000	247000000
Detected_in_both	GCN3	15000000	11300000	48600000	26700000
Detected_in_both	BMH1	19200000	24200000	53100000	92000000
Detected_in_both	RLP7	94100000	61100000	22100000	25700000
Detected_in_both	ALD6	8945300	5451300	25000000	7614900
Detected_in_both	PAA1	41600000	35100000	51700000	55000000
Detected_in_both	RPP2A	340000000	296000000	33200000	139000000
Detected_in_both	MET6	2868600	2712500	5197700	2704800
Detected_in_both	SEC53	6968800	8905000	21400000	20500000
Detected_in_both	STT4	1119100	548200	2000200	1064600
Detected_in_both	RPT2	9334200	10700000	13000000	8564300
Detected_in_both	NOC3	6853400	7943500	3983600	2209200
Detected_in_both	ETT1	22900000	21800000	72700000	57200000
Detected_in_both	TRP2	5351600	5554700	8452700	6900800
Detected_in_both	CHO2	3588100	3432900	9862000	8428000
Detected_in_both	DPM1	11800000	15300000	43000000	31200000
Detected_in_both	SEC23	3511500	2802000	3266500	3183500
Detected_in_both	MRPS28	13800000	13400000	22100000	15500000
Detected_in_both	CYS4	4804700	5407400	3622600	3315000
Detected_in_both	EDC3	2487100	1943800	29600000	12000000
Detected_in_both	MET18	1344200	1861000	5477600	1971400
Detected_in_both	RPT4	5931100	7105000	34000000	31500000
Detected_in_both	KAP120	2283900	1033400	5420200	4980700
Detected_in_both	SYO1	11500000	8623000	19500000	20000000
Detected_in_both	RPL39	2000000000	2550000000	1610000000	1540000000
Detected_in_both	KRS1	6957200	6716300	15600000	3544300
Detected_in_both	HXT2	11700000	11600000	10400000	16700000
Detected_in_both	SLC1	11400000	10400000	16000000	28800000
Detected_in_both	RPL34B	1650000000	1470000000	1420000000	1370000000
Detected_in_both	YNR021W	7652600	17800000	15100000	26000000
Detected_in_both	ERG13	7493700	8044000	34700000	14300000
Detected_in_both	MRN1	3046400	5714200	16200000	15600000
Detected_in_both	ILV5	9531400	9465500	13300000	10200000
Detected_in_both	SPB4	4426700	2183100	18100000	3068500
Detected_in_both	PUP2	10100000	9455300	20800000	16300000
Detected_in_both	SSH1	19000000	20200000	25500000	36200000
Detected_in_both	MRPS35	9324200	9899400	6913200	7206400
Detected_in_both	PNO1	13900000	16100000	20300000	28200000
Detected_in_both	CSE1	3123200	2979100	3274600	8297700
Detected_in_both	WBP1	4736100	22000000	17400000	9089100
Detected_in_both	UBA4	4923700	3298200	10400000	11500000
Detected_in_both	PRE5	16600000	10900000	20700000	37800000
Detected_in_both	DOP1	1253800	456650	1757400	1060600
Detected_in_both	ILV1	2391800	2065900	15300000	16800000
Detected_in_both	CTR86	2799000	1536200	4598700	2125100
Detected_in_both	MCM5	2747300	2024200	6143400	3764400
Detected_in_both	ERG1	7412000	5750600	12800000	13100000
Detected_in_both	CBR1	3847800	16700000	4676600	5459400
Detected_in_both	NAB6	2073500	904190	5107600	4029900
Detected_in_both	CEX1	2979800	2054500	6887400	5168500
Detected_in_both	RPL22B	612000000	339000000	107000000	270000000
Detected_in_both	CDC28	3736300	8827400	14000000	8892200
Detected_in_both	MET17	3824700	3230900	14400000	3825300
Detected_in_both	CHA1	7113000	5801500	10600000	14400000
Detected_in_both	MRPS9	15500000	15300000	22900000	14000000
Detected_in_both	OSH3	916600	951770	4742900	1307100
Detected_in_both	TIF35	12000000	14300000	9272500	13700000
Detected_in_both	TYW1	1829500	2317000	2870600	1033100
Detected_in_both	COX2	18500000	85100000	26000000	44400000
Detected_in_both	RCM1	3489900	2757300	9333800	8448500
Detected_in_both	ELP3	3408600	3602800	3862100	5466500
Detected_in_both	RSM24	7221500	8547000	8767100	6873400
Detected_in_both	GSF2	7192000	6306400	4949000	4986700
Detected_in_both	YMR310C	6234800	4513400	10400000	7692000
Detected_in_both	RIM2	7978200	6076300	18900000	13700000
Detected_in_both	DIM1	8463900	6018700	9910900	7915400
Detected_in_both	UTP5	6707000	2839000	7874000	15900000
Detected_in_both	GSP1	9433400	13900000	22200000	14500000
Detected_in_both	LYS4	496010	512640	698900	7182200
Detected_in_both	PUF4	1415000	1210300	9210100	6096800
Detected_in_both	ELO2	19300000	28300000	74500000	73700000
Detected_in_both	YBP2	2156600	462460	5250100	3320300
Detected_in_both	MCM2	496040	673580	1171600	729940
Detected_in_both	HTZ1	32500000	25400000	794000000	549000000

## Sheet: UPF1-FLAG
Detection	Protein	Total_1	Total_2	Total_3	IP_1	IP_2	IP_3
IP_exclusive	FET4	NA	NA	NA	68631000	0	361150000
Total_exclusive	TY1B-LR2	252800000	300070000	313690000	NA	NA	NA
Total_exclusive	RPL43B	1204100000	2395900000	1554800000	NA	NA	NA
Total_exclusive	GCN1	40122000	39211000	41374000	NA	NA	NA
Total_exclusive	ACC1	36657000	30443000	36161000	NA	NA	NA
Total_exclusive	MDN1	8282900	5965000	7699500	NA	NA	NA
Total_exclusive	RPS10A	2376300000	4454400000	3371400000	NA	NA	NA
Total_exclusive	FKS1	71326000	67922000	78286000	NA	NA	NA
Total_exclusive	PFK1	115760000	89113000	105260000	NA	NA	NA
Total_exclusive	RPG1	63450000	48269000	62529000	NA	NA	NA
Total_exclusive	RPL36B	5551600000	5503600000	5374600000	NA	NA	NA
Total_exclusive	RPL31A	10240000000	6676100000	7391500000	NA	NA	NA
Total_exclusive	UTP20	11688000	8092400	7512400	NA	NA	NA
Total_exclusive	DBP2	238080000	184580000	184860000	NA	NA	NA
Total_exclusive	HSC82	129460000	122060000	140440000	NA	NA	NA
Total_exclusive	PDA1	267160000	147460000	184480000	NA	NA	NA
Total_exclusive	YDJ1	340500000	448570000	396860000	NA	NA	NA
Total_exclusive	UTP10	29409000	18778000	19562000	NA	NA	NA
Total_exclusive	TY2B-C	36678000	68268000	32067000	NA	NA	NA
Total_exclusive	GLT1	16774000	12158000	13621000	NA	NA	NA
Total_exclusive	CLU1	21550000	16961000	24447000	NA	NA	NA
Total_exclusive	RRP12	41394000	55502000	56454000	NA	NA	NA
Total_exclusive	CDC39	11533000	7322800	8987000	NA	NA	NA
Total_exclusive	PDR5	49078000	3420000	6959000	NA	NA	NA
Total_exclusive	HSP60	133440000	131620000	162390000	NA	NA	NA
Total_exclusive	NUG1	201060000	186330000	179410000	NA	NA	NA
Total_exclusive	STM1	345620000	901440000	710580000	NA	NA	NA
Total_exclusive	CDC48	47678000	44435000	56028000	NA	NA	NA
Total_exclusive	ERB1	120030000	105000000	99607000	NA	NA	NA
Total_exclusive	SEC7	11824000	6502500	7372500	NA	NA	NA
Total_exclusive	RPL38	5836000000	5182000000	4225300000	NA	NA	NA
Total_exclusive	NOP7	166590000	110610000	144200000	NA	NA	NA
Total_exclusive	CRM1	54394000	37131000	40165000	NA	NA	NA
Total_exclusive	HYP2	833850000	494120000	422990000	NA	NA	NA
Total_exclusive	COP1	28027000	15669000	24062000	NA	NA	NA
Total_exclusive	NIP1	58348000	38962000	48817000	NA	NA	NA
Total_exclusive	MYO2	9293600	5582700	6621000	NA	NA	NA
Total_exclusive	SRP68	77065000	48993000	52247000	NA	NA	NA
Total_exclusive	PRT1	48260000	32095000	51550000	NA	NA	NA
Total_exclusive	NMD3	145030000	101980000	106750000	NA	NA	NA
Total_exclusive	PFK2	33271000	25152000	38022000	NA	NA	NA
Total_exclusive	GRS1	31342000	23082000	28242000	NA	NA	NA
Total_exclusive	CCT8	76652000	70840000	84062000	NA	NA	NA
Total_exclusive	DBP3	105320000	139620000	133000000	NA	NA	NA
Total_exclusive	TOM70	56026000	42248000	43942000	NA	NA	NA
Total_exclusive	SEC27	28483000	32554000	35915000	NA	NA	NA
Total_exclusive	FAA4	106370000	81237000	79103000	NA	NA	NA
Total_exclusive	PGK1	119480000	137180000	132250000	NA	NA	NA
Total_exclusive	CBF5	138180000	165850000	178310000	NA	NA	NA
Total_exclusive	POR1	298330000	144410000	408020000	NA	NA	NA
Total_exclusive	RRP5	7864300	8156000	9176500	NA	NA	NA
Total_exclusive	TY1A-DR2	183760000	51670000	56850000	NA	NA	NA
Total_exclusive	NSR1	122040000	251780000	255660000	NA	NA	NA
Total_exclusive	NOP58	79927000	157800000	173900000	NA	NA	NA
Total_exclusive	RVB1	80193000	90271000	91135000	NA	NA	NA
Total_exclusive	PAB1	82775000	103210000	111040000	NA	NA	NA
Total_exclusive	MRT4	279040000	184220000	224570000	NA	NA	NA
Total_exclusive	CCT4	67944000	56294000	65594000	NA	NA	NA
Total_exclusive	KAP95	74598000	70299000	52238000	NA	NA	NA
Total_exclusive	VPH1	46646000	60282000	82098000	NA	NA	NA
Total_exclusive	NEW1	10086000	6550200	12648000	NA	NA	NA
Total_exclusive	CHC1	7675400	4522700	8556200	NA	NA	NA
Total_exclusive	RPN2	20884000	13593000	19392000	NA	NA	NA
Total_exclusive	NAN1	40135000	41422000	38738000	NA	NA	NA
Total_exclusive	ECM29	5113200	3140300	3731500	NA	NA	NA
Total_exclusive	MET10	18869000	8323500	8596200	NA	NA	NA
Total_exclusive	KRE33	17811000	14957000	14042000	NA	NA	NA
Total_exclusive	RPN1	21679000	16863000	16301000	NA	NA	NA
Total_exclusive	SRO9	83737000	125980000	129500000	NA	NA	NA
Total_exclusive	SEC26	33386000	21246000	29662000	NA	NA	NA
Total_exclusive	TIF4631	13298000	32538000	31949000	NA	NA	NA
Total_exclusive	FAA1	49273000	33093000	34758000	NA	NA	NA
Total_exclusive	ARX1	81349000	69019000	65532000	NA	NA	NA
Total_exclusive	GCD6	39819000	19373000	22517000	NA	NA	NA
Total_exclusive	MSS116	37404000	30710000	30814000	NA	NA	NA
Total_exclusive	NUP192	8690100	3753300	4305500	NA	NA	NA
Total_exclusive	HAS1	76774000	74341000	86471000	NA	NA	NA
Total_exclusive	YTM1	97748000	90596000	83762000	NA	NA	NA
Total_exclusive	PSE1	20754000	24103000	25156000	NA	NA	NA
Total_exclusive	ENP1	50007000	61668000	54940000	NA	NA	NA
Total_exclusive	SEC18	27913000	19366000	17789000	NA	NA	NA
Total_exclusive	SRP72	59814000	36543000	34992000	NA	NA	NA
Total_exclusive	RPA135	10285000	7060100	8342300	NA	NA	NA
Total_exclusive	KAR2	141880000	110470000	119430000	NA	NA	NA
Total_exclusive	SCP160	61908000	31615000	41847000	NA	NA	NA
Total_exclusive	MAK21	24122000	22499000	25148000	NA	NA	NA
Total_exclusive	SAC1	33050000	25974000	37076000	NA	NA	NA
Total_exclusive	SUP45	60059000	51510000	48649000	NA	NA	NA
Total_exclusive	ILV1	26822000	37559000	51350000	NA	NA	NA
Total_exclusive	RPT5	35319000	19793000	17792000	NA	NA	NA
Total_exclusive	TRM3	5930500	2090700	4169800	NA	NA	NA
Total_exclusive	POL5	19227000	18024000	23068000	NA	NA	NA
Total_exclusive	TCP1	26232000	23749000	39640000	NA	NA	NA
Total_exclusive	FBA1	149460000	133760000	122700000	NA	NA	NA
Total_exclusive	PDB1	562040000	540420000	484850000	NA	NA	NA
Total_exclusive	HMG1	31859000	28437000	27668000	NA	NA	NA
Total_exclusive	RPB2	14655000	8176600	10449000	NA	NA	NA
Total_exclusive	TRM1	49984000	34205000	36716000	NA	NA	NA
Total_exclusive	OLE1	49560000	44572000	47090000	NA	NA	NA
Total_exclusive	RPC40	91505000	71480000	79912000	NA	NA	NA
Total_exclusive	SEC63	47871000	30324000	32118000	NA	NA	NA
Total_exclusive	MIC60	42890000	24961000	28041000	NA	NA	NA
Total_exclusive	IKI3	7997900	7564900	8381300	NA	NA	NA
Total_exclusive	CPA2	9083400	15305000	20156000	NA	NA	NA
Total_exclusive	SKI3	6067100	1816500	2859000	NA	NA	NA
Total_exclusive	DOP1	4380900	2458100	2796900	NA	NA	NA
Total_exclusive	URB1	4561500	5989300	5687700	NA	NA	NA
Total_exclusive	NOP4	33515000	31777000	36027000	NA	NA	NA
Total_exclusive	NUP170	8112000	4712300	5546400	NA	NA	NA
Total_exclusive	SEC21	19199000	32031000	20836000	NA	NA	NA
Total_exclusive	CCT7	38238000	30838000	38109000	NA	NA	NA
Total_exclusive	CCT5	42829000	25445000	38154000	NA	NA	NA
Total_exclusive	CCT6	39388000	26451000	37480000	NA	NA	NA
Total_exclusive	RPS26A	3892100000	3952500000	5072900000	NA	NA	NA
Total_exclusive	RPT1	39380000	32134000	35900000	NA	NA	NA
Total_exclusive	ARC1	96548000	112090000	142700000	NA	NA	NA
Total_exclusive	TUB3	92884000	66501000	82154000	NA	NA	NA
Total_exclusive	FUN12	17430000	17287000	22336000	NA	NA	NA
Total_exclusive	UTP22	11671000	8340800	8196500	NA	NA	NA
Total_exclusive	RPT3	53686000	24798000	27010000	NA	NA	NA
Total_exclusive	HXT3	17044000	16915000	19843000	NA	NA	NA
Total_exclusive	NUM1	5226100	8980700	6813800	NA	NA	NA
Total_exclusive	SSC1	46326000	38659000	43076000	NA	NA	NA
Total_exclusive	RBG1	114170000	106800000	106610000	NA	NA	NA
Total_exclusive	VAS1	9964100	5684000	6551800	NA	NA	NA
Total_exclusive	ARB1	53932000	43552000	32342000	NA	NA	NA
Total_exclusive	TIF34	75054000	56073000	73828000	NA	NA	NA
Total_exclusive	LPD1	65377000	29465000	26195000	NA	NA	NA
Total_exclusive	CYS4	17051000	20785000	32079000	NA	NA	NA
Total_exclusive	ILS1	8191900	4245000	5383800	NA	NA	NA
Total_exclusive	LCB1	47409000	41344000	34223000	NA	NA	NA
Total_exclusive	BMS1	13496000	12128000	13054000	NA	NA	NA
Total_exclusive	RPA190	4808900	3347900	4072200	NA	NA	NA
Total_exclusive	ACS2	47383000	17293000	24148000	NA	NA	NA
Total_exclusive	NUP157	5691700	3866900	3801800	NA	NA	NA
Total_exclusive	TUB1	127720000	74034000	89971000	NA	NA	NA
Total_exclusive	QCR2	41655000	19919000	21446000	NA	NA	NA
Total_exclusive	MIS1	13712000	12737000	15698000	NA	NA	NA
Total_exclusive	ALD6	41439000	25593000	25804000	NA	NA	NA
Total_exclusive	RPS29B	2050700000	2181100000	2289700000	NA	NA	NA
Total_exclusive	GCD1	36842000	24698000	22410000	NA	NA	NA
Total_exclusive	TOP2	3125300	6114700	5637300	NA	NA	NA
Total_exclusive	RPS29A	1853800000	1964200000	2072400000	NA	NA	NA
Total_exclusive	TCB1	9156100	9015500	5584800	NA	NA	NA
Total_exclusive	TCB3	8408100	5309100	3240500	NA	NA	NA
Total_exclusive	THS1	13027000	11552000	14500000	NA	NA	NA
Total_exclusive	EBP2	58066000	41024000	49203000	NA	NA	NA
Total_exclusive	SKI2	5121500	1610000	1720000	NA	NA	NA
Total_exclusive	CCT2	19545000	15835000	17825000	NA	NA	NA
Total_exclusive	RPT4	37531000	18143000	17853000	NA	NA	NA
Total_exclusive	MAK5	19388000	26929000	21959000	NA	NA	NA
Total_exclusive	SDA1	30394000	15977000	11841000	NA	NA	NA
Total_exclusive	RIX7	15272000	10191000	14829000	NA	NA	NA
Total_exclusive	PWP2	14495000	12063000	12364000	NA	NA	NA
Total_exclusive	NOP12	31091000	53599000	54634000	NA	NA	NA
Total_exclusive	NMD5	12762000	7224200	8720200	NA	NA	NA
Total_exclusive	UTP8	35861000	25536000	31233000	NA	NA	NA
Total_exclusive	NOP2	39265000	43842000	60510000	NA	NA	NA
Total_exclusive	SSE1	20814000	11950000	12331000	NA	NA	NA
Total_exclusive	VMA6	113480000	67408000	96427000	NA	NA	NA
Total_exclusive	RPT2	52118000	24486000	27657000	NA	NA	NA
Total_exclusive	CSE1	10921000	10881000	11370000	NA	NA	NA
Total_exclusive	CDC28	45900000	31136000	32293000	NA	NA	NA
Total_exclusive	CHO2	12494000	6663900	6599400	NA	NA	NA
Total_exclusive	SPB1	24599000	22772000	29166000	NA	NA	NA
Total_exclusive	DPS1	18244000	7879300	10775000	NA	NA	NA
Total_exclusive	CIC1	90253000	53999000	77380000	NA	NA	NA
Total_exclusive	RRB1	74503000	68587000	73249000	NA	NA	NA
Total_exclusive	NCL1	13993000	10637000	10895000	NA	NA	NA
Total_exclusive	SPF1	8875100	4101900	5331400	NA	NA	NA
Total_exclusive	ALA1	44750000	26853000	8162200	NA	NA	NA
Total_exclusive	RRP3	21530000	33552000	40607000	NA	NA	NA
Total_exclusive	UTP13	16729000	12863000	32706000	NA	NA	NA
Total_exclusive	PUS1	21021000	24661000	29049000	NA	NA	NA
Total_exclusive	MCM4	10814000	5426500	5376700	NA	NA	NA
Total_exclusive	SAS10	33535000	32727000	34396000	NA	NA	NA
Total_exclusive	RVB2	30011000	25365000	35946000	NA	NA	NA
Total_exclusive	RPL42A	83691000	110880000	266740000	NA	NA	NA
Total_exclusive	YCF1	5653600	6462300	9062600	NA	NA	NA
Total_exclusive	BCP1	58909000	73890000	75018000	NA	NA	NA
Total_exclusive	NOC2	22233000	21531000	32795000	NA	NA	NA
Total_exclusive	TRM5	24210000	14447000	17392000	NA	NA	NA
Total_exclusive	RIX1	14516000	9285800	9417800	NA	NA	NA
Total_exclusive	RKR1	3621400	2408500	3571700	NA	NA	NA
Total_exclusive	HCA4	21494000	18593000	19938000	NA	NA	NA
Total_exclusive	SSZ1	42164000	23039000	25586000	NA	NA	NA
Total_exclusive	SSD1	178820000	150720000	147930000	NA	NA	NA
Total_exclusive	COR1	31277000	15357000	14850000	NA	NA	NA
Total_exclusive	IDH1	110610000	78694000	90408000	NA	NA	NA
Total_exclusive	TIF1	55890000	35334000	40248000	NA	NA	NA
Total_exclusive	GEA2	3009600	1988600	2261000	NA	NA	NA
Total_exclusive	MCM6	6812200	3756900	3594700	NA	NA	NA
Total_exclusive	GGC1	47945000	49515000	43483000	NA	NA	NA
Total_exclusive	PGI1	42243000	20040000	24815000	NA	NA	NA
Total_exclusive	MPP10	20594000	20726000	15660000	NA	NA	NA
Total_exclusive	EGD2	423130000	529320000	357020000	NA	NA	NA
Total_exclusive	NUP133	6355600	5375000	7301500	NA	NA	NA
Total_exclusive	LCB2	54182000	41379000	41464000	NA	NA	NA
Total_exclusive	URB2	5056900	3506600	4993900	NA	NA	NA
Total_exclusive	TMA46	83262000	66729000	81940000	NA	NA	NA
Total_exclusive	MET6	6831700	5220200	4488300	NA	NA	NA
Total_exclusive	ERG11	47246000	21658000	21879000	NA	NA	NA
Total_exclusive	RPP2B	805550000	536570000	570600000	NA	NA	NA
Total_exclusive	RIA1	3877500	1468400	1534000	NA	NA	NA
Total_exclusive	DED81	24480000	14305000	16625000	NA	NA	NA
Total_exclusive	TCB2	4515100	7216500	5069300	NA	NA	NA
Total_exclusive	UTP15	23489000	30778000	25391000	NA	NA	NA
Total_exclusive	MCM5	11295000	3522100	6939200	NA	NA	NA
Total_exclusive	GDH1	19538000	4375900	6111900	NA	NA	NA
Total_exclusive	ACO2	7775500	10431000	8710600	NA	NA	NA
Total_exclusive	RPT6	53705000	32425000	36817000	NA	NA	NA
Total_exclusive	AAH1	40942000	49412000	48425000	NA	NA	NA
Total_exclusive	ERG27	56364000	45958000	49788000	NA	NA	NA
Total_exclusive	PDX1	31136000	25213000	24280000	NA	NA	NA
Total_exclusive	SEC13	71451000	45366000	48914000	NA	NA	NA
Total_exclusive	LSG1	17117000	6389300	8838200	NA	NA	NA
Total_exclusive	STT4	2277900	1403700	1147000	NA	NA	NA
Total_exclusive	IDH2	95073000	75700000	94453000	NA	NA	NA
Total_exclusive	BEM2	976030	1437300	1278900	NA	NA	NA
Total_exclusive	MSN5	4199500	2293100	2459300	NA	NA	NA
Total_exclusive	PWP1	24897000	16841000	19848000	NA	NA	NA
Total_exclusive	MET18	6207000	1785500	2647000	NA	NA	NA
Total_exclusive	ILV5	26104000	28293000	29427000	NA	NA	NA
Total_exclusive	KAP104	19103000	11277000	11968000	NA	NA	NA
Total_exclusive	NUP188	2320700	1487500	1806900	NA	NA	NA
Total_exclusive	TRP3	28678000	21772000	24252000	NA	NA	NA
Total_exclusive	RET1	3787200	2227800	3489500	NA	NA	NA
Total_exclusive	OAC1	78840000	90870000	106120000	NA	NA	NA
Total_exclusive	TRM732	2793100	2084500	2033000	NA	NA	NA
Total_exclusive	BRX1	103000000	84639000	110610000	NA	NA	NA
Total_exclusive	CPA1	17942000	20089000	21337000	NA	NA	NA
Total_exclusive	LOS1	6946600	4368800	5036900	NA	NA	NA
Total_exclusive	UTP21	13639000	8026100	9664200	NA	NA	NA
Total_exclusive	DBP9	18756000	16821000	16252000	NA	NA	NA
Total_exclusive	PUF6	17700000	14363000	16993000	NA	NA	NA
Total_exclusive	TRP2	25265000	27777000	38621000	NA	NA	NA
Total_exclusive	ERG13	33684000	43142000	45237000	NA	NA	NA
Total_exclusive	XRN1	4412800	2199600	2663900	NA	NA	NA
Total_exclusive	KRI1	21160000	24705000	29090000	NA	NA	NA
Total_exclusive	KRS1	15028000	11938000	8626600	NA	NA	NA
Total_exclusive	MON2	2663900	539180	615840	NA	NA	NA
Total_exclusive	NOP9	14051000	10840000	9922100	NA	NA	NA
Total_exclusive	PAA1	88820000	79535000	115480000	NA	NA	NA
Total_exclusive	ERG1	28230000	18015000	19589000	NA	NA	NA
Total_exclusive	IPI3	22535000	12630000	16872000	NA	NA	NA
Total_exclusive	ERG26	38918000	39689000	51526000	NA	NA	NA
Total_exclusive	RRP8	35554000	27305000	29229000	NA	NA	NA
Total_exclusive	RNR1	12591000	5169600	6702100	NA	NA	NA
Total_exclusive	PRS1	31086000	24394000	27195000	NA	NA	NA
Total_exclusive	RLI1	19137000	10929000	14869000	NA	NA	NA
Total_exclusive	CDC60	2882600	2035300	1568300	NA	NA	NA
Total_exclusive	PGA3	73409000	50613000	60012000	NA	NA	NA
Total_exclusive	RPF1	58729000	51573000	54321000	NA	NA	NA
Total_exclusive	YDR341C	3254800	4202400	6734800	NA	NA	NA
Total_exclusive	RSM23	18684000	8372400	7468000	NA	NA	NA
Total_exclusive	MCM2	5233900	2916800	3990300	NA	NA	NA
Total_exclusive	AAT1	15241000	6366300	8607700	NA	NA	NA
Total_exclusive	UTP4	13698000	7755000	5506900	NA	NA	NA
Total_exclusive	MSS51	14952000	15191000	18121000	NA	NA	NA
Total_exclusive	SNQ2	5448800	1431700	1381500	NA	NA	NA
Total_exclusive	RPN7	18685000	6790400	7928400	NA	NA	NA
Total_exclusive	YNR021W	59122000	59546000	70462000	NA	NA	NA
Total_exclusive	RRP9	16302000	11229000	12150000	NA	NA	NA
Total_exclusive	SHM1	20130000	21215000	25882000	NA	NA	NA
Total_exclusive	GCD2	29760000	21500000	26054000	NA	NA	NA
Total_exclusive	HOM2	31851000	23972000	27532000	NA	NA	NA
Total_exclusive	GCD7	50455000	47961000	38344000	NA	NA	NA
Total_exclusive	RLP7	115910000	170340000	186430000	NA	NA	NA
Total_exclusive	UTP6	11671000	3961200	4313400	NA	NA	NA
Total_exclusive	DIP2	8597200	5798000	6245400	NA	NA	NA
Total_exclusive	NOT3	7118300	6285100	4099600	NA	NA	NA
Total_exclusive	MCM3	2887400	2831000	3227000	NA	NA	NA
Total_exclusive	BMH1	47676000	41449000	49831000	NA	NA	NA
Total_exclusive	ERG5	12935000	5861100	4918700	NA	NA	NA
Total_exclusive	TIF35	20280000	41045000	52828000	NA	NA	NA
Total_exclusive	CEX1	8072600	6233700	7060900	NA	NA	NA
Total_exclusive	NSA1	21035000	8703800	11190000	NA	NA	NA
Total_exclusive	EMW1	4311900	4157300	5401600	NA	NA	NA
Total_exclusive	FPR4	71162000	147340000	138010000	NA	NA	NA
Total_exclusive	ERG9	33480000	16930000	22010000	NA	NA	NA
Total_exclusive	SGD1	7009200	3957200	3677700	NA	NA	NA
Total_exclusive	MRPL3	18737000	9648500	10028000	NA	NA	NA
Total_exclusive	RPP1B	2063300000	1740700000	1394100000	NA	NA	NA
Total_exclusive	NOC3	14318000	9579900	10940000	NA	NA	NA
Total_exclusive	CBR1	24129000	17186000	26595000	NA	NA	NA
Total_exclusive	NOP13	9560800	11305000	19218000	NA	NA	NA
Total_exclusive	DPM1	57132000	46160000	36599000	NA	NA	NA
Total_exclusive	NUP120	3408700	2325800	2173300	NA	NA	NA
Total_exclusive	SYO1	28396000	19400000	22834000	NA	NA	NA
Total_exclusive	KAP122	8105000	1987000	1736400	NA	NA	NA
Total_exclusive	IST2	9114500	9624000	10847000	NA	NA	NA
Total_exclusive	HGH1	18186000	17922000	20299000	NA	NA	NA
Total_exclusive	YOL098C	6317000	690800	1599000	NA	NA	NA
Total_exclusive	PIM1	2397200	1633100	1127500	NA	NA	NA
Total_exclusive	TYW1	5589700	8369400	8342900	NA	NA	NA
Total_exclusive	TIF6	624800000	445210000	384010000	NA	NA	NA
Total_exclusive	RRP1	43395000	20914000	35739000	NA	NA	NA
Total_exclusive	RMT2	60246000	30407000	35894000	NA	NA	NA
Total_exclusive	RPL37A	10969000	22463000	29880000	NA	NA	NA
Total_exclusive	LYS4	996980	3227000	3790600	NA	NA	NA
Total_exclusive	GCN3	48175000	23119000	41908000	NA	NA	NA
Total_exclusive	TOM40	53628000	25603000	43496000	NA	NA	NA
Total_exclusive	PMT2	12846000	13738000	18645000	NA	NA	NA
Total_exclusive	ETT1	48958000	39175000	34494000	NA	NA	NA
Total_exclusive	WBP1	25574000	20576000	21952000	NA	NA	NA
Total_exclusive	PIL1	55469000	32544000	64373000	NA	NA	NA
Total_exclusive	YVH1	10863000	25652000	29414000	NA	NA	NA
Total_exclusive	GPP1	46855000	46447000	43829000	NA	NA	NA
Total_exclusive	MCX1	12790000	6395600	11401000	NA	NA	NA
Total_exclusive	GND1	10661000	8038300	7680500	NA	NA	NA
Total_exclusive	NIC96	2938000	2579600	4250000	NA	NA	NA
Total_exclusive	YPP1	5115000	2150200	2793900	NA	NA	NA
Total_exclusive	TUF1	10571000	17018000	17624000	NA	NA	NA
Total_exclusive	UTP9	15155000	10581000	10885000	NA	NA	NA
Total_exclusive	MSH2	2462800	4247700	3654300	NA	NA	NA
Total_exclusive	BFR1	12672000	5342000	8205400	NA	NA	NA
Total_exclusive	MRN1	13037000	6261100	5776400	NA	NA	NA
Total_exclusive	PHO88	38637000	38721000	50703000	NA	NA	NA
Total_exclusive	FPR3	132100000	285340000	209010000	NA	NA	NA
Total_exclusive	SFB2	3905400	2357400	2751200	NA	NA	NA
Total_exclusive	ELP3	12960000	8262600	7718000	NA	NA	NA
Total_exclusive	RPO31	693970	294090	1179700	NA	NA	NA
Total_exclusive	GNP1	17751000	13379000	17222000	NA	NA	NA
Total_exclusive	TKL1	13926000	4549900	6588800	NA	NA	NA
Total_exclusive	SHM2	14627000	21825000	27370000	NA	NA	NA
Total_exclusive	UTP7	15158000	14379000	15021000	NA	NA	NA
Total_exclusive	SEC53	31111000	17239000	16684000	NA	NA	NA
Total_exclusive	DLD3	8254800	34266000	23400000	NA	NA	NA
Total_exclusive	YRA1	219900000	71058000	116600000	NA	NA	NA
Total_exclusive	GAR1	185170000	178150000	180170000	NA	NA	NA
Total_exclusive	PPM2	4143900	3936200	3083300	NA	NA	NA
Total_exclusive	NAB6	4505600	1148400	2279300	NA	NA	NA
Total_exclusive	GSF2	30083000	19782000	25274000	NA	NA	NA
Total_exclusive	SCL1	32963000	27116000	25588000	NA	NA	NA
Total_exclusive	SEC23	6393600	5502700	2831000	NA	NA	NA
Total_exclusive	VTC4	8446000	798620	1287300	NA	NA	NA
Total_exclusive	ALG9	7991900	11214000	13101000	NA	NA	NA
Total_exclusive	MCM7	2549000	15026000	1748300	NA	NA	NA
Total_exclusive	REI1	13997000	11916000	14366000	NA	NA	NA
Total_exclusive	SES1	12060000	6808100	8508600	NA	NA	NA
Total_exclusive	PHB1	21570000	22689000	33564000	NA	NA	NA
Total_exclusive	YML6	22687000	13381000	22889000	NA	NA	NA
Total_exclusive	GUA1	13338000	10109000	14790000	NA	NA	NA
Total_exclusive	ADE3	4077900	1860100	2827800	NA	NA	NA
Total_exclusive	GCD11	14212000	13571000	11776000	NA	NA	NA
Total_exclusive	AFG2	6960400	2735500	3220300	NA	NA	NA
Total_exclusive	UBA4	18442000	5236500	8931700	NA	NA	NA
Total_exclusive	YTA12	2151700	1438700	1954500	NA	NA	NA
Total_exclusive	HXK2	10196000	3604700	8782500	NA	NA	NA
Total_exclusive	SCH9	9898300	9344300	8194800	NA	NA	NA
Total_exclusive	YKR018C	5474900	6295500	7120900	NA	NA	NA
Total_exclusive	TRA1	489880	164020	196770	NA	NA	NA
Total_exclusive	NCP1	6127200	3558100	3747400	NA	NA	NA
Total_exclusive	PNO1	35108000	38049000	37461000	NA	NA	NA
Total_exclusive	YMC1	16032000	16127000	19952000	NA	NA	NA
Total_exclusive	RPN3	8327700	3805800	7766800	NA	NA	NA
Total_exclusive	GCN20	5842100	2379800	2159400	NA	NA	NA
Total_exclusive	NUP85	6137000	3058100	4379400	NA	NA	NA
Total_exclusive	NOC4	11332000	6439300	9958300	NA	NA	NA
Total_exclusive	RPP1A	231180000	11874000	15381000	NA	NA	NA
Total_exclusive	NAT1	4802000	4292700	2674400	NA	NA	NA
Total_exclusive	SPT16	1696000	1601000	2562200	NA	NA	NA
Total_exclusive	PYC2	1749900	3250700	3269000	NA	NA	NA
Total_exclusive	TMA19	178210000	166040000	181390000	NA	NA	NA
Total_exclusive	DIM1	22101000	16067000	18784000	NA	NA	NA
Total_exclusive	MRH1	51607000	90006000	88618000	NA	NA	NA
Total_exclusive	SEC28	37815000	28290000	40954000	NA	NA	NA
Total_exclusive	NAM9	8585300	4620400	4112900	NA	NA	NA
Total_exclusive	MOT1	804660	502120	622640	NA	NA	NA
Total_exclusive	MDJ1	9486500	6598000	5878000	NA	NA	NA
Total_exclusive	NDE1	5016900	4464100	1960200	NA	NA	NA
Total_exclusive	PMT4	4290900	7945100	22430000	NA	NA	NA
Total_exclusive	ARO8	8532900	4539800	3477200	NA	NA	NA
Total_exclusive	MTR10	3259500	765100	1976500	NA	NA	NA
Total_exclusive	VAC8	12582000	8936400	7083700	NA	NA	NA
Total_exclusive	TPI1	65324000	63036000	51317000	NA	NA	NA
Total_exclusive	GLY1	11157000	8374100	10044000	NA	NA	NA
Total_exclusive	DCP2	5842900	3545800	2484700	NA	NA	NA
Total_exclusive	RCM1	8445100	4702900	4357200	NA	NA	NA
Total_exclusive	UBP3	3805300	5781300	6811500	NA	NA	NA
Total_exclusive	MBF1	60913000	67896000	82555000	NA	NA	NA
Total_exclusive	IMP4	33754000	29456000	22431000	NA	NA	NA
Total_exclusive	DBP10	5230900	3481500	3087900	NA	NA	NA
Total_exclusive	NUP145	3830300	1729500	2145000	NA	NA	NA
Total_exclusive	OST1	28711000	10319000	11598000	NA	NA	NA
Total_exclusive	RSC8	4133900	7285200	11123000	NA	NA	NA
Total_exclusive	GAS1	16227000	12588000	18540000	NA	NA	NA
Total_exclusive	MKT1	5698400	3086000	2638300	NA	NA	NA
Total_exclusive	SPB4	10818000	1169100	1095300	NA	NA	NA
Total_exclusive	CCR4	10750000	3213800	4398700	NA	NA	NA
Total_exclusive	KAP120	5083400	3114700	3842400	NA	NA	NA
Total_exclusive	CKA2	12581000	8049600	8920400	NA	NA	NA
Total_exclusive	TIF5	12935000	9710400	8355200	NA	NA	NA
Total_exclusive	MET17	17581000	9845400	5564200	NA	NA	NA
Total_exclusive	SRP101	7600000	4131000	4472000	NA	NA	NA
Total_exclusive	PRS3	21501000	7573400	8008100	NA	NA	NA
Total_exclusive	BFR2	5543100	3156300	3343000	NA	NA	NA
Total_exclusive	MAK16	39755000	22828000	19954000	NA	NA	NA
Total_exclusive	VPS1	2496700	1535200	2952000	NA	NA	NA
Total_exclusive	VTC2	4542700	1344300	363710	NA	NA	NA
Total_exclusive	DPL1	2298800	2294500	2858900	NA	NA	NA
Total_exclusive	EMG1	29402000	25970000	30085000	NA	NA	NA
Total_exclusive	PMR1	3365300	1121400	1915800	NA	NA	NA
Total_exclusive	KTR3	14844000	7716500	7551300	NA	NA	NA
Total_exclusive	PRE5	45876000	41886000	38408000	NA	NA	NA
Total_exclusive	EGD1	78833000	289980000	192180000	NA	NA	NA
Total_exclusive	NSA2	72221000	46127000	38468000	NA	NA	NA
Total_exclusive	SEH1	13657000	18903000	18002000	NA	NA	NA
Total_exclusive	LYS21	6879000	3360200	4815300	NA	NA	NA
Total_exclusive	MGM101	13007000	7987700	6897600	NA	NA	NA
Total_exclusive	ATP3	18313000	16546000	15838000	NA	NA	NA
Total_exclusive	PHB2	12632000	17021000	31607000	NA	NA	NA
Total_exclusive	MRPL35	15786000	6332500	7891600	NA	NA	NA
Total_exclusive	SLC1	33102000	27398000	19267000	NA	NA	NA
Total_exclusive	POM152	999600	966440	684010	NA	NA	NA
Total_exclusive	ROK1	9774000	4114800	5478800	NA	NA	NA
Total_exclusive	CTR86	4026300	2757400	2984100	NA	NA	NA
Total_exclusive	PDI1	6691000	11395000	6713700	NA	NA	NA
Total_exclusive	RPN8	8764600	6661000	10570000	NA	NA	NA
Total_exclusive	DEF1	22205000	27948000	27282000	NA	NA	NA
Total_exclusive	DBP8	12463000	9093200	13675000	NA	NA	NA
Total_exclusive	MNN11	5120600	1606200	9298300	NA	NA	NA
Total_exclusive	NOP16	26813000	35661000	36205000	NA	NA	NA
Total_exclusive	MRPS35	18303000	9304000	8670800	NA	NA	NA
Total_exclusive	SPT15	23191000	12454000	21079000	NA	NA	NA
Total_exclusive	MRP4	13666000	6393600	8554200	NA	NA	NA
Total_exclusive	SSM4	2570400	1369700	6537200	NA	NA	NA
Total_exclusive	NIP7	35043000	32891000	45523000	NA	NA	NA
Total_exclusive	RIP1	43132000	35969000	44966000	NA	NA	NA
Total_exclusive	MRPL24	17658000	7771000	8778800	NA	NA	NA
Total_exclusive	SSH1	44807000	40780000	42225000	NA	NA	NA
Total_exclusive	HTB2	88161000	93592000	108670000	NA	NA	NA
Total_exclusive	RPN5	7312700	2844500	10029000	NA	NA	NA
Total_exclusive	UTP18	29866000	17277000	13108000	NA	NA	NA
Total_exclusive	MET5	2298900	1061600	1954600	NA	NA	NA
Total_exclusive	BRE5	4261200	7364400	10913000	NA	NA	NA
Total_exclusive	RPN9	4233600	5259800	8910200	NA	NA	NA
Total_exclusive	CDC33	29803000	52429000	52485000	NA	NA	NA
Total_exclusive	RFC1	1974200	3024000	2422400	NA	NA	NA
Total_exclusive	GPI16	6062200	5097900	10874000	NA	NA	NA
Total_exclusive	PRE9	35289000	32509000	26977000	NA	NA	NA
Total_exclusive	TSC13	22930000	16018000	21818000	NA	NA	NA
Total_exclusive	ALG2	8822100	8966100	8361400	NA	NA	NA
Total_exclusive	RCL1	21694000	17267000	17052000	NA	NA	NA
Total_exclusive	RPP2A	336260000	282290000	288040000	NA	NA	NA
Total_exclusive	CAM1	64142000	39963000	46623000	NA	NA	NA
Total_exclusive	RPC82	2396700	697740	1688400	NA	NA	NA
Total_exclusive	RFC5	14921000	12423000	13145000	NA	NA	NA
Total_exclusive	RFC3	9175800	7725700	7105000	NA	NA	NA
Total_exclusive	VMA13	8721600	1826800	5014900	NA	NA	NA
Total_exclusive	NOP14	3743100	3515800	4436600	NA	NA	NA
Total_exclusive	STT3	6529900	1715600	3167200	NA	NA	NA
Total_exclusive	PUF3	7119000	143350	2635500	NA	NA	NA
Total_exclusive	RPS30B	880710000	516530000	471100000	NA	NA	NA
Total_exclusive	SIS1	26513000	13539000	17948000	NA	NA	NA
Total_exclusive	PUP2	32845000	24566000	21398000	NA	NA	NA
Total_exclusive	OSH3	1518500	883880	718370	NA	NA	NA
Total_exclusive	TAF6	5503200	4506700	5190500	NA	NA	NA
Total_exclusive	UFD4	441630	334580	348970	NA	NA	NA
Total_exclusive	BEM4	2251700	2212400	1374600	NA	NA	NA
Total_exclusive	ODC2	28589000	16343000	17004000	NA	NA	NA
Total_exclusive	PBY1	3042900	2554400	1686300	NA	NA	NA
Total_exclusive	LAA1	1037500	132020	319790	NA	NA	NA
Total_exclusive	POL1	399540	919790	679940	NA	NA	NA
Total_exclusive	MYO4	1180200	934380	1239300	NA	NA	NA
Total_exclusive	PUF4	6650800	6692000	6210000	NA	NA	NA
Total_exclusive	EFB1	44674000	124260000	106050000	NA	NA	NA
Total_exclusive	SCS2	49035000	56242000	51359000	NA	NA	NA
Total_exclusive	HEM1	6089300	8712100	4569900	NA	NA	NA
Total_exclusive	KRR1	12809000	4399900	13164000	NA	NA	NA
Total_exclusive	AAP1	1950200	460440	1053900	NA	NA	NA
Total_exclusive	EDC3	10615000	7187000	8341500	NA	NA	NA
Total_exclusive	SMC3	1946500	949690	1227500	NA	NA	NA
Total_exclusive	YMC2	5535500	3950800	4891900	NA	NA	NA
Total_exclusive	PDR12	454920	2492500	1696700	NA	NA	NA
Total_exclusive	SDH1	6587600	7683300	6961800	NA	NA	NA
Total_exclusive	TSA1	51712000	46948000	43098000	NA	NA	NA
Total_exclusive	THR1	11720000	12573000	18478000	NA	NA	NA
Total_exclusive	SRP54	15769000	4737600	6679700	NA	NA	NA
Total_exclusive	SEC10	423350	580860	1131700	NA	NA	NA
Total_exclusive	COX2	37441000	12980000	27802000	NA	NA	NA
Total_exclusive	MRP7	11938000	3447800	9233000	NA	NA	NA
Total_exclusive	SLY1	3537300	3725800	5292800	NA	NA	NA
Total_exclusive	OXP1	941670	14871000	345060	NA	NA	NA
Total_exclusive	LOC1	106510000	71919000	85007000	NA	NA	NA
Total_exclusive	RTN1	15798000	22291000	33797000	NA	NA	NA
Total_exclusive	COG4	28108000	347500	326310	NA	NA	NA
Total_exclusive	HMG2	8481300	4821800	6064100	NA	NA	NA
Total_exclusive	LIP5	11347000	5032100	3757900	NA	NA	NA
Total_exclusive	TPA1	922420	4067800	5429300	NA	NA	NA
Total_exclusive	ARG5	1342000	1190100	3104200	NA	NA	NA
Total_exclusive	YPL245W	4298000	5742000	4312700	NA	NA	NA
Total_exclusive	GLC7	13899000	8826900	13233000	NA	NA	NA
Total_exclusive	CYT1	15515000	12313000	36781000	NA	NA	NA
Total_exclusive	TSR1	8116100	1491200	2373400	NA	NA	NA
Total_exclusive	MRPL40	10153000	11629000	14173000	NA	NA	NA
Total_exclusive	PRP43	2146400	1332500	1005700	NA	NA	NA
Total_exclusive	HMO1	36962000	163850000	146150000	NA	NA	NA
Total_exclusive	PDS5	755220	95914	370540	NA	NA	NA
Total_exclusive	RSM24	10369000	4307500	5610700	NA	NA	NA
Total_exclusive	REP1	23252000	20931000	12577000	NA	NA	NA
Total_exclusive	PMT1	6211400	6388100	5485300	NA	NA	NA
Total_exclusive	LYS9	2453100	682360	2088300	NA	NA	NA
Total_exclusive	RKM4	6488500	3397200	5764300	NA	NA	NA
Total_exclusive	SUP35	4383600	1458400	502560	NA	NA	NA
Total_exclusive	ERG6	9538500	4277100	3379600	NA	NA	NA
Total_exclusive	RFC2	11033000	11068000	8631400	NA	NA	NA
Total_exclusive	RSC3	2095000	769240	941710	NA	NA	NA
Total_exclusive	GET3	17072000	9498600	9098900	NA	NA	NA
Total_exclusive	NUP82	2678000	1767900	2989100	NA	NA	NA
Total_exclusive	MRD1	1323400	3953200	4250800	NA	NA	NA
Total_exclusive	ERG4	17628000	8696700	10909000	NA	NA	NA
Total_exclusive	ARF1	24746000	13808000	10969000	NA	NA	NA
Total_exclusive	COQ1	6732400	4901300	4214100	NA	NA	NA
Total_exclusive	MRPS28	6794000	4016600	2044500	NA	NA	NA
Total_exclusive	ILV6	13932000	14327000	15543000	NA	NA	NA
Total_exclusive	IMP3	16357000	13410000	6678200	NA	NA	NA
Total_exclusive	NOP8	5408000	7582200	11337000	NA	NA	NA
Total_exclusive	POL3	1839500	461070	506160	NA	NA	NA
Total_exclusive	TOM71	1549600	3157200	6718100	NA	NA	NA
Total_exclusive	MNN1	1487400	647120	2262400	NA	NA	NA
Total_exclusive	TRS120	1293900	290190	0	NA	NA	NA
Total_exclusive	SEC61	33440000	17798000	18302000	NA	NA	NA
Total_exclusive	TOM1	198280	90969	145470	NA	NA	NA
Total_exclusive	NSP1	5010700	3344700	4424700	NA	NA	NA
Total_exclusive	PRO3	43599000	17327000	36481000	NA	NA	NA
Total_exclusive	CLA4	2392800	2488400	2275700	NA	NA	NA
Total_exclusive	SCJ1	10538000	12686000	11154000	NA	NA	NA
Total_exclusive	MRPL7	12424000	17540000	18979000	NA	NA	NA
Total_exclusive	NEO1	191050	1261000	412860	NA	NA	NA
Total_exclusive	APL5	2211900	939550	1385900	NA	NA	NA
Total_exclusive	URE2	10829000	4308100	5503200	NA	NA	NA
Total_exclusive	UTP5	11765000	9428100	8964400	NA	NA	NA
Total_exclusive	NOP6	32791000	28112000	32319000	NA	NA	NA
Total_exclusive	TRP5	3269300	858180	1285200	NA	NA	NA
Total_exclusive	NAP1	5301300	8096300	10634000	NA	NA	NA
Total_exclusive	ERJ5	26593000	23286000	16222000	NA	NA	NA
Total_exclusive	PHO86	16301000	13431000	16434000	NA	NA	NA
Total_exclusive	MRPS17	17277000	7394700	7740500	NA	NA	NA
Total_exclusive	ACO1	2850700	1503700	615210	NA	NA	NA
Total_exclusive	YGR210C	4196500	5123000	4226200	NA	NA	NA
Total_exclusive	IML2	4117100	1576300	1823300	NA	NA	NA
Total_exclusive	MRP51	11871000	6058700	6084700	NA	NA	NA
Total_exclusive	RIO1	1727500	1976700	776890	NA	NA	NA
Total_exclusive	PPH22	6886800	3747700	5432900	NA	NA	NA
Total_exclusive	CDC10	2453700	4648500	6701900	NA	NA	NA
Total_exclusive	CYS3	17854000	12642000	8969000	NA	NA	NA
Total_exclusive	NHP2	108710000	150080000	132890000	NA	NA	NA
Total_exclusive	SRP14	45905000	28444000	28421000	NA	NA	NA
Total_exclusive	RMD9	2518200	724200	2734100	NA	NA	NA
Total_exclusive	GPD2	5508200	6057200	11702000	NA	NA	NA
Total_exclusive	ENP2	6171800	2874900	2873000	NA	NA	NA
Total_exclusive	ERG25	74264000	58787000	65763000	NA	NA	NA
Total_exclusive	SMY2	4177700	5579900	2156200	NA	NA	NA
Total_exclusive	MEU1	21378000	4288600	167220	NA	NA	NA
Total_exclusive	PRE10	17177000	19265000	16888000	NA	NA	NA
Total_exclusive	BPT1	634070	687080	1716900	NA	NA	NA
Total_exclusive	SEC4	13913000	9884700	4370900	NA	NA	NA
Total_exclusive	KTR1	7772200	370130	3128400	NA	NA	NA
Total_exclusive	MRPL4	14912000	7017800	9390200	NA	NA	NA
Total_exclusive	TAF5	5229000	2225600	1592800	NA	NA	NA
Total_exclusive	REH1	14738000	8919000	8140300	NA	NA	NA
Total_exclusive	RPN6	6330200	4086300	6299400	NA	NA	NA
Total_exclusive	IMG1	22111000	12445000	9999100	NA	NA	NA
Total_exclusive	ILV3	3328500	1337800	1719400	NA	NA	NA
Total_exclusive	ERV46	8846100	8629400	9040000	NA	NA	NA
Total_exclusive	POL30	9581100	3556300	3933500	NA	NA	NA
Total_exclusive	MRPL17	7024100	3887000	4888500	NA	NA	NA
Total_exclusive	FAP7	22950000	8133900	12474000	NA	NA	NA
Total_exclusive	EMP70	5746000	4417900	5093500	NA	NA	NA
Total_exclusive	EXO84	1175900	462910	286790	NA	NA	NA
Total_exclusive	YLR419W	949260	1301600	422850	NA	NA	NA
Total_exclusive	SQT1	33819000	25058000	26216000	NA	NA	NA
Total_exclusive	MRPS9	23650000	11924000	11989000	NA	NA	NA
Total_exclusive	RTS1	4676200	3187500	3974600	NA	NA	NA
Total_exclusive	NPA3	15302000	8036400	7179000	NA	NA	NA
Total_exclusive	JJJ1	4796200	2169500	2054800	NA	NA	NA
Total_exclusive	MSH6	370870	834850	1079100	NA	NA	NA
Total_exclusive	SEC65	19052000	9461200	9830200	NA	NA	NA
Total_exclusive	RIM2	10970000	7679900	8181300	NA	NA	NA
Total_exclusive	PET123	14440000	8206800	10674000	NA	NA	NA
Total_exclusive	PET10	5833200	620930	2144500	NA	NA	NA
Total_exclusive	CDS1	147050000	406330000	469900000	NA	NA	NA
Total_exclusive	PBP1	3053200	1623800	2832400	NA	NA	NA
Total_exclusive	MRPL13	14274000	8573200	9732800	NA	NA	NA
Total_exclusive	SCS7	21438000	12309000	8607000	NA	NA	NA
Total_exclusive	FSF1	64704000	7306900	9871800	NA	NA	NA
Total_exclusive	GIN4	1263800	398310	601400	NA	NA	NA
Total_exclusive	RPL29	195600000	1613400000	1755800000	NA	NA	NA
Total_exclusive	CAF40	10402000	8807700	9437700	NA	NA	NA
Total_exclusive	EFR3	2437700	1254400	1365800	NA	NA	NA
Total_exclusive	GPI17	6689300	2618500	3907000	NA	NA	NA
Total_exclusive	GPN2	8075700	5764800	4033000	NA	NA	NA
Total_exclusive	MRP1	10053000	6166700	8265000	NA	NA	NA
Total_exclusive	VMA5	2427700	5948300	5993600	NA	NA	NA
Total_exclusive	RPF2	15182000	12749000	15557000	NA	NA	NA
Total_exclusive	APM3	7058100	2273600	1980000	NA	NA	NA
Total_exclusive	RIO2	6487800	4088900	3739200	NA	NA	NA
Total_exclusive	PRS5	4155600	2473400	3614500	NA	NA	NA
Total_exclusive	SEC3	728550	53769	0	NA	NA	NA
Total_exclusive	MRPL8	20804000	4336200	6028400	NA	NA	NA
Total_exclusive	DBP7	3250500	2686500	1404200	NA	NA	NA
Total_exclusive	POP2	12203000	11457000	7709400	NA	NA	NA
Total_exclusive	AFG3	1710300	737950	1201400	NA	NA	NA
Total_exclusive	HTA1	0	316130000	494470000	NA	NA	NA
Total_exclusive	RNR4	4402300	3609300	2920300	NA	NA	NA
Total_exclusive	YGR266W	1370500	2075800	1457400	NA	NA	NA
Total_exclusive	HEH2	2143500	1237200	1112800	NA	NA	NA
Total_exclusive	ARP2	8261600	4459200	5266900	NA	NA	NA
Total_exclusive	RFC4	4631900	5362600	4754100	NA	NA	NA
Total_exclusive	ERG10	16442000	1435300	2029600	NA	NA	NA
Total_exclusive	CKI1	1265900	957020	1313900	NA	NA	NA
Total_exclusive	VPS35	1322900	620130	1062800	NA	NA	NA
Total_exclusive	DHR2	2551500	1621400	459540	NA	NA	NA
Total_exclusive	SEC31	1371300	434940	472100	NA	NA	NA
Total_exclusive	EMC2	3419900	1926200	4985500	NA	NA	NA
Total_exclusive	HCH1	10680000	22063000	38386000	NA	NA	NA
Total_exclusive	RLP24	120450000	172530000	197120000	NA	NA	NA
Total_exclusive	NOT5	7095100	2322700	5393100	NA	NA	NA
Total_exclusive	ENA1	700200	0	398190	NA	NA	NA
Total_exclusive	FRS2	1148700	1219700	1630200	NA	NA	NA
Total_exclusive	PEP1	877220	223340	294020	NA	NA	NA
Total_exclusive	MRPL10	8507800	6054500	4368300	NA	NA	NA
Total_exclusive	HLJ1	14792000	12142000	11750000	NA	NA	NA
Total_exclusive	LCB4	3462000	1344200	2004500	NA	NA	NA
Total_exclusive	ATP4	22637000	2073800	4021100	NA	NA	NA
Total_exclusive	SST2	5267500	4397500	4807600	NA	NA	NA
Total_exclusive	IDI1	0	9627900	13249000	NA	NA	NA
Total_exclusive	SEC15	1202500	429610	571960	NA	NA	NA
Total_exclusive	HXT2	8049900	9520100	10985000	NA	NA	NA
Total_exclusive	RBG2	2107800	149860	519350	NA	NA	NA
Total_exclusive	RPO21	485700	675270	205420	NA	NA	NA
Total_exclusive	PRE1	16195000	10182000	10910000	NA	NA	NA
Total_exclusive	SAP185	1117200	1605200	2041100	NA	NA	NA
Total_exclusive	KRE2	4390500	167570	262720	NA	NA	NA
Total_exclusive	WHI3	3773000	6784200	6096300	NA	NA	NA
Total_exclusive	MNN10	6075100	0	6183100	NA	NA	NA
Total_exclusive	YGR250C	2380000	963910	771470	NA	NA	NA
Total_exclusive	IPP1	2578800	6290200	7279700	NA	NA	NA
Total_exclusive	OPI3	37731000	3972500	7271200	NA	NA	NA
Total_exclusive	DUN1	1369300	1703300	1268600	NA	NA	NA
Total_exclusive	HOM3	773410	246610	1173500	NA	NA	NA
Total_exclusive	SAR1	21555000	9656700	10072000	NA	NA	NA
Total_exclusive	RDH54	1777700	361610	575150	NA	NA	NA
Total_exclusive	BAT1	1322000	2817100	3107900	NA	NA	NA
Total_exclusive	YBP2	1177100	1041900	1399000	NA	NA	NA
Total_exclusive	LOA1	17763000	6855500	8996800	NA	NA	NA
Total_exclusive	BUD20	35243000	20174000	25721000	NA	NA	NA
Total_exclusive	RPC34	6560700	4828200	5003300	NA	NA	NA
Total_exclusive	GEA1	287340	577940	170690	NA	NA	NA
Total_exclusive	NUP84	3853300	2345000	2565000	NA	NA	NA
Total_exclusive	ARE2	9915900	6404900	9550800	NA	NA	NA
Total_exclusive	MRPL22	6699200	3902600	4621100	NA	NA	NA
Total_exclusive	NSG2	14949000	12216000	9496600	NA	NA	NA
Total_exclusive	RSN1	2843100	2100000	2925100	NA	NA	NA
Total_exclusive	VPS29	12035000	7852000	8543600	NA	NA	NA
Total_exclusive	XDJ1	352350	1731400	1258600	NA	NA	NA
Total_exclusive	BLM10	55071	0	256940	NA	NA	NA
Total_exclusive	YPT1	9209000	7633900	3811600	NA	NA	NA
Total_exclusive	ZUO1	6565200	4017900	4218300	NA	NA	NA
Total_exclusive	MNN9	7868900	3834300	11369000	NA	NA	NA
Total_exclusive	EMP47	5508600	10653000	20933000	NA	NA	NA
Total_exclusive	SRP1	5537900	2991600	4273200	NA	NA	NA
Total_exclusive	DAS2	9958100	6604300	3072000	NA	NA	NA
Total_exclusive	INO80	462280	454440	966540	NA	NA	NA
Total_exclusive	SEC5	673950	549660	198500	NA	NA	NA
Total_exclusive	VPS13	246630	0	62380	NA	NA	NA
Total_exclusive	CDC34	7793800	13973000	14557000	NA	NA	NA
Total_exclusive	SRP102	11181000	9527600	12169000	NA	NA	NA
Total_exclusive	FAA3	5788200	4770500	6494700	NA	NA	NA
Total_exclusive	COG3	960210	30238	0	NA	NA	NA
Total_exclusive	ARP9	2140600	1223700	2509600	NA	NA	NA
Total_exclusive	ALG11	1918700	933100	1832900	NA	NA	NA
Total_exclusive	RPA49	6395300	4922300	5181500	NA	NA	NA
Total_exclusive	RSM28	9438800	5204100	4278200	NA	NA	NA
Total_exclusive	MET3	10742000	1059400	924980	NA	NA	NA
Total_exclusive	AHP1	15980000	13369000	11436000	NA	NA	NA
Total_exclusive	RSM7	5163800	6985500	5446400	NA	NA	NA
Total_exclusive	HHT1	110620000	295650000	293440000	NA	NA	NA
Total_exclusive	MRPS5	13057000	8836600	6916300	NA	NA	NA
Total_exclusive	MRPL49	16068000	8897400	13672000	NA	NA	NA
Total_exclusive	RSC9	1919600	2052700	2567600	NA	NA	NA
Total_exclusive	YMR310C	11196000	5279600	3396500	NA	NA	NA
Total_exclusive	CPR1	13015000	34868000	26320000	NA	NA	NA
Total_exclusive	SEC62	17994000	18674000	15625000	NA	NA	NA
Total_exclusive	USO1	167370	95260	63645	NA	NA	NA
Total_exclusive	STH1	405680	831640	1033400	NA	NA	NA
Total_exclusive	COY1	1425000	596560	352480	NA	NA	NA
Total_exclusive	BUD23	41347000	21597000	36588000	NA	NA	NA
Total_exclusive	RPN12	9527200	956260	4349500	NA	NA	NA
Total_exclusive	APL6	820740	0	697690	NA	NA	NA
Total_exclusive	UBX2	3580700	2771500	640370	NA	NA	NA
Total_exclusive	GLN4	945740	133040	431110	NA	NA	NA
Total_exclusive	SEC11	10958000	7878400	11272000	NA	NA	NA
Total_exclusive	LTV1	7624600	7253400	4480200	NA	NA	NA
Total_exclusive	TBF1	2998900	0	2789200	NA	NA	NA
Total_exclusive	DFM1	9616900	9026000	12338000	NA	NA	NA
Total_exclusive	ASN1	3472300	2077900	1083100	NA	NA	NA
Total_exclusive	HST2	5807000	1416700	1486700	NA	NA	NA
Total_exclusive	ARP4	1682400	2205500	1924500	NA	NA	NA
Total_exclusive	ACL4	8019600	2208800	5328400	NA	NA	NA
Total_exclusive	ERG20	5002700	2319500	2928200	NA	NA	NA
Total_exclusive	GPA1	946240	705160	1385500	NA	NA	NA
Total_exclusive	RPP1	5095400	3886000	4408100	NA	NA	NA
Total_exclusive	ASG1	503590	0	229610	NA	NA	NA
Total_exclusive	SAM37	6599200	1636400	2280600	NA	NA	NA
Total_exclusive	PGM1	1254600	0	337050	NA	NA	NA
Total_exclusive	CCA1	1314500	479220	685520	NA	NA	NA
Total_exclusive	PUP3	33684000	27986000	25163000	NA	NA	NA
Total_exclusive	ALG5	5896800	3877500	2220100	NA	NA	NA
Total_exclusive	MPH1	369100	360090	2282600	NA	NA	NA
Total_exclusive	NUP116	3917100	2952000	1182100	NA	NA	NA
Total_exclusive	IDP1	1579300	2087100	1454100	NA	NA	NA
Total_exclusive	MGR1	2477500	1843400	1565900	NA	NA	NA
Total_exclusive	SCT1	1610400	1251800	1758800	NA	NA	NA
Total_exclusive	MRPS18	11035000	2439600	2846400	NA	NA	NA
Total_exclusive	TOM22	47915000	53921000	47135000	NA	NA	NA
Total_exclusive	TRM82	3656700	2551700	2077500	NA	NA	NA
Total_exclusive	NOP53	3357100	5256800	7168300	NA	NA	NA
Total_exclusive	EFG1	20597000	19659000	24672000	NA	NA	NA
Total_exclusive	FSH3	7788200	3785300	2866600	NA	NA	NA
Total_exclusive	ERG3	13059000	23274000	25386000	NA	NA	NA
Total_exclusive	MRP20	9504400	3761900	5243300	NA	NA	NA
Total_exclusive	LST8	4517800	2100400	2648700	NA	NA	NA
Total_exclusive	COG8	1481000	788570	1132500	NA	NA	NA
Total_exclusive	NTE1	315510	256300	0	NA	NA	NA
Total_exclusive	ERG12	1863800	0	703330	NA	NA	NA
Total_exclusive	HOM6	5389200	2783800	3289400	NA	NA	NA
Total_exclusive	SEC8	862220	189420	243860	NA	NA	NA
Total_exclusive	IMD3	2757400	1793900	1229800	NA	NA	NA
Total_exclusive	CDC36	18705000	15941000	6647800	NA	NA	NA
Total_exclusive	EMP24	16783000	7390900	5000300	NA	NA	NA
Total_exclusive	TIM23	21682000	17692000	15201000	NA	NA	NA
Total_exclusive	MOT2	5073500	3713100	5624100	NA	NA	NA
Total_exclusive	PRE6	21322000	15895000	11862000	NA	NA	NA
Total_exclusive	APS3	26579000	16360000	20439000	NA	NA	NA
Total_exclusive	RCF2	22755000	19157000	23605000	NA	NA	NA
Total_exclusive	HTZ1	120410000	87981000	165580000	NA	NA	NA
Total_exclusive	CKA1	1013600	1235000	364450	NA	NA	NA
Total_exclusive	FPR1	10383000	21363000	26707000	NA	NA	NA
Total_exclusive	ELO2	58398000	54049000	57641000	NA	NA	NA
Total_exclusive	CPS1	1413000	2382100	5811900	NA	NA	NA
Total_exclusive	ASN2	3199300	1936800	586190	NA	NA	NA
Total_exclusive	SHS1	2046000	1133500	2816600	NA	NA	NA
Total_exclusive	APE2	743610	0	763800	NA	NA	NA
Total_exclusive	MCD4	2219900	885780	1764400	NA	NA	NA
Total_exclusive	HMT1	4860000	10304000	9483000	NA	NA	NA
Total_exclusive	YHR127W	4090600	7497000	7445100	NA	NA	NA
Total_exclusive	MLC1	6519100	4484800	4319600	NA	NA	NA
Total_exclusive	RRP6	2727800	878530	923480	NA	NA	NA
Total_exclusive	UTP23	9807900	8386400	8646400	NA	NA	NA
Total_exclusive	RNR2	3009000	711220	1047300	NA	NA	NA
Total_exclusive	THR4	1337000	544560	986880	NA	NA	NA
Total_exclusive	EMC1	945890	0	558010	NA	NA	NA
Total_exclusive	DNF1	300900	464840	876170	NA	NA	NA
Total_exclusive	COX13	8244000	9089600	11502000	NA	NA	NA
Total_exclusive	BOI1	606260	417190	0	NA	NA	NA
Total_exclusive	EIS1	2096400	2034700	1843000	NA	NA	NA
Total_exclusive	QCR7	9379400	8524200	3976400	NA	NA	NA
Total_exclusive	HIS4	173110	0	497850	NA	NA	NA
Total_exclusive	URA3	695240	844720	877930	NA	NA	NA
Total_exclusive	DST1	7691200	5890700	4427300	NA	NA	NA
Total_exclusive	RPB8	12235000	6226300	6692300	NA	NA	NA
Total_exclusive	SRP21	50301000	11279000	33543000	NA	NA	NA
Total_exclusive	TOR1	72714	44347	0	NA	NA	NA
Total_exclusive	ADE6	290100	293100	324900	NA	NA	NA
Total_exclusive	ARD1	18667000	5685900	6755100	NA	NA	NA
Total_exclusive	DRS1	108830	941300	144290	NA	NA	NA
Total_exclusive	CTP1	5169000	3860900	4865700	NA	NA	NA
Total_exclusive	MAM33	9707500	2217600	2685800	NA	NA	NA
Total_exclusive	YPQ1	11049000	17452000	25906000	NA	NA	NA
Total_exclusive	GAA1	3124700	1173800	2099500	NA	NA	NA
Total_exclusive	RET2	2358700	1886400	2581100	NA	NA	NA
Total_exclusive	NOP15	29131000	47102000	55349000	NA	NA	NA
Total_exclusive	YPT31	4270700	879400	0	NA	NA	NA
Total_exclusive	MOD5	1003200	123780	533240	NA	NA	NA
Total_exclusive	PRO1	3909000	1060100	3799400	NA	NA	NA
Total_exclusive	GCG1	7968900	5840000	7039000	NA	NA	NA
Total_exclusive	COX4	5645900	4310500	9661700	NA	NA	NA
Total_exclusive	FRS1	1630400	1162500	824180	NA	NA	NA
Total_exclusive	MRPL6	9247200	5597100	4506700	NA	NA	NA
Total_exclusive	PTC3	6751800	1290600	5543200	NA	NA	NA
Total_exclusive	MRPL11	3933900	5537300	4917300	NA	NA	NA
Total_exclusive	OTU2	9971200	4265300	21249000	NA	NA	NA
Total_exclusive	RKM2	820280	0	257550	NA	NA	NA
Total_exclusive	YHR122W	14710000	6206800	8320500	NA	NA	NA
Total_exclusive	SHE4	768660	192090	68155	NA	NA	NA
Total_exclusive	YMR295C	22959000	4755200	7063400	NA	NA	NA
Total_exclusive	HRT1	33207000	12654000	12165000	NA	NA	NA
Total_exclusive	TCD2	4491400	659070	741200	NA	NA	NA
Total_exclusive	STV1	69022	68603	971900	NA	NA	NA
Total_exclusive	LYS12	4058500	427680	245040	NA	NA	NA
Total_exclusive	POP1	714020	79892	90645	NA	NA	NA
Total_exclusive	YGL140C	1031000	174250	343930	NA	NA	NA
Total_exclusive	TPS1	2150100	0	967390	NA	NA	NA
Total_exclusive	TIM50	2688400	1160200	2052500	NA	NA	NA
Total_exclusive	FRE1	885640	2791000	3169400	NA	NA	NA
Total_exclusive	UTP30	4599200	3322700	2503300	NA	NA	NA
Total_exclusive	TAH11	398980	1112400	560640	NA	NA	NA
Total_exclusive	NPL3	8346600	2706100	0	NA	NA	NA
Total_exclusive	MHR1	10608000	3830800	3664200	NA	NA	NA
Total_exclusive	LAG1	7881800	828500	1345700	NA	NA	NA
Total_exclusive	MSH1	494240	469940	676520	NA	NA	NA
Total_exclusive	PRE2	8272300	2506100	3301600	NA	NA	NA
Total_exclusive	SRP40	46854000	41511000	48476000	NA	NA	NA
Total_exclusive	RKM3	2765900	1901800	807250	NA	NA	NA
Total_exclusive	RPN11	8319100	3016600	4076500	NA	NA	NA
Total_exclusive	SVL3	2147200	0	978140	NA	NA	NA
Total_exclusive	YDR476C	13462000	16189000	17001000	NA	NA	NA
Total_exclusive	SPC2	19640000	8769600	4991700	NA	NA	NA
Total_exclusive	RQC1	1185300	117810	149340	NA	NA	NA
Total_exclusive	YLH47	1200400	5090100	2958200	NA	NA	NA
Total_exclusive	GPB1	437630	306510	233750	NA	NA	NA
Total_exclusive	DPH6	1237700	1465600	1288200	NA	NA	NA
Total_exclusive	BGL2	10238000	13202000	15380000	NA	NA	NA
Total_exclusive	AAT2	1535300	0	666430	NA	NA	NA
Total_exclusive	CHD1	182110	954540	1991100	NA	NA	NA
Total_exclusive	DRS2	483230	195780	240800	NA	NA	NA
Total_exclusive	HSH155	636700	690360	928100	NA	NA	NA
Total_exclusive	DNF2	265780	359900	586310	NA	NA	NA
Total_exclusive	YDR089W	1748200	0	252830	NA	NA	NA
Total_exclusive	SPE3	4914500	1167400	3828400	NA	NA	NA
Total_exclusive	ORT1	8935400	1595500	3346000	NA	NA	NA
Total_exclusive	RQC2	763270	540510	215540	NA	NA	NA
Total_exclusive	VMA4	5487700	1091300	1678200	NA	NA	NA
Total_exclusive	ARG1	1285900	1118500	1186600	NA	NA	NA
Total_exclusive	RFA3	39290000	23676000	24089000	NA	NA	NA
Total_exclusive	URK1	1977200	1475000	1973400	NA	NA	NA
Total_exclusive	PHO8	11323000	0	5956100	NA	NA	NA
Total_exclusive	CST26	3043700	1500800	887340	NA	NA	NA
Total_exclusive	GCD10	4171100	1596900	5678600	NA	NA	NA
Total_exclusive	RLF2	1665200	2831100	434940	NA	NA	NA
Total_exclusive	SUI2	2070600	723380	1666400	NA	NA	NA
Total_exclusive	PRE8	13870000	13148000	14940000	NA	NA	NA
Total_exclusive	RVS161	1897100	978660	2653500	NA	NA	NA
Total_exclusive	SPT5	804900	608070	630300	NA	NA	NA
Total_exclusive	PRE3	8079600	8524200	7770400	NA	NA	NA
Total_exclusive	COX15	4322900	2111800	4473000	NA	NA	NA
Total_exclusive	EFM5	5686600	13202000	8679900	NA	NA	NA
Total_exclusive	RPM2	368400	54100	0	NA	NA	NA
Total_exclusive	RSM10	7714200	12842000	10660000	NA	NA	NA
Total_exclusive	TIM11	28416000	11734000	8865100	NA	NA	NA
Total_exclusive	TYR1	1762500	2087800	2315700	NA	NA	NA
Total_exclusive	GBP2	4076400	3067100	3834800	NA	NA	NA
Total_exclusive	PDC2	1601800	0	254940	NA	NA	NA
Total_exclusive	IPI1	3655900	927540	1546100	NA	NA	NA
Total_exclusive	VPS74	5858000	2787000	1848400	NA	NA	NA
Total_exclusive	SIT4	2284500	1752800	2491300	NA	NA	NA
Total_exclusive	CHA1	4374700	5857100	6183200	NA	NA	NA
Total_exclusive	VMA8	11356000	2554000	3917200	NA	NA	NA
Total_exclusive	HOC1	4740700	1530800	9075900	NA	NA	NA
Total_exclusive	ERV25	11165000	13167000	4824800	NA	NA	NA
Total_exclusive	MRPL1	4247300	2325200	1844200	NA	NA	NA
Total_exclusive	PRI1	1073000	516600	424290	NA	NA	NA
Total_exclusive	PTM1	6652400	4300000	4722200	NA	NA	NA
Total_exclusive	POL12	368260	462220	758160	NA	NA	NA
Total_exclusive	DBP6	1635000	2264100	1609900	NA	NA	NA
Total_exclusive	COG6	0	1083000	1931600	NA	NA	NA
Total_exclusive	RRP14	2163500	5322100	4186600	NA	NA	NA
Total_exclusive	ISC1	3870200	0	1660400	NA	NA	NA
Total_exclusive	SMB1	4471800	0	736630	NA	NA	NA
Total_exclusive	ELO3	14173000	793910	2680200	NA	NA	NA
Total_exclusive	LIA1	1655900	2519500	4073700	NA	NA	NA
Total_exclusive	ORC5	1970900	643300	1129000	NA	NA	NA
Total_exclusive	NNT1	16642000	254750000	13431000	NA	NA	NA
Total_exclusive	DUR1	66718	251610	277630	NA	NA	NA
Total_exclusive	PTR2	3223400	2552000	2117200	NA	NA	NA
Total_exclusive	TYS1	1005100	986280	586650	NA	NA	NA
Total_exclusive	SMC2	126820	464260	86609	NA	NA	NA
Total_exclusive	SPC3	12418000	8269000	5091700	NA	NA	NA
Total_exclusive	LSP1	5879300	2258200	7653500	NA	NA	NA
Total_exclusive	PHO90	652510	1158200	961490	NA	NA	NA
Total_exclusive	KRE6	1452100	582670	559440	NA	NA	NA
Total_exclusive	UGP1	2343300	3815100	4124500	NA	NA	NA
Total_exclusive	LCP5	4358500	2583300	2961200	NA	NA	NA
Total_exclusive	ERP1	14622000	5741200	4993700	NA	NA	NA
Total_exclusive	PST2	12730000	11595000	6569200	NA	NA	NA
Total_exclusive	SSF1	5339300	2244100	2327800	NA	NA	NA
Total_exclusive	HPR1	293330	253380	454750	NA	NA	NA
Total_exclusive	ARO2	3823400	1890000	1510900	NA	NA	NA
Total_exclusive	CDC3	4608700	0	361620	NA	NA	NA
Total_exclusive	SOF1	4998200	1534600	2199100	NA	NA	NA
Total_exclusive	GVP36	3311500	759110	2544900	NA	NA	NA
Total_exclusive	EBS1	751870	0	843850	NA	NA	NA
Total_exclusive	FMP42	3150400	0	847590	NA	NA	NA
Total_exclusive	ARP7	1186000	583970	694100	NA	NA	NA
Total_exclusive	PUB1	24099000	11888000	13355000	NA	NA	NA
Total_exclusive	RPC19	23123000	12847000	18596000	NA	NA	NA
Total_exclusive	TOM20	11742000	12495000	12333000	NA	NA	NA
Total_exclusive	CDC1	570760	0	1355800	NA	NA	NA
Total_exclusive	PUP1	7626700	4628100	7699500	NA	NA	NA
Total_exclusive	NPL6	0	1365100	1720800	NA	NA	NA
Total_exclusive	YPT7	5902200	4868200	4951700	NA	NA	NA
Total_exclusive	APL2	557030	0	563310	NA	NA	NA
Total_exclusive	IRR1	126280	0	192380	NA	NA	NA
Total_exclusive	RSM27	14247000	35876000	13704000	NA	NA	NA
Total_exclusive	SAM50	1612700	0	400150	NA	NA	NA
Total_exclusive	RRS1	7469900	16615000	16712000	NA	NA	NA
Total_exclusive	ARP8	0	144080	419700	NA	NA	NA
Total_exclusive	DSS4	8808700	5605600	6255200	NA	NA	NA
Total_exclusive	TAF14	3055300	2343700	4979200	NA	NA	NA
Total_exclusive	RPB3	3247100	283040	479020	NA	NA	NA
Total_exclusive	CDC12	2999700	1332100	2299200	NA	NA	NA
Total_exclusive	TIM54	1231800	242090	1045800	NA	NA	NA
Total_exclusive	YNR040W	3027200	781950	865910	NA	NA	NA
Total_exclusive	VBA4	7282100	4469400	7673800	NA	NA	NA
Total_exclusive	NPC2	7622700	64928000	59785000	NA	NA	NA
Total_exclusive	DCP1	6047900	4008200	3469300	NA	NA	NA
Total_exclusive	VAR1	1599800	734160	411950	NA	NA	NA
Total_exclusive	YME1	830860	232140	0	NA	NA	NA
Total_exclusive	RET3	7406900	6702300	6014400	NA	NA	NA
Total_exclusive	YLR287C	2335000	1020700	867910	NA	NA	NA
Total_exclusive	LCB5	954050	181860	325360	NA	NA	NA
Total_exclusive	TRM8	1345900	4945700	5014900	NA	NA	NA
Total_exclusive	HIS1	2304100	860010	0	NA	NA	NA
Total_exclusive	NDI1	824020	0	433760	NA	NA	NA
Total_exclusive	UTP11	4765100	3131800	3242400	NA	NA	NA
Total_exclusive	GLR1	924290	226620	998330	NA	NA	NA
Total_exclusive	NST1	757680	366070	664490	NA	NA	NA
Total_exclusive	RSC4	403590	784340	1012200	NA	NA	NA
Total_exclusive	TAF12	1057000	555760	828230	NA	NA	NA
Total_exclusive	TRM12	1092800	1588300	1931900	NA	NA	NA
Total_exclusive	SKT5	1840100	498430	91009	NA	NA	NA
Total_exclusive	MBP1	476030	0	952450	NA	NA	NA
Total_exclusive	STI1	879610	79310	39625	NA	NA	NA
Total_exclusive	FUR1	6805900	1700800	669810	NA	NA	NA
Total_exclusive	ZRC1	10410000	0	4260000	NA	NA	NA
Total_exclusive	RPC53	1607900	375460	1165100	NA	NA	NA
Total_exclusive	ANP1	3037800	0	1376700	NA	NA	NA
Total_exclusive	GAT1	1328900	0	963410	NA	NA	NA
Total_exclusive	MTR4	588040	0	287110	NA	NA	NA
Total_exclusive	HHO1	5994200	9656000	17230000	NA	NA	NA
Total_exclusive	FMP30	1034700	547200	1341700	NA	NA	NA
Total_exclusive	ESC1	126070	277390	283640	NA	NA	NA
Total_exclusive	YOS9	1931200	1038900	1188000	NA	NA	NA
Total_exclusive	ATP5	5419100	1486000	1582300	NA	NA	NA
Total_exclusive	GAP1	2400200	5280200	5855200	NA	NA	NA
Total_exclusive	MRPL15	8732200	9029700	4045200	NA	NA	NA
Total_exclusive	GLE2	4813700	1348900	662450	NA	NA	NA
Total_exclusive	SNU13	17511000	38116000	40982000	NA	NA	NA
Total_exclusive	GSP1	3029500	0	2391900	NA	NA	NA
Total_exclusive	SAM35	5319900	1717000	1216500	NA	NA	NA
Total_exclusive	TAL1	2314000	1629100	2267800	NA	NA	NA
Total_exclusive	RPB5	3562000	5227800	4608800	NA	NA	NA
Total_exclusive	RSA4	2282600	715220	1807900	NA	NA	NA
Total_exclusive	ERG2	26958000	22240000	10357000	NA	NA	NA
Total_exclusive	RIM1	4168000	9361200	17455000	NA	NA	NA
Total_exclusive	PBP2	3593400	565460	726840	NA	NA	NA
Total_exclusive	DMA1	2091700	2909500	1967700	NA	NA	NA
Total_exclusive	CCC1	4594000	2844600	3376100	NA	NA	NA
Total_exclusive	CCM1	477890	0	226470	NA	NA	NA
Total_exclusive	HUL5	664250	0	321240	NA	NA	NA
Total_exclusive	CPR6	2268200	2784900	2043900	NA	NA	NA
Total_exclusive	APL4	221340	0	220950	NA	NA	NA
Total_exclusive	BMT6	3103800	211090	0	NA	NA	NA
Total_exclusive	NUP53	2934800	673030	2293800	NA	NA	NA
Total_exclusive	PRP8	70324	0	269760	NA	NA	NA
Total_exclusive	TAO3	77830	339580	0	NA	NA	NA
Total_exclusive	GUP1	707920	2416800	1919900	NA	NA	NA
Total_exclusive	GYP5	431700	0	214010	NA	NA	NA
Total_exclusive	CBP3	1031600	1023500	1297800	NA	NA	NA
Total_exclusive	ORM1	1675500	8431300	7579800	NA	NA	NA
Total_exclusive	LYP1	583780	1398600	2308500	NA	NA	NA
Total_exclusive	HSP26	5483300	0	993640	NA	NA	NA
Total_exclusive	FUS3	3126400	2790700	0	NA	NA	NA
Total_exclusive	SEC14	2904500	361140	0	NA	NA	NA
Total_exclusive	RML2	3027900	1280400	1091900	NA	NA	NA
Total_exclusive	RSP5	771380	107190	76331	NA	NA	NA
Total_exclusive	ADI1	3283800	2226700	3270300	NA	NA	NA
Total_exclusive	MIC10	21470000	19529000	1608700	NA	NA	NA
Total_exclusive	CDC9	381080	330570	340520	NA	NA	NA
Total_exclusive	MRPL33	11194000	6726200	7605300	NA	NA	NA
Total_exclusive	CHS3	726750	395340	455240	NA	NA	NA
Total_exclusive	GEM1	414270	0	272120	NA	NA	NA
Total_exclusive	SEN1	91314	79681	286200	NA	NA	NA
Total_exclusive	TRS31	1427700	1612500	2453700	NA	NA	NA
Total_exclusive	NPR1	1021600	929190	933080	NA	NA	NA
Total_exclusive	ARC19	3472600	1907500	1614200	NA	NA	NA
Total_exclusive	RPA43	5127400	2636100	3234900	NA	NA	NA
Total_exclusive	APT1	1936200	3046900	1665000	NA	NA	NA
Total_exclusive	YGL117W	3419500	0	2916200	NA	NA	NA
Total_exclusive	SPN1	699370	353680	833350	NA	NA	NA
Total_exclusive	FMP10	3433800	1838600	0	NA	NA	NA
Total_exclusive	WRS1	316330	0	237100	NA	NA	NA
Total_exclusive	DPB11	6741600	0	951390	NA	NA	NA
Total_exclusive	SRV2	739300	334600	798610	NA	NA	NA
Total_exclusive	PRE7	1955200	3825000	3720600	NA	NA	NA
Total_exclusive	ARO4	1902800	1769700	1677100	NA	NA	NA
Total_exclusive	SQS1	668140	393870	251820	NA	NA	NA
Total_exclusive	ERV41	2721100	1454100	0	NA	NA	NA
Total_exclusive	WHI4	1861000	503610	0	NA	NA	NA
Total_exclusive	REX4	5284600	7521500	9554400	NA	NA	NA
Total_exclusive	MRPL23	2392300	7075100	4280000	NA	NA	NA
Total_exclusive	HRR25	453860	788660	971330	NA	NA	NA
Total_exclusive	CBP2	970930	0	293900	NA	NA	NA
Total_exclusive	STE5	846990	2107900	385680	NA	NA	NA
Total_exclusive	YBR287W	2939900	741470	2250300	NA	NA	NA
Total_exclusive	HFD1	692810	609280	1208200	NA	NA	NA
Total_exclusive	RSE1	476120	114480	116550	NA	NA	NA
Total_exclusive	NDC1	239340	819230	530610	NA	NA	NA
Total_exclusive	CYB5	36321000	28890000	24292000	NA	NA	NA
Total_exclusive	MUP1	4191500	2841500	2286200	NA	NA	NA
Total_exclusive	GAS5	1035100	0	940860	NA	NA	NA
Total_exclusive	BOI2	230670	594650	77252	NA	NA	NA
Total_exclusive	POP5	3144100	1329400	0	NA	NA	NA
Total_exclusive	SHE2	4519700	13140000	9455500	NA	NA	NA
Total_exclusive	SEA4	391210	0	107750	NA	NA	NA
Total_exclusive	CKB2	1554400	3500700	4010200	NA	NA	NA
Total_exclusive	ELP2	764080	417090	324210	NA	NA	NA
Total_exclusive	RSM26	3473700	2646400	2952100	NA	NA	NA
Total_exclusive	SAM3	4007000	3037600	4106700	NA	NA	NA
Total_exclusive	TAE1	4046700	5991400	9222200	NA	NA	NA
Total_exclusive	ORC3	180450	384590	0	NA	NA	NA
Total_exclusive	CTR9	65976	0	26645	NA	NA	NA
Total_exclusive	SFH1	2845800	3659000	5687300	NA	NA	NA
Total_exclusive	BUD21	753280	1893100	1784100	NA	NA	NA
Total_exclusive	PSK2	162470	0	145120	NA	NA	NA
Total_exclusive	UBA1	484760	0	325870	NA	NA	NA
Total_exclusive	VID27	126030	312650	632400	NA	NA	NA
Total_exclusive	MRPS16	10645000	11654000	13015000	NA	NA	NA
Total_exclusive	SLF1	2300600	0	831650	NA	NA	NA
Total_exclusive	RPN13	23644000	4835400	8010500	NA	NA	NA
Total_exclusive	SRB2	3430900	1119500	2053700	NA	NA	NA
Total_exclusive	RFT1	1160000	747470	1219700	NA	NA	NA
Total_exclusive	GCD14	1808900	0	2440000	NA	NA	NA
Total_exclusive	GPN3	7473800	4708100	0	NA	NA	NA
Total_exclusive	ALE1	788720	0	1371200	NA	NA	NA
Total_exclusive	SAC6	365230	643930	647070	NA	NA	NA
Total_exclusive	STE2	6486000	4614400	6663800	NA	NA	NA
Total_exclusive	PEP5	419330	177930	293590	NA	NA	NA
Total_exclusive	FCY2	3259200	6150500	3242400	NA	NA	NA
Total_exclusive	MET12	1647400	466910	453340	NA	NA	NA
Total_exclusive	MRH4	392840	580690	920030	NA	NA	NA
Total_exclusive	HDA1	113360	90146	116930	NA	NA	NA
Total_exclusive	ORC4	287250	0	184540	NA	NA	NA
Total_exclusive	CIR2	743680	989380	0	NA	NA	NA
Total_exclusive	NBP2	5172600	2308700	3875600	NA	NA	NA
Total_exclusive	TPT1	1277900	2545000	1886500	NA	NA	NA
Total_exclusive	BAT2	1095700	2278100	2635400	NA	NA	NA
Total_exclusive	LSB3	274450	313830	1075800	NA	NA	NA
Total_exclusive	SWI3	377840	344530	224840	NA	NA	NA
Total_exclusive	TOR2	40792	38099	0	NA	NA	NA
Total_exclusive	CYM1	321550	0	123930	NA	NA	NA
Total_exclusive	RER2	2163100	2765800	0	NA	NA	NA
Total_exclusive	VMA22	375440	2251500	4392800	NA	NA	NA
Total_exclusive	UPF3	387710	0	55680	NA	NA	NA
Total_exclusive	BAP3	0	135520	153150	NA	NA	NA
Total_exclusive	STE20	314710	874750	320640	NA	NA	NA
Total_exclusive	JIP5	0	2591000	4776400	NA	NA	NA
Total_exclusive	MDM38	0	279430	272700	NA	NA	NA
Total_exclusive	CDC53	616040	154100	0	NA	NA	NA
Total_exclusive	MPD1	3598100	0	86935	NA	NA	NA
Total_exclusive	ICE2	1117300	778930	595600	NA	NA	NA
Total_exclusive	PSP1	129420	179940	304580	NA	NA	NA
Total_exclusive	RHO1	0	3466000	4258500	NA	NA	NA
Total_exclusive	PCT1	1877100	1594200	1034700	NA	NA	NA
Total_exclusive	ITR1	2708600	394010	0	NA	NA	NA
Total_exclusive	SEC6	378490	168620	0	NA	NA	NA
Total_exclusive	MRPL38	4683900	2031600	7995900	NA	NA	NA
Total_exclusive	LSC1	1051900	374000	558370	NA	NA	NA
Total_exclusive	YEH1	514780	347530	292780	NA	NA	NA
Total_exclusive	ENV9	10511000	0	2503600	NA	NA	NA
Total_exclusive	VAC14	579650	0	273720	NA	NA	NA
Total_exclusive	SEC39	607010	209920	200550	NA	NA	NA
Total_exclusive	HIP1	1818400	0	200240	NA	NA	NA
Total_exclusive	CSC1	0	270540	134320	NA	NA	NA
Total_exclusive	SSP120	6008400	1238300	418390	NA	NA	NA
Total_exclusive	NBP35	3668800	3628900	0	NA	NA	NA
Total_exclusive	SGN1	4013400	1152600	1521400	NA	NA	NA
Total_exclusive	BET3	10541000	4025200	5042700	NA	NA	NA
Total_exclusive	SCC2	0	86825	65081	NA	NA	NA
Total_exclusive	SPT7	168830	67214	28821	NA	NA	NA
Total_exclusive	TAT1	79510	1437800	1101900	NA	NA	NA
Total_exclusive	AVT7	0	5833000	23944000	NA	NA	NA
Total_exclusive	RGR1	88684	241180	415640	NA	NA	NA
Total_exclusive	KCC4	166710	179680	0	NA	NA	NA
Total_exclusive	COF1	8047000	0	3827300	NA	NA	NA
Total_exclusive	SMD1	8259100	0	5241100	NA	NA	NA
Total_exclusive	CWH43	1862900	566540	1137800	NA	NA	NA
Total_exclusive	PET127	820140	67986	0	NA	NA	NA
Total_exclusive	TOD6	887130	0	1206200	NA	NA	NA
Total_exclusive	FCF2	4060300	2313200	0	NA	NA	NA
Total_exclusive	NUC1	2018900	1153000	821900	NA	NA	NA
Total_exclusive	PAM17	6741300	3087200	8037100	NA	NA	NA
Total_exclusive	LSO2	0	23067000	26116000	NA	NA	NA
Total_exclusive	PEP4	1463100	1699600	0	NA	NA	NA
Total_exclusive	YGL039W	533950	540910	905120	NA	NA	NA
Total_exclusive	FUN30	0	146320	189340	NA	NA	NA
Total_exclusive	BNI1	70433	118770	54670	NA	NA	NA
Total_exclusive	CIA1	3149400	906240	0	NA	NA	NA
Total_exclusive	RTT10	90981	0	37771	NA	NA	NA
Total_exclusive	LSM12	1831500	1139800	1968400	NA	NA	NA
Total_exclusive	CBP6	4647100	1139700	776710	NA	NA	NA
Total_exclusive	ATP17	14554000	12742000	18552000	NA	NA	NA
Total_exclusive	SUI3	930410	1915100	1014800	NA	NA	NA
Total_exclusive	RNQ1	5810200	3515500	3602400	NA	NA	NA
Total_exclusive	GRX7	134860	5145100	3686700	NA	NA	NA
Total_exclusive	VCX1	0	2318200	5977100	NA	NA	NA
Total_exclusive	TUP1	814880	0	70175	NA	NA	NA
Total_exclusive	MRPL36	2980500	0	182890	NA	NA	NA
Total_exclusive	BNA4	1318900	538720	1661700	NA	NA	NA
Total_exclusive	ECM1	4032900	3464900	12800000	NA	NA	NA
Total_exclusive	FTR1	0	3813800	4132000	NA	NA	NA
Total_exclusive	GPI8	1514600	1594500	1239100	NA	NA	NA
Total_exclusive	FCF1	2488600	0	8628900	NA	NA	NA
Total_exclusive	ERV29	4701600	0	6634700	NA	NA	NA
Total_exclusive	NHP6B	7981800	1910500	13253000	NA	NA	NA
Total_exclusive	CDC11	16191000	0	376170	NA	NA	NA
Total_exclusive	RSM22	781270	0	343850	NA	NA	NA
Total_exclusive	EFM2	2020100	698350	0	NA	NA	NA
Total_exclusive	MPM1	2858500	550580	0	NA	NA	NA
Total_exclusive	GYP8	681280	456120	0	NA	NA	NA
Total_exclusive	NVJ2	156110	230510	139690	NA	NA	NA
Total_exclusive	SOD1	3711200	6561000	4110300	NA	NA	NA
Total_exclusive	PSY2	263050	121160	1019600	NA	NA	NA
Total_exclusive	CYC1	212840	8031200	11229000	NA	NA	NA
Total_exclusive	SNF4	1351500	0	815050	NA	NA	NA
Total_exclusive	APE1	1745400	0	217920	NA	NA	NA
Total_exclusive	MRPL9	1821100	506650	0	NA	NA	NA
Total_exclusive	KIC1	356500	0	184360	NA	NA	NA
Total_exclusive	ADO1	1996500	1285800	1145200	NA	NA	NA
Total_exclusive	SKP1	2153000	0	596180	NA	NA	NA
Total_exclusive	ERG29	3971500	207970	0	NA	NA	NA
Total_exclusive	SMC4	38272	64985	17146	NA	NA	NA
Total_exclusive	MAS1	0	793700	757830	NA	NA	NA
Total_exclusive	MRPS8	5879200	2767800	3494000	NA	NA	NA
Total_exclusive	RSC30	257040	0	249170	NA	NA	NA
Total_exclusive	ARP5	928100	0	152870	NA	NA	NA
Total_exclusive	YLR407W	1776600	916320	0	NA	NA	NA
Total_exclusive	ALR1	320220	376170	0	NA	NA	NA
Total_exclusive	STE4	356270	777080	0	NA	NA	NA
Total_exclusive	YGR130C	497480	0	159940	NA	NA	NA
Total_exclusive	MNN5	396300	0	504700	NA	NA	NA
Total_exclusive	AHA1	564060	0	259650	NA	NA	NA
Total_exclusive	ALB1	0	14180000	16603000	NA	NA	NA
Total_exclusive	AIR1	1779900	0	830560	NA	NA	NA
Total_exclusive	MAK3	3014900	467790	0	NA	NA	NA
Total_exclusive	YPK3	1129500	0	176820	NA	NA	NA
Total_exclusive	ECM32	77624	155450	199050	NA	NA	NA
Total_exclusive	NUP159	79454	204660	295310	NA	NA	NA
Total_exclusive	RSC6	0	766880	1254700	NA	NA	NA
Total_exclusive	AIM24	348980	148020	0	NA	NA	NA
Total_exclusive	ZPR1	324030	0	21613	NA	NA	NA
Total_exclusive	DHH1	332640	0	147970	NA	NA	NA
Total_exclusive	EXO70	74122	456560	389460	NA	NA	NA
Total_exclusive	SNF1	135520	167670	262200	NA	NA	NA
Total_exclusive	MRX1	85065	188160	128080	NA	NA	NA
Total_exclusive	SUR7	2060900	1276400	1757300	NA	NA	NA
Total_exclusive	PPZ1	182420	136500	0	NA	NA	NA
Total_exclusive	ORC2	161240	38029	313020	NA	NA	NA
Total_exclusive	YMR099C	814530	0	3849000	NA	NA	NA
Total_exclusive	TRP4	0	651030	1570400	NA	NA	NA
Total_exclusive	SCM4	5219700	13673000	0	NA	NA	NA
Total_exclusive	NCE102	2377600	990570	9834100	NA	NA	NA
Total_exclusive	GET4	830360	238700	0	NA	NA	NA
Total_exclusive	HSH49	1376900	0	795490	NA	NA	NA
Total_exclusive	RSC58	178490	0	211700	NA	NA	NA
Total_exclusive	KEI1	5016100	7407300	0	NA	NA	NA
Total_exclusive	TPD3	233570	0	673280	NA	NA	NA
Total_exclusive	RRP17	1432800	3654000	5500800	NA	NA	NA
Total_exclusive	YIF1	0	1214900	663810	NA	NA	NA
Total_exclusive	RAD51	0	342150	1830100	NA	NA	NA
Total_exclusive	DPH1	0	324730	376240	NA	NA	NA
Total_exclusive	HRB1	571780	442980	468400	NA	NA	NA
Total_exclusive	DPB2	0	240950	62861	NA	NA	NA
Total_exclusive	NUP57	1018200	891160	0	NA	NA	NA
Total_exclusive	ERV2	0	2525600	5203900	NA	NA	NA
Total_exclusive	ATP7	1003900	1194000	376630	NA	NA	NA
Total_exclusive	MRPL31	4896200	1754800	0	NA	NA	NA
Total_exclusive	SPT3	0	989160	922610	NA	NA	NA
Total_exclusive	TAF9	3895200	1025700	0	NA	NA	NA
Total_exclusive	VPS64	350660	83722	0	NA	NA	NA
Total_exclusive	SYF1	211290	222970	0	NA	NA	NA
Total_exclusive	TAF10	3514700	0	1632600	NA	NA	NA
Total_exclusive	YGR054W	133660	129250	0	NA	NA	NA
Total_exclusive	WWM1	3683500	0	1813000	NA	NA	NA
Total_exclusive	RAS2	52362	148530	123090	NA	NA	NA
Total_exclusive	KIN4	0	130260	210220	NA	NA	NA
Total_exclusive	SPT14	0	512110	252870	NA	NA	NA
Total_exclusive	HAL9	327310	0	7443500	NA	NA	NA
Total_exclusive	REP2	1729400	657700	0	NA	NA	NA
Total_exclusive	RSC2	0	369860	245550	NA	NA	NA
Total_exclusive	AGP1	597070	580080	601330	NA	NA	NA
Total_exclusive	YKL023W	379560	612610	0	NA	NA	NA
Total_exclusive	ESS1	25435	786170	986120	NA	NA	NA
Total_exclusive	AYR1	0	194090	527330	NA	NA	NA
Total_exclusive	MIA40	234720	0	409960	NA	NA	NA
Total_exclusive	NAS6	1148600	0	984200	NA	NA	NA
Total_exclusive	YCR087C-A	0	3000800	2032000	NA	NA	NA
Detected_in_both	RPL3	3312400000	3242800000	3224800000	7744300000	4539200000	5507800000
Detected_in_both	ASC1	8041600000	7481100000	6789900000	7959400000	5680700000	6800000000
Detected_in_both	RPS1B	9095200000	7954800000	7716300000	11231000000	8566700000	11324000000
Detected_in_both	RPL8B	7089300000	7885000000	7691500000	7025400000	7893900000	13377000000
Detected_in_both	RPL4A	10026000000	11997000000	10465000000	17061000000	10210000000	11798000000
Detected_in_both	RPL5	5766500000	6355800000	5646600000	13740000000	5544500000	5761300000
Detected_in_both	RPP0	9750400000	10172000000	11015000000	11105000000	10714000000	13000000000
Detected_in_both	RPS4A	5336400000	5722800000	5318600000	8313100000	5916600000	6723500000
Detected_in_both	RPS3	10023000000	11549000000	10378000000	15092000000	12037000000	14219000000
Detected_in_both	RPL2B	6525300000	7421000000	8129100000	11192000000	7958000000	8829700000
Detected_in_both	RPS8B	7328700000	10092000000	9172700000	12885000000	11375000000	12983000000
Detected_in_both	FAS1	204330000	207430000	228950000	225340000	0	55907000
Detected_in_both	TEF1	3769900000	3123400000	3750000000	3012300000	7192000000	5076300000
Detected_in_both	FAS2	154980000	170980000	165880000	441290000	0	29855000
Detected_in_both	PMA1	1088400000	1540600000	1443800000	911260000	968410000	1225800000
Detected_in_both	RPL9A	6833400000	6161300000	5703300000	8705200000	1329500000	10209000000
Detected_in_both	RPL12A	9287600000	10397000000	9917900000	5667700000	4169800000	3789400000
Detected_in_both	RPS18A	10514000000	10168000000	11276000000	8410700000	11593000000	11917000000
Detected_in_both	RPS5	8804300000	7739500000	9674600000	14345000000	10206000000	12607000000
Detected_in_both	RPL1A	4651300000	5252500000	4680300000	4487800000	3438700000	4423600000
Detected_in_both	RPL7A	8599400000	8543000000	9157100000	12400000000	9719600000	11658000000
Detected_in_both	SSA2	946140000	677720000	654920000	327550000	0	94592000
Detected_in_both	RPL23A	6599700000	6005200000	6031400000	2668100000	2691000000	4950100000
Detected_in_both	CDC19	1321400000	1285600000	1597100000	1634400000	1468500000	2366400000
Detected_in_both	RPS14B	5690600000	8051100000	7965400000	7041300000	1623800000	5028200000
Detected_in_both	RPS22A	5441400000	6291200000	5577900000	4995100000	4301100000	3896500000
Detected_in_both	TDH3	901210000	1231200000	1260700000	651290000	1014700000	1200100000
Detected_in_both	RPL10	3300200000	2517200000	2983800000	6472500000	4047800000	4997600000
Detected_in_both	URA2	82463000	71025000	83378000	127150000	0	20383000
Detected_in_both	PDC1	907870000	855520000	939440000	612980000	900570000	917560000
Detected_in_both	EFT1	349630000	308030000	302870000	178530000	0	57711000
Detected_in_both	NAM7	317890000	264090000	295400000	8735200000	5721500000	8663200000
Detected_in_both	SSB1	1032700000	1091700000	1167500000	466620000	0	446630000
Detected_in_both	RPL17A	9377900000	9541500000	8807500000	11677000000	10645000000	13213000000
Detected_in_both	DED1	614260000	541450000	477900000	483940000	133630000	265660000
Detected_in_both	RPS2	5056800000	4435100000	4505900000	5229300000	3376600000	6481800000
Detected_in_both	YHR020W	603850000	697170000	645670000	581620000	286770000	486150000
Detected_in_both	RPS7A	5829800000	5043700000	4504400000	5610100000	3053900000	5310300000
Detected_in_both	RPS21B	3169000000	4063700000	3955500000	1220800000	0	835110000
Detected_in_both	RPS24A	6698400000	7189700000	6550400000	7167900000	6239200000	5583600000
Detected_in_both	YEF3	229230000	227600000	266300000	187160000	0	224830000
Detected_in_both	RPL18A	3497000000	3827700000	3899800000	5091700000	8484200000	7006200000
Detected_in_both	RPS0A	10401000000	10343000000	10369000000	11583000000	0	4435900000
Detected_in_both	RPS12	7723700000	7387800000	8026700000	2048500000	7400000000	6229000000
Detected_in_both	RPL20B	10287000000	10729000000	10220000000	11246000000	12420000000	14823000000
Detected_in_both	RPL14B	5325700000	4625200000	4273900000	4247300000	3795700000	5176700000
Detected_in_both	RPL24A	4919000000	4786600000	4502600000	7900300000	772640000	4452900000
Detected_in_both	RPL11A	5046600000	7030900000	8082600000	11693000000	10297000000	14914000000
Detected_in_both	SAM1	395340000	421670000	467970000	838840000	763010000	1120600000
Detected_in_both	RPL16B	4129500000	4515100000	4292900000	4919400000	4434200000	6074300000
Detected_in_both	RPS19A	4288400000	4760500000	4642400000	2931900000	1605800000	4881600000
Detected_in_both	ARO1	140390000	58994000	77709000	86158000	0	31424000
Detected_in_both	RPS23B	3271100000	2914000000	2414700000	2872400000	1157200000	1175200000
Detected_in_both	RPS9B	4438200000	5101200000	5108400000	5549300000	6666100000	5606800000
Detected_in_both	RPL6A	8827900000	7055700000	7288700000	9552900000	8907700000	9028500000
Detected_in_both	RPL6B	8647100000	6612200000	6690500000	9495400000	6400500000	7559600000
Detected_in_both	RPL25	10246000000	9216800000	8440900000	11131000000	8790200000	10524000000
Detected_in_both	NOP1	484310000	502490000	464970000	300940000	0	183850000
Detected_in_both	VMA2	388790000	323820000	360530000	422650000	57163000	251440000
Detected_in_both	RPL22A	4044100000	3935000000	3316100000	987970000	0	1166600000
Detected_in_both	KAP123	200640000	219660000	230450000	278940000	87073000	335140000
Detected_in_both	RPS31	2381900000	2080300000	2703300000	1980300000	4456300000	2687800000
Detected_in_both	RPS6B	7265000000	9583400000	9504600000	15302000000	14291000000	16519000000
Detected_in_both	RPS16B	5694400000	6196800000	7115400000	5399000000	4187500000	6519500000
Detected_in_both	RPL15A	7219800000	8304100000	9137900000	9141200000	33820000000	7731700000
Detected_in_both	RPL13B	6661000000	5988800000	5179800000	9180900000	4457800000	7309600000
Detected_in_both	RPS15	3333100000	2294700000	2497400000	1690100000	693840000	2869000000
Detected_in_both	RPL16A	3379100000	3069800000	3142800000	3607500000	3424100000	4959000000
Detected_in_both	RPS20	6477100000	8121500000	9524400000	8679200000	8148600000	13191000000
Detected_in_both	LEU2	1263400000	1396400000	1272500000	1460800000	1317100000	1471300000
Detected_in_both	RPL28	8830200000	9152000000	9485300000	5814500000	2163400000	6931000000
Detected_in_both	RPL27A	10483000000	10524000000	10325000000	13892000000	10020000000	7498100000
Detected_in_both	RPL21A	5428600000	5280500000	6062800000	6864400000	4450500000	9743700000
Detected_in_both	RPL30	5375500000	4279900000	3762200000	3383200000	1347900000	3463500000
Detected_in_both	RPL26B	5201400000	6006700000	6189600000	6841400000	4148000000	5321700000
Detected_in_both	ENO2	441560000	446610000	374320000	203410000	0	76650000
Detected_in_both	RPS17A	16529000000	11771000000	12484000000	10012000000	8462700000	16082000000
Detected_in_both	GFA1	121810000	126760000	127170000	121550000	0	30243000
Detected_in_both	RPL19B	10012000000	7576600000	9592500000	14282000000	11714000000	9872300000
Detected_in_both	RPS25B	1126600000	4587000000	4097900000	630010000	1008100000	1131600000
Detected_in_both	MES1	141170000	88727000	110210000	113850000	0	47497000
Detected_in_both	RPS11B	7326700000	8276900000	8795200000	10481000000	15251000000	13136000000
Detected_in_both	GUS1	69948000	135250000	177840000	43798000	7771200	69709000
Detected_in_both	RPS13	10514000000	10016000000	10321000000	8278400000	14424000000	11036000000
Detected_in_both	VMA1	80615000	85773000	77803000	69007000	0	22650000
Detected_in_both	LEU1	24117000	43148000	45947000	94368000	0	113180000
Detected_in_both	ILV2	101570000	134960000	135170000	127890000	0	65182000
Detected_in_both	YHB1	347000000	338580000	343810000	126770000	0	39204000
Detected_in_both	RPL32	5096000000	4199100000	3924300000	1821200000	2183700000	1613800000
Detected_in_both	APA1	743740000	574300000	585270000	107660000	0	133720000
Detected_in_both	NOP56	290520000	296990000	335820000	89451000	0	149190000
Detected_in_both	NOG1	155620000	122180000	139150000	55663000	0	16811000
Detected_in_both	MAE1	91878000	86975000	89195000	38976000	0	24608000
Detected_in_both	OLA1	297830000	349880000	325150000	212460000	0	218970000
Detected_in_both	ATP2	240680000	210620000	229200000	125800000	181230000	152860000
Detected_in_both	MIR1	672850000	505250000	438330000	422990000	0	542730000
Detected_in_both	RPL35B	6903200000	10334000000	10278000000	5340100000	4148500000	7343400000
Detected_in_both	ATP1	187070000	242220000	269730000	132380000	226990000	127210000
Detected_in_both	RPS28A	4222000000	5540700000	4650200000	2161600000	539700000	2094600000
Detected_in_both	CCT3	48406000	37968000	44198000	296280000	0	132030000
Detected_in_both	PET9	262520000	231340000	270450000	141400000	0	108710000
Detected_in_both	ACT1	96690000	95574000	209240000	31728000	2222400000	0
Detected_in_both	RPL33A	5785800000	4502300000	4399400000	4607600000	5135900000	4377800000
Detected_in_both	NOG2	92720000	89138000	91261000	70769000	0	17702000
Detected_in_both	URA7	74088000	58383000	63662000	48867000	0	2205900
Detected_in_both	ADH1	422890000	523580000	495980000	481320000	520130000	1167100000
Detected_in_both	GPM1	420190000	413630000	388930000	66893000	0	83867000
Detected_in_both	TEF4	272710000	344780000	343720000	240710000	182040000	445940000
Detected_in_both	LAT1	243160000	172630000	187990000	284750000	0	83985000
Detected_in_both	TUB2	202440000	141560000	125550000	97089000	0	24880000
Detected_in_both	SAH1	161260000	154580000	281480000	60500000	0	99312000
Detected_in_both	SXM1	30729000	44070000	44483000	14081000	0	5608800
Detected_in_both	RNA1	91790000	82730000	94139000	21178000	0	106520000
Detected_in_both	PSA1	86308000	98834000	135360000	77314000	0	89761000
Detected_in_both	RPL34B	4405000000	3219300000	3062000000	1596100000	2986100000	2501500000
Detected_in_both	RPS27A	16397000000	11647000000	10935000000	5232700000	5761800000	6236500000
Detected_in_both	YHM2	144840000	133360000	187670000	75374000	0	68225000
Detected_in_both	HHF1	797230000	1321000000	2079600000	386410000	16374000000	1055400000
Detected_in_both	RPL39	6732300000	5799500000	4537300000	4702000000	0	3113200000

## Sheet: UPF1-FLAG_upf2del
Detection	Protein	Total_1	Total_2	Total_3	IP_1	IP_2	IP_3
IP_exclusive	BCY1	NA	NA	NA	176150000	87694000	250480000
Total_exclusive	MDN1	12100000	12647000	9493100	NA	NA	NA
Total_exclusive	RPS10A	952170000	3680300000	3382600000	NA	NA	NA
Total_exclusive	FKS1	110560000	133170000	95038000	NA	NA	NA
Total_exclusive	RPG1	125080000	56572000	75019000	NA	NA	NA
Total_exclusive	RPL31A	9557900000	3964100000	8243700000	NA	NA	NA
Total_exclusive	UTP20	12572000	13867000	12482000	NA	NA	NA
Total_exclusive	DBP2	222560000	271340000	180160000	NA	NA	NA
Total_exclusive	PDA1	238340000	166120000	179990000	NA	NA	NA
Total_exclusive	YDJ1	445390000	708810000	480690000	NA	NA	NA
Total_exclusive	UTP10	33887000	36489000	28587000	NA	NA	NA
Total_exclusive	TY2B-C	53946000	67220000	60114000	NA	NA	NA
Total_exclusive	GLT1	21803000	29386000	17655000	NA	NA	NA
Total_exclusive	CLU1	35324000	17561000	26240000	NA	NA	NA
Total_exclusive	RRP12	52150000	63468000	54019000	NA	NA	NA
Total_exclusive	CDC39	14851000	13942000	14388000	NA	NA	NA
Total_exclusive	PDR5	54488000	73295000	51600000	NA	NA	NA
Total_exclusive	HSP60	192380000	161680000	138810000	NA	NA	NA
Total_exclusive	NUG1	217580000	171770000	179510000	NA	NA	NA
Total_exclusive	STM1	528450000	280190000	586360000	NA	NA	NA
Total_exclusive	CDC48	67958000	69524000	63521000	NA	NA	NA
Total_exclusive	SEC7	13940000	20691000	15031000	NA	NA	NA
Total_exclusive	CCT3	69538000	75593000	56316000	NA	NA	NA
Total_exclusive	HYP2	569640000	1005600000	691250000	NA	NA	NA
Total_exclusive	COP1	48021000	27991000	31813000	NA	NA	NA
Total_exclusive	NIP1	104070000	61016000	53816000	NA	NA	NA
Total_exclusive	PRT1	96063000	38848000	62536000	NA	NA	NA
Total_exclusive	NMD3	165690000	198080000	129120000	NA	NA	NA
Total_exclusive	PFK2	84994000	39193000	37069000	NA	NA	NA
Total_exclusive	CCT8	93637000	92998000	82038000	NA	NA	NA
Total_exclusive	DBP3	141580000	94636000	90010000	NA	NA	NA
Total_exclusive	TOM70	69595000	67988000	61307000	NA	NA	NA
Total_exclusive	SEC27	59953000	33248000	44675000	NA	NA	NA
Total_exclusive	PGK1	171880000	233300000	131490000	NA	NA	NA
Total_exclusive	CBF5	195710000	55891000	167510000	NA	NA	NA
Total_exclusive	POR1	340940000	312850000	308510000	NA	NA	NA
Total_exclusive	RRP5	7549300	17296000	6839700	NA	NA	NA
Total_exclusive	TY1A-DR2	92708000	187240000	170500000	NA	NA	NA
Total_exclusive	NSR1	208680000	179330000	166040000	NA	NA	NA
Total_exclusive	NOP58	170070000	102780000	111240000	NA	NA	NA
Total_exclusive	RVB1	150660000	151050000	120080000	NA	NA	NA
Total_exclusive	KAP95	92153000	61313000	89539000	NA	NA	NA
Total_exclusive	VPH1	73331000	96197000	57517000	NA	NA	NA
Total_exclusive	NEW1	18653000	14944000	15757000	NA	NA	NA
Total_exclusive	CHC1	15342000	10067000	8732500	NA	NA	NA
Total_exclusive	RPN2	43359000	22130000	24024000	NA	NA	NA
Total_exclusive	NAN1	44237000	53140000	43085000	NA	NA	NA
Total_exclusive	ECM29	7195600	7983900	6714500	NA	NA	NA
Total_exclusive	MET10	24049000	32848000	19162000	NA	NA	NA
Total_exclusive	KRE33	26036000	21182000	18475000	NA	NA	NA
Total_exclusive	SRO9	95107000	57975000	120170000	NA	NA	NA
Total_exclusive	SEC26	46715000	44503000	31942000	NA	NA	NA
Total_exclusive	TIF4631	17808000	17575000	25860000	NA	NA	NA
Total_exclusive	FAA1	61503000	63317000	61103000	NA	NA	NA
Total_exclusive	ARX1	85715000	101640000	79490000	NA	NA	NA
Total_exclusive	GCD6	39496000	52268000	36268000	NA	NA	NA
Total_exclusive	MSS116	29195000	30005000	23237000	NA	NA	NA
Total_exclusive	NUP192	11760000	13342000	8095200	NA	NA	NA
Total_exclusive	HAS1	88993000	80152000	55977000	NA	NA	NA
Total_exclusive	YTM1	106060000	165800000	98937000	NA	NA	NA
Total_exclusive	PSE1	28815000	20177000	31808000	NA	NA	NA
Total_exclusive	SEC18	42655000	55078000	37181000	NA	NA	NA
Total_exclusive	SRP72	67547000	76786000	55015000	NA	NA	NA
Total_exclusive	RPA135	23239000	22876000	13991000	NA	NA	NA
Total_exclusive	KAR2	189530000	157990000	160360000	NA	NA	NA
Total_exclusive	SCP160	12038000	18481000	9866200	NA	NA	NA
Total_exclusive	MAK21	29615000	16448000	26601000	NA	NA	NA
Total_exclusive	SAC1	38584000	51830000	37889000	NA	NA	NA
Total_exclusive	ILV1	28619000	48213000	36316000	NA	NA	NA
Total_exclusive	RPT5	81654000	69986000	43712000	NA	NA	NA
Total_exclusive	TRM3	12480000	8060000	5818900	NA	NA	NA
Total_exclusive	POL5	24209000	27557000	21547000	NA	NA	NA
Total_exclusive	TCP1	57111000	56437000	41298000	NA	NA	NA
Total_exclusive	FBA1	110770000	127110000	162430000	NA	NA	NA
Total_exclusive	PDB1	1332400000	436050000	447010000	NA	NA	NA
Total_exclusive	RPB2	18976000	16033000	15081000	NA	NA	NA
Total_exclusive	TRM1	32363000	50496000	40846000	NA	NA	NA
Total_exclusive	OLE1	81074000	97952000	74757000	NA	NA	NA
Total_exclusive	RPC40	108730000	103440000	103820000	NA	NA	NA
Total_exclusive	SEC63	52533000	53455000	47569000	NA	NA	NA
Total_exclusive	SXM1	40818000	52474000	40511000	NA	NA	NA
Total_exclusive	MIC60	43577000	53935000	45248000	NA	NA	NA
Total_exclusive	IKI3	10944000	16865000	12593000	NA	NA	NA
Total_exclusive	CPA2	18633000	19962000	26291000	NA	NA	NA
Total_exclusive	SKI3	8960000	8511100	4862800	NA	NA	NA
Total_exclusive	DOP1	8476900	9065600	7298000	NA	NA	NA
Total_exclusive	URB1	7953500	2662000	4054000	NA	NA	NA
Total_exclusive	NOP4	38146000	33028000	32322000	NA	NA	NA
Total_exclusive	NUP170	8280000	10775000	7508300	NA	NA	NA
Total_exclusive	SEC21	33515000	21233000	29499000	NA	NA	NA
Total_exclusive	CCT7	65209000	60529000	34484000	NA	NA	NA
Total_exclusive	CCT5	62832000	52382000	34251000	NA	NA	NA
Total_exclusive	CCT6	63861000	41251000	31582000	NA	NA	NA
Total_exclusive	RPS26A	3370500000	1807200000	4163200000	NA	NA	NA
Total_exclusive	RPT1	62052000	54090000	46751000	NA	NA	NA
Total_exclusive	ARC1	110870000	93813000	109530000	NA	NA	NA
Total_exclusive	TUB3	110350000	146300000	126580000	NA	NA	NA
Total_exclusive	FUN12	11649000	14781000	16414000	NA	NA	NA
Total_exclusive	UTP22	9636900	11045000	7791700	NA	NA	NA
Total_exclusive	RPT3	83751000	80044000	73815000	NA	NA	NA
Total_exclusive	NUM1	6379700	5309100	8058800	NA	NA	NA
Total_exclusive	SSC1	57121000	32357000	66079000	NA	NA	NA
Total_exclusive	RBG1	94748000	104760000	101280000	NA	NA	NA
Total_exclusive	VAS1	11966000	13018000	10501000	NA	NA	NA
Total_exclusive	ARB1	88480000	129400000	90323000	NA	NA	NA
Total_exclusive	TIF34	117170000	51899000	68635000	NA	NA	NA
Total_exclusive	LPD1	56427000	28480000	53695000	NA	NA	NA
Total_exclusive	CYS4	38523000	37181000	35547000	NA	NA	NA
Total_exclusive	ILS1	11918000	13624000	11367000	NA	NA	NA
Total_exclusive	LCB1	61408000	65901000	50308000	NA	NA	NA
Total_exclusive	BMS1	12894000	17529000	11931000	NA	NA	NA
Total_exclusive	RPA190	12346000	6646600	5815600	NA	NA	NA
Total_exclusive	ACS2	46659000	64276000	33810000	NA	NA	NA
Total_exclusive	NUP157	6975900	10411000	4789500	NA	NA	NA
Total_exclusive	QCR2	47570000	36883000	40051000	NA	NA	NA
Total_exclusive	MIS1	13658000	13110000	13649000	NA	NA	NA
Total_exclusive	ALD6	31668000	40848000	50359000	NA	NA	NA
Total_exclusive	RPS29B	1567500000	1423500000	1531400000	NA	NA	NA
Total_exclusive	GCD1	39796000	50094000	33268000	NA	NA	NA
Total_exclusive	TOP2	8616700	10102000	5328100	NA	NA	NA
Total_exclusive	RPS29A	1255200000	1227300000	1381100000	NA	NA	NA
Total_exclusive	TCB1	12591000	20973000	13488000	NA	NA	NA
Total_exclusive	TCB3	10380000	11480000	8492400	NA	NA	NA
Total_exclusive	THS1	39348000	19051000	21958000	NA	NA	NA
Total_exclusive	EBP2	52114000	24546000	45307000	NA	NA	NA
Total_exclusive	SKI2	9665100	8985900	4342700	NA	NA	NA
Total_exclusive	CCT2	20710000	18577000	15668000	NA	NA	NA
Total_exclusive	RPT4	53134000	69138000	43939000	NA	NA	NA
Total_exclusive	MAK5	23574000	28782000	13328000	NA	NA	NA
Total_exclusive	SDA1	33567000	25146000	24252000	NA	NA	NA
Total_exclusive	RIX7	17890000	15116000	18165000	NA	NA	NA
Total_exclusive	PWP2	19790000	13468000	15488000	NA	NA	NA
Total_exclusive	NOP12	27423000	38168000	40184000	NA	NA	NA
Total_exclusive	NMD5	14572000	24527000	12854000	NA	NA	NA
Total_exclusive	UTP8	55304000	47221000	39092000	NA	NA	NA
Total_exclusive	NOP2	47456000	39623000	31433000	NA	NA	NA
Total_exclusive	SSE1	23247000	18990000	17210000	NA	NA	NA
Total_exclusive	VMA6	91761000	153980000	77117000	NA	NA	NA
Total_exclusive	RPT2	97756000	66070000	61177000	NA	NA	NA
Total_exclusive	CSE1	14512000	14371000	17514000	NA	NA	NA
Total_exclusive	CDC28	64579000	78158000	58470000	NA	NA	NA
Total_exclusive	CHO2	19558000	26437000	12678000	NA	NA	NA
Total_exclusive	SPB1	18450000	24976000	16910000	NA	NA	NA
Total_exclusive	DPS1	33338000	22075000	20219000	NA	NA	NA
Total_exclusive	CIC1	69007000	66323000	75078000	NA	NA	NA
Total_exclusive	RRB1	84615000	67876000	65545000	NA	NA	NA
Total_exclusive	NCL1	14111000	20947000	12033000	NA	NA	NA
Total_exclusive	SPF1	25040000	12229000	9871600	NA	NA	NA
Total_exclusive	ALA1	17426000	41483000	36917000	NA	NA	NA
Total_exclusive	RRP3	27882000	27840000	24090000	NA	NA	NA
Total_exclusive	UTP13	26782000	20985000	19576000	NA	NA	NA
Total_exclusive	PUS1	26950000	24330000	25531000	NA	NA	NA
Total_exclusive	MCM4	10950000	15282000	7882700	NA	NA	NA
Total_exclusive	SAS10	38798000	38719000	33012000	NA	NA	NA
Total_exclusive	RVB2	41572000	56323000	46919000	NA	NA	NA
Total_exclusive	RPL42A	124030000	63194000	166410000	NA	NA	NA
Total_exclusive	YCF1	12562000	8894600	6287400	NA	NA	NA
Total_exclusive	BCP1	92608000	105450000	79590000	NA	NA	NA
Total_exclusive	NOC2	27415000	14423000	24226000	NA	NA	NA
Total_exclusive	TRM5	27069000	39140000	29790000	NA	NA	NA
Total_exclusive	RIX1	12338000	20466000	14300000	NA	NA	NA
Total_exclusive	RKR1	5795200	5146400	3637200	NA	NA	NA
Total_exclusive	HCA4	20332000	14670000	14673000	NA	NA	NA
Total_exclusive	SSZ1	24196000	24234000	32287000	NA	NA	NA
Total_exclusive	SSD1	121420000	214840000	116380000	NA	NA	NA
Total_exclusive	COR1	25935000	33234000	23433000	NA	NA	NA
Total_exclusive	IDH1	109670000	176720000	100040000	NA	NA	NA
Total_exclusive	TIF1	53901000	52739000	47903000	NA	NA	NA
Total_exclusive	GEA2	5719900	6495700	4404500	NA	NA	NA
Total_exclusive	MCM6	8741800	8333400	9932600	NA	NA	NA
Total_exclusive	GGC1	70775000	200060000	174520000	NA	NA	NA
Total_exclusive	PGI1	32122000	35684000	41012000	NA	NA	NA
Total_exclusive	MPP10	25082000	17741000	24474000	NA	NA	NA
Total_exclusive	EGD2	259870000	332480000	315750000	NA	NA	NA
Total_exclusive	NUP133	10402000	9156800	6978400	NA	NA	NA
Total_exclusive	LCB2	43732000	83575000	60284000	NA	NA	NA
Total_exclusive	URB2	9307700	3764600	2952300	NA	NA	NA
Total_exclusive	TMA46	64414000	61708000	53390000	NA	NA	NA
Total_exclusive	MET6	8789000	5249300	9966200	NA	NA	NA
Total_exclusive	ERG11	43484000	42222000	28077000	NA	NA	NA
Total_exclusive	RIA1	3838600	3901100	3427900	NA	NA	NA
Total_exclusive	DED81	52379000	43733000	33678000	NA	NA	NA
Total_exclusive	TCB2	6034100	9531700	8453200	NA	NA	NA
Total_exclusive	UTP15	29391000	31378000	24595000	NA	NA	NA
Total_exclusive	MCM5	11646000	8773400	7406800	NA	NA	NA
Total_exclusive	GDH1	23279000	26026000	21659000	NA	NA	NA
Total_exclusive	ACO2	74608000	12438000	17523000	NA	NA	NA
Total_exclusive	RPT6	83899000	71309000	60839000	NA	NA	NA
Total_exclusive	AAH1	55594000	70510000	62714000	NA	NA	NA
Total_exclusive	ERG27	59199000	92522000	62438000	NA	NA	NA
Total_exclusive	PDX1	30017000	9358000	25196000	NA	NA	NA
Total_exclusive	SEC13	79464000	114010000	80182000	NA	NA	NA
Total_exclusive	LSG1	12446000	19841000	9884900	NA	NA	NA
Total_exclusive	STT4	3187700	3200300	2995700	NA	NA	NA
Total_exclusive	BEM2	2057200	1561400	1919000	NA	NA	NA
Total_exclusive	MSN5	6003500	6518500	5159200	NA	NA	NA
Total_exclusive	PWP1	25237000	15522000	21957000	NA	NA	NA
Total_exclusive	MET18	9505200	7790000	6056400	NA	NA	NA
Total_exclusive	ILV5	49466000	32601000	37290000	NA	NA	NA
Total_exclusive	KAP104	16667000	24764000	25464000	NA	NA	NA
Total_exclusive	NUP188	4760800	3254100	3263800	NA	NA	NA
Total_exclusive	TRP3	38123000	44362000	24365000	NA	NA	NA
Total_exclusive	RET1	7053600	8509600	4871000	NA	NA	NA
Total_exclusive	TRM732	4515200	4705900	3266000	NA	NA	NA
Total_exclusive	BRX1	86102000	75596000	65536000	NA	NA	NA
Total_exclusive	CPA1	42331000	36548000	41675000	NA	NA	NA
Total_exclusive	LOS1	11488000	13773000	9585400	NA	NA	NA
Total_exclusive	UTP21	13353000	15329000	8557100	NA	NA	NA
Total_exclusive	DBP9	18051000	10741000	11754000	NA	NA	NA
Total_exclusive	PUF6	29265000	18659000	23378000	NA	NA	NA
Total_exclusive	TRP2	32788000	34957000	28867000	NA	NA	NA
Total_exclusive	XRN1	4654400	5085800	4125500	NA	NA	NA
Total_exclusive	KRI1	21918000	14712000	14026000	NA	NA	NA
Total_exclusive	KRS1	30637000	18646000	17274000	NA	NA	NA
Total_exclusive	MON2	3286000	3875300	3527400	NA	NA	NA
Total_exclusive	NOP9	16978000	16683000	11899000	NA	NA	NA
Total_exclusive	PAA1	62919000	142040000	71666000	NA	NA	NA
Total_exclusive	ERG1	36411000	71876000	36492000	NA	NA	NA
Total_exclusive	IPI3	15596000	17855000	14827000	NA	NA	NA
Total_exclusive	ERG26	50228000	62436000	58035000	NA	NA	NA
Total_exclusive	RRP8	32429000	50333000	25110000	NA	NA	NA
Total_exclusive	RNR1	19424000	19850000	12491000	NA	NA	NA
Total_exclusive	PRS1	75010000	38859000	47676000	NA	NA	NA
Total_exclusive	RLI1	18890000	22784000	17851000	NA	NA	NA
Total_exclusive	CDC60	3269300	5730800	4264300	NA	NA	NA
Total_exclusive	PGA3	72842000	79747000	49758000	NA	NA	NA
Total_exclusive	RPF1	43933000	60523000	53505000	NA	NA	NA
Total_exclusive	YDR341C	10114000	6574300	5327300	NA	NA	NA
Total_exclusive	RSM23	15870000	14811000	11721000	NA	NA	NA
Total_exclusive	MCM2	6435600	8438900	5620500	NA	NA	NA
Total_exclusive	AAT1	18782000	27098000	18670000	NA	NA	NA
Total_exclusive	UTP4	16221000	9390300	9981100	NA	NA	NA
Total_exclusive	MSS51	6105800	8562900	5037500	NA	NA	NA
Total_exclusive	SNQ2	8080400	7378500	7662900	NA	NA	NA
Total_exclusive	RPN7	44068000	33851000	19339000	NA	NA	NA
Total_exclusive	YNR021W	66950000	90393000	62597000	NA	NA	NA
Total_exclusive	RRP9	14477000	15437000	14603000	NA	NA	NA
Total_exclusive	SHM1	20496000	18551000	30616000	NA	NA	NA
Total_exclusive	GCD2	32453000	28886000	33292000	NA	NA	NA
Total_exclusive	HOM2	44358000	81092000	56696000	NA	NA	NA
Total_exclusive	GCD7	46333000	43511000	41772000	NA	NA	NA
Total_exclusive	RLP7	142590000	96172000	137770000	NA	NA	NA
Total_exclusive	UTP6	12497000	18375000	8313700	NA	NA	NA
Total_exclusive	DIP2	8955500	9000100	6356200	NA	NA	NA
Total_exclusive	NOT3	8556000	10692000	8208700	NA	NA	NA
Total_exclusive	MCM3	6061400	23093000	4167400	NA	NA	NA
Total_exclusive	BMH1	42929000	65018000	27752000	NA	NA	NA
Total_exclusive	ERG5	16269000	12152000	11226000	NA	NA	NA
Total_exclusive	TIF35	68150000	42469000	33006000	NA	NA	NA
Total_exclusive	CEX1	13682000	11293000	8184300	NA	NA	NA
Total_exclusive	NSA1	16827000	16902000	13108000	NA	NA	NA
Total_exclusive	EMW1	8074000	9495300	4728300	NA	NA	NA
Total_exclusive	FPR4	93921000	74312000	69153000	NA	NA	NA
Total_exclusive	ERG9	35338000	43432000	27527000	NA	NA	NA
Total_exclusive	SGD1	9757100	13458000	4474700	NA	NA	NA
Total_exclusive	MRPL3	16713000	15564000	10717000	NA	NA	NA
Total_exclusive	RPP1B	946480000	2522800000	1213700000	NA	NA	NA
Total_exclusive	NOC3	16434000	9319400	10857000	NA	NA	NA
Total_exclusive	CBR1	27292000	25695000	24919000	NA	NA	NA
Total_exclusive	NOP13	3146600	4458800	5863100	NA	NA	NA
Total_exclusive	DPM1	62810000	59367000	67184000	NA	NA	NA
Total_exclusive	NUP120	10896000	9010200	4796700	NA	NA	NA
Total_exclusive	SYO1	22778000	31241000	29236000	NA	NA	NA
Total_exclusive	KAP122	11127000	12226000	10305000	NA	NA	NA
Total_exclusive	IST2	13230000	5038800	11892000	NA	NA	NA
Total_exclusive	HGH1	21490000	21434000	21876000	NA	NA	NA
Total_exclusive	YOL098C	11413000	10967000	6005500	NA	NA	NA
Total_exclusive	PIM1	2883700	6388100	1609800	NA	NA	NA
Total_exclusive	TYW1	11048000	9330100	7850600	NA	NA	NA
Total_exclusive	TIF6	593930000	837760000	566860000	NA	NA	NA
Total_exclusive	RRP1	38894000	77322000	36430000	NA	NA	NA
Total_exclusive	RMT2	46007000	69013000	48488000	NA	NA	NA
Total_exclusive	RPL37A	9768400	4566200	6032100	NA	NA	NA
Total_exclusive	LYS4	7076300	3608900	5043000	NA	NA	NA
Total_exclusive	GCN3	52673000	74131000	56157000	NA	NA	NA
Total_exclusive	TOM40	49032000	51895000	36290000	NA	NA	NA
Total_exclusive	PMT2	13864000	15612000	13015000	NA	NA	NA
Total_exclusive	ETT1	49500000	88050000	45626000	NA	NA	NA
Total_exclusive	WBP1	36632000	38252000	33657000	NA	NA	NA
Total_exclusive	PIL1	68066000	63306000	60702000	NA	NA	NA
Total_exclusive	YVH1	16791000	13369000	36016000	NA	NA	NA
Total_exclusive	GPP1	57186000	59924000	49388000	NA	NA	NA
Total_exclusive	MCX1	17825000	11992000	17526000	NA	NA	NA
Total_exclusive	GND1	9623300	10935000	13711000	NA	NA	NA
Total_exclusive	NIC96	6486100	11780000	1785400	NA	NA	NA
Total_exclusive	YPP1	9175300	10486000	5964700	NA	NA	NA
Total_exclusive	TUF1	8858300	10338000	9039200	NA	NA	NA
Total_exclusive	UTP9	16529000	18569000	13036000	NA	NA	NA
Total_exclusive	MSH2	3384400	6016500	4899500	NA	NA	NA
Total_exclusive	BFR1	9199300	7670600	8604100	NA	NA	NA
Total_exclusive	MRN1	15099000	25486000	9816900	NA	NA	NA
Total_exclusive	PHO88	54994000	6670500	45327000	NA	NA	NA
Total_exclusive	FPR3	188440000	79671000	173430000	NA	NA	NA
Total_exclusive	SFB2	8144200	2654400	4661600	NA	NA	NA
Total_exclusive	ELP3	12396000	19972000	12855000	NA	NA	NA
Total_exclusive	RPO31	2278200	4104300	1911700	NA	NA	NA
Total_exclusive	GNP1	15922000	31290000	19864000	NA	NA	NA
Total_exclusive	TKL1	20997000	11626000	8862600	NA	NA	NA
Total_exclusive	SHM2	19802000	15962000	11578000	NA	NA	NA
Total_exclusive	UTP7	10612000	8323300	13622000	NA	NA	NA
Total_exclusive	SEC53	31009000	57665000	25699000	NA	NA	NA
Total_exclusive	DLD3	25776000	11050000	11014000	NA	NA	NA
Total_exclusive	YRA1	54764000	127380000	77842000	NA	NA	NA
Total_exclusive	GAR1	155920000	249370000	169440000	NA	NA	NA
Total_exclusive	PPM2	5936100	11882000	5338700	NA	NA	NA
Total_exclusive	NAB6	4589000	8130700	2606500	NA	NA	NA
Total_exclusive	GSF2	44350000	49039000	41641000	NA	NA	NA
Total_exclusive	SCL1	19050000	24219000	16170000	NA	NA	NA
Total_exclusive	SEC23	9515600	12204000	9033700	NA	NA	NA
Total_exclusive	VTC4	4814400	6042800	6023500	NA	NA	NA
Total_exclusive	ALG9	19397000	26653000	21728000	NA	NA	NA
Total_exclusive	MCM7	7555700	6400400	4943000	NA	NA	NA
Total_exclusive	REI1	20791000	24654000	13651000	NA	NA	NA
Total_exclusive	SES1	13210000	22000000	18590000	NA	NA	NA
Total_exclusive	PHB1	27170000	29797000	23812000	NA	NA	NA
Total_exclusive	YML6	26593000	32877000	21695000	NA	NA	NA
Total_exclusive	GUA1	14634000	21816000	12745000	NA	NA	NA
Total_exclusive	ADE3	8987200	3019300	3528600	NA	NA	NA
Total_exclusive	GCD11	11679000	5834500	16783000	NA	NA	NA
Total_exclusive	AFG2	6279400	6835300	6581600	NA	NA	NA
Total_exclusive	UBA4	22324000	31545000	16668000	NA	NA	NA
Total_exclusive	YTA12	2852200	5274600	2103400	NA	NA	NA
Total_exclusive	HXK2	7948800	8119400	8494900	NA	NA	NA
Total_exclusive	SCH9	11604000	16536000	9047700	NA	NA	NA
Total_exclusive	YKR018C	11437000	11293000	5061900	NA	NA	NA
Total_exclusive	TRA1	744990	649250	340510	NA	NA	NA
Total_exclusive	NCP1	8336000	10359000	6726100	NA	NA	NA
Total_exclusive	PNO1	34584000	34467000	20767000	NA	NA	NA
Total_exclusive	YMC1	21665000	21098000	28543000	NA	NA	NA
Total_exclusive	RPN3	20623000	8209000	8329000	NA	NA	NA
Total_exclusive	GCN20	10487000	41185000	14215000	NA	NA	NA
Total_exclusive	NUP85	8249600	5132400	3129400	NA	NA	NA
Total_exclusive	NOC4	18984000	24688000	10168000	NA	NA	NA
Total_exclusive	RPP1A	73263000	129010000	214100000	NA	NA	NA
Total_exclusive	NAT1	8652100	3003100	5091100	NA	NA	NA
Total_exclusive	SPT16	2411600	3340300	2015600	NA	NA	NA
Total_exclusive	PYC2	3958900	6303400	4122500	NA	NA	NA
Total_exclusive	TMA19	153100000	243700000	182050000	NA	NA	NA
Total_exclusive	DIM1	34536000	29183000	20358000	NA	NA	NA
Total_exclusive	MRH1	48671000	54944000	86179000	NA	NA	NA
Total_exclusive	SEC28	48217000	43802000	49156000	NA	NA	NA
Total_exclusive	NAM9	7436100	7858900	6071800	NA	NA	NA
Total_exclusive	MOT1	1479200	1888700	940290	NA	NA	NA
Total_exclusive	MDJ1	9702200	9356300	9092400	NA	NA	NA
Total_exclusive	NDE1	4260200	1817400	3904900	NA	NA	NA
Total_exclusive	PMT4	10563000	11189000	8625200	NA	NA	NA
Total_exclusive	ARO8	14575000	11978000	12079000	NA	NA	NA
Total_exclusive	MTR10	5353200	7975600	4702000	NA	NA	NA
Total_exclusive	VAC8	13032000	9211700	11492000	NA	NA	NA
Total_exclusive	TPI1	43374000	84014000	70830000	NA	NA	NA
Total_exclusive	GLY1	11706000	24284000	17601000	NA	NA	NA
Total_exclusive	DCP2	6294700	5910900	5558000	NA	NA	NA
Total_exclusive	RCM1	11588000	9471700	8864900	NA	NA	NA
Total_exclusive	UBP3	9396300	4597200	7290000	NA	NA	NA
Total_exclusive	MBF1	46762000	54946000	50190000	NA	NA	NA
Total_exclusive	IMP4	30328000	24079000	16258000	NA	NA	NA
Total_exclusive	DBP10	5509000	52687000	1825400	NA	NA	NA
Total_exclusive	NUP145	4265200	2372900	2141000	NA	NA	NA
Total_exclusive	OST1	29528000	39362000	29828000	NA	NA	NA
Total_exclusive	RSC8	6926100	6099200	5861900	NA	NA	NA
Total_exclusive	GAS1	39250000	16839000	22649000	NA	NA	NA
Total_exclusive	MKT1	5698600	6548600	3740900	NA	NA	NA
Total_exclusive	SPB4	7523700	9316100	5126400	NA	NA	NA
Total_exclusive	CCR4	10985000	13387000	8564500	NA	NA	NA
Total_exclusive	KAP120	7295300	9829500	6116200	NA	NA	NA
Total_exclusive	CKA2	26742000	35814000	17058000	NA	NA	NA
Total_exclusive	TIF5	20712000	11907000	14124000	NA	NA	NA
Total_exclusive	MET17	13519000	15947000	16020000	NA	NA	NA
Total_exclusive	SRP101	7400400	15157000	6990700	NA	NA	NA
Total_exclusive	PRS3	30859000	24216000	23424000	NA	NA	NA
Total_exclusive	BFR2	7978800	5341700	2680600	NA	NA	NA
Total_exclusive	MAK16	41728000	35684000	23116000	NA	NA	NA
Total_exclusive	VPS1	5326800	2449300	2897500	NA	NA	NA
Total_exclusive	VTC2	3667000	2665500	3307600	NA	NA	NA
Total_exclusive	DPL1	3319100	5269700	3609700	NA	NA	NA
Total_exclusive	EMG1	15553000	20579000	13662000	NA	NA	NA
Total_exclusive	PMR1	8211000	5919200	3369800	NA	NA	NA
Total_exclusive	KTR3	12191000	24340000	9720400	NA	NA	NA
Total_exclusive	PRE5	43192000	38876000	45696000	NA	NA	NA
Total_exclusive	EGD1	13873000	157210000	48264000	NA	NA	NA
Total_exclusive	NSA2	69974000	94779000	37245000	NA	NA	NA
Total_exclusive	SEH1	17502000	22863000	15372000	NA	NA	NA
Total_exclusive	LYS21	8734600	12552000	8043900	NA	NA	NA
Total_exclusive	MGM101	14849000	11136000	14173000	NA	NA	NA
Total_exclusive	ATP3	26059000	8501600	23336000	NA	NA	NA
Total_exclusive	PHB2	31315000	13646000	14588000	NA	NA	NA
Total_exclusive	MRPL35	14654000	18873000	14069000	NA	NA	NA
Total_exclusive	SLC1	30576000	36150000	36007000	NA	NA	NA
Total_exclusive	POM152	1083600	1599800	807940	NA	NA	NA
Total_exclusive	ROK1	6693800	9796300	4615800	NA	NA	NA
Total_exclusive	CTR86	6291000	6389900	5191000	NA	NA	NA
Total_exclusive	PDI1	5301800	5404900	2864500	NA	NA	NA
Total_exclusive	RPN8	22297000	11075000	10515000	NA	NA	NA
Total_exclusive	DEF1	10385000	11542000	25968000	NA	NA	NA
Total_exclusive	DBP8	6338600	23802000	11239000	NA	NA	NA
Total_exclusive	MNN11	12495000	15647000	8366900	NA	NA	NA
Total_exclusive	NOP16	16812000	28707000	56600000	NA	NA	NA
Total_exclusive	MRPS35	12020000	21924000	11338000	NA	NA	NA
Total_exclusive	SPT15	36821000	29505000	31023000	NA	NA	NA
Total_exclusive	MRP4	8571300	9984100	7436800	NA	NA	NA
Total_exclusive	SSM4	3878200	8818500	5390900	NA	NA	NA
Total_exclusive	NIP7	38302000	40706000	38219000	NA	NA	NA
Total_exclusive	RIP1	50820000	32084000	33513000	NA	NA	NA
Total_exclusive	MRPL24	15834000	18528000	11633000	NA	NA	NA
Total_exclusive	SSH1	49335000	76787000	38337000	NA	NA	NA
Total_exclusive	HTB2	54281000	99314000	96658000	NA	NA	NA
Total_exclusive	RPN5	12603000	5846700	4146100	NA	NA	NA
Total_exclusive	UTP18	23325000	5424300	16157000	NA	NA	NA
Total_exclusive	MET5	4057600	2724600	1941300	NA	NA	NA
Total_exclusive	BRE5	10047000	2969500	8301700	NA	NA	NA
Total_exclusive	RPN9	12608000	9141500	11106000	NA	NA	NA
Total_exclusive	CDC33	26768000	58596000	49855000	NA	NA	NA
Total_exclusive	RFC1	3841000	3604800	3965500	NA	NA	NA
Total_exclusive	GPI16	11143000	14063000	9985400	NA	NA	NA
Total_exclusive	PRE9	29809000	32533000	22308000	NA	NA	NA
Total_exclusive	TSC13	25035000	47219000	29763000	NA	NA	NA
Total_exclusive	ALG2	11895000	14310000	10402000	NA	NA	NA
Total_exclusive	RCL1	15378000	23728000	17657000	NA	NA	NA
Total_exclusive	RPP2A	85733000	182240000	473860000	NA	NA	NA
Total_exclusive	CAM1	40529000	82385000	66275000	NA	NA	NA
Total_exclusive	RPC82	8280800	3418800	5157500	NA	NA	NA
Total_exclusive	RFC5	15736000	24828000	12487000	NA	NA	NA
Total_exclusive	RFC3	9975500	16525000	12784000	NA	NA	NA
Total_exclusive	VMA13	2136200	6789500	4055700	NA	NA	NA
Total_exclusive	NOP14	4394500	3528800	4281100	NA	NA	NA
Total_exclusive	STT3	11707000	10852000	6559700	NA	NA	NA
Total_exclusive	PUF3	7200100	8146200	5963400	NA	NA	NA
Total_exclusive	RPS30B	817670000	0	776310000	NA	NA	NA
Total_exclusive	SIS1	15178000	722460	12156000	NA	NA	NA
Total_exclusive	PUP2	34947000	46307000	31305000	NA	NA	NA
Total_exclusive	OSH3	3067400	1406100	1102000	NA	NA	NA
Total_exclusive	TAF6	5057100	3125800	5097800	NA	NA	NA
Total_exclusive	UFD4	1912500	1552800	1882000	NA	NA	NA
Total_exclusive	BEM4	2706500	5224600	2609800	NA	NA	NA
Total_exclusive	ODC2	33412000	47149000	40576000	NA	NA	NA
Total_exclusive	PBY1	3683800	6106500	3772000	NA	NA	NA
Total_exclusive	LAA1	935830	2295700	964150	NA	NA	NA
Total_exclusive	POL1	1189800	2344700	1344500	NA	NA	NA
Total_exclusive	MYO4	2485500	3083200	956170	NA	NA	NA
Total_exclusive	PUF4	8657300	11086000	10912000	NA	NA	NA
Total_exclusive	EFB1	38343000	91539000	49845000	NA	NA	NA
Total_exclusive	SCS2	34616000	70321000	45598000	NA	NA	NA
Total_exclusive	HEM1	2803000	9572800	3469500	NA	NA	NA
Total_exclusive	KRR1	8002700	11192000	16311000	NA	NA	NA
Total_exclusive	AAP1	16475000	783190	1776300	NA	NA	NA
Total_exclusive	EDC3	10987000	13478000	9672700	NA	NA	NA
Total_exclusive	SMC3	2234500	3954200	1067700	NA	NA	NA
Total_exclusive	YMC2	16276000	9518200	11550000	NA	NA	NA
Total_exclusive	PDR12	4043400	1850300	2143100	NA	NA	NA
Total_exclusive	SDH1	5665000	6896000	5567800	NA	NA	NA
Total_exclusive	TSA1	34407000	60431000	37296000	NA	NA	NA
Total_exclusive	THR1	32230000	17175000	20441000	NA	NA	NA
Total_exclusive	SRP54	19172000	21162000	14238000	NA	NA	NA
Total_exclusive	SEC10	2700000	1577200	2039400	NA	NA	NA
Total_exclusive	COX2	49080000	25703000	53821000	NA	NA	NA
Total_exclusive	MRP7	10679000	13626000	5935300	NA	NA	NA
Total_exclusive	SLY1	4294600	4095100	3674600	NA	NA	NA
Total_exclusive	OXP1	2543000	2776500	1551100	NA	NA	NA
Total_exclusive	LOC1	80243000	60663000	54724000	NA	NA	NA
Total_exclusive	RTN1	23768000	21803000	22137000	NA	NA	NA
Total_exclusive	COG4	2271500	2467700	2715000	NA	NA	NA
Total_exclusive	HMG2	10035000	9946400	7304900	NA	NA	NA
Total_exclusive	LIP5	10515000	17874000	14076000	NA	NA	NA
Total_exclusive	TPA1	1764000	2379800	2901700	NA	NA	NA
Total_exclusive	ARG5	1626800	4692500	2783500	NA	NA	NA
Total_exclusive	YPL245W	5731500	7749400	7947500	NA	NA	NA
Total_exclusive	GLC7	14379000	8588100	14032000	NA	NA	NA
Total_exclusive	CYT1	34048000	31824000	20058000	NA	NA	NA
Total_exclusive	TSR1	6744000	7856200	5933700	NA	NA	NA
Total_exclusive	MRPL40	16547000	12239000	14135000	NA	NA	NA
Total_exclusive	PRP43	4967700	3079300	2924400	NA	NA	NA
Total_exclusive	HMO1	81860000	117570000	146490000	NA	NA	NA
Total_exclusive	PDS5	1386900	3112700	1424000	NA	NA	NA
Total_exclusive	RSM24	8337700	11731000	8116000	NA	NA	NA
Total_exclusive	PMT1	5625900	893460	5366400	NA	NA	NA
Total_exclusive	LYS9	4688700	5535200	6141800	NA	NA	NA
Total_exclusive	RKM4	11791000	7593900	13928000	NA	NA	NA
Total_exclusive	SUP35	5825900	14316000	4757700	NA	NA	NA
Total_exclusive	ERG6	9119900	13531000	8281600	NA	NA	NA
Total_exclusive	RFC2	11437000	12183000	10434000	NA	NA	NA
Total_exclusive	RSC3	2787600	3220000	2862100	NA	NA	NA
Total_exclusive	GET3	31739000	45271000	32638000	NA	NA	NA
Total_exclusive	NUP82	2299200	4926100	2139400	NA	NA	NA
Total_exclusive	MRD1	1681200	1179000	1678800	NA	NA	NA
Total_exclusive	ERG4	25704000	10593000	25642000	NA	NA	NA
Total_exclusive	ARF1	30902000	21147000	31695000	NA	NA	NA
Total_exclusive	COQ1	9337200	4705100	8832500	NA	NA	NA
Total_exclusive	MRPS28	10139000	10658000	9065700	NA	NA	NA
Total_exclusive	ILV6	25215000	19575000	16430000	NA	NA	NA
Total_exclusive	IMP3	23168000	12964000	16123000	NA	NA	NA
Total_exclusive	NOP8	9862000	3573700	6723100	NA	NA	NA
Total_exclusive	POL3	1594900	1132400	2978600	NA	NA	NA
Total_exclusive	TOM71	2347500	13334000	3245100	NA	NA	NA
Total_exclusive	MNN1	2007300	3152200	1469500	NA	NA	NA
Total_exclusive	TRS120	1323500	2379300	1230500	NA	NA	NA
Total_exclusive	SEC61	32652000	47520000	33842000	NA	NA	NA
Total_exclusive	TOM1	524960	189970	226120	NA	NA	NA
Total_exclusive	NSP1	579890	2245800	1005600	NA	NA	NA
Total_exclusive	PRO3	25810000	41696000	25274000	NA	NA	NA
Total_exclusive	CLA4	3279600	2177600	2816400	NA	NA	NA
Total_exclusive	SCJ1	10434000	11143000	9365400	NA	NA	NA
Total_exclusive	MRPL7	10088000	23240000	14650000	NA	NA	NA
Total_exclusive	NEO1	1087700	1072900	520010	NA	NA	NA
Total_exclusive	APL5	4262800	2357700	1812300	NA	NA	NA
Total_exclusive	URE2	9829500	14060000	9611800	NA	NA	NA
Total_exclusive	UTP5	18450000	19323000	11663000	NA	NA	NA
Total_exclusive	NOP6	24988000	16093000	24740000	NA	NA	NA
Total_exclusive	TRP5	2290600	3333300	4052300	NA	NA	NA
Total_exclusive	NAP1	9859700	17285000	6640800	NA	NA	NA
Total_exclusive	ERJ5	29080000	38282000	22858000	NA	NA	NA
Total_exclusive	PHO86	17623000	18156000	18100000	NA	NA	NA
Total_exclusive	MRPS17	18995000	24573000	15596000	NA	NA	NA
Total_exclusive	ACO1	3788300	6255800	4337100	NA	NA	NA
Total_exclusive	YGR210C	5121200	7340200	8730100	NA	NA	NA
Total_exclusive	IML2	3434400	6517100	3810600	NA	NA	NA
Total_exclusive	MRP51	8246300	6596100	4936300	NA	NA	NA
Total_exclusive	RIO1	11976000	17822000	11635000	NA	NA	NA
Total_exclusive	PPH22	6201000	10981000	10371000	NA	NA	NA
Total_exclusive	CDC10	2694800	2102500	4281200	NA	NA	NA
Total_exclusive	CYS3	15561000	24343000	19414000	NA	NA	NA
Total_exclusive	NHP2	50042000	0	116280000	NA	NA	NA
Total_exclusive	SRP14	31237000	57120000	33956000	NA	NA	NA
Total_exclusive	RMD9	4183600	4394500	4040100	NA	NA	NA
Total_exclusive	GPD2	4939500	12559000	7183800	NA	NA	NA
Total_exclusive	ENP2	6942000	3224800	2561400	NA	NA	NA
Total_exclusive	ERG25	118610000	168480000	103650000	NA	NA	NA
Total_exclusive	SMY2	4577800	2868100	2245400	NA	NA	NA
Total_exclusive	MEU1	17437000	37837000	15796000	NA	NA	NA
Total_exclusive	PRE10	24382000	18251000	20425000	NA	NA	NA
Total_exclusive	BPT1	1554500	1421800	655610	NA	NA	NA
Total_exclusive	SEC4	18505000	29212000	17637000	NA	NA	NA
Total_exclusive	KTR1	5777200	7192600	4925200	NA	NA	NA
Total_exclusive	MRPL4	10324000	15868000	13104000	NA	NA	NA
Total_exclusive	TAF5	3424500	7583000	2189200	NA	NA	NA
Total_exclusive	REH1	18712000	8190100	10125000	NA	NA	NA
Total_exclusive	RPN6	14245000	12668000	7706000	NA	NA	NA
Total_exclusive	IMG1	18366000	25075000	18082000	NA	NA	NA
Total_exclusive	SOD2	14910000	42995000	35605000	NA	NA	NA
Total_exclusive	ILV3	4106600	4484500	4048600	NA	NA	NA
Total_exclusive	ERV46	8853500	20690000	7239600	NA	NA	NA
Total_exclusive	POL30	18292000	1488100	8638500	NA	NA	NA
Total_exclusive	MRPL17	9859600	8766900	7137000	NA	NA	NA
Total_exclusive	FAP7	14260000	49055000	27812000	NA	NA	NA
Total_exclusive	EMP70	6033600	9425700	5167700	NA	NA	NA
Total_exclusive	EXO84	3466000	2702500	1640800	NA	NA	NA
Total_exclusive	YLR419W	953240	927680	800800	NA	NA	NA
Total_exclusive	SQT1	37779000	66251000	31365000	NA	NA	NA
Total_exclusive	MRPS9	16752000	14127000	17937000	NA	NA	NA
Total_exclusive	RTS1	7881300	8064500	5034400	NA	NA	NA
Total_exclusive	NPA3	18890000	11687000	23721000	NA	NA	NA
Total_exclusive	JJJ1	4611600	7151400	3291500	NA	NA	NA
Total_exclusive	MSH6	1417900	1737700	1335400	NA	NA	NA
Total_exclusive	SEC65	16270000	17395000	12946000	NA	NA	NA
Total_exclusive	RIM2	15183000	17069000	12981000	NA	NA	NA
Total_exclusive	PET123	13324000	22645000	10635000	NA	NA	NA
Total_exclusive	PET10	5267900	2685300	11716000	NA	NA	NA
Total_exclusive	CDS1	223850000	71120000	15400000	NA	NA	NA
Total_exclusive	PBP1	5205300	3970900	2498000	NA	NA	NA
Total_exclusive	MRPL13	13442000	6440900	11219000	NA	NA	NA
Total_exclusive	SCS7	19200000	42311000	30186000	NA	NA	NA
Total_exclusive	FSF1	13503000	20502000	20329000	NA	NA	NA
Total_exclusive	GIN4	1453700	1218600	939010	NA	NA	NA
Total_exclusive	CAF40	10497000	0	12497000	NA	NA	NA
Total_exclusive	EFR3	4776700	2884800	1883200	NA	NA	NA
Total_exclusive	GPI17	10168000	17403000	10014000	NA	NA	NA
Total_exclusive	GPN2	10654000	13146000	14723000	NA	NA	NA
Total_exclusive	MRP1	17392000	23071000	18165000	NA	NA	NA
Total_exclusive	VMA5	4209800	7608100	2269000	NA	NA	NA
Total_exclusive	RPF2	18714000	30463000	15952000	NA	NA	NA
Total_exclusive	APM3	7868200	6616600	4691100	NA	NA	NA
Total_exclusive	RIO2	6624500	12259000	9484700	NA	NA	NA
Total_exclusive	PRS5	8241800	8590200	5578000	NA	NA	NA
Total_exclusive	SEC3	1195500	1362600	643040	NA	NA	NA
Total_exclusive	MRPL8	11299000	18011000	11647000	NA	NA	NA
Total_exclusive	DBP7	2513500	2969500	1763700	NA	NA	NA
Total_exclusive	POP2	12036000	9356900	9580000	NA	NA	NA
Total_exclusive	AFG3	1151500	4396700	287110	NA	NA	NA
Total_exclusive	RNR4	7846700	6040100	6318200	NA	NA	NA
Total_exclusive	YGR266W	2062700	2871500	1801200	NA	NA	NA
Total_exclusive	HEH2	2549500	1940600	3263200	NA	NA	NA
Total_exclusive	ARP2	10851000	14197000	14271000	NA	NA	NA
Total_exclusive	RFC4	8897400	9924700	5333200	NA	NA	NA
Total_exclusive	ERG10	5020400	2738900	6789600	NA	NA	NA
Total_exclusive	CKI1	6855600	8759300	5934400	NA	NA	NA
Total_exclusive	PHO84	2502800	0	17274000	NA	NA	NA
Total_exclusive	VPS35	1262300	2302400	3047600	NA	NA	NA
Total_exclusive	DHR2	3441600	3039600	2335800	NA	NA	NA
Total_exclusive	SEC31	3614200	1283800	1530400	NA	NA	NA
Total_exclusive	EMC2	8007600	6013200	4070600	NA	NA	NA
Total_exclusive	HCH1	27752000	25162000	6739600	NA	NA	NA
Total_exclusive	RLP24	153340000	185190000	135040000	NA	NA	NA
Total_exclusive	NOT5	7610200	12711000	8615600	NA	NA	NA
Total_exclusive	ENA1	5141800	2468800	2938400	NA	NA	NA
Total_exclusive	FRS2	3972800	2513800	1747600	NA	NA	NA
Total_exclusive	PEP1	1018500	1967200	965070	NA	NA	NA
Total_exclusive	MRPL10	4806500	7903900	9445200	NA	NA	NA
Total_exclusive	HLJ1	21485000	36420000	18091000	NA	NA	NA
Total_exclusive	LCB4	2100300	5383800	3127300	NA	NA	NA
Total_exclusive	ATP4	10410000	15220000	8832400	NA	NA	NA
Total_exclusive	SST2	4361300	2170200	4065400	NA	NA	NA
Total_exclusive	IDI1	13550000	1578700	11220000	NA	NA	NA
Total_exclusive	SEC15	3200300	3006100	2117500	NA	NA	NA
Total_exclusive	HXT2	13270000	21505000	11592000	NA	NA	NA
Total_exclusive	YOR1	1523700	1215800	772100	NA	NA	NA
Total_exclusive	RBG2	3864500	8626900	2600300	NA	NA	NA
Total_exclusive	RPO21	2391900	2365200	1474200	NA	NA	NA
Total_exclusive	PRE1	17415000	9340400	11961000	NA	NA	NA
Total_exclusive	YBT1	2338700	1252400	640020	NA	NA	NA
Total_exclusive	SAP185	1178300	1283200	1007600	NA	NA	NA
Total_exclusive	KRE2	4942300	7682000	3613600	NA	NA	NA
Total_exclusive	WHI3	13822000	3291600	10135000	NA	NA	NA
Total_exclusive	MNN10	8295600	8901000	2885400	NA	NA	NA
Total_exclusive	YGR250C	2114600	3048900	1424800	NA	NA	NA
Total_exclusive	IPP1	5557300	5137800	6138100	NA	NA	NA
Total_exclusive	OPI3	51523000	41596000	42626000	NA	NA	NA
Total_exclusive	DUN1	1858800	4460900	2722200	NA	NA	NA
Total_exclusive	HOM3	4235200	5040300	3233500	NA	NA	NA
Total_exclusive	SAR1	19431000	23048000	20380000	NA	NA	NA
Total_exclusive	RDH54	2470600	845110	1208000	NA	NA	NA
Total_exclusive	BAT1	7035800	13981000	6766300	NA	NA	NA
Total_exclusive	YBP2	3685500	4832800	3416000	NA	NA	NA
Total_exclusive	LOA1	16964000	20108000	20808000	NA	NA	NA
Total_exclusive	BUD20	17569000	57174000	19311000	NA	NA	NA
Total_exclusive	RPC34	6915200	17336000	7731700	NA	NA	NA
Total_exclusive	GEA1	684730	2190700	568590	NA	NA	NA
Total_exclusive	NUP84	2764300	3850900	2029600	NA	NA	NA
Total_exclusive	ARE2	8628500	17099000	7024700	NA	NA	NA
Total_exclusive	MRPL22	10950000	9352800	6497900	NA	NA	NA
Total_exclusive	NSG2	18474000	13671000	12776000	NA	NA	NA
Total_exclusive	RSN1	4910300	18011000	8915500	NA	NA	NA
Total_exclusive	VPS29	15080000	9555400	15104000	NA	NA	NA
Total_exclusive	XDJ1	1581000	1181600	3645800	NA	NA	NA
Total_exclusive	BLM10	712750	568050	319680	NA	NA	NA
Total_exclusive	YPT1	15571000	23448000	15606000	NA	NA	NA
Total_exclusive	ZUO1	5977800	9957200	3330800	NA	NA	NA
Total_exclusive	MNN9	10215000	11468000	6907100	NA	NA	NA
Total_exclusive	EMP47	18914000	10621000	9155100	NA	NA	NA
Total_exclusive	SRP1	3620000	306070000	4864000	NA	NA	NA
Total_exclusive	DAS2	21385000	32685000	24920000	NA	NA	NA
Total_exclusive	INO80	2260500	710420	1220500	NA	NA	NA
Total_exclusive	SEC5	1419700	1475300	815320	NA	NA	NA
Total_exclusive	VPS13	99525	550550	204560	NA	NA	NA
Total_exclusive	CDC34	15151000	6489400	17984000	NA	NA	NA
Total_exclusive	SRP102	13252000	13722000	10237000	NA	NA	NA
Total_exclusive	FAA3	3733100	14619000	4499000	NA	NA	NA
Total_exclusive	COG3	1641600	1918800	1027500	NA	NA	NA
Total_exclusive	ARP9	3709300	4694500	2672300	NA	NA	NA
Total_exclusive	ALG11	2826200	5342100	2276300	NA	NA	NA
Total_exclusive	RPA49	5337700	4026100	3340900	NA	NA	NA
Total_exclusive	RSM28	4688000	4244300	6788900	NA	NA	NA
Total_exclusive	MET3	9335000	5828200	2155700	NA	NA	NA
Total_exclusive	AHP1	13231000	31735000	16622000	NA	NA	NA
Total_exclusive	RSM7	3040900	5671600	7512100	NA	NA	NA
Total_exclusive	HHT1	217550000	0	43786000	NA	NA	NA
Total_exclusive	MRPS5	10776000	14830000	15077000	NA	NA	NA
Total_exclusive	EPS1	1569000	4137500	2077500	NA	NA	NA
Total_exclusive	MRPL49	10691000	7913900	11709000	NA	NA	NA
Total_exclusive	RSC9	1852300	1437100	1448100	NA	NA	NA
Total_exclusive	YMR310C	16536000	6341300	5888600	NA	NA	NA
Total_exclusive	CPR1	15213000	31333000	14623000	NA	NA	NA
Total_exclusive	SEC62	18764000	34448000	13549000	NA	NA	NA
Total_exclusive	USO1	772070	233680	265780	NA	NA	NA
Total_exclusive	STH1	973190	693920	460060	NA	NA	NA
Total_exclusive	COY1	812800	395560	592720	NA	NA	NA
Total_exclusive	BUD23	49682000	65679000	29782000	NA	NA	NA
Total_exclusive	RPN12	8460100	10854000	6681800	NA	NA	NA
Total_exclusive	APL6	2333300	559530	1243300	NA	NA	NA
Total_exclusive	UBX2	5834400	6897900	6691400	NA	NA	NA
Total_exclusive	GLN4	885610	773990	349030	NA	NA	NA
Total_exclusive	SEC11	15340000	20314000	17734000	NA	NA	NA
Total_exclusive	LTV1	11217000	9774700	13821000	NA	NA	NA
Total_exclusive	TBF1	6308200	6369400	3052300	NA	NA	NA
Total_exclusive	DFM1	21739000	6282700	10678000	NA	NA	NA
Total_exclusive	ASN1	3219300	6615200	5401000	NA	NA	NA
Total_exclusive	HST2	6514900	8987700	7357200	NA	NA	NA
Total_exclusive	ARP4	4748200	4877400	2601900	NA	NA	NA
Total_exclusive	ACL4	2898000	13923000	9898900	NA	NA	NA
Total_exclusive	ERG20	2579000	2926100	6779700	NA	NA	NA
Total_exclusive	GPA1	3028500	3666600	2037900	NA	NA	NA
Total_exclusive	RPP1	8153900	5976300	5877500	NA	NA	NA
Total_exclusive	ASG1	1308400	3538600	595430	NA	NA	NA
Total_exclusive	SAM37	5596800	5638800	4584000	NA	NA	NA
Total_exclusive	PGM1	21230000	0	2226000	NA	NA	NA
Total_exclusive	CCA1	3403700	4367400	4094900	NA	NA	NA
Total_exclusive	PUP3	36218000	0	42212000	NA	NA	NA
Total_exclusive	ALG5	6403100	20238000	8037000	NA	NA	NA
Total_exclusive	MPH1	487350	615750	483990	NA	NA	NA
Total_exclusive	NUP116	1111600	2563300	1636100	NA	NA	NA
Total_exclusive	VTC3	0	110190	205980	NA	NA	NA
Total_exclusive	IDP1	3318700	1449200	1681800	NA	NA	NA
Total_exclusive	MGR1	2880700	6238100	2147100	NA	NA	NA
Total_exclusive	SCT1	3134000	3402100	2528000	NA	NA	NA
Total_exclusive	MRPS18	7003700	5909300	11579000	NA	NA	NA
Total_exclusive	TOM22	25401000	50045000	30547000	NA	NA	NA
Total_exclusive	TRM82	4920100	4691400	2555200	NA	NA	NA
Total_exclusive	NOP53	6388500	3144000	987100	NA	NA	NA
Total_exclusive	EFG1	29024000	21158000	23352000	NA	NA	NA
Total_exclusive	FSH3	5804100	18681000	12521000	NA	NA	NA
Total_exclusive	ERG3	12714000	8636300	9737000	NA	NA	NA
Total_exclusive	MRP20	8218800	8271200	9927500	NA	NA	NA
Total_exclusive	LST8	9169400	3441100	13189000	NA	NA	NA
Total_exclusive	COG8	1695000	2324600	957120	NA	NA	NA
Total_exclusive	NTE1	992540	858500	1449900	NA	NA	NA
Total_exclusive	ERG12	11372000	1423600	2306500	NA	NA	NA
Total_exclusive	HOM6	3602900	2722800	3754300	NA	NA	NA
Total_exclusive	SEC8	1726300	506220	698910	NA	NA	NA
Total_exclusive	IMD3	1964500	5233900	1473400	NA	NA	NA
Total_exclusive	CDC36	16239000	12400000	17726000	NA	NA	NA
Total_exclusive	EMP24	6305100	12535000	13808000	NA	NA	NA
Total_exclusive	TIM23	3946000	28573000	22561000	NA	NA	NA
Total_exclusive	MOT2	4967000	2847400	5426400	NA	NA	NA
Total_exclusive	PRE6	16208000	0	6102500	NA	NA	NA
Total_exclusive	APS3	44744000	62648000	43487000	NA	NA	NA
Total_exclusive	RCF2	29520000	49948000	29867000	NA	NA	NA
Total_exclusive	HTZ1	0	72824000	11422000	NA	NA	NA
Total_exclusive	CKA1	4202800	3468600	1924400	NA	NA	NA
Total_exclusive	FPR1	19469000	10809000	18193000	NA	NA	NA
Total_exclusive	ELO2	47712000	70205000	60498000	NA	NA	NA
Total_exclusive	CPS1	722330	2381400	1677100	NA	NA	NA
Total_exclusive	ARP3	9676400	2788400	5518000	NA	NA	NA
Total_exclusive	ASN2	3238900	5526200	5767500	NA	NA	NA
Total_exclusive	SHS1	1746000	0	2529500	NA	NA	NA
Total_exclusive	APE2	1938800	214000	786170	NA	NA	NA
Total_exclusive	MCD4	4019300	4171700	2365000	NA	NA	NA
Total_exclusive	HMT1	4962500	7511400	2412600	NA	NA	NA
Total_exclusive	YHR127W	2520300	2449600	2093500	NA	NA	NA
Total_exclusive	MLC1	2033000	12276000	4407500	NA	NA	NA
Total_exclusive	RRP6	2056800	1498100	945020	NA	NA	NA
Total_exclusive	UTP23	9730100	6608500	8647100	NA	NA	NA
Total_exclusive	RNR2	3393900	6996100	2234300	NA	NA	NA
Total_exclusive	THR4	1517400	3108500	2079900	NA	NA	NA
Total_exclusive	EMC1	597750	2370000	879450	NA	NA	NA
Total_exclusive	DNF1	720490	1529100	370690	NA	NA	NA
Total_exclusive	COX13	24438000	5963100	13338000	NA	NA	NA
Total_exclusive	BOI1	949290	289750	372230	NA	NA	NA
Total_exclusive	EIS1	1278900	333540	317530	NA	NA	NA
Total_exclusive	QCR7	865250	114600	7811600	NA	NA	NA
Total_exclusive	HIS4	3352900	1968400	480590	NA	NA	NA
Total_exclusive	URA3	17674000	25561000	20596000	NA	NA	NA
Total_exclusive	DST1	9398800	6000000	6471000	NA	NA	NA
Total_exclusive	RPB8	19924000	21834000	13664000	NA	NA	NA
Total_exclusive	SRP21	30894000	22320000	34692000	NA	NA	NA
Total_exclusive	TOR1	349200	0	155570	NA	NA	NA
Total_exclusive	ADE6	602470	1145500	653440	NA	NA	NA
Total_exclusive	PMT3	5597300	9350400	4193200	NA	NA	NA
Total_exclusive	ERG28	66992000	125820000	68971000	NA	NA	NA
Total_exclusive	ARD1	18388000	10087000	10703000	NA	NA	NA
Total_exclusive	DRS1	0	3283600	2509500	NA	NA	NA
Total_exclusive	CTP1	4627400	10194000	6501400	NA	NA	NA
Total_exclusive	CRG1	6759900	8560500	4340500	NA	NA	NA
Total_exclusive	MAM33	11806000	7948600	10119000	NA	NA	NA
Total_exclusive	YJL225C	197920	766010	830930	NA	NA	NA
Total_exclusive	GAA1	5743400	9486300	3361800	NA	NA	NA
Total_exclusive	RET2	5434700	1478200	3836100	NA	NA	NA
Total_exclusive	NOP15	47047000	59060000	42890000	NA	NA	NA
Total_exclusive	YPT31	6317100	12742000	4337000	NA	NA	NA
Total_exclusive	MOD5	2358000	6006300	1187100	NA	NA	NA
Total_exclusive	PRO1	4749500	4257800	4556300	NA	NA	NA
Total_exclusive	GCG1	16632000	25077000	15963000	NA	NA	NA
Total_exclusive	COX4	14902000	20141000	4746300	NA	NA	NA
Total_exclusive	FRS1	1703400	627840	1342600	NA	NA	NA
Total_exclusive	MRPL6	6446000	5156100	5540700	NA	NA	NA
Total_exclusive	PTC3	7593600	8209600	6304400	NA	NA	NA
Total_exclusive	MRPL11	1851100	3036000	3523600	NA	NA	NA
Total_exclusive	OTU2	7489100	10031000	6074800	NA	NA	NA
Total_exclusive	RKM2	2501600	5105700	3471300	NA	NA	NA
Total_exclusive	YHR122W	14171000	32006000	14523000	NA	NA	NA
Total_exclusive	SHE4	1178200	368130	834520	NA	NA	NA
Total_exclusive	DNM1	2566600	292550	1278000	NA	NA	NA
Total_exclusive	YMR295C	17499000	35634000	13018000	NA	NA	NA
Total_exclusive	HRT1	72880000	114070000	58338000	NA	NA	NA
Total_exclusive	TCD2	9225300	930930	3344400	NA	NA	NA
Total_exclusive	STV1	955270	1747000	506710	NA	NA	NA
Total_exclusive	LYS12	2031900	7405400	4173600	NA	NA	NA
Total_exclusive	POP1	1081200	1703800	556650	NA	NA	NA
Total_exclusive	YGL140C	631080	1454000	184430	NA	NA	NA
Total_exclusive	TPS1	2333300	659600	2853100	NA	NA	NA
Total_exclusive	TIM50	2865700	1439800	3158700	NA	NA	NA
Total_exclusive	FRE1	4287800	6103100	3501500	NA	NA	NA
Total_exclusive	UTP30	4007100	3146100	3290000	NA	NA	NA
Total_exclusive	TAH11	897190	1912700	956940	NA	NA	NA
Total_exclusive	NPL3	5649600	3129400	5804300	NA	NA	NA
Total_exclusive	MHR1	6810400	0	9852800	NA	NA	NA
Total_exclusive	LAG1	7115900	0	5949900	NA	NA	NA
Total_exclusive	MSH1	340160	314630	220600	NA	NA	NA
Total_exclusive	PRE2	6020000	2584700	4343300	NA	NA	NA
Total_exclusive	SRP40	60623000	55238000	48696000	NA	NA	NA
Total_exclusive	RKM3	2030700	4499500	2947700	NA	NA	NA
Total_exclusive	RPN11	8947900	9003900	7662500	NA	NA	NA
Total_exclusive	SVL3	3423300	0	1091800	NA	NA	NA
Total_exclusive	YDR476C	20073000	26745000	14703000	NA	NA	NA
Total_exclusive	SPC2	14560000	13834000	16307000	NA	NA	NA
Total_exclusive	RQC1	1311200	1740500	696300	NA	NA	NA
Total_exclusive	YLH47	1428400	1228000	8659900	NA	NA	NA
Total_exclusive	GPB1	1162100	661340	836480	NA	NA	NA
Total_exclusive	DPH6	1045200	4954100	1956300	NA	NA	NA
Total_exclusive	BGL2	8528800	16078000	16586000	NA	NA	NA
Total_exclusive	AAT2	7650500	3908400	2776800	NA	NA	NA
Total_exclusive	CHD1	459600	260610	274110	NA	NA	NA
Total_exclusive	DRS2	1653100	737060	323160	NA	NA	NA
Total_exclusive	HSH155	649790	1014800	750090	NA	NA	NA
Total_exclusive	DNF2	1098100	1218500	518380	NA	NA	NA
Total_exclusive	ADH3	897070	1845000	2755200	NA	NA	NA
Total_exclusive	PSK1	229490	529340	363780	NA	NA	NA
Total_exclusive	YDR089W	2256900	2327200	1924000	NA	NA	NA
Total_exclusive	SPE3	8607500	11768000	8115900	NA	NA	NA
Total_exclusive	ORT1	11780000	26477000	21512000	NA	NA	NA
Total_exclusive	RQC2	192950	209470	140810	NA	NA	NA
Total_exclusive	VMA4	502870	10685000	6066900	NA	NA	NA
Total_exclusive	ARG1	2438300	3847600	4006700	NA	NA	NA
Total_exclusive	RFA3	33302000	36513000	35685000	NA	NA	NA
Total_exclusive	URK1	4096300	9464000	3699500	NA	NA	NA
Total_exclusive	PMT6	2719500	3055900	2922800	NA	NA	NA
Total_exclusive	PHO8	9637300	12494000	6631000	NA	NA	NA
Total_exclusive	CST26	1858200	7746600	3942600	NA	NA	NA
Total_exclusive	GCD10	3974100	0	4171600	NA	NA	NA
Total_exclusive	RLF2	4428900	1790800	1492200	NA	NA	NA
Total_exclusive	SUI2	1511100	2291800	3166700	NA	NA	NA
Total_exclusive	PRE8	13193000	6195400	24340000	NA	NA	NA
Total_exclusive	RVS161	5450000	2810400	4558000	NA	NA	NA
Total_exclusive	SPT5	640470	43469	848100	NA	NA	NA
Total_exclusive	PRE3	9161500	7546100	11692000	NA	NA	NA
Total_exclusive	COX15	5033800	3557000	5401600	NA	NA	NA
Total_exclusive	EFM5	5425100	10509000	7629900	NA	NA	NA
Total_exclusive	RPM2	842250	401000	350150	NA	NA	NA
Total_exclusive	RSM10	9343800	1191600	13582000	NA	NA	NA
Total_exclusive	TIM11	23050000	16626000	28226000	NA	NA	NA
Total_exclusive	TYR1	3089500	3414000	3341100	NA	NA	NA
Total_exclusive	GBP2	3380100	11933000	4678900	NA	NA	NA
Total_exclusive	PDC2	1240000	1638700	1036900	NA	NA	NA
Total_exclusive	IPI1	4805900	3154500	2518300	NA	NA	NA
Total_exclusive	VPS74	5939300	4417000	5840500	NA	NA	NA
Total_exclusive	SIT4	2623300	5463000	3075700	NA	NA	NA
Total_exclusive	CHA1	2294500	2091200	1512200	NA	NA	NA
Total_exclusive	VMA8	7240400	13222000	8100200	NA	NA	NA
Total_exclusive	HOC1	4401100	6530500	5244100	NA	NA	NA
Total_exclusive	ERV25	2613700	8499500	5736100	NA	NA	NA
Total_exclusive	MRPL1	784570	5389600	3870300	NA	NA	NA
Total_exclusive	PRI1	3484200	3571300	3779400	NA	NA	NA
Total_exclusive	PTM1	8538600	0	8427100	NA	NA	NA
Total_exclusive	POL12	639260	831150	1613100	NA	NA	NA
Total_exclusive	DBP6	2896900	0	1412500	NA	NA	NA
Total_exclusive	COG6	796610	0	393490	NA	NA	NA
Total_exclusive	RRP14	4699000	0	1593800	NA	NA	NA
Total_exclusive	ISC1	7086100	2734000	4091300	NA	NA	NA
Total_exclusive	SMB1	3933200	4415300	6057500	NA	NA	NA
Total_exclusive	ELO3	21351000	38765000	21874000	NA	NA	NA
Total_exclusive	LIA1	1842500	3787400	1374100	NA	NA	NA
Total_exclusive	ORC5	3083900	2570500	3332900	NA	NA	NA
Total_exclusive	SNO1	17449000	23301000	12857000	NA	NA	NA
Total_exclusive	NNT1	13894000	14726000	12633000	NA	NA	NA
Total_exclusive	DUR1	767850	126260	64452	NA	NA	NA
Total_exclusive	PTR2	4666700	8156500	7431900	NA	NA	NA
Total_exclusive	TYS1	3260000	17898000	1689000	NA	NA	NA
Total_exclusive	HSM3	2442700	1049300	1813400	NA	NA	NA
Total_exclusive	SMC2	281360	3702500	94517	NA	NA	NA
Total_exclusive	SPC3	11212000	44075000	11848000	NA	NA	NA
Total_exclusive	LSP1	6301200	2047600	3256200	NA	NA	NA
Total_exclusive	HSP42	1175400	1676700	918390	NA	NA	NA
Total_exclusive	PHO90	2313700	12204000	1438700	NA	NA	NA
Total_exclusive	VTH1	0	503450	362370	NA	NA	NA
Total_exclusive	KRE6	3165900	3058100	3840800	NA	NA	NA
Total_exclusive	UGP1	1445900	2165400	292000	NA	NA	NA
Total_exclusive	LCP5	3211300	1613800	1544400	NA	NA	NA
Total_exclusive	ERP1	17304000	12144000	12619000	NA	NA	NA
Total_exclusive	PST2	3368500	12633000	15416000	NA	NA	NA
Total_exclusive	APM4	2312800	5503400	1590800	NA	NA	NA
Total_exclusive	SSF1	4386700	2851600	1595900	NA	NA	NA
Total_exclusive	KEX1	1894200	1994600	1935000	NA	NA	NA
Total_exclusive	HPR1	991130	446110	444830	NA	NA	NA
Total_exclusive	ARO2	2785500	6914100	1981500	NA	NA	NA
Total_exclusive	CDC3	1529300	1639600	1725800	NA	NA	NA
Total_exclusive	SOF1	1624200	6143800	1293800	NA	NA	NA
Total_exclusive	GVP36	2715300	2245000	2096100	NA	NA	NA
Total_exclusive	EBS1	2183300	1814800	1856800	NA	NA	NA
Total_exclusive	FMP42	4138000	8566100	2802800	NA	NA	NA
Total_exclusive	ARP7	1371500	2432100	1738000	NA	NA	NA
Total_exclusive	PUB1	35247000	49777000	29707000	NA	NA	NA
Total_exclusive	RPC19	8215200	21974000	22299000	NA	NA	NA
Total_exclusive	CDC1	1274200	3379300	5050500	NA	NA	NA
Total_exclusive	PUP1	9399900	7918100	7389200	NA	NA	NA
Total_exclusive	NPL6	2217100	589760	1970400	NA	NA	NA
Total_exclusive	YPT7	6210200	9841800	7033200	NA	NA	NA
Total_exclusive	APL2	1987700	627720	508110	NA	NA	NA
Total_exclusive	IRR1	655540	1753000	684970	NA	NA	NA
Total_exclusive	RSM27	12290000	17723000	20370000	NA	NA	NA
Total_exclusive	SAM50	1046500	2844900	2629400	NA	NA	NA
Total_exclusive	RRS1	7193300	0	8768600	NA	NA	NA
Total_exclusive	ARP8	996390	743240	569710	NA	NA	NA
Total_exclusive	DSS4	25149000	0	18488000	NA	NA	NA
Total_exclusive	TAF14	404470000	3583200	2749300	NA	NA	NA
Total_exclusive	RPB3	3532800	3999500	4779500	NA	NA	NA
Total_exclusive	CDC12	1024200	512140	1786900	NA	NA	NA
Total_exclusive	SRY1	7828600	20375000	12268000	NA	NA	NA
Total_exclusive	TMA108	1071000	526630	668820	NA	NA	NA
Total_exclusive	TIM54	1711200	1989500	2151600	NA	NA	NA
Total_exclusive	YNR040W	3443200	835200	2762500	NA	NA	NA
Total_exclusive	VBA4	7882500	8967000	1662600	NA	NA	NA
Total_exclusive	NPC2	4908900	11190000	0	NA	NA	NA
Total_exclusive	DCP1	6322700	10848000	6249900	NA	NA	NA
Total_exclusive	VAR1	3912400	520010	2187800	NA	NA	NA
Total_exclusive	YME1	2024800	370940	208440	NA	NA	NA
Total_exclusive	RET3	13849000	18773000	21548000	NA	NA	NA
Total_exclusive	YLR287C	815450	2586600	435260	NA	NA	NA
Total_exclusive	LCB5	834470	1817700	1233900	NA	NA	NA
Total_exclusive	TRM8	3613700	561420	3979600	NA	NA	NA
Total_exclusive	HIS1	0	3242300	828370	NA	NA	NA
Total_exclusive	NDI1	1801700	0	517580	NA	NA	NA
Total_exclusive	UTP11	5974100	4094000	2777500	NA	NA	NA
Total_exclusive	GLR1	823570	769140	896090	NA	NA	NA
Total_exclusive	NST1	1708700	0	869300	NA	NA	NA
Total_exclusive	RSC4	1276100	2043700	642270	NA	NA	NA
Total_exclusive	TAF12	1384600	0	1438300	NA	NA	NA
Total_exclusive	TRM12	2242800	1046300	1449900	NA	NA	NA
Total_exclusive	SKT5	2490100	1308800	1959700	NA	NA	NA
Total_exclusive	MBP1	857890	433050	485480	NA	NA	NA
Total_exclusive	STI1	677120	1085900	558980	NA	NA	NA
Total_exclusive	FUR1	6143400	4164700	2846400	NA	NA	NA
Total_exclusive	ZRC1	14173000	2933200	13456000	NA	NA	NA
Total_exclusive	RPC53	2714500	1965700	1924100	NA	NA	NA
Total_exclusive	PEP3	1038000	562030	538130	NA	NA	NA
Total_exclusive	ANP1	1787300	5589300	833040	NA	NA	NA
Total_exclusive	GAT1	2099700	4555500	1071500	NA	NA	NA
Total_exclusive	MTR4	1820500	269380	242040	NA	NA	NA
Total_exclusive	HHO1	0	2743000	1319600	NA	NA	NA
Total_exclusive	FMP30	1475200	2066000	1679600	NA	NA	NA
Total_exclusive	ESC1	377850	554690	728070	NA	NA	NA
Total_exclusive	YOS9	1409500	1249500	3635700	NA	NA	NA
Total_exclusive	ATP5	0	2858500	3281600	NA	NA	NA
Total_exclusive	GAP1	2675300	2781700	729070	NA	NA	NA
Total_exclusive	MRPL15	5020100	3900100	4526600	NA	NA	NA
Total_exclusive	GLE2	1177400	1660200	780510	NA	NA	NA
Total_exclusive	ARC35	12883000	0	536560	NA	NA	NA
Total_exclusive	SNU13	15636000	24355000	28830000	NA	NA	NA
Total_exclusive	GSP1	7794800	14899000	4170500	NA	NA	NA
Total_exclusive	SAM35	6469900	11651000	2167200	NA	NA	NA
Total_exclusive	TAL1	2477800	0	5418900	NA	NA	NA
Total_exclusive	RPB5	6941200	5832100	3221200	NA	NA	NA
Total_exclusive	RSA4	4309000	0	1993600	NA	NA	NA
Total_exclusive	ERG2	32415000	28062000	33619000	NA	NA	NA
Total_exclusive	RIM1	10022000	1135500	1846500	NA	NA	NA
Total_exclusive	PBP2	1818100	778360	6003500	NA	NA	NA
Total_exclusive	DMA1	2740200	3609100	2665100	NA	NA	NA
Total_exclusive	CCC1	4077800	5063300	4162600	NA	NA	NA
Total_exclusive	CCM1	689710	1060100	357590	NA	NA	NA
Total_exclusive	HUL5	861070	1569500	604890	NA	NA	NA
Total_exclusive	CPR6	4109100	0	9107300	NA	NA	NA
Total_exclusive	APL4	857160	487370	104200	NA	NA	NA
Total_exclusive	BMT6	3624200	7235300	809890	NA	NA	NA
Total_exclusive	NUP53	845110	2579700	2610900	NA	NA	NA
Total_exclusive	UBR1	291220	705760	244750	NA	NA	NA
Total_exclusive	PRP8	200330	575980	93611	NA	NA	NA
Total_exclusive	TAO3	176870	192420	163100	NA	NA	NA
Total_exclusive	GUP1	1814800	653860	1697800	NA	NA	NA
Total_exclusive	GYP5	567340	1582700	214960	NA	NA	NA
Total_exclusive	WTM1	1157500	2314000	1888200	NA	NA	NA
Total_exclusive	CBP3	1513800	0	1210900	NA	NA	NA
Total_exclusive	ORM1	2301600	1742100	3021800	NA	NA	NA
Total_exclusive	LYP1	6101200	4240200	896830	NA	NA	NA
Total_exclusive	HSP26	872330	0	4633900	NA	NA	NA
Total_exclusive	FUS3	3406800	4180300	1954500	NA	NA	NA
Total_exclusive	SEC14	442560	2111900	968300	NA	NA	NA
Total_exclusive	RML2	2975600	0	3712200	NA	NA	NA
Total_exclusive	RSP5	620910	455450	408850	NA	NA	NA
Total_exclusive	ADI1	5478000	10375000	5292000	NA	NA	NA
Total_exclusive	ASM4	1308100	2498800	294160	NA	NA	NA
Total_exclusive	MIC10	13579000	0	28212000	NA	NA	NA
Total_exclusive	BAP2	2680800	698170	1503400	NA	NA	NA
Total_exclusive	CDC9	1098500	1105600	814900	NA	NA	NA
Total_exclusive	RPO41	629920	671090	0	NA	NA	NA
Total_exclusive	MRPL33	11806000	7635100	14199000	NA	NA	NA
Total_exclusive	CHS3	1009800	727260	644770	NA	NA	NA
Total_exclusive	GEM1	1252000	0	332530	NA	NA	NA
Total_exclusive	SEN1	96273	316220	83550	NA	NA	NA
Total_exclusive	TRS31	1465600	2428800	2135400	NA	NA	NA
Total_exclusive	SWI6	930980	713140	1027200	NA	NA	NA
Total_exclusive	NPR1	557170	2309900	1014900	NA	NA	NA
Total_exclusive	ARC19	11979000	6282100	2934900	NA	NA	NA
Total_exclusive	YIL108W	740640	1426400	330440	NA	NA	NA
Total_exclusive	RPA43	7675500	4844200	4150700	NA	NA	NA
Total_exclusive	APT1	5817800	25274000	12458000	NA	NA	NA
Total_exclusive	YGL117W	6642000	13236000	7634100	NA	NA	NA
Total_exclusive	FAR8	1412100	1658400	1137400	NA	NA	NA
Total_exclusive	SPN1	1778300	1122800	1281800	NA	NA	NA
Total_exclusive	TRS33	2519300	4147200	2281200	NA	NA	NA
Total_exclusive	FMP10	3114000	0	2430200	NA	NA	NA
Total_exclusive	WRS1	148790	291460	804470	NA	NA	NA
Total_exclusive	SRV2	429740	314880	1569400	NA	NA	NA
Total_exclusive	PRE7	2048300	0	1285500	NA	NA	NA
Total_exclusive	ARO4	2222300	0	1721300	NA	NA	NA
Total_exclusive	ERG24	2461700	10676000	2194500	NA	NA	NA
Total_exclusive	SQS1	596000	1009200	0	NA	NA	NA
Total_exclusive	ERV41	4037400	9526600	1490300	NA	NA	NA
Total_exclusive	WHI4	1967400	2260300	865420	NA	NA	NA
Total_exclusive	REX4	6481800	0	6742100	NA	NA	NA
Total_exclusive	MRPL23	7283100	6118900	3284600	NA	NA	NA
Total_exclusive	HRR25	705520	874240	732970	NA	NA	NA
Total_exclusive	BEM1	3168200	3115800	3692800	NA	NA	NA
Total_exclusive	CBP2	403980	105720	1287000	NA	NA	NA
Total_exclusive	STE5	605790	559420	526960	NA	NA	NA
Total_exclusive	YBR287W	6685800	0	9318400	NA	NA	NA
Total_exclusive	NSG1	14999000	14649000	18589000	NA	NA	NA
Total_exclusive	RVS167	7984300	997010	1195900	NA	NA	NA
Total_exclusive	BIM1	3929300	3224800	1506700	NA	NA	NA
Total_exclusive	HFD1	1579700	4771400	1753400	NA	NA	NA
Total_exclusive	RSE1	271410	412730	595290	NA	NA	NA
Total_exclusive	NDC1	608960	1624000	2194600	NA	NA	NA
Total_exclusive	FRD1	713650	849510	2230400	NA	NA	NA
Total_exclusive	YEL043W	2209400	975030	478760	NA	NA	NA
Total_exclusive	KTI12	5335700	9130400	7797100	NA	NA	NA
Total_exclusive	CYB5	34475000	38724000	22318000	NA	NA	NA
Total_exclusive	MUP1	6096000	0	3974500	NA	NA	NA
Total_exclusive	TOF1	772680	0	303650	NA	NA	NA
Total_exclusive	RHO3	1056500	5349300	1786000	NA	NA	NA
Total_exclusive	ACK1	10178000	1791900	468170	NA	NA	NA
Total_exclusive	GAS5	2598900	0	3270700	NA	NA	NA
Total_exclusive	SLT2	2297200	1464700	3912800	NA	NA	NA
Total_exclusive	BOI2	353600	132580	201590	NA	NA	NA
Total_exclusive	POP5	1539800	8027100	2960700	NA	NA	NA
Total_exclusive	SHE2	8778600	17557000	12232000	NA	NA	NA
Total_exclusive	SEA4	402040	449950	0	NA	NA	NA
Total_exclusive	CKB2	3054900	6934600	5726200	NA	NA	NA
Total_exclusive	ELP2	764690	308160	685610	NA	NA	NA
Total_exclusive	RSM26	5545500	2251800	4989700	NA	NA	NA
Total_exclusive	SAM3	9032200	0	5448800	NA	NA	NA
Total_exclusive	TAE1	0	4036900	10426000	NA	NA	NA
Total_exclusive	PTC2	4260000	4236600	1851000	NA	NA	NA
Total_exclusive	ORC3	862830	1549300	634120	NA	NA	NA
Total_exclusive	CTR9	292430	178570	243530	NA	NA	NA
Total_exclusive	SFH1	2544400	3379700	14918000	NA	NA	NA
Total_exclusive	BUD21	3216400	0	1878900	NA	NA	NA
Total_exclusive	PSK2	283080	697080	39052	NA	NA	NA
Total_exclusive	ADE5	916880	139050	365090	NA	NA	NA
Total_exclusive	KSS1	2778700	4144200	1324100	NA	NA	NA
Total_exclusive	UBA1	678740	314990	374610	NA	NA	NA
Total_exclusive	VID27	1108100	591320	937580	NA	NA	NA
Total_exclusive	MRPS16	4630300	9808000	7468100	NA	NA	NA
Total_exclusive	SLF1	2044800	2262600	1949100	NA	NA	NA
Total_exclusive	RPN13	29501000	46081000	22913000	NA	NA	NA
Total_exclusive	YPK1	149090	1382800	958520	NA	NA	NA
Total_exclusive	KGD1	328060	806620	903530	NA	NA	NA
Total_exclusive	SRB2	1211300	4459400	3068800	NA	NA	NA
Total_exclusive	RFT1	1197800	3781900	1697500	NA	NA	NA
Total_exclusive	GCD14	1515200	1420700	2712800	NA	NA	NA
Total_exclusive	GPN3	15005000	13350000	22337000	NA	NA	NA
Total_exclusive	ALE1	4977800	642490	1267400	NA	NA	NA
Total_exclusive	SAC6	0	409060	518340	NA	NA	NA
Total_exclusive	PEP5	1002000	775430	549710	NA	NA	NA
Total_exclusive	FCY2	8519400	4185600	4966500	NA	NA	NA
Total_exclusive	SMC1	276920	263320	434140	NA	NA	NA
Total_exclusive	MET12	346390	830220	573450	NA	NA	NA
Total_exclusive	MRH4	421120	232210	421540	NA	NA	NA
Total_exclusive	HDA1	755460	332440	476880	NA	NA	NA
Total_exclusive	ORC4	659020	1616500	968150	NA	NA	NA
Total_exclusive	CIR2	984590	1242800	993450	NA	NA	NA
Total_exclusive	NBP2	3858000	2173000	7266600	NA	NA	NA
Total_exclusive	TPT1	2000300	1170600	1107800	NA	NA	NA
Total_exclusive	BAT2	5160900	10281000	0	NA	NA	NA
Total_exclusive	LSB3	475220	1701700	245210	NA	NA	NA
Total_exclusive	CHS2	782680	621440	89635	NA	NA	NA
Total_exclusive	SWI3	497670	356870	234610	NA	NA	NA
Total_exclusive	TOR2	129190	6614.6	155130	NA	NA	NA
Total_exclusive	CYM1	284810	372150	93391	NA	NA	NA
Total_exclusive	RER2	3179400	6107400	2584600	NA	NA	NA
Total_exclusive	VMA22	0	3407000	1866900	NA	NA	NA
Total_exclusive	STE24	1959300	4282500	905460	NA	NA	NA
Total_exclusive	UPF3	2587200	1759900	954230	NA	NA	NA
Total_exclusive	BAP3	674950	649040	386270	NA	NA	NA
Total_exclusive	PHO87	2097600	0	1291000	NA	NA	NA
Total_exclusive	STE20	0	359500	114040	NA	NA	NA
Total_exclusive	AGC1	464520	838540	516600	NA	NA	NA
Total_exclusive	IRA2	38279	251520	27720	NA	NA	NA
Total_exclusive	YCP4	1951000	2434300	2456900	NA	NA	NA
Total_exclusive	SNU114	259560	504680	215060	NA	NA	NA
Total_exclusive	ERG7	2167300	1765200	1016500	NA	NA	NA
Total_exclusive	MDM38	0	411660	947300	NA	NA	NA
Total_exclusive	CDC53	285600	1356500	303750	NA	NA	NA
Total_exclusive	MPD1	950000	1708600	252890	NA	NA	NA
Total_exclusive	ICE2	1525800	2890000	1085300	NA	NA	NA
Total_exclusive	RHO1	12367000	4397900	8412600	NA	NA	NA
Total_exclusive	PCT1	880050	4835600	1940300	NA	NA	NA
Total_exclusive	ITR1	3510400	4207100	2611400	NA	NA	NA
Total_exclusive	SEC6	568100	971600	225320	NA	NA	NA
Total_exclusive	MRPL38	2693200	0	5608500	NA	NA	NA
Total_exclusive	TEL2	713460	3533500	0	NA	NA	NA
Total_exclusive	MCY1	547340	669240	0	NA	NA	NA
Total_exclusive	LSC1	533380	0	378240	NA	NA	NA
Total_exclusive	YEH1	586470	762080	470450	NA	NA	NA
Total_exclusive	ENV9	12869000	6459400	8893400	NA	NA	NA
Total_exclusive	VAC14	668000	0	521000	NA	NA	NA
Total_exclusive	SEC39	511770	770800	205460	NA	NA	NA
Total_exclusive	HIP1	1380000	8260600	1428000	NA	NA	NA
Total_exclusive	CHS1	939190	259430	551600	NA	NA	NA
Total_exclusive	GYL1	189090	668700	272270	NA	NA	NA
Total_exclusive	CSC1	787850	1463200	563270	NA	NA	NA
Total_exclusive	SSP120	4893100	7142300	6658800	NA	NA	NA
Total_exclusive	NBP35	7425800	6691100	7675700	NA	NA	NA
Total_exclusive	SKI8	2587300	6933000	2141200	NA	NA	NA
Total_exclusive	DIC1	4857000	7842700	5713600	NA	NA	NA
Total_exclusive	SGN1	3602100	3433200	3450900	NA	NA	NA
Total_exclusive	BET3	5395000	12545000	9759400	NA	NA	NA
Total_exclusive	PDR1	673980	274630	54798	NA	NA	NA
Total_exclusive	SPT7	142520	290350	167210	NA	NA	NA
Total_exclusive	TPS3	414180	230550	206680	NA	NA	NA
Total_exclusive	YPL225W	3799800	3602700	4990300	NA	NA	NA
Total_exclusive	TAT1	1452100	1436000	635170	NA	NA	NA
Total_exclusive	SAL1	255560	331510	404660	NA	NA	NA
Total_exclusive	AVT7	5415900	6266700	1841900	NA	NA	NA
Total_exclusive	RGR1	309070	0	349920	NA	NA	NA
Total_exclusive	KCC4	517880	645190	430400	NA	NA	NA
Total_exclusive	IRC20	187850	0	44390	NA	NA	NA
Total_exclusive	COF1	9660400	0	4373000	NA	NA	NA
Total_exclusive	SMD1	0	8459100	1700100	NA	NA	NA
Total_exclusive	RAD3	847580	1007600	275890	NA	NA	NA
Total_exclusive	CWH43	2089700	4700100	0	NA	NA	NA
Total_exclusive	PHO91	1657700	0	1004600	NA	NA	NA
Total_exclusive	PET127	694530	437450	0	NA	NA	NA
Total_exclusive	TOD6	551510	2006400	1149100	NA	NA	NA
Total_exclusive	FUI1	1371600	2170100	746630	NA	NA	NA
Total_exclusive	ALT2	1778200	509040	1736200	NA	NA	NA
Total_exclusive	MET13	714930	1507700	543880	NA	NA	NA
Total_exclusive	MYO5	301050	946570	234890	NA	NA	NA
Total_exclusive	FCF2	0	4363800	2480600	NA	NA	NA
Total_exclusive	HTS1	19006000	238880	508180	NA	NA	NA
Total_exclusive	NUC1	1156200	28535000	1187300	NA	NA	NA
Total_exclusive	DLD1	985380	811520	492690	NA	NA	NA
Total_exclusive	GEF1	544010	790730	784230	NA	NA	NA
Total_exclusive	UGO1	1247200	1266000	734260	NA	NA	NA
Total_exclusive	VPS33	831570	2147500	460630	NA	NA	NA
Total_exclusive	OCH1	492940	1060600	0	NA	NA	NA
Total_exclusive	POM34	2179400	0	4008700	NA	NA	NA
Total_exclusive	LSO2	34510000	0	19953000	NA	NA	NA
Total_exclusive	RSM25	2811800	0	3045000	NA	NA	NA
Total_exclusive	SHO1	2120300	2028300	5481800	NA	NA	NA
Total_exclusive	PEP4	1118600	2108500	4329100	NA	NA	NA
Total_exclusive	YGL039W	2222700	8427200	1548400	NA	NA	NA
Total_exclusive	COQ6	692780	3363100	598270	NA	NA	NA
Total_exclusive	MRPL25	2958800	7125500	3963500	NA	NA	NA
Total_exclusive	NUT1	362790	540830	170100	NA	NA	NA
Total_exclusive	FUN30	116630	0	138560	NA	NA	NA
Total_exclusive	BNI1	0	138090	69218	NA	NA	NA
Total_exclusive	TRS130	1150300	1568000	311410	NA	NA	NA
Total_exclusive	CIA1	1694500	5657600	1268900	NA	NA	NA
Total_exclusive	CYC3	417520	5084000	5459900	NA	NA	NA
Total_exclusive	FET3	2485600	1557600	2274300	NA	NA	NA
Total_exclusive	RTT10	460170	759640	101440	NA	NA	NA
Total_exclusive	LSM12	881310	0	1601500	NA	NA	NA
Total_exclusive	CBP6	1977900	0	1096300	NA	NA	NA
Total_exclusive	ATP17	17576000	0	15617000	NA	NA	NA
Total_exclusive	LEU4	0	720220	66998	NA	NA	NA
Total_exclusive	SUI3	1117300	0	1716800	NA	NA	NA
Total_exclusive	RNQ1	0	4378500	5697100	NA	NA	NA
Total_exclusive	CAF4	612400	1717400	955820	NA	NA	NA
Total_exclusive	QDR3	1055300	273550	311000	NA	NA	NA
Total_exclusive	COQ9	2810000	6159800	1634100	NA	NA	NA
Total_exclusive	SGT2	259460	790690	745430	NA	NA	NA
Total_exclusive	PIC2	2392400	0	424170	NA	NA	NA
Total_exclusive	ALD5	801730	1255200	414710	NA	NA	NA
Total_exclusive	GRX7	611270	6206700	5102600	NA	NA	NA
Total_exclusive	TUP1	773940	1281800	386260	NA	NA	NA
Total_exclusive	CMK2	1568900	10081000	3459000	NA	NA	NA
Total_exclusive	RFA2	1640100	0	3976700	NA	NA	NA
Total_exclusive	LSM2	5154800	9441900	0	NA	NA	NA
Total_exclusive	YGR122W	845960	0	1833700	NA	NA	NA
Total_exclusive	BNA4	1184200	2610400	640000	NA	NA	NA
Total_exclusive	FTR1	2733200	7640400	2837100	NA	NA	NA
Total_exclusive	GPI8	1243700	4755500	0	NA	NA	NA
Total_exclusive	DSL1	255150	533100	405490	NA	NA	NA
Total_exclusive	FCF1	11540000	2753700	3062100	NA	NA	NA
Total_exclusive	ERV29	11410000	15447000	9971500	NA	NA	NA
Total_exclusive	DYN1	159370	37190	0	NA	NA	NA
Total_exclusive	CAP1	1678200	2981000	1722800	NA	NA	NA
Total_exclusive	CDC11	818540	0	281900	NA	NA	NA
Total_exclusive	GDH2	454520	719450	300330	NA	NA	NA
Total_exclusive	EFM2	784150	4011200	2698900	NA	NA	NA
Total_exclusive	MPM1	518390	961190	845480	NA	NA	NA
Total_exclusive	GYP8	2068800	116250	701260	NA	NA	NA
Total_exclusive	KDX1	885340	3974000	384010	NA	NA	NA
Total_exclusive	LAP3	4402300	1359400	2861300	NA	NA	NA
Total_exclusive	BRR2	0	2126400	210180	NA	NA	NA
Total_exclusive	TCA17	0	22284000	5538800	NA	NA	NA
Total_exclusive	YME2	280690	429300	302660	NA	NA	NA
Total_exclusive	OST3	4319600	0	1158600	NA	NA	NA
Total_exclusive	RCF1	5934100	31075000	5744800	NA	NA	NA
Total_exclusive	TOP1	204410	301950	170770	NA	NA	NA
Total_exclusive	PSY2	649470	0	352100	NA	NA	NA
Total_exclusive	LAC1	3629700	0	4227400	NA	NA	NA
Total_exclusive	SNF4	1041600	1284300	0	NA	NA	NA
Total_exclusive	APE1	758850	0	284170	NA	NA	NA
Total_exclusive	MRPL9	1185900	198380	421990	NA	NA	NA
Total_exclusive	ECM33	25377000	22626000	28187000	NA	NA	NA
Total_exclusive	ADO1	968190	2721800	918140	NA	NA	NA
Total_exclusive	UBP15	250670	659650	0	NA	NA	NA
Total_exclusive	SKP1	807260	5183600	1637000	NA	NA	NA
Total_exclusive	ALT1	1461400	1039800	489360	NA	NA	NA
Total_exclusive	BUD7	1160200	1155800	602630	NA	NA	NA
Total_exclusive	UBC6	3091500	3552700	0	NA	NA	NA
Total_exclusive	SMC4	136530	181350	94424	NA	NA	NA
Total_exclusive	MAS1	1225500	0	463850	NA	NA	NA
Total_exclusive	MRPS8	2372200	0	5723500	NA	NA	NA
Total_exclusive	CFD1	696380	1871100	0	NA	NA	NA
Total_exclusive	RSC30	222170	0	102140	NA	NA	NA
Total_exclusive	IRA1	478610	276000	0	NA	NA	NA
Total_exclusive	PET8	1739600	4324100	1827300	NA	NA	NA
Total_exclusive	EMC5	6068000	6320400	2045800	NA	NA	NA
Total_exclusive	ARP5	459820	524020	228000	NA	NA	NA
Total_exclusive	UTP14	312540	268760	451210	NA	NA	NA
Total_exclusive	VID22	775520	0	387440	NA	NA	NA
Total_exclusive	YLR407W	1221100	3886700	0	NA	NA	NA
Total_exclusive	ALR1	407990	567040	784990	NA	NA	NA
Total_exclusive	NFS1	947440	2437600	123410	NA	NA	NA
Total_exclusive	ERP2	6125500	3908900	2479200	NA	NA	NA
Total_exclusive	YGR125W	671410	0	427310	NA	NA	NA
Total_exclusive	YIP1	0	24753000	14818000	NA	NA	NA
Total_exclusive	ORC1	302510	361010	340020	NA	NA	NA
Total_exclusive	CDC123	2111600	3707800	1855500	NA	NA	NA
Total_exclusive	STE4	2803300	0	1276800	NA	NA	NA
Total_exclusive	SRM1	252700	284000	0	NA	NA	NA
Total_exclusive	GLN1	2105000	1537300	1394400	NA	NA	NA
Total_exclusive	MNN5	279550	485880	0	NA	NA	NA
Total_exclusive	AHA1	682040	0	172990	NA	NA	NA
Total_exclusive	ALB1	12364000	0	11032000	NA	NA	NA
Total_exclusive	VOA1	15572000	17200000	0	NA	NA	NA
Total_exclusive	COX9	0	22780000	9810300	NA	NA	NA
Total_exclusive	AIR1	2480500	1212100	1201500	NA	NA	NA
Total_exclusive	MAK3	1858400	1871800	0	NA	NA	NA
Total_exclusive	YPK3	0	2508000	306660	NA	NA	NA
Total_exclusive	PIH1	784530	0	1419600	NA	NA	NA
Total_exclusive	MSC3	804050	1819600	759880	NA	NA	NA
Total_exclusive	ECM32	135450	1539300	0	NA	NA	NA
Total_exclusive	ELP6	4649300	4022200	5426500	NA	NA	NA
Total_exclusive	MRPL51	811020	0	5800000	NA	NA	NA
Total_exclusive	RSC6	1226300	0	888530	NA	NA	NA
Total_exclusive	SWD1	1291600	2030500	141070	NA	NA	NA
Total_exclusive	LEM3	2148200	0	672200	NA	NA	NA
Total_exclusive	CTR1	2278300	10333000	0	NA	NA	NA
Total_exclusive	CUL3	270980	6349700	261240	NA	NA	NA
Total_exclusive	ZPR1	548850	0	617410	NA	NA	NA
Total_exclusive	ALO1	1526100	0	626530	NA	NA	NA
Total_exclusive	AEP2	474350	427680	332910	NA	NA	NA
Total_exclusive	DHH1	134050	0	840580	NA	NA	NA
Total_exclusive	YLR118C	599710	12887000	6284000	NA	NA	NA
Total_exclusive	VMA7	3263300	0	10127000	NA	NA	NA
Total_exclusive	EXO70	514420	0	537790	NA	NA	NA
Total_exclusive	PAP2	0	556050	436970	NA	NA	NA
Total_exclusive	SNF1	0	267060	69077	NA	NA	NA
Total_exclusive	RPC11	2349100	10271000	5033100	NA	NA	NA
Total_exclusive	MRF	0	2472800	2040800	NA	NA	NA
Total_exclusive	MRX1	466150	239750	0	NA	NA	NA
Total_exclusive	SUR7	3630400	0	2584100	NA	NA	NA
Total_exclusive	PPZ1	1079900	0	166540	NA	NA	NA
Total_exclusive	NRP1	2839100	0	4610000	NA	NA	NA
Total_exclusive	ORC2	825190	656690	195250	NA	NA	NA
Total_exclusive	USE1	2780000	732210	2380400	NA	NA	NA
Total_exclusive	UFD2	364760	0	177440	NA	NA	NA
Total_exclusive	YMR099C	2024900	0	914200	NA	NA	NA
Total_exclusive	DNF3	46587	321890	108730	NA	NA	NA
Total_exclusive	TRP4	359600	1223900	0	NA	NA	NA
Total_exclusive	MAM3	513970	0	998350	NA	NA	NA
Total_exclusive	RPD3	538840	756210	708610	NA	NA	NA
Total_exclusive	SWP1	4656000	0	6074700	NA	NA	NA
Total_exclusive	ARO9	706830	0	1049800	NA	NA	NA
Total_exclusive	RAM2	584890	1065800	833340	NA	NA	NA
Total_exclusive	ARG4	0	2239100	370780	NA	NA	NA
Total_exclusive	MPT5	230680	21331000	123500	NA	NA	NA
Total_exclusive	CKB1	1472200	0	444420	NA	NA	NA
Total_exclusive	MTM1	1757000	2193600	2105200	NA	NA	NA
Total_exclusive	SHB17	1740200	0	1386000	NA	NA	NA
Total_exclusive	IFA38	0	2233400	2038400	NA	NA	NA
Total_exclusive	YNL193W	496190	1204900	112700	NA	NA	NA
Total_exclusive	GYP1	3894500	334550	320610	NA	NA	NA
Total_exclusive	YKL033W-A	2174000	1223200	0	NA	NA	NA
Total_exclusive	GET4	2129300	0	131770	NA	NA	NA
Total_exclusive	MMS1	324220	151920	0	NA	NA	NA
Total_exclusive	CUS1	772020	589930	256760	NA	NA	NA
Total_exclusive	TIP20	493470	0	588820	NA	NA	NA
Total_exclusive	RRP7	3555000	526150	2558500	NA	NA	NA
Total_exclusive	HXT4	0	39292	431040	NA	NA	NA
Total_exclusive	TTI1	315540	581960	275960	NA	NA	NA
Total_exclusive	PGA2	8312300	13251000	8280000	NA	NA	NA
Total_exclusive	BER1	736650	4587800	242960	NA	NA	NA
Total_exclusive	MED1	419480	0	354980	NA	NA	NA
Total_exclusive	POP8	0	5196600	1370500	NA	NA	NA
Total_exclusive	INA17	620870	1647800	0	NA	NA	NA
Total_exclusive	RRP42	654090	1204000	732620	NA	NA	NA
Total_exclusive	HSH49	406820	0	1823400	NA	NA	NA
Total_exclusive	AIM36	337950	0	612070	NA	NA	NA
Total_exclusive	TAF3	275790	0	805310	NA	NA	NA
Total_exclusive	RSC58	593480	886800	0	NA	NA	NA
Total_exclusive	KEI1	9068200	0	4498400	NA	NA	NA
Total_exclusive	DYS1	369660	551990	117270	NA	NA	NA
Total_exclusive	FOL2	0	4158400	656340	NA	NA	NA
Total_exclusive	GNT1	175520	444710	0	NA	NA	NA
Total_exclusive	PRP6	353940	190010	317370	NA	NA	NA
Total_exclusive	MKK1	830890	1246900	0	NA	NA	NA
Total_exclusive	QNS1	34186	0	439230	NA	NA	NA
Total_exclusive	PRP39	161470	0	195090	NA	NA	NA
Total_exclusive	RTP1	296580	475990	0	NA	NA	NA
Total_exclusive	SMY1	240750	0	58976	NA	NA	NA
Total_exclusive	PRS4	571450	0	475470	NA	NA	NA
Total_exclusive	TPD3	563430	385380	704620	NA	NA	NA
Total_exclusive	RRM3	373410	0	100360	NA	NA	NA
Total_exclusive	RER1	4515900	4506500	3942600	NA	NA	NA
Total_exclusive	RRP17	2849200	0	602410	NA	NA	NA
Total_exclusive	RPB10	0	29509000	14374000	NA	NA	NA
Total_exclusive	YIF1	1540400	0	1512600	NA	NA	NA
Total_exclusive	RAD51	1299400	1160800	1781500	NA	NA	NA
Total_exclusive	RAD5	0	273200	118210	NA	NA	NA
Total_exclusive	DPB2	349410	0	208800	NA	NA	NA
Total_exclusive	RTT101	286630	133550	544780	NA	NA	NA
Total_exclusive	LEU3	363830	69970	0	NA	NA	NA
Total_exclusive	CDC42	8553200	0	1200000	NA	NA	NA
Total_exclusive	TIM21	1336100	0	815650	NA	NA	NA
Total_exclusive	MDV1	654480	0	149130	NA	NA	NA
Total_exclusive	LMO1	260660	586700	213810	NA	NA	NA
Total_exclusive	GAB1	0	6332900	7136500	NA	NA	NA
Total_exclusive	YPR147C	704560	2461000	1602500	NA	NA	NA
Total_exclusive	YRA2	0	5412400	2045300	NA	NA	NA
Total_exclusive	SAY1	1405900	1119800	1093400	NA	NA	NA
Total_exclusive	VPS64	0	580190	263200	NA	NA	NA
Total_exclusive	MSS4	0	83958	53944	NA	NA	NA
Total_exclusive	BUD3	91446	0	108170	NA	NA	NA
Total_exclusive	ZWF1	262360	567590	181350	NA	NA	NA
Total_exclusive	CSG2	1586900	2050800	1568900	NA	NA	NA
Total_exclusive	SLM4	0	14120000	4663000	NA	NA	NA
Total_exclusive	TGL3	666160	0	479390	NA	NA	NA
Total_exclusive	IRC22	7022500	18291000	0	NA	NA	NA
Total_exclusive	PEX3	1238500	3247600	0	NA	NA	NA
Total_exclusive	OCA1	1892400	0	3762600	NA	NA	NA
Total_exclusive	GDE1	338180	0	258960	NA	NA	NA
Total_exclusive	SYF1	132330	168780	90875	NA	NA	NA
Total_exclusive	SOK1	108370	277910	140130	NA	NA	NA
Total_exclusive	IML1	0	130480	34624	NA	NA	NA
Total_exclusive	MDM20	156900	0	69961	NA	NA	NA
Total_exclusive	PRS2	2540700	1809200	0	NA	NA	NA
Total_exclusive	RHB1	2588300	3464600	2397400	NA	NA	NA
Total_exclusive	SPT20	164170	702460	0	NA	NA	NA
Total_exclusive	MRS3	658800	3805100	1503200	NA	NA	NA
Total_exclusive	ADE4	528260	0	497300	NA	NA	NA
Total_exclusive	HIR3	1015300	285000	313330	NA	NA	NA
Total_exclusive	UFO1	296530	0	981420	NA	NA	NA
Total_exclusive	YDL157C	1810500	0	2208100	NA	NA	NA
Total_exclusive	URA5	925420	0	851290	NA	NA	NA
Total_exclusive	YEA6	641700	0	2111700	NA	NA	NA
Total_exclusive	CTF18	278480	348260	575310	NA	NA	NA
Total_exclusive	YGR054W	383350	0	211990	NA	NA	NA
Total_exclusive	IES3	1230600	0	231420	NA	NA	NA
Total_exclusive	YSC83	0	371430	2353600	NA	NA	NA
Total_exclusive	YBR238C	1046800	707530	0	NA	NA	NA
Total_exclusive	EFM3	1600000	0	1478400	NA	NA	NA
Total_exclusive	HRD3	687250	540380	512230	NA	NA	NA
Total_exclusive	SEC66	1790200	0	1096800	NA	NA	NA
Total_exclusive	ULP1	845360	256520	0	NA	NA	NA
Total_exclusive	AIM25	643240	0	389140	NA	NA	NA
Total_exclusive	KIN4	115670	61364	0	NA	NA	NA
Total_exclusive	SMD2	4855000	268420000	0	NA	NA	NA
Total_exclusive	BRN1	610740	141860	0	NA	NA	NA
Total_exclusive	NNF2	0	222240	282340	NA	NA	NA
Total_exclusive	YSH1	233620	0	427710	NA	NA	NA
Total_exclusive	SPT14	755300	0	399480	NA	NA	NA
Total_exclusive	YPT52	0	519550	1371700	NA	NA	NA
Total_exclusive	SPP1	0	700900	848610	NA	NA	NA
Total_exclusive	PEX1	171810	0	50692	NA	NA	NA
Total_exclusive	IKI1	106460	1806200	0	NA	NA	NA
Total_exclusive	RPN10	3036400	0	3623000	NA	NA	NA
Total_exclusive	MTO1	520090	0	702960	NA	NA	NA
Total_exclusive	HIR1	93035	304880	0	NA	NA	NA
Total_exclusive	BRE1	185960	639510	0	NA	NA	NA
Total_exclusive	DIG1	656240	927690	476140	NA	NA	NA
Total_exclusive	RRP40	1212600	1134300	1102800	NA	NA	NA
Total_exclusive	COG1	440460	0	202840	NA	NA	NA
Total_exclusive	TCM62	0	412890	157620	NA	NA	NA
Total_exclusive	SAP190	805320	382640	925640	NA	NA	NA
Total_exclusive	IES1	66362	0	70123	NA	NA	NA
Total_exclusive	PIF1	0	317930	308120	NA	NA	NA
Total_exclusive	APL1	163460	392180	233510	NA	NA	NA
Total_exclusive	MGR3	215860	1036700	0	NA	NA	NA
Total_exclusive	DID2	1046500	0	1333600	NA	NA	NA
Total_exclusive	RRP43	335980	344270	0	NA	NA	NA
Total_exclusive	GPT2	275010	0	256250	NA	NA	NA
Total_exclusive	SEC16	53897	20226	0	NA	NA	NA
Total_exclusive	BUD22	261820	0	625550	NA	NA	NA
Total_exclusive	SSL1	483580	318190	0	NA	NA	NA
Total_exclusive	ATG19	177500	0	285090	NA	NA	NA
Total_exclusive	MTC2	431000	789570	81628	NA	NA	NA
Total_exclusive	SDH2	996000	0	666520	NA	NA	NA
Total_exclusive	SEC24	267260	0	32376	NA	NA	NA
Total_exclusive	CHK1	198680	237440	134090	NA	NA	NA
Total_exclusive	GCN2	92729	180970	0	NA	NA	NA
Total_exclusive	VAN1	0	793860	168660	NA	NA	NA
Total_exclusive	UBC4	6563500	0	4078900	NA	NA	NA
Total_exclusive	VPS53	26109	168980	92233	NA	NA	NA
Total_exclusive	PSG1	611330	0	300370	NA	NA	NA
Total_exclusive	YJR015W	1719000	3287200	0	NA	NA	NA
Total_exclusive	TAF2	0	103730	60203	NA	NA	NA
Total_exclusive	ARA1	209260	0	842270	NA	NA	NA
Total_exclusive	ARP1	0	1342500	301950	NA	NA	NA
Total_exclusive	RIT1	383930	549030	276240	NA	NA	NA
Total_exclusive	GYP6	1425700	418970	0	NA	NA	NA
Total_exclusive	DOM34	846720	209180	0	NA	NA	NA
Total_exclusive	RAD16	39657	440830	0	NA	NA	NA
Total_exclusive	SKG1	0	156460	466480	NA	NA	NA
Total_exclusive	RAT1	155980	187120	0	NA	NA	NA
Total_exclusive	THO2	74832	0	41439	NA	NA	NA
Total_exclusive	STE12	263730	316140	0	NA	NA	NA
Total_exclusive	CRT10	0	82573	327260	NA	NA	NA
Total_exclusive	EOS1	382790	0	441310	NA	NA	NA
Total_exclusive	SEC1	0	452510	109100	NA	NA	NA
Total_exclusive	PAP1	4992100	0	2388500	NA	NA	NA
Total_exclusive	LHP1	791220	823220	0	NA	NA	NA
Total_exclusive	MPD2	0	33455000	732890	NA	NA	NA
Total_exclusive	POP4	342230	0	318400	NA	NA	NA
Total_exclusive	RBS1	959610	0	822600	NA	NA	NA
Total_exclusive	ELG1	0	619770	120240	NA	NA	NA
Total_exclusive	BRF1	1917200	0	1865700	NA	NA	NA
Total_exclusive	MTG1	61595	0	426310	NA	NA	NA
Total_exclusive	REE1	1042500	222150	1444200	NA	NA	NA
Total_exclusive	NMD4	0	1431500	193830	NA	NA	NA
Total_exclusive	YLR413W	686320	0	736260	NA	NA	NA
Total_exclusive	DET1	0	222350	721420	NA	NA	NA
Total_exclusive	DGA1	0	2548000	61380	NA	NA	NA
Total_exclusive	YNR029C	336020	1779700	0	NA	NA	NA
Total_exclusive	DCK1	0	31668	9931.7	NA	NA	NA
Total_exclusive	YLL032C	63728	117270	0	NA	NA	NA
Total_exclusive	GPI15	961790	0	702260	NA	NA	NA
Total_exclusive	ARC18	1132100	0	3191200	NA	NA	NA
Total_exclusive	KIN28	0	462240	451150	NA	NA	NA
Total_exclusive	CWC22	0	154020	69029	NA	NA	NA
Total_exclusive	MTC5	144340	36321	0	NA	NA	NA
Detected_in_both	RPL3	4063100000	4572800000	3217500000	7220100000	7048600000	6213000000
Detected_in_both	ASC1	8478500000	7175100000	8860000000	13213000000	7012200000	6791700000
Detected_in_both	RPS1B	10632000000	9504800000	8661900000	11192000000	10686000000	9408900000
Detected_in_both	RPL8B	6392900000	6547900000	7268200000	5426100000	6271800000	7526000000
Detected_in_both	RPL4A	11729000000	5162600000	9717400000	18382000000	13569000000	18550000000
Detected_in_both	RPL5	4607900000	9594200000	3805300000	12229000000	10505000000	8134300000
Detected_in_both	RPP0	10396000000	14379000000	11038000000	10650000000	12045000000	10748000000
Detected_in_both	RPS4A	5311300000	6916800000	4137300000	9029900000	8767700000	7013600000
Detected_in_both	TY1B-LR2	415970000	335190000	439050000	98365000	140100000	0
Detected_in_both	RPS3	11749000000	12749000000	10945000000	22270000000	16509000000	17564000000
Detected_in_both	RPL2B	7231400000	11080000000	7448900000	10091000000	10518000000	10745000000
Detected_in_both	RPS8B	10371000000	14263000000	11589000000	14911000000	11357000000	13484000000
Detected_in_both	FAS1	305580000	272510000	198890000	294140000	83411000	102170000
Detected_in_both	TEF1	3544500000	4530900000	3580900000	4269400000	3540000000	3132500000
Detected_in_both	FAS2	252990000	166660000	154820000	1439900000	49489000	26773000
Detected_in_both	PMA1	1705100000	1647800000	1691100000	1493800000	904650000	605930000
Detected_in_both	RPL9A	5351000000	10068000000	5739000000	9828000000	8960900000	9706500000
Detected_in_both	RPL12A	5003400000	7947100000	6854400000	1968600000	7421600000	6795000000
Detected_in_both	RPS18A	9803100000	10252000000	13533000000	5045900000	9068400000	9250700000
Detected_in_both	RPS5	11460000000	12724000000	7234700000	14527000000	15842000000	18252000000
Detected_in_both	RPL1A	5975100000	7181800000	4403200000	4951100000	5081000000	4447300000
Detected_in_both	RPL7A	9447000000	9063900000	7611700000	11511000000	12134000000	13448000000
Detected_in_both	SSA2	1105700000	624740000	1171700000	351290000	168300000	147940000
Detected_in_both	RPL23A	5172300000	2651900000	5452800000	2111100000	2283200000	2151800000
Detected_in_both	CDC19	1576100000	1753300000	1407400000	2447500000	1496000000	1137200000
Detected_in_both	RPS14B	7393800000	4379200000	7992800000	9731700000	8700300000	11504000000
Detected_in_both	RPS22A	4533500000	4070700000	5107500000	3723300000	4015000000	3610000000
Detected_in_both	TDH3	1398700000	1621700000	1442200000	2035400000	1253900000	930430000
Detected_in_both	RPL10	3998600000	3498700000	2531800000	4657200000	5621400000	5818300000
Detected_in_both	URA2	160030000	104200000	102780000	188630000	60153000	25002000
Detected_in_both	PDC1	638930000	719480000	713430000	595210000	411180000	288170000
Detected_in_both	EFT1	344760000	460250000	366800000	148210000	73419000	65582000
Detected_in_both	RPL43B	1326800000	566070000	1307200000	349790000	880450000	866950000
Detected_in_both	NAM7	241130000	292900000	246380000	7420000000	6230000000	7258700000
Detected_in_both	SSB1	1338300000	1230000000	1269000000	702070000	715540000	411770000
Detected_in_both	RPL17A	8737600000	8510900000	9051900000	9986800000	12213000000	10451000000
Detected_in_both	DED1	658450000	653910000	655760000	488690000	235700000	134700000
Detected_in_both	RPS2	4334100000	5676700000	5218300000	3715300000	4139500000	4263100000
Detected_in_both	YHR020W	672050000	592430000	674000000	653650000	606180000	246930000
Detected_in_both	RPS7A	5335700000	5917100000	5157400000	3784600000	4133100000	4265000000
Detected_in_both	GCN1	55790000	67664000	49977000	8593400	3387000	0
Detected_in_both	RPS21B	2101000000	3377200000	2085300000	0	1525300000	996010000
Detected_in_both	RPS24A	6550800000	6375700000	7026900000	6968000000	8018400000	6483800000
Detected_in_both	YEF3	390410000	248620000	242740000	361830000	120120000	64425000
Detected_in_both	RPL18A	4205200000	4840500000	3787800000	8336500000	6964300000	6199400000
Detected_in_both	RPS0A	9264200000	9864400000	9704400000	11532000000	7896000000	12648000000
Detected_in_both	RPS12	7185800000	11177000000	9518100000	1631900000	1282900000	1856100000
Detected_in_both	RPL20B	11322000000	14508000000	12351000000	12852000000	10017000000	11172000000
Detected_in_both	RPL14B	5440100000	5164100000	4439500000	4664000000	4248900000	4744300000
Detected_in_both	ACC1	54636000	48324000	49144000	7643900	2521600	0
Detected_in_both	RPL24A	5271800000	1017500000	4187900000	6560300000	6620300000	7757200000
Detected_in_both	RPL11A	6042500000	5519700000	5173700000	12622000000	12649000000	12629000000
Detected_in_both	SAM1	646890000	639030000	574530000	1110700000	957980000	758050000
Detected_in_both	RPL16B	3881200000	3078900000	4119200000	5891300000	5390200000	6677400000
Detected_in_both	RPS19A	2008100000	4004500000	3750700000	1517500000	2919000000	3873900000
Detected_in_both	ARO1	142170000	84329000	97328000	124210000	39465000	8445200
Detected_in_both	RPS23B	2981200000	3374400000	2955200000	1957500000	3023500000	2439600000
Detected_in_both	RPS9B	5846400000	5990800000	6550600000	5332200000	5198400000	5665200000
Detected_in_both	RPL6A	9301800000	7584400000	8169400000	11750000000	9878600000	10652000000
Detected_in_both	RPL6B	8901400000	7611400000	7652800000	11397000000	8931500000	9755200000
Detected_in_both	RPL25	9737400000	11820000000	10094000000	11258000000	10899000000	10277000000
Detected_in_both	NOP1	603690000	662900000	475340000	300020000	202590000	105550000
Detected_in_both	VMA2	420030000	428840000	345570000	600500000	317870000	103440000
Detected_in_both	RPL22A	2577900000	5208500000	3852400000	1239200000	574990000	0
Detected_in_both	KAP123	287840000	270820000	254410000	340320000	241160000	112130000
Detected_in_both	RPS31	2474800000	889600000	2381400000	2389500000	1461500000	1993500000
Detected_in_both	RPS6B	7468300000	7072800000	9557500000	15611000000	16247000000	16662000000
Detected_in_both	RPS16B	6155400000	4651100000	6214300000	4302400000	5160500000	4768300000
Detected_in_both	RPL15A	7196900000	10377000000	6429300000	11907000000	9915300000	13610000000
Detected_in_both	RPL13B	7157600000	8597100000	5751600000	7728200000	8338900000	9986800000
Detected_in_both	RPS15	1877100000	4283800000	2837200000	1118500000	1816500000	0
Detected_in_both	RPL16A	3071700000	2075300000	2982400000	4656400000	3939100000	5017400000
Detected_in_both	RPS20	6659300000	7112100000	7587700000	8196100000	7300400000	7840200000
Detected_in_both	LEU2	864320000	1323100000	861300000	1115700000	1020200000	470490000
Detected_in_both	RPL28	10259000000	9589600000	10343000000	3607900000	2672700000	4034000000
Detected_in_both	RPL27A	12074000000	13726000000	10964000000	10843000000	12590000000	9458900000
Detected_in_both	RPL21A	5594100000	5637200000	5000300000	2927100000	5014600000	2897700000
Detected_in_both	PFK1	158590000	134950000	101450000	77198000	4620800	0
Detected_in_both	RPL30	4985500000	4528300000	5332300000	2519100000	3648700000	3998900000
Detected_in_both	RPL26B	6290700000	3443200000	5985600000	7231100000	7967500000	5815800000
Detected_in_both	ENO2	340310000	624790000	365450000	210660000	96799000	0
Detected_in_both	RPS17A	16685000000	9354400000	18316000000	7524500000	10057000000	10289000000
Detected_in_both	GFA1	137550000	198340000	155770000	154800000	61737000	10856000
Detected_in_both	RPL19B	9724900000	10200000000	9697400000	10744000000	11992000000	13618000000
Detected_in_both	RPL36B	3601700000	5579600000	4957900000	2779200000	6018500000	5088200000
Detected_in_both	RPS25B	735090000	406950000	3707200000	434020000	650800000	0
Detected_in_both	MES1	131270000	205100000	138190000	84451000	48657000	7343800
Detected_in_both	RPS11B	9240400000	3498100000	8985000000	12958000000	9908000000	8324000000
Detected_in_both	GUS1	133810000	146830000	134480000	65961000	29233000	0
Detected_in_both	RPS13	10405000000	11456000000	9206500000	6390400000	8040900000	9055200000
Detected_in_both	VMA1	124970000	106070000	87669000	111240000	35131000	3197600
Detected_in_both	LEU1	72480000	91049000	85944000	284800000	199780000	128240000
Detected_in_both	ILV2	237420000	180730000	192110000	283530000	131660000	55478000
Detected_in_both	YHB1	538070000	417870000	458170000	441850000	154960000	0
Detected_in_both	HSC82	307700000	216010000	178330000	349790000	30756000	0
Detected_in_both	RPL32	4501400000	6423700000	3929200000	938030000	1806000000	1798500000
Detected_in_both	APA1	724180000	1134500000	755730000	160000000	95041000	0
Detected_in_both	NOP56	379350000	282370000	287000000	91698000	18819000	0
Detected_in_both	NOG1	186010000	238490000	148920000	126490000	26121000	0
Detected_in_both	MAE1	135540000	144350000	134460000	38749000	36312000	0
Detected_in_both	OLA1	320870000	372550000	325660000	249660000	168280000	25075000
Detected_in_both	ATP2	355020000	227930000	241990000	228490000	32599000	68963000
Detected_in_both	MIR1	572120000	523640000	745600000	234060000	288340000	201220000
Detected_in_both	RPL35B	5492700000	2040900000	6220800000	2511000000	4377400000	4247100000
Detected_in_both	ERB1	124560000	130840000	107250000	9214300	8539900	0
Detected_in_both	ATP1	238270000	161850000	191670000	231390000	20187000	79024000
Detected_in_both	RPL38	3533600000	3852400000	5360800000	1436300000	2585300000	3315300000
Detected_in_both	NOP7	165140000	178020000	134120000	26863000	12848000	0
Detected_in_both	RPS28A	6496900000	5761300000	3098400000	900260000	1687200000	2254000000
Detected_in_both	CRM1	75016000	86538000	54864000	20618000	11943000	3355600
Detected_in_both	PET9	323160000	370730000	341010000	179280000	111960000	69235000
Detected_in_both	ACT1	131770000	169450000	143010000	85218000	119680000	202230000
Detected_in_both	MYO2	12520000	14242000	9633100	16159000	0	49843000
Detected_in_both	SRP68	89107000	79791000	79005000	30567000	7725400	0
Detected_in_both	GRS1	63960000	99552000	60307000	8518900	23739000	0
Detected_in_both	RPL33A	6335100000	4668800000	5847500000	4358800000	3167100000	4695100000
Detected_in_both	NOG2	103550000	124200000	78533000	54575000	32996000	0
Detected_in_both	URA7	98931000	65029000	61192000	38207000	12494000	0
Detected_in_both	ADH1	561310000	387400000	476940000	635310000	320330000	323080000
Detected_in_both	FAA4	126040000	205490000	115350000	90887000	61422000	0
Detected_in_both	GPM1	441180000	430040000	498390000	125240000	23869000	0
Detected_in_both	TEF4	349650000	335900000	338980000	242200000	232280000	96784000
Detected_in_both	LAT1	214210000	114270000	183910000	248320000	36503000	69313000
Detected_in_both	PAB1	117620000	93974000	71299000	26397000	12407000	0
Detected_in_both	MRT4	346480000	348380000	257980000	137160000	29123000	0
Detected_in_both	CCT4	93597000	50049000	71684000	58131000	17402000	0
Detected_in_both	RPN1	39114000	34537000	27237000	17285000	1542800	0
Detected_in_both	ENP1	63154000	53371000	80481000	98178000	23905000	0
Detected_in_both	TUB2	238660000	204460000	229050000	193490000	118010000	0
Detected_in_both	SAH1	197660000	120630000	113120000	114780000	8836800	0
Detected_in_both	SUP45	85262000	109660000	92143000	12229000	7101000	0
Detected_in_both	HMG1	44946000	62612000	40470000	7991900	2562900	0
Detected_in_both	RNA1	107010000	118040000	86983000	60009000	33983000	0
Detected_in_both	PSA1	124930000	106180000	103070000	81966000	15220000	0
Detected_in_both	HXT3	29687000	62390000	19303000	33851000	315540000	0
Detected_in_both	TUB1	168050000	168970000	134850000	98828000	70326000	0
Detected_in_both	RPL34B	3951700000	3270100000	4098000000	1799100000	1711400000	0
Detected_in_both	RPS27A	11860000000	6306200000	13322000000	5286700000	5153000000	5357700000
Detected_in_both	RPP2B	568890000	1110200000	877400000	0	207830000	596100000
Detected_in_both	IDH2	88770000	143100000	98015000	22729000	12197000	0
Detected_in_both	YHM2	140390000	217260000	179410000	132420000	146200000	0
Detected_in_both	HHF1	849050000	828230000	706000000	260360000	267130000	417640000
Detected_in_both	OAC1	176650000	236660000	144130000	44509000	60850000	43516000
Detected_in_both	ERG13	45984000	68158000	66081000	26903000	18482000	0
Detected_in_both	RPL39	4982500000	0	4785100000	873940000	4028900000	3304200000
Detected_in_both	FET4	754770	2026100	1206800	80569000	48986000	0

## Sheet: DE572AA-FLAG
Detection	Protein	Total_1	Total_2	Total_3	IP_1	IP_2	IP_3
Total_exclusive	TY1B-LR2	343770000	281810000	453740000	NA	NA	NA
Total_exclusive	SSA2	1244900000	1017100000	1139400000	NA	NA	NA
Total_exclusive	RPL43B	860200000	1330300000	869210000	NA	NA	NA
Total_exclusive	GCN1	54934000	55307000	60428000	NA	NA	NA
Total_exclusive	RPS21B	2201600000	3550900000	3377100000	NA	NA	NA
Total_exclusive	RPS0A	7619000000	11054000000	11872000000	NA	NA	NA
Total_exclusive	ACC1	87446000	35630000	36944000	NA	NA	NA
Total_exclusive	MDN1	14142000	7939600	10056000	NA	NA	NA
Total_exclusive	RPL22A	2845100000	3124600000	3870900000	NA	NA	NA
Total_exclusive	FKS1	80605000	86737000	147390000	NA	NA	NA
Total_exclusive	PFK1	193280000	67846000	80472000	NA	NA	NA
Total_exclusive	RPG1	130040000	55465000	60426000	NA	NA	NA
Total_exclusive	RPL31A	8824600000	8431900000	9405200000	NA	NA	NA
Total_exclusive	UTP20	11518000	9686700	12224000	NA	NA	NA
Total_exclusive	DBP2	238950000	154440000	152910000	NA	NA	NA
Total_exclusive	PDA1	224840000	191660000	229440000	NA	NA	NA
Total_exclusive	YDJ1	382260000	335810000	374640000	NA	NA	NA
Total_exclusive	UTP10	30089000	22978000	30204000	NA	NA	NA
Total_exclusive	TY2B-C	37953000	11797000	56656000	NA	NA	NA
Total_exclusive	GLT1	16198000	11612000	12710000	NA	NA	NA
Total_exclusive	CLU1	54001000	19531000	21647000	NA	NA	NA
Total_exclusive	RRP12	41611000	36738000	46205000	NA	NA	NA
Total_exclusive	CDC39	11777000	11089000	14249000	NA	NA	NA
Total_exclusive	PDR5	31822000	33942000	50572000	NA	NA	NA
Total_exclusive	HSP60	247600000	175000000	222680000	NA	NA	NA
Total_exclusive	NUG1	173670000	163310000	213020000	NA	NA	NA
Total_exclusive	STM1	296880000	686300000	984480000	NA	NA	NA
Total_exclusive	CDC48	108710000	64080000	58777000	NA	NA	NA
Total_exclusive	ERB1	148900000	109550000	109300000	NA	NA	NA
Total_exclusive	SEC7	13404000	10102000	12370000	NA	NA	NA
Total_exclusive	RPL38	3213300000	4459300000	4050600000	NA	NA	NA
Total_exclusive	NOP7	173640000	144560000	117950000	NA	NA	NA
Total_exclusive	CRM1	67354000	58160000	70345000	NA	NA	NA
Total_exclusive	CCT3	53801000	43804000	40071000	NA	NA	NA
Total_exclusive	HYP2	398090000	403260000	576460000	NA	NA	NA
Total_exclusive	COP1	48360000	25683000	26711000	NA	NA	NA
Total_exclusive	NIP1	117090000	50975000	63152000	NA	NA	NA
Total_exclusive	MYO2	9801700	5641200	8411800	NA	NA	NA
Total_exclusive	SRP68	81537000	73297000	66270000	NA	NA	NA
Total_exclusive	PRT1	106360000	36830000	51077000	NA	NA	NA
Total_exclusive	NMD3	215420000	104260000	100740000	NA	NA	NA
Total_exclusive	PFK2	116940000	30559000	36213000	NA	NA	NA
Total_exclusive	GRS1	62538000	28590000	31766000	NA	NA	NA
Total_exclusive	NOG2	82193000	77857000	94492000	NA	NA	NA
Total_exclusive	DBP3	77293000	74528000	105560000	NA	NA	NA
Total_exclusive	TOM70	80595000	54249000	62259000	NA	NA	NA
Total_exclusive	URA7	105540000	52050000	74222000	NA	NA	NA
Total_exclusive	SEC27	59667000	41504000	39806000	NA	NA	NA
Total_exclusive	FAA4	101570000	72426000	92403000	NA	NA	NA
Total_exclusive	PGK1	200840000	168570000	194680000	NA	NA	NA
Total_exclusive	GPM1	400730000	395380000	487890000	NA	NA	NA
Total_exclusive	CBF5	175130000	135310000	141810000	NA	NA	NA
Total_exclusive	POR1	468700000	347460000	2051300000	NA	NA	NA
Total_exclusive	RRP5	7218100	4848800	7113700	NA	NA	NA
Total_exclusive	TY1A-DR2	134810000	72434000	246530000	NA	NA	NA
Total_exclusive	NSR1	176880000	155020000	191100000	NA	NA	NA
Total_exclusive	NOP58	91940000	119760000	175900000	NA	NA	NA
Total_exclusive	RVB1	119630000	114270000	105030000	NA	NA	NA
Total_exclusive	PAB1	92496000	100020000	97067000	NA	NA	NA
Total_exclusive	KAP95	79128000	51230000	86394000	NA	NA	NA
Total_exclusive	VPH1	78582000	44085000	239140000	NA	NA	NA
Total_exclusive	NEW1	18120000	11627000	11632000	NA	NA	NA
Total_exclusive	CHC1	22519000	5325000	5876400	NA	NA	NA
Total_exclusive	RPN2	45623000	27335000	22339000	NA	NA	NA
Total_exclusive	NAN1	42847000	34688000	41433000	NA	NA	NA
Total_exclusive	ECM29	6583300	4270700	7520000	NA	NA	NA
Total_exclusive	MET10	29312000	24109000	23027000	NA	NA	NA
Total_exclusive	KRE33	15951000	7029800	10299000	NA	NA	NA
Total_exclusive	RPN1	49654000	24566000	19164000	NA	NA	NA
Total_exclusive	SRO9	71597000	103330000	157420000	NA	NA	NA
Total_exclusive	SEC26	45326000	20319000	29835000	NA	NA	NA
Total_exclusive	TIF4631	13939000	42619000	27727000	NA	NA	NA
Total_exclusive	FAA1	53908000	52480000	59746000	NA	NA	NA
Total_exclusive	ARX1	59702000	43526000	38818000	NA	NA	NA
Total_exclusive	GCD6	33293000	31209000	44458000	NA	NA	NA
Total_exclusive	MSS116	48828000	22683000	27311000	NA	NA	NA
Total_exclusive	NUP192	11356000	4496600	11213000	NA	NA	NA
Total_exclusive	HAS1	70377000	67602000	44961000	NA	NA	NA
Total_exclusive	YTM1	142510000	80591000	63448000	NA	NA	NA
Total_exclusive	PSE1	18181000	24342000	28699000	NA	NA	NA
Total_exclusive	SEC18	32386000	35694000	33084000	NA	NA	NA
Total_exclusive	SRP72	64163000	45554000	53385000	NA	NA	NA
Total_exclusive	RPA135	28071000	8147500	7174000	NA	NA	NA
Total_exclusive	KAR2	181410000	158010000	210650000	NA	NA	NA
Total_exclusive	SCP160	62593000	53924000	9455600	NA	NA	NA
Total_exclusive	MAK21	23378000	17185000	21102000	NA	NA	NA
Total_exclusive	SAC1	39622000	24213000	28383000	NA	NA	NA
Total_exclusive	SAH1	269050000	88954000	74502000	NA	NA	NA
Total_exclusive	SUP45	63304000	56106000	43173000	NA	NA	NA
Total_exclusive	ILV1	52528000	31180000	24032000	NA	NA	NA
Total_exclusive	RPT5	75836000	39259000	36843000	NA	NA	NA
Total_exclusive	TRM3	11869000	3913300	5149400	NA	NA	NA
Total_exclusive	POL5	17424000	21779000	21344000	NA	NA	NA
Total_exclusive	TCP1	77837000	29618000	40303000	NA	NA	NA
Total_exclusive	FBA1	146840000	87888000	103130000	NA	NA	NA
Total_exclusive	PDB1	514100000	483580000	552850000	NA	NA	NA
Total_exclusive	HMG1	48877000	31129000	46396000	NA	NA	NA
Total_exclusive	RPB2	18155000	15874000	19219000	NA	NA	NA
Total_exclusive	TRM1	33750000	38181000	39175000	NA	NA	NA
Total_exclusive	OLE1	84112000	51521000	129940000	NA	NA	NA
Total_exclusive	RPC40	109040000	109740000	147630000	NA	NA	NA
Total_exclusive	SEC63	59803000	32326000	93536000	NA	NA	NA
Total_exclusive	SXM1	45136000	33391000	48835000	NA	NA	NA
Total_exclusive	MIC60	61820000	33980000	45418000	NA	NA	NA
Total_exclusive	IKI3	11519000	7710100	6807800	NA	NA	NA
Total_exclusive	CPA2	31523000	25321000	14449000	NA	NA	NA
Total_exclusive	RNA1	110800000	110760000	96673000	NA	NA	NA
Total_exclusive	SKI3	6950400	2907500	3953600	NA	NA	NA
Total_exclusive	DOP1	9087000	7868400	8564300	NA	NA	NA
Total_exclusive	URB1	3144400	3705500	5646700	NA	NA	NA
Total_exclusive	NOP4	38200000	26525000	26117000	NA	NA	NA
Total_exclusive	NUP170	7733900	7057500	7954400	NA	NA	NA
Total_exclusive	SEC21	39320000	18416000	20262000	NA	NA	NA
Total_exclusive	CCT7	58794000	30155000	44669000	NA	NA	NA
Total_exclusive	CCT5	71876000	31920000	31938000	NA	NA	NA
Total_exclusive	CCT6	55430000	33134000	33381000	NA	NA	NA
Total_exclusive	RPS26A	2092000000	6619000000	4739100000	NA	NA	NA
Total_exclusive	RPT1	68277000	50696000	40104000	NA	NA	NA
Total_exclusive	ARC1	147250000	111720000	119150000	NA	NA	NA
Total_exclusive	TUB3	79131000	67084000	100020000	NA	NA	NA
Total_exclusive	FUN12	21979000	18488000	27014000	NA	NA	NA
Total_exclusive	UTP22	8569200	5416400	8023700	NA	NA	NA
Total_exclusive	RPT3	107540000	18992000	33020000	NA	NA	NA
Total_exclusive	HXT3	36460000	21611000	31514000	NA	NA	NA
Total_exclusive	NUM1	12240000	4449000	7638400	NA	NA	NA
Total_exclusive	SSC1	53344000	43129000	56208000	NA	NA	NA
Total_exclusive	RBG1	107010000	99491000	102140000	NA	NA	NA
Total_exclusive	VAS1	11817000	5745000	7900400	NA	NA	NA
Total_exclusive	ARB1	56901000	39591000	45284000	NA	NA	NA
Total_exclusive	TIF34	122500000	57456000	58894000	NA	NA	NA
Total_exclusive	LPD1	59007000	41374000	59221000	NA	NA	NA
Total_exclusive	CYS4	28766000	17145000	17754000	NA	NA	NA
Total_exclusive	ILS1	12769000	5196100	9568100	NA	NA	NA
Total_exclusive	LCB1	40594000	28216000	37781000	NA	NA	NA
Total_exclusive	BMS1	6153900	9030300	10943000	NA	NA	NA
Total_exclusive	RPA190	14917000	3900600	3714300	NA	NA	NA
Total_exclusive	ACS2	58757000	133650000	25833000	NA	NA	NA
Total_exclusive	NUP157	9331600	4562700	7289400	NA	NA	NA
Total_exclusive	QCR2	55615000	59783000	495290000	NA	NA	NA
Total_exclusive	MIS1	24416000	12685000	14633000	NA	NA	NA
Total_exclusive	ALD6	29064000	21073000	16844000	NA	NA	NA
Total_exclusive	RPS29B	2313200000	1159000000	2338700000	NA	NA	NA
Total_exclusive	GCD1	28523000	25438000	36851000	NA	NA	NA
Total_exclusive	TOP2	5411400	4886200	7629400	NA	NA	NA
Total_exclusive	RPS29A	2049000000	806920000	2065700000	NA	NA	NA
Total_exclusive	TCB1	8630100	6801400	12621000	NA	NA	NA
Total_exclusive	TCB3	11627000	4781300	8368300	NA	NA	NA
Total_exclusive	THS1	50484000	14942000	16945000	NA	NA	NA
Total_exclusive	EBP2	57265000	38415000	34828000	NA	NA	NA
Total_exclusive	SKI2	11000000	3030700	4483800	NA	NA	NA
Total_exclusive	CCT2	25735000	9693300	14927000	NA	NA	NA
Total_exclusive	RPT4	78345000	14655000	26171000	NA	NA	NA
Total_exclusive	MAK5	20197000	8149600	16731000	NA	NA	NA
Total_exclusive	SDA1	23408000	11226000	22177000	NA	NA	NA
Total_exclusive	RIX7	13666000	10832000	12482000	NA	NA	NA
Total_exclusive	PWP2	11571000	9797800	13496000	NA	NA	NA
Total_exclusive	NOP12	47382000	40155000	39072000	NA	NA	NA
Total_exclusive	NMD5	13434000	12660000	16554000	NA	NA	NA
Total_exclusive	UTP8	34134000	32859000	40543000	NA	NA	NA
Total_exclusive	NOP2	62468000	42094000	45086000	NA	NA	NA
Total_exclusive	SSE1	49690000	18934000	33219000	NA	NA	NA
Total_exclusive	VMA6	101450000	65055000	224170000	NA	NA	NA
Total_exclusive	RPT2	90124000	26832000	36590000	NA	NA	NA
Total_exclusive	CSE1	17948000	10802000	12207000	NA	NA	NA
Total_exclusive	CDC28	55356000	57971000	60662000	NA	NA	NA
Total_exclusive	CHO2	13622000	18881000	19211000	NA	NA	NA
Total_exclusive	SPB1	21940000	9027600	13680000	NA	NA	NA
Total_exclusive	DPS1	56389000	15824000	20159000	NA	NA	NA
Total_exclusive	CIC1	68842000	56721000	67982000	NA	NA	NA
Total_exclusive	RRB1	79362000	50848000	68206000	NA	NA	NA
Total_exclusive	NCL1	23903000	7761900	10668000	NA	NA	NA
Total_exclusive	SPF1	26857000	5115900	17613000	NA	NA	NA
Total_exclusive	ALA1	13480000	4875000	61938000	NA	NA	NA
Total_exclusive	RRP3	34314000	25764000	39986000	NA	NA	NA
Total_exclusive	UTP13	14494000	32118000	18587000	NA	NA	NA
Total_exclusive	PUS1	30859000	32511000	32712000	NA	NA	NA
Total_exclusive	MCM4	12557000	7231400	8042300	NA	NA	NA
Total_exclusive	SAS10	70383000	23267000	30913000	NA	NA	NA
Total_exclusive	RVB2	46917000	36755000	37585000	NA	NA	NA
Total_exclusive	RPL42A	69374000	939750000	107050000	NA	NA	NA
Total_exclusive	YCF1	13690000	6248500	8309900	NA	NA	NA
Total_exclusive	BCP1	80059000	85955000	47115000	NA	NA	NA
Total_exclusive	NOC2	15343000	17510000	19307000	NA	NA	NA
Total_exclusive	TRM5	28043000	28193000	25641000	NA	NA	NA
Total_exclusive	RIX1	9431000	5411300	9906400	NA	NA	NA
Total_exclusive	RKR1	4058600	4354500	5452400	NA	NA	NA
Total_exclusive	HCA4	14873000	8404800	13349000	NA	NA	NA
Total_exclusive	SSZ1	25473000	21551000	24065000	NA	NA	NA
Total_exclusive	SSD1	242370000	150680000	182030000	NA	NA	NA
Total_exclusive	COR1	50080000	35977000	413500000	NA	NA	NA
Total_exclusive	IDH1	128940000	123160000	195690000	NA	NA	NA
Total_exclusive	TIF1	59698000	51097000	48210000	NA	NA	NA
Total_exclusive	GEA2	4232000	5547600	6273400	NA	NA	NA
Total_exclusive	MCM6	8569500	5486000	5474400	NA	NA	NA
Total_exclusive	GGC1	57724000	104710000	103260000	NA	NA	NA
Total_exclusive	PGI1	24182000	35909000	29077000	NA	NA	NA
Total_exclusive	MPP10	21365000	12819000	19392000	NA	NA	NA
Total_exclusive	EGD2	201350000	313990000	407330000	NA	NA	NA
Total_exclusive	NUP133	9231200	7980100	8553500	NA	NA	NA
Total_exclusive	LCB2	46115000	20255000	42770000	NA	NA	NA
Total_exclusive	URB2	3478500	1541200	5168400	NA	NA	NA
Total_exclusive	TMA46	99092000	58592000	58588000	NA	NA	NA
Total_exclusive	MET6	16232000	14881000	8917900	NA	NA	NA
Total_exclusive	ERG11	43739000	18402000	42082000	NA	NA	NA
Total_exclusive	RPP2B	144990000	945230000	1227900000	NA	NA	NA
Total_exclusive	RIA1	4725500	3005100	3111600	NA	NA	NA
Total_exclusive	DED81	51298000	14843000	15136000	NA	NA	NA
Total_exclusive	TCB2	6476500	4930700	4794400	NA	NA	NA
Total_exclusive	UTP15	21146000	9504200	26433000	NA	NA	NA
Total_exclusive	MCM5	12534000	10449000	11654000	NA	NA	NA
Total_exclusive	GDH1	28751000	20515000	23000000	NA	NA	NA
Total_exclusive	ACO2	31522000	21345000	26252000	NA	NA	NA
Total_exclusive	RPT6	102790000	31800000	37066000	NA	NA	NA
Total_exclusive	AAH1	62353000	60641000	47236000	NA	NA	NA
Total_exclusive	ERG27	49576000	52715000	69827000	NA	NA	NA
Total_exclusive	PDX1	24071000	30032000	26512000	NA	NA	NA
Total_exclusive	SEC13	97524000	52650000	66655000	NA	NA	NA
Total_exclusive	LSG1	24695000	8621200	7480100	NA	NA	NA
Total_exclusive	STT4	2779800	1254700	3497900	NA	NA	NA
Total_exclusive	IDH2	114650000	147850000	172800000	NA	NA	NA
Total_exclusive	BEM2	1723200	494430	1073500	NA	NA	NA
Total_exclusive	MSN5	4489900	2616400	5205400	NA	NA	NA
Total_exclusive	PWP1	27443000	19196000	30260000	NA	NA	NA
Total_exclusive	MET18	5086500	4085500	6780100	NA	NA	NA
Total_exclusive	ILV5	115460000	26613000	43355000	NA	NA	NA
Total_exclusive	KAP104	25840000	12666000	20485000	NA	NA	NA
Total_exclusive	NUP188	4238800	836070	2911800	NA	NA	NA
Total_exclusive	TRP3	44525000	29616000	24921000	NA	NA	NA
Total_exclusive	RET1	9788400	5109800	7398100	NA	NA	NA
Total_exclusive	TRM732	2531400	2409300	3426800	NA	NA	NA
Total_exclusive	BRX1	132510000	77417000	69491000	NA	NA	NA
Total_exclusive	CPA1	39923000	47314000	46485000	NA	NA	NA
Total_exclusive	LOS1	7949300	6565300	8955100	NA	NA	NA
Total_exclusive	UTP21	9301800	7809000	10367000	NA	NA	NA
Total_exclusive	DBP9	11661000	5927800	6706400	NA	NA	NA
Total_exclusive	PUF6	23698000	13715000	17769000	NA	NA	NA
Total_exclusive	TRP2	42760000	53541000	37885000	NA	NA	NA
Total_exclusive	ERG13	67074000	41997000	46997000	NA	NA	NA
Total_exclusive	XRN1	4788200	4325600	3503200	NA	NA	NA
Total_exclusive	KRI1	15104000	11379000	20983000	NA	NA	NA
Total_exclusive	KRS1	55384000	13325000	16150000	NA	NA	NA
Total_exclusive	MON2	2780800	1982900	3631600	NA	NA	NA
Total_exclusive	NOP9	12533000	5724200	7828000	NA	NA	NA
Total_exclusive	PAA1	99091000	63943000	70937000	NA	NA	NA
Total_exclusive	ERG1	20843000	16301000	17368000	NA	NA	NA
Total_exclusive	IPI3	12916000	12001000	9459500	NA	NA	NA
Total_exclusive	ERG26	40110000	26594000	33813000	NA	NA	NA
Total_exclusive	RRP8	18996000	15977000	22707000	NA	NA	NA
Total_exclusive	RNR1	16684000	4956500	9404800	NA	NA	NA
Total_exclusive	PRS1	69783000	24185000	27241000	NA	NA	NA
Total_exclusive	RLI1	16512000	13126000	15943000	NA	NA	NA
Total_exclusive	CDC60	7298300	2465100	3345300	NA	NA	NA
Total_exclusive	PGA3	101770000	78261000	83372000	NA	NA	NA
Total_exclusive	RPF1	50922000	35781000	44019000	NA	NA	NA
Total_exclusive	YDR341C	33101000	4197300	5174100	NA	NA	NA
Total_exclusive	RSM23	26491000	9687100	12600000	NA	NA	NA
Total_exclusive	MCM2	6592300	4072400	7052700	NA	NA	NA
Total_exclusive	AAT1	10174000	3759600	10332000	NA	NA	NA
Total_exclusive	UTP4	9644800	3751300	8592000	NA	NA	NA
Total_exclusive	MSS51	27930000	23588000	34683000	NA	NA	NA
Total_exclusive	SNQ2	4852900	2508500	4655800	NA	NA	NA
Total_exclusive	RPN7	56474000	11489000	54362000	NA	NA	NA
Total_exclusive	YNR021W	56668000	46791000	49438000	NA	NA	NA
Total_exclusive	RRP9	13774000	6747600	10132000	NA	NA	NA
Total_exclusive	SHM1	30426000	16981000	17181000	NA	NA	NA
Total_exclusive	GCD2	26322000	29681000	31886000	NA	NA	NA
Total_exclusive	HOM2	54131000	25844000	30438000	NA	NA	NA
Total_exclusive	GCD7	51546000	54093000	57674000	NA	NA	NA
Total_exclusive	RLP7	143500000	124520000	147840000	NA	NA	NA
Total_exclusive	UTP6	8297100	5539200	7209000	NA	NA	NA
Total_exclusive	DIP2	7159800	3728600	5583800	NA	NA	NA
Total_exclusive	NOT3	5004700	6839500	4233800	NA	NA	NA
Total_exclusive	MCM3	4737300	6191900	2782100	NA	NA	NA
Total_exclusive	BMH1	45876000	57777000	32438000	NA	NA	NA
Total_exclusive	ERG5	13472000	9222400	8967000	NA	NA	NA
Total_exclusive	TIF35	67013000	35584000	49019000	NA	NA	NA
Total_exclusive	CEX1	7445700	8747500	8309300	NA	NA	NA
Total_exclusive	NSA1	20646000	11851000	11112000	NA	NA	NA
Total_exclusive	EMW1	4722100	2374400	3694000	NA	NA	NA
Total_exclusive	FPR4	46775000	44971000	73744000	NA	NA	NA
Total_exclusive	ERG9	29422000	24392000	14375000	NA	NA	NA
Total_exclusive	SGD1	5998400	1700900	3761400	NA	NA	NA
Total_exclusive	MRPL3	25335000	14931000	17716000	NA	NA	NA
Total_exclusive	RPP1B	848270000	1612700000	2193100000	NA	NA	NA
Total_exclusive	NOC3	13022000	6471300	10938000	NA	NA	NA
Total_exclusive	CBR1	35831000	16009000	27381000	NA	NA	NA
Total_exclusive	NOP13	18396000	9272900	8005400	NA	NA	NA
Total_exclusive	DPM1	66769000	49932000	64418000	NA	NA	NA
Total_exclusive	NUP120	8305900	2348800	2535000	NA	NA	NA
Total_exclusive	SYO1	19294000	25038000	27813000	NA	NA	NA
Total_exclusive	KAP122	7774600	3076900	6583500	NA	NA	NA
Total_exclusive	IST2	12265000	11970000	17330000	NA	NA	NA
Total_exclusive	HGH1	13647000	15406000	13894000	NA	NA	NA
Total_exclusive	YOL098C	10646000	2915900	4689200	NA	NA	NA
Total_exclusive	PIM1	4975000	2725800	2374600	NA	NA	NA
Total_exclusive	TYW1	8529700	8368600	9721200	NA	NA	NA
Total_exclusive	RRP1	47921000	18541000	40228000	NA	NA	NA
Total_exclusive	RMT2	62023000	21378000	33864000	NA	NA	NA
Total_exclusive	RPL37A	9837700	40886000	122560	NA	NA	NA
Total_exclusive	LYS4	13253000	8669700	7562700	NA	NA	NA
Total_exclusive	GCN3	38724000	27559000	61878000	NA	NA	NA
Total_exclusive	TOM40	33772000	53741000	264510000	NA	NA	NA
Total_exclusive	PMT2	11594000	13198000	18775000	NA	NA	NA
Total_exclusive	ETT1	39757000	44616000	71696000	NA	NA	NA
Total_exclusive	WBP1	36085000	22665000	73239000	NA	NA	NA
Total_exclusive	PIL1	78913000	53485000	60307000	NA	NA	NA
Total_exclusive	YVH1	10439000	29536000	18973000	NA	NA	NA
Total_exclusive	GPP1	84524000	57016000	57184000	NA	NA	NA
Total_exclusive	MCX1	12543000	13217000	13541000	NA	NA	NA
Total_exclusive	GND1	21213000	8607100	7670900	NA	NA	NA
Total_exclusive	NIC96	8700000	2817400	9230000	NA	NA	NA
Total_exclusive	YPP1	6131200	3309900	8141000	NA	NA	NA
Total_exclusive	TUF1	19248000	6661100	8922100	NA	NA	NA
Total_exclusive	UTP9	10583000	9342900	10481000	NA	NA	NA
Total_exclusive	MSH2	6342400	3143500	3562100	NA	NA	NA
Total_exclusive	BFR1	6979400	4783600	11395000	NA	NA	NA
Total_exclusive	MRN1	13602000	4808200	13069000	NA	NA	NA
Total_exclusive	PHO88	41804000	30662000	125800000	NA	NA	NA
Total_exclusive	FPR3	121430000	102270000	175720000	NA	NA	NA
Total_exclusive	SFB2	6476000	2437100	3782200	NA	NA	NA
Total_exclusive	ELP3	10891000	8837200	12620000	NA	NA	NA
Total_exclusive	RPO31	5603000	1729700	2096500	NA	NA	NA
Total_exclusive	GNP1	23486000	13652000	16648000	NA	NA	NA
Total_exclusive	TKL1	14187000	7220800	10003000	NA	NA	NA
Total_exclusive	SHM2	22117000	18815000	15190000	NA	NA	NA
Total_exclusive	UTP7	7237000	5951000	5295300	NA	NA	NA
Total_exclusive	SEC53	31779000	23231000	22068000	NA	NA	NA
Total_exclusive	DLD3	47633000	14020000	19313000	NA	NA	NA
Total_exclusive	YRA1	43738000	56115000	77729000	NA	NA	NA
Total_exclusive	GAR1	114370000	106780000	159420000	NA	NA	NA
Total_exclusive	PPM2	6264100	4285000	6761400	NA	NA	NA
Total_exclusive	NAB6	3603600	5773200	9527200	NA	NA	NA
Total_exclusive	GSF2	37268000	34347000	33847000	NA	NA	NA
Total_exclusive	SCL1	24968000	14415000	29109000	NA	NA	NA
Total_exclusive	SEC23	6485800	6674300	7080200	NA	NA	NA
Total_exclusive	VTC4	13515000	6775000	31718000	NA	NA	NA
Total_exclusive	ALG9	14367000	20251000	14220000	NA	NA	NA
Total_exclusive	MCM7	5059100	4373100	5106000	NA	NA	NA
Total_exclusive	REI1	21398000	10747000	6360100	NA	NA	NA
Total_exclusive	SES1	17586000	9934000	9840700	NA	NA	NA
Total_exclusive	PHB1	32274000	34339000	175700000	NA	NA	NA
Total_exclusive	YML6	40272000	23603000	25806000	NA	NA	NA
Total_exclusive	GUA1	16043000	7105500	10436000	NA	NA	NA
Total_exclusive	ADE3	14777000	3548200	4087000	NA	NA	NA
Total_exclusive	GCD11	19924000	10101000	19362000	NA	NA	NA
Total_exclusive	AFG2	10354000	830020	1649100	NA	NA	NA
Total_exclusive	UBA4	22997000	12588000	18360000	NA	NA	NA
Total_exclusive	YTA12	5202500	1960700	8257600	NA	NA	NA
Total_exclusive	HXK2	12620000	2998400	14198000	NA	NA	NA
Total_exclusive	SCH9	10314000	7029000	8948500	NA	NA	NA
Total_exclusive	YKR018C	15214000	7809600	7045600	NA	NA	NA
Total_exclusive	TRA1	457970	237480	667670	NA	NA	NA
Total_exclusive	NCP1	4138400	3934100	7376500	NA	NA	NA
Total_exclusive	PNO1	30971000	33599000	33380000	NA	NA	NA
Total_exclusive	YMC1	16587000	29279000	27994000	NA	NA	NA
Total_exclusive	RPN3	29764000	4750200	7005500	NA	NA	NA
Total_exclusive	GCN20	4688100	6002300	3254600	NA	NA	NA
Total_exclusive	NUP85	7693100	2779700	6469300	NA	NA	NA
Total_exclusive	NOC4	11049000	5271300	2804300	NA	NA	NA
Total_exclusive	RPP1A	50387000	22046000	1915300	NA	NA	NA
Total_exclusive	NAT1	11314000	1647000	1938700	NA	NA	NA
Total_exclusive	SPT16	1495200	1317900	1724500	NA	NA	NA
Total_exclusive	PYC2	9507700	3532900	4645500	NA	NA	NA
Total_exclusive	TMA19	114750000	261790000	304770000	NA	NA	NA
Total_exclusive	DIM1	19349000	18302000	16202000	NA	NA	NA
Total_exclusive	MRH1	69523000	104140000	117450000	NA	NA	NA
Total_exclusive	SEC28	22423000	38915000	44753000	NA	NA	NA
Total_exclusive	NAM9	11076000	9347100	8385800	NA	NA	NA
Total_exclusive	MOT1	881200	656470	1045100	NA	NA	NA
Total_exclusive	MDJ1	12015000	6744500	9962600	NA	NA	NA
Total_exclusive	NDE1	6998500	5389500	8284800	NA	NA	NA
Total_exclusive	PMT4	11003000	8405700	45711000	NA	NA	NA
Total_exclusive	ARO8	33920000	3680500	4822900	NA	NA	NA
Total_exclusive	MTR10	3985300	3888200	4341600	NA	NA	NA
Total_exclusive	VAC8	8037100	10411000	16539000	NA	NA	NA
Total_exclusive	TPI1	73131000	42066000	56180000	NA	NA	NA
Total_exclusive	GLY1	18889000	23416000	19808000	NA	NA	NA
Total_exclusive	DCP2	2569400	1723600	2522400	NA	NA	NA
Total_exclusive	RCM1	4286300	2029100	4298700	NA	NA	NA
Total_exclusive	UBP3	8122100	3832000	4266800	NA	NA	NA
Total_exclusive	MBF1	47549000	91032000	79343000	NA	NA	NA
Total_exclusive	IMP4	27624000	16959000	27394000	NA	NA	NA
Total_exclusive	DBP10	8868300	1742800	1544900	NA	NA	NA
Total_exclusive	NUP145	3169400	2394100	3128500	NA	NA	NA
Total_exclusive	OST1	36399000	13780000	32612000	NA	NA	NA
Total_exclusive	RSC8	6212500	6443100	12526000	NA	NA	NA
Total_exclusive	GAS1	13128000	11556000	30871000	NA	NA	NA
Total_exclusive	MKT1	3505600	1352000	2916800	NA	NA	NA
Total_exclusive	SPB4	7598100	4779100	1084800	NA	NA	NA
Total_exclusive	CCR4	9353300	3580800	11070000	NA	NA	NA
Total_exclusive	KAP120	5468600	5785500	5778900	NA	NA	NA
Total_exclusive	CKA2	20190000	10967000	12804000	NA	NA	NA
Total_exclusive	TIF5	22656000	6204500	13329000	NA	NA	NA
Total_exclusive	MET17	23942000	15957000	14363000	NA	NA	NA
Total_exclusive	SRP101	9544500	6975100	9016000	NA	NA	NA
Total_exclusive	PRS3	36543000	13050000	6878300	NA	NA	NA
Total_exclusive	BFR2	6472500	2847800	6403700	NA	NA	NA
Total_exclusive	MAK16	37073000	21808000	24975000	NA	NA	NA
Total_exclusive	VPS1	6907100	1356600	2626100	NA	NA	NA
Total_exclusive	VTC2	3081700	1061500	67980000	NA	NA	NA
Total_exclusive	DPL1	6444700	6930300	2977100	NA	NA	NA
Total_exclusive	EMG1	16632000	5963300	12512000	NA	NA	NA
Total_exclusive	PMR1	7117700	3030800	7999300	NA	NA	NA
Total_exclusive	KTR3	16469000	6208200	17295000	NA	NA	NA
Total_exclusive	PRE5	44739000	64632000	52455000	NA	NA	NA
Total_exclusive	EGD1	98011000	44869000	70296000	NA	NA	NA
Total_exclusive	NSA2	42773000	48797000	31281000	NA	NA	NA
Total_exclusive	SEH1	20925000	16213000	18873000	NA	NA	NA
Total_exclusive	LYS21	17421000	8380300	9584700	NA	NA	NA
Total_exclusive	MGM101	18282000	15210000	14728000	NA	NA	NA
Total_exclusive	ATP3	25735000	19161000	27917000	NA	NA	NA
Total_exclusive	PHB2	27655000	15574000	83817000	NA	NA	NA
Total_exclusive	MRPL35	24437000	14831000	17565000	NA	NA	NA
Total_exclusive	SLC1	19081000	24151000	36340000	NA	NA	NA
Total_exclusive	POM152	260990	469310	7412700	NA	NA	NA
Total_exclusive	ROK1	8564200	1543900	1571300	NA	NA	NA
Total_exclusive	CTR86	5886600	4935600	5426000	NA	NA	NA
Total_exclusive	PDI1	9148700	15254000	8607900	NA	NA	NA
Total_exclusive	RPN8	30583000	8075900	8679000	NA	NA	NA
Total_exclusive	DEF1	6201900	17126000	22178000	NA	NA	NA
Total_exclusive	DBP8	14041000	8581500	7544400	NA	NA	NA
Total_exclusive	MNN11	11295000	5243700	44026000	NA	NA	NA
Total_exclusive	NOP16	34054000	32986000	50504000	NA	NA	NA
Total_exclusive	MRPS35	20905000	14619000	16031000	NA	NA	NA
Total_exclusive	SPT15	24815000	25246000	28079000	NA	NA	NA
Total_exclusive	MRP4	14289000	12228000	10701000	NA	NA	NA
Total_exclusive	SSM4	2831600	3256600	3608700	NA	NA	NA
Total_exclusive	NIP7	55671000	28044000	22586000	NA	NA	NA
Total_exclusive	RIP1	59636000	53872000	283370000	NA	NA	NA
Total_exclusive	MRPL24	22929000	13227000	13102000	NA	NA	NA
Total_exclusive	SSH1	46800000	35944000	59126000	NA	NA	NA
Total_exclusive	HTB2	22142000	106450000	164250000	NA	NA	NA
Total_exclusive	RPN5	18021000	7973900	2697400	NA	NA	NA
Total_exclusive	UTP18	20928000	13291000	21843000	NA	NA	NA
Total_exclusive	MET5	4030900	2621300	2513200	NA	NA	NA
Total_exclusive	BRE5	5955700	4597200	5190500	NA	NA	NA
Total_exclusive	RPN9	19459000	8621300	5449100	NA	NA	NA
Total_exclusive	CDC33	41623000	42839000	43357000	NA	NA	NA
Total_exclusive	RFC1	2431400	1162000	2175900	NA	NA	NA
Total_exclusive	GPI16	11150000	2968300	17446000	NA	NA	NA
Total_exclusive	PRE9	20537000	25495000	36383000	NA	NA	NA
Total_exclusive	TSC13	18518000	25610000	29672000	NA	NA	NA
Total_exclusive	ALG2	17498000	8090600	8076400	NA	NA	NA
Total_exclusive	RCL1	12262000	7084500	16405000	NA	NA	NA
Total_exclusive	RPP2A	68397000	297470000	235120000	NA	NA	NA
Total_exclusive	CAM1	59002000	45218000	49066000	NA	NA	NA
Total_exclusive	RPC82	8463200	5269300	7369200	NA	NA	NA
Total_exclusive	RFC5	7656100	4507400	9602600	NA	NA	NA
Total_exclusive	RFC3	3731300	6581300	6528000	NA	NA	NA
Total_exclusive	VMA13	2050600	6282800	9197300	NA	NA	NA
Total_exclusive	NOP14	2526000	2660000	3258300	NA	NA	NA
Total_exclusive	STT3	10322000	5785900	18378000	NA	NA	NA
Total_exclusive	PUF3	10215000	2035700	4722900	NA	NA	NA
Total_exclusive	RPS30B	462820000	298910000	529710000	NA	NA	NA
Total_exclusive	SIS1	17649000	19331000	20077000	NA	NA	NA
Total_exclusive	PUP2	29969000	24332000	34455000	NA	NA	NA
Total_exclusive	OSH3	1111000	670460	2441100	NA	NA	NA
Total_exclusive	TAF6	3440700	2707600	5389400	NA	NA	NA
Total_exclusive	UFD4	2078000	1031100	976100	NA	NA	NA
Total_exclusive	BEM4	2264900	3054900	3722800	NA	NA	NA
Total_exclusive	ODC2	38815000	27332000	41888000	NA	NA	NA
Total_exclusive	PBY1	3355900	3764800	3881600	NA	NA	NA
Total_exclusive	LAA1	1043900	683730	546190	NA	NA	NA
Total_exclusive	POL1	1657500	1219700	984090	NA	NA	NA
Total_exclusive	MYO4	2580400	1100500	1755100	NA	NA	NA
Total_exclusive	PUF4	10150000	4076500	7287600	NA	NA	NA
Total_exclusive	EFB1	33975000	59892000	68883000	NA	NA	NA
Total_exclusive	SCS2	49539000	55961000	71577000	NA	NA	NA
Total_exclusive	HEM1	8627900	3128400	2716500	NA	NA	NA
Total_exclusive	KRR1	8850000	3888100	5670800	NA	NA	NA
Total_exclusive	AAP1	11863000	904150	641960	NA	NA	NA
Total_exclusive	EDC3	8408600	5579100	9828000	NA	NA	NA
Total_exclusive	SMC3	669520	1143700	1253100	NA	NA	NA
Total_exclusive	YMC2	11979000	5397800	7273200	NA	NA	NA
Total_exclusive	PDR12	1068500	1179900	353710	NA	NA	NA
Total_exclusive	SDH1	12178000	5142900	8552600	NA	NA	NA
Total_exclusive	TSA1	37791000	37161000	43417000	NA	NA	NA
Total_exclusive	THR1	35984000	25398000	12520000	NA	NA	NA
Total_exclusive	SRP54	13093000	9721400	9489800	NA	NA	NA
Total_exclusive	SEC10	1571600	956920	1055500	NA	NA	NA
Total_exclusive	COX2	80846000	49930000	220580000	NA	NA	NA
Total_exclusive	MRP7	23005000	12271000	9616900	NA	NA	NA
Total_exclusive	SLY1	4572600	2997500	5094300	NA	NA	NA
Total_exclusive	OXP1	1891300	335590	1601500	NA	NA	NA
Total_exclusive	LOC1	80958000	67908000	61908000	NA	NA	NA
Total_exclusive	RTN1	21415000	17566000	13041000	NA	NA	NA
Total_exclusive	COG4	1830700	1238100	1341100	NA	NA	NA
Total_exclusive	HMG2	7365900	8099100	9832900	NA	NA	NA
Total_exclusive	LIP5	6801500	4511900	12646000	NA	NA	NA
Total_exclusive	TPA1	5926800	1925200	2363100	NA	NA	NA
Total_exclusive	ARG5	4339700	2552300	1235500	NA	NA	NA
Total_exclusive	YPL245W	1908800	3991800	2626700	NA	NA	NA
Total_exclusive	GLC7	9424900	9667800	15694000	NA	NA	NA
Total_exclusive	CYT1	25185000	33827000	264680000	NA	NA	NA
Total_exclusive	TSR1	7581900	2700000	2275300	NA	NA	NA
Total_exclusive	MRPL40	30106000	16069000	16722000	NA	NA	NA
Total_exclusive	PRP43	2891500	767500	1921500	NA	NA	NA
Total_exclusive	HMO1	35016000	184050000	296310000	NA	NA	NA
Total_exclusive	PDS5	1280700	377900	1524300	NA	NA	NA
Total_exclusive	RSM24	14337000	7984300	13725000	NA	NA	NA
Total_exclusive	REP1	21308000	8098000	12681000	NA	NA	NA
Total_exclusive	PMT1	7913800	4626500	12579000	NA	NA	NA
Total_exclusive	LYS9	11360000	5695400	4641900	NA	NA	NA
Total_exclusive	RKM4	7615500	5205100	5689200	NA	NA	NA
Total_exclusive	SUP35	4628600	1561200	1490400	NA	NA	NA
Total_exclusive	ERG6	5041600	2847800	6363200	NA	NA	NA
Total_exclusive	RFC2	4078100	6437500	7394200	NA	NA	NA
Total_exclusive	RSC3	3227400	722280	1660100	NA	NA	NA
Total_exclusive	GET3	11407000	4362300	7810000	NA	NA	NA
Total_exclusive	NUP82	2458000	8120500	4805700	NA	NA	NA
Total_exclusive	MRD1	2238300	1126200	1479100	NA	NA	NA
Total_exclusive	ERG4	22742000	12592000	24675000	NA	NA	NA
Total_exclusive	ARF1	25413000	21674000	11144000	NA	NA	NA
Total_exclusive	COQ1	5749200	8747700	5712100	NA	NA	NA
Total_exclusive	MRPS28	15688000	4030200	4395200	NA	NA	NA
Total_exclusive	ILV6	24917000	20254000	46103000	NA	NA	NA
Total_exclusive	IMP3	13651000	27270000	25071000	NA	NA	NA
Total_exclusive	NOP8	1291000	1968900	3290400	NA	NA	NA
Total_exclusive	POL3	1422500	1272100	2115100	NA	NA	NA
Total_exclusive	TOM71	4628600	3193500	4687700	NA	NA	NA
Total_exclusive	MNN1	1721800	692520	3487700	NA	NA	NA
Total_exclusive	TRS120	1031000	707590	832470	NA	NA	NA
Total_exclusive	SEC61	43064000	18400000	18931000	NA	NA	NA
Total_exclusive	TOM1	1179200	289320	416830	NA	NA	NA
Total_exclusive	NSP1	1206000	1172000	9877600	NA	NA	NA
Total_exclusive	PRO3	35623000	28326000	16138000	NA	NA	NA
Total_exclusive	CLA4	2807700	3306500	2690700	NA	NA	NA
Total_exclusive	SCJ1	7405500	9493000	16709000	NA	NA	NA
Total_exclusive	MRPL7	20637000	22285000	11578000	NA	NA	NA
Total_exclusive	NEO1	2866700	173970	192310	NA	NA	NA
Total_exclusive	APL5	3945600	182920	1709900	NA	NA	NA
Total_exclusive	URE2	7133800	10358000	8151000	NA	NA	NA
Total_exclusive	UTP5	7339000	4413200	7674100	NA	NA	NA
Total_exclusive	NOP6	32967000	19957000	18082000	NA	NA	NA
Total_exclusive	TRP5	4446100	2133600	1569800	NA	NA	NA
Total_exclusive	NAP1	10565000	12093000	7910000	NA	NA	NA
Total_exclusive	ERJ5	18880000	21162000	25063000	NA	NA	NA
Total_exclusive	PHO86	24033000	13752000	27086000	NA	NA	NA
Total_exclusive	MRPS17	23233000	12343000	20478000	NA	NA	NA
Total_exclusive	ACO1	8421500	3565100	4800900	NA	NA	NA
Total_exclusive	YGR210C	8278900	5087000	5646700	NA	NA	NA
Total_exclusive	IML2	4183700	4793200	4052400	NA	NA	NA
Total_exclusive	MRP51	10732000	8775400	9042000	NA	NA	NA
Total_exclusive	RIO1	857880	5640800	4520300	NA	NA	NA
Total_exclusive	PPH22	10615000	1544300	6883100	NA	NA	NA
Total_exclusive	CDC10	2846200	7147200	7976300	NA	NA	NA
Total_exclusive	CYS3	11571000	10998000	16470000	NA	NA	NA
Total_exclusive	NHP2	92616000	42655000	83181000	NA	NA	NA
Total_exclusive	SRP14	22816000	21547000	24552000	NA	NA	NA
Total_exclusive	RMD9	3740200	3113800	3000500	NA	NA	NA
Total_exclusive	GPD2	9405600	9700600	4845000	NA	NA	NA
Total_exclusive	ENP2	5094600	2053100	2946900	NA	NA	NA
Total_exclusive	ERG25	89454000	39362000	84636000	NA	NA	NA
Total_exclusive	SMY2	1235500	1967700	3042500	NA	NA	NA
Total_exclusive	MEU1	14272000	14780000	18632000	NA	NA	NA
Total_exclusive	PRE10	11808000	11354000	23474000	NA	NA	NA
Total_exclusive	BPT1	1178900	1038000	2306700	NA	NA	NA
Total_exclusive	SEC4	9840500	13839000	29388000	NA	NA	NA
Total_exclusive	KTR1	4943100	2640300	27128000	NA	NA	NA
Total_exclusive	MRPL4	17614000	11282000	12852000	NA	NA	NA
Total_exclusive	TAF5	2335300	1929200	2698800	NA	NA	NA
Total_exclusive	REH1	25284000	12798000	9041600	NA	NA	NA
Total_exclusive	RPN6	457570000	11478000	7814300	NA	NA	NA
Total_exclusive	IMG1	23003000	12233000	22344000	NA	NA	NA
Total_exclusive	SOD2	33749000	42319000	90500000	NA	NA	NA
Total_exclusive	ILV3	10024000	2667300	8537400	NA	NA	NA
Total_exclusive	ERV46	10469000	8731000	8286100	NA	NA	NA
Total_exclusive	POL30	11243000	7152100	9936700	NA	NA	NA
Total_exclusive	MRPL17	13139000	132520000	7301000	NA	NA	NA
Total_exclusive	FAP7	3411200	17833000	25168000	NA	NA	NA
Total_exclusive	EMP70	3202000	3349900	2433500	NA	NA	NA
Total_exclusive	EXO84	2638900	838490	1446700	NA	NA	NA
Total_exclusive	YLR419W	677740	333520	413330	NA	NA	NA
Total_exclusive	SQT1	26167000	25637000	33621000	NA	NA	NA
Total_exclusive	MRPS9	20798000	17354000	22645000	NA	NA	NA
Total_exclusive	RTS1	4650600	5346900	4656600	NA	NA	NA
Total_exclusive	NPA3	13027000	12581000	16852000	NA	NA	NA
Total_exclusive	JJJ1	5104400	2196900	2918400	NA	NA	NA
Total_exclusive	MSH6	809750	932590	984450	NA	NA	NA
Total_exclusive	SEC65	11020000	11433000	18548000	NA	NA	NA
Total_exclusive	RIM2	9959200	8797600	16991000	NA	NA	NA
Total_exclusive	PET123	17832000	9520300	14737000	NA	NA	NA
Total_exclusive	PET10	3495300	19236000	21704000	NA	NA	NA
Total_exclusive	CDS1	264510000	500260000	266830000	NA	NA	NA
Total_exclusive	PBP1	4638600	1125200	3484700	NA	NA	NA
Total_exclusive	MRPL13	11197000	11744000	16636000	NA	NA	NA
Total_exclusive	SCS7	24251000	9862900	22404000	NA	NA	NA
Total_exclusive	FSF1	3389300	10076000	7736600	NA	NA	NA
Total_exclusive	GIN4	926430	599480	1103500	NA	NA	NA
Total_exclusive	RPL29	0	1667700000	967790000	NA	NA	NA
Total_exclusive	CAF40	10243000	4133900	12460000	NA	NA	NA
Total_exclusive	EFR3	4011300	1444200	1050000	NA	NA	NA
Total_exclusive	GPI17	5886300	2907800	20714000	NA	NA	NA
Total_exclusive	GPN2	7786300	7532000	12874000	NA	NA	NA
Total_exclusive	MRP1	17448000	14625000	10478000	NA	NA	NA
Total_exclusive	VMA5	5675100	9028800	8401200	NA	NA	NA
Total_exclusive	RPF2	22727000	12129000	14345000	NA	NA	NA
Total_exclusive	APM3	6949700	2480000	1565600	NA	NA	NA
Total_exclusive	RIO2	11354000	5050200	7747700	NA	NA	NA
Total_exclusive	PRS5	9935900	3494200	3550200	NA	NA	NA
Total_exclusive	SEC3	1243900	55507	519220	NA	NA	NA
Total_exclusive	MRPL8	12046000	17207000	10709000	NA	NA	NA
Total_exclusive	DBP7	2588800	1448000	1932500	NA	NA	NA
Total_exclusive	POP2	11699000	7397900	9433400	NA	NA	NA
Total_exclusive	AFG3	3277300	1724600	5408400	NA	NA	NA
Total_exclusive	RNR4	6596600	1798500	3339300	NA	NA	NA
Total_exclusive	YGR266W	3093700	1324200	376050	NA	NA	NA
Total_exclusive	HEH2	3352300	1974300	5278900	NA	NA	NA
Total_exclusive	ARP2	11572000	1671800	3950800	NA	NA	NA
Total_exclusive	RFC4	2840700	2171500	2024200	NA	NA	NA
Total_exclusive	ERG10	6212600	1397100	2825300	NA	NA	NA
Total_exclusive	CKI1	3944400	4500400	2871800	NA	NA	NA
Total_exclusive	PHO84	49085000	11920000	56279000	NA	NA	NA
Total_exclusive	VPS35	2080300	607770	1544100	NA	NA	NA
Total_exclusive	DHR2	1179900	0	295540	NA	NA	NA
Total_exclusive	SEC31	3466900	304580	503600	NA	NA	NA
Total_exclusive	EMC2	7107700	1574800	36505000	NA	NA	NA
Total_exclusive	HCH1	19380000	62872000	34692000	NA	NA	NA
Total_exclusive	RLP24	152550000	207630000	154570000	NA	NA	NA
Total_exclusive	NOT5	7213200	4538900	8125900	NA	NA	NA
Total_exclusive	ENA1	1170500	1309800	2044800	NA	NA	NA
Total_exclusive	FRS2	3801600	1387600	2095300	NA	NA	NA
Total_exclusive	PEP1	870360	594440	864750	NA	NA	NA
Total_exclusive	MRPL10	6607600	7184900	10195000	NA	NA	NA
Total_exclusive	HLJ1	25922000	7012600	26026000	NA	NA	NA
Total_exclusive	LCB4	3891300	1117700	1662300	NA	NA	NA
Total_exclusive	ATP4	6545500	8934600	33919000	NA	NA	NA
Total_exclusive	SST2	470880	165130	1137200	NA	NA	NA
Total_exclusive	IDI1	10204000	5564500	7172000	NA	NA	NA
Total_exclusive	SEC15	2547600	728750	1966600	NA	NA	NA
Total_exclusive	HXT2	13331000	7365700	12488000	NA	NA	NA
Total_exclusive	YOR1	541040	0	498230	NA	NA	NA
Total_exclusive	RBG2	1731200	1440300	1676500	NA	NA	NA
Total_exclusive	RPO21	1432300	479860	1328200	NA	NA	NA
Total_exclusive	PRE1	24058000	15378000	11920000	NA	NA	NA
Total_exclusive	YBT1	2218500	119390	476060	NA	NA	NA
Total_exclusive	SAP185	1794800	1118700	1018500	NA	NA	NA
Total_exclusive	KRE2	3351100	1066900	3254100	NA	NA	NA
Total_exclusive	WHI3	4983500	11693000	10993000	NA	NA	NA
Total_exclusive	MNN10	7230900	2551400	30055000	NA	NA	NA
Total_exclusive	YGR250C	1418500	1082500	2989000	NA	NA	NA
Total_exclusive	IPP1	6321900	4786500	6626500	NA	NA	NA
Total_exclusive	OPI3	14215000	22418000	25146000	NA	NA	NA
Total_exclusive	DUN1	1490200	1059600	792380	NA	NA	NA
Total_exclusive	HOM3	3332500	3359600	1470400	NA	NA	NA
Total_exclusive	SAR1	6182900	12481000	15257000	NA	NA	NA
Total_exclusive	RDH54	714850	181730	948790	NA	NA	NA
Total_exclusive	BAT1	12357000	5685200	3052900	NA	NA	NA
Total_exclusive	YBP2	1810100	2670200	2418700	NA	NA	NA
Total_exclusive	LOA1	8350800	8553100	10726000	NA	NA	NA
Total_exclusive	BUD20	10503000	25067000	20754000	NA	NA	NA
Total_exclusive	RPC34	12183000	0	6183200	NA	NA	NA
Total_exclusive	GEA1	158670	807740	1167200	NA	NA	NA
Total_exclusive	NUP84	3130200	1164000	2302300	NA	NA	NA
Total_exclusive	ARE2	15997000	11370000	14055000	NA	NA	NA
Total_exclusive	MRPL22	11183000	6945800	9646000	NA	NA	NA
Total_exclusive	NSG2	18495000	7135700	17021000	NA	NA	NA
Total_exclusive	RSN1	1573500	379670	1047500	NA	NA	NA
Total_exclusive	VPS29	12220000	5057000	9154100	NA	NA	NA
Total_exclusive	XDJ1	3591200	1129700	1112700	NA	NA	NA
Total_exclusive	BLM10	1124800	0	56565	NA	NA	NA
Total_exclusive	YPT1	5933700	8623500	10826000	NA	NA	NA
Total_exclusive	ZUO1	7064500	3343400	4471000	NA	NA	NA
Total_exclusive	MNN9	11446000	3986700	36697000	NA	NA	NA
Total_exclusive	EMP47	7118100	24813000	8236000	NA	NA	NA
Total_exclusive	SRP1	9605100	4128600	6843100	NA	NA	NA
Total_exclusive	DAS2	12632000	14331000	20904000	NA	NA	NA
Total_exclusive	INO80	862200	363110	2058600	NA	NA	NA
Total_exclusive	SEC5	903490	393360	567530	NA	NA	NA
Total_exclusive	VPS13	1053600	59933	46103	NA	NA	NA
Total_exclusive	CDC34	8505800	10113000	17723000	NA	NA	NA
Total_exclusive	SRP102	8482100	11312000	9681600	NA	NA	NA
Total_exclusive	FAA3	2846700	3732800	439950	NA	NA	NA
Total_exclusive	COG3	2336900	482840	416130	NA	NA	NA
Total_exclusive	ARP9	5615500	2839900	2963100	NA	NA	NA
Total_exclusive	ALG11	1721000	2183700	2091400	NA	NA	NA
Total_exclusive	RPA49	3518800	1487200	3363400	NA	NA	NA
Total_exclusive	RSM28	3927200	5488000	4848600	NA	NA	NA
Total_exclusive	MET3	6594900	4082700	5608100	NA	NA	NA
Total_exclusive	AHP1	23107000	17817000	15142000	NA	NA	NA
Total_exclusive	RSM7	2435700	12674000	5978700	NA	NA	NA
Total_exclusive	HHT1	128020000	431540000	246940000	NA	NA	NA
Total_exclusive	MRPS5	16346000	23688000	10038000	NA	NA	NA
Total_exclusive	EPS1	3096800	139690	1404600	NA	NA	NA
Total_exclusive	MRPL49	24981000	8716100	7663500	NA	NA	NA
Total_exclusive	RSC9	1571600	1524200	2031300	NA	NA	NA
Total_exclusive	YMR310C	3401600	3153700	7421800	NA	NA	NA
Total_exclusive	CPR1	10511000	26507000	33474000	NA	NA	NA
Total_exclusive	SEC62	15987000	20055000	18869000	NA	NA	NA
Total_exclusive	USO1	923380	55392	169300	NA	NA	NA
Total_exclusive	STH1	739280	0	687530	NA	NA	NA
Total_exclusive	COY1	905030	559080	1118500	NA	NA	NA
Total_exclusive	BUD23	37983000	15688000	11021000	NA	NA	NA
Total_exclusive	RPN12	11890000	3065500	3812700	NA	NA	NA
Total_exclusive	APL6	2645100	316140	872090	NA	NA	NA
Total_exclusive	UBX2	8304200	2378900	6916300	NA	NA	NA
Total_exclusive	GLN4	1815600	165590	407360	NA	NA	NA
Total_exclusive	SEC11	15711000	5856200	6717500	NA	NA	NA
Total_exclusive	LTV1	14391000	5975500	8635600	NA	NA	NA
Total_exclusive	TBF1	2838600	2096100	2293200	NA	NA	NA
Total_exclusive	DFM1	22844000	16148000	16420000	NA	NA	NA
Total_exclusive	ASN1	5396200	2831400	4085100	NA	NA	NA
Total_exclusive	HST2	5670800	5315900	8496200	NA	NA	NA
Total_exclusive	ARP4	2242700	1907000	6383600	NA	NA	NA
Total_exclusive	ACL4	3530900	5244400	6906800	NA	NA	NA
Total_exclusive	ERG20	6627800	2403400	3855300	NA	NA	NA
Total_exclusive	GPA1	438130	2402300	2133100	NA	NA	NA
Total_exclusive	RPP1	5124400	3782400	2840600	NA	NA	NA
Total_exclusive	ASG1	995800	1478500	1695700	NA	NA	NA
Total_exclusive	SAM37	3303800	2701200	6293000	NA	NA	NA
Total_exclusive	PGM1	26571000	1876200	2722300	NA	NA	NA
Total_exclusive	CCA1	1758400	1212800	337730	NA	NA	NA
Total_exclusive	PUP3	21889000	28926000	32358000	NA	NA	NA
Total_exclusive	ALG5	3851500	3719100	1901800	NA	NA	NA
Total_exclusive	MPH1	72147	117450	164220	NA	NA	NA
Total_exclusive	NUP116	517060	2005700	4680400	NA	NA	NA
Total_exclusive	VTC3	3214900	0	11649000	NA	NA	NA
Total_exclusive	IDP1	2874500	892820	1687700	NA	NA	NA
Total_exclusive	MGR1	2977200	1182800	2939000	NA	NA	NA
Total_exclusive	SCT1	1107000	1435900	2693600	NA	NA	NA
Total_exclusive	MRPS18	4319300	5016900	7138600	NA	NA	NA
Total_exclusive	TOM22	7050500	42878000	179180000	NA	NA	NA
Total_exclusive	TRM82	4393000	2328100	1800700	NA	NA	NA
Total_exclusive	NOP53	1133700	0	1895500	NA	NA	NA
Total_exclusive	EFG1	18647000	11213000	17873000	NA	NA	NA
Total_exclusive	FSH3	6076300	5664900	7166900	NA	NA	NA
Total_exclusive	ERG3	7570800	26030000	31174000	NA	NA	NA
Total_exclusive	MRP20	16753000	3632300	7124900	NA	NA	NA
Total_exclusive	LST8	13531000	4212800	7613300	NA	NA	NA
Total_exclusive	COG8	1536100	948900	1623600	NA	NA	NA
Total_exclusive	NTE1	192550	713360	1378900	NA	NA	NA
Total_exclusive	ERG12	6000800	0	1442100	NA	NA	NA
Total_exclusive	HOM6	2682600	4073500	6180400	NA	NA	NA
Total_exclusive	SEC8	1659000	601870	349800	NA	NA	NA
Total_exclusive	CDC36	11412000	10942000	17991000	NA	NA	NA
Total_exclusive	EMP24	8942200	0	38767000	NA	NA	NA
Total_exclusive	TIM23	844470	8247300	37949000	NA	NA	NA
Total_exclusive	MOT2	1437300	3596100	3573900	NA	NA	NA
Total_exclusive	PRE6	24188000	5564100	10341000	NA	NA	NA
Total_exclusive	APS3	21057000	26507000	30775000	NA	NA	NA
Total_exclusive	RCF2	33642000	24479000	22524000	NA	NA	NA
Total_exclusive	HTZ1	0	115090000	228810000	NA	NA	NA
Total_exclusive	CKA1	3693500	0	300150	NA	NA	NA
Total_exclusive	FPR1	20831000	24990000	23262000	NA	NA	NA
Total_exclusive	ELO2	54456000	42295000	60485000	NA	NA	NA
Total_exclusive	CPS1	5361400	0	3610200	NA	NA	NA
Total_exclusive	ARP3	12011000	0	719720	NA	NA	NA
Total_exclusive	ASN2	4682800	2607900	5277500	NA	NA	NA
Total_exclusive	SHS1	1660100	1144000	2398700	NA	NA	NA
Total_exclusive	APE2	2293300	675260	570030	NA	NA	NA
Total_exclusive	MCD4	3521300	2363300	1790100	NA	NA	NA
Total_exclusive	HMT1	8446400	14507000	0	NA	NA	NA
Total_exclusive	YHR127W	2691300	2559800	3741500	NA	NA	NA
Total_exclusive	MLC1	0	9206000	20483000	NA	NA	NA
Total_exclusive	RRP6	383700	955680	319010	NA	NA	NA
Total_exclusive	UTP23	10506000	3878000	4216000	NA	NA	NA
Total_exclusive	RNR2	5715600	465230	1541100	NA	NA	NA
Total_exclusive	THR4	3198100	1473100	1004000	NA	NA	NA
Total_exclusive	EMC1	0	476870	18360000	NA	NA	NA
Total_exclusive	DNF1	818100	0	1869300	NA	NA	NA
Total_exclusive	COX13	21904000	28535000	107690000	NA	NA	NA
Total_exclusive	BOI1	111790	282270	361570	NA	NA	NA
Total_exclusive	EIS1	1889600	331720	1130500	NA	NA	NA
Total_exclusive	QCR7	0	24869000	290360000	NA	NA	NA
Total_exclusive	HIS4	3933500	1673600	1428000	NA	NA	NA
Total_exclusive	URA3	1468800	0	850610	NA	NA	NA
Total_exclusive	DST1	3951200	10297000	2242800	NA	NA	NA
Total_exclusive	RPB8	19306000	11544000	0	NA	NA	NA
Total_exclusive	SRP21	53581000	58726000	45238000	NA	NA	NA
Total_exclusive	TOR1	195340	51523	131620	NA	NA	NA
Total_exclusive	ADE6	305940	561590	499760	NA	NA	NA
Total_exclusive	PMT3	7482300	4435900	2529600	NA	NA	NA
Total_exclusive	ERG28	47915000	0	53483000	NA	NA	NA
Total_exclusive	ARD1	11345000	9977500	3895900	NA	NA	NA
Total_exclusive	DRS1	0	1460500	1978700	NA	NA	NA
Total_exclusive	CTP1	7966300	11187000	6034200	NA	NA	NA
Total_exclusive	CRG1	10628000	3791000	7019500	NA	NA	NA
Total_exclusive	MAM33	12605000	7631800	13530000	NA	NA	NA
Total_exclusive	YPQ1	14888000	28925000	31544000	NA	NA	NA
Total_exclusive	GAA1	3522900	2176300	4554000	NA	NA	NA
Total_exclusive	RET2	11545000	6282400	0	NA	NA	NA
Total_exclusive	NOP15	67935000	37540000	24724000	NA	NA	NA
Total_exclusive	YPT31	1146800	5423400	6540500	NA	NA	NA
Total_exclusive	MOD5	1785800	1171000	1836300	NA	NA	NA
Total_exclusive	PRO1	4823200	1952000	3713600	NA	NA	NA
Total_exclusive	GCG1	13434000	12067000	15683000	NA	NA	NA
Total_exclusive	COX4	18806000	19528000	183800000	NA	NA	NA
Total_exclusive	FRS1	2375000	855970	716720	NA	NA	NA
Total_exclusive	MRPL6	9185000	8950100	6122600	NA	NA	NA
Total_exclusive	PTC3	10334000	5213700	8295200	NA	NA	NA
Total_exclusive	MRPL11	4738000	6548200	7938700	NA	NA	NA
Total_exclusive	OTU2	8090100	56920000	4587400	NA	NA	NA
Total_exclusive	RKM2	1550900	690550	1250100	NA	NA	NA
Total_exclusive	YHR122W	12071000	13458000	17800000	NA	NA	NA
Total_exclusive	SHE4	618990	360610	1461500	NA	NA	NA
Total_exclusive	DNM1	2041800	185600	406380	NA	NA	NA
Total_exclusive	YMR295C	0	11078000	37273000	NA	NA	NA
Total_exclusive	HRT1	37604000	35242000	64869000	NA	NA	NA
Total_exclusive	TCD2	2872100	2796800	4664600	NA	NA	NA
Total_exclusive	STV1	1374900	0	7813900	NA	NA	NA
Total_exclusive	LYS12	5465000	1775500	1657900	NA	NA	NA
Total_exclusive	POP1	1236000	286210	500730	NA	NA	NA
Total_exclusive	YGL140C	581430	532030	373960	NA	NA	NA
Total_exclusive	TPS1	6512000	2092600	1153900	NA	NA	NA
Total_exclusive	TIM50	950460	2400000	3124300	NA	NA	NA
Total_exclusive	FRE1	1590300	1048100	2405400	NA	NA	NA
Total_exclusive	UTP30	556170	696140	437110	NA	NA	NA
Total_exclusive	TAH11	556630	247630	937090	NA	NA	NA
Total_exclusive	NPL3	3794000	3419500	4184700	NA	NA	NA
Total_exclusive	MHR1	14754000	7427700	10738000	NA	NA	NA
Total_exclusive	LAG1	4860200	3706800	2814600	NA	NA	NA
Total_exclusive	MSH1	0	301080	469960	NA	NA	NA
Total_exclusive	PRE2	7337200	2897600	3236700	NA	NA	NA
Total_exclusive	SRP40	21531000	18354000	21401000	NA	NA	NA
Total_exclusive	RKM3	2186800	0	2922200	NA	NA	NA
Total_exclusive	RPN11	5798500	7469000	8729200	NA	NA	NA
Total_exclusive	SVL3	4361700	92912	936430	NA	NA	NA
Total_exclusive	YDR476C	17640000	18845000	10396000	NA	NA	NA
Total_exclusive	SPC2	14743000	6786000	8538500	NA	NA	NA
Total_exclusive	RQC1	2343400	0	949680	NA	NA	NA
Total_exclusive	YLH47	1274700	1354100	2388700	NA	NA	NA
Total_exclusive	GPB1	959800	523690	225750	NA	NA	NA
Total_exclusive	DPH6	1420600	0	1294000	NA	NA	NA
Total_exclusive	BGL2	10663000	31533000	25297000	NA	NA	NA
Total_exclusive	AAT2	6702500	2902500	1812500	NA	NA	NA
Total_exclusive	CHD1	114980	1003900	1312600	NA	NA	NA
Total_exclusive	DRS2	715000	0	643630	NA	NA	NA
Total_exclusive	HSH155	368610	816460	1202800	NA	NA	NA
Total_exclusive	DNF2	1724300	196220	1184000	NA	NA	NA
Total_exclusive	PSK1	442460	345420	0	NA	NA	NA
Total_exclusive	YDR089W	501650	1144900	899600	NA	NA	NA
Total_exclusive	SPE3	14403000	3271900	1471800	NA	NA	NA
Total_exclusive	ORT1	6328100	12094000	20496000	NA	NA	NA
Total_exclusive	RQC2	2066500	437490	780790	NA	NA	NA
Total_exclusive	VMA4	174190	5042600	27309000	NA	NA	NA
Total_exclusive	ARG1	4930900	2109900	1114800	NA	NA	NA
Total_exclusive	RFA3	20028000	26191000	40174000	NA	NA	NA
Total_exclusive	URK1	2848300	1812100	0	NA	NA	NA
Total_exclusive	PMT6	2044600	1795200	857160	NA	NA	NA
Total_exclusive	PHO8	9716500	0	8949700	NA	NA	NA
Total_exclusive	CST26	1197000	1970400	3379800	NA	NA	NA
Total_exclusive	GCD10	6147400	5719300	6148700	NA	NA	NA
Total_exclusive	RLF2	1210800	8604100	2378000	NA	NA	NA
Total_exclusive	SUI2	3193200	0	1809000	NA	NA	NA
Total_exclusive	PRE8	7391100	16006000	20302000	NA	NA	NA
Total_exclusive	RVS161	1237000	0	1904900	NA	NA	NA
Total_exclusive	SPT5	586890	536760	300450	NA	NA	NA
Total_exclusive	PRE3	7408800	9968900	3893900	NA	NA	NA
Total_exclusive	COX15	7324200	7063200	6924400	NA	NA	NA
Total_exclusive	EFM5	10241000	7058400	7371400	NA	NA	NA
Total_exclusive	RPM2	739150	0	888900	NA	NA	NA
Total_exclusive	RSM10	12120000	13884000	13939000	NA	NA	NA
Total_exclusive	TIM11	20250000	27048000	41759000	NA	NA	NA
Total_exclusive	TYR1	4802400	1596300	1681000	NA	NA	NA
Total_exclusive	GBP2	7710100	1772700	1846000	NA	NA	NA
Total_exclusive	PDC2	637820	638800	1211300	NA	NA	NA
Total_exclusive	IPI1	1060200	3738500	2006100	NA	NA	NA
Total_exclusive	VPS74	3454500	2352700	3543800	NA	NA	NA
Total_exclusive	SIT4	3761300	2296800	1801100	NA	NA	NA
Total_exclusive	CHA1	1017400	6064200	2055300	NA	NA	NA
Total_exclusive	VMA8	8108000	2103300	5706100	NA	NA	NA
Total_exclusive	HOC1	3309000	2240000	35306000	NA	NA	NA
Total_exclusive	ERV25	11008000	0	16317000	NA	NA	NA
Total_exclusive	MRPL1	2726700	667530	6743200	NA	NA	NA
Total_exclusive	PRI1	1420400	1154600	1425500	NA	NA	NA
Total_exclusive	PTM1	9931500	3654100	8731700	NA	NA	NA
Total_exclusive	POL12	1346100	932300	1722700	NA	NA	NA
Total_exclusive	DBP6	0	306370	1467400	NA	NA	NA
Total_exclusive	COG6	293320	636580	685730	NA	NA	NA
Total_exclusive	RRP14	3427900	1754000	1286400	NA	NA	NA
Total_exclusive	ISC1	1217400	3107300	1574700	NA	NA	NA
Total_exclusive	SMB1	9104800	0	2717200	NA	NA	NA
Total_exclusive	ELO3	22798000	6554500	4334900	NA	NA	NA
Total_exclusive	LIA1	5690000	2789400	2486700	NA	NA	NA
Total_exclusive	ORC5	515510	2436800	3296100	NA	NA	NA
Total_exclusive	SNO1	32787000	10778000	7993400	NA	NA	NA
Total_exclusive	DUR1	411610	53401	0	NA	NA	NA
Total_exclusive	PTR2	689310	2628400	3699400	NA	NA	NA
Total_exclusive	HSM3	3789100	539350	928070	NA	NA	NA
Total_exclusive	SMC2	115120	223530	1059300	NA	NA	NA
Total_exclusive	SPC3	12443000	996130	2276500	NA	NA	NA
Total_exclusive	LSP1	14441000	4199800	6135800	NA	NA	NA
Total_exclusive	HSP42	11355000	6494300	6876100	NA	NA	NA
Total_exclusive	VTH1	130610	0	325850	NA	NA	NA
Total_exclusive	KRE6	2211800	1000400	4232700	NA	NA	NA
Total_exclusive	UGP1	887940	378420	1601100	NA	NA	NA
Total_exclusive	LCP5	3093200	2437100	4033400	NA	NA	NA
Total_exclusive	ERP1	6032400	7121400	54554000	NA	NA	NA
Total_exclusive	PST2	7209900	822640	2066800	NA	NA	NA
Total_exclusive	APM4	1784800	0	121540	NA	NA	NA
Total_exclusive	SSF1	0	562820	2532900	NA	NA	NA
Total_exclusive	KEX1	1811300	0	565800	NA	NA	NA
Total_exclusive	HPR1	831800	280680	724550	NA	NA	NA
Total_exclusive	ARO2	5637200	0	2128900	NA	NA	NA
Total_exclusive	CDC3	2839700	347220	179520	NA	NA	NA
Total_exclusive	SOF1	1904400	888240	858700	NA	NA	NA
Total_exclusive	GVP36	611510	2420700	2038600	NA	NA	NA
Total_exclusive	EBS1	577010	0	1725300	NA	NA	NA
Total_exclusive	FMP42	368440	1127500	580680	NA	NA	NA
Total_exclusive	ARP7	1160200	853900	952140	NA	NA	NA
Total_exclusive	PUB1	38563000	13549000	28775000	NA	NA	NA
Total_exclusive	RPC19	0	12818000	14229000	NA	NA	NA
Total_exclusive	TOM20	0	11108000	23664000	NA	NA	NA
Total_exclusive	CDC1	2663200	0	8550100	NA	NA	NA
Total_exclusive	PUP1	5473700	14480000	4410500	NA	NA	NA
Total_exclusive	NPL6	2049200	2403200	1082200	NA	NA	NA
Total_exclusive	YPT7	3522400	0	6699800	NA	NA	NA
Total_exclusive	APL2	2100500	0	440770	NA	NA	NA
Total_exclusive	IRR1	279600	388050	459250	NA	NA	NA
Total_exclusive	RSM27	19240000	18320000	13005000	NA	NA	NA
Total_exclusive	SAM50	637870	573830	798840	NA	NA	NA
Total_exclusive	RRS1	3821800	1288600	5697000	NA	NA	NA
Total_exclusive	ARP8	353920	455900	2052900	NA	NA	NA
Total_exclusive	DSS4	10306000	15236000	15337000	NA	NA	NA
Total_exclusive	TAF14	3217100	5561100	6047100	NA	NA	NA
Total_exclusive	RPB3	1759300	1417500	2688000	NA	NA	NA
Total_exclusive	CDC12	743000	0	677880	NA	NA	NA
Total_exclusive	TMA108	858670	0	129350	NA	NA	NA
Total_exclusive	TIM54	1174100	866590	176670	NA	NA	NA
Total_exclusive	YNR040W	1777600	2457600	2118000	NA	NA	NA
Total_exclusive	VBA4	8894800	6556300	9700600	NA	NA	NA
Total_exclusive	NPC2	1075400	7836800	12588000	NA	NA	NA
Total_exclusive	DCP1	4651100	516860	4919800	NA	NA	NA
Total_exclusive	VAR1	1275000	5768000	3389800	NA	NA	NA
Total_exclusive	YME1	1721800	0	1933600	NA	NA	NA
Total_exclusive	RET3	13784000	10630000	13920000	NA	NA	NA
Total_exclusive	YLR287C	0	626930	1517200	NA	NA	NA
Total_exclusive	LCB5	1013800	290800	316720	NA	NA	NA
Total_exclusive	TRM8	3592100	2033000	4566700	NA	NA	NA
Total_exclusive	HIS1	18242000	20535000	18528000	NA	NA	NA
Total_exclusive	NDI1	6395500	639400	413280	NA	NA	NA
Total_exclusive	UTP11	0	6088200	1423000	NA	NA	NA
Total_exclusive	NST1	813460	482040	1268500	NA	NA	NA
Total_exclusive	TAF12	948400	894750	337290	NA	NA	NA
Total_exclusive	TRM12	0	1113100	1154600	NA	NA	NA
Total_exclusive	SKT5	666690	721970	1591000	NA	NA	NA
Total_exclusive	MBP1	1014500	147490	604340	NA	NA	NA
Total_exclusive	STI1	1340100	0	307820	NA	NA	NA
Total_exclusive	FUR1	1776400	613800	3144900	NA	NA	NA
Total_exclusive	ZRC1	10015000	0	14107000	NA	NA	NA
Total_exclusive	RPC53	5619100	2837300	4514600	NA	NA	NA
Total_exclusive	PEP3	442940	0	178640	NA	NA	NA
Total_exclusive	ANP1	3595900	0	35635000	NA	NA	NA
Total_exclusive	GAT1	0	1305200	2223800	NA	NA	NA
Total_exclusive	MTR4	1210600	104800	268910	NA	NA	NA
Total_exclusive	HHO1	2933800	3349500	2547900	NA	NA	NA
Total_exclusive	FMP30	971090	514990	994990	NA	NA	NA
Total_exclusive	ESC1	328310	0	290780	NA	NA	NA
Total_exclusive	YOS9	1891600	420780	1583300	NA	NA	NA
Total_exclusive	ATP5	0	3661400	9934500	NA	NA	NA
Total_exclusive	GAP1	236290	1844100	586180	NA	NA	NA
Total_exclusive	MRPL15	6653800	6415700	8233600	NA	NA	NA
Total_exclusive	GLE2	407450	0	2765800	NA	NA	NA
Total_exclusive	ARC35	7010300	0	737590	NA	NA	NA
Total_exclusive	SNU13	5124600	20935000	29272000	NA	NA	NA
Total_exclusive	GSP1	21944000	5841600	18659000	NA	NA	NA
Total_exclusive	TAL1	2241600	2913400	2518600	NA	NA	NA
Total_exclusive	RPB5	14537000	3794500	3133800	NA	NA	NA
Total_exclusive	RSA4	1615500	2050800	103100	NA	NA	NA
Total_exclusive	ERG2	0	13165000	31635000	NA	NA	NA
Total_exclusive	RIM1	7250800	34253000	17633000	NA	NA	NA
Total_exclusive	PBP2	3131000	2476300	1936200	NA	NA	NA
Total_exclusive	DMA1	458040	2200400	623060	NA	NA	NA
Total_exclusive	CCC1	6016100	5084700	6136300	NA	NA	NA
Total_exclusive	CCM1	934350	400530	570470	NA	NA	NA
Total_exclusive	CPR6	3903900	3155600	3158900	NA	NA	NA
Total_exclusive	APL4	2001800	0	138260	NA	NA	NA
Total_exclusive	BMT6	1201400	0	790640	NA	NA	NA
Total_exclusive	NUP53	0	39135000	6978600	NA	NA	NA
Total_exclusive	UBR1	27889	43637	241470	NA	NA	NA
Total_exclusive	PRP8	589080	280940	190230	NA	NA	NA
Total_exclusive	TAO3	121260	123410	0	NA	NA	NA
Total_exclusive	GUP1	1235000	2747700	2898600	NA	NA	NA
Total_exclusive	GYP5	1147800	0	789850	NA	NA	NA
Total_exclusive	WTM1	2449500	0	3590800	NA	NA	NA
Total_exclusive	CBP3	2026200	3131700	1126400	NA	NA	NA
Total_exclusive	ORM1	11916000	11106000	6187300	NA	NA	NA
Total_exclusive	LYP1	3038600	339640	0	NA	NA	NA
Total_exclusive	HSP26	13986000	7908300	24134000	NA	NA	NA
Total_exclusive	FUS3	1356000	1079100	945320	NA	NA	NA
Total_exclusive	SEC14	1611900	458920	2011100	NA	NA	NA
Total_exclusive	RML2	3445100	3144900	1932600	NA	NA	NA
Total_exclusive	RSP5	394050	0	720040	NA	NA	NA
Total_exclusive	DDI1	1651600	0	31596000	NA	NA	NA
Total_exclusive	ADI1	2815600	8272000	6710300	NA	NA	NA
Total_exclusive	ASM4	1243100	322030	3188100	NA	NA	NA
Total_exclusive	MIC10	32785000	2102400	23260000	NA	NA	NA
Total_exclusive	BAP2	968720	712520	2250800	NA	NA	NA
Total_exclusive	CDC9	288490	783520	210950	NA	NA	NA
Total_exclusive	RPO41	1030600	0	221760	NA	NA	NA
Total_exclusive	MRPL33	645810000	16259000	15934000	NA	NA	NA
Total_exclusive	CHS3	0	520510	556090	NA	NA	NA
Total_exclusive	GEM1	818600	1611600	1965300	NA	NA	NA
Total_exclusive	SEN1	197730	146330	147570	NA	NA	NA
Total_exclusive	TRS31	1335000	2833200	3429000	NA	NA	NA
Total_exclusive	SWI6	813030	0	247920	NA	NA	NA
Total_exclusive	NPR1	612270	260350	0	NA	NA	NA
Total_exclusive	ARC19	9379100	3636600	7777300	NA	NA	NA
Total_exclusive	YIL108W	1002100	800060	1006000	NA	NA	NA
Total_exclusive	RPA43	11681000	2359400	2380500	NA	NA	NA
Total_exclusive	APT1	8755000	1517800	6567600	NA	NA	NA
Total_exclusive	YGL117W	5525700	0	4097400	NA	NA	NA
Total_exclusive	FAR8	657810	512090	0	NA	NA	NA
Total_exclusive	SPN1	0	941260	1707600	NA	NA	NA
Total_exclusive	TRS33	1991400	2463800	1787200	NA	NA	NA
Total_exclusive	FMP10	2768900	3228000	5089700	NA	NA	NA
Total_exclusive	WRS1	269850	0	527580	NA	NA	NA
Total_exclusive	SRV2	761940	1333000	1892500	NA	NA	NA
Total_exclusive	PRE7	8007500	1496300	0	NA	NA	NA
Total_exclusive	ARO4	2204000	5683200	2923700	NA	NA	NA
Total_exclusive	ERG24	3303500	0	9012800	NA	NA	NA
Total_exclusive	SQS1	861750	0	179210	NA	NA	NA
Total_exclusive	ERV41	1434400	1535100	957120	NA	NA	NA
Total_exclusive	WHI4	1460100	480500	1571100	NA	NA	NA
Total_exclusive	REX4	5254000	4090700	3662300	NA	NA	NA
Total_exclusive	MRPL23	21880000	12459000	6911700	NA	NA	NA
Total_exclusive	HRR25	187900	276770	782710	NA	NA	NA
Total_exclusive	BEM1	737670	3265200	3150800	NA	NA	NA
Total_exclusive	CBP2	701690	473740	1018300	NA	NA	NA
Total_exclusive	STE5	169500	0	718440	NA	NA	NA
Total_exclusive	YBR287W	4059400	4669100	7480300	NA	NA	NA
Total_exclusive	NSG1	7027100	0	12312000	NA	NA	NA
Total_exclusive	RVS167	8081200	1034700	847030	NA	NA	NA
Total_exclusive	BIM1	1336400	0	2015900	NA	NA	NA
Total_exclusive	HFD1	3550800	258740	0	NA	NA	NA
Total_exclusive	RSE1	26222	176100	107540	NA	NA	NA
Total_exclusive	NDC1	1333100	262220	1737700	NA	NA	NA
Total_exclusive	FRD1	736070	153080	757730	NA	NA	NA
Total_exclusive	YEL043W	203710	0	294500	NA	NA	NA
Total_exclusive	CYB5	48307000	28278000	81719000	NA	NA	NA
Total_exclusive	MUP1	6347900	3681700	6137600	NA	NA	NA
Total_exclusive	TOF1	223120	0	244730	NA	NA	NA
Total_exclusive	RHO3	1222100	0	3497200	NA	NA	NA
Total_exclusive	ACK1	16854000	82902	499830	NA	NA	NA
Total_exclusive	GAS5	2327200	0	5846200	NA	NA	NA
Total_exclusive	SLT2	4146600	2929200	1622000	NA	NA	NA
Total_exclusive	BOI2	184160	421210	351530	NA	NA	NA
Total_exclusive	POP5	2641000	0	2038700	NA	NA	NA
Total_exclusive	SEA4	242190	391410	238640	NA	NA	NA
Total_exclusive	CKB2	1732500	1226700	1753800	NA	NA	NA
Total_exclusive	ELP2	448580	0	418770	NA	NA	NA
Total_exclusive	RSM26	1451900	0	8392300	NA	NA	NA
Total_exclusive	SAM3	3650900	9262900	4686400	NA	NA	NA
Total_exclusive	TAE1	0	13321000	12829000	NA	NA	NA
Total_exclusive	PTC2	5649600	0	1476900	NA	NA	NA
Total_exclusive	ORC3	409330	864680	224710	NA	NA	NA
Total_exclusive	CTR9	299270	0	125820	NA	NA	NA
Total_exclusive	BUD21	304480	0	1380400	NA	NA	NA
Total_exclusive	ADE5	955720	44042	393810	NA	NA	NA
Total_exclusive	KSS1	1026000	0	613440	NA	NA	NA
Total_exclusive	UBA1	415490	294750	0	NA	NA	NA
Total_exclusive	VID27	398730	482100	1282100	NA	NA	NA
Total_exclusive	MRPS16	0	16836000	7932800	NA	NA	NA
Total_exclusive	SLF1	1308800	942820	1916000	NA	NA	NA
Total_exclusive	RPN13	23726000	11128000	15202000	NA	NA	NA
Total_exclusive	KGD1	699830	367090	595000	NA	NA	NA
Total_exclusive	RFT1	1435500	1580200	2239300	NA	NA	NA
Total_exclusive	GCD14	4344900	2386400	803050	NA	NA	NA
Total_exclusive	ALE1	1089100	1008600	3731900	NA	NA	NA
Total_exclusive	SAC6	304600	0	749570	NA	NA	NA
Total_exclusive	STE2	4168900	2932200	4631300	NA	NA	NA
Total_exclusive	FCY2	6408500	3432100	0	NA	NA	NA
Total_exclusive	SMC1	15289	0	376180	NA	NA	NA
Total_exclusive	MRH4	0	1096200	509720	NA	NA	NA
Total_exclusive	HDA1	0	336590	120100	NA	NA	NA
Total_exclusive	ORC4	847100	67612	784090	NA	NA	NA
Total_exclusive	CIR2	1461200	977360	942270	NA	NA	NA
Total_exclusive	NBP2	4929600	4408400	4204400	NA	NA	NA
Total_exclusive	TPT1	876330	0	3226300	NA	NA	NA
Total_exclusive	LSB3	1427100	913520	0	NA	NA	NA
Total_exclusive	CHS2	215960	444140	1041200	NA	NA	NA
Total_exclusive	SWI3	280860	0	326690	NA	NA	NA
Total_exclusive	TOR2	24789	0	69294	NA	NA	NA
Total_exclusive	VMA22	121480	0	22534000	NA	NA	NA
Total_exclusive	STE24	3241000	0	26319000	NA	NA	NA
Total_exclusive	URA8	1202700	0	506640	NA	NA	NA
Total_exclusive	STE20	29687	0	387360	NA	NA	NA
Total_exclusive	JIP5	4206100	3085900	1640200	NA	NA	NA
Total_exclusive	AGC1	296540	0	458240	NA	NA	NA
Total_exclusive	IRA2	179340	0	67973	NA	NA	NA
Total_exclusive	SNU114	629110	161540	280180	NA	NA	NA
Total_exclusive	MDM38	0	1367400	1067900	NA	NA	NA
Total_exclusive	CDC53	0	416870	399570	NA	NA	NA
Total_exclusive	ICE2	1083100	965830	2057300	NA	NA	NA
Total_exclusive	SMC5	0	31766000	117080000	NA	NA	NA
Total_exclusive	PSP1	515830	184190	98678	NA	NA	NA
Total_exclusive	RHO1	10537000	7828300	15445000	NA	NA	NA
Total_exclusive	MRPL38	3050600	7113200	3636800	NA	NA	NA
Total_exclusive	TEL2	370650	508620	888870	NA	NA	NA
Total_exclusive	MCY1	0	293870	3569200	NA	NA	NA
Total_exclusive	LSC1	1485700	2270000	1852100	NA	NA	NA
Total_exclusive	ENV9	10491000	4783200	5956200	NA	NA	NA
Total_exclusive	VAC14	602040	10335000	0	NA	NA	NA
Total_exclusive	SEC39	625700	173090	0	NA	NA	NA
Total_exclusive	HIP1	2122000	780910	0	NA	NA	NA
Total_exclusive	CHS1	231150	250740	1024300	NA	NA	NA
Total_exclusive	CSC1	1639100	0	1858800	NA	NA	NA
Total_exclusive	SSP120	0	3861600	6733800	NA	NA	NA
Total_exclusive	NBP35	5155200	4973500	0	NA	NA	NA
Total_exclusive	SKI8	10285000	0	2242900	NA	NA	NA
Total_exclusive	DIC1	0	2189200	2173000	NA	NA	NA
Total_exclusive	SGN1	3996600	2435500	3314800	NA	NA	NA
Total_exclusive	BET3	3606200	10455000	10359000	NA	NA	NA
Total_exclusive	PDR1	653800	74950	317150	NA	NA	NA
Total_exclusive	TPS3	1328000	0	133320	NA	NA	NA
Total_exclusive	YPL225W	0	1058000	2474300	NA	NA	NA
Total_exclusive	TAT1	713150	1350500	279280	NA	NA	NA
Total_exclusive	SAL1	155390	172390	279620	NA	NA	NA
Total_exclusive	AVT7	3912700	28434000	5340300	NA	NA	NA
Total_exclusive	RGR1	328630	300090	393300	NA	NA	NA
Total_exclusive	IRC20	130290	19906000	57156	NA	NA	NA
Total_exclusive	COF1	8514700	0	10712000	NA	NA	NA
Total_exclusive	RAD3	997400	0	108370	NA	NA	NA
Total_exclusive	CWH43	2665500	0	5461200	NA	NA	NA
Total_exclusive	PET127	205420	102170	257480	NA	NA	NA
Total_exclusive	TOD6	481300	0	221780	NA	NA	NA
Total_exclusive	FUI1	229830	0	389430	NA	NA	NA
Total_exclusive	ALT2	0	37078	490230	NA	NA	NA
Total_exclusive	MET13	1225500	380010	66827	NA	NA	NA
Total_exclusive	FCF2	1037100	0	1247700	NA	NA	NA
Total_exclusive	HTS1	48914000	235540	0	NA	NA	NA
Total_exclusive	DLD1	446330	0	2116500	NA	NA	NA
Total_exclusive	GEF1	0	276290	320800	NA	NA	NA
Total_exclusive	UGO1	1837300	402110	514130	NA	NA	NA
Total_exclusive	PAM17	2282800	6984200	10127000	NA	NA	NA
Total_exclusive	VPS33	1028300	0	1186900	NA	NA	NA
Total_exclusive	OCH1	818660	0	6938400	NA	NA	NA
Total_exclusive	LSO2	0	38199000	51077000	NA	NA	NA
Total_exclusive	RSM25	2272600	2101700	2466700	NA	NA	NA
Total_exclusive	SHO1	2257400	1567600	1342600	NA	NA	NA
Total_exclusive	COQ6	1300000	0	524430	NA	NA	NA
Total_exclusive	MRPL25	8840200	979100	3132700	NA	NA	NA
Total_exclusive	NUT1	392090	103030	211310	NA	NA	NA
Total_exclusive	TRS130	507160	0	118660	NA	NA	NA
Total_exclusive	CYC3	0	2013900	5932300	NA	NA	NA
Total_exclusive	RTT10	140450	0	206710	NA	NA	NA
Total_exclusive	LSM12	1434000	693740	0	NA	NA	NA
Total_exclusive	CBP6	842580	2222200	3499100	NA	NA	NA
Total_exclusive	ATP17	18014000	28281000	32171000	NA	NA	NA
Total_exclusive	LEU4	928410	0	128470	NA	NA	NA
Total_exclusive	RNQ1	0	7103200	7855100	NA	NA	NA
Total_exclusive	QDR3	0	430460	461230	NA	NA	NA
Total_exclusive	COQ9	2963300	2500400	1315600	NA	NA	NA
Total_exclusive	SGT2	0	664910	2729600	NA	NA	NA
Total_exclusive	PIC2	7023100	9815800	2455300	NA	NA	NA
Total_exclusive	ALD5	826010	490960	418040	NA	NA	NA
Total_exclusive	VCX1	4651200	0	10202000	NA	NA	NA
Total_exclusive	TUP1	822570	31933000	0	NA	NA	NA
Total_exclusive	RFA2	0	866460	2294000	NA	NA	NA
Total_exclusive	YGR122W	0	132000	2086000	NA	NA	NA
Total_exclusive	BNA4	1270300	0	913810	NA	NA	NA
Total_exclusive	ECM1	0	7376800	3731900	NA	NA	NA
Total_exclusive	GPI8	2530000	0	150780	NA	NA	NA
Total_exclusive	DSL1	490940	0	351510	NA	NA	NA
Total_exclusive	FCF1	1351500	4541900	0	NA	NA	NA
Total_exclusive	ERV29	4457300	7029500	0	NA	NA	NA
Total_exclusive	NHP6B	1555600	0	11886000	NA	NA	NA
Total_exclusive	PHO81	684630	123230	396930	NA	NA	NA
Total_exclusive	GDH2	1026300	0	820810	NA	NA	NA
Total_exclusive	RSM22	159490	0	637750	NA	NA	NA
Total_exclusive	GYP8	752620	0	182450	NA	NA	NA
Total_exclusive	PIS1	11189000	3522800	11665000	NA	NA	NA
Total_exclusive	KDX1	0	1084600	2304200	NA	NA	NA
Total_exclusive	LAP3	2530300	39751000	0	NA	NA	NA
Total_exclusive	RPA34	3076600	3036500	2292100	NA	NA	NA
Total_exclusive	OST3	808550	0	13355000	NA	NA	NA
Total_exclusive	SOD1	707980	5606300	2669000	NA	NA	NA
Total_exclusive	RCF1	11711000	0	15625000	NA	NA	NA
Total_exclusive	TOP1	724940	85833	0	NA	NA	NA
Total_exclusive	PSY2	0	707080	438550	NA	NA	NA
Total_exclusive	CYC1	0	8328600	8787100	NA	NA	NA
Total_exclusive	LAC1	3839400	2505900	0	NA	NA	NA
Total_exclusive	SNF4	959670	1062400	0	NA	NA	NA
Total_exclusive	KIC1	951480	0	137010	NA	NA	NA
Total_exclusive	SKP1	1269700	0	963740	NA	NA	NA
Total_exclusive	BUD7	657060	116650	0	NA	NA	NA
Total_exclusive	UBC6	0	3782600	2188700	NA	NA	NA
Total_exclusive	MRPS8	2917900	0	4500600	NA	NA	NA
Total_exclusive	RSC30	16937	1360300	0	NA	NA	NA
Total_exclusive	IRA1	288710	29796	25466	NA	NA	NA
Total_exclusive	PET8	1060800	402290	459550	NA	NA	NA
Total_exclusive	EMC5	880790	0	26328000	NA	NA	NA
Total_exclusive	ARP5	386940	369420	0	NA	NA	NA
Total_exclusive	VID22	175220	0	373840	NA	NA	NA
Total_exclusive	YGR125W	671010	0	1338200	NA	NA	NA
Total_exclusive	PRP22	0	75736	634840	NA	NA	NA
Total_exclusive	SRM1	633690	70586	0	NA	NA	NA
Total_exclusive	YGR130C	196230	0	85748	NA	NA	NA
Total_exclusive	AHA1	0	343500	211680	NA	NA	NA
Total_exclusive	VOA1	4729800	11293000	33518000	NA	NA	NA
Total_exclusive	COX9	33691000	0	97595000	NA	NA	NA
Total_exclusive	RNT1	392680	0	131120	NA	NA	NA
Total_exclusive	YPK3	475300	0	546280	NA	NA	NA
Total_exclusive	ECM32	0	98298	175890	NA	NA	NA
Total_exclusive	NUP159	212560	0	429550	NA	NA	NA
Total_exclusive	MRPL51	2115700	4416700	6133800	NA	NA	NA
Total_exclusive	LEM3	468370	0	10158000	NA	NA	NA
Total_exclusive	AIM24	1340000	0	397620	NA	NA	NA
Total_exclusive	CTR1	0	577580	602920	NA	NA	NA
Total_exclusive	ZPR1	0	83142	898500	NA	NA	NA
Total_exclusive	ALO1	389000	0	1334600	NA	NA	NA
Total_exclusive	DHH1	322920	430150	1115900	NA	NA	NA
Total_exclusive	EXO70	0	804370	465660	NA	NA	NA
Total_exclusive	RPC11	6854700	5358700	0	NA	NA	NA
Total_exclusive	MRX1	262550	136620	0	NA	NA	NA
Total_exclusive	SUR7	2725700	4266700	0	NA	NA	NA
Total_exclusive	VTC1	9175200	0	35502000	NA	NA	NA
Total_exclusive	NRP1	1034700	746990	2427200	NA	NA	NA
Total_exclusive	YMR099C	0	842290	401360	NA	NA	NA
Total_exclusive	SVP26	2849500	1608900	20478000	NA	NA	NA
Total_exclusive	MAM3	2171900	1153000	0	NA	NA	NA
Total_exclusive	SWP1	4967400	0	28119000	NA	NA	NA
Total_exclusive	ARO9	929590	1358300	1067600	NA	NA	NA
Total_exclusive	RAM2	1251700	105120	0	NA	NA	NA
Total_exclusive	ARG4	821510	238140	0	NA	NA	NA
Total_exclusive	SHB17	3368400	0	1253500	NA	NA	NA
Total_exclusive	YNL193W	943190	191860	0	NA	NA	NA
Total_exclusive	MMS1	309330	24473	138060	NA	NA	NA
Total_exclusive	MNR2	193860	0	2951500	NA	NA	NA
Total_exclusive	PGA2	2347100	0	1948200	NA	NA	NA
Total_exclusive	MED1	313400	0	241320	NA	NA	NA
Total_exclusive	AIM6	394010	0	2355200	NA	NA	NA
Total_exclusive	INA17	337780	0	223950	NA	NA	NA
Total_exclusive	HSH49	173140	0	2691800	NA	NA	NA
Total_exclusive	AIM36	0	1423400	1272400	NA	NA	NA
Total_exclusive	ISW2	334310	0	344670	NA	NA	NA
Total_exclusive	RSC58	571310	0	319920	NA	NA	NA
Total_exclusive	FOL2	3000300	0	272520	NA	NA	NA
Total_exclusive	GNT1	391840	0	563230	NA	NA	NA
Total_exclusive	PRP6	69030	0	175430	NA	NA	NA
Total_exclusive	QNS1	276760	427310	166390	NA	NA	NA
Total_exclusive	RTP1	26651	0	465190	NA	NA	NA
Total_exclusive	PRS4	3583500	831840	1356900	NA	NA	NA
Total_exclusive	RRM3	0	173190	162440	NA	NA	NA
Total_exclusive	MRPS12	2705700	2123100	812910	NA	NA	NA
Total_exclusive	DPH1	508010	0	791480	NA	NA	NA
Total_exclusive	HRB1	932840	655180	0	NA	NA	NA
Total_exclusive	ADR1	229720	85485	175670	NA	NA	NA
Total_exclusive	RTT101	355090	138010	0	NA	NA	NA
Total_exclusive	ERV2	0	4446400	1078900	NA	NA	NA
Total_exclusive	ATP7	0	1668300	7799000	NA	NA	NA
Total_exclusive	CDC42	0	5179100	7256500	NA	NA	NA
Total_exclusive	MRPL31	819000	4480800	4011100	NA	NA	NA
Total_exclusive	MDV1	463340	467520	0	NA	NA	NA
Total_exclusive	GAB1	10703000	0	18611000	NA	NA	NA
Total_exclusive	MDJ2	1701300	920910	4772900	NA	NA	NA
Total_exclusive	ABF2	0	5586000	16222000	NA	NA	NA
Total_exclusive	WWM1	0	1583800	561160	NA	NA	NA
Total_exclusive	ISW1	118440	0	250510	NA	NA	NA
Total_exclusive	MTF2	0	353460	467870	NA	NA	NA
Total_exclusive	GRX2	0	730040	1642600	NA	NA	NA
Total_exclusive	MRPL32	0	5272000	3876900	NA	NA	NA
Total_exclusive	COG1	505410	0	70118	NA	NA	NA
Total_exclusive	RPB11	1691600	2896000	1321900	NA	NA	NA
Total_exclusive	MGR3	218100	0	465090	NA	NA	NA
Total_exclusive	DID2	0	913220	3453300	NA	NA	NA
Total_exclusive	SDH2	0	1694900	3381200	NA	NA	NA
Total_exclusive	CBP4	0	1079900	2008800	NA	NA	NA
Total_exclusive	RPC37	0	873790	1932500	NA	NA	NA
Total_exclusive	NHP10	0	515920	930480	NA	NA	NA
Total_exclusive	SUM1	0	83097	148110	NA	NA	NA
Total_exclusive	REB1	0	86339	138980	NA	NA	NA
Total_exclusive	NCS2	0	301550	355640	NA	NA	NA
Total_exclusive	RGD2	133270	0	68881	NA	NA	NA
Total_exclusive	RSM19	0	3218100	5182200	NA	NA	NA
Detected_in_both	RPL3	5366100000	2761600000	2231100000	6969400000	5764300000	4659900000
Detected_in_both	ASC1	8725000000	6027600000	6004800000	8805600000	5523000000	6499700000
Detected_in_both	RPS1B	9237300000	8419000000	9136800000	11037000000	17117000000	10770000000
Detected_in_both	RPL8B	8077100000	6354000000	6504500000	4683900000	6395900000	9886400000
Detected_in_both	RPL4A	11673000000	10751000000	10803000000	19162000000	13932000000	14276000000
Detected_in_both	RPL5	9375800000	5483300000	4955800000	9403800000	4086100000	6615400000
Detected_in_both	RPP0	7504100000	11586000000	13782000000	11272000000	7536500000	13399000000
Detected_in_both	RPS4A	7060600000	4349200000	3878400000	8291200000	8511000000	7648800000
Detected_in_both	RPS3	11099000000	9475900000	10044000000	17360000000	17468000000	18030000000
Detected_in_both	RPL2B	7961400000	7579900000	6588600000	9612200000	6298000000	11534000000
Detected_in_both	RPS8B	10453000000	7960600000	7108800000	12396000000	9067700000	12613000000
Detected_in_both	FAS1	416490000	221100000	259730000	960150000	104330000	54297000
Detected_in_both	TEF1	4388000000	3462700000	3657700000	5360400000	3724600000	3761000000
Detected_in_both	FAS2	389870000	167230000	187210000	653780000	44477000	14751000
Detected_in_both	PMA1	1282800000	1560200000	1984000000	2062400000	1402100000	961500000
Detected_in_both	RPL9A	8164300000	4025200000	4645200000	11821000000	6074200000	7980900000
Detected_in_both	RPL12A	4091200000	7977400000	9724300000	2417100000	5700900000	1974600000
Detected_in_both	RPS18A	6478800000	12687000000	12996000000	3410900000	9947800000	8784000000
Detected_in_both	RPS5	10138000000	11694000000	6814600000	10871000000	17922000000	11972000000
Detected_in_both	RPL1A	4916100000	5163000000	4202800000	3039400000	4030800000	3828100000
Detected_in_both	RPL7A	9456700000	9613500000	8904800000	12865000000	10198000000	15040000000
Detected_in_both	RPL23A	3992000000	5865000000	5459000000	2193600000	2117000000	2613200000
Detected_in_both	CDC19	2162200000	1185400000	1262400000	4401200000	2361300000	1219500000
Detected_in_both	RPS14B	6883300000	7390300000	6890100000	10241000000	14961000000	7176800000
Detected_in_both	RPS22A	7498600000	4010900000	4214000000	1941700000	3708800000	2451300000
Detected_in_both	TDH3	1274100000	1186700000	1055900000	469800000	1340100000	677740000
Detected_in_both	RPL10	4811800000	3616700000	2466800000	3793100000	5149200000	6901800000
Detected_in_both	URA2	174230000	95480000	108450000	360450000	30082000	2392500
Detected_in_both	PDC1	915940000	1024200000	1018300000	891250000	1511200000	659990000
Detected_in_both	EFT1	414660000	287570000	306730000	165990000	72765000	26318000
Detected_in_both	NAM7	97840000	92084000	88071000	4377700000	3691900000	3452400000
Detected_in_both	SSB1	1372400000	998650000	1410100000	771160000	678150000	285670000
Detected_in_both	RPL17A	11247000000	8960100000	9556700000	7223900000	15554000000	13153000000
Detected_in_both	DED1	506300000	541410000	647430000	241920000	307540000	230060000
Detected_in_both	RPS2	4527800000	3832200000	3573400000	1753400000	5810200000	5305700000
Detected_in_both	YHR020W	543830000	754130000	684750000	833430000	756470000	338760000
Detected_in_both	RPS7A	5355000000	4371400000	4747500000	3068300000	4240300000	4542700000
Detected_in_both	RPS24A	6648600000	5701000000	5753200000	4995000000	6810500000	8985900000
Detected_in_both	YEF3	480820000	218560000	250790000	1058700000	131110000	40928000
Detected_in_both	RPL18A	4812600000	4696300000	3004200000	8511100000	2679900000	11807000000
Detected_in_both	RPS12	5870500000	8663600000	6717400000	102530000	3706400000	4067500000
Detected_in_both	RPL20B	11924000000	9435000000	9190100000	14891000000	20082000000	13642000000
Detected_in_both	RPL14B	4865200000	3820400000	3887400000	4267600000	3728900000	4765800000
Detected_in_both	RPL24A	6257800000	4164200000	3835000000	8241700000	2279200000	3035300000
Detected_in_both	RPL11A	7643600000	9006100000	7548800000	13437000000	8517000000	9936200000
Detected_in_both	SAM1	591710000	534060000	523070000	1777200000	1360900000	857830000
Detected_in_both	RPL16B	4374300000	4428800000	4027900000	4343900000	4457500000	7748000000
Detected_in_both	RPS19A	993550000	5469300000	5391200000	1447200000	5639700000	2175600000
Detected_in_both	ARO1	165020000	85389000	132850000	242090000	2349100	3680700
Detected_in_both	RPS23B	3160100000	2177400000	2084400000	1976600000	525310000	1876400000
Detected_in_both	RPS9B	6147500000	5036600000	5332500000	5684600000	4279300000	7331100000
Detected_in_both	RPL6A	11155000000	7293500000	7621300000	12577000000	11306000000	12545000000
Detected_in_both	RPL6B	10167000000	6790700000	6939200000	12542000000	9206100000	11787000000
Detected_in_both	RPL25	8537000000	9078900000	8732400000	13131000000	7888300000	11707000000
Detected_in_both	NOP1	533340000	408460000	440640000	144070000	235090000	154800000
Detected_in_both	VMA2	454890000	365980000	409060000	776970000	343190000	173250000
Detected_in_both	KAP123	209720000	219850000	262670000	455620000	151800000	158650000
Detected_in_both	RPS31	3081200000	1694900000	1940600000	3649000000	1405000000	2341100000
Detected_in_both	RPS6B	7973800000	10769000000	9236800000	12822000000	17654000000	13649000000
Detected_in_both	RPS16B	6243500000	6871600000	6864800000	5058100000	6456600000	5222700000
Detected_in_both	RPL15A	7687800000	7794500000	6487700000	12153000000	9243500000	12572000000
Detected_in_both	RPL13B	6356600000	6395000000	5529100000	6872100000	5064700000	8777400000
Detected_in_both	RPS15	1883500000	3051200000	2602100000	1112900000	5574900000	2783200000
Detected_in_both	RPL16A	3629800000	3261600000	3094700000	2879100000	3228000000	5634000000
Detected_in_both	RPS20	5974200000	9767300000	7429900000	7372900000	8028300000	8855000000
Detected_in_both	LEU2	543290000	287830000	184560000	583410000	896130000	82099000
Detected_in_both	RPL28	7228200000	12093000000	12858000000	3208500000	10162000000	6026300000
Detected_in_both	RPL27A	13900000000	9512600000	12247000000	9613200000	9049200000	13239000000
Detected_in_both	RPL21A	6609900000	6976300000	5531300000	1872800000	3776800000	6592800000
Detected_in_both	RPL30	4717600000	3496200000	3893200000	3051100000	3394900000	2423500000
Detected_in_both	RPL26B	6201300000	7840400000	5027600000	6577500000	6346200000	9006700000
Detected_in_both	ENO2	370310000	297660000	330850000	77626000	150770000	40457000
Detected_in_both	RPS17A	14889000000	14710000000	16400000000	7145800000	13414000000	12433000000
Detected_in_both	GFA1	204670000	112900000	117560000	153190000	59975000	14794000
Detected_in_both	RPL19B	11238000000	9728500000	9605300000	12355000000	14373000000	14293000000
Detected_in_both	RPL36B	2467800000	6420800000	6030800000	818300000	5510100000	3250200000
Detected_in_both	RPS25B	1064300000	3000100000	1634600000	0	6024900000	2051800000
Detected_in_both	MES1	159700000	110600000	154530000	100320000	25751000	0
Detected_in_both	RPS11B	9630600000	9082200000	7400800000	10245000000	11434000000	13111000000
Detected_in_both	GUS1	143560000	172390000	153110000	123360000	64220000	0
Detected_in_both	RPS13	9998400000	9661100000	11727000000	4353900000	10518000000	15754000000
Detected_in_both	VMA1	108580000	83661000	99485000	86333000	6374200	0
Detected_in_both	LEU1	182850000	115820000	91342000	1417000000	597780000	316190000
Detected_in_both	ILV2	337720000	242780000	252060000	614520000	405790000	120680000
Detected_in_both	YHB1	642020000	327400000	431870000	444250000	244780000	56771000
Detected_in_both	HSC82	377260000	129040000	163500000	665070000	32669000	0
Detected_in_both	RPL32	4796100000	3835400000	3407000000	983900000	952450000	1000400000
Detected_in_both	APA1	685190000	633850000	860530000	0	356050000	278740000
Detected_in_both	NOP56	219920000	259230000	284630000	53939000	76416000	18253000
Detected_in_both	NOG1	169770000	128110000	137650000	105410000	56494000	0
Detected_in_both	MAE1	140730000	119890000	118220000	539680000	23515000	15195000
Detected_in_both	OLA1	313860000	293080000	308180000	35143000	136450000	21595000
Detected_in_both	ATP2	454760000	286500000	322820000	612370000	307130000	228200000
Detected_in_both	MIR1	668270000	680030000	797530000	138130000	1241900000	450920000
Detected_in_both	RPL35B	3548700000	8891800000	9134200000	3254800000	9705500000	4636800000
Detected_in_both	ATP1	305030000	312190000	290910000	470260000	200010000	176540000
Detected_in_both	RPS28A	4683900000	4885700000	5386700000	684930000	1011700000	272130000
Detected_in_both	PET9	350630000	317840000	310500000	114420000	187510000	188260000
Detected_in_both	ACT1	127390000	96151000	231310000	410290000	45081000	235510000
Detected_in_both	RPL33A	5802300000	4803500000	5292900000	4376900000	3053100000	4614300000
Detected_in_both	CCT8	110490000	68794000	81773000	28431000	15314000	0
Detected_in_both	ADH1	687570000	393870000	403860000	829410000	793450000	280940000
Detected_in_both	TEF4	346360000	402120000	339430000	326930000	393810000	121340000
Detected_in_both	LAT1	224780000	216260000	265830000	362280000	500000000	185340000
Detected_in_both	MRT4	268850000	238730000	181610000	0	332120000	60944000
Detected_in_both	CCT4	106620000	54102000	79806000	37600000	40822000	0
Detected_in_both	ENP1	55286000	69579000	77718000	73853000	40615000	0
Detected_in_both	TUB2	255370000	175970000	209310000	70998000	30930000	42144000
Detected_in_both	PSA1	229290000	110190000	86408000	144490000	66224000	0
Detected_in_both	TUB1	120980000	72568000	125190000	37973000	65951000	0
Detected_in_both	RPL34B	2182400000	3354100000	3170100000	2148500000	1686800000	3102700000
Detected_in_both	RPS27A	11015000000	13166000000	14093000000	4684300000	0	5575600000
Detected_in_both	YHM2	124180000	214910000	213270000	0	288300000	88686000
Detected_in_both	HHF1	767900000	1582300000	1473900000	300150000	1476500000	1268200000
Detected_in_both	OAC1	248910000	236840000	194690000	35055000	251250000	0
Detected_in_both	TIF6	625950000	482330000	583570000	0	447590000	308200000
Detected_in_both	RPL39	4294400000	5391500000	7720900000	1062900000	6741100000	1704000000

## Sheet: 6XHis-UPF1
Detection	Protein	Total	IP
Total_exclusive	MDN1	18113000	NA
Total_exclusive	TY1B-LR2	141360000	NA
Total_exclusive	SSA2	876330000	NA
Total_exclusive	TDH3	1424800000	NA
Total_exclusive	YEF3	330990000	NA
Total_exclusive	RPS14B	4410200000	NA
Total_exclusive	RPS18A	11029000000	NA
Total_exclusive	RPS0B	11907000000	NA
Total_exclusive	HSC82	350350000	NA
Total_exclusive	ENO2	311180000	NA
Total_exclusive	RPL9A	5566600000	NA
Total_exclusive	PDR5	70264000	NA
Total_exclusive	YDJ1	552030000	NA
Total_exclusive	RPA190	26600000	NA
Total_exclusive	CDC39	12866000	NA
Total_exclusive	RPS7B	4188700000	NA
Total_exclusive	YHB1	492280000	NA
Total_exclusive	RPA135	32285000	NA
Total_exclusive	GLT1	179460000	NA
Total_exclusive	COP1	37863000	NA
Total_exclusive	CRM1	66677000	NA
Total_exclusive	DBP2	172680000	NA
Total_exclusive	NIP1	95158000	NA
Total_exclusive	CHC1	19215000	NA
Total_exclusive	MET10	45803000	NA
Total_exclusive	CCT8	164990000	NA
Total_exclusive	SEC7	13101000	NA
Total_exclusive	MAE1	89851000	NA
Total_exclusive	RPL7A	8330400000	NA
Total_exclusive	RPS7A	6018600000	NA
Total_exclusive	PRT1	79186000	NA
Total_exclusive	MYO2	10399000	NA
Total_exclusive	RPS15	2459200000	NA
Total_exclusive	VPH1	94808000	NA
Total_exclusive	RRP5	11372000	NA
Total_exclusive	ERB1	152650000	NA
Total_exclusive	CBF5	205650000	NA
Total_exclusive	DUR1	15460000	NA
Total_exclusive	RPL38	4585400000	NA
Total_exclusive	NOP7	144270000	NA
Total_exclusive	PGK1	173970000	NA
Total_exclusive	UTP22	17138000	NA
Total_exclusive	DBP3	110530000	NA
Total_exclusive	ECM29	9028900	NA
Total_exclusive	SRO9	182050000	NA
Total_exclusive	URB1	8908500	NA
Total_exclusive	RPL43B	2297700000	NA
Total_exclusive	KRE33	24943000	NA
Total_exclusive	RPB2	17713000	NA
Total_exclusive	HXT3	21170000	NA
Total_exclusive	SKI3	10584000	NA
Total_exclusive	RPT3	112230000	NA
Total_exclusive	NUP192	11606000	NA
Total_exclusive	DOP1	8663500	NA
Total_exclusive	ACT1	143250000	NA
Total_exclusive	RPS21B	1363100000	NA
Total_exclusive	RPL36A	3333200000	NA
Total_exclusive	TRM3	10845000	NA
Total_exclusive	NAN1	59249000	NA
Total_exclusive	RPL13B	6441600000	NA
Total_exclusive	ARX1	107710000	NA
Total_exclusive	SRP72	85926000	NA
Total_exclusive	RPS12	5873500000	NA
Total_exclusive	YTM1	129210000	NA
Total_exclusive	SEC63	59448000	NA
Total_exclusive	STM1	1210700000	NA
Total_exclusive	NEW1	16108000	NA
Total_exclusive	MET5	10648000	NA
Total_exclusive	YDR341C	27830000	NA
Total_exclusive	FAA4	95256000	NA
Total_exclusive	SEC26	50139000	NA
Total_exclusive	NOG2	70281000	NA
Total_exclusive	MRT4	350680000	NA
Total_exclusive	POL5	22327000	NA
Total_exclusive	PSE1	35176000	NA
Total_exclusive	RPL22A	3830500000	NA
Total_exclusive	RPT5	57594000	NA
Total_exclusive	TCP1	61147000	NA
Total_exclusive	RPS23B	1635200000	NA
Total_exclusive	SDA1	49311000	NA
Total_exclusive	KAP95	94134000	NA
Total_exclusive	RPS31	2336000000	NA
Total_exclusive	PET9	221900000	NA
Total_exclusive	TIF34	151830000	NA
Total_exclusive	NUM1	12816000	NA
Total_exclusive	SEC27	41833000	NA
Total_exclusive	NUP170	8389500	NA
Total_exclusive	KAR2	143360000	NA
Total_exclusive	TOP2	8685300	NA
Total_exclusive	MIS1	22962000	NA
Total_exclusive	IKI3	12505000	NA
Total_exclusive	CCT5	58776000	NA
Total_exclusive	SSC1	63691000	NA
Total_exclusive	SAC1	31312000	NA
Total_exclusive	KRS1	47540000	NA
Total_exclusive	ILV5	133720000	NA
Total_exclusive	TCB1	18055000	NA
Total_exclusive	GCD6	39625000	NA
Total_exclusive	NMD3	134330000	NA
Total_exclusive	RPO31	5679600	NA
Total_exclusive	POR1	675230000	NA
Total_exclusive	RPS20	7137400000	NA
Total_exclusive	RPN3	32357000	NA
Total_exclusive	TOM70	49602000	NA
Total_exclusive	OLE1	79012000	NA
Total_exclusive	LCB1	46502000	NA
Total_exclusive	HAS1	68370000	NA
Total_exclusive	MSS116	37765000	NA
Total_exclusive	PDA1	147720000	NA
Total_exclusive	SEC21	30185000	NA
Total_exclusive	RPS28A	3473700000	NA
Total_exclusive	ADE3	26776000	NA
Total_exclusive	RPL15A	8099100000	NA
Total_exclusive	CSE1	20036000	NA
Total_exclusive	PAB1	64172000	NA
Total_exclusive	NAT1	14027000	NA
Total_exclusive	SKI2	6491400	NA
Total_exclusive	NCL1	20492000	NA
Total_exclusive	CCT2	30667000	NA
Total_exclusive	TUB3	131920000	NA
Total_exclusive	NMD5	18113000	NA
Total_exclusive	MCM5	17106000	NA
Total_exclusive	GCD1	39090000	NA
Total_exclusive	FAA1	32372000	NA
Total_exclusive	FUN12	23768000	NA
Total_exclusive	ILS1	8676700	NA
Total_exclusive	STT4	4973700	NA
Total_exclusive	MAK21	27758000	NA
Total_exclusive	NOP4	41253000	NA
Total_exclusive	CYS4	29692000	NA
Total_exclusive	MIC60	39281000	NA
Total_exclusive	CPA2	21367000	NA
Total_exclusive	RBG1	105400000	NA
Total_exclusive	AFG2	18177000	NA
Total_exclusive	NUP188	10070000	NA
Total_exclusive	GDH1	43971000	NA
Total_exclusive	GCD2	47948000	NA
Total_exclusive	SUP45	46476000	NA
Total_exclusive	RVB2	48121000	NA
Total_exclusive	NUP133	9462600	NA
Total_exclusive	UTP15	38057000	NA
Total_exclusive	RPS16B	4291400000	NA
Total_exclusive	URB2	8164400	NA
Total_exclusive	RNA1	94720000	NA
Total_exclusive	RPT1	39791000	NA
Total_exclusive	MCM6	10451000	NA
Total_exclusive	LPD1	24683000	NA
Total_exclusive	ALA1	77270000	NA
Total_exclusive	ALD6	32188000	NA
Total_exclusive	MCM4	10786000	NA
Total_exclusive	NOC2	22064000	NA
Total_exclusive	TRA1	856540	NA
Total_exclusive	MET6	13264000	NA
Total_exclusive	MSN5	6499900	NA
Total_exclusive	ARB1	56787000	NA
Total_exclusive	VAS1	10424000	NA
Total_exclusive	GEA2	5146400	NA
Total_exclusive	CIC1	96007000	NA
Total_exclusive	SAS10	22891000	NA
Total_exclusive	UTP8	46612000	NA
Total_exclusive	NOP12	51868000	NA
Total_exclusive	RPT4	75959000	NA
Total_exclusive	GPM1	446170000	NA
Total_exclusive	NUP157	5888200	NA
Total_exclusive	BMS1	10296000	NA
Total_exclusive	RIX1	14159000	NA
Total_exclusive	RKR1	5866700	NA
Total_exclusive	ACO2	23709000	NA
Total_exclusive	UTP4	13507000	NA
Total_exclusive	AAP1	10151000	NA
Total_exclusive	DLD3	58605000	NA
Total_exclusive	SCP160	6970400	NA
Total_exclusive	XRN1	5206100	NA
Total_exclusive	PDB1	435240000	NA
Total_exclusive	MET3	59320000	NA
Total_exclusive	MPP10	21392000	NA
Total_exclusive	LYS4	12429000	NA
Total_exclusive	VMA6	137470000	NA
Total_exclusive	TCB2	9700400	NA
Total_exclusive	MET18	7398900	NA
Total_exclusive	RIX7	18840000	NA
Total_exclusive	MON2	2542200	NA
Total_exclusive	TRM1	39867000	NA
Total_exclusive	SPB1	24803000	NA
Total_exclusive	NOP9	16842000	NA
Total_exclusive	COR1	33335000	NA
Total_exclusive	HYP2	296010000	NA
Total_exclusive	RPL31A	6962900000	NA
Total_exclusive	NOP2	45227000	NA
Total_exclusive	PHO84	95865000	NA
Total_exclusive	RRB1	60494000	NA
Total_exclusive	BCP1	63735000	NA
Total_exclusive	RPL33A	5383600000	NA
Total_exclusive	SSE1	22901000	NA
Total_exclusive	PWP2	13731000	NA
Total_exclusive	MAK5	14410000	NA
Total_exclusive	TIF4631	15298000	NA
Total_exclusive	ACS2	31788000	NA
Total_exclusive	CHO2	13768000	NA
Total_exclusive	MCX1	21336000	NA
Total_exclusive	TIF1	48644000	NA
Total_exclusive	ARO8	31706000	NA
Total_exclusive	ERG27	57664000	NA
Total_exclusive	LOS1	7819500	NA
Total_exclusive	SSZ1	19048000	NA
Total_exclusive	RMT2	45511000	NA
Total_exclusive	SEC13	72844000	NA
Total_exclusive	CEX1	13713000	NA
Total_exclusive	REP1	31265000	NA
Total_exclusive	ILV1	17791000	NA
Total_exclusive	RIA1	3452100	NA
Total_exclusive	HCA4	20684000	NA
Total_exclusive	NUP120	6308400	NA
Total_exclusive	EBP2	46931000	NA
Total_exclusive	GCD7	50223000	NA
Total_exclusive	RPN7	23978000	NA
Total_exclusive	RET1	8268400	NA
Total_exclusive	NSR1	125620000	NA
Total_exclusive	NSA1	22402000	NA
Total_exclusive	FBA1	114640000	NA
Total_exclusive	RPC40	75480000	NA
Total_exclusive	GCN3	60902000	NA
Total_exclusive	RNR1	12929000	NA
Total_exclusive	UTP6	9978800	NA
Total_exclusive	RSM23	14593000	NA
Total_exclusive	LCB2	50884000	NA
Total_exclusive	MCM2	6896800	NA
Total_exclusive	BEM2	1458500	NA
Total_exclusive	UBP3	9232300	NA
Total_exclusive	LAA1	2055700	NA
Total_exclusive	KAP104	24912000	NA
Total_exclusive	TCB3	6125800	NA
Total_exclusive	PGA3	50264000	NA
Total_exclusive	ERG13	45504000	NA
Total_exclusive	RRP3	22461000	NA
Total_exclusive	UTP9	19073000	NA
Total_exclusive	UTP21	10806000	NA
Total_exclusive	RLI1	18600000	NA
Total_exclusive	KAP120	5987100	NA
Total_exclusive	BRX1	106950000	NA
Total_exclusive	MCM7	7098300	NA
Total_exclusive	ETT1	85765000	NA
Total_exclusive	TOM1	1070600	NA
Total_exclusive	UFD4	3032300	NA
Total_exclusive	RPN9	17037000	NA
Total_exclusive	DED81	19968000	NA
Total_exclusive	PWP1	31533000	NA
Total_exclusive	EGD2	182170000	NA
Total_exclusive	ERG11	20417000	NA
Total_exclusive	PGI1	21185000	NA
Total_exclusive	KRI1	25010000	NA
Total_exclusive	LSG1	13634000	NA
Total_exclusive	NOP13	14946000	NA
Total_exclusive	TIF35	45732000	NA
Total_exclusive	MCM3	8011600	NA
Total_exclusive	DBP9	15931000	NA
Total_exclusive	SGD1	6554200	NA
Total_exclusive	PUS1	14832000	NA
Total_exclusive	QCR2	34513000	NA
Total_exclusive	RPF1	62730000	NA
Total_exclusive	NOC3	16047000	NA
Total_exclusive	CDC60	3228200	NA
Total_exclusive	MSS51	12526000	NA
Total_exclusive	PDS5	2202300	NA
Total_exclusive	GNP1	21460000	NA
Total_exclusive	GSF2	35969000	NA
Total_exclusive	SYO1	37400000	NA
Total_exclusive	SNQ2	6051100	NA
Total_exclusive	YCF1	9251400	NA
Total_exclusive	NUP85	7735600	NA
Total_exclusive	PRS5	18469000	NA
Total_exclusive	PYC2	6981100	NA
Total_exclusive	ELP3	39225000	NA
Total_exclusive	ARC1	55132000	NA
Total_exclusive	PUF6	18951000	NA
Total_exclusive	FPR4	158480000	NA
Total_exclusive	TRM5	15560000	NA
Total_exclusive	SHM1	22336000	NA
Total_exclusive	SEC23	7008800	NA
Total_exclusive	APL5	4279800	NA
Total_exclusive	AAT1	11228000	NA
Total_exclusive	TRM732	2743300	NA
Total_exclusive	TMA46	71975000	NA
Total_exclusive	DPL1	8313600	NA
Total_exclusive	RPC82	13130000	NA
Total_exclusive	IST2	12300000	NA
Total_exclusive	NOP16	82170000	NA
Total_exclusive	RLP7	215440000	NA
Total_exclusive	PHB1	35919000	NA
Total_exclusive	SPB4	8166900	NA
Total_exclusive	BLM10	941310	NA
Total_exclusive	SEC3	1961100	NA
Total_exclusive	AAH1	47623000	NA
Total_exclusive	USO1	748920	NA
Total_exclusive	ERG26	62642000	NA
Total_exclusive	IPI3	18023000	NA
Total_exclusive	WBP1	51010000	NA
Total_exclusive	PRP43	4611100	NA
Total_exclusive	HOM2	29077000	NA
Total_exclusive	BMH1	29870000	NA
Total_exclusive	RSC8	11322000	NA
Total_exclusive	SCL1	8524600	NA
Total_exclusive	EMW1	5803000	NA
Total_exclusive	TRP2	14794000	NA
Total_exclusive	YOL098C	8086800	NA
Total_exclusive	NIC96	5487600	NA
Total_exclusive	RPL22B	994850000	NA
Total_exclusive	SEC10	4035500	NA
Total_exclusive	BFR2	11526000	NA
Total_exclusive	STH1	2726700	NA
Total_exclusive	SFB2	5151900	NA
Total_exclusive	DIP2	8096600	NA
Total_exclusive	MRP7	13564000	NA
Total_exclusive	TIF6	821990000	NA
Total_exclusive	MSH2	7518000	NA
Total_exclusive	KAP122	5408700	NA
Total_exclusive	POL3	2956800	NA
Total_exclusive	TSR1	8041300	NA
Total_exclusive	TPI1	75656000	NA
Total_exclusive	DPM1	50824000	NA
Total_exclusive	PDX1	20809000	NA
Total_exclusive	VPS1	4438200	NA
Total_exclusive	DIM1	24181000	NA
Total_exclusive	VTC4	11619000	NA
Total_exclusive	PIL1	57232000	NA
Total_exclusive	COG4	5743400	NA
Total_exclusive	PAA1	60608000	NA
Total_exclusive	RPS25B	700290000	NA
Total_exclusive	PRO3	43839000	NA
Total_exclusive	RRP8	19101000	NA
Total_exclusive	HGH1	17941000	NA
Total_exclusive	MOT1	1288800	NA
Total_exclusive	PMR1	5673100	NA
Total_exclusive	SPT16	1613600	NA
Total_exclusive	REI1	24587000	NA
Total_exclusive	GND1	10773000	NA
Total_exclusive	SEC28	40770000	NA
Total_exclusive	SEH1	25364000	NA
Total_exclusive	HEM1	13420000	NA
Total_exclusive	FPR3	219370000	NA
Total_exclusive	MRPL35	14465000	NA
Total_exclusive	ALG2	11523000	NA
Total_exclusive	ERG10	8743600	NA
Total_exclusive	MET17	17795000	NA
Total_exclusive	POL1	1798300	NA
Total_exclusive	GAP1	24896000	NA
Total_exclusive	GCD11	19663000	NA
Total_exclusive	MRPL3	12979000	NA
Total_exclusive	MRPL24	15122000	NA
Total_exclusive	UTP7	14025000	NA
Total_exclusive	UTP18	28861000	NA
Total_exclusive	PMT4	17985000	NA
Total_exclusive	NUP84	4637200	NA
Total_exclusive	ERG5	10063000	NA
Total_exclusive	RRP9	15566000	NA
Total_exclusive	YNR021W	45770000	NA
Total_exclusive	UBA4	19629000	NA
Total_exclusive	VPS35	2835000	NA
Total_exclusive	NSA2	39558000	NA
Total_exclusive	TSA1	89265000	NA
Total_exclusive	NUP145	3006200	NA
Total_exclusive	TRP3	17837000	NA
Total_exclusive	RPP2B	430200000	NA
Total_exclusive	ERG12	17134000	NA
Total_exclusive	SEC53	20650000	NA
Total_exclusive	PMT2	13364000	NA
Total_exclusive	MDJ1	14735000	NA
Total_exclusive	TYW1	4311200	NA
Total_exclusive	DBP8	6140900	NA
Total_exclusive	OST1	19745000	NA
Total_exclusive	SSD1	112810000	NA
Total_exclusive	TRP5	3382100	NA
Total_exclusive	ENA2	6467300	NA
Total_exclusive	CCR4	6580300	NA
Total_exclusive	RPL21A	4594900000	NA
Total_exclusive	NOT3	5643900	NA
Total_exclusive	RPO21	1917500	NA
Total_exclusive	VTC3	2665700	NA
Total_exclusive	OXP1	1467700	NA
Total_exclusive	STT3	9247200	NA
Total_exclusive	RFC2	9802300	NA
Total_exclusive	TMA108	2907100	NA
Total_exclusive	ROK1	12190000	NA
Total_exclusive	MTR4	2788800	NA
Total_exclusive	YML6	34211000	NA
Total_exclusive	RCL1	14445000	NA
Total_exclusive	RPN8	26154000	NA
Total_exclusive	YRA1	52689000	NA
Total_exclusive	MTR10	4922100	NA
Total_exclusive	ARC35	14848000	NA
Total_exclusive	MRN1	10405000	NA
Total_exclusive	TOM40	36063000	NA
Total_exclusive	BEM4	5063500	NA
Total_exclusive	NOP14	4254500	NA
Total_exclusive	HSP26	63360000	NA
Total_exclusive	AAT2	13973000	NA
Total_exclusive	ERG1	12242000	NA
Total_exclusive	SDH1	7346800	NA
Total_exclusive	PDR12	1192300	NA
Total_exclusive	HEH2	3839700	NA
Total_exclusive	RSC3	3982300	NA
Total_exclusive	ALG9	13959000	NA
Total_exclusive	PUF3	4689400	NA
Total_exclusive	TIF5	20814000	NA
Total_exclusive	CBR1	25965000	NA
Total_exclusive	PUP2	35590000	NA
Total_exclusive	MRD1	2849200	NA
Total_exclusive	SES1	15292000	NA
Total_exclusive	MGM101	13509000	NA
Total_exclusive	CKA2	20094000	NA
Total_exclusive	SLY1	7278400	NA
Total_exclusive	ARP3	14914000	NA
Total_exclusive	YVH1	15318000	NA
Total_exclusive	NOP8	6224600	NA
Total_exclusive	MRP4	7706000	NA
Total_exclusive	RQC2	2620800	NA
Total_exclusive	APE2	2200900	NA
Total_exclusive	NUP82	5224100	NA
Total_exclusive	MAK16	31024000	NA
Total_exclusive	COQ1	8947000	NA
Total_exclusive	PRE9	20841000	NA
Total_exclusive	CPS1	12663000	NA
Total_exclusive	VMA5	6761100	NA
Total_exclusive	MRPL7	19580000	NA
Total_exclusive	PHO88	56082000	NA
Total_exclusive	SSH1	75329000	NA
Total_exclusive	VAC8	9104900	NA
Total_exclusive	SCS2	51661000	NA
Total_exclusive	YPP1	4866900	NA
Total_exclusive	RPS27A	11706000000	NA
Total_exclusive	UTP5	9344300	NA
Total_exclusive	PIM1	1957600	NA
Total_exclusive	PGM1	34878000	NA
Total_exclusive	GPI17	14958000	NA
Total_exclusive	SEC31	2587000	NA
Total_exclusive	SMC3	1420100	NA
Total_exclusive	COG3	2379700	NA
Total_exclusive	MRPL13	12759000	NA
Total_exclusive	TUF1	5495700	NA
Total_exclusive	HXK2	11965000	NA
Total_exclusive	TCD2	8294900	NA
Total_exclusive	ATP3	38275000	NA
Total_exclusive	TAF5	3506700	NA
Total_exclusive	PRE6	36475000	NA
Total_exclusive	EMC2	13655000	NA
Total_exclusive	EGD1	92980000	NA
Total_exclusive	RSN1	12207000	NA
Total_exclusive	NIP7	39553000	NA
Total_exclusive	RFC1	2757800	NA
Total_exclusive	COX2	61771000	NA
Total_exclusive	ILV6	25344000	NA
Total_exclusive	YTA12	2578300	NA
Total_exclusive	IML2	4471900	NA
Total_exclusive	FRD1	3414700	NA
Total_exclusive	ARF1	23674000	NA
Total_exclusive	THR1	33988000	NA
Total_exclusive	MRPS35	11400000	NA
Total_exclusive	PRE10	29424000	NA
Total_exclusive	SQT1	35617000	NA
Total_exclusive	MRPL17	9353800	NA
Total_exclusive	APM3	6666300	NA
Total_exclusive	BAT1	14002000	NA
Total_exclusive	EMP47	16256000	NA
Total_exclusive	COG8	3458500	NA
Total_exclusive	TSC13	19946000	NA
Total_exclusive	RPS10A	4171100000	NA
Total_exclusive	YDR089W	2212600	NA
Total_exclusive	TOR1	310670	NA
Total_exclusive	PBY1	3463900	NA
Total_exclusive	HOM6	8615300	NA
Total_exclusive	RFC5	10770000	NA
Total_exclusive	GAR1	183430000	NA
Total_exclusive	SSM4	3494500	NA
Total_exclusive	GLC7	6941300	NA
Total_exclusive	SIS1	21365000	NA
Total_exclusive	SEC15	4226200	NA
Total_exclusive	RTS1	3825500	NA
Total_exclusive	ADE5	3468300	NA
Total_exclusive	NAP1	8020600	NA
Total_exclusive	ERG4	21410000	NA
Total_exclusive	NAM9	4711700	NA
Total_exclusive	RIM2	12562000	NA
Total_exclusive	LOC1	102370000	NA
Total_exclusive	INO80	2997800	NA
Total_exclusive	CAF40	13959000	NA
Total_exclusive	MRPL22	7325200	NA
Total_exclusive	ARP9	10118000	NA
Total_exclusive	RPN6	17194000	NA
Total_exclusive	FRS2	8510200	NA
Total_exclusive	SLC1	19103000	NA
Total_exclusive	DBP10	4043100	NA
Total_exclusive	HMG2	8111000	NA
Total_exclusive	RPN5	7276300	NA
Total_exclusive	EIS1	997560	NA
Total_exclusive	RPN12	9097600	NA
Total_exclusive	CDC33	39829000	NA
Total_exclusive	IDI1	12652000	NA
Total_exclusive	POL30	11951000	NA
Total_exclusive	NCP1	3365900	NA
Total_exclusive	PPH22	5713800	NA
Total_exclusive	SRP101	4685500	NA
Total_exclusive	GDH2	1849400	NA
Total_exclusive	GPI16	6282200	NA
Total_exclusive	VTC2	1840300	NA
Total_exclusive	DNM1	1041200	NA
Total_exclusive	EMG1	11974000	NA
Total_exclusive	SEC61	45386000	NA
Total_exclusive	TAO3	183880	NA
Total_exclusive	RRP1	29932000	NA
Total_exclusive	YKR018C	5266900	NA
Total_exclusive	RPS26A	2497200000	NA
Total_exclusive	KTR3	10291000	NA
Total_exclusive	PNO1	28112000	NA
Total_exclusive	RFC3	5615600	NA
Total_exclusive	YGR210C	7218700	NA
Total_exclusive	LYS9	5325700	NA
Total_exclusive	ILV3	5454700	NA
Total_exclusive	PET123	13801000	NA
Total_exclusive	IMG1	17576000	NA
Total_exclusive	MYO4	961250	NA
Total_exclusive	DBP7	1914900	NA
Total_exclusive	MRPS9	18655000	NA
Total_exclusive	BFR1	5032200	NA
Total_exclusive	GPP1	52985000	NA
Total_exclusive	PHO86	23361000	NA
Total_exclusive	RCM1	3940500	NA
Total_exclusive	FSF1	90998000	NA
Total_exclusive	ARP8	3670800	NA
Total_exclusive	TKL1	3274700	NA
Total_exclusive	APL4	1911700	NA
Total_exclusive	SCS7	21026000	NA
Total_exclusive	MRPL40	15660000	NA
Total_exclusive	RSM24	8573300	NA
Total_exclusive	DRS1	1986400	NA
Total_exclusive	IMP4	16918000	NA
Total_exclusive	RIP1	38390000	NA
Total_exclusive	BPT1	737580	NA
Total_exclusive	PDI1	3807300	NA
Total_exclusive	ACO1	2660600	NA
Total_exclusive	SRP54	8534000	NA
Total_exclusive	IDP1	2846600	NA
Total_exclusive	PRE8	21127000	NA
Total_exclusive	SCJ1	8847200	NA
Total_exclusive	BUD23	63733000	NA
Total_exclusive	NHP2	142470000	NA
Total_exclusive	SEC8	1567400	NA
Total_exclusive	CYM1	1104000	NA
Total_exclusive	SOF1	3294100	NA
Total_exclusive	EXO84	1251200	NA
Total_exclusive	TOM71	3685900	NA
Total_exclusive	PRE5	33896000	NA
Total_exclusive	RFC4	7078400	NA
Total_exclusive	MNN11	14661000	NA
Total_exclusive	LYS20	5509000	NA
Total_exclusive	PHB2	21123000	NA
Total_exclusive	TAF6	5133000	NA
Total_exclusive	ERG25	51592000	NA
Total_exclusive	SRP1	8235100	NA
Total_exclusive	MRPS17	10849000	NA
Total_exclusive	NOC4	9738500	NA
Total_exclusive	MHR1	14045000	NA
Total_exclusive	MRH1	57220000	NA
Total_exclusive	ODC2	18618000	NA
Total_exclusive	POL12	2379400	NA
Total_exclusive	PTR2	8873400	NA
Total_exclusive	DNF2	902220	NA
Total_exclusive	YMC2	8020100	NA
Total_exclusive	PPM2	2240000	NA
Total_exclusive	CRG1	12035000	NA
Total_exclusive	HTB2	32614000	NA
Total_exclusive	SVL3	2984600	NA
Total_exclusive	RPP1	7266200	NA
Total_exclusive	DIC1	10245000	NA
Total_exclusive	MRPS5	12839000	NA
Total_exclusive	APL6	1598500	NA
Total_exclusive	GCN20	2468000	NA
Total_exclusive	CTP1	7509500	NA
Total_exclusive	VPS13	291520	NA
Total_exclusive	FRS1	4259400	NA
Total_exclusive	MSH6	1589900	NA
Total_exclusive	ARD1	23571000	NA
Total_exclusive	MOD5	2115000	NA
Total_exclusive	GLN4	1342400	NA
Total_exclusive	SPT15	17202000	NA
Total_exclusive	GAS1	13939000	NA
Total_exclusive	KTR1	7416000	NA
Total_exclusive	ERG9	10905000	NA
Total_exclusive	SEC5	670130	NA
Total_exclusive	RSM28	13221000	NA
Total_exclusive	HMO1	141970000	NA
Total_exclusive	HSP42	15149000	NA
Total_exclusive	ARE2	11250000	NA
Total_exclusive	POM152	785020	NA
Total_exclusive	PTC3	7632500	NA
Total_exclusive	YBP2	4833000	NA
Total_exclusive	DNF1	891680	NA
Total_exclusive	RKM4	6113900	NA
Total_exclusive	RSE1	650070	NA
Total_exclusive	ATP4	12568000	NA
Total_exclusive	YOR1	806130	NA
Total_exclusive	RPF2	20372000	NA
Total_exclusive	RPS29B	149990000	NA
Total_exclusive	HSH155	1245000	NA
Total_exclusive	NST1	2835500	NA
Total_exclusive	SOD2	72515000	NA
Total_exclusive	SEC4	13553000	NA
Total_exclusive	PUF4	8872600	NA
Total_exclusive	YMC1	9383600	NA
Total_exclusive	EFB1	32687000	NA
Total_exclusive	SCT1	2345200	NA
Total_exclusive	LIP5	7621200	NA
Total_exclusive	RPC34	9963600	NA
Total_exclusive	PRP8	241890	NA
Total_exclusive	TMA19	127150000	NA
Total_exclusive	MCD4	3075300	NA
Total_exclusive	MRPL10	10143000	NA
Total_exclusive	SHM2	4724800	NA
Total_exclusive	GLY1	5305800	NA
Total_exclusive	VID27	2575700	NA
Total_exclusive	RIO2	6939200	NA
Total_exclusive	VMA13	1459700	NA
Total_exclusive	RPN11	16300000	NA
Total_exclusive	ENP2	4003300	NA
Total_exclusive	RNR4	4151200	NA
Total_exclusive	YGR266W	4092800	NA
Total_exclusive	CDC10	5432000	NA
Total_exclusive	YHM2	133460000	NA
Total_exclusive	EMP70	5748300	NA
Total_exclusive	MRPL4	17908000	NA
Total_exclusive	GIN4	999490	NA
Total_exclusive	DHR2	1883100	NA
Total_exclusive	CAM1	37396000	NA
Total_exclusive	TPS3	1261300	NA
Total_exclusive	HIS4	1928200	NA
Total_exclusive	SAR1	17885000	NA
Total_exclusive	CTR86	3188100	NA
Total_exclusive	CYS3	15448000	NA
Total_exclusive	YBT1	761010	NA
Total_exclusive	LYP1	9095600	NA
Total_exclusive	SEC6	654280	NA
Total_exclusive	KDX1	4439900	NA
Total_exclusive	BAP2	7114300	NA
Total_exclusive	PBP2	7793000	NA
Total_exclusive	GUA1	3007300	NA
Total_exclusive	IRR1	1493100	NA
Total_exclusive	ASN2	3428300	NA
Total_exclusive	IMD3	7699400	NA
Total_exclusive	RTN1	21853000	NA
Total_exclusive	RQC1	1130400	NA
Total_exclusive	VPS74	7018600	NA
Total_exclusive	REH1	15184000	NA
Total_exclusive	NOP6	27962000	NA
Total_exclusive	EFG1	22352000	NA
Total_exclusive	PDR1	812220	NA
Total_exclusive	SRP102	4782500	NA
Total_exclusive	RSM7	6119200	NA
Total_exclusive	TOF1	879510	NA
Total_exclusive	PHO90	10810000	NA
Total_exclusive	DCP2	1550800	NA
Total_exclusive	EPS1	1160000	NA
Total_exclusive	ADE4	2532600	NA
Total_exclusive	RPL39	3709100000	NA
Total_exclusive	PUP3	37611000	NA
Total_exclusive	MRPL6	5640600	NA
Total_exclusive	PRE1	12434000	NA
Total_exclusive	SEC11	18845000	NA
Total_exclusive	RPA43	16168000	NA
Total_exclusive	RKM2	2534500	NA
Total_exclusive	DUN1	864470	NA
Total_exclusive	PRO1	6808900	NA
Total_exclusive	URK1	3740200	NA
Total_exclusive	IPP1	5922700	NA
Total_exclusive	BGL2	23451000	NA
Total_exclusive	STI1	1073500	NA
Total_exclusive	RPB3	5543800	NA
Total_exclusive	FPR1	29043000	NA
Total_exclusive	MSH1	1126500	NA
Total_exclusive	ERG3	12673000	NA
Total_exclusive	SHE2	9660400	NA
Total_exclusive	UTP30	3722600	NA
Total_exclusive	AHP1	7114900	NA
Total_exclusive	RVS167	7410400	NA
Total_exclusive	ISC1	4157700	NA
Total_exclusive	ERJ5	5621500	NA
Total_exclusive	RSM26	9055200	NA
Total_exclusive	SQS1	1109700	NA
Total_exclusive	MRP51	10059000	NA
Total_exclusive	SHS1	3168500	NA
Total_exclusive	ORT1	13931000	NA
Total_exclusive	RLF2	2312500	NA
Total_exclusive	EDC3	4706700	NA
Total_exclusive	GET3	9745500	NA
Total_exclusive	RIO1	1747800	NA
Total_exclusive	KRR1	8599200	NA
Total_exclusive	YGR122W	2530600	NA
Total_exclusive	ELO2	54470000	NA
Total_exclusive	ACL4	7134700	NA
Total_exclusive	PRI1	861420	NA
Total_exclusive	GDE1	1028900	NA
Total_exclusive	GPD2	9348700	NA
Total_exclusive	ARG5	978510	NA
Total_exclusive	MNN1	714300	NA
Total_exclusive	LTV1	11001000	NA
Total_exclusive	PTM1	8028500	NA
Total_exclusive	ADE6	489700	NA
Total_exclusive	NOT5	5721400	NA
Total_exclusive	IMP3	13733000	NA
Total_exclusive	AFG3	976570	NA
Total_exclusive	SRP14	21583000	NA
Total_exclusive	COG6	1222800	NA
Total_exclusive	KEX1	831740	NA
Total_exclusive	RPB8	28851000	NA
Total_exclusive	MRPS28	7657800	NA
Total_exclusive	MRPL8	11234000	NA
Total_exclusive	YCP4	2245000	NA
Total_exclusive	ASG1	1463900	NA
Total_exclusive	SAP185	813060	NA
Total_exclusive	SAM37	4317300	NA
Total_exclusive	ARP4	6288700	NA
Total_exclusive	RSC4	2597100	NA
Total_exclusive	CHS1	824530	NA
Total_exclusive	CDS1	5984200	NA
Total_exclusive	YGR250C	1508400	NA
Total_exclusive	SPN1	1546200	NA
Total_exclusive	FSH3	5767700	NA
Total_exclusive	BRE5	1850100	NA
Total_exclusive	PMT1	4662400	NA
Total_exclusive	MRP20	7863300	NA
Total_exclusive	HMT1	4269100	NA
Total_exclusive	RPA49	3725400	NA
Total_exclusive	GPN2	6277000	NA
Total_exclusive	URA8	15128000	NA
Total_exclusive	HOM3	2173100	NA
Total_exclusive	TRP1	14994000	NA
Total_exclusive	AIM24	2109800	NA
Total_exclusive	NSG1	16914000	NA
Total_exclusive	TOR2	108930	NA
Total_exclusive	YPT1	11675000	NA
Total_exclusive	YLR419W	528050	NA
Total_exclusive	GPA1	2019700	NA
Total_exclusive	DPH6	1885300	NA
Total_exclusive	RDH54	904710	NA
Total_exclusive	CHD1	329660	NA
Total_exclusive	TYR1	2692700	NA
Total_exclusive	RPC53	3646500	NA
Total_exclusive	SEC65	10610000	NA
Total_exclusive	PRE2	9330900	NA
Total_exclusive	UGP1	1654800	NA
Total_exclusive	SKT5	2146000	NA
Total_exclusive	RKM3	4059500	NA
Total_exclusive	VPS29	10742000	NA
Total_exclusive	SPP41	394700	NA
Total_exclusive	MNN9	12090000	NA
Total_exclusive	SMB1	9714600	NA
Total_exclusive	APS3	29679000	NA
Total_exclusive	GEA1	578190	NA
Total_exclusive	MUP1	15621000	NA
Total_exclusive	TPS1	5708500	NA
Total_exclusive	TBF1	3041100	NA
Total_exclusive	EFR3	2960800	NA
Total_exclusive	LOA1	17889000	NA
Total_exclusive	FAP7	5944000	NA
Total_exclusive	SPE3	7825800	NA
Total_exclusive	UTP23	10044000	NA
Total_exclusive	HLJ1	17759000	NA
Total_exclusive	NUT1	707850	NA
Total_exclusive	NDC1	1798500	NA
Total_exclusive	KRE2	1909800	NA
Total_exclusive	FAR8	2095100	NA
Total_exclusive	TPA1	1159200	NA
Total_exclusive	EMP24	9016000	NA
Total_exclusive	SPT5	988330	NA
Total_exclusive	GCG1	11744000	NA
Total_exclusive	ARC18	4891000	NA
Total_exclusive	LAG1	4310700	NA
Total_exclusive	CPR1	15016000	NA
Total_exclusive	TRM8	3732200	NA
Total_exclusive	ANB1	32520000	NA
Total_exclusive	CST26	2390100	NA
Total_exclusive	SUI2	2774100	NA
Total_exclusive	REX4	5475200	NA
Total_exclusive	MOT2	2555500	NA
Total_exclusive	LIA1	4841400	NA
Total_exclusive	PRS4	6992700	NA
Total_exclusive	LAC1	5089600	NA
Total_exclusive	CKA1	1071100	NA
Total_exclusive	SUM1	239880	NA
Total_exclusive	MBP1	2820300	NA
Total_exclusive	RPS30B	885890000	NA
Total_exclusive	ARG1	2267800	NA
Total_exclusive	RML2	3987000	NA
Total_exclusive	APM4	1837600	NA
Total_exclusive	SEN1	167090	NA
Total_exclusive	UBR1	166700	NA
Total_exclusive	SNU13	19498000	NA
Total_exclusive	NOP15	56749000	NA
Total_exclusive	CDC9	802160	NA
Total_exclusive	HTS1	2849700	NA
Total_exclusive	HCH1	20208000	NA
Total_exclusive	MKT1	1001500	NA
Total_exclusive	UBX2	4185800	NA
Total_exclusive	CLA4	1178800	NA
Total_exclusive	NDE1	1229200	NA
Total_exclusive	TAF12	924830	NA
Total_exclusive	NDI1	1561600	NA
Total_exclusive	RPO41	446800	NA
Total_exclusive	ERG20	4061600	NA
Total_exclusive	ZWF1	724220	NA
Total_exclusive	RPB5	14285000	NA
Total_exclusive	RAD23	1478100	NA
Total_exclusive	NPL6	1415200	NA
Total_exclusive	YPT7	7917100	NA
Total_exclusive	SRB2	4365900	NA
Total_exclusive	GLE2	3060400	NA
Total_exclusive	GCD14	1453500	NA
Total_exclusive	MRH4	1346000	NA
Total_exclusive	MAK3	4614900	NA
Total_exclusive	SFH1	15501000	NA
Total_exclusive	DSL1	1108900	NA
Total_exclusive	RSC9	2800400	NA
Total_exclusive	ALD5	1589400	NA
Total_exclusive	DBP6	2209000	NA
Total_exclusive	MRP1	8066800	NA
Total_exclusive	PRS2	5683900	NA
Total_exclusive	ESC1	898620	NA
Total_exclusive	ARP7	2851300	NA
Total_exclusive	STV1	1265900	NA
Total_exclusive	SEC62	18288000	NA
Total_exclusive	SRP21	60326000	NA
Total_exclusive	TRS120	621700	NA
Total_exclusive	YHR122W	13457000	NA
Total_exclusive	ORC5	2499800	NA
Total_exclusive	YIL108W	855280	NA
Total_exclusive	ERV25	13293000	NA
Total_exclusive	SAM50	2060200	NA
Total_exclusive	YPQ1	19668000	NA
Total_exclusive	MRPL1	4069900	NA
Total_exclusive	RPP2A	43697000	NA
Total_exclusive	URE2	3408900	NA
Total_exclusive	TAF14	4499400	NA
Total_exclusive	TRS130	1076500	NA
Total_exclusive	CTR9	368020	NA
Total_exclusive	OPI3	10675000	NA
Total_exclusive	GLR1	790370	NA
Total_exclusive	DEF1	14735000	NA
Total_exclusive	MED1	397180	NA
Total_exclusive	TYS1	1757200	NA
Total_exclusive	PSK2	225110	NA
Total_exclusive	MEU1	12103000	NA
Total_exclusive	LYS12	4454400	NA
Total_exclusive	SUP35	699120	NA
Total_exclusive	PEP1	194880	NA
Total_exclusive	THO2	118100	NA
Total_exclusive	IES1	267310	NA
Total_exclusive	ALE1	3896600	NA
Total_exclusive	IPI1	3812600	NA
Total_exclusive	PPZ1	1653100	NA
Total_exclusive	POP2	8817600	NA
Total_exclusive	MAM33	20800000	NA
Total_exclusive	BRE1	464410	NA
Total_exclusive	STE2	6752300	NA
Total_exclusive	NSP1	1014200	NA
Total_exclusive	LAP3	592410	NA
Total_exclusive	MRPL15	11318000	NA
Total_exclusive	SSP120	15487000	NA
Total_exclusive	ELP2	1585000	NA
Total_exclusive	ERP1	6131600	NA
Total_exclusive	VID22	1875300	NA
Total_exclusive	PET10	2525000	NA
Total_exclusive	NPA3	12300000	NA
Total_exclusive	GAS5	3764700	NA
Total_exclusive	SPC2	17979000	NA
Total_exclusive	PSK1	324790	NA
Total_exclusive	APL2	1922800	NA
Total_exclusive	FUR1	1575000	NA
Total_exclusive	TOM22	18617000	NA
Total_exclusive	REB1	876610	NA
Total_exclusive	COY1	713690	NA
Total_exclusive	TOM20	10345000	NA
Total_exclusive	GBP2	10715000	NA
Total_exclusive	MGR1	2222300	NA
Total_exclusive	YKL100C	3378500	NA
Total_exclusive	PRE3	6602700	NA
Total_exclusive	SIT4	3157400	NA
Total_exclusive	RPC19	18236000	NA
Total_exclusive	TIM23	15614000	NA
Total_exclusive	WHI3	8393900	NA
Total_exclusive	HOC1	3707400	NA
Total_exclusive	PGC1	5534100	NA
Total_exclusive	TRM82	3041600	NA
Total_exclusive	FET3	11804000	NA
Total_exclusive	TAL1	3575400	NA
Total_exclusive	ORC3	1391700	NA
Total_exclusive	CDC36	10601000	NA
Total_exclusive	MNN10	5660000	NA
Total_exclusive	HSM3	2105200	NA
Total_exclusive	CDC3	1024400	NA
Total_exclusive	CPA1	1417100	NA
Total_exclusive	MYO5	443620	NA
Total_exclusive	FUS3	1464700	NA
Total_exclusive	CKI1	1557100	NA
Total_exclusive	TAH11	975510	NA
Total_exclusive	SHE4	802040	NA
Total_exclusive	POP1	206080	NA
Total_exclusive	ARO9	1674300	NA
Total_exclusive	YGL039W	2811300	NA
Total_exclusive	THR4	680810	NA
Total_exclusive	LSP1	3461300	NA
Total_exclusive	YGL140C	417650	NA
Total_exclusive	RNR2	1686800	NA
Total_exclusive	YPL225W	3736600	NA
Total_exclusive	RCF1	13488000	NA
Total_exclusive	BEM1	1871000	NA
Total_exclusive	CCC1	4537400	NA
Total_exclusive	GYP5	287220	NA
Total_exclusive	YBR287W	15380000	NA
Total_exclusive	PHO81	1517000	NA
Total_exclusive	YPL245W	2309400	NA
Total_exclusive	RFA1	920790	NA
Total_exclusive	HIR2	425210	NA
Total_exclusive	RER2	4230800	NA
Total_exclusive	PEP3	900070	NA
Total_exclusive	SRV2	1733600	NA
Total_exclusive	VMA4	5658100	NA
Total_exclusive	MRPL49	17722000	NA
Total_exclusive	OST3	6976500	NA
Total_exclusive	RPN13	32165000	NA
Total_exclusive	PUB1	31725000	NA
Total_exclusive	ARC19	23030000	NA
Total_exclusive	AHA1	2604300	NA
Total_exclusive	RFA2	3250700	NA
Total_exclusive	RSA4	5157900	NA
Total_exclusive	FRE1	1926000	NA
Total_exclusive	RMD9	732310	NA
Total_exclusive	JJJ1	1436500	NA
Total_exclusive	CPR6	4522100	NA
Total_exclusive	YMR310C	4771900	NA
Total_exclusive	SCH9	2964600	NA
Total_exclusive	SWI6	1454100	NA
Total_exclusive	RSM10	18033000	NA
Total_exclusive	YDR476C	14778000	NA
Total_exclusive	HTA1	141080000	NA
Total_exclusive	SUR1	1023900	NA
Total_exclusive	NSG2	13878000	NA
Total_exclusive	MRPL11	2606300	NA
Total_exclusive	ERG7	918230	NA
Total_exclusive	MCP2	737310	NA
Total_exclusive	AXL1	53029	NA
Total_exclusive	RRS1	16189000	NA
Total_exclusive	STE6	265230	NA
Total_exclusive	SNU114	441510	NA
Total_exclusive	SYF1	1062100	NA
Total_exclusive	SHO1	2323600	NA
Total_exclusive	HUL5	854120	NA
Total_exclusive	GYL1	344830	NA
Total_exclusive	SMD1	1266900	NA
Total_exclusive	IRA1	53954	NA
Total_exclusive	BUD21	646690	NA
Total_exclusive	FAA3	5686800	NA
Total_exclusive	TIM50	1918500	NA
Total_exclusive	XDJ1	2086700	NA
Total_exclusive	SPC3	12176000	NA
Total_exclusive	LCP5	2963700	NA
Total_exclusive	ALG5	3633700	NA
Total_exclusive	TOP1	140640	NA
Total_exclusive	RBG2	2876100	NA
Total_exclusive	LCB4	1631600	NA
Total_exclusive	PHO91	1210100	NA
Total_exclusive	PRP6	440190	NA
Total_exclusive	DPB2	629910	NA
Total_exclusive	SST2	1591200	NA
Total_exclusive	DRS2	445060	NA
Total_exclusive	FCF2	2190500	NA
Total_exclusive	LSO2	66810000	NA
Total_exclusive	APE1	1188900	NA
Total_exclusive	MRP2	6806100	NA
Total_exclusive	LST8	2388400	NA
Total_exclusive	ECM1	17224000	NA
Total_exclusive	CDC1	2321100	NA
Total_exclusive	FMP42	2735400	NA
Total_exclusive	COX15	6074900	NA
Total_exclusive	SRP40	20787000	NA
Total_exclusive	FMP30	1624900	NA
Total_exclusive	YNR040W	2749800	NA
Total_exclusive	DAS2	7313700	NA
Total_exclusive	AGP1	1788800	NA
Total_exclusive	DCP1	3892800	NA
Total_exclusive	GCD10	5698100	NA
Total_exclusive	SEC14	2316000	NA
Total_exclusive	DFM1	6374900	NA
Total_exclusive	EFM2	2032400	NA
Total_exclusive	PRE4	7850800	NA
Total_exclusive	VAC14	584470	NA
Total_exclusive	MPD1	587470	NA
Total_exclusive	NNT1	3460100	NA
Total_exclusive	ANP1	1204000	NA
Total_exclusive	SMC1	311220	NA
Total_exclusive	POP8	8251700	NA
Total_exclusive	MRPL23	7345900	NA
Total_exclusive	GUP1	3837600	NA
Total_exclusive	GYP8	1177700	NA
Total_exclusive	YGL117W	6668500	NA
Total_exclusive	RPC17	5658300	NA
Total_exclusive	ADI1	2415800	NA
Total_exclusive	MRPL25	7736300	NA
Total_exclusive	HST2	1026600	NA
Total_exclusive	PEP4	3288100	NA
Total_exclusive	NUP57	407000	NA
Total_exclusive	RAD5	125120	NA
Total_exclusive	RSC6	2433800	NA
Total_exclusive	GAA1	3281600	NA
Total_exclusive	ITR1	3235200	NA
Total_exclusive	TAT1	4301300	NA
Total_exclusive	ZRC1	6490300	NA
Total_exclusive	PST2	4588300	NA
Total_exclusive	YCS4	215860	NA
Total_exclusive	BAP3	1796200	NA
Total_exclusive	YGR125W	762120	NA
Total_exclusive	GAT1	1621200	NA
Total_exclusive	SNF2	576600	NA
Total_exclusive	CUL3	425940	NA
Total_exclusive	TUP1	723320	NA
Total_exclusive	NTE1	470210	NA
Total_exclusive	UBP15	146700	NA
Total_exclusive	PEP5	738620	NA
Total_exclusive	YRF1-3	38689	NA
Total_exclusive	TRM12	1824300	NA
Total_exclusive	SMC2	234270	NA
Total_exclusive	TIM54	1740300	NA
Total_exclusive	ALB1	19093000	NA
Total_exclusive	YGR130C	340370	NA
Total_exclusive	SGT2	335470	NA
Total_exclusive	ISW1	342890	NA
Total_exclusive	CDC34	6040900	NA
Total_exclusive	NPL3	4157400	NA
Total_exclusive	COF1	9214100	NA
Total_exclusive	ELO3	15191000	NA
Total_exclusive	MTC1	441760	NA
Total_exclusive	PTC1	2233700	NA
Total_exclusive	DPH1	1878500	NA
Total_exclusive	ORM1	11644000	NA
Total_exclusive	SSL1	407420	NA
Total_exclusive	BUD20	13009000	NA
Total_exclusive	ZPR1	655340	NA
Total_exclusive	POM34	6098100	NA
Total_exclusive	BNA4	863500	NA
Total_exclusive	SEC39	1002400	NA
Total_exclusive	RFA3	33820000	NA
Total_exclusive	RPC37	2166400	NA
Total_exclusive	TIM11	17939000	NA
Total_exclusive	GCN5	586550	NA
Total_exclusive	TRS31	3470400	NA
Total_exclusive	RTT101	187220	NA
Total_exclusive	RRP14	2769800	NA
Total_exclusive	PUP1	2679500	NA
Total_exclusive	FTR1	4588800	NA
Total_exclusive	PRE7	2100800	NA
Total_exclusive	SOD1	8140400	NA
Total_exclusive	SPT14	749200	NA
Total_exclusive	LEU4	707470	NA
Total_exclusive	MLC1	1895700	NA
Total_exclusive	MBF1	15690000	NA
Total_exclusive	SUI3	1858000	NA
Total_exclusive	OCA1	2614200	NA
Total_exclusive	RVS161	2774700	NA
Total_exclusive	RET3	10569000	NA
Total_exclusive	YHR127W	2924000	NA
Total_exclusive	YDL144C	2737600	NA
Total_exclusive	RPB10	13536000	NA
Total_exclusive	ARO2	2435000	NA
Total_exclusive	YPK1	311380	NA
Total_exclusive	HFD1	1809100	NA
Total_exclusive	UBA1	440080	NA
Total_exclusive	RPD3	383280	NA
Total_exclusive	STE4	1382100	NA
Total_exclusive	YCG1	371370	NA
Total_exclusive	SSF2	1563900	NA
Total_exclusive	APM1	586700	NA
Total_exclusive	VMA22	2066700	NA
Total_exclusive	PHO87	374720	NA
Total_exclusive	SMY2	1727900	NA
Total_exclusive	YOS9	1538300	NA
Total_exclusive	CBP3	2741300	NA
Total_exclusive	CAF4	775620	NA
Total_exclusive	SPT7	253560	NA
Total_exclusive	BAT2	4671100	NA
Total_exclusive	SWI3	452240	NA
Total_exclusive	TRM44	238670	NA
Total_exclusive	TIP20	202810	NA
Total_exclusive	PMC1	235720	NA
Total_exclusive	DHH1	128690	NA
Total_exclusive	NBP35	4449100	NA
Total_exclusive	RSM22	423280	NA
Total_exclusive	ECM32	119720	NA
Total_exclusive	QNS1	817710	NA
Total_exclusive	MRPL51	3977700	NA
Total_exclusive	EMC1	1397800	NA
Total_exclusive	FMP10	4056300	NA
Total_exclusive	MRPL31	4226100	NA
Total_exclusive	SAM3	6377000	NA
Total_exclusive	GPI8	1912800	NA
Total_exclusive	ESF1	865710	NA
Total_exclusive	MIC10	13248000	NA
Total_exclusive	RTT10	167290	NA
Total_exclusive	MCY1	737500	NA
Total_exclusive	DST1	5468700	NA
Total_exclusive	BUD22	1382500	NA
Total_exclusive	NPC2	800720	NA
Total_exclusive	ICE2	872850	NA
Total_exclusive	STE5	539430	NA
Total_exclusive	ERG2	19101000	NA
Total_exclusive	PEX1	252710	NA
Total_exclusive	NEO1	528710	NA
Total_exclusive	WHI4	1367200	NA
Total_exclusive	SMD2	9226500	NA
Total_exclusive	GSP1	275620	NA
Total_exclusive	FAR11	275150	NA
Total_exclusive	AEP2	249720	NA
Total_exclusive	BMT6	1106400	NA
Total_exclusive	CSC1	852240	NA
Total_exclusive	FCY2	11061000	NA
Total_exclusive	ERG6	1235300	NA
Total_exclusive	COQ6	613400	NA
Total_exclusive	SNF12	349180	NA
Total_exclusive	KRE6	1065000	NA
Total_exclusive	MRPS18	1158200	NA
Total_exclusive	HIR3	100620	NA
Total_exclusive	RPL42A	8416100	NA
Total_exclusive	LEM3	1959000	NA
Total_exclusive	ECM33	51335000	NA
Total_exclusive	TPT1	1506800	NA
Total_exclusive	APT1	5255100	NA
Total_exclusive	YVC1	3125200	NA
Total_exclusive	CDC53	318150	NA
Total_exclusive	MET13	805990	NA
Total_exclusive	COX4	7862200	NA
Total_exclusive	RHO3	1457700	NA
Total_exclusive	YMR226C	992150	NA
Total_exclusive	MRPL36	3473300	NA
Total_exclusive	VOA1	2489800	NA
Total_exclusive	CIA1	887970	NA
Total_exclusive	LEU3	3188400	NA
Total_exclusive	CCA1	1338200	NA
Total_exclusive	SWR1	82295	NA
Total_exclusive	KSS1	933850	NA
Total_exclusive	APL1	410500	NA
Total_exclusive	ATP5	808830	NA
Total_exclusive	DDI1	788440	NA
Total_exclusive	MRPL16	1594400	NA
Total_exclusive	SAM35	2921600	NA
Total_exclusive	ADE16	211950	NA
Total_exclusive	TAF2	135010	NA
Total_exclusive	GPN3	7890800	NA
Total_exclusive	MRS3	1507800	NA
Total_exclusive	LMO1	226480	NA
Total_exclusive	SEA4	371300	NA
Total_exclusive	ALG11	379600	NA
Total_exclusive	NUP116	703560	NA
Total_exclusive	SLF1	860840	NA
Total_exclusive	RPM2	314580	NA
Total_exclusive	HHO1	4515900	NA
Total_exclusive	DRE2	3195000	NA
Total_exclusive	RAD3	81107	NA
Total_exclusive	CHS3	181480	NA
Total_exclusive	SHB17	1141800	NA
Total_exclusive	PCT1	2097400	NA
Total_exclusive	MNR2	528700	NA
Total_exclusive	NFS1	1103200	NA
Total_exclusive	SOK1	232320	NA
Total_exclusive	UBP1	507300	NA
Total_exclusive	UTP11	1567100	NA
Total_exclusive	PSY2	59320	NA
Total_exclusive	CWH43	1472000	NA
Total_exclusive	VMA8	5692700	NA
Total_exclusive	TIM21	784380	NA
Total_exclusive	ARA1	847280	NA
Total_exclusive	TGL1	190060	NA
Total_exclusive	RFT1	1365300	NA
Total_exclusive	RRP6	479120	NA
Total_exclusive	RSC58	734330	NA
Total_exclusive	ERV46	6055500	NA
Total_exclusive	GVP36	1442100	NA
Total_exclusive	MRPS8	3454300	NA
Total_exclusive	MRI1	247120	NA
Total_exclusive	CDC12	1101300	NA
Total_exclusive	TTI1	395720	NA
Total_exclusive	COX9	14560000	NA
Total_exclusive	EFM5	2466500	NA
Total_exclusive	SWD1	344580	NA
Total_exclusive	ERV29	8116800	NA
Total_exclusive	VBA4	6603300	NA
Total_exclusive	PAP2	793170	NA
Total_exclusive	UBC6	1308400	NA
Total_exclusive	TRM10	1121300	NA
Total_exclusive	OXA1	1414000	NA
Total_exclusive	WTM1	1609900	NA
Total_exclusive	ATP17	10419000	NA
Total_exclusive	POP5	3129900	NA
Total_exclusive	UGO1	559500	NA
Total_exclusive	CAF130	100580	NA
Total_exclusive	UFE1	840310	NA
Total_exclusive	YPR011C	979660	NA
Total_exclusive	RSC30	1057300	NA
Total_exclusive	SIS2	105070	NA
Total_exclusive	BET3	8382500	NA
Total_exclusive	ADH3	1006000	NA
Total_exclusive	RHO1	5927900	NA
Total_exclusive	CYB5	12884000	NA
Total_exclusive	YPR147C	2562600	NA
Total_exclusive	MTO1	634530	NA
Total_exclusive	RTP1	325630	NA
Total_exclusive	PHO8	9274800	NA
Total_exclusive	SNO1	1475000	NA
Total_exclusive	COG1	250210	NA
Total_exclusive	ECM22	247960	NA
Total_exclusive	VAR1	1805700	NA
Total_exclusive	MTM1	743000	NA
Total_exclusive	GYP1	178990	NA
Total_exclusive	GPB1	198850	NA
Total_exclusive	HEM13	1277400	NA
Total_exclusive	URA5	837320	NA
Total_exclusive	ELP6	4176300	NA
Total_exclusive	UFD2	167870	NA
Total_exclusive	RRP45	1338200	NA
Total_exclusive	CWC22	359570	NA
Total_exclusive	CBP2	914580	NA
Total_exclusive	SMC4	81457	NA
Total_exclusive	SNU56	276330	NA
Total_exclusive	PET127	81425	NA
Total_exclusive	MDM20	186070	NA
Total_exclusive	VPS54	293470	NA
Total_exclusive	ALT2	901540	NA
Total_exclusive	RSP5	357680	NA
Total_exclusive	YNL193W	238200	NA
Total_exclusive	ECM30	13382	NA
Total_exclusive	YSH1	253510	NA
Total_exclusive	RSM25	3783400	NA
Total_exclusive	KGD1	158670	NA
Total_exclusive	GEF1	665690	NA
Total_exclusive	BUD7	831300	NA
Total_exclusive	TCM62	90835	NA
Total_exclusive	TFC4	280980	NA
Total_exclusive	DGA1	238380	NA
Total_exclusive	GET4	3719600	NA
Total_exclusive	MRPL9	5142000	NA
Total_exclusive	IMG2	2249300	NA
Total_exclusive	DIP5	340520	NA
Total_exclusive	YME2	292940	NA
Total_exclusive	TVP18	3423700	NA
Total_exclusive	ATG33	4664900	NA
Total_exclusive	SGN1	1303600	NA
Total_exclusive	PMT6	1096300	NA
Total_exclusive	CKB2	2587300	NA
Total_exclusive	RPC31	8281400	NA
Total_exclusive	CAP1	744660	NA
Total_exclusive	HRT1	4132400	NA
Total_exclusive	YMR099C	2891700	NA
Total_exclusive	SCW4	1493200	NA
Total_exclusive	SNL1	5178400	NA
Total_exclusive	ADO1	3075100	NA
Total_exclusive	URA3	467600	NA
Total_exclusive	AEP1	80635	NA
Total_exclusive	SAY1	833150	NA
Total_exclusive	PDC2	127450	NA
Total_exclusive	RPC25	1541900	NA
Total_exclusive	VPS33	2160500	NA
Total_exclusive	VTC1	4387800	NA
Total_exclusive	MMS4	1684900	NA
Total_exclusive	SLM4	2447900	NA
Total_exclusive	AIM19	2214500	NA
Total_exclusive	NPR1	980480	NA
Total_exclusive	AIM6	55146	NA
Total_exclusive	ERG24	1780500	NA
Total_exclusive	SPT3	607520	NA
Total_exclusive	KAP114	122710	NA
Total_exclusive	AVT7	803400	NA
Total_exclusive	UTP14	110090	NA
Total_exclusive	UFO1	254510	NA
Total_exclusive	TFC7	156910	NA
Total_exclusive	ALO1	167280	NA
Total_exclusive	NOP53	1288800	NA
Total_exclusive	MRPL33	1466100	NA
Total_exclusive	NRP1	4448200	NA
Total_exclusive	PRI2	277780	NA
Total_exclusive	PFY1	4522200	NA
Total_exclusive	SAL1	303570	NA
Total_exclusive	AIM36	463600	NA
Total_exclusive	SET2	58190	NA
Total_exclusive	SEC24	508050	NA
Total_exclusive	YSC83	1085400	NA
Total_exclusive	RRP17	204300	NA
Total_exclusive	NIF3	291910	NA
Total_exclusive	VAN1	196920	NA
Total_exclusive	ZUO1	571750	NA
Total_exclusive	OYE2	206610	NA
Total_exclusive	ARO4	986230	NA
Total_exclusive	SAP190	248050	NA
Total_exclusive	QCR7	504860	NA
Total_exclusive	ECM25	848170	NA
Total_exclusive	NAM2	138770	NA
Total_exclusive	NCS2	180230	NA
Total_exclusive	GPT2	97665	NA
Total_exclusive	RAM2	154200	NA
Total_exclusive	HDA3	201410	NA
Total_exclusive	JIP5	466420	NA
Total_exclusive	RPN10	1174200	NA
Total_exclusive	YEA6	188780	NA
Total_exclusive	ARP1	630540	NA
Total_exclusive	DPH2	1261500	NA
Total_exclusive	PRP39	108220	NA
Total_exclusive	APL3	39474	NA
Total_exclusive	PRP31	318160	NA
Total_exclusive	MPH1	395730	NA
Total_exclusive	DMA1	1577900	NA
Total_exclusive	STU2	139180	NA
Total_exclusive	KIC1	168380	NA
Total_exclusive	PHS1	2815500	NA
Total_exclusive	IKI1	683530	NA
Total_exclusive	NSE5	178940	NA
Total_exclusive	NUC1	395820	NA
Total_exclusive	GRX1	554350	NA
Total_exclusive	NBP2	374030	NA
Total_exclusive	ADP1	149760	NA
Total_exclusive	STE20	158390	NA
Total_exclusive	LPL1	152670	NA
Total_exclusive	PIF1	137800	NA
Total_exclusive	PGA2	2726000	NA
Total_exclusive	ORC2	60956	NA
Total_exclusive	RIT1	278930	NA
Total_exclusive	SWC4	236470	NA
Total_exclusive	FTH1	380250	NA
Total_exclusive	VPS21	245320	NA
Total_exclusive	BRN1	47718	NA
Total_exclusive	MAM3	491540	NA
Total_exclusive	GEM1	324150	NA
Total_exclusive	PSP1	18443	NA
Total_exclusive	VNX1	233840	NA
Total_exclusive	CDC11	747390	NA
Total_exclusive	OPT1	687400	NA
Total_exclusive	ORC4	259410	NA
Total_exclusive	DYN1	8800.1	NA
Total_exclusive	EAF3	1460900	NA
Total_exclusive	PRB1	225140	NA
Total_exclusive	CIT1	136190	NA
Total_exclusive	GRX6	194760	NA
Total_exclusive	PTC7	327750	NA
Total_exclusive	RKI1	575850	NA
Total_exclusive	NAS6	164650	NA
Detected_in_both	FAS2	517530000	2067600000
Detected_in_both	FAS1	502980000	1038100000
Detected_in_both	RPL3	4004000000	18194000000
Detected_in_both	RPS1B	8354800000	3880700000
Detected_in_both	URA2	176220000	84182000
Detected_in_both	PMA1	1199900000	2149800000
Detected_in_both	ASC1	7288800000	11212000000
Detected_in_both	RPL23A	4866300000	2080600000
Detected_in_both	NAM7	1304700000	620640000
Detected_in_both	GCN1	76828000	31727000
Detected_in_both	RPL4A	14498000000	3504700000
Detected_in_both	PFK1	376300000	814860000
Detected_in_both	ACC1	64888000	57207000
Detected_in_both	ARO1	138460000	153950000
Detected_in_both	CDC19	1648500000	4477600000
Detected_in_both	PDC1	780270000	38094000
Detected_in_both	DED1	553100000	157600000
[truncated: 111 more rows]
