# Supplementary material
Source: HighWire-hosted journal article supplement (doi:10.1101/rna.079416.122)
Supplement: Supplemental_Table_S3.xlsx [file Supplemental_Table_S3.xlsx]

## Sheet: FLAG-UPF1 (-CHX)
logFC	AveExpr	t	P.Value	adj.P.Val	B	Protein
-4.15113	24.4287	-10.9628	6.70966e-05	0.0105296	2.47931	DBP2
3.06775	30.1444	10.0515	0.000105296	0.0105296	2.07415	NAM7
-2.30222	22.9938	-7.94653	0.000350076	0.0169075	0.926876	SSC1
-3.6573	25.8775	-7.86365	0.000369065	0.0169075	0.874509	NOP1
-2.75418	29.0035	-7.15958	0.000589923	0.0169075	0.403591	RPL36A
-2.39124	25.3634	-7.08516	0.000621299	0.0169075	0.350949	FPR3
-2.20383	28.6714	-6.9546	0.000681187	0.0169075	0.257186	RPL18A
-2.90513	23.9808	-6.72309	0.000804781	0.0169075	0.0864329	BRX1
2.14646	25.1689	6.70316	0.000816599	0.0169075	0.071452	ACT1
-1.94212	23.8126	-6.53886	0.000922092	0.0169075	-0.053713	DBP3
2.03909	25.6844	6.52756	0.000929915	0.0169075	-0.0624355	TY1B-JR1
-1.86001	22.4418	-5.93895	0.00146865	0.0206479	-0.537892	MAK16
1.80065	25.6865	5.92837	0.00148124	0.0206479	-0.546833	TUB3
-2.5006	24.4234	-5.91364	0.00149897	0.0206479	-0.559299	PDA1
-1.98938	29.1403	-5.87347	0.00154859	0.0206479	-0.59345	RPL38
1.65204	22.544	5.55003	0.00202582	0.0239933	-0.876196	PRS3
-2.18805	27.6048	-5.49546	0.00212219	0.0239933	-0.925295	RPP2B
-2.09339	30.8161	-5.47515	0.0021594	0.0239933	-0.943672	RPS17A
-1.50356	29.3319	-5.25169	0.00262295	0.02761	-1.14972	RPL34B
-3.8683	28.6011	-5.18504	0.00278281	0.0278281	-1.21257	RPS28A
-1.71907	29.7952	-5.02961	0.0032013	0.0292949	-1.36164	RPS9B
2.05152	27.5569	5.01206	0.00325297	0.0292949	-1.37869	SAM1
-2.0367	29.6834	-4.97382	0.00336891	0.0292949	-1.41602	RPL2B
-2.11438	21.5805	-4.83558	0.00382958	0.0316658	-1.55279	UTP10
1.47055	31.2271	4.80037	0.00395823	0.0316658	-1.58809	RPL11B
1.34359	27.0879	4.74221	0.00418182	0.0321678	-1.64682	VMA2
1.45953	27.8465	4.67811	0.0044452	0.0329274	-1.71215	TDH3
-1.69722	24.4391	-4.58667	0.00485459	0.0346756	-1.80646	OAC1
-1.40444	30.4966	-4.51742	0.00519353	0.0358174	-1.87876	RPL31A
-1.26938	23.8061	-4.43936	0.00560852	0.0373902	-1.96117	PAA1
2.47051	22.5222	4.20534	0.00709908	0.0458005	-2.21408	LEU1
-2.62314	25.4568	-4.13999	0.00759279	0.0474194	-2.28629	PDB1
1.37263	31.4784	4.11101	0.0078242	0.0474194	-2.31854	RPL25
1.13587	28.0334	4.06425	0.00821466	0.0483216	-2.37085	PDC1
1.15447	24.5816	4.01093	0.00868729	0.0496417	-2.43094	URA2
1.13261	28.7169	3.9534	0.0092321	0.0507052	-2.49629	CDC19
-1.40232	29.8968	-3.9384	0.00938047	0.0507052	-2.51342	RPL39
1.0791	26.5766	3.84619	0.0103542	0.0520845	-2.61952	MRT4
-1.25856	29.4203	-3.84532	0.010364	0.0520845	-2.62053	RPS10A
1.11462	23.5101	3.82261	0.0106213	0.0520845	-2.64687	CCT5
-2.70587	24.5208	-3.81775	0.0106773	0.0520845	-2.65252	NOG1
1.05912	27.4628	3.7721	0.0112199	0.0526972	-2.70576	YHR020W
1.03538	29.7977	3.76117	0.0113545	0.0526972	-2.71856	RPL10
1.30166	31.8167	3.74211	0.0115934	0.0526972	-2.74092	RPL6A
1.28017	31.6514	3.69756	0.0121745	0.0541089	-2.79343	RPL6B
-1.73067	29.3235	-3.65129	0.012813	0.0552955	-2.8483	RPL3
1.21584	25.7075	3.63861	0.0129944	0.0552955	-2.8634	TUB1
1.17617	22.5927	3.61641	0.0133192	0.0554967	-2.88989	TRP3
1.34722	22.2563	3.57659	0.0139249	0.0556993	-2.9376	RPT1
0.984728	30.9754	3.5693	0.0140392	0.0556993	-2.94636	RPL9A
-1.92932	24.2929	-3.55894	0.0142033	0.0556993	-2.95883	NOP58
-0.990241	30.497	-3.45263	0.0160181	0.0616082	-3.08773	RPL19B
1.02927	31.0969	3.42844	0.0164666	0.0621379	-3.11731	RPS11B
-2.03279	23.3499	-3.39102	0.0171882	0.0636599	-3.16324	PGK1
0.90434	31.8639	3.30206	0.01905	0.0692726	-3.27327	RPP0
0.991439	29.6605	3.28174	0.0195061	0.0696647	-3.29856	TEF1
0.894573	25.3382	3.2619	0.0199634	0.0700469	-3.32332	SAH1
-0.984366	29.9871	-3.19231	0.021664	0.0745462	-3.41062	RPL21A
-1.20554	29.816	-3.17962	0.0219911	0.0745462	-3.42661	RPL22A
-1.36293	24.5985	-3.135	0.023186	0.0772868	-3.48303	HSP60
1.0217	25.0457	3.07009	0.0250545	0.0821457	-3.56558	FAS2
-0.961452	29.6344	-3.01937	0.0266309	0.0859062	-3.63048	RPS19A
-2.17862	22.7262	-2.9933	0.0274833	0.0860018	-3.66396	FAA4
0.823551	25.8594	2.99218	0.0275206	0.0860018	-3.6654	ILV2
1.20624	21.8642	2.92623	0.0298185	0.0917491	-3.75051	ILV1
0.87677	25.3019	2.8994	0.030813	0.0933729	-3.78528	RPC40
1.4582	22.961	2.88372	0.031411	0.0937642	-3.80563	PRS1
-1.1535	23.5903	-2.84919	0.0327735	0.0951647	-3.85057	ENP1
0.782636	26.2683	2.82085	0.0339401	0.0951647	-3.88755	ENO2
-1.06163	27.534	-2.81119	0.034348	0.0951647	-3.90017	SSB1
1.34786	20.7648	2.80935	0.0344261	0.0951647	-3.90257	MCM6
0.88061	31.1231	2.80268	0.0347119	0.0951647	-3.9113	ASC1
-1.01111	22.5877	-2.80214	0.0347351	0.0951647	-3.912	GCN1
-0.805613	22.5949	-2.76352	0.0364415	0.0975201	-3.96261	CCT3
0.767986	26.8524	2.76069	0.03657	0.0975201	-3.96632	ATP2
-1.35057	26.6357	-2.72318	0.0383216	0.100846	-4.01561	MIR1
-2.53257	24.6734	-2.70916	0.039	0.101299	-4.03408	NUG1
0.762049	25.2599	2.69729	0.039584	0.101497	-4.04972	NOG2
-0.860415	29.6286	-2.67935	0.0404853	0.102495	-4.07339	RPS12
-0.921651	29.635	-2.65712	0.0416335	0.104084	-4.10276	RPL16B
0.800724	31.4581	2.63653	0.0427281	0.105501	-4.13	RPL8B
0.742379	26.0863	2.55999	0.0470791	0.114827	-4.23154	KAP123
-0.69804	31.0432	-2.51181	0.0500612	0.119212	-4.29565	RPL12A
-0.768796	30.8745	-2.50978	0.0501915	0.119212	-4.29836	RPS13
0.847772	22.9311	2.50243	0.0506652	0.119212	-4.30815	RPT3
0.840291	25.49	2.46678	0.0530329	0.121969	-4.3557	GFA1
-1.00188	29.1878	-2.4605	0.0534628	0.121969	-4.3641	RPS26B
-1.19737	24.8919	-2.45754	0.0536664	0.121969	-4.36805	PET9
-0.714947	30.3472	-2.44338	0.0546518	0.122813	-4.38696	RPS24A
0.737937	26.0169	2.40722	0.0572576	0.127239	-4.43529	IDH1
-0.892978	23.9659	-2.36298	0.0606272	0.131439	-4.49448	HXT7
-1.00303	23.382	-2.3516	0.0615283	0.131439	-4.50972	CDC48
0.700404	26.4538	2.34061	0.0624115	0.131439	-4.52444	APA1
0.68722	27.0253	2.33758	0.0626571	0.131439	-4.52849	ADH1
0.807435	25.9402	2.33658	0.0627389	0.131439	-4.52984	TEF4
-1.61125	20.8896	-2.33227	0.0630908	0.131439	-4.53561	CDC39
-1.77721	23.1951	-2.22744	0.0723288	0.149132	-4.67605	FKS1
0.622982	30.9376	2.20412	0.0745716	0.152187	-4.70729	RPL26B
-0.715027	27.4346	-2.14699	0.0803794	0.162383	-4.78377	SSA2
0.683198	31.7414	2.1307	0.0821211	0.163501	-4.80556	RPL27A
-0.707784	29.3028	-2.12658	0.082568	0.163501	-4.81107	RPL16A
0.745092	25.9325	2.11819	0.0834849	0.163507	-4.82228	IDH2
0.632364	31.0131	2.11166	0.0842062	0.163507	-4.83101	RPL1A
0.679393	31.4758	2.09048	0.0865911	0.165944	-4.8593	RPL20B
-0.601308	30.5756	-2.08586	0.0871206	0.165944	-4.86547	RPL23A
0.600721	30.8886	2.06567	0.0894748	0.16882	-4.89243	RPS20
1.10695	21.6143	2.04859	0.091517	0.17106	-4.9152	MCM4
-1.0507	24.066	-2.0293	0.0938818	0.173855	-4.9409	CCT4
0.618714	31.9307	2.01354	0.0958601	0.17589	-4.96187	RPL4A
-0.927668	23.4017	-1.99731	0.097943	0.178078	-4.98345	DPM1
0.676778	26.0241	1.98798	0.099161	0.178669	-4.99584	TUB2
0.552836	26.7677	1.96517	0.102206	0.181699	-5.02612	YHB1
-0.594585	22.2863	-1.96183	0.10266	0.181699	-5.03054	SCL1
-0.690828	31.3172	-1.94179	0.105426	0.184957	-5.05708	RPL28
0.622394	22.3616	1.9116	0.109737	0.190847	-5.09698	RPT2
-1.56013	22.6012	-1.8546	0.118372	0.203099	-5.17201	GDH1
0.902171	26.3105	1.84287	0.120233	0.203099	-5.1874	ATP1
-1.02958	24.8567	-1.84188	0.120391	0.203099	-5.18869	LAT1
0.504935	30.7678	1.83906	0.120844	0.203099	-5.19239	RPS14B
0.614649	30.5336	1.8053	0.126395	0.210659	-5.23654	RPS4A
-0.503611	30.8289	-1.76349	0.133625	0.220418	-5.29094	RPL7A
0.484133	24.4604	1.75883	0.134455	0.220418	-5.29698	MES1
-0.479179	29.3241	-1.73653	0.138502	0.225207	-5.32584	RPS25B
-0.516726	23.0271	-1.7231	0.140999	0.227418	-5.34318	PGI1
0.612802	21.8194	1.70291	0.144836	0.231242	-5.36917	MRN1
-0.482013	29.0876	-1.69853	0.145682	0.231242	-5.3748	RPS23B
0.480422	24.9459	1.69025	0.147293	0.231958	-5.38542	PFK1
0.941057	22.0877	1.67651	0.150009	0.23439	-5.40302	SEC18
0.686802	23.1729	1.6617	0.152989	0.234699	-5.42194	ACS2
-0.630342	21.8098	-1.66149	0.153033	0.234699	-5.42221	THS1
0.700693	26.673	1.65808	0.153728	0.234699	-5.42656	PSA1
-0.534161	29.7408	-1.62125	0.16143	0.244591	-5.47334	RPL32
-0.430557	24.3736	-1.55066	0.177258	0.266553	-5.56201	YTM1
-0.470139	30.3795	-1.51062	0.18689	0.278452	-5.61166	RPS16B
-0.447809	31.3004	-1.50631	0.187955	0.278452	-5.61697	RPS18A
-0.546716	26.5578	-1.49853	0.189893	0.279255	-5.62654	RPP2A
-0.423435	22.2864	-1.46777	0.197749	0.288685	-5.66421	HOM2
0.580249	23.6106	1.46112	0.199487	0.289111	-5.67231	RPT6
0.409635	31.2438	1.42565	0.209003	0.300723	-5.71525	RPS1B
-0.879503	24.8088	-1.3808	0.221641	0.31663	-5.76885	FAS1
0.427526	23.7354	1.37218	0.224153	0.317948	-5.77908	PGA3
0.449793	31.164	1.34336	0.232732	0.327791	-5.81299	RPS5
0.399841	24.8909	1.28423	0.251285	0.349199	-5.88146	CCT8
-0.714007	29.11	-1.28381	0.251423	0.349199	-5.88195	RPS15
0.393683	24.4975	1.27094	0.255637	0.352603	-5.89664	SRP68
-0.789153	22.3182	-1.21626	0.274251	0.375686	-5.95814	SXM1
-0.321109	24.3218	-1.15131	0.297912	0.40278	-6.0292	HSC82
0.457106	30.7152	1.15093	0.298057	0.40278	-6.02961	RPL5
0.428621	23.8811	1.14278	0.301147	0.404224	-6.03836	RVB2
0.315519	31.2999	1.11962	0.310088	0.41345	-6.06303	RPS8B
0.331359	24.6355	1.10728	0.314941	0.41714	-6.07604	KAP95
0.316411	30.8675	1.05505	0.336203	0.442372	-6.1301	RPL14B
0.449256	22.3977	1.0432	0.341193	0.443617	-6.14213	SDH1
-0.435811	26.7994	-1.04227	0.341585	0.443617	-6.14307	DED1
-0.526336	21.9224	-1.03553	0.344455	0.444458	-6.14987	SEC26
-0.686458	21.5455	-0.962394	0.376853	0.480487	-6.22171	RPB2
-0.289012	21.9406	-0.961677	0.377182	0.480487	-6.2224	CCT7
-0.303494	22.2343	-0.930067	0.391932	0.496117	-6.25229	KAP104
-0.416737	20.8795	-0.921442	0.396035	0.498157	-6.26032	GLT1
-0.397687	23.9383	-0.885742	0.413374	0.516717	-6.29299	SRP72
-0.244712	31.0645	-0.867615	0.422398	0.524718	-6.30921	RPL35B
-0.447293	21.5671	-0.835208	0.438903	0.541856	-6.33757	PTR2
-0.537384	22.4845	-0.82674	0.443294	0.543919	-6.34484	SEC27
0.222817	29.9684	0.806372	0.453989	0.553645	-6.36211	RPS7B
0.556352	20.7481	0.780477	0.467856	0.567099	-6.38356	RPN1
-0.334123	20.9936	-0.764685	0.476462	0.57405	-6.39638	MET10
0.429524	23.0925	0.746026	0.486773	0.582962	-6.41125	GCD6
0.293661	22.0013	0.722363	0.500073	0.595326	-6.42967	KRS1
0.210837	23.8483	0.662385	0.53489	0.633006	-6.47416	ARO1
-0.250864	27.9305	-0.650619	0.541903	0.637533	-6.48251	RPS29B
0.234176	25.0963	0.644767	0.545414	0.637911	-6.48661	YEF3
-0.21058	23.5805	-0.60284	0.570988	0.663939	-6.51508	CRM1
-0.2016	30.347	-0.59344	0.576822	0.666846	-6.52123	RPS6B
0.165974	30.5064	0.572889	0.589704	0.67782	-6.53439	RPS7A
0.264932	25.1723	0.558939	0.598545	0.684051	-6.54308	URA7
-0.181401	31.2459	-0.535656	0.613473	0.697129	-6.55717	RPL17A
-0.151246	26.1262	-0.515107	0.626824	0.706875	-6.56916	EFT1
0.148645	23.8695	0.5116	0.629119	0.706875	-6.57116	GCD7
-0.225598	23.2409	-0.479371	0.650423	0.724726	-6.58899	CCT6
0.170678	22.1792	0.476628	0.652253	0.724726	-6.59046	MSS51
0.226845	24.8999	0.468032	0.658008	0.727081	-6.59501	FBA1
0.194957	22.5664	0.437537	0.678635	0.745753	-6.61054	PFK2
0.143145	29.3076	0.401266	0.703581	0.768941	-6.62774	RPS31
-0.264175	24.0966	-0.386466	0.713883	0.775959	-6.63435	MAE1
0.0981947	24.7656	0.336897	0.748869	0.809588	-6.65479	KAR2
0.135359	20.4617	0.310058	0.768104	0.825918	-6.66473	TRP2
-0.0860219	30.3066	-0.298296	0.776593	0.83042	-6.66884	RPL24B
-0.0947015	22.8315	-0.292768	0.780595	0.83042	-6.67072	PRT1
-0.0988582	29.195	-0.286513	0.785132	0.830827	-6.6728	PMA1
-0.0892632	30.1506	-0.242046	0.817652	0.860686	-6.68635	RPL33A
0.0711906	24.2217	0.200295	0.848561	0.888545	-6.69703	VMA1
0.0501202	30.1577	0.179499	0.864074	0.900078	-6.70161	RPL30
-0.0741807	30.0414	-0.156159	0.881567	0.913541	-6.70616	RPS22A
0.0626675	23.0958	0.147771	0.887873	0.915333	-6.70764	RPG1
0.0370718	31.1614	0.0991755	0.924569	0.948276	-6.71463	RPS3
-0.0302779	26.694	-0.0868857	0.933886	0.952945	-6.71596	GPM1
0.0172813	22.9454	0.0599269	0.954364	0.968898	-6.71827	RNA1
0.0187061	23.3714	0.0281346	0.978563	0.987907	-6.71991	LCB1
-0.00607145	31.1692	-0.0207301	0.984204	0.987907	-6.72012	RPS0A
0.00878162	25.1104	0.0158694	0.987907	0.987907	-6.72022	RVB1

## Sheet: FLAG-UPF1 (+CHX)
logFC	AveExpr	t	P.Value	adj.P.Val	B	Protein
-4.91488	27.5663	-19.2075	5.73226e-05	0.00906862	2.6996	RPS2
-4.61844	25.3857	-16.6385	9.91106e-05	0.00906862	2.29035	NOP1
-2.81413	27.7783	-10.317	0.000603272	0.0261235	0.64438	HHF1
-4.21112	28.4611	-9.15878	0.000940175	0.0261235	0.184713	RPL36A
-2.29573	29.3934	-9.03358	0.000989425	0.0261235	0.130745	RPL38
2.5578	30.184	8.60165	0.00118611	0.0261235	-0.0625221	NAM7
-2.38268	22.7906	-8.58057	0.0011969	0.0261235	-0.0722435	FAA4
-2.95541	23.0991	-8.29602	0.00135539	0.0261235	-0.206279	PGK1
-2.51195	28.8399	-8.29369	0.0013568	0.0261235	-0.207397	RPL18A
-3.69763	24.2228	-8.17996	0.00142751	0.0261235	-0.262471	NUG1
-2.44788	23.969	-7.93524	0.00159597	0.0265511	-0.383981	HSP60
-2.2651	28.0476	-7.44276	0.00201718	0.0287466	-0.641634	RPS21B
-2.38807	27.4038	-7.4177	0.00204211	0.0287466	-0.655236	RPP2B
-1.85926	29.2623	-7.04913	0.00245734	0.032121	-0.86117	RPS28A
-2.41032	23.113	-6.33215	0.00361425	0.0424329	-1.29573	CCT4
1.5882	31.4196	6.28594	0.00370998	0.0424329	-1.3254	RPL11B
-1.94651	24.677	-5.88239	0.00469504	0.0505407	-1.59383	PET9
-3.21718	24.087	-5.68332	0.00529995	0.0514193	-1.7327	OAC1
-2.08884	29.2316	-5.67156	0.00533862	0.0514193	-1.74104	RPL3
-4.01056	25.5465	-5.45653	0.00611109	0.0559165	-1.89642	YDJ1
-1.69964	23.2953	-5.29079	0.00680225	0.0587168	-2.01994	ERG27
-2.54171	29.1861	-5.21471	0.00715164	0.0587168	-2.07777	RPL13B
-1.62056	21.2651	-5.16748	0.00737971	0.0587168	-2.11404	CLU1
-1.61457	26.9057	-4.80713	0.00944944	0.0687281	-2.40033	SSA2
-1.65467	23.299	-4.75005	0.00983965	0.0687281	-2.44728	SRP72
-2.19671	23.1013	-4.72743	0.00999969	0.0687281	-2.466	DPM1
1.21023	31.8759	4.68602	0.0103011	0.0687281	-2.50048	RPL6A
1.20138	31.6651	4.65743	0.0105158	0.0687281	-2.52443	RPL6B
-1.26792	29.2021	-4.60149	0.0109517	0.069109	-2.5716	RPS12
-1.44515	30.8674	-4.45098	0.0122392	0.0746592	-2.70079	RPS17A
-1.48094	29.3861	-4.39434	0.0127712	0.0747774	-2.75026	RPL34B
1.1094	31.0985	4.36319	0.0130758	0.0747774	-2.77767	RPS11B
-1.47222	30.3259	-4.31405	0.0135745	0.0752768	-2.82121	RPL19B
-2.92242	21.4128	-4.13232	0.0156322	0.0831814	-2.98541	COP1
-1.75747	29.8362	-4.1101	0.015909	0.0831814	-3.00584	RPL21A
-1.4979	30.4741	-4.05258	0.0166538	0.0846569	-3.05907	RPL31A
-1.05717	23.8599	-3.99155	0.017491	0.0850563	-3.11613	MAE1
-1.16098	30.0577	-3.97951	0.017662	0.0850563	-3.12745	RPL39
-2.1078	22.6085	-3.91093	0.0186763	0.0876348	-3.19241	CDC48
0.959481	29.6506	3.80514	0.0203827	0.0907419	-3.29408	RPL10
-2.61862	29.8102	-3.77511	0.020901	0.0907419	-3.32328	RPL15A
-2.49988	22.1854	-3.77211	0.0209537	0.0907419	-3.32621	UTP10
-1.64424	27.4636	-3.75138	0.0213219	0.0907419	-3.34645	RPL43B
-1.30793	26.6632	-3.70161	0.0222383	0.0919373	-3.39535	DED1
-1.76755	24.771	-3.66654	0.0229127	0.0919373	-3.43006	LAT1
-2.39891	26.3233	-3.62217	0.0238013	0.0919373	-3.47424	MIR1
-3.39404	24.3498	-3.62045	0.0238366	0.0919373	-3.47596	NOG1
-1.63572	25.9241	-3.60087	0.0242428	0.0919373	-3.49558	GPM1
-1.87462	23.5406	-3.58317	0.0246171	0.0919373	-3.51337	ENP1
-0.957302	22.6271	-3.52186	0.0259682	0.0950437	-3.57537	SEC27
-1.18909	29.9912	-3.45464	0.0275533	0.0988677	-3.64406	RPS9B
-0.855272	30.4817	-3.39574	0.0290383	0.102193	-3.70488	RPL23A
-2.74395	24.0958	-3.36824	0.0297641	0.10277	-3.73346	NOP58
-2.41136	23.8231	-3.32307	0.0310043	0.10363	-3.7807	DBP3
1.32378	31.6007	3.30163	0.0316145	0.10363	-3.80325	RPS5
-2.2904	23.1599	-3.29825	0.0317119	0.10363	-3.8068	FKS1
0.82421	31.2434	3.20565	0.0345277	0.110852	-3.90509	ASC1
-2.677	22.2225	-3.11086	0.0377234	0.119024	-4.00717	GCN1
0.864525	30.6517	3.09176	0.0384089	0.119133	-4.02791	RPS14B
-0.798623	31.0582	-3.0394	0.0403659	0.123116	-4.0851	RPS27A
-0.759455	25.0419	-2.91032	0.0457148	0.137144	-4.22795	FAS1
-1.21665	24.4447	-2.84144	0.0489088	0.14436	-4.30526	RVB1
-0.974036	29.7881	-2.76894	0.0525572	0.152666	-4.38741	RPL16B
-1.69875	22.5207	-2.59198	0.0628784	0.179793	-4.59118	SXM1
-0.687128	29.516	-2.49457	0.0695556	0.194948	-4.70516	RPL16A
-1.10777	22.4789	-2.47936	0.0706698	0.194948	-4.72306	SEC26
-0.875458	27.5346	-2.46989	0.0713742	0.194948	-4.73423	SSB1
0.625314	31.7619	2.42696	0.0746704	0.200951	-4.78496	RPL27A
0.611529	30.9113	2.40045	0.076793	0.203668	-4.8164	RPL26B
-1.27223	25.7056	-2.38178	0.078329	0.204774	-4.83859	EFT1
-1.60031	23.9998	-2.3679	0.0794942	0.204894	-4.85511	ERB1
-0.68722	31.203	-2.34645	0.0813337	0.204905	-4.88068	RPL28
-1.01188	24.0364	-2.34181	0.0817381	0.204905	-4.88622	CIC1
-0.635439	24.4839	-2.28211	0.0871479	0.212095	-4.95765	YTM1
-1.38191	26.7556	-2.27603	0.0877211	0.212095	-4.96494	TIF6
-1.19433	22.9421	-2.27221	0.0880833	0.212095	-4.96952	RVB2
0.613321	31.2449	2.25512	0.0897261	0.213245	-4.99005	RPS8B
0.774617	31.1192	2.20497	0.0947484	0.222294	-5.0504	RPL9A
-0.549064	29.2501	-2.19058	0.0962476	0.222953	-5.06776	RPS25B
0.955137	27.0786	2.17554	0.0978434	0.223817	-5.08592	SAM1
-0.939992	28.8131	-2.14685	0.10097	0.225551	-5.12059	PMA1
-1.70371	22.5392	-2.13767	0.101994	0.225551	-5.1317	NAN1
-0.652842	29.5569	-2.13496	0.102299	0.225551	-5.13498	RPS19A
-1.44788	29.3205	-2.11068	0.105073	0.228909	-5.16438	RPL2B
0.558396	30.0391	2.0683	0.110119	0.236613	-5.21578	RPS7B
-1.96782	21.9997	-2.05954	0.111195	0.236613	-5.22641	CCT3
0.613974	30.8361	2.04297	0.113263	0.238243	-5.24653	RPS20
-0.630119	29.4956	-2.00675	0.117933	0.243002	-5.29054	RPS10A
0.739642	30.18	1.99868	0.119002	0.243002	-5.30034	RPS22A
0.584585	30.6243	1.99488	0.119509	0.243002	-5.30496	RPS7A
0.501852	30.5111	1.91785	0.130322	0.260384	-5.39865	RPS4A
-0.801822	27.0558	-1.91391	0.130903	0.260384	-5.40345	RPS30B
-0.660798	23.3772	-1.89328	0.133994	0.263665	-5.42854	CRM1
-0.69317	31.0471	-1.88302	0.13556	0.263909	-5.44102	RPL12A
-1.52594	23.6542	-1.84955	0.14081	0.271244	-5.48171	SAH1
-0.921334	25.5176	-1.82285	0.145157	0.276705	-5.51415	YEF3
0.521091	30.7901	1.79408	0.150003	0.282995	-5.54906	RPL1A
0.669202	31.3843	1.72446	0.162465	0.303378	-5.63337	RPL25
-0.72572	22.3648	-1.51528	0.206954	0.381571	-5.88362	MSS51
-0.607138	24.2986	-1.48167	0.21521	0.381571	-5.9232	CCT8
-1.04888	23.0447	-1.48076	0.215437	0.381571	-5.92426	NIP1
-1.5541	24.4425	-1.47333	0.217309	0.381571	-5.93298	IDH1
0.709173	27.3372	1.47228	0.217574	0.381571	-5.9342	TDH3
-0.833622	20.6118	-1.46992	0.218173	0.381571	-5.93697	MCM5
0.70017	25.315	1.46693	0.218934	0.381571	-5.94047	TUB3
-0.377354	29.5181	-1.45264	0.222609	0.384315	-5.95718	RPS26B
-1.13845	23.3443	-1.43873	0.226244	0.386942	-5.97339	ARO1
-1.26397	24.7642	-1.41611	0.232287	0.393598	-5.99967	IDH2
0.457962	31.582	1.39107	0.239165	0.400923	-6.0286	RPL20B
0.362935	31.6458	1.38454	0.240992	0.400923	-6.03612	RPP0
-0.742036	23.1875	-1.36787	0.245721	0.405108	-6.05526	TIF34
-0.907562	24.2579	-1.3217	0.259301	0.421342	-6.10785	FBA1
-1.20721	25.7998	-1.31881	0.260173	0.421342	-6.11112	YHB1
0.430506	31.1945	1.30237	0.265204	0.425723	-6.12968	RPL17A
-0.410587	29.8943	-1.28487	0.270661	0.429154	-6.14933	RPL22A
-1.50778	24.5748	-1.28053	0.272032	0.429154	-6.15418	URA7
0.411281	31.9817	1.25288	0.28092	0.439388	-6.18497	RPL4A
-0.574918	23.5846	-1.22104	0.291504	0.44826	-6.22008	RPG1
0.346664	24.5032	1.21814	0.292486	0.44826	-6.22325	ACT1
-1.13054	20.1713	-1.21386	0.293941	0.44826	-6.22793	GLT1
-0.374651	24.1394	-1.14423	0.318617	0.481875	-6.30308	SRP68
0.291669	31.1979	1.07686	0.344316	0.516474	-6.3737	RPS1B
-0.750365	22.9425	-1.04909	0.355447	0.528836	-6.40215	RNA1
-0.303324	22.9519	-1.04148	0.358556	0.529159	-6.40988	GCD6
-0.992138	26.2722	-1.03256	0.362228	0.530301	-6.41889	APA1
-0.328848	29.139	-0.9215	0.410805	0.596645	-6.52728	RPS23B
-0.228382	30.3934	-0.882791	0.428998	0.616107	-6.56323	RPS24A
0.488763	25.5805	0.878745	0.430938	0.616107	-6.56693	TUB1
-0.41449	23.965	-0.855981	0.441987	0.624334	-6.58754	VMA1
-0.300373	26.7859	-0.852867	0.443516	0.624334	-6.59033	ATP2
-0.88571	25.0971	-0.839813	0.449974	0.62859	-6.60195	TEF4
0.212264	24.9014	0.819366	0.460242	0.633328	-6.61991	FAS2
-0.277608	24.7803	-0.819277	0.460288	0.633328	-6.61999	NOG2
-0.65854	23.2206	-0.798429	0.470949	0.641972	-6.63797	PRT1
-0.914427	22.6424	-0.793331	0.473586	0.641972	-6.64232	PRE10
-0.619997	24.3625	-0.776075	0.482596	0.646103	-6.65689	PFK1
-0.221317	25.1435	-0.772826	0.484307	0.646103	-6.65961	TY1B-JR1
-0.385593	22.3363	-0.767307	0.487225	0.646103	-6.6642	ACS2
0.203527	30.0823	0.755095	0.493729	0.650018	-6.67429	RPL33A
-0.175541	31.068	-0.693984	0.527267	0.686858	-6.72291	RPS13
0.224214	31.2292	0.690519	0.529218	0.686858	-6.72557	RPL7A
-0.197848	31.06	-0.677997	0.536312	0.691163	-6.73511	RPL35B
-0.456369	24.0746	-0.632481	0.562667	0.720056	-6.7686	KAP95
-0.359602	25.7987	-0.58843	0.589011	0.73881	-6.79921	ENO2
0.1715	29.2897	0.582858	0.592401	0.73881	-6.80296	RPS31
0.320943	21.1744	0.582311	0.592734	0.73881	-6.80332	RPN1
-0.265772	25.9286	-0.581105	0.59347	0.73881	-6.80413	ATP1
-0.211875	22.3035	-0.557398	0.608052	0.751849	-6.81967	KAP104
0.139916	31.2673	0.52913	0.625735	0.76852	-6.83748	RPS3
-0.17158	30.3011	-0.514756	0.634847	0.774514	-6.84623	RPL30
-0.85709	22.2149	-0.498171	0.64546	0.782246	-6.85606	PSE1
-0.340562	24.6713	-0.478953	0.657888	0.788748	-6.8671	MES1
-0.332429	21.0289	-0.476561	0.659445	0.788748	-6.86845	MCM4
-0.124106	29.8341	-0.468369	0.664791	0.789979	-6.87302	RPL32
-0.255133	25.8123	-0.456588	0.672524	0.793274	-6.87947	KAP123
0.124201	31.5797	0.450963	0.676233	0.793274	-6.88249	RPS18A
-0.353089	20.218	-0.442252	0.682	0.794942	-6.88711	MCM6
-0.243982	27.7294	-0.432558	0.688449	0.79738	-6.89216	RPS29B
0.0998476	31.2807	0.399644	0.710584	0.811852	-6.90853	RPS0A
0.169398	30.5163	0.398356	0.711457	0.811852	-6.90914	RPS6B
-0.214691	25.9568	-0.394241	0.714252	0.811852	-6.9111	TUB2
-0.165713	25.0733	-0.375337	0.72716	0.817283	-6.91985	GFA1
-0.104513	30.5657	-0.374166	0.727963	0.817283	-6.92038	RPS16B
-0.210508	21.2704	-0.339334	0.752048	0.837438	-6.93541	RSM23
-0.202135	24.9045	-0.335005	0.755067	0.837438	-6.93718	HSC82
0.0953792	30.451	0.27311	0.798783	0.880586	-6.96013	RPL5
0.164106	24.7825	0.263252	0.805835	0.883041	-6.96337	RPC40
-0.0907485	23.8078	-0.218616	0.838041	0.908757	-6.97661	GCD7
-0.186958	25.4493	-0.216973	0.839235	0.908757	-6.97705	ILV2
-0.158716	26.4634	-0.209279	0.84483	0.909435	-6.97907	ADH1
0.0758393	28.1453	0.196395	0.854225	0.914171	-6.9823	CDC19
0.0558271	30.8805	0.183327	0.863785	0.919027	-6.98538	RPL14B
-0.0988878	29.4253	-0.156728	0.883329	0.934389	-6.99098	TEF1
-0.0759412	27.573	-0.143567	0.893038	0.936521	-6.99344	PDC1
0.0651263	27.1596	0.137198	0.897745	0.936521	-6.99455	YHR020W
0.0758281	24.2311	0.133207	0.900698	0.936521	-6.99522	URA2
0.20433	22.1282	0.118499	0.911594	0.942495	-6.99752	LEU1
0.0733963	26.2027	0.110577	0.917472	0.943244	-6.99865	MRT4
-0.0614336	22.6666	-0.0787785	0.941131	0.959433	-7.00241	CCT5
0.0359362	30.0263	0.0753262	0.943704	0.959433	-7.00274	RPL24B
-0.0263175	26.564	-0.04655	0.965185	0.97585	-7.00493	VMA2
0.0071246	31.222	0.0281032	0.978975	0.984354	-7.00579	RPL8B
0.000200769	29.4623	0.000499207	0.999626	0.999626	-7.00628	RPS15

## Sheet: FLAG-UPF1_UPF2_UPF3_EE
logFC	AveExpr	t	P.Value	adj.P.Val	B	Protein
-3.94902	25.1468	-19.0852	3.58292e-05	0.00676449	3.27746	CBF5
-3.73007	22.4378	-18.5419	4.03046e-05	0.00676449	3.17943	MAK21
3.8255	29.9265	16.8611	5.93376e-05	0.00676449	2.84475	NAM7
4.52227	27.0373	15.6647	8.00149e-05	0.00684127	2.57358	HTZ1
2.85049	22.5092	14.0462	0.00012447	0.00851376	2.1546	ILV1
-2.40824	22.3003	-12.6384	0.000190639	0.0104327	1.73182	RVB2
2.30811	24.9023	12.2874	0.000213535	0.0104327	1.61656	LCB2
-2.88265	28.2994	-11.8758	0.000244877	0.0104685	1.47596	RPP2B
2.3338	23.797	11.2197	0.000307586	0.010798	1.23858	RPT4
2.39543	23.8032	11.0886	0.000322411	0.010798	1.18908	RPB2
-2.22536	26.1512	-10.7395	0.000366421	0.010798	1.05372	MRT4
2.56673	23.2008	10.4149	0.000414185	0.010798	0.923044	MCX1
-3.01226	29.6084	-10.3285	0.000428173	0.010798	0.88745	RPL38
1.88416	27.4048	10.142	0.000460432	0.010798	0.809359	TUB2
2.20804	26.933	10.0704	0.000473594	0.010798	0.778966	IDH2
1.9677	28.0541	9.65366	0.000560231	0.0119061	0.596814	VMA2
1.72981	23.8662	9.43298	0.000614039	0.0119061	0.49668	CCT5
2.08023	27.0318	9.18942	0.000681035	0.0119061	0.383051	TY1B-ML2
1.72146	29.4522	9.15725	0.000690545	0.0119061	0.367792	TDH3
1.77659	26.7573	9.13817	0.000696263	0.0119061	0.358712	YHM2
1.79331	29.6656	9.00284	0.000738538	0.0120276	0.29371	CDC19
2.51755	21.5784	8.75117	0.000825911	0.0128392	0.169924	PUF4
1.65089	28.8093	8.52846	0.000914081	0.0130816	0.0571057	MIR1
2.48273	23.3694	8.44614	0.000949581	0.0130816	0.0146048	LEU1
1.73339	28.4329	8.3088	0.00101268	0.0130816	-0.0573043	YHR020W
1.95574	25.158	8.26162	0.00103554	0.0130816	-0.0822971	CRM1
1.55474	25.973	8.10728	0.00111488	0.0130816	-0.165117	MAE1
-1.87263	24.5406	-8.05653	0.0011426	0.0130816	-0.192716	HAS1
3.07524	23.0382	8.05631	0.00114272	0.0130816	-0.192835	SEC18
1.78284	27.3459	7.95754	0.00119914	0.0130816	-0.247065	YHB1
1.85808	24.0648	7.90987	0.0012276	0.0130816	-0.273493	RPT1
1.64325	25.929	7.82529	0.00128016	0.0130816	-0.320781	URA7
1.91489	26.4952	7.82301	0.00128162	0.0130816	-0.322065	ILV2
1.62696	25.4326	7.75285	0.00132739	0.0130816	-0.361704	URA2
2.15403	30.4347	7.64172	0.00140409	0.0130816	-0.425249	LEU2
-1.85365	24.8288	-7.58984	0.00144176	0.0130816	-0.455239	ERB1
1.838	26.7044	7.57764	0.0014508	0.0130816	-0.462323	IDH1
1.71426	24.2902	7.54876	0.00147248	0.0130816	-0.479134	TRP3
1.41965	27.2604	7.4693	0.0015342	0.0130816	-0.525726	KAP123
1.5331	26.0414	7.42717	0.0015682	0.0130816	-0.550626	RPC40
2.14956	26.5112	7.39275	0.00159669	0.0130816	-0.571084	TUB3
1.54024	23.7837	7.38105	0.00160651	0.0130816	-0.578056	SDH1
1.46388	27.0723	7.30737	0.00167011	0.0132832	-0.622228	NOG1
1.76518	28.0525	7.08608	0.00188064	0.0142904	-0.757588	SAM1
2.07828	24.0574	6.97741	0.00199593	0.0142904	-0.825585	RPT3
1.30403	28.6886	6.95274	0.0020233	0.0142904	-0.841165	DED1
1.52915	25.1779	6.92929	0.00204974	0.0142904	-0.856022	ETT1
1.52086	25.728	6.88783	0.00209753	0.0142904	-0.88241	ENP1
1.31848	24.186	6.88592	0.00209977	0.0142904	-0.883631	SXM1
1.37721	22.4315	6.86179	0.00212825	0.0142904	-0.899065	CHO2
2.01537	24.542	6.85946	0.00213102	0.0142904	-0.900554	RPT6
1.51736	22.3235	6.77927	0.0022293	0.0146468	-0.952237	RCM1
1.35101	29.5022	6.7283	0.00229467	0.0146468	-0.985391	PDC1
1.35249	24.3645	6.71458	0.00231266	0.0146468	-0.994354	LCB1
2.13651	24.1659	6.51236	0.00259904	0.0153642	-1.12853	RRP8
2.32096	23.036	6.46364	0.00267442	0.0153642	-1.16144	NMD5
1.44157	28.303	6.46022	0.00267981	0.0153642	-1.16376	UPF3
3.68761	24.0869	6.41331	0.00275512	0.0153642	-1.19568	NMD2
1.20309	22.6692	6.38774	0.00279726	0.0153642	-1.21317	CPA2
1.41078	23.6147	6.35944	0.00284483	0.0153642	-1.23261	SEC53
1.66475	25.3106	6.26425	0.00301223	0.0153642	-1.29856	ELO2
1.29269	26.3581	6.25945	0.00302099	0.0153642	-1.30191	PFK1
1.34411	27.4233	6.23886	0.00305891	0.0153642	-1.31631	NOP56
1.16976	30.803	6.23339	0.00306908	0.0153642	-1.32014	TEF1
1.53719	21.8991	6.23076	0.00307398	0.0153642	-1.32198	MCM6
1.47362	26.1505	6.22535	0.00308409	0.0153642	-1.32577	NOG2
1.59904	24.7206	6.20871	0.00311548	0.0153642	-1.33747	NIP1
1.41088	24.8534	6.19389	0.00314375	0.0153642	-1.3479	RPG1
1.13814	23.4875	6.19045	0.00315036	0.0153642	-1.35033	NOP9
3.09957	22.618	6.13726	0.00325474	0.0153642	-1.38798	EDC3
1.53839	25.8584	6.11178	0.00330624	0.0153642	-1.40613	CCT8
1.2907	28.1265	6.10677	0.00331648	0.0153642	-1.4097	ATP2
1.25315	27.8284	6.10664	0.00331675	0.0153642	-1.4098	ADH1
-1.22295	30.1051	-6.1029	0.00332441	0.0153642	-1.41246	RPS28A
1.48529	26.3404	5.90663	0.00375929	0.0171424	-1.55472	MES1
1.37924	25.2603	5.84508	0.00390977	0.0175939	-1.60019	RNA1
1.49153	24.1214	5.80136	0.00402112	0.0177198	-1.63275	PSE1
1.10688	24.8415	5.79357	0.00404136	0.0177198	-1.63856	RRP12
1.04814	24.3382	5.71016	0.00426614	0.0184686	-1.70134	GCN1
-1.66978	25.3413	-5.67843	0.00435561	0.0186202	-1.72543	RLP7
1.39703	25.1386	5.63144	0.00449238	0.0189678	-1.76132	VMA1
1.31651	24.0423	5.60563	0.00456973	0.0189785	-1.78114	GRS1
-1.10263	31.3865	-5.59374	0.00460589	0.0189785	-1.79029	RPS27A
2.088	26.5762	5.52543	0.00482064	0.0196269	-1.84322	TUB1
1.3122	24.6428	5.31005	0.00558223	0.0224603	-2.01377	GCD6
1.37217	24.7076	5.28556	0.0056778	0.0225142	-2.03352	RMT2
1.92987	22.9573	5.27276	0.00572858	0.0225142	-2.04388	MRN1
1.16109	24.6186	5.24542	0.00583881	0.0225142	-2.06606	SDA1
1.44678	24.403	5.22632	0.00591734	0.0225142	-2.08161	DPM1
1.44033	22.6624	5.20057	0.00602527	0.0225142	-2.10265	UBA4
1.28167	26.0354	5.19076	0.00606706	0.0225142	-2.1107	DBP3
1.25978	27.2447	5.18088	0.00610943	0.0225142	-2.1188	ATP1
1.2119	24.5365	5.1779	0.00612229	0.0225142	-2.12124	GCD2
-1.50949	24.876	-5.1519	0.00623589	0.022688	-2.14265	PGK1
1.65013	24.0815	5.13688	0.00630267	0.0226896	-2.15506	MIC60
1.20154	24.6729	5.05613	0.00667703	0.0237869	-2.22225	UTP10
1.89484	25.2215	4.86496	0.00767633	0.0263423	-2.38476	ERG27
1.18232	25.6914	4.85914	0.00770949	0.0263423	-2.38979	SRP68
-1.18328	24.9037	-4.85407	0.0077385	0.0263423	-2.39416	HSP60
-1.15527	30.3077	-4.85018	0.00776089	0.0263423	-2.39753	RPL22A
1.71236	25.8365	4.84696	0.00777946	0.0263423	-2.40031	ARO1
1.69712	25.2101	4.82949	0.00788114	0.026425	-2.41545	BMH1
1.21104	23.466	4.75683	0.00832176	0.0276315	-2.47886	POL5
1.54793	23.9642	4.68361	0.00879622	0.028926	-2.5435	KAP104
-0.926193	27.9417	-4.65841	0.00896706	0.029207	-2.56593	SSA2
1.20789	24.3783	4.64094	0.00908783	0.0293211	-2.58152	RRP3
0.925166	28.9388	4.58963	0.00945407	0.0297168	-2.62758	NOP1
2.57017	28.9738	4.57099	0.00959151	0.0297168	-2.64441	HHF1
1.65896	25.4245	4.56707	0.00962071	0.0297168	-2.64795	CCT4
1.23868	24.9658	4.5624	0.00965562	0.0297168	-2.65217	FAA4
1.15786	22.5783	4.55472	0.0097134	0.0297168	-2.65913	TIF4631
-1.11293	22.8014	-4.5259	0.00993401	0.0297168	-2.68531	NOP4
0.887145	27.0545	4.52059	0.00997531	0.0297168	-2.69014	YEF3
1.94704	25.6165	4.51312	0.0100338	0.0297168	-2.69695	GGC1
1.4656	26.4669	4.51101	0.0100503	0.0297168	-2.69888	GFA1
1.05076	24.4204	4.50733	0.0100794	0.0297168	-2.70224	TIF34
1.04983	25.0065	4.47372	0.010349	0.0299321	-2.73302	OAC1
-0.883013	29.2617	-4.46767	0.0103985	0.0299321	-2.73858	RPL43B
1.3912	24.5154	4.46566	0.010415	0.0299321	-2.74042	PGA3
0.987996	23.1324	4.41975	0.0108004	0.0307812	-2.78278	ERG1
1.20858	23.3355	4.31407	0.0117548	0.0332243	-2.88146	RIM2
1.24824	26.3546	4.25885	0.0122938	0.0344628	-2.93369	TEF4
1.26985	21.8735	4.24804	0.0124027	0.0344856	-2.94397	CEX1
0.987789	23.7413	4.22459	0.0126431	0.0348705	-2.96633	SYO1
-0.770241	30.8767	-4.17478	0.0131725	0.0360399	-3.0141	RPS16B
-0.871533	32.0419	-4.11106	0.0138889	0.0376985	-3.07576	RPL12A
0.913953	23.6772	4.10063	0.0140106	0.0377293	-3.08591	PUP2
-3.18877	24.7687	-4.04482	0.0146838	0.0392332	-3.14053	NMD3
1.05313	28.1117	4.03487	0.0148078	0.0392578	-3.15031	APA1
1.7579	21.43	3.98697	0.0154229	0.040574	-3.19766	KAP120
-0.777383	30.2326	-3.96594	0.0157024	0.0409941	-3.21854	RPS10A
0.99313	30.7534	3.88259	0.016872	0.0437137	-3.30205	PMA1
1.46826	24.3683	3.86163	0.0171822	0.0441828	-3.32322	GCN3
2.10546	22.0178	3.81034	0.0179706	0.0457867	-3.37533	MCM4
-1.08631	29.8493	-3.80383	0.0180737	0.0457867	-3.38197	RPS21B
2.65324	27.1511	3.78964	0.0183009	0.0460214	-3.39647	ACT1
-1.3145	22.1576	-3.68918	0.0200104	0.0499529	-3.50008	NOC3
0.768963	25.0936	3.67432	0.0202791	0.0500215	-3.51554	TIF1
1.72831	21.2491	3.66852	0.0203852	0.0500215	-3.52159	NAB6
-1.69915	22.5138	-3.65603	0.0206157	0.0500215	-3.53462	SAS10
-0.680342	30.4325	-3.65565	0.0206229	0.0500215	-3.53503	RPL32
0.943553	23.0868	3.624	0.0212214	0.0511107	-3.56817	CHA1
-0.850021	25.1414	-3.45814	0.0247161	0.0591112	-3.74454	CIC1
2.04839	24.3333	3.32075	0.0281345	0.0668195	-3.894	ACS2
0.946135	24.3028	3.29814	0.0287489	0.0678078	-3.91889	NAN1
1.0977	23.8005	3.27284	0.0294556	0.0686087	-3.94684	HMG1
1.75664	23.2194	3.27163	0.0294897	0.0686087	-3.94818	SUP45
-0.60897	31.769	-3.24898	0.0301405	0.0696489	-3.97329	RPL23A
-0.590285	31.6201	-3.21551	0.031133	0.0710107	-4.01055	RPL20B
-2.10329	25.3303	-3.21511	0.0311451	0.0710107	-4.01099	NOP7
0.942121	27.0895	3.20523	0.0314457	0.0710415	-4.02203	PET9
0.957287	23.3161	3.20104	0.031574	0.0710415	-4.02671	TRM5
1.52061	23.6487	3.14645	0.0333048	0.074446	-4.08799	ERG13
0.922443	23.6706	3.09719	0.0349625	0.0769569	-4.14368	HEM1
0.56973	32.01	3.09356	0.0350883	0.0769569	-4.14779	RPS1A
-0.688777	28.2841	-3.09313	0.0351031	0.0769569	-4.14828	SSB1
-0.592596	31.5541	-3.07989	0.0355671	0.0774773	-4.16332	RPS12
1.02805	21.6833	2.99518	0.0387113	0.0837927	-4.26021	MCM5
-0.74393	30.4993	-2.9823	0.0392167	0.0840846	-4.27503	RPL30
-2.2234	27.1293	-2.97925	0.0393378	0.0840846	-4.27855	RPP2A
1.41649	22.2373	2.96864	0.0397617	0.0840955	-4.29078	URB1
0.567962	26.319	2.96683	0.0398347	0.0840955	-4.29287	NOP58
1.29565	25.8946	2.95623	0.0402646	0.0844816	-4.30512	KAP95
0.596623	26.0379	2.8789	0.0435681	0.0906289	-4.39496	HSC82
0.947348	24.5508	2.87541	0.0437245	0.0906289	-4.39904	CCT6
-0.814879	30.4787	-2.85901	0.0444676	0.0916139	-4.4182	RPS19A
-0.546493	31.7938	-2.85018	0.0448738	0.091645	-4.42854	RPL35B
-0.783457	30.8101	-2.84706	0.0450186	0.091645	-4.4322	RPS22A
-0.556674	22.0029	-2.81637	0.0464699	0.0940397	-4.46824	CYS4
1.23705	25.0849	2.80849	0.0468515	0.0942541	-4.47752	GCD7
0.979262	23.8659	2.7916	0.0476807	0.0953614	-4.49742	SLC1
-1.41179	23.1228	-2.67696	0.0537795	0.106934	-4.63358	KRE33
0.677515	24.1733	2.63067	0.0564927	0.111679	-4.68905	PNO1
0.753656	22.7157	2.6167	0.0573415	0.112648	-4.70584	YMR310C
0.824744	20.4137	2.61182	0.0576418	0.112648	-4.71171	MSN5
1.37128	22.3494	2.56585	0.0605583	0.117523	-4.76717	GLT1
1.05625	24.2094	2.5618	0.0608234	0.117523	-4.77207	PRE5
0.586335	27.0553	2.54774	0.0617532	0.118649	-4.78908	NUG1
0.772922	23.8372	2.52644	0.0631929	0.120737	-4.81491	GCD1
2.06375	20.9615	2.49131	0.0656512	0.124737	-4.8576	YBP2
0.633066	24.5402	2.47281	0.0669895	0.126577	-4.88014	SSH1
-1.42212	28.0518	-2.44444	0.0691021	0.129851	-4.91478	RPL22B
-0.833168	24.5291	-2.41324	0.0715131	0.133648	-4.95297	SRO9
0.859673	21.8522	2.40297	0.072327	0.134434	-4.96555	TCB2
-0.444844	22.9733	-2.38162	0.0740531	0.136898	-4.99175	MRPS35
0.657492	31.462	2.35542	0.0762353	0.139375	-5.02396	RPL26B
0.480771	25.4279	2.35115	0.0765978	0.139375	-5.02922	PAA1
-0.520253	30.8125	-2.35094	0.0766154	0.139375	-5.02947	RPL39
0.661279	25.5492	2.32412	0.0789378	0.142812	-5.06253	BCP1
0.710579	27.4186	2.31426	0.0798106	0.142812	-5.07468	EFT1
1.3585	22.7363	2.31166	0.0800427	0.142812	-5.07789	UTP5
0.486248	22.6215	2.31018	0.0801752	0.142812	-5.07972	TRP2
0.655011	27.7851	2.26208	0.0846153	0.148276	-5.13917	GPM1
0.885245	25.2462	2.25742	0.0850599	0.148276	-5.14493	FKS1
-0.933309	21.9801	-2.25477	0.0853145	0.148276	-5.14822	COP1
-0.438994	22.4637	-2.25417	0.0853715	0.148276	-5.14896	GSF2
1.05743	23.7636	2.25377	0.0854103	0.148276	-5.14946	MSS51
0.450313	25.1054	2.23431	0.0873038	0.150798	-5.17357	SRP72
0.555371	27.2753	2.17451	0.0934214	0.160553	-5.24779	ENO2
1.41454	20.5404	2.09937	0.101789	0.17406	-5.34128	OSH3
0.435611	31.6723	2.04176	0.108763	0.18506	-5.41307	RPS6B
0.67794	19.4798	2.00931	0.112921	0.191183	-5.45352	MCM2
0.761677	26.7509	1.98648	0.115949	0.19478	-5.48198	OLA1
-0.366985	31.3824	-1.98473	0.116185	0.19478	-5.48417	RPS8B
0.665563	21.648	1.96377	0.119049	0.198608	-5.51029	RET1
0.647839	23.7729	1.89051	0.129677	0.215289	-5.60156	GSP1
-0.926985	31.3341	-1.8814	0.131068	0.216547	-5.61289	RPL21A
0.349748	32.2031	1.86839	0.133083	0.218814	-5.62908	RPS5
-0.919212	22.9819	-1.86319	0.133898	0.218814	-5.63554	PFK2
-0.351412	31.8721	-1.85407	0.135339	0.218814	-5.64687	RPL15A
-0.642283	23.39	-1.85405	0.135342	0.218814	-5.6469	GUS1
1.05497	21.1205	1.85219	0.135639	0.218814	-5.64922	MET18
0.958148	22.9324	1.83518	0.138378	0.222185	-5.67035	CDC28
2.15156	20.0196	1.81411	0.141853	0.2267	-5.69649	LYS4
0.337733	30.5256	1.77338	0.148838	0.236756	-5.74695	RPL16A
0.364923	25.9455	1.76748	0.14988	0.23731	-5.75425	FBA1
0.329255	32.113	1.75202	0.152645	0.238764	-5.77335	RPL7A
0.665478	25.0266	1.75075	0.152875	0.238764	-5.77493	SAH1
0.897671	20.028	1.75065	0.152893	0.238764	-5.77505	STT4
-0.350898	29.9082	-1.74675	0.1536	0.238779	-5.77986	RPS25B
0.444707	23.9193	1.73644	0.155488	0.240619	-5.79259	MRPS28
0.427187	32.2656	1.70765	0.160886	0.247815	-5.82806	RPS0B
-0.756604	22.919	-1.70399	0.161587	0.247815	-5.83257	UTP9
0.471761	22.936	1.69496	0.163327	0.249365	-5.84366	RPN1
0.749701	22.6362	1.67136	0.167971	0.255316	-5.87263	NAM9
-0.375213	31.124	-1.64405	0.173519	0.261822	-5.90607	RPS20
0.310025	32.3628	1.64277	0.173783	0.261822	-5.90762	RPP0
0.49901	21.7648	1.61897	0.178779	0.268169	-5.93666	UTP20
-0.477654	21.8896	-1.58899	0.185285	0.276713	-5.97311	PDR12
1.22921	23.9707	1.57628	0.188115	0.279719	-5.98851	REP1
0.66818	21.3505	1.55647	0.192614	0.285169	-6.01245	EMW1
1.07814	22.2843	1.5479	0.194597	0.286863	-6.0228	MET17
-0.316273	31.385	-1.54404	0.195495	0.28695	-6.02744	RPL9A
0.773064	21.9271	1.53772	0.196977	0.28765	-6.03505	CSE1
0.390853	21.9361	1.53484	0.197654	0.28765	-6.03851	ELP3
0.303238	22.4591	1.51719	0.201867	0.292537	-6.05972	TCB1
-0.289722	31.4149	-1.50952	0.203724	0.293981	-6.06889	RPL36B
-0.508424	23.8402	-1.49406	0.207524	0.298206	-6.08738	CDC48
1.13709	22.4459	1.48976	0.208592	0.298488	-6.09251	RPA135
-0.358143	31.2776	-1.48558	0.209636	0.298731	-6.09749	RPS11B
0.982476	23.2267	1.45977	0.216204	0.306685	-6.12817	ALD6
0.934831	22.9851	1.45666	0.217011	0.306685	-6.13186	CCT7
0.660224	22.6784	1.44671	0.219605	0.309074	-6.14363	CDC39
0.619012	25.596	1.44238	0.220746	0.309406	-6.14874	PSA1
0.851428	19.955	1.42692	0.224861	0.312961	-6.16696	DOP1
0.286203	31.7756	1.42382	0.225697	0.312961	-6.17062	RPS13
0.763581	23.8582	1.42176	0.226252	0.312961	-6.17303	YNR021W
0.273008	23.5446	1.41921	0.226942	0.312961	-6.17603	CCT3
0.307206	23.9816	1.36113	0.243246	0.334097	-6.24376	PRT1
0.890874	22.5233	1.34176	0.248934	0.340542	-6.26611	MET10
0.4829	19.1918	1.33713	0.250313	0.341064	-6.27144	MDN1
-0.375677	25.7782	-1.32115	0.255128	0.346245	-6.28976	FPR4
0.247324	30.6203	1.30998	0.258545	0.349496	-6.30251	RPL18A
0.294242	23.3264	1.29826	0.262183	0.353018	-6.31586	ILV5
1.26142	22.1986	1.2898	0.264836	0.353871	-6.32545	SPB4
0.685278	21.1582	1.28964	0.264886	0.353871	-6.32563	ILS1
-0.230206	29.8587	-1.23278	0.283406	0.377139	-6.38941	RPS23B
-0.218159	31.4996	-1.18604	0.29954	0.397065	-6.44086	RPL6B
-1.27031	23.6343	-1.17027	0.305175	0.402973	-6.458	VPH1
0.712488	21.4069	1.16296	0.30782	0.404901	-6.46591	SEC7
0.267618	25.227	1.14505	0.314388	0.411957	-6.48517	KAR2
0.311452	22.9227	1.1318	0.319329	0.412921	-6.49932	DIM1
0.426713	21.6249	1.13143	0.319469	0.412921	-6.49972	MET6
0.59224	21.2798	1.12878	0.320467	0.412921	-6.50254	CTR86
-0.252587	21.583	-1.1284	0.320608	0.412921	-6.50294	CHC1
-0.256517	31.2834	-1.12694	0.321161	0.412921	-6.5045	RPS2
0.421606	23.8406	1.1102	0.327538	0.419543	-6.52221	TOM70
0.218831	31.8868	1.10538	0.329394	0.420346	-6.52728	RPS3
-0.250977	31.7015	-1.10125	0.330994	0.420818	-6.53163	RPL6A
0.221819	31.5362	1.0745	0.341522	0.432595	-6.55951	RPL11A
0.812874	25.3598	1.06388	0.345786	0.43638	-6.57049	HXT3
0.239197	22.8352	1.04524	0.353381	0.444324	-6.58958	ACC1
-0.242721	32.1078	-1.0343	0.357907	0.448367	-6.6007	RPL28
-0.306688	31.955	-1.01703	0.365153	0.455776	-6.61811	RPL17A
0.186604	30.9242	1.00064	0.372151	0.462821	-6.63447	RPL16B
-0.428714	24.8889	-0.99003	0.376743	0.466834	-6.64498	RVB1
-0.292655	25.9253	-0.922824	0.406962	0.502459	-6.70989	FAS2
0.460634	23.3592	0.917833	0.409285	0.503509	-6.71459	RSM23
0.168226	31.275	0.874409	0.429964	0.525416	-6.75479	RPL3
0.161433	31.6379	0.872662	0.430814	0.525416	-6.75638	RPL24B
-0.665804	22.6016	-0.870838	0.431702	0.525416	-6.75804	CBR1
0.332986	23.2045	0.86637	0.433884	0.5262	-6.76209	RPT5
-0.159108	30.4569	-0.824443	0.454798	0.549614	-6.79938	RPL34B
0.177211	29.6952	0.815183	0.459522	0.553368	-6.80744	RPS31
-0.175572	32.2491	-0.808667	0.46287	0.555443	-6.81307	RPS17A
-0.216922	23.5346	-0.767628	0.48439	0.579235	-6.84777	TIF35
0.26016	31.6205	0.744595	0.496796	0.592001	-6.86666	RPL13B
-0.358217	20.2188	-0.732385	0.503468	0.597869	-6.87649	ECM29
0.138616	32.1163	0.717455	0.511717	0.605561	-6.88835	RPL19B
0.217487	23.9851	0.706269	0.517961	0.610837	-6.8971	MRPS9
0.211571	26.7721	0.667447	0.540057	0.631049	-6.92665	FAS1
-0.344323	22.8589	-0.667401	0.540084	0.631049	-6.92669	UTP13
0.369139	23.7444	0.666447	0.540635	0.631049	-6.9274	PAB1
0.138633	31.9032	0.620694	0.567531	0.660189	-6.96044	RPL8B
0.177899	23.5628	0.592046	0.584822	0.677997	-6.98014	HXT2
0.140338	31.5936	0.575476	0.594978	0.687441	-6.99118	RPL2B
0.109751	23.4894	0.557339	0.606224	0.698076	-7.00295	UTP8
-0.200004	31.3852	-0.547279	0.612518	0.702957	-7.00934	RPL1A
0.124217	31.6373	0.53983	0.617205	0.704035	-7.01401	RPL27A
-0.43113	22.1227	-0.539245	0.617575	0.704035	-7.01438	PWP2
0.322204	21.4868	0.533282	0.621344	0.705978	-7.01807	SPF1
-0.320722	22.5095	-0.523327	0.627667	0.710801	-7.02415	UTP21
0.108927	23.9178	0.486224	0.65157	0.735436	-7.04595	UTP15
-0.257688	20.8446	-0.461491	0.66779	0.751264	-7.05968	TYW1
0.127649	23.344	0.439137	0.68264	0.765452	-7.07153	PDR5
0.214321	23.9861	0.429578	0.689044	0.770108	-7.07644	SEC27
0.237357	22.613	0.417961	0.696868	0.774247	-7.08227	SEC26
-0.160159	31.1409	-0.417359	0.697275	0.774247	-7.08257	RPL31A
-0.0745764	30.9128	-0.404323	0.706112	0.780613	-7.08892	RPL33A
-0.13638	24.0357	-0.402174	0.707573	0.780613	-7.08995	ERG11
-0.113822	31.026	-0.391	0.715201	0.786491	-7.09523	RPS9B
0.301011	23.4336	0.350692	0.743039	0.813326	-7.1131	WBP1
0.103802	31.5543	0.348798	0.744359	0.813326	-7.1139	RPL25
-0.183666	22.7527	-0.318516	0.765608	0.833878	-7.12605	RIX7
-0.0618557	31.3929	-0.309153	0.772229	0.83842	-7.1296	RPL14B
0.0816389	23.0122	0.297773	0.780308	0.84451	-7.13378	MAK5
0.104016	30.4583	0.289579	0.786146	0.848144	-7.13669	RPL10
0.0783549	23.2918	0.273109	0.79793	0.853679	-7.14231	RPT2
-0.135406	23.0829	-0.271435	0.799132	0.853679	-7.14286	MRP51
0.0508048	31.0025	0.270232	0.799996	0.853679	-7.14326	RPS26B
-0.223807	25.1299	-0.268472	0.80126	0.853679	-7.14383	COX2
-0.0592623	28.0377	-0.263779	0.804635	0.854612	-7.14535	TIF6
-0.0928719	25.3562	-0.257828	0.808923	0.856506	-7.14724	NSR1
-0.0528571	31.1594	-0.252557	0.812726	0.857878	-7.14887	RPS7A
-0.164944	24.4878	-0.244019	0.818902	0.861737	-7.15146	SEC13
-0.0573061	31.1615	-0.226647	0.831514	0.872325	-7.15644	RPS4A
0.0362809	31.4201	0.192439	0.856524	0.894032	-7.16521	ASC1
0.103115	24.1205	0.191199	0.857435	0.894032	-7.1655	SEC63
0.0399075	21.6008	0.184875	0.862083	0.894629	-7.16696	SEC23
-0.0350278	32.5675	-0.183304	0.863239	0.894629	-7.16731	RPL4A
0.121401	22.7654	0.158149	0.881798	0.911103	-7.17258	KRS1
-0.0452172	30.5295	-0.14849	0.88895	0.915726	-7.1744	RPS15
-0.0328358	22.6174	-0.139647	0.895508	0.919711	-7.17597	SSZ1
0.0768574	22.1015	0.0975243	0.926876	0.949077	-7.18212	THS1
0.0147199	31.2088	0.0792821	0.940515	0.957565	-7.18411	RPS14B
-0.0172965	22.8968	-0.0732856	0.945004	0.957565	-7.18467	RSM24
0.0550734	25.5826	0.0723945	0.945671	0.957565	-7.18475	VMA6
0.0133652	30.2545	0.0681148	0.948876	0.957565	-7.18512	RPS7B
-0.012462	32.0831	-0.0677294	0.949165	0.957565	-7.18516	RPS18A
0.0043851	31.7156	0.0210759	0.984168	0.988409	-7.18772	RPL5
-0.00461253	31.1277	-0.0192773	0.985519	0.988409	-7.18776	RPS24A
0.00402815	23.7032	0.0082582	0.993796	0.993796	-7.18795	PGI1

## Sheet: UPF1-FLAG
logFC	AveExpr	t	P.Value	adj.P.Val	B	Protein
4.69723	30.4681	19.2844	2.02452e-06	0.000240918	5.84483	NAM7
-1.31988	29.3696	-7.50021	0.000364782	0.0217045	0.630444	SSB1
2.53113	26.6337	5.74403	0.00143177	0.0374132	-0.877046	CCT3
-1.23658	31.4097	-5.71298	0.00147091	0.0374132	-0.906931	RPL32
-2.21727	30.6959	-5.63697	0.00157198	0.0374132	-0.980601	RPL22A
-2.33498	30.6201	-5.21501	0.00230173	0.0417072	-1.40353	RPS21B
-1.13957	32.6287	-5.11112	0.00253677	0.0417072	-1.51139	RPL12A
-1.15777	32.9945	-5.00567	0.00280385	0.0417072	-1.62244	RPS27A
1.06689	29.2041	4.78769	0.00346439	0.045807	-1.85706	SAM1
0.816204	33.4288	4.01729	0.00771678	0.0918296	-2.74309	RPS6B
2.10748	26.167	3.60284	0.0123151	0.133227	-3.25703	LEU1
0.845188	32.2219	3.43243	0.0150405	0.145971	-3.4757	RPL18A
0.827574	32.0159	3.31583	0.0172902	0.145971	-3.62767	RPL3
0.88216	33.0597	3.28072	0.0180389	0.145971	-3.67379	RPL11A
-1.7813	28.34	-3.23163	0.0191462	0.145971	-3.73854	APA1
0.800391	31.8414	3.19875	0.0199298	0.145971	-3.78208	RPL10
-1.82543	31.2397	-3.12766	0.0217478	0.145971	-3.8767	RPS28A
-1.74625	28.607	-3.1054	0.0223537	0.145971	-3.90644	SSA2
-0.916564	32.0728	-3.07172	0.0233063	0.145971	-3.95156	RPL23A
0.659007	33.2465	3.00201	0.0254224	0.151264	-4.04537	RPS11B
-0.579067	27.4653	-2.7271	0.036059	0.204334	-4.42005	ATP2
-1.62699	30.552	-2.67869	0.0383889	0.207649	-4.48669	RPS25B
0.495974	33.2807	2.40732	0.0548197	0.275689	-4.86247	RPS8B
-0.724058	32.708	-2.38154	0.0567309	0.275689	-4.89828	RPL35B
-2.04931	25.801	-2.30944	0.0624587	0.275689	-4.99843	GUS1
-0.764014	28.4675	-2.30134	0.0631388	0.275689	-5.00967	NOP1
-1.27006	28.009	-2.29184	0.0639464	0.275689	-5.02285	ENO2
0.495108	33.2665	2.28116	0.064868	0.275689	-5.03769	RPS5
-1.0454	32.5687	-2.23585	0.0689338	0.282866	-5.10056	RPL28
-1.06991	28.4779	-2.20389	0.0719607	0.285444	-5.14486	DED1
-0.85294	30.9791	-2.07097	0.086107	0.326655	-5.32851	RPS23B
-0.396546	32.2248	-2.05625	0.08784	0.326655	-5.34876	RPS22A
-0.621585	31.4	-2.00438	0.0942402	0.328974	-5.41997	RPL34B
0.368156	33.4916	1.94054	0.102773	0.328974	-5.50718	RPS3
0.353125	33.2813	1.93682	0.103293	0.328974	-5.51224	RPL17A
-1.29709	31.7384	-1.92654	0.104747	0.328974	-5.52623	RPL39
-0.818073	31.6335	-1.91133	0.106935	0.328974	-5.5469	RPL30
-0.581708	28.9801	-1.88928	0.110189	0.328974	-5.5768	YHR020W
0.354181	33.2057	1.88862	0.110287	0.328974	-5.57769	RPL7A
-1.51126	27.8461	-1.88667	0.11058	0.328974	-5.58033	GPM1
-0.558962	27.4997	-1.81689	0.121585	0.352892	-5.67438	ATP1
0.394186	33.2635	1.69326	0.143815	0.407476	-5.8386	RPL19B
0.341911	32.5162	1.67176	0.14807	0.409774	-5.86679	RPS4A
-0.387408	30.1288	-1.64957	0.152588	0.412681	-5.89575	PMA1
-0.681314	31.7455	-1.61245	0.160447	0.418345	-5.9439	RPS19A
0.321542	33.0997	1.55736	0.172835	0.418345	-6.0146	RPS1B
-0.888752	32.2901	-1.54168	0.176524	0.418345	-6.03454	RPS14B
-1.31411	26.3863	-1.53946	0.177053	0.418345	-6.03736	NOG1
-0.835089	30.8983	-1.53711	0.177614	0.418345	-6.04034	RPS15
0.29206	33.4232	1.52848	0.179688	0.418345	-6.05127	RPL20B
0.332804	32.9373	1.5282	0.179756	0.418345	-6.05163	RPL2B
-2.33567	32.104	-1.50352	0.185816	0.418345	-6.08273	RPS0A
0.280881	32.3224	1.5015	0.186322	0.418345	-6.08527	RPS9B
-0.759383	32.4641	-1.47931	0.191951	0.423002	-6.11304	RPS12
0.355278	30.555	1.40562	0.211803	0.456313	-6.20389	CDC19
0.303313	31.7246	1.39312	0.215354	0.456313	-6.21909	RPL16A
-0.792545	27.7981	-1.38196	0.21857	0.456313	-6.2326	NOP56
0.252986	32.966	1.36283	0.224186	0.459968	-6.25563	RPL6A
-0.967157	27.9266	-1.29925	0.243806	0.483845	-6.33098	VMA2
-0.70851	27.314	-1.29878	0.243955	0.483845	-6.33153	FAS1
-0.248049	32.0524	-1.24281	0.2625	0.506198	-6.39623	RPL1A
0.438834	31.9383	1.23921	0.263734	0.506198	-6.40033	TEF1
0.470584	29.0704	1.21706	0.271441	0.509351	-6.42545	ADH1
0.242399	32.1261	1.21	0.273937	0.509351	-6.43339	RPL16B
0.708443	33.2841	1.19658	0.278741	0.51031	-6.44843	RPL15A
-0.256156	32.4266	-1.07502	0.325644	0.58266	-6.57983	RPS16B
0.298958	33.0364	1.06918	0.328052	0.58266	-6.58591	RPS20
-1.09686	27.8057	-1.01028	0.353206	0.618111	-6.64602	YHB1
-0.521515	26.934	-0.991288	0.361642	0.623701	-6.6649	YHM2
-0.291414	28.1239	-0.96952	0.371508	0.631564	-6.68623	OLA1
0.235745	33.4478	0.924847	0.392424	0.637153	-6.72892	RPL4A
0.361537	32.6425	0.913844	0.397714	0.637153	-6.73921	RPL5
0.167204	33.3454	0.911189	0.398998	0.637153	-6.74168	RPP0
-0.272882	29.9223	-0.898984	0.404944	0.637153	-6.75296	TDH3
0.262327	32.9445	0.897898	0.405477	0.637153	-6.75396	RPL8B
-0.277983	33.5071	-0.894957	0.406921	0.637153	-6.75666	RPS17A
-0.750529	27.876	-0.863069	0.422834	0.653471	-6.78548	EFT1
-0.437252	27.7027	-0.81314	0.448678	0.667793	-6.829	PET9
-0.383912	27.3769	-0.812324	0.44911	0.667793	-6.82969	LAT1
0.274788	31.2826	0.80512	0.452935	0.667793	-6.83579	RPS31
0.258777	32.5072	0.802094	0.454548	0.667793	-6.83835	RPL21A
-0.175536	29.658	-0.76295	0.475794	0.683796	-6.87065	PDC1
-0.654535	31.8128	-0.760887	0.476933	0.683796	-6.87232	RPL24A
1.08436	27.4347	0.712448	0.50422	0.714311	-6.91038	ACT1
-0.464986	26.6674	-0.658608	0.535762	0.736953	-6.9502	GFA1
-0.241959	28.1259	-0.652489	0.539426	0.736953	-6.95456	TEF4
-0.13662	32.7204	-0.651303	0.540138	0.736953	-6.9554	ASC1
0.111509	30.342	0.643275	0.544974	0.736953	-6.96106	LEU2
0.123122	33.1718	0.626417	0.555218	0.738471	-6.97273	RPL25
-0.180597	32.1568	-0.602877	0.569722	0.738471	-6.98859	RPS7A
-0.112408	32.6083	-0.597242	0.573229	0.738471	-6.9923	RPS24A
-0.519033	26.1803	-0.596048	0.573973	0.738471	-6.99309	NOG2
-0.601802	26.8902	-0.591006	0.577124	0.738471	-6.99638	TUB2
0.177953	32.55	0.560908	0.596148	0.754697	-7.01552	RPL13B
-0.126828	28.9184	-0.528402	0.617098	0.764956	-7.03518	MIR1
-0.111698	32.0809	-0.528388	0.617108	0.764956	-7.03518	RPL14B
-0.118908	32.3697	-0.480407	0.648772	0.786248	-7.06225	RPL26B
-0.872794	25.5188	-0.473093	0.653673	0.786248	-7.06617	URA7
-0.393054	27.3158	-0.472448	0.654106	0.786248	-7.06651	SAH1
0.313469	27.0288	0.452628	0.667489	0.794312	-7.07683	ILV2
-0.341035	32.3627	-0.421446	0.688819	0.809885	-7.09224	RPL9A
0.208865	26.749	0.409213	0.697275	0.809885	-7.098	PSA1
0.536108	30.5424	0.382494	0.715913	0.809885	-7.11003	HHF1
0.392922	26.56	0.369803	0.724844	0.809885	-7.11547	ARO1
0.402	26.4317	0.369775	0.724864	0.809885	-7.11548	URA2
0.0880875	32.8012	0.369364	0.725153	0.809885	-7.11565	RPL6B
0.0926372	33.3057	0.365028	0.728216	0.809885	-7.11747	RPS13
-0.29946	26.2629	-0.284296	0.786202	0.863859	-7.14753	MAE1
0.216786	26.8389	0.277354	0.791266	0.863859	-7.14978	MES1
-0.0485489	32.1532	-0.239449	0.819113	0.886131	-7.16109	RPL33A
0.059859	32.147	0.20803	0.84242	0.894902	-7.16923	RPS2
0.226772	26.3907	0.198672	0.849398	0.894902	-7.17144	VMA1
-0.10644	27.637	-0.198159	0.849781	0.894902	-7.17156	KAP123
-0.0420476	33.2609	-0.155689	0.881631	0.920299	-7.18029	RPL27A
-0.0176767	33.3003	-0.0821983	0.937292	0.960725	-7.19048	RPS18A
0.0213509	27.8515	0.0762515	0.941818	0.960725	-7.19103	YEF3
-0.125335	25.1617	-0.0724198	0.944735	0.960725	-7.19136	SXM1
0.0623758	26.4452	0.0620293	0.952652	0.960725	-7.19217	RNA1
0.000395238	27.2876	0.000378028	0.999711	0.999711	-7.19442	FAS2

## Sheet: UPF1-FLAG_upf2del
logFC	AveExpr	t	P.Value	adj.P.Val	B	Protein
4.74501	30.3216	24.2636	6.27896e-07	9.16728e-05	6.70858	NAM7
5.39496	22.9237	11.1182	4.7271e-05	0.00256275	2.8427	FET4
-1.93258	26.0743	-10.8994	5.26593e-05	0.00256275	2.73149	MAE1
-2.54002	31.8201	-9.59761	0.000104595	0.0037698	2.01416	RPS12
-2.79443	28.2709	-9.22749	0.000129103	0.0037698	1.7909	APA1
-1.56973	32.4428	-6.92906	0.000579926	0.0126292	0.165296	RPL28
-1.89199	26.4931	-6.86322	0.000609006	0.0126292	0.111623	OAC1
1.18219	32.9654	6.69369	0.000692011	0.0126292	-0.0286992	RPL11A
-2.11659	27.4715	-5.75074	0.00148206	0.0227204	-0.868806	EFT1
-2.18915	25.3663	-5.694	0.00155619	0.0227204	-0.922806	PAB1
-2.09933	27.5044	-5.58346	0.00171323	0.0227392	-1.02921	TY1B-LR2
-1.34662	28.5032	-5.45908	0.00191218	0.0229491	-1.15086	MIR1
-3.11259	25.2877	-5.38492	0.00204342	0.0229491	-1.22438	ERB1
-1.36508	28.8781	-5.24155	0.00232759	0.0242734	-1.36864	HHF1
1.0218	33.4015	5.02293	0.00285281	0.0277673	-1.59411	RPS6B
-2.17732	28.707	-4.93685	0.00309596	0.0278428	-1.68475	SSA2
-1.74024	31.3032	-4.83204	0.00342469	0.0278428	-1.79657	RPL32
-1.61593	26.2347	-4.82963	0.00343268	0.0278428	-1.79916	GUS1
-2.88439	27.3209	-4.61676	0.00423304	0.0325276	-2.03131	GPM1
-1.33102	25.9552	-4.3527	0.00553821	0.0399054	-2.32873	RNA1
-1.62589	27.5466	-4.31829	0.00573982	0.0399054	-2.36827	PET9
-2.91723	24.6203	-4.20525	0.00646312	0.0428916	-2.49943	CRM1
-1.11202	29.6956	-3.99583	0.00809312	0.0513737	-2.74762	SSB1
-1.63	28.2843	-3.84761	0.00952767	0.05796	-2.92734	NOP1
0.801016	32.2651	3.68989	0.0113767	0.0624976	-3.12226	RPL3
-2.11188	25.2421	-3.66465	0.0117084	0.0624976	-3.1538	SRP68
-1.69405	31.3362	-3.66239	0.0117386	0.0624976	-3.15663	RPS28A
1.22846	26.9169	3.64414	0.0119859	0.0624976	-3.17949	LEU1
-2.12486	27.1666	-3.52462	0.0137571	0.0692599	-3.33049	MRT4
-1.94103	25.1446	-3.46012	0.0148331	0.0721303	-3.41284	GRS1
0.740953	32.3574	3.43288	0.0153153	0.0721303	-3.44779	RPL18A
0.70231	32.1223	3.29205	0.018104	0.0825994	-3.63017	RPL16B
-1.19848	26.5025	-3.20963	0.0199943	0.0884595	-3.73813	FAA4
0.659261	33.7866	3.16692	0.0210588	0.0904291	-3.79443	RPS3
0.758397	31.6928	3.11755	0.022368	0.0933065	-3.85978	RPL16A
-2.33675	27.0544	-3.05141	0.0242643	0.0959683	-3.94781	NOP56
-2.01128	25.6752	-3.04953	0.0243207	0.0959683	-3.95032	IDH2
-2.2762	26.0971	-3.00843	0.0255907	0.0983223	-4.00527	NOP7
-2.44683	27.4453	-2.94631	0.0276506	0.101275	-4.0887	ENO2
-3.45039	30.0698	-2.94354	0.0277466	0.101275	-4.09243	RPL22A
-1.39524	28.5916	-2.88808	0.029747	0.103643	-4.16728	DED1
-0.950078	31.4973	-2.88626	0.029815	0.103643	-4.16973	RPL23A
1.70781	24.3676	2.8645	0.0306446	0.104049	-4.19919	MYO2
-0.923716	32.7557	-2.81102	0.0327916	0.106738	-4.27176	RPS27A
0.701504	31.9636	2.80845	0.0328987	0.106738	-4.27525	RPL10
0.991712	33.4601	2.70338	0.037625	0.119418	-4.41858	RPL4A
0.587967	29.5	2.66914	0.0393197	0.122142	-4.46546	SAM1
0.509012	33.2679	2.62028	0.0418825	0.127393	-4.53251	RPL7A
-0.707522	27.3825	-2.57102	0.0446484	0.133034	-4.60024	TUB2
-2.31531	26.0496	-2.49131	0.049547	0.144677	-4.71008	MES1
-1.75084	27.1305	-2.40357	0.0556092	0.152013	-4.83124	ATP2
-0.739098	28.9917	-2.39793	0.0560245	0.152013	-4.83902	PDC1
-0.956746	27.8688	-2.3901	0.0566069	0.152013	-4.84984	TEF4
-0.4291	32.1319	-2.37632	0.0576479	0.152013	-4.86889	RPS7A
0.66446	33.5772	2.36319	0.0586585	0.152013	-4.88703	RPS5
-0.845573	30.224	-2.3562	0.0592045	0.152013	-4.8967	PMA1
0.623068	32.6248	2.35438	0.0593476	0.152013	-4.89922	RPS4A
-0.570524	31.9159	-2.3112	0.0628474	0.158202	-4.95888	RPL30
-0.855839	31.5325	-2.26606	0.0667404	0.16432	-5.02125	RPL38
-0.988825	25.3238	-2.24865	0.068308	0.16432	-5.04529	ERG13
-0.630128	32.0159	-2.24486	0.0686543	0.16432	-5.05052	RPL21A
-2.35284	28.437	-2.21741	0.0712194	0.16771	-5.08841	RPP2B
0.580878	33.1569	2.17384	0.0754977	0.173291	-5.14849	RPL15A
-1.49877	28.055	-2.16925	0.075963	0.173291	-5.1548	YHB1
0.878325	32.8013	2.15482	0.0774482	0.173961	-5.17469	RPL5
-2.42397	30.5943	-2.14123	0.078873	0.174477	-5.19338	RPL34B
0.637379	32.8879	2.11843	0.0813261	0.177218	-5.22474	RPS14B
-1.3678	26.7995	-2.05615	0.0884375	0.189881	-5.31021	NOG1
-0.644308	26.8989	-2.03904	0.0905004	0.191494	-5.33363	TUB1
-2.13788	25.4348	-2.02305	0.0924731	0.192873	-5.35549	SUP45
1.30221	32.045	2.00352	0.0949427	0.195234	-5.38216	RPL24A
-1.73588	27.4684	-1.97357	0.0988606	0.200467	-5.42296	OLA1
-2.3553	30.2237	-1.95202	0.101783	0.203565	-5.45228	RPS15
-2.51839	29.9339	-1.91269	0.107341	0.208324	-5.50559	RPS21B
0.367058	33.1378	1.90397	0.108614	0.208324	-5.51738	RPL6A
-0.625468	33.4117	-1.9009	0.109066	0.208324	-5.52152	RPS17A
-0.471997	32.1394	-1.89548	0.109869	0.208324	-5.52885	RPL33A
-0.638609	27.0735	-1.87709	0.112637	0.210834	-5.55366	YHM2
-0.412627	33.0577	-1.85407	0.116199	0.214748	-5.58462	RPS13
-1.78539	26.3785	-1.84133	0.11822	0.215752	-5.60173	GFA1
-2.08719	24.7298	-1.77296	0.129678	0.23374	-5.69299	GCN1
-0.56132	33.0865	-1.76225	0.13157	0.234259	-5.70721	RPS18A
-2.04989	25.9233	-1.73116	0.13722	0.240931	-5.74833	PFK1
-0.908015	27.4714	-1.72366	0.138618	0.240931	-5.75822	FAS1
-2.13617	24.5253	-1.71449	0.140346	0.241065	-5.77029	ACC1
-2.1797	25.5578	-1.69458	0.144173	0.244759	-5.79643	VMA1
-1.20751	26.1221	-1.67206	0.148623	0.248888	-5.82587	PSA1
0.307056	33.1825	1.66165	0.150726	0.248888	-5.83944	RPL17A
-1.87565	29.0093	-1.65609	0.151861	0.248888	-5.84668	RPS25B
0.48906	32.8993	1.6446	0.154232	0.248888	-5.8616	RPL9A
-1.60565	25.8468	-1.6403	0.155129	0.248888	-5.86717	ARO1
-1.44123	26.8168	-1.63093	0.157101	0.249313	-5.87931	ATP1
-0.323176	32.0706	-1.61289	0.160964	0.252697	-5.9026	RPS2
-1.63373	26.2357	-1.59088	0.165803	0.257523	-5.93088	SAH1
-1.48187	27.0235	-1.58284	0.167606	0.257584	-5.94118	HSC82
0.312491	33.0597	1.57094	0.170309	0.259012	-5.95639	RPL6B
-1.02429	27.5827	-1.54654	0.17598	0.264877	-5.98742	YEF3
0.289041	33.3451	1.53376	0.179023	0.266707	-6.0036	RPL19B
-0.347301	31.355	-1.49279	0.189113	0.278894	-6.05508	RPS23B
0.456618	32.4652	1.47402	0.193913	0.283113	-6.07846	RPL26B
-0.26818	31.9494	-1.41336	0.21022	0.303882	-6.15313	RPS22A
0.626532	32.938	1.39113	0.216508	0.30714	-6.18013	RPS11B
-1.89459	24.5834	-1.38823	0.217341	0.30714	-6.18363	HMG1
-1.04015	25.607	-1.37985	0.219765	0.30714	-6.19375	URA7
-0.722842	26.2188	-1.376	0.220889	0.30714	-6.19839	NOG2
0.311397	33.1268	1.3089	0.241298	0.332353	-6.27813	RPL2B
-0.946996	26.8254	-1.27801	0.251254	0.342833	-6.31413	LAT1
0.287574	32.8636	1.20853	0.274995	0.371753	-6.39333	RPL13B
-0.626196	29.5754	-1.17863	0.285806	0.382822	-6.42663	RPL43B
-0.24963	32.2642	-1.16895	0.289381	0.384087	-6.43729	RPS16B
-0.485198	29.0221	-1.15988	0.29277	0.385085	-6.44725	YHR020W
-0.864958	26.402	-1.15187	0.295788	0.385581	-6.45599	URA2
-0.664301	27.2577	-1.0987	0.316514	0.408947	-6.5131	ILV2
-0.182333	32.4202	-1.03685	0.342145	0.438186	-6.57731	RPS9B
-0.252023	32.292	-1.02329	0.347987	0.441792	-6.59105	RPL1A
-1.31617	24.3292	-0.909695	0.400138	0.503622	-6.70111	RPN1
-0.485665	32.3513	-0.850354	0.429696	0.529206	-6.75479	RPL12A
-0.369234	27.8274	-0.849858	0.42995	0.529206	-6.75523	KAP123
-0.552172	28.286	-0.847147	0.431339	0.529206	-6.75761	VMA2
-0.165425	33.4768	-0.791797	0.460429	0.560189	-6.805	RPL20B
-0.164268	33.4243	-0.778729	0.467499	0.56409	-6.81582	RPL27A
-0.135898	32.1503	-0.722163	0.498988	0.593682	-6.86095	RPL14B
0.128165	32.7912	0.716784	0.502056	0.593682	-6.8651	RPS20
-0.293037	29.7436	-0.712998	0.504223	0.593682	-6.868	LEU2
0.792403	25.3697	0.686159	0.519769	0.60709	-6.8882	HXT3
-0.219173	28.698	-0.629998	0.55331	0.639543	-6.92834	ADH1
0.120797	33.2156	0.625074	0.556315	0.639543	-6.93172	RPS1B
0.137873	33.5474	0.614306	0.562921	0.642082	-6.93903	RPS8B
-0.271219	31.3999	-0.587567	0.579536	0.653195	-6.95669	RPS19A
-0.210196	27.0287	-0.584259	0.581612	0.653195	-6.95883	ACT1
1.11697	30.519	0.567599	0.592134	0.659935	-6.96943	RPL39
0.101252	32.6804	0.539853	0.609904	0.674591	-6.98647	RPS24A
0.125664	33.2244	0.51582	0.625539	0.686682	-7.00061	RPS0A
-0.400692	25.8503	-0.504868	0.632737	0.6894	-7.00686	CCT4
-0.154054	30.3903	-0.469007	0.656618	0.710121	-7.02646	TDH3
-0.0935349	31.7992	-0.419838	0.690103	0.740846	-7.05115	TEF1
-0.0863715	33.4169	-0.406482	0.699339	0.745281	-7.05742	RPP0
-0.0828075	32.6056	-0.396142	0.70653	0.747488	-7.06214	RPL8B
-0.591551	27.1818	-0.388005	0.712212	0.748079	-7.06577	FAS2
-0.193002	31.8421	-0.378907	0.718589	0.749386	-7.06975	RPL35B
0.136371	30.7623	0.288246	0.783442	0.811224	-7.10443	RPS31
0.0744705	32.9593	0.231467	0.825108	0.848351	-7.12149	ASC1
0.0394097	33.3111	0.212247	0.839365	0.855292	-7.12643	RPL25
-0.07578	32.0723	-0.206589	0.843576	0.855292	-7.12781	RPL36B
-0.0764558	25.9098	-0.124519	0.905217	0.91146	-7.14362	ENP1
0.0328136	30.5669	0.0997305	0.924003	0.924003	-7.14687	CDC19

## Sheet: DE572AA-FLAG
logFC	AveExpr	t	P.Value	adj.P.Val	B	Protein
5.36722	29.1478	21.8584	3.88838e-07	4.54941e-05	6.90756	NAM7
-2.02095	30.8768	-7.86221	0.000183455	0.0107321	1.39359	RPL32
-3.1175	30.6538	-6.15232	0.000726346	0.0283275	-0.061488	RPS28A
-2.22241	26.5421	-5.81231	0.000988776	0.0289217	-0.391848	TUB2
-2.58425	26.6234	-4.65822	0.00313047	0.0640972	-1.63279	NOP56
-1.39815	28.0713	-4.61299	0.00328704	0.0640972	-1.68543	NOP1
-1.12471	28.5036	-4.2429	0.00495515	0.0674841	-2.128	DED1
-2.08905	27.2604	-4.17836	0.00533385	0.0674841	-2.20735	ENO2
-1.13225	31.6639	-4.08992	0.00590621	0.0674841	-2.31711	RPL23A
-1.52054	28.6638	-4.07932	0.00597932	0.0674841	-2.33036	APA1
-2.69891	26.8344	-3.9857	0.00667021	0.0674841	-2.44802	OLA1
2.37109	28.0783	3.9543	0.00692145	0.0674841	-2.48778	LEU1
1.21661	29.64	3.59262	0.0107123	0.0964105	-2.95642	SAM1
-1.03294	27.7632	-3.43017	0.0131191	0.104804	-3.17302	PET9
-2.28209	27.1653	-3.41123	0.0134364	0.104804	-3.19851	EFT1
0.790594	33.6409	3.35834	0.0143674	0.105062	-3.26993	RPS3
-0.93896	26.6333	-2.88346	0.0267021	0.183773	-3.92588	NOG1
-1.23112	29.5986	-2.76411	0.0313537	0.200545	-4.09411	SSB1
-1.50117	25.5962	-2.73607	0.0325672	0.200545	-4.13376	CCT8
-1.22856	26.6018	-2.64031	0.0371034	0.217055	-4.26953	GUS1
-0.947973	31.7519	-2.41633	0.0505255	0.273086	-4.5882	RPS22A
0.653908	33.4348	2.38461	0.0528032	0.273086	-4.63335	RPS6B
0.620363	33.0751	2.35023	0.0553931	0.273086	-4.68226	RPL15A
0.660095	33.5654	2.33677	0.056443	0.273086	-4.70141	RPL20B
0.726714	32.5594	2.31294	0.0583518	0.273086	-4.73528	RPS4A
-2.93277	32.0967	-2.22002	0.0664565	0.290369	-4.86714	RPS27A
-1.18134	32.0767	-2.21413	0.0670082	0.290369	-4.87548	RPL12A
-1.28181	28.4215	-2.0821	0.0806706	0.334844	-5.06172	TIF6
0.833782	31.9966	2.06192	0.0829955	0.334844	-5.09003	RPL3
0.497055	33.6142	1.91561	0.101995	0.38537	-5.29361	RPL4A
-3.26821	25.2428	-1.88477	0.106524	0.38537	-5.33608	ARO1
-1.29067	31.746	-1.82421	0.116002	0.38537	-5.41892	RPL39
-2.59602	31.4048	-1.82334	0.116144	0.38537	-5.42011	RPS12
0.508169	33.2435	1.81605	0.117341	0.38537	-5.43003	RPL6A
0.505924	33.3079	1.74829	0.129059	0.38537	-5.52163	RPS1B
0.424396	33.455	1.74658	0.129369	0.38537	-5.52393	RPL19B
-1.4403	26.3359	-1.70164	0.137779	0.38537	-5.58401	GFA1
0.502086	33.1164	1.70037	0.138024	0.38537	-5.5857	RPL6B
-0.838682	32.8561	-1.69456	0.139152	0.38537	-5.59343	RPL28
-0.817152	32.1537	-1.68316	0.141389	0.38537	-5.60857	RPL21A
-0.959993	30.6981	-1.68148	0.141721	0.38537	-5.61079	RPS23B
-1.29273	28.0972	-1.6671	0.144599	0.38537	-5.62982	YHB1
-1.03225	26.5422	-1.64664	0.14879	0.38537	-5.65678	MES1
-0.451669	31.6731	-1.64032	0.150108	0.38537	-5.66508	RPL30
0.549834	32.99	1.63489	0.151249	0.38537	-5.6722	RPS14B
-0.530553	33.5689	-1.62579	0.15318	0.38537	-5.68413	RPS17A
0.428448	33.3319	1.61821	0.154807	0.38537	-5.69403	RPL7A
0.415488	33.2179	1.59712	0.159418	0.388582	-5.7215	RPS11B
0.636132	32.6335	1.56939	0.16568	0.395603	-5.75739	RPL9A
-0.699235	26.2712	-1.54841	0.170569	0.399132	-5.78435	TUB1
-0.395198	31.9454	-1.52032	0.177329	0.40534	-5.82022	RPL1A
-0.419491	32.0892	-1.49429	0.183817	0.40534	-5.85319	RPL33A
-0.634548	29.805	-1.48683	0.185715	0.40534	-5.86259	TDH3
0.509879	33.3716	1.48151	0.18708	0.40534	-5.86927	RPS5
0.550269	31.9805	1.45945	0.19284	0.410223	-5.89688	RPL10
0.42035	33.177	1.44029	0.197977	0.413631	-5.92071	RPS8B
-0.891658	27.3106	-1.37491	0.216453	0.444298	-6.00079	MRT4
0.376592	33.0928	1.3264	0.231153	0.466292	-6.05893	RPL11A
0.656575	30.7903	1.23214	0.262264	0.519307	-6.16849	CDC19
-0.919449	27.2893	-1.22061	0.266311	0.519307	-6.18157	OAC1
-2.03995	25.8392	-1.19969	0.273788	0.524513	-6.20509	URA2
-1.61022	26.9735	-1.18827	0.277947	0.524513	-6.21783	FAS2
-0.613864	32.9441	-1.17259	0.283741	0.526947	-6.23519	RPS18A
-0.901673	31.6393	-1.15403	0.290735	0.530497	-6.25556	RPL36B
-1.24345	25.905	-1.12378	0.302443	0.530497	-6.28829	VMA1
0.662591	32.2571	1.1146	0.306072	0.530497	-6.29811	RPL18A
0.459141	28.0356	1.10821	0.308619	0.530497	-6.30491	LAT1
-0.532492	28.1635	-1.10036	0.311775	0.530497	-6.31324	TEF4
-0.303665	32.0109	-1.09768	0.312857	0.530497	-6.31607	RPS7A
-0.262684	32.5001	-1.05871	0.328957	0.549828	-6.35673	RPS16B
-0.348409	31.2353	-1.01219	0.349046	0.575188	-6.40391	RPL34B
0.314351	32.1499	0.988814	0.359507	0.584198	-6.42705	RPL16B
0.280431	33.1718	0.964257	0.370759	0.586351	-6.45093	RPL25
-0.742731	29.0379	-0.964051	0.370854	0.586351	-6.45113	MIR1
-0.28962	25.85	-0.891535	0.405682	0.632863	-6.51902	ENP1
0.270803	32.9111	0.85851	0.422335	0.647341	-6.54858	RPL2B
-1.12356	26.3457	-0.851319	0.426028	0.647341	-6.5549	MAE1
-0.557311	29.8989	-0.815976	0.444517	0.666776	-6.58535	HHF1
-0.423806	27.1998	-0.779453	0.46422	0.687516	-6.61571	YHM2
-0.405138	25.9998	-0.721334	0.496812	0.726588	-6.66166	CCT4
0.207021	32.6453	0.686856	0.516856	0.744784	-6.6875	RPL26B
-0.712212	27.746	-0.676549	0.522949	0.744784	-6.69501	FAS1
-0.326253	26.7878	-0.667475	0.528351	0.744784	-6.70155	PSA1
-0.737949	27.7798	-0.637841	0.546241	0.760836	-6.72235	YEF3
-0.664554	27.2407	-0.597895	0.570943	0.782925	-6.74907	HSC82
-0.246141	28.0497	-0.581203	0.581461	0.782925	-6.75978	ATP1
-0.325515	32.4583	-0.576109	0.584693	0.782925	-6.763	RPL35B
0.205939	33.3042	0.569556	0.588867	0.782925	-6.7671	RPL17A
-0.163893	33.3691	-0.553922	0.598893	0.787309	-6.7767	RPL27A
0.162426	32.5681	0.52963	0.614663	0.787543	-6.79115	RPS24A
0.144715	31.9018	0.517003	0.62295	0.787543	-6.79842	TEF1
0.171716	31.715	0.511602	0.626513	0.787543	-6.80149	RPL16A
-0.269871	31.9767	-0.505249	0.630719	0.787543	-6.80505	RPL24A
0.147592	32.5752	0.494357	0.637963	0.787543	-6.81107	RPL13B
0.252468	28.9594	0.492118	0.639458	0.787543	-6.81229	ADH1
-0.171389	30.4748	-0.460865	0.660511	0.804998	-6.8288	PMA1
-0.216968	33.1708	-0.434498	0.67854	0.818446	-6.84195	RPS13
-0.186624	28.512	-0.335996	0.747877	0.891815	-6.88454	VMA2
0.091257	32.863	0.316585	0.761876	0.891815	-6.89169	RPS20
-0.131646	29.2208	-0.316088	0.762235	0.891815	-6.89187	YHR020W
0.180712	28.1222	0.291311	0.780249	0.897304	-6.9004	ILV2
-0.240777	31.4012	-0.288551	0.782265	0.897304	-6.9013	RPS19A
0.206857	27.1797	0.242407	0.816231	0.927174	-6.91523	ACT1
-0.249256	30.5673	-0.215923	0.835929	0.94042	-6.92215	RPS25B
0.190875	28.2879	0.20066	0.847341	0.94418	-6.92578	LEU2
0.0813542	31.0518	0.183103	0.860518	0.949817	-6.92963	RPS31
-0.0575459	32.6629	-0.164255	0.874719	0.956468	-6.93337	RPL8B
-0.0659981	31.8491	-0.130264	0.900453	0.964185	-6.9391	RPS2
0.0370671	32.3716	0.124036	0.905184	0.964185	-6.94001	RPS9B
0.0691818	31.2328	0.113808	0.912961	0.964185	-6.94141	RPS15
-0.0474617	27.7511	-0.0988123	0.924383	0.964185	-6.94324	KAP123
-0.0346241	29.858	-0.0951844	0.92715	0.964185	-6.94364	PDC1
0.0232884	31.9673	0.0898474	0.931221	0.964185	-6.94421	RPL14B
-0.0246945	33.2939	-0.0672816	0.94846	0.97342	-6.94624	RPP0
0.00972712	28.3784	0.0222028	0.982979	0.998863	-6.94856	ATP2
-0.00110247	32.5612	-0.00258148	0.998021	0.998863	-6.94884	RPL5
0.000463854	32.6652	0.00148343	0.998863	0.998863	-6.94884	ASC1
