# Supplementary material
Source: HighWire-hosted journal article supplement (doi:10.1101/rna.079416.122)
Supplement: Supplemental_Table_S5.xlsx [file Supplemental_Table_S5.xlsx]

## Sheet: Sheet1
Name	Genotype
HFY114	MAT a ade2-1 his3-11,15 leu2-3,112 trp1-1 ura3-1 can1-100 UPF1 NMD2 UPF3
HFY871	MAT a ade2-1 his3-11,15 leu2-3,112 trp1-1 ura3-1 can1-100 upf1::HIS3 NMD2 UPF3
HFY467	MAT a ade2-1, his3-11,15, leu2-3,112, trp1-1, ura3-1, can1-100, nmd2::HIS3, upf1::URA3
