# Supplementary material
Source: HighWire-hosted journal article supplement (doi:10.1101/rna.079416.122)
Supplement: Supplemental_Table_S8.xlsx [file Supplemental_Table_S8.xlsx]

## Sheet: Sheet1
						Quantitative Value (Normalized iBAQ)	Quantitative Value (Normalized iBAQ)	Quantitative Value (Normalized iBAQ)	Quantitative Value (Normalized iBAQ)	Quantitative Value (Normalized iBAQ)	Quantitative Value (Normalized iBAQ)	Quantitative Value (Normalized iBAQ)	Quantitative Value (Normalized iBAQ)	Protein Identification Probability	Protein Identification Probability	Protein Identification Probability	Protein Identification Probability	Protein Identification Probability	Protein Identification Probability	Protein Identification Probability	Protein Identification Probability	Total Spectrum Count	Total Spectrum Count	Total Spectrum Count	Total Spectrum Count	Total Spectrum Count	Total Spectrum Count	Total Spectrum Count	Total Spectrum Count
Identified Proteins (1183)	Accession Number	Alternate ID	Molecular Weight	Protein Grouping Ambiguity	Taxonomy	93I_4816+_FLAG-Upf1	94I_4816-_FLAG-Upf1	95I_4819+_FLAG-Upf1	96I_4819-_FLAG-Upf1	102P_4816+_FLAG-Upf1	103P_4816-_FLAG-Upf1	104P_4819+_FLAG-Upf1	105P_4819-_FLAG-Upf1	93I_4816+_FLAG-Upf1	94I_4816-_FLAG-Upf1	95I_4819+_FLAG-Upf1	96I_4819-_FLAG-Upf1	102P_4816+_FLAG-Upf1	103P_4816-_FLAG-Upf1	104P_4819+_FLAG-Upf1	105P_4819-_FLAG-Upf1	93I_4816+_FLAG-Upf1	94I_4816-_FLAG-Upf1	95I_4819+_FLAG-Upf1	96I_4819-_FLAG-Upf1	102P_4816+_FLAG-Upf1	103P_4816-_FLAG-Upf1	104P_4819+_FLAG-Upf1	105P_4819-_FLAG-Upf1
ATP-dependent helicase NAM7 OS=Saccharomyces cerevisiae (strain ATCC 204508 / S288c) OX=559292 GN=NAM7 PE=1 SV=1	P30771	NAM7	109 kDa		unknown	468650000	402300000	539170000	417570000	2577200000	2948500000	3399200000	4005400000	1	1	1	1	1	1	1	1	99	100	99	87	90	95	90	69
Cluster of 40S ribosomal protein S1-B OS=Saccharomyces cerevisiae (strain ATCC 204508 / S288c) OX=559292 GN=RPS1B PE=1 SV=3 (P23248)	P23248 [2]	RPS1B	29 kDa	TRUE	unknown	2406700000	2267900000	2059700000	2146300000	2904900000	3227100000	2556800000	2661500000	1	1	1	1	1	1	1	1	101	119	105	98	43	47	44	37
Guanine nucleotide-binding protein subunit beta-like protein OS=Saccharomyces cerevisiae (strain ATCC 204508 / S288c) OX=559292 GN=ASC1 PE=1 SV=4	P38011	ASC1	35 kDa		unknown	1825100000	1855600000	2000000000	1601000000	3261700000	3724200000	3508300000	2704100000	1	1	1	1	1	1	1	1	99	115	108	97	36	33	32	26
Cluster of 60S ribosomal protein L4-A OS=Saccharomyces cerevisiae (strain ATCC 204508 / S288c) OX=559292 GN=RPL4A PE=1 SV=4 (P10664)	P10664 [2]	RPL4A	39 kDa	TRUE	unknown	3644200000	3041400000	3711100000	3588400000	6001200000	5814400000	3985500000	4425600000	1	1	1	1	1	1	1	1	104	108	95	95	36	38	32	20
Cluster of Plasma membrane ATPase 1 OS=Saccharomyces cerevisiae (strain ATCC 204508 / S288c) OX=559292 GN=PMA1 PE=1 SV=2 (P05030)	P05030 [2]	PMA1	100 kDa	TRUE	unknown	570490000	501950000	748050000	805820000	247690000	617090000	468100000	571520000	1	1	1	1	1	1	1	1	85	84	100	106	23	40	30	24
60S ribosomal protein L3 OS=Saccharomyces cerevisiae (strain ATCC 204508 / S288c) OX=559292 GN=RPL3 PE=1 SV=4	P14126	RPL3	44 kDa		unknown	1337700000	1220800000	1263700000	1227000000	395890000	573380000	235950000	237180000	1	1	1	1	1	1	1	1	89	105	110	105	19	19	16	13
60S ribosomal protein L23-A OS=Saccharomyces cerevisiae (strain ATCC 204508 / S288c) OX=559292 GN=RPL23A PE=1 SV=1	P0CX41	RPL23A	14 kDa		unknown	1955500000	1869300000	2079800000	2078200000	1113200000	1420300000	1116300000	1188400000	1	1	1	1	1	1	1	1	90	94	88	91	17	18	15	10
Fatty acid synthase subunit alpha OS=Saccharomyces cerevisiae (strain ATCC 204508 / S288c) OX=559292 GN=FAS2 PE=1 SV=2	P19097	FAS2	207 kDa		unknown	30350000	19615000	27930000	30120000	32045000	50679000	35503000	48055000	1	1	1	1	1	1	1	1	60	59	64	68	36	47	33	26
Fatty acid synthase subunit beta OS=Saccharomyces cerevisiae (strain ATCC 204508 / S288c) OX=559292 GN=FAS1 PE=1 SV=2	P07149	FAS1	229 kDa		unknown	48307000	35698000	41815000	44516000	26352000	41363000	26748000	11351000	1	1	1	1	1	1	1	1	76	73	70	69	26	38	25	13
Protein URA2 OS=Saccharomyces cerevisiae (strain ATCC 204508 / S288c) OX=559292 GN=URA2 PE=1 SV=5	P07259	URA2	245 kDa	TRUE	unknown	17171000	17500000	21427000	16181000	12517000	41160000	32652000	34090000	1	1	1	1	1	1	1	1	56	57	60	55	29	48	38	32
Cluster of 60S ribosomal protein L8-B OS=Saccharomyces cerevisiae (strain ATCC 204508 / S288c) OX=559292 GN=RPL8B PE=1 SV=3 (P29453)	P29453 [2]	RPL8B	28 kDa	TRUE	unknown	2594800000	2341500000	2405800000	2133600000	2554200000	3374600000	2468300000	4492300000	1	1	1	1	1	1	1	1	62	61	60	65	35	33	29	24
Cluster of Heat shock protein SSA2 OS=Saccharomyces cerevisiae (strain ATCC 204508 / S288c) OX=559292 GN=SSA2 PE=1 SV=3 (P10592)	P10592 [3]	SSA2	69 kDa	TRUE	unknown	254300000	204010000	190330000	264780000	61213000	119100000	84322000	168320000	1	1	1	1	1	1	1	1	65	67	69	71	20	22	13	16
Putative proline--tRNA ligase YHR020W OS=Saccharomyces cerevisiae (strain ATCC 204508 / S288c) OX=559292 GN=YHR020W PE=1 SV=1	P38708	YHR020W	77 kDa		unknown	141790000	136830000	151520000	120010000	104150000	259120000	225770000	275140000	1	1	1	1	1	1	1	1	60	60	54	55	20	38	30	24
60S ribosomal protein L1-A OS=Saccharomyces cerevisiae (strain ATCC 204508 / S288c) OX=559292 GN=RPL1A PE=1 SV=1	P0CX43	RPL1A	24 kDa		unknown	1598800000	1702400000	1502600000	1779700000	2556200000	3094700000	1935400000	2352400000	1	1	1	1	1	1	1	1	66	76	62	59	21	22	14	13
Cluster of Transposon Ty1-JR1 Gag-Pol polyprotein OS=Saccharomyces cerevisiae (strain ATCC 204508 / S288c) OX=559292 GN=TY1B-JR1 PE=3 SV=3 (P47098)	P47098 [13]	TY1B-JR1	199 kDa	TRUE	unknown	43848000	27956000	36523000	25308000	37896000	128880000	31094000	92726000	1	1	1	1	1	1	1	1	66	59	59	55	20	32	16	15
40S ribosomal protein S4-A OS=Saccharomyces cerevisiae (strain ATCC 204508 / S288c) OX=559292 GN=RPS4A PE=1 SV=1	P0CX35	RPS4A	29 kDa		unknown	1252800000	1200500000	1320000000	1314300000	1697500000	2412600000	1953400000	1533300000	1	1	1	1	1	1	1	1	52	53	54	57	30	33	29	17
Elongation factor 2 OS=Saccharomyces cerevisiae (strain ATCC 204508 / S288c) OX=559292 GN=EFT1 PE=1 SV=1	P32324	EFT1	93 kDa		unknown	70172000	81723000	103070000	72904000	23333000	62428000	53133000	77385000	1	1	1	1	1	1	1	1	58	65	68	58	12	25	20	17
Cluster of Pyruvate kinase 1 OS=Saccharomyces cerevisiae (strain ATCC 204508 / S288c) OX=559292 GN=CDC19 PE=1 SV=2 (P00549)	P00549 [2]	CDC19	55 kDa	TRUE	unknown	274810000	327930000	304300000	270740000	230670000	663320000	402720000	643440000	1	1	1	1	1	1	1	1	49	56	52	49	24	40	26	23
40S ribosomal protein S3 OS=Saccharomyces cerevisiae (strain ATCC 204508 / S288c) OX=559292 GN=RPS3 PE=1 SV=5	P05750	RPS3	27 kDa		unknown	2265300000	2560700000	2676300000	2195500000	2708900000	3219200000	2717100000	1838500000	1	1	1	1	1	1	1	1	53	60	56	57	23	24	27	15
60S ribosomal protein L5 OS=Saccharomyces cerevisiae (strain ATCC 204508 / S288c) OX=559292 GN=RPL5 PE=1 SV=4	P26321	RPL5	34 kDa		unknown	1751200000	1388400000	1151600000	1630400000	1686400000	2839600000	1364900000	1502300000	1	1	1	1	1	1	1	1	63	64	53	55	15	22	15	12
Cluster of Pyruvate decarboxylase isozyme 1 OS=Saccharomyces cerevisiae (strain ATCC 204508 / S288c) OX=559292 GN=PDC1 PE=1 SV=7 (P06169)	P06169 [3]	PDC1	61 kDa	TRUE	unknown	181240000	187620000	231850000	183060000	126350000	434190000	299340000	381990000	1	1	1	1	1	1	1	1	56	58	57	53	14	25	20	12
eIF-2-alpha kinase activator GCN1 OS=Saccharomyces cerevisiae (strain ATCC 204508 / S288c) OX=559292 GN=GCN1 PE=1 SV=1	P33892	GCN1	297 kDa		unknown	11898000	8152700	12873000	9821900	877270	5710200	4268800	3452200	1	1	1	1	1	1	1	1	63	58	62	65	6	18	16	10
Cluster of ATP-dependent RNA helicase DED1 OS=Saccharomyces cerevisiae (strain ATCC 204508 / S288c) OX=559292 GN=DED1 PE=1 SV=2 (P06634)	P06634 [2]	DED1	66 kDa	TRUE	unknown	152110000	129490000	183840000	142490000	54154000	143560000	84239000	70243000	1	1	1	1	1	1	1	1	56	58	58	49	15	28	15	13
60S ribosomal protein L12-A OS=Saccharomyces cerevisiae (strain ATCC 204508 / S288c) OX=559292 GN=RPL12A PE=1 SV=1	P0CX53	RPL12A	18 kDa		unknown	2896200000	2928200000	2748200000	2712500000	2260200000	1809200000	1347100000	1668100000	1	1	1	1	1	1	1	1	54	67	56	63	10	9	9	7
Cluster of 40S ribosomal protein S14-B OS=Saccharomyces cerevisiae (strain ATCC 204508 / S288c) OX=559292 GN=RPS14B PE=1 SV=2 (P39516)	P39516 [2]	RPS14B	15 kDa	TRUE	unknown	1364900000	1576000000	1145100000	1494500000	2473300000	2172200000	2094900000	2183500000	1	1	1	1	1	1	1	1	39	59	53	53	17	16	20	11
Cluster of 60S ribosomal protein L9-A OS=Saccharomyces cerevisiae (strain ATCC 204508 / S288c) OX=559292 GN=RPL9A PE=1 SV=2 (P05738)	P05738 [2]	RPL9A	22 kDa	TRUE	unknown	1793700000	1457800000	1773000000	1544900000	2405800000	2886000000	3868700000	3056100000	1	1	1	1	1	1	1	1	49	42	43	45	26	20	23	13
Elongation factor 1-alpha OS=Saccharomyces cerevisiae (strain ATCC 204508 / S288c) OX=559292 GN=TEF1 PE=1 SV=1	P02994	TEF1	50 kDa		unknown	590010000	573130000	943360000	632010000	420200000	1042600000	1154900000	1373300000	1	1	1	1	1	1	1	1	44	49	48	45	18	21	22	19
40S ribosomal protein S18-A OS=Saccharomyces cerevisiae (strain ATCC 204508 / S288c) OX=559292 GN=RPS18A PE=1 SV=1	P0CX55	RPS18A	17 kDa		unknown	2783100000	3217800000	3396100000	2964500000	3523700000	2569000000	3186300000	1995900000	1	1	1	1	1	1	1	1	44	63	53	46	17	16	14	11
Cluster of Ribosome-associated molecular chaperone SSB1 OS=Saccharomyces cerevisiae (strain ATCC 204508 / S288c) OX=559292 GN=SSB1 PE=1 SV=3 (P11484)	P11484 [2]	SSB1	67 kDa	TRUE	unknown	232870000	267750000	297790000	294440000	116550000	180320000	176780000	100350000	1	1	1	1	1	1	1	1	42	50	50	46	18	23	21	9
V-type proton ATPase subunit B OS=Saccharomyces cerevisiae (strain ATCC 204508 / S288c) OX=559292 GN=VMA2 PE=1 SV=2	P16140	VMA2	58 kDa		unknown	99686000	83582000	100560000	95936000	60359000	238460000	160130000	216570000	1	1	1	1	1	1	1	1	48	42	40	40	14	30	23	19
60S ribosomal protein L20-B OS=Saccharomyces cerevisiae (strain ATCC 204508 / S288c) OX=559292 GN=RPL20B PE=1 SV=1	P0CX24	RPL20B	20 kDa		unknown	2804800000	2147800000	2682400000	2593200000	4625100000	3168000000	3069200000	4509000000	1	1	1	1	1	1	1	1	38	47	42	38	24	23	20	18
Importin subunit beta-4 OS=Saccharomyces cerevisiae (strain ATCC 204508 / S288c) OX=559292 GN=KAP123 PE=1 SV=1	P40069	KAP123	123 kDa		unknown	53550000	52025000	77373000	58319000	34591000	101200000	84097000	83907000	1	1	1	1	1	1	1	1	41	37	41	42	16	25	23	19
60S acidic ribosomal protein P0 OS=Saccharomyces cerevisiae (strain ATCC 204508 / S288c) OX=559292 GN=RPP0 PE=1 SV=2	P05317	RPP0	34 kDa		unknown	3002800000	2822800000	2923400000	2891000000	3534300000	5300000000	4107900000	5394100000	1	1	1	1	1	1	1	1	38	53	43	46	15	17	18	14
Cluster of Glyceraldehyde-3-phosphate dehydrogenase 3 OS=Saccharomyces cerevisiae (strain ATCC 204508 / S288c) OX=559292 GN=TDH3 PE=1 SV=3 (P00359)	P00359 [3]	TDH3	36 kDa	TRUE	unknown	123770000	126320000	142080000	167670000	146770000	440560000	320240000	363620000	1	1	1	1	1	1	1	1	44	45	39	42	12	19	16	10
40S ribosomal protein S6-B OS=Saccharomyces cerevisiae (strain ATCC 204508 / S288c) OX=559292 GN=RPS6B PE=1 SV=1	P0CX38	RPS6B	27 kDa		unknown	1379000000	1353200000	1520800000	1585000000	2259400000	1580000000	1173900000	1026500000	1	1	1	1	1	1	1	1	34	38	38	36	20	24	20	15
60S ribosomal protein L6-A OS=Saccharomyces cerevisiae (strain ATCC 204508 / S288c) OX=559292 GN=RPL6A PE=1 SV=2	Q02326	RPL6A	20 kDa	TRUE	unknown	2759000000	2457600000	2432900000	2361600000	5971000000	4652200000	6018100000	7581200000	1	1	1	1	1	1	1	1	38	41	36	34	20	18	21	18
60S ribosomal protein L6-B OS=Saccharomyces cerevisiae (strain ATCC 204508 / S288c) OX=559292 GN=RPL6B PE=1 SV=4	P05739	RPL6B	20 kDa	TRUE	unknown	2380600000	2235100000	2118200000	2095800000	5060300000	4135600000	5269600000	6681100000	1	1	1	1	1	1	1	1	37	42	33	33	16	18	20	17
ATP-dependent 6-phosphofructokinase subunit alpha OS=Saccharomyces cerevisiae (strain ATCC 204508 / S288c) OX=559292 GN=PFK1 PE=1 SV=1	P16861	PFK1	108 kDa	TRUE	unknown	20621000	29541000	34675000	25344000	8796100	39860000	34416000	36560000	1	1	1	1	1	1	1	1	33	40	42	37	11	21	18	16
Cluster of Elongation factor 3A OS=Saccharomyces cerevisiae (strain ATCC 204508 / S288c) OX=559292 GN=YEF3 PE=1 SV=4 (P16521)	P16521 [2]	YEF3	116 kDa	TRUE	unknown	58638000	41798000	74529000	26171000	23275000	44718000	52350000	33844000	1	1	1	1	1	1	1	1	37	39	50	29	8	16	19	10
60S ribosomal protein L25 OS=Saccharomyces cerevisiae (strain ATCC 204508 / S288c) OX=559292 GN=RPL25 PE=1 SV=4	P04456	RPL25	16 kDa		unknown	2790400000	1797300000	1770600000	1923400000	2973600000	3880600000	4201500000	5973100000	1	1	1	1	1	1	1	1	37	40	36	31	17	16	18	11
Pentafunctional AROM polypeptide OS=Saccharomyces cerevisiae (strain ATCC 204508 / S288c) OX=559292 GN=ARO1 PE=1 SV=1	P08566	ARO1	175 kDa		unknown	13461000	11697000	18548000	16848000	3549300	15708000	14515000	16805000	1	1	1	1	1	1	1	1	36	35	40	42	8	16	14	13
60S ribosomal protein L10 OS=Saccharomyces cerevisiae (strain ATCC 204508 / S288c) OX=559292 GN=RPL10 PE=1 SV=1	P41805	RPL10	25 kDa		unknown	584860000	673950000	624510000	630480000	1171600000	1350500000	1178900000	1321800000	1	1	1	1	1	1	1	1	32	33	30	32	23	21	19	15
Cluster of 1,3-beta-glucan synthase component FKS1 OS=Saccharomyces cerevisiae (strain ATCC 204508 / S288c) OX=559292 GN=FKS1 PE=1 SV=2 (P38631)	P38631 [3]	FKS1	215 kDa	TRUE	unknown	19858000	13749000	21636000	22990000	2275300	11719000	7890700	2295800	1	1	1	1	1	1	1	1	39	35	48	53	4	14	10	3
Glutamine--fructose-6-phosphate aminotransferase [isomerizing] OS=Saccharomyces cerevisiae (strain ATCC 204508 / S288c) OX=559292 GN=GFA1 PE=1 SV=4	P14742	GFA1	80 kDa		unknown	39705000	39959000	35212000	31040000	23608000	76552000	47066000	51938000	1	1	1	1	1	1	1	1	35	38	37	33	11	20	18	11
Cluster of 40S ribosomal protein S0-A OS=Saccharomyces cerevisiae (strain ATCC 204508 / S288c) OX=559292 GN=RPS0A PE=1 SV=3 (P32905)	P32905 [2]	RPS0A	28 kDa	TRUE	unknown	2517600000	2685500000	2522500000	2180300000	2709300000	2553600000	2692000000	2273700000	1	1	1	1	1	1	1	1	41	35	38	39	12	16	13	6
40S ribosomal protein S24-A OS=Saccharomyces cerevisiae (strain ATCC 204508 / S288c) OX=559292 GN=RPS24A PE=1 SV=1	P0CX31	RPS24A	15 kDa		unknown	1432500000	1746500000	1626800000	1753400000	1287900000	1200100000	1318400000	947090000	1	1	1	1	1	1	1	1	32	44	34	38	14	14	14	8
60S ribosomal protein L7-A OS=Saccharomyces cerevisiae (strain ATCC 204508 / S288c) OX=559292 GN=RPL7A PE=1 SV=3	P05737	RPL7A	28 kDa		unknown	2331500000	2153200000	2326700000	2395400000	3321500000	1729700000	2228600000	1483500000	1	1	1	1	1	1	1	1	30	33	31	31	20	19	18	14
Cluster of S-adenosylmethionine synthase 1 OS=Saccharomyces cerevisiae (strain ATCC 204508 / S288c) OX=559292 GN=SAM1 PE=1 SV=2 (P10659)	P10659 [2]	SAM1	42 kDa	TRUE	unknown	99080000	79213000	104570000	118730000	139590000	303200000	278990000	533050000	1	1	1	1	1	1	1	1	33	29	36	30	10	19	15	14
40S ribosomal protein S22-A OS=Saccharomyces cerevisiae (strain ATCC 204508 / S288c) OX=559292 GN=RPS22A PE=1 SV=2	P0C0W1 (+1)	RPS22A	15 kDa		unknown	1197900000	1086100000	739750000	1183500000	1744700000	1673400000	1416100000	693070000	1	1	1	1	1	1	1	1	30	41	33	35	15	14	12	5
40S ribosomal protein S7-B OS=Saccharomyces cerevisiae (strain ATCC 204508 / S288c) OX=559292 GN=RPS7B PE=1 SV=1	P48164	RPS7B	22 kDa	TRUE	unknown	824190000	1010100000	1002800000	936110000	1327000000	1161100000	1350700000	1109100000	1	1	1	1	1	1	1	1	27	32	32	28	18	18	17	13
rRNA 2'-O-methyltransferase fibrillarin OS=Saccharomyces cerevisiae (strain ATCC 204508 / S288c) OX=559292 GN=NOP1 PE=1 SV=1	P15646	NOP1	34 kDa		unknown	215990000	220800000	218560000	217150000	9935600	26647000	7874700	11303000	1	1	1	1	1	1	1	1	40	45	43	44	2	5	2	2
40S ribosomal protein S9-B OS=Saccharomyces cerevisiae (strain ATCC 204508 / S288c) OX=559292 GN=RPS9B PE=1 SV=4	P05755	RPS9B	22 kDa		unknown	1507700000	1778900000	1722500000	1606400000	878780000	644960000	568450000	408780000	1	1	1	1	1	1	1	1	34	34	40	33	12	12	11	8
60S ribosomal protein L11-B OS=Saccharomyces cerevisiae (strain ATCC 204508 / S288c) OX=559292 GN=RPL11B PE=1 SV=3	Q3E757	RPL11B	20 kDa		unknown	1688000000	1561400000	1625600000	1460100000	4828200000	3588600000	5138000000	4879000000	1	1	1	1	1	1	1	1	34	36	38	28	10	12	12	10
40S ribosomal protein S17-A OS=Saccharomyces cerevisiae (strain ATCC 204508 / S288c) OX=559292 GN=RPS17A PE=1 SV=1	P02407 (+1)	RPS17A	16 kDa		unknown	3162300000	4106000000	3304300000	3714300000	1447500000	1235800000	973640000	677640000	1	1	1	1	1	1	1	1	31	35	30	30	12	13	14	8
60S ribosomal protein L2-B OS=Saccharomyces cerevisiae (strain ATCC 204508 / S288c) OX=559292 GN=RPL2B PE=1 SV=1	P0CX46	RPL2B	27 kDa		unknown	1078000000	1781300000	1137500000	1712200000	750010000	602120000	219680000	300880000	1	1	1	1	1	1	1	1	33	34	28	30	14	10	10	9
40S ribosomal protein S5 OS=Saccharomyces cerevisiae (strain ATCC 204508 / S288c) OX=559292 GN=RPS5 PE=1 SV=3	P26783	RPS5	25 kDa		unknown	1903800000	2134000000	2225400000	1986000000	3850000000	3493900000	6895500000	2262900000	1	1	1	1	1	1	1	1	21	25	27	28	17	18	21	13
Cluster of Enolase 2 OS=Saccharomyces cerevisiae (strain ATCC 204508 / S288c) OX=559292 GN=ENO2 PE=1 SV=2 (P00925)	P00925 [2]	ENO2	47 kDa	TRUE	unknown	58952000	58522000	74153000	64889000	30511000	104870000	87030000	107160000	1	1	1	1	1	1	1	1	28	31	30	26	8	18	11	16
60S ribosomal protein L16-B OS=Saccharomyces cerevisiae (strain ATCC 204508 / S288c) OX=559292 GN=RPL16B PE=1 SV=3	P26785	RPL16B	22 kDa	TRUE	unknown	1258800000	954030000	1341200000	1380100000	837630000	709620000	522360000	517080000	1	1	1	1	1	1	1	1	28	30	33	31	12	16	13	8
Acetolactate synthase catalytic subunit, mitochondrial OS=Saccharomyces cerevisiae (strain ATCC 204508 / S288c) OX=559292 GN=ILV2 PE=1 SV=1	P07342	ILV2	75 kDa		unknown	44653000	44274000	53507000	47298000	19525000	81806000	94430000	80174000	1	1	1	1	1	1	1	1	28	30	30	27	8	17	16	12
ATP synthase subunit beta, mitochondrial OS=Saccharomyces cerevisiae (strain ATCC 204508 / S288c) OX=559292 GN=ATP2 PE=1 SV=2	P00830	ATP2	55 kDa		unknown	133060000	87652000	123910000	98352000	82339000	158230000	132040000	157990000	1	1	1	1	1	1	1	1	30	26	29	28	11	17	11	13
V-type proton ATPase catalytic subunit A OS=Saccharomyces cerevisiae (strain ATCC 204508 / S288c) OX=559292 GN=VMA1 PE=1 SV=3	P17255	VMA1	119 kDa		unknown	16882000	15534000	21171000	23453000	9674700	23452000	20796000	17146000	1	1	1	1	1	1	1	1	26	29	24	30	11	19	14	9
60S ribosomal protein L14-B OS=Saccharomyces cerevisiae (strain ATCC 204508 / S288c) OX=559292 GN=RPL14B PE=1 SV=1	P38754	RPL14B	15 kDa		unknown	2292200000	1997100000	1640000000	1543200000	2003600000	2069200000	2027200000	2309500000	1	1	1	1	1	1	1	1	27	29	23	24	18	15	15	11
40S ribosomal protein S19-A OS=Saccharomyces cerevisiae (strain ATCC 204508 / S288c) OX=559292 GN=RPS19A PE=1 SV=2	P07280	RPS19A	16 kDa		unknown	843580000	1206500000	1162600000	1121000000	665650000	497770000	596020000	716560000	1	1	1	1	1	1	1	1	29	43	33	34	4	7	6	6
Cluster of 60S ribosomal protein L17-A OS=Saccharomyces cerevisiae (strain ATCC 204508 / S288c) OX=559292 GN=RPL17A PE=1 SV=4 (P05740)	P05740 [2]	RPL17A	21 kDa	TRUE	unknown	2597900000	2513200000	1724700000	2926000000	2747800000	1929600000	2961700000	2963600000	1	1	1	1	1	1	1	1	22	28	24	25	15	14	15	11
ATP-dependent RNA helicase DBP2 OS=Saccharomyces cerevisiae (strain ATCC 204508 / S288c) OX=559292 GN=DBP2 PE=1 SV=1	P24783	DBP2	61 kDa	TRUE	unknown	102550000	86822000	88758000	104360000	2074600	7117200	5527800	4033000	1	1	1	1	1	1	0.96	1	38	40	34	39	2	4	2	2
40S ribosomal protein S2 OS=Saccharomyces cerevisiae (strain ATCC 204508 / S288c) OX=559292 GN=RPS2 PE=1 SV=3	P25443	RPS2	27 kDa		unknown	1049600000	1216300000	1135200000	1335000000	37514000	12256000	34902000	0	1	1	1	1	1	1	1	0	35	38	35	36	3	3	4	0
Cluster of CTP synthase 1 OS=Saccharomyces cerevisiae (strain ATCC 204508 / S288c) OX=559292 GN=URA7 PE=1 SV=2 (P28274)	P28274 [2]	URA7	65 kDa	TRUE	unknown	42492000	42533000	41791000	27976000	4899200	61127000	44822000	28105000	1	1	1	1	1	1	1	1	27	33	31	26	3	16	14	8
60S ribosomal protein L28 OS=Saccharomyces cerevisiae (strain ATCC 204508 / S288c) OX=559292 GN=RPL28 PE=1 SV=3	P02406	RPL28	17 kDa		unknown	3019500000	3431900000	3258700000	3367200000	2245400000	1625100000	1690200000	2729000000	1	1	1	1	1	1	1	1	26	27	25	25	11	12	14	13
Mitochondrial protein import protein MAS5 OS=Saccharomyces cerevisiae (strain ATCC 204508 / S288c) OX=559292 GN=YDJ1 PE=1 SV=1	P25491	YDJ1	45 kDa		unknown	210690000	174200000	183730000	178110000	23651000	132510000	6300500	6673800	1	1	1	1	1	1	1	0.97	36	36	30	33	4	12	2	1
Eukaryotic translation initiation factor 3 subunit A OS=Saccharomyces cerevisiae (strain ATCC 204508 / S288c) OX=559292 GN=RPG1 PE=1 SV=1	P38249	RPG1	110 kDa		unknown	16863000	9922100	13979000	7754800	7103300	12979000	14956000	6466400	1	1	1	1	1	1	1	1	34	25	28	19	9	17	14	8
U3 small nucleolar RNA-associated protein 10 OS=Saccharomyces cerevisiae (strain ATCC 204508 / S288c) OX=559292 GN=UTP10 PE=1 SV=1	P42945	UTP10	200 kDa		unknown	11606000	6795300	11086000	6266800	1111600	2218900	3617700	1023600	1	1	1	1	1	1	1	1	39	30	37	28	5	5	8	2
40S ribosomal protein S8-B OS=Saccharomyces cerevisiae (strain ATCC 204508 / S288c) OX=559292 GN=RPS8B PE=1 SV=1	P0CX40	RPS8B	22 kDa		unknown	2279200000	2508300000	1857400000	2239100000	3195100000	2799000000	3100700000	3107500000	1	1	1	1	1	1	1	1	23	27	23	26	14	15	15	10
Cluster of 60S ribosomal protein L24-B OS=Saccharomyces cerevisiae (strain ATCC 204508 / S288c) OX=559292 GN=RPL24B PE=1 SV=1 (P24000)	P24000 [2]	RPL24B	18 kDa	TRUE	unknown	1593600000	1354300000	731860000	1382200000	1065600000	1429600000	1150400000	1162200000	1	1	1	1	1	1	1	1	28	28	27	25	8	12	10	8
Midasin OS=Saccharomyces cerevisiae (strain ATCC 204508 / S288c) OX=559292 GN=MDN1 PE=1 SV=1	Q12019	MDN1	559 kDa		unknown	1337900	1628500	1483400	1110500	38031	807980	76140	0	1	1	1	1	1	1	1	0	33	42	35	27	1	7	1	0
40S ribosomal protein S7-A OS=Saccharomyces cerevisiae (strain ATCC 204508 / S288c) OX=559292 GN=RPS7A PE=1 SV=4	P26786	RPS7A	22 kDa	TRUE	unknown	1205000000	1456000000	1516000000	1424200000	1848000000	1800200000	2223000000	1449900000	1	1	1	1	1	1	1	1	19	25	24	20	14	16	13	13
Nucleolar GTP-binding protein 1 OS=Saccharomyces cerevisiae (strain ATCC 204508 / S288c) OX=559292 GN=NOG1 PE=1 SV=1	Q02892	NOG1	74 kDa		unknown	74972000	59352000	64098000	63696000	15671000	19845000	2774800	4475100	1	1	1	1	1	1	1	1	28	27	33	31	11	9	2	2
60S ribosomal protein L22-A OS=Saccharomyces cerevisiae (strain ATCC 204508 / S288c) OX=559292 GN=RPL22A PE=1 SV=3	P05749	RPL22A	14 kDa	TRUE	unknown	970570000	1927300000	1363800000	1069000000	792310000	590560000	945550000	655930000	1	1	1	1	1	1	1	1	25	30	34	30	4	7	5	4
40S ribosomal protein S13 OS=Saccharomyces cerevisiae (strain ATCC 204508 / S288c) OX=559292 GN=RPS13 PE=1 SV=3	P05756	RPS13	17 kDa		unknown	2314700000	2709400000	2472700000	2437000000	2078200000	1748600000	2159200000	1300700000	1	1	1	1	1	1	1	1	26	30	24	24	11	10	11	6
Nuclear GTP-binding protein NUG1 OS=Saccharomyces cerevisiae (strain ATCC 204508 / S288c) OX=559292 GN=NUG1 PE=1 SV=1	P40010	NUG1	58 kDa		unknown	76261000	68138000	65218000	60796000	3815600	30777000	7743000	4020500	1	1	1	1	1	1	1	1	33	29	29	28	3	13	5	3
40S ribosomal protein S20 OS=Saccharomyces cerevisiae (strain ATCC 204508 / S288c) OX=559292 GN=RPS20 PE=1 SV=3	P38701	RPS20	14 kDa		unknown	1508400000	1447600000	1591600000	1800200000	2023900000	2517300000	2778500000	2380700000	1	1	1	1	1	1	1	1	25	19	22	23	12	13	12	7
Methionine--tRNA ligase, cytoplasmic OS=Saccharomyces cerevisiae (strain ATCC 204508 / S288c) OX=559292 GN=MES1 PE=1 SV=4	P00958	MES1	86 kDa		unknown	33093000	19425000	27315000	19613000	12606000	28259000	44722000	26377000	1	1	1	1	1	1	1	1	27	20	22	19	9	13	17	9
40S ribosomal protein S11-B OS=Saccharomyces cerevisiae (strain ATCC 204508 / S288c) OX=559292 GN=RPS11B PE=1 SV=1	P0CX48	RPS11B	18 kDa		unknown	1496500000	1633200000	1637300000	1582400000	3352900000	2852100000	3401800000	3774600000	1	1	1	1	1	1	1	1	20	18	20	19	15	16	16	14
ATP synthase subunit alpha, mitochondrial OS=Saccharomyces cerevisiae (strain ATCC 204508 / S288c) OX=559292 GN=ATP1 PE=1 SV=5	P07251	ATP1	59 kDa		unknown	57464000	52894000	85351000	70062000	42684000	73193000	79493000	176840000	1	1	1	1	1	1	1	1	21	23	25	22	9	15	13	10
40S ribosomal protein S12 OS=Saccharomyces cerevisiae (strain ATCC 204508 / S288c) OX=559292 GN=RPS12 PE=1 SV=1	P48589	RPS12	15 kDa		unknown	910530000	1210200000	1008800000	1033600000	439580000	733690000	360330000	517220000	1	1	1	1	1	1	1	1	25	26	25	26	8	11	6	4
Nucleolar GTP-binding protein 2 OS=Saccharomyces cerevisiae (strain ATCC 204508 / S288c) OX=559292 GN=NOG2 PE=1 SV=1	P53742	NOG2	55 kDa		unknown	33192000	33216000	30324000	28656000	21098000	50671000	32467000	54026000	1	1	1	1	1	1	1	1	22	24	23	21	9	14	12	12
Heat shock protein 60, mitochondrial OS=Saccharomyces cerevisiae (strain ATCC 204508 / S288c) OX=559292 GN=HSP60 PE=1 SV=1	P19882	HSP60	61 kDa		unknown	33118000	39758000	44423000	41745000	6402400	23266000	7719000	10783000	1	1	1	1	1	1	1	1	23	26	30	23	8	12	5	7
60S ribosomal protein L38 OS=Saccharomyces cerevisiae (strain ATCC 204508 / S288c) OX=559292 GN=RPL38 PE=1 SV=1	P49167	RPL38	9 kDa		unknown	1634100000	1477800000	1494200000	940760000	317240000	288330000	319250000	305830000	1	1	1	1	1	1	1	1	30	30	25	27	6	5	5	4
Cluster of ATP-dependent molecular chaperone HSC82 OS=Saccharomyces cerevisiae (strain ATCC 204508 / S288c) OX=559292 GN=HSC82 PE=1 SV=4 (P15108)	P15108 [2]	HSC82	81 kDa	TRUE	unknown	31759000	22289000	35728000	24648000	17321000	19453000	49500000	18095000	1	1	1	1	1	1	1	1	24	21	27	18	9	9	17	6
Flavohemoprotein OS=Saccharomyces cerevisiae (strain ATCC 204508 / S288c) OX=559292 GN=YHB1 PE=1 SV=2	P39676	YHB1	45 kDa		unknown	90309000	97223000	87242000	91532000	16482000	148190000	89667000	129230000	1	1	1	1	1	1	1	1	23	26	24	24	4	12	9	7
Cluster of 60S ribosomal protein L26-B OS=Saccharomyces cerevisiae (strain ATCC 204508 / S288c) OX=559292 GN=RPL26B PE=1 SV=2 (P53221)	P53221 [2]	RPL26B	14 kDa	TRUE	unknown	1594700000	1554600000	1673800000	1766500000	2601900000	2428000000	2394800000	2682600000	1	1	1	1	1	1	1	1	16	17	20	18	13	19	16	13
General negative regulator of transcription subunit 1 OS=Saccharomyces cerevisiae (strain ATCC 204508 / S288c) OX=559292 GN=CDC39 PE=1 SV=3	P25655	CDC39	240 kDa		unknown	3250900	3454800	3775400	3337200	175800	2290500	462310	539270	1	1	1	1	1	1	1	1	29	28	27	25	1	9	3	2
40S ribosomal protein S15 OS=Saccharomyces cerevisiae (strain ATCC 204508 / S288c) OX=559292 GN=RPS15 PE=1 SV=1	Q01855	RPS15	16 kDa		unknown	733910000	726590000	745380000	757900000	546320000	785480000	1001600000	260550000	1	1	1	1	1	1	1	1	27	26	24	22	10	9	7	5
60S ribosomal protein L16-A OS=Saccharomyces cerevisiae (strain ATCC 204508 / S288c) OX=559292 GN=RPL16A PE=1 SV=3	P26784	RPL16A	22 kDa	TRUE	unknown	931390000	686120000	1018800000	1044000000	670120000	545700000	546230000	492060000	1	1	1	1	1	1	1	1	20	26	23	22	10	10	10	8
Acetyl-CoA carboxylase OS=Saccharomyces cerevisiae (strain ATCC 204508 / S288c) OX=559292 GN=ACC1 PE=1 SV=2	Q00955	ACC1	250 kDa	TRUE	unknown	3649100	3670100	3775400	3161500	0	1440800	995220	427920	1	1	1	1	0	1	1	0.97	36	28	24	26	0	7	4	1
Mitochondrial phosphate carrier protein OS=Saccharomyces cerevisiae (strain ATCC 204508 / S288c) OX=559292 GN=MIR1 PE=1 SV=1	P23641	MIR1	33 kDa		unknown	176750000	170190000	210380000	162890000	20399000	104590000	65534000	40758000	1	1	1	1	1	1	1	1	23	27	27	21	5	9	9	3
Exportin-1 OS=Saccharomyces cerevisiae (strain ATCC 204508 / S288c) OX=559292 GN=CRM1 PE=1 SV=1	P30822	CRM1	124 kDa		unknown	12204000	14788000	15378000	12312000	7066300	14678000	10626000	9263800	1	1	1	1	1	1	1	1	23	24	19	23	7	10	7	5
60S ribosomal protein L43-B OS=Saccharomyces cerevisiae (strain ATCC 204508 / S288c) OX=559292 GN=RPL43B PE=1 SV=1	P0CX26	RPL43B	10 kDa		unknown	313240000	331650000	341860000	342880000	147620000	269810000	74242000	84440000	1	1	1	1	1	1	1	0.97	20	29	24	40	3	4	2	1
Nucleolar protein 56 OS=Saccharomyces cerevisiae (strain ATCC 204508 / S288c) OX=559292 GN=NOP56 PE=1 SV=1	Q12460	NOP56	57 kDa	TRUE	unknown	65369000	54908000	86018000	51444000	643190	18311000	8373600	2525400	1	1	1	1	0.97	1	1	0.97	29	27	30	27	1	5	4	1
Cluster of 40S ribosomal protein S21-B OS=Saccharomyces cerevisiae (strain ATCC 204508 / S288c) OX=559292 GN=RPS21B PE=1 SV=1 (Q3E754)	Q3E754 [2]	RPS21B	10 kDa	TRUE	unknown	571020000	663770000	648000000	454100000	108400000	52030000	147730000	0	1	1	1	1	1	1	1	0.79	24	29	26	25	6	5	6	1
Ubiquitin-40S ribosomal protein S31 OS=Saccharomyces cerevisiae (strain ATCC 204508 / S288c) OX=559292 GN=RPS31 PE=1 SV=3	P05759	RPS31	17 kDa		unknown	571700000	614340000	668940000	650740000	613250000	538650000	790990000	905090000	1	1	1	1	1	1	1	1	21	19	26	25	6	7	6	6
Protein APA1 OS=Saccharomyces cerevisiae (strain ATCC 204508 / S288c) OX=559292 GN=APA1 PE=1 SV=4	P16550	APA1	36 kDa		unknown	86108000	63574000	151720000	81782000	24650000	124060000	133950000	110660000	1	1	1	1	1	1	1	1	21	15	26	21	4	10	13	7
Suppressor protein STM1 OS=Saccharomyces cerevisiae (strain ATCC 204508 / S288c) OX=559292 GN=STM1 PE=1 SV=3	P39015	STM1	30 kDa		unknown	392850000	471390000	387970000	565600000	0	1430500	0	0	1	1	1	1	0	0.92	0.55	0	26	34	26	28	0	1	1	0
40S ribosomal protein S16-B OS=Saccharomyces cerevisiae (strain ATCC 204508 / S288c) OX=559292 GN=RPS16B PE=1 SV=1	P0CX52	RPS16B	16 kDa		unknown	1557300000	1754300000	1743600000	1540600000	1704200000	1387500000	1378400000	1015100000	1	1	1	1	1	1	1	1	20	21	17	19	11	13	10	3
60S ribosomal protein L35-B OS=Saccharomyces cerevisiae (strain ATCC 204508 / S288c) OX=559292 GN=RPL35B PE=1 SV=1	P0CX85	RPL35B	14 kDa		unknown	2210500000	2404500000	2600500000	2485000000	2357300000	1911000000	1853600000	2227200000	1	1	1	1	1	1	1	1	16	15	16	16	14	14	14	10
NAD-dependent malic enzyme, mitochondrial OS=Saccharomyces cerevisiae (strain ATCC 204508 / S288c) OX=559292 GN=MAE1 PE=1 SV=1	P36013	MAE1	74 kDa		unknown	23720000	19237000	20333000	20090000	10191000	33428000	10930000	8016000	1	1	1	1	1	1	1	1	24	22	21	21	6	12	6	3
RuvB-like protein 1 OS=Saccharomyces cerevisiae (strain ATCC 204508 / S288c) OX=559292 GN=RVB1 PE=1 SV=1	Q03940	RVB1	50 kDa		unknown	41806000	30702000	28984000	42476000	19816000	61353000	11321000	21516000	1	1	1	1	1	1	1	1	22	19	16	21	9	15	6	6
Cell division control protein 48 OS=Saccharomyces cerevisiae (strain ATCC 204508 / S288c) OX=559292 GN=CDC48 PE=1 SV=3	P25694	CDC48	92 kDa		unknown	10974000	13755000	16063000	17412000	2027900	5419400	4678700	11002000	1	1	1	1	1	1	1	1	20	27	23	24	3	5	5	7
Ribosomal RNA-processing protein 12 OS=Saccharomyces cerevisiae (strain ATCC 204508 / S288c) OX=559292 GN=RRP12 PE=1 SV=1	Q12754	RRP12	138 kDa		unknown	11425000	8715500	14468000	8733200	219210	1122400	0	0	1	1	1	1	0.85	0.99	0	0	27	26	28	25	1	2	0	0
rRNA biogenesis protein RRP5 OS=Saccharomyces cerevisiae (strain ATCC 204508 / S288c) OX=559292 GN=RRP5 PE=1 SV=1	Q05022	RRP5	193 kDa		unknown	5773100	3597700	5928000	4460600	0	0	0	2613700	1	1	1	1	0	0	0	0.46	28	22	31	25	0	0	0	1
60S ribosomal protein L30 OS=Saccharomyces cerevisiae (strain ATCC 204508 / S288c) OX=559292 GN=RPL30 PE=1 SV=3	P14120	RPL30	11 kDa		unknown	1423800000	1201200000	1384400000	1153500000	1008600000	1147200000	1540600000	1294700000	1	1	1	1	1	1	1	1	22	19	19	18	7	7	10	6
Signal recognition particle subunit SRP68 OS=Saccharomyces cerevisiae (strain ATCC 204508 / S288c) OX=559292 GN=SRP68 PE=1 SV=1	P38687	SRP68	69 kDa		unknown	21085000	23914000	20999000	17856000	13240000	29356000	19894000	25105000	1	1	1	1	1	1	1	1	18	20	20	19	8	11	7	6
T-complex protein 1 subunit theta OS=Saccharomyces cerevisiae (strain ATCC 204508 / S288c) OX=559292 GN=CCT8 PE=1 SV=1	P47079	CCT8	62 kDa		unknown	27438000	27918000	23640000	26276000	12344000	42220000	22647000	30245000	1	1	1	1	1	1	1	1	18	22	16	21	5	11	7	8
Ribosome biogenesis protein ERB1 OS=Saccharomyces cerevisiae (strain ATCC 204508 / S288c) OX=559292 GN=ERB1 PE=1 SV=1	Q04660	ERB1	92 kDa		unknown	33255000	25853000	25656000	28778000	17378000	13681000	5340300	2504000	1	1	1	1	1	1	1	1	24	21	17	21	10	7	5	1
60S ribosomal protein L19-B OS=Saccharomyces cerevisiae (strain ATCC 204508 / S288c) OX=559292 GN=RPL19B PE=1 SV=1	P0CX83	RPL19B	22 kDa		unknown	2420400000	1965600000	2076300000	2320600000	996880000	1133100000	654890000	1020100000	1	1	1	1	1	1	1	1	18	17	17	17	9	12	8	9
Cluster of 60S ribosomal protein L15-A OS=Saccharomyces cerevisiae (strain ATCC 204508 / S288c) OX=559292 GN=RPL15A PE=1 SV=3 (P05748)	P05748 [2]	RPL15A	24 kDa	TRUE	unknown	2356100000	2199900000	2310100000	2168200000	707830000	637160000	203860000	0	1	1	1	1	1	1	1	1	18	20	20	19	7	9	5	2
Nucleolar protein 58 OS=Saccharomyces cerevisiae (strain ATCC 204508 / S288c) OX=559292 GN=NOP58 PE=1 SV=1	Q12499	NOP58	57 kDa	TRUE	unknown	40474000	40416000	53206000	39810000	3327500	17957000	14421000	6176500	1	1	1	1	1	1	1	1	20	19	21	19	2	8	7	4
Tubulin beta chain OS=Saccharomyces cerevisiae (strain ATCC 204508 / S288c) OX=559292 GN=TUB2 PE=1 SV=2	P02557	TUB2	51 kDa		unknown	67949000	57772000	72440000	50425000	38000000	69185000	96188000	107600000	1	1	1	1	1	1	1	1	20	18	18	13	5	7	8	6
Importin subunit beta-1 OS=Saccharomyces cerevisiae (strain ATCC 204508 / S288c) OX=559292 GN=KAP95 PE=1 SV=1	Q06142	KAP95	95 kDa		unknown	21298000	22046000	20108000	24490000	7869700	25724000	28906000	33226000	1	1	1	1	1	1	1	1	19	19	19	15	4	7	7	8
H/ACA ribonucleoprotein complex subunit CBF5 OS=Saccharomyces cerevisiae (strain ATCC 204508 / S288c) OX=559292 GN=CBF5 PE=1 SV=1	P33322	CBF5	55 kDa		unknown	57800000	51317000	82078000	54738000	0	646180	0	-1	1	1	1	1	0	0.35	0	0	22	26	27	21	0	1	0	0
60S ribosomal protein L27-A OS=Saccharomyces cerevisiae (strain ATCC 204508 / S288c) OX=559292 GN=RPL27A PE=1 SV=1	P0C2H6	RPL27A	16 kDa		unknown	2770900000	2756800000	3102400000	2911800000	4623600000	3766800000	4424000000	5494400000	1	1	1	1	1	1	1	1	12	13	13	14	12	11	13	10
Cluster of Alcohol dehydrogenase 1 OS=Saccharomyces cerevisiae (strain ATCC 204508 / S288c) OX=559292 GN=ADH1 PE=1 SV=5 (P00330)	P00330 [3]	ADH1	37 kDa	TRUE	unknown	86947000	109030000	109920000	106270000	44423000	153400000	172650000	195830000	1	1	1	1	1	1	1	1	14	16	13	14	7	13	12	8
Essential nuclear protein 1 OS=Saccharomyces cerevisiae (strain ATCC 204508 / S288c) OX=559292 GN=ENP1 PE=1 SV=1	P38333	ENP1	55 kDa		unknown	22500000	17753000	24264000	19988000	4101300	11839000	9898900	6056900	1	1	1	1	1	1	1	1	18	18	18	19	4	8	6	3
Cluster of 60S ribosomal protein L13-B OS=Saccharomyces cerevisiae (strain ATCC 204508 / S288c) OX=559292 GN=RPL13B PE=1 SV=1 (P40212)	P40212 [2]	RPL13B	23 kDa	TRUE	unknown	1659700000	1086400000	1308800000	1634900000	371860000	310520000	172290000	0	1	1	1	1	1	1	1	1	18	19	13	19	8	6	6	4
Probable metalloprotease ARX1 OS=Saccharomyces cerevisiae (strain ATCC 204508 / S288c) OX=559292 GN=ARX1 PE=1 SV=1	Q03862	ARX1	65 kDa		unknown	34825000	38230000	24876000	31729000	0	458090	0	0	1	1	1	1	0	0.84	0	0	23	29	20	21	0	1	0	0
Phosphoglycerate mutase 1 OS=Saccharomyces cerevisiae (strain ATCC 204508 / S288c) OX=559292 GN=GPM1 PE=1 SV=3	P00950	GPM1	28 kDa		unknown	112770000	134050000	111700000	89793000	25075000	123950000	52024000	93118000	1	1	1	1	1	1	1	1	17	18	16	18	4	9	6	6
DNA-directed RNA polymerases I and III subunit RPAC1 OS=Saccharomyces cerevisiae (strain ATCC 204508 / S288c) OX=559292 GN=RPC40 PE=1 SV=1	P07703	RPC40	38 kDa		unknown	23838000	28384000	31179000	32827000	17931000	63686000	52039000	49332000	1	1	1	1	1	1	1	1	13	17	15	18	6	11	10	6
ADP,ATP carrier protein 2 OS=Saccharomyces cerevisiae (strain ATCC 204508 / S288c) OX=559292 GN=PET9 PE=1 SV=2	P18239	PET9	34 kDa	TRUE	unknown	47113000	31179000	58862000	71287000	11451000	16816000	16301000	25134000	1	1	1	1	1	1	1	1	17	18	22	21	5	4	4	4
ATP-dependent RNA helicase DBP3 OS=Saccharomyces cerevisiae (strain ATCC 204508 / S288c) OX=559292 GN=DBP3 PE=1 SV=2	P20447	DBP3	59 kDa		unknown	27526000	25661000	42570000	32506000	3468400	7968500	11938000	7089000	1	1	1	1	1	1	1	1	20	20	21	18	2	5	6	2
Pyruvate dehydrogenase E1 component subunit alpha, mitochondrial OS=Saccharomyces cerevisiae (strain ATCC 204508 / S288c) OX=559292 GN=PDA1 PE=1 SV=2	P16387	PDA1	46 kDa		unknown	52838000	38414000	58330000	74580000	-1	11083000	916980	8071300	1	1	1	1	0	1	0.63	1	19	17	22	25	0	5	1	3
U3 small nucleolar RNA-associated protein 20 OS=Saccharomyces cerevisiae (strain ATCC 204508 / S288c) OX=559292 GN=UTP20 PE=1 SV=3	P35194	UTP20	288 kDa		unknown	2552300	2101200	3921900	2046000	0	126120	0	0	1	1	1	1	0	1	0	0.15	22	21	30	21	0	1	0	0
Pescadillo homolog OS=Saccharomyces cerevisiae (strain ATCC 204508 / S288c) OX=559292 GN=NOP7 PE=1 SV=1	P53261	NOP7	70 kDa		unknown	37362000	35699000	38749000	34172000	4846500	7223900	893260	932400	1	1	1	1	1	1	0.86	0.97	20	21	21	22	4	4	1	1
Ribosome biogenesis protein MAK21 OS=Saccharomyces cerevisiae (strain ATCC 204508 / S288c) OX=559292 GN=MAK21 PE=1 SV=1	Q12176	MAK21	117 kDa		unknown	13211000	9684600	13449000	11811000	0	0	0	0	1	1	1	1	0	0	0	0	25	22	23	22	0	0	0	0
Cluster of 60S ribosomal protein L36-A OS=Saccharomyces cerevisiae (strain ATCC 204508 / S288c) OX=559292 GN=RPL36A PE=1 SV=3 (P05745)	P05745 [2]	RPL36A	11 kDa	TRUE	unknown	1918200000	1902800000	1318400000	1026900000	118300000	207210000	62317000	207170000	1	1	1	1	1	1	1	1	20	23	17	15	3	6	3	4
Clustered mitochondria protein 1 OS=Saccharomyces cerevisiae (strain ATCC 204508 / S288c) OX=559292 GN=CLU1 PE=1 SV=1	Q03690	CLU1	145 kDa		unknown	4551400	5106400	4291100	3252300	1200500	2478600	1720600	0	1	1	1	1	1	1	1	0.1	19	22	18	17	2	8	3	0
Glutamate--tRNA ligase, cytoplasmic OS=Saccharomyces cerevisiae (strain ATCC 204508 / S288c) OX=559292 GN=GUS1 PE=1 SV=3	P46655	GUS1	81 kDa		unknown	5075500	6758100	15729000	9045400	0	1720100	6139300	0	1	1	1	1	0	1	1	0	15	18	27	21	0	3	8	0
Eukaryotic translation initiation factor 3 subunit C OS=Saccharomyces cerevisiae (strain ATCC 204508 / S288c) OX=559292 GN=NIP1 PE=1 SV=2	P32497	NIP1	93 kDa		unknown	15442000	11156000	10031000	9321000	3301500	14369000	10961000	3015300	1	1	1	1	1	1	1	0.98	19	17	14	17	4	8	8	1
T-complex protein 1 subunit delta OS=Saccharomyces cerevisiae (strain ATCC 204508 / S288c) OX=559292 GN=CCT4 PE=1 SV=2	P39078	CCT4	58 kDa		unknown	16395000	27549000	26687000	23193000	4482500	19994000	3454100	7447000	1	1	1	1	1	1	1	1	14	21	16	16	3	7	5	3
Signal recognition particle subunit SRP72 OS=Saccharomyces cerevisiae (strain ATCC 204508 / S288c) OX=559292 GN=SRP72 PE=1 SV=2	P38688	SRP72	74 kDa		unknown	18979000	19417000	17669000	17531000	4617600	20950000	7325900	9362100	1	1	1	1	1	1	1	1	16	20	16	17	3	9	4	3
60S ribosomal protein L31-A OS=Saccharomyces cerevisiae (strain ATCC 204508 / S288c) OX=559292 GN=RPL31A PE=1 SV=1	P0C2H8	RPL31A	13 kDa		unknown	2564600000	2475400000	2449800000	2454400000	1152200000	1101900000	683590000	786850000	1	1	1	1	1	1	1	1	19	17	17	17	7	8	2	3
Tubulin alpha-3 chain OS=Saccharomyces cerevisiae (strain ATCC 204508 / S288c) OX=559292 GN=TUB3 PE=1 SV=1	P09734	TUB3	50 kDa	TRUE	unknown	32654000	29792000	32841000	28099000	35979000	86963000	78677000	116830000	1	1	1	1	1	1	1	1	14	16	14	13	6	11	7	8
Obg-like ATPase 1 OS=Saccharomyces cerevisiae (strain ATCC 204508 / S288c) OX=559292 GN=OLA1 PE=1 SV=1	P38219	OLA1	44 kDa		unknown	39154000	37456000	51537000	33281000	0	11948000	14735000	0	1	1	1	1	0.99	1	1	0	20	19	22	17	1	4	4	0
ATP-dependent RNA helicase HAS1 OS=Saccharomyces cerevisiae (strain ATCC 204508 / S288c) OX=559292 GN=HAS1 PE=1 SV=1	Q03532	HAS1	57 kDa		unknown	19398000	27539000	22342000	22272000	7736900	6405000	1162900	1395600	1	1	1	1	1	1	1	0.97	20	20	14	20	5	5	1	1
60S ribosomal export protein NMD3 OS=Saccharomyces cerevisiae (strain ATCC 204508 / S288c) OX=559292 GN=NMD3 PE=1 SV=3	P38861	NMD3	59 kDa		unknown	41733000	38739000	35277000	42146000	-1	0	-1	-1	1	1	1	1	0	0.88	0	0	23	20	19	24	0	1	0	0
Ribosome biogenesis protein YTM1 OS=Saccharomyces cerevisiae (strain ATCC 204508 / S288c) OX=559292 GN=YTM1 PE=1 SV=1	Q12024	YTM1	51 kDa		unknown	29981000	26340000	28526000	24175000	21134000	18113000	16770000	19354000	1	1	1	1	1	1	1	1	18	15	15	14	7	6	5	4
40S ribosomal protein S23-B OS=Saccharomyces cerevisiae (strain ATCC 204508 / S288c) OX=559292 GN=RPS23B PE=1 SV=1	P0CX30	RPS23B	16 kDa		unknown	640080000	709710000	685770000	640430000	672380000	517210000	413820000	450490000	1	1	1	1	1	1	1	1	16	20	18	16	4	3	3	4
Glutamate synthase [NADH] OS=Saccharomyces cerevisiae (strain ATCC 204508 / S288c) OX=559292 GN=GLT1 PE=1 SV=2	Q12680	GLT1	238 kDa		unknown	2381800	2395000	1281600	2074300	356590	2501700	1785800	1114400	1	1	1	1	1	1	1	1	17	19	11	16	3	9	7	3
U3 small nucleolar RNA-associated protein 22 OS=Saccharomyces cerevisiae (strain ATCC 204508 / S288c) OX=559292 GN=UTP22 PE=1 SV=1	P53254	UTP22	140 kDa		unknown	8078400	4110800	6197100	4630100	0	0	0	0	1	1	1	1	0	0	0	0	29	18	20	15	0	0	0	0
Eukaryotic translation initiation factor 3 subunit B OS=Saccharomyces cerevisiae (strain ATCC 204508 / S288c) OX=559292 GN=PRT1 PE=1 SV=1	P06103	PRT1	88 kDa		unknown	11432000	8655500	13192000	6873100	3665000	6157900	16515000	8472200	1	1	1	1	1	1	1	1	15	15	17	12	3	6	9	6
Actin OS=Saccharomyces cerevisiae (strain ATCC 204508 / S288c) OX=559292 GN=ACT1 PE=1 SV=1	P60010	ACT1	42 kDa		unknown	18667000	21006000	23820000	15300000	28142000	71502000	25549000	88108000	1	1	1	1	1	1	1	1	11	13	12	11	8	11	8	8
Isocitrate dehydrogenase [NAD] subunit 1, mitochondrial OS=Saccharomyces cerevisiae (strain ATCC 204508 / S288c) OX=559292 GN=IDH1 PE=1 SV=2	P28834	IDH1	39 kDa		unknown	44423000	57012000	34362000	48488000	5006500	100400000	35358000	76586000	1	1	1	1	1	1	1	1	15	15	12	15	2	9	7	7
Mannose-1-phosphate guanyltransferase OS=Saccharomyces cerevisiae (strain ATCC 204508 / S288c) OX=559292 GN=PSA1 PE=1 SV=2	P41940	PSA1	40 kDa		unknown	18131000	77000000	31539000	91483000	1202400	95453000	23745000	194940000	1	1	1	1	0.98	1	1	1	10	18	14	18	1	9	4	9
Eukaryotic translation initiation factor 5A-1 OS=Saccharomyces cerevisiae (strain ATCC 204508 / S288c) OX=559292 GN=HYP2 PE=1 SV=3	P23301	HYP2	17 kDa	TRUE	unknown	286150000	297060000	365300000	330730000	-1	-1	-1	-1	1	1	1	1	0	0	0	0	21	22	21	19	0	0	0	0
60S ribosomal protein L18-A OS=Saccharomyces cerevisiae (strain ATCC 204508 / S288c) OX=559292 GN=RPL18A PE=1 SV=1	P0CX49	RPL18A	21 kDa		unknown	1135500000	1092300000	1159600000	770890000	237120000	210200000	170680000	188740000	1	1	1	1	1	1	1	1	15	14	14	15	5	6	5	5
Translation initiation factor eIF-2B subunit epsilon OS=Saccharomyces cerevisiae (strain ATCC 204508 / S288c) OX=559292 GN=GCD6 PE=1 SV=1	P32501	GCD6	81 kDa		unknown	9378600	7594000	8661400	7821800	6359800	18492000	8388100	5826300	1	1	1	1	1	1	1	1	13	14	13	13	4	12	7	3
60S ribosomal protein L32 OS=Saccharomyces cerevisiae (strain ATCC 204508 / S288c) OX=559292 GN=RPL32 PE=1 SV=1	P38061	RPL32	15 kDa		unknown	1061700000	885040000	940290000	1316900000	972940000	796390000	863890000	697900000	1	1	1	1	1	1	1	1	12	16	12	12	7	8	6	7
Cluster of Elongation factor 1-gamma 2 OS=Saccharomyces cerevisiae (strain ATCC 204508 / S288c) OX=559292 GN=TEF4 PE=1 SV=1 (P36008)	P36008 [2]	TEF4	47 kDa	TRUE	unknown	36928000	61681000	64452000	38403000	10258000	88898000	67964000	81611000	1	1	1	1	1	1	1	1	11	16	16	12	2	10	9	7
Tubulin alpha-1 chain OS=Saccharomyces cerevisiae (strain ATCC 204508 / S288c) OX=559292 GN=TUB1 PE=1 SV=2	P09733	TUB1	50 kDa	TRUE	unknown	38011000	35138000	47204000	36787000	37314000	67180000	94685000	103810000	1	1	1	1	1	1	1	1	12	14	13	14	5	9	8	6
Coatomer subunit alpha OS=Saccharomyces cerevisiae (strain ATCC 204508 / S288c) OX=559292 GN=COP1 PE=1 SV=2	P53622	COP1	136 kDa		unknown	7105000	3698500	8317200	2962900	539220	1481500	1906800	373060	1	1	1	1	1	1	1	0.89	20	16	20	12	2	4	4	1
Cluster of 60S ribosomal protein L21-A OS=Saccharomyces cerevisiae (strain ATCC 204508 / S288c) OX=559292 GN=RPL21A PE=1 SV=1 (Q02753)	Q02753 [2]	RPL21A	18 kDa	TRUE	unknown	1783200000	1457900000	1742000000	1536900000	727710000	887950000	373410000	644670000	1	1	1	1	1	1	1	1	14	10	10	15	8	8	4	6
DNA topoisomerase 2 OS=Saccharomyces cerevisiae (strain ATCC 204508 / S288c) OX=559292 GN=TOP2 PE=1 SV=2	P06786	TOP2	164 kDa		unknown	5050000	2863200	3276500	3827800	0	0	0	0	1	1	1	1	0	0	0	0	24	18	16	21	0	0	0	0
Ribosome assembly factor MRT4 OS=Saccharomyces cerevisiae (strain ATCC 204508 / S288c) OX=559292 GN=MRT4 PE=1 SV=1	P33201	MRT4	27 kDa		unknown	72263000	72986000	78448000	64961000	43910000	139680000	142930000	151510000	1	1	1	1	1	1	1	1	12	11	13	11	4	10	10	6
ATP-dependent 6-phosphofructokinase subunit beta OS=Saccharomyces cerevisiae (strain ATCC 204508 / S288c) OX=559292 GN=PFK2 PE=1 SV=4	P16862	PFK2	105 kDa	TRUE	unknown	5657700	7989400	6407200	4217900	946830	8469000	3202200	5213800	1	1	1	1	0.98	1	1	1	14	16	15	12	1	9	5	3
NET1-associated nuclear protein 1 OS=Saccharomyces cerevisiae (strain ATCC 204508 / S288c) OX=559292 GN=NAN1 PE=1 SV=1	Q02931	NAN1	101 kDa		unknown	11014000	5057800	10987000	7575600	1630700	2277500	6993800	1051600	1	1	1	1	1	1	1	0.84	19	12	18	18	3	2	5	1
RNA cytidine acetyltransferase OS=Saccharomyces cerevisiae (strain ATCC 204508 / S288c) OX=559292 GN=KRE33 PE=1 SV=1	P53914	KRE33	119 kDa		unknown	7936200	4904000	6692300	4765900	-1	0	0	0	1	1	1	1	0	0	0	0	22	17	22	16	0	0	0	0
RNA-binding protein SRO9 OS=Saccharomyces cerevisiae (strain ATCC 204508 / S288c) OX=559292 GN=SRO9 PE=1 SV=2	P25567	SRO9	48 kDa		unknown	32429000	26706000	32565000	21853000	1461200	1965100	0	0	1	1	1	1	0.57	1	0	0	19	19	18	17	1	2	0	0
V-type proton ATPase subunit a, vacuolar isoform OS=Saccharomyces cerevisiae (strain ATCC 204508 / S288c) OX=559292 GN=VPH1 PE=1 SV=3	P32563	VPH1	96 kDa		unknown	7592000	4029600	20546000	38435000	-1	4050100	897270	0	1	1	1	1	0	1	1	0	14	9	20	26	0	4	2	0
RuvB-like protein 2 OS=Saccharomyces cerevisiae (strain ATCC 204508 / S288c) OX=559292 GN=RVB2 PE=1 SV=1	Q12464	RVB2	52 kDa		unknown	19005000	12936000	7819900	13710000	5474800	23982000	5183700	13397000	1	1	1	1	1	1	1	1	15	13	11	17	3	9	3	4
Coatomer subunit beta OS=Saccharomyces cerevisiae (strain ATCC 204508 / S288c) OX=559292 GN=SEC26 PE=1 SV=2	P41810	SEC26	109 kDa		unknown	7900800	5071600	9320600	4486700	2815500	5377200	5631400	2040000	1	1	1	1	1	1	1	1	13	13	16	10	4	7	5	3
Cluster of Import motor subunit, mitochondrial OS=Saccharomyces cerevisiae (strain ATCC 204508 / S288c) OX=559292 GN=SSC1 PE=1 SV=1 (P0CS90)	P0CS90 [2]	SSC1	71 kDa	TRUE	unknown	16104000	17332000	20235000	19854000	0	4094500	0	3454800	1	1	1	1	0.86	1	1	1	15	18	16	17	1	4	1	2
Cluster of 60S ribosomal protein L33-A OS=Saccharomyces cerevisiae (strain ATCC 204508 / S288c) OX=559292 GN=RPL33A PE=1 SV=3 (P05744)	P05744 [2]	RPL33A	12 kDa	TRUE	unknown	1128000000	952230000	994910000	1587100000	1314100000	1025400000	1132400000	1302300000	1	1	1	1	1	1	1	1	12	9	11	11	9	8	7	5
ATP-dependent RNA helicase MSS116, mitochondrial OS=Saccharomyces cerevisiae (strain ATCC 204508 / S288c) OX=559292 GN=MSS116 PE=1 SV=1	P15424	MSS116	76 kDa		unknown	14695000	14268000	11144000	12854000	0	0	0	0	1	1	1	1	0	0	0	0	15	19	19	19	0	0	0	0
Coatomer subunit beta' OS=Saccharomyces cerevisiae (strain ATCC 204508 / S288c) OX=559292 GN=SEC27 PE=1 SV=1	P41811	SEC27	99 kDa		unknown	8351900	7627700	9755900	6552400	4344600	9500600	4974500	2497500	1	1	1	1	1	1	1	1	13	13	14	12	5	8	5	3
Adenosylhomocysteinase OS=Saccharomyces cerevisiae (strain ATCC 204508 / S288c) OX=559292 GN=SAH1 PE=1 SV=1	P39954	SAH1	49 kDa		unknown	18515000	30638000	27105000	31589000	3741500	56918000	16174000	58767000	1	1	1	1	1	1	1	1	9	12	10	12	3	11	5	7
40S ribosomal protein S28-A OS=Saccharomyces cerevisiae (strain ATCC 204508 / S288c) OX=559292 GN=RPS28A PE=1 SV=1	Q3E7X9	RPS28A	8 kDa		unknown	1318700000	1616900000	1140800000	1497500000	325750000	48332000	350820000	234890000	1	1	1	1	1	1	1	1	13	18	14	15	3	2	4	2
Importin subunit beta-3 OS=Saccharomyces cerevisiae (strain ATCC 204508 / S288c) OX=559292 GN=PSE1 PE=1 SV=2	P32337	PSE1	121 kDa		unknown	5584000	4547600	7687000	3553400	708950	2584200	18453000	0	1	1	1	1	1	1	1	0.14	17	13	15	14	2	4	5	0
Dihydrolipoyllysine-residue acetyltransferase component of pyruvate dehydrogenase complex, mitochondrial OS=Saccharomyces cerevisiae (strain ATCC 204508 / S288c) OX=559292 GN=LAT1 PE=1 SV=1	P12695	LAT1	52 kDa		unknown	55585000	27581000	50204000	68316000	22992000	15419000	10470000	29323000	1	1	1	1	1	1	1	1	12	10	14	16	6	5	3	5
Phosphoglycerate kinase OS=Saccharomyces cerevisiae (strain ATCC 204508 / S288c) OX=559292 GN=PGK1 PE=1 SV=2	P00560	PGK1	45 kDa		unknown	21744000	15697000	28798000	29797000	2641700	8862800	3939900	3151800	1	1	1	1	1	1	1	1	15	12	14	18	2	3	2	3
T-complex protein 1 subunit gamma OS=Saccharomyces cerevisiae (strain ATCC 204508 / S288c) OX=559292 GN=CCT3 PE=1 SV=2	P39077	CCT3	59 kDa		unknown	8157100	7466300	8433100	9394300	873350	4795600	5147400	4787400	1	1	1	1	1	1	1	1	14	13	12	13	3	5	4	4
T-complex protein 1 subunit zeta OS=Saccharomyces cerevisiae (strain ATCC 204508 / S288c) OX=559292 GN=CCT6 PE=1 SV=1	P39079	CCT6	60 kDa		unknown	9154900	11361000	10585000	10114000	1978900	14132000	8016500	5947200	1	1	1	1	0.98	1	1	1	12	14	15	13	1	5	6	3
ABC transporter ATP-binding protein ARB1 OS=Saccharomyces cerevisiae (strain ATCC 204508 / S288c) OX=559292 GN=ARB1 PE=1 SV=1	P40024	ARB1	68 kDa		unknown	38674000	16674000	22449000	18024000	-1	1794100	720380	0	1	1	1	1	0	1	0.97	0.17	22	14	15	14	0	2	1	0
Importin beta SMX1 OS=Saccharomyces cerevisiae (strain ATCC 204508 / S288c) OX=559292 GN=SXM1 PE=1 SV=1	Q04175	SXM1	108 kDa		unknown	8576800	6040300	13705000	7823500	1958700	7683500	5694900	2059600	1	1	1	1	1	1	1	1	10	11	18	11	3	8	4	2
DNA-directed RNA polymerase II subunit RPB2 OS=Saccharomyces cerevisiae (strain ATCC 204508 / S288c) OX=559292 GN=RPB2 PE=1 SV=2	P08518	RPB2	139 kDa		unknown	5161100	4430800	5560400	3402800	463510	5054200	1157900	1151800	1	1	1	1	1	1	1	1	15	12	13	12	1	8	4	2
Protein SCP160 OS=Saccharomyces cerevisiae (strain ATCC 204508 / S288c) OX=559292 GN=SCP160 PE=1 SV=3	P06105	SCP160	135 kDa		unknown	36678000	4354800	4328200	46007000	0	115090	0	0	1	1	1	1	0.06	0.97	0	0	14	20	18	15	0	1	0	0
Isocitrate dehydrogenase [NAD] subunit 2, mitochondrial OS=Saccharomyces cerevisiae (strain ATCC 204508 / S288c) OX=559292 GN=IDH2 PE=1 SV=1	P28241	IDH2	40 kDa		unknown	48188000	58551000	40466000	41793000	8101500	68736000	41733000	100010000	1	1	1	1	1	1	1	1	12	15	11	8	2	5	4	6
Proteasome-interacting protein CIC1 OS=Saccharomyces cerevisiae (strain ATCC 204508 / S288c) OX=559292 GN=CIC1 PE=1 SV=1	P38779	CIC1	43 kDa		unknown	20603000	23685000	28977000	31496000	16244000	38296000	9038100	0	1	1	1	1	1	1	1	0	13	14	13	13	4	6	4	0
MICOS complex subunit MIC60 OS=Saccharomyces cerevisiae (strain ATCC 204508 / S288c) OX=559292 GN=MIC60 PE=1 SV=1	P36112	MIC60	61 kDa		unknown	11427000	10431000	12404000	7062400	949640	2948000	3840200	0	1	1	1	1	0.27	1	1	0	15	14	17	11	1	3	4	0
rDNA transcriptional regulator POL5 OS=Saccharomyces cerevisiae (strain ATCC 204508 / S288c) OX=559292 GN=POL5 PE=1 SV=1	P39985	POL5	116 kDa		unknown	5396400	5830200	6319600	4184200	0	0	0	0	1	1	1	1	0	0	0	0	17	16	17	14	0	0	0	0
Nucleolar complex protein 2 OS=Saccharomyces cerevisiae (strain ATCC 204508 / S288c) OX=559292 GN=NOC2 PE=1 SV=2	P39744	NOC2	82 kDa		unknown	8919200	12380000	12411000	13424000	0	0	0	0	1	1	1	1	0	0	0	0	14	20	16	15	0	0	0	0
Nucleolar pre-ribosomal-associated protein 1 OS=Saccharomyces cerevisiae (strain ATCC 204508 / S288c) OX=559292 GN=URB1 PE=1 SV=2	P34241	URB1	203 kDa		unknown	1807600	2014300	2232400	1492200	0	265510	150950	3103700	1	1	1	1	0	1	1	0.99	14	14	16	14	0	2	1	1
Eukaryotic translation initiation factor 5B OS=Saccharomyces cerevisiae (strain ATCC 204508 / S288c) OX=559292 GN=FUN12 PE=1 SV=2	P39730	FUN12	112 kDa		unknown	8997600	7054200	14283000	8786200	0	0	0	0	1	1	1	1	0	0	0	0	18	12	19	14	0	0	0	0
Cluster of Long-chain-fatty-acid--CoA ligase 4 OS=Saccharomyces cerevisiae (strain ATCC 204508 / S288c) OX=559292 GN=FAA4 PE=1 SV=1 (P47912)	P47912 [2]	FAA4	77 kDa	TRUE	unknown	15378000	16256000	17850000	13408000	3475100	6994100	2904400	1520500	1	1	1	1	1	1	1	1	13	13	13	12	3	5	3	2
Long-chain-fatty-acid--CoA ligase 1 OS=Saccharomyces cerevisiae (strain ATCC 204508 / S288c) OX=559292 GN=FAA1 PE=1 SV=1	P30624	FAA1	78 kDa		unknown	8539600	10086000	6075700	6141300	171140	5073000	1126600	759870	1	1	1	1	0.93	1	0.99	0.96	12	17	11	14	1	5	2	1
Glycine--tRNA ligase 1, mitochondrial OS=Saccharomyces cerevisiae (strain ATCC 204508 / S288c) OX=559292 GN=GRS1 PE=1 SV=3	P38088	GRS1	78 kDa		unknown	6325800	5386500	7410500	7192700	0	6196200	4032600	1466200	1	1	1	1	0	1	1	1	13	11	11	13	0	7	6	1
Cluster of Pleiotropic ABC efflux transporter of multiple drugs OS=Saccharomyces cerevisiae (strain ATCC 204508 / S288c) OX=559292 GN=PDR5 PE=1 SV=1 (P33302)	P33302 [3]	PDR5	170 kDa	TRUE	unknown	2728200	2370300	5051100	5403200	0	2042700	2089600	0	1	1	1	1	0	1	1	0.98	10	9	15	19	0	5	4	1
Mitochondrial import receptor subunit TOM70 OS=Saccharomyces cerevisiae (strain ATCC 204508 / S288c) OX=559292 GN=TOM70 PE=1 SV=2	P07213	TOM70	70 kDa		unknown	6683800	9001400	14770000	9904200	0	2670700	2016200	0	1	1	1	1	0	1	1	0.3	12	15	16	14	0	3	1	0
Mitochondrial outer membrane protein porin 1 OS=Saccharomyces cerevisiae (strain ATCC 204508 / S288c) OX=559292 GN=POR1 PE=1 SV=4	P04840	POR1	30 kDa		unknown	40841000	10597000	131650000	235240000	730460	-1	0	0	1	1	1	1	0.84	0	0.07	0	13	6	20	23	1	0	0	0
Cytochrome b-c1 complex subunit 2, mitochondrial OS=Saccharomyces cerevisiae (strain ATCC 204508 / S288c) OX=559292 GN=QCR2 PE=1 SV=1	P07257	QCR2	40 kDa		unknown	7269900	3233700	24078000	53681000	-1	0	0	-1	1	1	1	1	0	0	0	0	12	7	20	24	0	0	0	0
27S pre-rRNA (guanosine(2922)-2'-O)-methyltransferase OS=Saccharomyces cerevisiae (strain ATCC 204508 / S288c) OX=559292 GN=SPB1 PE=1 SV=2	P25582	SPB1	96 kDa		unknown	11253000	9260200	9439100	11917000	-1	0	0	0	1	1	1	1	0	0	0	0	15	15	16	17	0	0	0	0
3-isopropylmalate dehydratase OS=Saccharomyces cerevisiae (strain ATCC 204508 / S288c) OX=559292 GN=LEU1 PE=1 SV=3	P07264	LEU1	86 kDa		unknown	2886300	1879700	6319500	3482700	999740	8547000	24219000	23528000	1	1	1	1	0.99	1	1	1	8	4	10	10	2	9	10	9
Magnesium-activated aldehyde dehydrogenase, cytosolic OS=Saccharomyces cerevisiae (strain ATCC 204508 / S288c) OX=559292 GN=ALD6 PE=1 SV=4	P54115	ALD6	54 kDa		unknown	4658700	9634500	7336200	9424100	663560	10627000	4503100	1967300	1	1	1	1	0.83	1	1	0.97	11	15	12	14	1	5	3	1
Pyruvate dehydrogenase E1 component subunit beta, mitochondrial OS=Saccharomyces cerevisiae (strain ATCC 204508 / S288c) OX=559292 GN=PDB1 PE=1 SV=2	P32473	PDB1	40 kDa		unknown	102400000	88242000	140200000	148070000	0	10202000	8874500	33742000	1	1	1	1	0	1	1	1	12	12	16	13	0	4	2	4
Translation initiation factor eIF-2B subunit gamma OS=Saccharomyces cerevisiae (strain ATCC 204508 / S288c) OX=559292 GN=GCD1 PE=1 SV=3	P09032	GCD1	66 kDa		unknown	10615000	6814800	7995900	7442700	0	9692800	1936600	2099300	1	1	1	1	0	1	1	0.98	16	11	13	11	0	6	2	1
Protein translocation protein SEC63 OS=Saccharomyces cerevisiae (strain ATCC 204508 / S288c) OX=559292 GN=SEC63 PE=1 SV=2	P14906	SEC63	75 kDa		unknown	7992100	7034500	18699000	18644000	0	421970	1038300	0	1	1	1	1	0	0.93	0.82	0	13	11	20	16	0	1	1	0
DNA replication licensing factor MCM4 OS=Saccharomyces cerevisiae (strain ATCC 204508 / S288c) OX=559292 GN=MCM4 PE=1 SV=2	P30665	MCM4	105 kDa		unknown	2844400	2372100	2026500	2017200	1043200	7965700	3485200	2786800	1	1	1	1	1	1	1	1	10	11	8	7	3	10	6	3
40S ribosomal protein S10-A OS=Saccharomyces cerevisiae (strain ATCC 204508 / S288c) OX=559292 GN=RPS10A PE=1 SV=1	Q08745	RPS10A	13 kDa		unknown	1078100000	1272200000	822510000	970700000	688210000	541750000	537910000	398210000	1	1	1	1	1	1	1	1	10	16	11	12	3	4	2	2
Protein transport protein SEC7 OS=Saccharomyces cerevisiae (strain ATCC 204508 / S288c) OX=559292 GN=SEC7 PE=1 SV=2	P11075	SEC7	227 kDa		unknown	2758300	1481400	2418700	1532400	137800	154840	390980	0	1	1	1	1	0.62	0.97	1	0	20	11	14	11	1	1	2	0
25S rRNA (cytosine(2870)-C(5))-methyltransferase OS=Saccharomyces cerevisiae (strain ATCC 204508 / S288c) OX=559292 GN=NOP2 PE=1 SV=1	P40991	NOP2	70 kDa		unknown	29338000	15391000	17171000	18861000	0	0	-1	-1	1	1	1	1	0.18	0	0	0	18	13	13	15	0	0	0	0
Polyadenylate-binding protein, cytoplasmic and nuclear OS=Saccharomyces cerevisiae (strain ATCC 204508 / S288c) OX=559292 GN=PAB1 PE=1 SV=4	P04147	PAB1	64 kDa		unknown	7657700	9988500	18283000	10775000	508330	5195200	12672000	3373800	1	1	1	1	0.43	1	1	0.97	10	13	14	11	1	3	6	1
Nonsense-mediated mRNA decay protein 5 OS=Saccharomyces cerevisiae (strain ATCC 204508 / S288c) OX=559292 GN=NMD5 PE=1 SV=2	P46970	NMD5	120 kDa		unknown	4503300	5593200	5500200	3264000	0	1789500	1869400	-1	1	1	1	1	0	1	1	0	14	15	14	10	0	3	3	0
T-complex protein 1 subunit epsilon OS=Saccharomyces cerevisiae (strain ATCC 204508 / S288c) OX=559292 GN=CCT5 PE=1 SV=3	P40413	CCT5	62 kDa		unknown	7030100	7412100	6579200	8892000	3204800	16384000	13254000	18862000	1	1	1	1	1	1	1	1	8	8	6	11	3	8	7	7
Nucleolar protein 4 OS=Saccharomyces cerevisiae (strain ATCC 204508 / S288c) OX=559292 GN=NOP4 PE=1 SV=1	P37838	NOP4	78 kDa		unknown	11401000	7919400	14024000	8269700	0	2078800	799890	7135400	1	1	1	1	0	1	0.93	0.4	17	11	15	10	0	3	1	1
Dihydrolipoyl dehydrogenase, mitochondrial OS=Saccharomyces cerevisiae (strain ATCC 204508 / S288c) OX=559292 GN=LPD1 PE=1 SV=1	P09624	LPD1	54 kDa		unknown	9329700	12830000	13117000	21934000	0	697410	0	0	1	1	1	1	0	0.63	0.05	0.7	11	15	12	18	0	1	0	0
60S acidic ribosomal protein P2-beta OS=Saccharomyces cerevisiae (strain ATCC 204508 / S288c) OX=559292 GN=RPP2B PE=1 SV=2	P02400	RPP2B	11 kDa		unknown	460580000	535870000	358370000	354290000	90149000	73953000	66821000	123630000	1	1	1	1	1	1	1	1	9	10	11	9	3	4	4	4
U3 small nucleolar RNA-associated protein MPP10 OS=Saccharomyces cerevisiae (strain ATCC 204508 / S288c) OX=559292 GN=MPP10 PE=1 SV=1	P47083	MPP10	67 kDa		unknown	8769400	3678500	10003000	3217000	0	0	0	0	1	1	1	1	0	0.86	0	0.9	18	11	16	9	0	0	0	0
40S ribosomal protein S25-B OS=Saccharomyces cerevisiae (strain ATCC 204508 / S288c) OX=559292 GN=RPS25B PE=1 SV=1	P0C0T4 (+1)	RPS25B	12 kDa		unknown	767470000	809830000	777220000	777550000	518150000	549220000	537750000	590040000	1	1	1	1	1	1	1	1	8	14	10	9	4	4	4	3
Serine palmitoyltransferase 1 OS=Saccharomyces cerevisiae (strain ATCC 204508 / S288c) OX=559292 GN=LCB1 PE=1 SV=2	P25045	LCB1	62 kDa		unknown	8582400	9421100	8913000	12339000	4157800	21510000	10761000	5546300	1	1	1	1	0.97	1	1	1	9	10	10	12	1	8	3	2
Sulfite reductase [NADPH] flavoprotein component OS=Saccharomyces cerevisiae (strain ATCC 204508 / S288c) OX=559292 GN=MET10 PE=1 SV=2	P39692	MET10	115 kDa		unknown	2890400	2423200	2152100	2267700	0	2738500	262270	1262700	1	1	1	1	0.49	1	0.96	1	13	12	9	10	1	6	1	2
Phosphatidylinositol 4-kinase STT4 OS=Saccharomyces cerevisiae (strain ATCC 204508 / S288c) OX=559292 GN=STT4 PE=1 SV=1	P37297	STT4	215 kDa		unknown	1657300	1060200	1392700	838740	0	0	0	0	1	1	1	1	0	0.79	0	0	15	16	14	10	0	0	0	0
Fructose-bisphosphate aldolase OS=Saccharomyces cerevisiae (strain ATCC 204508 / S288c) OX=559292 GN=FBA1 PE=1 SV=3	P14540	FBA1	40 kDa		unknown	21701000	21614000	34790000	38745000	8298500	48090000	25854000	23849000	1	1	1	1	1	1	1	1	8	9	10	12	2	7	3	3
Translation initiation factor eIF-2B subunit beta OS=Saccharomyces cerevisiae (strain ATCC 204508 / S288c) OX=559292 GN=GCD7 PE=1 SV=1	P32502	GCD7	43 kDa		unknown	15299000	13697000	15010000	15470000	10346000	17719000	19572000	14695000	1	1	1	1	1	1	1	1	8	9	11	11	4	5	3	2
Endoplasmic reticulum chaperone BiP OS=Saccharomyces cerevisiae (strain ATCC 204508 / S288c) OX=559292 GN=KAR2 PE=1 SV=1	P16474	KAR2	74 kDa	TRUE	unknown	29652000	26246000	31736000	28957000	7555400	26605000	26400000	32732000	1	1	1	1	0.42	1	1	1	9	12	11	9	1	5	4	3
Clathrin heavy chain OS=Saccharomyces cerevisiae (strain ATCC 204508 / S288c) OX=559292 GN=CHC1 PE=1 SV=1	P22137	CHC1	187 kDa		unknown	1455300	1982800	2301200	1613800	257120	772180	932970	774310	1	1	1	1	1	1	1	0.3	12	13	12	10	1	2	3	1
DNA-directed RNA polymerase III subunit RPC2 OS=Saccharomyces cerevisiae (strain ATCC 204508 / S288c) OX=559292 GN=RET1 PE=1 SV=2	P22276	RET1	129 kDa		unknown	3311000	2691900	2398000	2872300	0	449080	0	-1	1	1	1	1	0	1	0	0	14	13	13	13	0	1	0	0
[NU+] prion formation protein 1 OS=Saccharomyces cerevisiae (strain ATCC 204508 / S288c) OX=559292 GN=NEW1 PE=1 SV=1	Q08972	NEW1	134 kDa		unknown	2204100	1306000	3724100	1486200	0	0	-1	0	1	1	1	1	0	0	0	0	15	11	17	11	0	0	0	0
Cluster of NADP-specific glutamate dehydrogenase 1 OS=Saccharomyces cerevisiae (strain ATCC 204508 / S288c) OX=559292 GN=GDH1 PE=1 SV=2 (P07262)	P07262 [2]	GDH1	50 kDa	TRUE	unknown	6736300	12475000	5935600	9570000	370330	9089500	0	1510500	1	1	1	1	1	1	1	1	8	16	8	10	2	6	1	2
Cluster of High-affinity hexose transporter HXT7 OS=Saccharomyces cerevisiae (strain ATCC 204508 / S288c) OX=559292 GN=HXT7 PE=1 SV=1 (P39004)	P39004 [2]	HXT7	63 kDa	TRUE	unknown	20959000	17599000	19961000	28331000	0	10063000	10461000	14368000	1	1	1	1	0.98	1	1	1	10	9	9	14	2	5	3	2
FK506-binding protein 4 OS=Saccharomyces cerevisiae (strain ATCC 204508 / S288c) OX=559292 GN=FPR4 PE=1 SV=1	Q06205	FPR4	44 kDa	TRUE	unknown	72541000	61655000	83011000	70409000	1662300	15655000	9446800	10332000	1	1	1	1	0.97	1	1	0.98	12	11	11	12	1	3	2	1
U3 small nucleolar RNA-associated protein 8 OS=Saccharomyces cerevisiae (strain ATCC 204508 / S288c) OX=559292 GN=UTP8 PE=1 SV=1	P53276	UTP8	80 kDa		unknown	11843000	6803300	13142000	7024300	630550	1578600	670360	0	1	1	1	1	0.53	0.46	0.87	0	13	11	14	12	1	1	1	0
Ribosome biogenesis protein BMS1 OS=Saccharomyces cerevisiae (strain ATCC 204508 / S288c) OX=559292 GN=BMS1 PE=1 SV=1	Q08965	BMS1	136 kDa		unknown	5856800	2655700	6222600	2601900	0	0	0	0	1	1	1	1	0	0	0	0	18	9	16	11	0	0	0	0
Cytochrome b-c1 complex subunit 1, mitochondrial OS=Saccharomyces cerevisiae (strain ATCC 204508 / S288c) OX=559292 GN=COR1 PE=1 SV=1	P07256	COR1	50 kDa		unknown	5969200	1564700	18867000	51736000	0	0	-1	0	1	1	1	1	0	0	0	0	10	5	16	22	0	0	0	0
DNA-directed RNA polymerase I subunit RPA135 OS=Saccharomyces cerevisiae (strain ATCC 204508 / S288c) OX=559292 GN=RPA135 PE=1 SV=1	P22138	RPA135	136 kDa		unknown	2811000	2255800	2831700	2839400	1175400	1523200	964930	0	1	1	1	1	0.96	1	0.97	0	11	13	11	12	1	4	1	0
Ribosome biogenesis ATPase RIX7 OS=Saccharomyces cerevisiae (strain ATCC 204508 / S288c) OX=559292 GN=RIX7 PE=1 SV=1	Q07844	RIX7	93 kDa		unknown	4427100	5419600	5211200	3540800	0	339580	659020	0	1	1	1	1	0	1	1	0	12	14	10	10	0	1	2	0
Acetyl-coenzyme A synthetase 2 OS=Saccharomyces cerevisiae (strain ATCC 204508 / S288c) OX=559292 GN=ACS2 PE=1 SV=1	P52910	ACS2	75 kDa		unknown	7030800	7059000	5210400	7869900	3131300	17010000	6854900	8462600	1	1	1	1	1	1	1	1	7	7	6	9	5	8	5	3
Histone H4 OS=Saccharomyces cerevisiae (strain ATCC 204508 / S288c) OX=559292 GN=HHF1 PE=1 SV=2	P02309	HHF1	11 kDa		unknown	593980000	392050000	627460000	274970000	96098000	68265000	78409000	0	1	1	1	1	1	1	1	0	10	8	11	9	5	3	5	0
Serine palmitoyltransferase 2 OS=Saccharomyces cerevisiae (strain ATCC 204508 / S288c) OX=559292 GN=LCB2 PE=1 SV=1	P40970	LCB2	63 kDa		unknown	6929000	9095600	11879000	6936300	0	9160500	6499200	3094900	1	1	1	1	0	1	1	0.88	12	10	10	8	0	5	3	1
DNA-directed RNA polymerase I subunit RPA190 OS=Saccharomyces cerevisiae (strain ATCC 204508 / S288c) OX=559292 GN=RPA190 PE=1 SV=2	P10964	RPA190	186 kDa		unknown	944850	1671000	2030900	1452100	0	992030	146450	0	1	1	1	1	0	1	0.99	0.81	8	14	9	13	0	4	2	0
Cluster of Myosin-2 OS=Saccharomyces cerevisiae (strain ATCC 204508 / S288c) OX=559292 GN=MYO2 PE=1 SV=1 (P19524)	P19524 [2]	MYO2	181 kDa	TRUE	unknown	1343500	737220	1405800	790040	0	581330	0	0	1	1	1	1	0	1	0.38	0	12	10	15	9	0	3	0	0
Protein SDA1 OS=Saccharomyces cerevisiae (strain ATCC 204508 / S288c) OX=559292 GN=SDA1 PE=1 SV=1	P53313	SDA1	87 kDa		unknown	8902800	6936800	10194000	6368900	0	454210	0	0	1	1	1	1	0	0.97	0	0	12	12	14	11	0	1	0	0
Ribosome-interacting GTPase 1 OS=Saccharomyces cerevisiae (strain ATCC 204508 / S288c) OX=559292 GN=RBG1 PE=1 SV=1	P39729	RBG1	41 kDa		unknown	38823000	8143500	31901000	8482200	0	0	0	-1	1	1	1	1	0	0.93	0	0	15	10	16	10	0	1	0	0
26S proteasome regulatory subunit 8 homolog OS=Saccharomyces cerevisiae (strain ATCC 204508 / S288c) OX=559292 GN=RPT6 PE=1 SV=4	Q01939	RPT6	45 kDa		unknown	13916000	11654000	10462000	9416300	7002200	21364000	16942000	11482000	1	1	1	1	0.87	1	1	1	10	8	9	8	3	4	6	2
Multisite-specific tRNA:(cytosine-C(5))-methyltransferase OS=Saccharomyces cerevisiae (strain ATCC 204508 / S288c) OX=559292 GN=NCL1 PE=1 SV=1	P38205	NCL1	78 kDa		unknown	4223100	5649400	7298500	6782200	0	-1	-1	0	1	1	1	1	0	0	0	0	9	13	14	13	0	0	0	0
26S proteasome regulatory subunit 6B homolog OS=Saccharomyces cerevisiae (strain ATCC 204508 / S288c) OX=559292 GN=RPT3 PE=1 SV=2	P33298	RPT3	48 kDa	TRUE	unknown	10632000	5877900	7251300	6046400	6293200	13469000	9213000	8546600	1	1	1	1	0.14	1	1	1	11	8	8	9	2	5	4	3
Something about silencing protein 10 OS=Saccharomyces cerevisiae (strain ATCC 204508 / S288c) OX=559292 GN=SAS10 PE=1 SV=1	Q12136	SAS10	70 kDa		unknown	7904500	4305000	6586800	5488200	0	1808000	1133100	1274100	1	1	1	1	0.12	1	0.99	0.54	14	10	11	10	0	2	1	1
ATP-dependent RNA helicase MAK5 OS=Saccharomyces cerevisiae (strain ATCC 204508 / S288c) OX=559292 GN=MAK5 PE=1 SV=1	P38112	MAK5	87 kDa		unknown	8070600	3901100	10626000	6170800	-1	0	0	-1	1	1	1	1	0	0	0	0	14	9	14	11	0	0	0	0
Ran GTPase-activating protein 1 OS=Saccharomyces cerevisiae (strain ATCC 204508 / S288c) OX=559292 GN=RNA1 PE=1 SV=2	P11745	RNA1	46 kDa		unknown	9739200	8032700	11224000	8024900	3274700	9016300	11796000	7322800	1	1	1	1	1	1	1	0.99	10	10	7	8	3	3	6	2
ATP-dependent RNA helicase eIF4A OS=Saccharomyces cerevisiae (strain ATCC 204508 / S288c) OX=559292 GN=TIF1 PE=1 SV=3	P10081	TIF1	45 kDa		unknown	9532500	9923400	16007000	7909700	1488100	2564400	417340	1400100	1	1	1	1	1	1	0.97	0.98	11	10	13	9	2	2	1	1
Ribosome biogenesis protein BRX1 OS=Saccharomyces cerevisiae (strain ATCC 204508 / S288c) OX=559292 GN=BRX1 PE=1 SV=2	Q08235	BRX1	34 kDa		unknown	43416000	41157000	39145000	49885000	0	8749200	1178800	4182000	1	1	1	1	0	1	0.81	1	12	10	9	12	0	2	1	2
Periodic tryptophan protein 2 OS=Saccharomyces cerevisiae (strain ATCC 204508 / S288c) OX=559292 GN=PWP2 PE=1 SV=2	P25635	PWP2	104 kDa		unknown	6688400	3212000	6472800	2946600	400370	408250	514560	0	1	1	1	1	0.88	0.97	0.37	0	14	10	13	7	1	1	1	0
Coatomer subunit gamma OS=Saccharomyces cerevisiae (strain ATCC 204508 / S288c) OX=559292 GN=SEC21 PE=1 SV=2	P32074	SEC21	105 kDa		unknown	4050000	3010300	6162900	4279100	-1	-1	0	0	1	1	1	1	0	0	0.05	0.35	12	10	12	13	0	0	0	1
C-1-tetrahydrofolate synthase, mitochondrial OS=Saccharomyces cerevisiae (strain ATCC 204508 / S288c) OX=559292 GN=MIS1 PE=1 SV=1	P09440	MIS1	106 kDa		unknown	3308500	4214600	4729100	4790500	-1	0	0	0	1	1	1	1	0	0	0	0	11	13	11	12	0	0	0	0
26S proteasome regulatory subunit RPN1 OS=Saccharomyces cerevisiae (strain ATCC 204508 / S288c) OX=559292 GN=RPN1 PE=1 SV=3	P38764	RPN1	109 kDa		unknown	1489200	898730	3010700	2347000	1929600	3803400	3625600	1199300	1	1	1	1	1	1	1	1	6	5	9	9	3	6	5	2
Mitochondrial oxaloacetate transport protein OS=Saccharomyces cerevisiae (strain ATCC 204508 / S288c) OX=559292 GN=OAC1 PE=1 SV=1	P32332	OAC1	35 kDa		unknown	37014000	35867000	79790000	46774000	4320100	16238000	7904700	9825200	1	1	1	1	1	1	1	1	10	8	10	8	2	5	2	2
Cluster of Succinate dehydrogenase [ubiquinone] flavoprotein subunit, mitochondrial OS=Saccharomyces cerevisiae (strain ATCC 204508 / S288c) OX=559292 GN=SDH1 PE=1 SV=1 (Q00711)	Q00711 [2]	SDH1	70 kDa	TRUE	unknown	4263400	6587100	1517700	3394900	0	7763800	6856700	5369400	1	1	1	1	0.97	1	1	1	8	13	6	8	1	4	4	2
Glucose-6-phosphate isomerase OS=Saccharomyces cerevisiae (strain ATCC 204508 / S288c) OX=559292 GN=PGI1 PE=1 SV=3	P12709	PGI1	61 kDa		unknown	8111100	11252000	7055600	9290200	1011900	7915300	2734600	6451900	1	1	1	1	0.97	1	1	1	9	11	8	8	1	5	2	3
T-complex protein 1 subunit eta OS=Saccharomyces cerevisiae (strain ATCC 204508 / S288c) OX=559292 GN=CCT7 PE=1 SV=1	P42943	CCT7	60 kDa		unknown	4165800	4250100	3898300	4657400	414090	3183800	4761600	4164800	1	1	1	1	0.86	1	1	1	9	9	8	10	1	4	3	3
ATP-dependent permease PDR12 OS=Saccharomyces cerevisiae (strain ATCC 204508 / S288c) OX=559292 GN=PDR12 PE=1 SV=1	Q02785	PDR12	171 kDa	TRUE	unknown	1127100	2150600	2088000	2426700	94662	393170	372710	0	1	1	1	1	0.95	1	0.98	0.16	8	12	10	12	1	1	1	0
DnaJ homolog 1, mitochondrial OS=Saccharomyces cerevisiae (strain ATCC 204508 / S288c) OX=559292 GN=MDJ1 PE=1 SV=1	P35191	MDJ1	56 kDa		unknown	13553000	10728000	10820000	10252000	889300	0	-1	-1	1	1	1	1	0.97	0	0	0	12	12	9	13	1	0	0	0
Serine hydroxymethyltransferase, mitochondrial OS=Saccharomyces cerevisiae (strain ATCC 204508 / S288c) OX=559292 GN=SHM1 PE=1 SV=2	P37292	SHM1	54 kDa	TRUE	unknown	5636900	7123400	12854000	9829900	0	0	0	0	1	1	1	1	0	0	0	0	9	12	14	12	0	0	0	0
Protein transport protein SEC13 OS=Saccharomyces cerevisiae (strain ATCC 204508 / S288c) OX=559292 GN=SEC13 PE=1 SV=1	Q04491	SEC13	33 kDa		unknown	14777000	14269000	12232000	13382000	1204700	10549000	7532100	2544400	1	1	1	1	1	1	1	0.79	10	10	7	9	1	4	3	1
Protein MSS51, mitochondrial OS=Saccharomyces cerevisiae (strain ATCC 204508 / S288c) OX=559292 GN=MSS51 PE=1 SV=2	P32335	MSS51	51 kDa		unknown	5723000	3948300	8429200	5074500	2983200	3996300	5912900	6351900	1	1	1	1	1	1	1	1	8	7	8	8	3	3	4	3
Eukaryotic translation initiation factor 3 subunit I OS=Saccharomyces cerevisiae (strain ATCC 204508 / S288c) OX=559292 GN=TIF34 PE=1 SV=1	P40217	TIF34	39 kDa		unknown	11940000	9406300	12784000	6130900	4654200	10914000	11724000	2413500	1	1	1	1	1	1	1	0.94	9	8	7	7	3	5	5	1
3-keto-steroid reductase OS=Saccharomyces cerevisiae (strain ATCC 204508 / S288c) OX=559292 GN=ERG27 PE=1 SV=1	Q12452	ERG27	40 kDa		unknown	19172000	14896000	17954000	13851000	4716400	16055000	6917200	1957400	1	1	1	1	1	1	1	0.52	10	8	8	8	3	4	2	1
Cluster of Low-affinity glucose transporter HXT3 OS=Saccharomyces cerevisiae (strain ATCC 204508 / S288c) OX=559292 GN=HXT3 PE=1 SV=1 (P32466)	P32466 [2]	HXT3	63 kDa	TRUE	unknown	11491000	7110900	17874000	14573000	0	16486000	8843300	0	1	1	1	1	0	1	1	0.96	10	7	9	9	0	5	3	1
Threonine--tRNA ligase, cytoplasmic OS=Saccharomyces cerevisiae (strain ATCC 204508 / S288c) OX=559292 GN=THS1 PE=1 SV=2	P04801	THS1	85 kDa		unknown	2420100	5818200	4062500	3595500	-1	3532800	490020	2471300	1	1	1	1	0	1	0.98	1	7	12	9	9	0	4	1	3
DNA replication licensing factor MCM6 OS=Saccharomyces cerevisiae (strain ATCC 204508 / S288c) OX=559292 GN=MCM6 PE=1 SV=2	P53091	MCM6	113 kDa		unknown	1977700	1707900	960710	730210	572560	2454900	2034000	3291300	1	1	1	1	1	1	1	1	9	9	4	6	2	5	4	4
Dolichol-phosphate mannosyltransferase OS=Saccharomyces cerevisiae (strain ATCC 204508 / S288c) OX=559292 GN=DPM1 PE=1 SV=3	P14020	DPM1	30 kDa		unknown	17170000	18064000	21620000	12933000	2935600	11916000	6017000	5418400	1	1	1	1	0.99	1	1	0.99	9	9	9	7	2	3	3	2
RNA-binding protein NAB6 OS=Saccharomyces cerevisiae (strain ATCC 204508 / S288c) OX=559292 GN=NAB6 PE=1 SV=1	Q03735	NAB6	126 kDa		unknown	1846300	2710800	1739600	1444800	620070	3330400	1859300	1088000	1	1	1	1	0.88	1	1	1	8	10	8	5	1	5	2	1
Cluster of Histone H2B.2 OS=Saccharomyces cerevisiae (strain ATCC 204508 / S288c) OX=559292 GN=HTB2 PE=1 SV=2 (P02294)	P02294 [2]	HTB2	14 kDa	TRUE	unknown	86399000	51939000	70560000	54350000	0	0	11233000	0	1	1	1	1	0.97	0.97	1	0	13	8	10	7	1	1	2	0
Valine--tRNA ligase, mitochondrial OS=Saccharomyces cerevisiae (strain ATCC 204508 / S288c) OX=559292 GN=VAS1 PE=1 SV=2	P07806	VAS1	126 kDa		unknown	1956800	2731900	1449400	1763400	0	1635900	174180	0	1	1	1	1	0	1	1	0	11	11	7	8	0	5	1	0
Protein BCP1 OS=Saccharomyces cerevisiae (strain ATCC 204508 / S288c) OX=559292 GN=BCP1 PE=1 SV=1	Q06338	BCP1	33 kDa		unknown	11581000	9646200	14489000	12968000	0	6471900	5293400	0	1	1	1	1	0	1	1	0	10	8	12	9	0	2	2	0
Translation initiation factor RLI1 OS=Saccharomyces cerevisiae (strain ATCC 204508 / S288c) OX=559292 GN=RLI1 PE=1 SV=1	Q03195	RLI1	68 kDa		unknown	8634600	8317800	8447900	12579000	0	489160	0	0	1	1	1	1	0	0.31	0	0	10	9	9	13	0	1	0	0
Nucleolar protein 12 OS=Saccharomyces cerevisiae (strain ATCC 204508 / S288c) OX=559292 GN=NOP12 PE=1 SV=1	Q08208	NOP12	52 kDa		unknown	6880400	4987200	14150000	6570600	0	0	-1	0	1	1	1	1	0	0	0	0	11	9	15	9	0	0	0	0
FK506-binding nuclear protein OS=Saccharomyces cerevisiae (strain ATCC 204508 / S288c) OX=559292 GN=FPR3 PE=1 SV=2	P38911	FPR3	47 kDa	TRUE	unknown	113860000	91535000	134130000	106790000	0	23292000	11208000	15249000	1	1	1	1	0	1	1	1	9	8	9	10	0	3	2	2
Polyamine N-acetyltransferase 1 OS=Saccharomyces cerevisiae (strain ATCC 204508 / S288c) OX=559292 GN=PAA1 PE=1 SV=1	Q12447	PAA1	22 kDa		unknown	14597000	24973000	28349000	20765000	0	9658200	16952000	9239800	1	1	1	1	0	1	1	1	7	9	9	8	0	2	4	2
Cystathionine beta-synthase OS=Saccharomyces cerevisiae (strain ATCC 204508 / S288c) OX=559292 GN=CYS4 PE=1 SV=1	P32582	CYS4	56 kDa		unknown	2354200	4963200	3557000	4338300	0	6048000	256210	1265000	1	1	1	1	0	1	1	0.86	6	11	7	9	0	6	1	1
Importin subunit beta-2 OS=Saccharomyces cerevisiae (strain ATCC 204508 / S288c) OX=559292 GN=KAP104 PE=1 SV=1	P38217	KAP104	104 kDa		unknown	5542600	6115500	5598800	4912500	3651400	5268100	6335600	3744200	1	1	1	1	1	1	1	1	8	8	7	7	3	3	4	2
60S ribosomal protein L39 OS=Saccharomyces cerevisiae (strain ATCC 204508 / S288c) OX=559292 GN=RPL39 PE=1 SV=3	P04650	RPL39	6 kDa		unknown	1463100000	1531100000	1908700000	1725100000	705400000	477440000	791770000	791810000	1	1	1	1	1	1	1	1	5	5	7	7	4	3	4	3
Cluster of 3-hydroxy-3-methylglutaryl-coenzyme A reductase 1 OS=Saccharomyces cerevisiae (strain ATCC 204508 / S288c) OX=559292 GN=HMG1 PE=1 SV=1 (P12683)	P12683 [2]	HMG1	116 kDa	TRUE	unknown	2265100	2983700	6248700	6493800	0	795460	167950	0	1	1	1	1	0	1	1	0	6	7	11	13	0	2	2	0
Proteasome component ECM29 OS=Saccharomyces cerevisiae (strain ATCC 204508 / S288c) OX=559292 GN=ECM29 PE=1 SV=1	P38737	ECM29	210 kDa		unknown	1037000	742220	1034000	527320	0	103950	138570	0	1	1	1	1	0	0.97	0.71	0.1	11	8	12	8	0	1	1	0
Protein MSN5 OS=Saccharomyces cerevisiae (strain ATCC 204508 / S288c) OX=559292 GN=MSN5 PE=1 SV=1	P52918	MSN5	142 kDa		unknown	600470	1061100	1160900	786340	-1	606160	0	0	1	1	1	1	0	1	0	0	8	11	10	9	0	3	0	0
Ribosome production factor 1 OS=Saccharomyces cerevisiae (strain ATCC 204508 / S288c) OX=559292 GN=RPF1 PE=1 SV=1	P38805	RPF1	35 kDa		unknown	26279000	22656000	16819000	23085000	0	568330	0	-1	1	1	1	1	0	0.38	0	0	12	11	7	11	0	1	0	0
Protein dopey OS=Saccharomyces cerevisiae (strain ATCC 204508 / S288c) OX=559292 GN=DOP1 PE=1 SV=1	Q03921	DOP1	195 kDa		unknown	1169100	663380	836170	522130	0	0	0	0	1	1	1	1	0	0	0	0	15	11	10	6	0	0	0	0
Tricalbin-1 OS=Saccharomyces cerevisiae (strain ATCC 204508 / S288c) OX=559292 GN=TCB1 PE=1 SV=1	Q12466	TCB1	134 kDa	TRUE	unknown	2408400	3031200	1778300	2769900	0	0	0	-1	1	1	1	1	0	0	0	0	11	13	7	10	0	0	0	0
Vesicular-fusion protein SEC18 OS=Saccharomyces cerevisiae (strain ATCC 204508 / S288c) OX=559292 GN=SEC18 PE=1 SV=2	P18759	SEC18	84 kDa		unknown	1778000	5625300	2486400	1839500	959130	6193600	1286500	6158500	1	1	1	1	0.65	1	0.98	1	7	12	7	5	1	4	1	2
Plasma membrane-associated coenzyme Q6 reductase PGA3 OS=Saccharomyces cerevisiae (strain ATCC 204508 / S288c) OX=559292 GN=PGA3 PE=1 SV=1	Q12746	PGA3	35 kDa		unknown	3695000	10660000	18856000	13605000	0	14387000	16540000	18234000	1	1	1	1	0	1	1	1	4	7	10	9	0	4	3	3
V-type proton ATPase subunit d OS=Saccharomyces cerevisiae (strain ATCC 204508 / S288c) OX=559292 GN=VMA6 PE=1 SV=2	P32366	VMA6	40 kDa		unknown	8818500	5717700	16631000	32051000	3415600	11779000	6423900	0	1	1	1	1	0.97	1	0.97	0	8	6	11	10	1	4	1	0
U3 small nucleolar RNA-associated protein 15 OS=Saccharomyces cerevisiae (strain ATCC 204508 / S288c) OX=559292 GN=UTP15 PE=1 SV=1	Q04305	UTP15	58 kDa		unknown	9845800	3163200	8384700	2622100	1372100	1092700	1161300	-1	1	1	1	1	0.77	1	0.9	0	12	6	11	7	1	1	1	0
54S ribosomal protein L3, mitochondrial OS=Saccharomyces cerevisiae (strain ATCC 204508 / S288c) OX=559292 GN=MRPL3 PE=1 SV=2	P36516	MRPL3	44 kDa		unknown	3886500	4808000	4174300	5112100	487890	2364100	1302700	0	1	1	1	1	0.33	1	1	0.23	8	9	8	9	1	3	2	0
Eukaryotic peptide chain release factor subunit 1 OS=Saccharomyces cerevisiae (strain ATCC 204508 / S288c) OX=559292 GN=SUP45 PE=1 SV=2	P12385	SUP45	49 kDa		unknown	2924100	4752100	4492100	5933200	0	8809600	2027800	1238200	1	1	1	1	0	1	0.97	0.46	7	9	7	10	0	6	1	1
Ketol-acid reductoisomerase, mitochondrial OS=Saccharomyces cerevisiae (strain ATCC 204508 / S288c) OX=559292 GN=ILV5 PE=1 SV=1	P06168	ILV5	44 kDa		unknown	10148000	9365700	13103000	10810000	0	5989800	4789300	0	1	1	1	1	0	1	1	0	8	9	10	8	0	4	2	0
U3 small nucleolar RNA-associated protein 13 OS=Saccharomyces cerevisiae (strain ATCC 204508 / S288c) OX=559292 GN=UTP13 PE=1 SV=1	Q05946	UTP13	91 kDa		unknown	3026400	2472600	5577600	2665900	272700	219720	0	0	1	1	1	1	0.68	1	0	0.15	8	7	9	10	1	2	0	0
Nucleolar protein 9 OS=Saccharomyces cerevisiae (strain ATCC 204508 / S288c) OX=559292 GN=NOP9 PE=1 SV=1	P47077	NOP9	78 kDa		unknown	3928600	3081900	6114200	2478500	-1	0	-1	-1	1	1	1	1	0	0.07	0	0	10	11	13	7	0	0	0	0
ATP-dependent rRNA helicase RRP3 OS=Saccharomyces cerevisiae (strain ATCC 204508 / S288c) OX=559292 GN=RRP3 PE=1 SV=2	P38712	RRP3	56 kDa		unknown	5807600	3335900	9735400	6787800	0	-1	0	0	1	1	1	1	0	0	0	0	10	7	11	13	0	0	0	0
Eukaryotic translation initiation factor 6 OS=Saccharomyces cerevisiae (strain ATCC 204508 / S288c) OX=559292 GN=TIF6 PE=1 SV=1	Q12522	TIF6	26 kDa		unknown	219330000	83499000	152540000	201860000	42553000	61635000	115760000	56958000	1	1	1	1	1	1	1	0.97	9	8	7	7	2	3	3	1
Proteasome subunit alpha type-1 OS=Saccharomyces cerevisiae (strain ATCC 204508 / S288c) OX=559292 GN=SCL1 PE=1 SV=1	P21243	SCL1	28 kDa		unknown	3854500	6011000	5941900	6572200	1616400	3611700	6160700	4797000	1	1	1	1	0.97	1	1	1	6	8	6	9	1	2	5	2
RNA-binding protein MRN1 OS=Saccharomyces cerevisiae (strain ATCC 204508 / S288c) OX=559292 GN=MRN1 PE=1 SV=1	Q08925	MRN1	69 kDa		unknown	1942900	2315900	4793600	3867200	1183600	4923600	4855900	4253800	1	1	1	1	0.75	1	1	1	7	5	8	7	1	4	4	3
26S proteasome regulatory subunit 6A OS=Saccharomyces cerevisiae (strain ATCC 204508 / S288c) OX=559292 GN=RPT5 PE=1 SV=3	P33297	RPT5	48 kDa		unknown	4665500	3229700	5215300	5365800	0	7018900	8784000	4579100	1	1	1	1	0.15	1	1	1	7	6	8	9	0	4	4	1
DNA repair/transcription protein MET18/MMS19 OS=Saccharomyces cerevisiae (strain ATCC 204508 / S288c) OX=559292 GN=MET18 PE=1 SV=1	P40469	MET18	118 kDa		unknown	1237900	1450800	797440	1371600	0	409110	0	0	1	1	1	1	0	0.97	0	0	10	10	8	10	0	1	0	0
rRNA-processing protein EBP2 OS=Saccharomyces cerevisiae (strain ATCC 204508 / S288c) OX=559292 GN=EBP2 PE=1 SV=1	P36049	EBP2	50 kDa		unknown	19965000	12982000	13707000	13148000	0	0	-1	0	1	1	1	1	0	0	0	0	13	10	9	8	0	0	0	0
Cluster of Protein MRH1 OS=Saccharomyces cerevisiae (strain ATCC 204508 / S288c) OX=559292 GN=MRH1 PE=1 SV=1 (Q12117)	Q12117 [2]	MRH1	36 kDa	TRUE	unknown	42777000	40309000	35803000	84082000	0	0	12588000	48719000	1	1	1	1	0.97	0.97	1	1	8	5	9	9	1	2	2	2
26S proteasome subunit RPT4 OS=Saccharomyces cerevisiae (strain ATCC 204508 / S288c) OX=559292 GN=RPT4 PE=1 SV=4	P53549	RPT4	49 kDa	TRUE	unknown	7260400	6632300	6226700	5884400	5360800	9533800	7312200	2593900	1	1	1	1	0.93	1	1	0.97	6	9	6	8	3	4	2	1
Translation initiation factor eIF-2B subunit delta OS=Saccharomyces cerevisiae (strain ATCC 204508 / S288c) OX=559292 GN=GCD2 PE=1 SV=1	P12754	GCD2	71 kDa		unknown	13844000	10355000	13168000	6335900	2190800	2110500	0	0	1	1	1	1	0.97	1	0	0.2	10	7	9	6	1	2	0	0
Nucleoporin NUP192 OS=Saccharomyces cerevisiae (strain ATCC 204508 / S288c) OX=559292 GN=NUP192 PE=1 SV=1	P47054	NUP192	192 kDa		unknown	213390	489810	2356500	2213900	0	0	0	-1	1	1	1	1	0	0.34	0	0	2	6	16	13	0	0	0	0
Superkiller protein 3 OS=Saccharomyces cerevisiae (strain ATCC 204508 / S288c) OX=559292 GN=SKI3 PE=1 SV=2	P17883	SKI3	164 kDa		unknown	1890800	790350	992050	552300	0	0	0	0	1	1	1	1	0	0	0	0	15	8	10	6	0	0	0	0
U3 small nucleolar RNA-associated protein 12 OS=Saccharomyces cerevisiae (strain ATCC 204508 / S288c) OX=559292 GN=DIP2 PE=1 SV=1	Q12220	DIP2	106 kDa		unknown	3725600	1702600	3153500	927440	0	0	0	0	1	1	1	1	0	0	0	0	12	10	10	6	0	0	0	0
Nascent polypeptide-associated complex subunit alpha OS=Saccharomyces cerevisiae (strain ATCC 204508 / S288c) OX=559292 GN=EGD2 PE=1 SV=3	P38879	EGD2	19 kDa		unknown	94767000	118560000	175510000	147940000	-1	0	-1	0	1	1	1	1	0	0	0	0	7	11	10	11	0	0	0	0
5-methyltetrahydropteroyltriglutamate--homocysteine methyltransferase OS=Saccharomyces cerevisiae (strain ATCC 204508 / S288c) OX=559292 GN=MET6 PE=1 SV=4	P05694	MET6	86 kDa		unknown	1690300	1645300	1209800	2106700	477330	2609000	1701700	541030	1	1	1	1	0.89	1	1	0.49	7	7	7	9	1	3	3	1
tRNA (guanine(26)-N(2))-dimethyltransferase, mitochondrial OS=Saccharomyces cerevisiae (strain ATCC 204508 / S288c) OX=559292 GN=TRM1 PE=1 SV=1	P15565	TRM1	64 kDa		unknown	3358600	4031700	5540800	6255600	0	0	0	0	1	1	1	1	0	0.1	0	0	8	9	8	12	0	0	0	0
40S ribosomal protein S26-B OS=Saccharomyces cerevisiae (strain ATCC 204508 / S288c) OX=559292 GN=RPS26B PE=1 SV=1	P39939 (+1)	RPS26B	13 kDa		unknown	823730000	872000000	932150000	858810000	654970000	609440000	694800000	306400000	1	1	1	1	1	1	1	1	5	6	5	8	3	4	2	2
26S proteasome regulatory subunit 4 homolog OS=Saccharomyces cerevisiae (strain ATCC 204508 / S288c) OX=559292 GN=RPT2 PE=1 SV=3	P40327	RPT2	49 kDa		unknown	8826800	4448000	5288000	4241200	853540	5474800	6825600	8165900	1	1	1	1	0.98	1	1	1	8	7	6	6	1	2	2	2
40S ribosomal protein S29-B OS=Saccharomyces cerevisiae (strain ATCC 204508 / S288c) OX=559292 GN=RPS29B PE=1 SV=3	P41058	RPS29B	7 kDa	TRUE	unknown	250440000	315870000	234140000	246530000	125860000	311530000	332200000	176540000	0.99	0.99	0.99	0.99	1	1	1	1	5	5	4	4	4	5	5	4
Hydroxymethylglutaryl-CoA synthase OS=Saccharomyces cerevisiae (strain ATCC 204508 / S288c) OX=559292 GN=ERG13 PE=1 SV=1	P54839	ERG13	55 kDa		unknown	8075300	2738500	4602500	4906000	741490	5658900	6678900	2319600	1	1	1	1	0.43	1	1	0.98	9	5	6	7	1	3	3	1
Protein arginine N-methyltransferase 2 OS=Saccharomyces cerevisiae (strain ATCC 204508 / S288c) OX=559292 GN=RMT2 PE=1 SV=1	Q03305	RMT2	47 kDa		unknown	12356000	10826000	8553300	7460400	2110600	10807000	8673900	8111800	1	1	1	1	0.37	1	1	0.97	7	8	8	5	1	3	3	1
60S ribosomal protein L22-B OS=Saccharomyces cerevisiae (strain ATCC 204508 / S288c) OX=559292 GN=RPL22B PE=1 SV=2	P56628	RPL22B	14 kDa	TRUE	unknown	296720000	460820000	463910000	346300000	149040000	270150000	336420000	238320000	1	1	1	1	0.06	1	1	0.07	5	6	6	7	1	4	4	2
1,3-beta-glucanosyltransferase GAS1 OS=Saccharomyces cerevisiae (strain ATCC 204508 / S288c) OX=559292 GN=GAS1 PE=1 SV=2	P22146	GAS1	60 kDa		unknown	6472900	3480900	12132000	17657000	0	571860	-1	-1	1	1	1	1	0	0.97	0	0	9	7	9	10	0	1	0	0
5'-3' exoribonuclease 1 OS=Saccharomyces cerevisiae (strain ATCC 204508 / S288c) OX=559292 GN=XRN1 PE=1 SV=1	P22147	XRN1	175 kDa		unknown	902460	598050	1470400	1037600	0	0	0	0	1	1	1	1	0	0	0	0	8	7	11	9	0	0	0	0
Elongator complex protein 1 OS=Saccharomyces cerevisiae (strain ATCC 204508 / S288c) OX=559292 GN=IKI3 PE=1 SV=1	Q06706	IKI3	153 kDa		unknown	1896500	1528600	1579500	1914000	-1	0	0	0	1	1	1	1	0	0	0	0	10	9	8	9	0	0	0	0
Nucleolar protein 13 OS=Saccharomyces cerevisiae (strain ATCC 204508 / S288c) OX=559292 GN=NOP13 PE=1 SV=2	P53883	NOP13	46 kDa		unknown	5466900	1466300	3652600	5406000	0	-1	-1	0	1	1	1	1	0	0	0	0	11	6	8	11	0	0	0	0
Isoleucine--tRNA ligase, cytoplasmic OS=Saccharomyces cerevisiae (strain ATCC 204508 / S288c) OX=559292 GN=ILS1 PE=1 SV=1	P09436	ILS1	123 kDa		unknown	867400	1446500	1188800	1304100	0	213190	0	0	1	1	1	1	0	1	0	0	6	10	7	10	0	2	0	0
ATP-dependent RNA helicase HCA4 OS=Saccharomyces cerevisiae (strain ATCC 204508 / S288c) OX=559292 GN=HCA4 PE=1 SV=2	P20448	HCA4	87 kDa		unknown	6070600	4782900	6595600	6477800	0	0	0	0	1	1	1	1	0	0.11	0	0	9	8	10	9	0	0	0	0
26S proteasome regulatory subunit 7 homolog OS=Saccharomyces cerevisiae (strain ATCC 204508 / S288c) OX=559292 GN=RPT1 PE=1 SV=1	P33299	RPT1	52 kDa		unknown	3040100	2428400	3560400	4062400	3030000	6913300	3118700	9236900	1	1	1	1	0.87	1	1	1	6	4	6	6	2	4	2	4
Sec sixty-one protein homolog OS=Saccharomyces cerevisiae (strain ATCC 204508 / S288c) OX=559292 GN=SSH1 PE=1 SV=1	P38353	SSH1	53 kDa		unknown	15748000	8028700	15873000	10473000	0	10041000	12717000	5541100	1	1	1	1	0	1	1	0.99	6	6	7	6	0	6	3	1
Cluster of Protein BMH1 OS=Saccharomyces cerevisiae (strain ATCC 204508 / S288c) OX=559292 GN=BMH1 PE=1 SV=4 (P29311)	P29311 [2]	BMH1	30 kDa	TRUE	unknown	12250000	9070700	14126000	9775900	-1	6918000	0	0	1	1	1	1	0	1	1	1	8	5	6	7	0	3	2	2
ATP-dependent clpX-like chaperone, mitochondrial OS=Saccharomyces cerevisiae (strain ATCC 204508 / S288c) OX=559292 GN=MCX1 PE=1 SV=1	P38323	MCX1	58 kDa		unknown	4228300	3982600	3922700	2935000	-1	1397000	985960	0	1	1	1	1	0	1	1	0	9	9	7	5	0	2	2	0
ATP-dependent RNA helicase DBP9 OS=Saccharomyces cerevisiae (strain ATCC 204508 / S288c) OX=559292 GN=DBP9 PE=1 SV=1	Q06218	DBP9	68 kDa		unknown	3294300	6577100	5657600	5467200	0	0	-1	0	1	1	1	1	0	0	0	0	7	11	8	9	0	0	0	0
Translation initiation factor eIF-2B subunit alpha OS=Saccharomyces cerevisiae (strain ATCC 204508 / S288c) OX=559292 GN=GCN3 PE=1 SV=1	P14741	GCN3	34 kDa		unknown	13008000	9384100	12717000	5794200	1115500	7597700	4851300	2413200	1	1	1	1	0.95	1	1	0.96	8	8	7	4	1	2	2	1
Minichromosome maintenance protein 5 OS=Saccharomyces cerevisiae (strain ATCC 204508 / S288c) OX=559292 GN=MCM5 PE=1 SV=1	P29496	MCM5	86 kDa		unknown	2351400	1014700	1946200	1697300	742370	1062200	1940900	-1	1	1	1	1	1	1	1	0	7	5	7	5	2	2	3	0
Aspartate-semialdehyde dehydrogenase OS=Saccharomyces cerevisiae (strain ATCC 204508 / S288c) OX=559292 GN=HOM2 PE=1 SV=1	P13663	HOM2	40 kDa		unknown	2519700	5760300	5743000	6092100	-1	3994300	1681100	4884700	1	1	1	1	0	1	1	1	4	7	7	7	0	3	2	3
25S rRNA (adenine(645)-N(1))-methyltransferase OS=Saccharomyces cerevisiae (strain ATCC 204508 / S288c) OX=559292 GN=RRP8 PE=1 SV=2	P38961	RRP8	46 kDa		unknown	7601800	7916900	7574700	5896000	0	3204300	2013600	0	1	1	1	1	0	0.99	0.97	0.46	7	10	6	4	0	2	1	1
Aspartate--tRNA ligase, cytoplasmic OS=Saccharomyces cerevisiae (strain ATCC 204508 / S288c) OX=559292 GN=DPS1 PE=1 SV=3	P04802	DPS1	64 kDa		unknown	3225300	6071400	2586700	3888200	0	1135600	-1	684740	1	1	1	1	0	0.98	0	0.95	6	12	5	8	0	1	0	1
U3 small nucleolar RNA-associated protein 4 OS=Saccharomyces cerevisiae (strain ATCC 204508 / S288c) OX=559292 GN=UTP4 PE=1 SV=1	Q06679	UTP4	88 kDa		unknown	5699000	1906900	3114700	1943700	0	286410	0	0	1	1	1	1	0.23	0.86	0	0	12	7	6	6	1	1	0	0
Nuclear localization sequence-binding protein OS=Saccharomyces cerevisiae (strain ATCC 204508 / S288c) OX=559292 GN=NSR1 PE=1 SV=1	P27476	NSR1	45 kDa		unknown	15578000	10072000	36075000	15699000	-1	1445100	-1	-1	1	1	1	1	0	0.97	0	0	9	7	10	7	0	1	0	0
Ribosome biogenesis protein NSA1 OS=Saccharomyces cerevisiae (strain ATCC 204508 / S288c) OX=559292 GN=NSA1 PE=1 SV=1	P53136	NSA1	52 kDa		unknown	5921100	7341400	2321000	6473400	-1	0	0	0	1	1	1	1	0	0	0.89	0	8	11	5	8	0	0	1	0
Pyruvate dehydrogenase complex protein X component, mitochondrial OS=Saccharomyces cerevisiae (strain ATCC 204508 / S288c) OX=559292 GN=PDX1 PE=1 SV=1	P16451	PDX1	45 kDa		unknown	10136000	2282900	5199200	9979500	0	-1	0	0	1	1	1	1	0	0	0.44	0.1	11	3	8	9	0	0	0	0
Ribosome biogenesis protein RLP7 OS=Saccharomyces cerevisiae (strain ATCC 204508 / S288c) OX=559292 GN=RLP7 PE=1 SV=1	P40693	RLP7	37 kDa		unknown	60391000	71424000	71723000	67453000	1199800	0	0	0	1	1	1	1	0.49	0	0	0	8	10	8	7	1	0	0	0
26S proteasome regulatory subunit RPN2 OS=Saccharomyces cerevisiae (strain ATCC 204508 / S288c) OX=559292 GN=RPN2 PE=1 SV=4	P32565	RPN2	104 kDa	TRUE	unknown	2156900	1110600	1772300	2316100	0	0	517310	0	1	1	1	1	0	0	0.13	0	8	8	7	9	0	0	1	0
Nucleolar pre-ribosomal-associated protein 2 OS=Saccharomyces cerevisiae (strain ATCC 204508 / S288c) OX=559292 GN=URB2 PE=1 SV=1	P47108	URB2	135 kDa		unknown	1658300	1316400	1520000	1096800	0	0	0	0	1	1	1	1	0	0	0	0	9	9	9	7	0	0	0	0
Nuclear migration protein NUM1 OS=Saccharomyces cerevisiae (strain ATCC 204508 / S288c) OX=559292 GN=NUM1 PE=1 SV=2	Q00402	NUM1	313 kDa		unknown	1691700	1581000	1963100	1863700	0	0	0	0	1	1	1	1	0	0	0	0	10	9	11	10	0	0	0	0
Nucleolar complex-associated protein 3 OS=Saccharomyces cerevisiae (strain ATCC 204508 / S288c) OX=559292 GN=NOC3 PE=1 SV=1	Q07896	NOC3	76 kDa		unknown	3558500	5010400	4568400	5340500	0	-1	0	0	1	1	1	1	0	0	0	0	7	10	8	9	0	0	0	0
RNA annealing protein YRA1 OS=Saccharomyces cerevisiae (strain ATCC 204508 / S288c) OX=559292 GN=YRA1 PE=1 SV=2	Q12159	YRA1	25 kDa		unknown	77153000	42968000	46041000	70219000	0	0	-1	0	1	1	1	1	0	0	0	0	11	6	7	10	0	0	0	0
37S ribosomal protein S23, mitochondrial OS=Saccharomyces cerevisiae (strain ATCC 204508 / S288c) OX=559292 GN=RSM23 PE=1 SV=3	Q01163	RSM23	51 kDa		unknown	2712300	5557800	2729700	3024200	1361900	8585900	4060400	594080	1	1	1	1	1	1	1	0.99	4	7	4	3	2	7	4	1
Multifunctional tryptophan biosynthesis protein OS=Saccharomyces cerevisiae (strain ATCC 204508 / S288c) OX=559292 GN=TRP3 PE=1 SV=2	P00937	TRP3	53 kDa		unknown	3516700	4709100	2989200	3759600	853520	11225000	5445300	8054100	1	1	1	1	0.97	1	1	1	6	6	4	4	1	4	4	3
5-aminolevulinate synthase, mitochondrial OS=Saccharomyces cerevisiae (strain ATCC 204508 / S288c) OX=559292 GN=HEM1 PE=1 SV=1	P09950	HEM1	59 kDa		unknown	3809400	4839100	4592600	1811000	0	5492700	6330200	2510300	1	1	1	1	0.23	1	1	1	5	6	6	4	1	4	5	1
ATP synthase subunit gamma, mitochondrial OS=Saccharomyces cerevisiae (strain ATCC 204508 / S288c) OX=559292 GN=ATP3 PE=1 SV=1	P38077	ATP3	34 kDa		unknown	11914000	11529000	12317000	9184800	838240	3965700	3413100	0	1	1	1	1	0.93	1	1	0.06	7	8	6	5	1	2	2	0
Essential for maintenance of the cell wall protein 1 OS=Saccharomyces cerevisiae (strain ATCC 204508 / S288c) OX=559292 GN=EMW1 PE=1 SV=1	P42842	EMW1	102 kDa		unknown	1475000	1431100	864360	1249400	0	1461000	121600	0	1	1	1	1	0	1	0.99	0.14	8	8	5	6	0	3	1	0
Endoplasmic reticulum transmembrane helix translocase OS=Saccharomyces cerevisiae (strain ATCC 204508 / S288c) OX=559292 GN=SPF1 PE=1 SV=1	P39986	SPF1	135 kDa		unknown	2189800	944840	4095400	2412400	0	982850	0	0	1	1	1	1	0	1	0.75	0	6	5	12	7	0	2	1	0
Ribosome-associated complex subunit SSZ1 OS=Saccharomyces cerevisiae (strain ATCC 204508 / S288c) OX=559292 GN=SSZ1 PE=1 SV=2	P38788	SSZ1	58 kDa		unknown	5245600	2197900	4352900	3795600	-1	450010	0	-1	1	1	1	1	0	0.95	0	0	9	6	7	10	0	1	0	0
tRNA (guanine(37)-N1)-methyltransferase OS=Saccharomyces cerevisiae (strain ATCC 204508 / S288c) OX=559292 GN=TRM5 PE=1 SV=1	P38793	TRM5	57 kDa		unknown	3783300	2914000	4056600	2622400	0	0	0	-1	1	1	1	1	0	0	0	0	10	8	7	8	0	0	0	0
Threonine dehydratase, mitochondrial OS=Saccharomyces cerevisiae (strain ATCC 204508 / S288c) OX=559292 GN=ILV1 PE=1 SV=2	P00927	ILV1	64 kDa		unknown	1150000	1831500	881950	3448800	-1	4974900	970430	6759600	1	1	1	1	0	1	0.98	1	3	4	2	8	0	6	1	4
54S ribosomal protein YmL6, mitochondrial OS=Saccharomyces cerevisiae (strain ATCC 204508 / S288c) OX=559292 GN=YML6 PE=1 SV=1	P51998	YML6	32 kDa		unknown	6095600	9714300	6681900	7295400	685330	1828700	0	0	1	1	1	1	0.43	0.99	0.08	0	6	8	5	8	1	2	0	0
Ribosome biogenesis protein NSA2 OS=Saccharomyces cerevisiae (strain ATCC 204508 / S288c) OX=559292 GN=NSA2 PE=1 SV=1	P40078	NSA2	30 kDa		unknown	25445000	20041000	21555000	22912000	0	13561000	0	0	1	1	1	1	0.14	0.97	0	0	9	6	7	8	0	1	0	0
Acyl-CoA desaturase 1 OS=Saccharomyces cerevisiae (strain ATCC 204508 / S288c) OX=559292 GN=OLE1 PE=1 SV=2	P21147	OLE1	58 kDa		unknown	4791300	4702400	10920000	26574000	0	0	-1	0	1	1	1	1	0.06	0	0	0	4	5	11	12	0	0	0	0
H/ACA ribonucleoprotein complex subunit GAR1 OS=Saccharomyces cerevisiae (strain ATCC 204508 / S288c) OX=559292 GN=GAR1 PE=1 SV=1	P28007	GAR1	21 kDa		unknown	59551000	60216000	39912000	55025000	0	-1	0	0	1	1	1	1	0	0	0	0	8	9	7	8	0	0	0	0
25S rRNA (cytosine(2278)-C(5))-methyltransferase OS=Saccharomyces cerevisiae (strain ATCC 204508 / S288c) OX=559292 GN=RCM1 PE=1 SV=1	P53972	RCM1	56 kDa		unknown	2230900	2137200	1296300	1274700	792760	5333000	1473200	1778300	1	1	1	1	0.96	1	1	1	6	6	6	4	1	3	2	1
40S ribosomal protein S29-A OS=Saccharomyces cerevisiae (strain ATCC 204508 / S288c) OX=559292 GN=RPS29A PE=1 SV=3	P41057	RPS29A	7 kDa	TRUE	unknown	257680000	297860000	223230000	242360000	87475000	289200000	306860000	117750000	1	1	1	1	0.99	0.88	0.92	0.08	5	5	4	5	3	3	3	2
Cluster of Heat shock protein homolog SSE1 OS=Saccharomyces cerevisiae (strain ATCC 204508 / S288c) OX=559292 GN=SSE1 PE=1 SV=4 (P32589)	P32589 [2]	SSE1	77 kDa	TRUE	unknown	3699900	1596000	3435200	1836800	0	0	0	-1	1	1	1	1	0	0	0.97	0	8	6	10	5	0	0	1	0
tRNA (guanosine(18)-2'-O)-methyltransferase OS=Saccharomyces cerevisiae (strain ATCC 204508 / S288c) OX=559292 GN=TRM3 PE=1 SV=1	Q07527	TRM3	165 kDa		unknown	669090	661940	1156000	408320	0	0	0	0	1	1	1	1	0	0	0	0	6	8	10	6	0	0	0	0
Phosphatidylethanolamine N-methyltransferase OS=Saccharomyces cerevisiae (strain ATCC 204508 / S288c) OX=559292 GN=CHO2 PE=1 SV=1	P05374	CHO2	101 kDa		unknown	1856600	2728700	3726400	2957900	0	0	0	0	1	1	1	1	0	0	0	0	6	8	8	7	0	0	0	0
Pre-rRNA-processing protein RIX1 OS=Saccharomyces cerevisiae (strain ATCC 204508 / S288c) OX=559292 GN=RIX1 PE=1 SV=2	P38883	RIX1	87 kDa		unknown	1335300	2386200	2514000	2924600	-1	0	-1	0	1	1	1	1	0	0	0	0	6	6	10	7	0	0	0	0
Ribosome assembly protein RRB1 OS=Saccharomyces cerevisiae (strain ATCC 204508 / S288c) OX=559292 GN=RRB1 PE=1 SV=1	Q04225	RRB1	57 kDa		unknown	14373000	9651900	11809000	8546700	0	-1	-1	-1	1	1	1	1	0	0	0	0	8	9	8	5	0	0	0	0
Phosphatidyl-N-methylethanolamine N-methyltransferase OS=Saccharomyces cerevisiae (strain ATCC 204508 / S288c) OX=559292 GN=OPI3 PE=1 SV=1	P05375	OPI3	23 kDa		unknown	5394700	15778000	12320000	12373000	1930900	9734400	10418000	13685000	1	1	1	1	0.97	0.97	0.97	0.97	6	7	6	6	1	1	1	1
Cluster of Ribose-phosphate pyrophosphokinase 3 OS=Saccharomyces cerevisiae (strain ATCC 204508 / S288c) OX=559292 GN=PRS3 PE=1 SV=1 (P38689)	P38689 [2]	PRS3	35 kDa	TRUE	unknown	1359900	3832900	1531400	3104600	-1	11773000	2693800	9983300	1	1	1	1	0	1	1	1	3	5	3	4	0	8	2	4
Citrate/oxoglutarate carrier protein OS=Saccharomyces cerevisiae (strain ATCC 204508 / S288c) OX=559292 GN=YHM2 PE=1 SV=1	Q04013	YHM2	34 kDa		unknown	32087000	27201000	37656000	31371000	2056000	4529200	4311000	0	1	1	1	1	0.99	1	1	0	6	6	6	7	1	1	1	0
Homocysteine/cysteine synthase OS=Saccharomyces cerevisiae (strain ATCC 204508 / S288c) OX=559292 GN=MET17 PE=1 SV=3	P06106	MET17	49 kDa		unknown	2477300	7940000	4646400	6532000	0	4799600	1043300	2902300	1	1	1	1	0	1	0.97	0.98	5	8	7	6	0	2	1	1
U3 small nucleolar RNA-associated protein 21 OS=Saccharomyces cerevisiae (strain ATCC 204508 / S288c) OX=559292 GN=UTP21 PE=1 SV=1	Q06078	UTP21	105 kDa		unknown	3353700	1519600	4196900	1562700	1090200	0	301670	0	1	1	1	1	1	0.12	0.98	0	7	5	9	3	2	0	1	0
Antiviral helicase SKI2 OS=Saccharomyces cerevisiae (strain ATCC 204508 / S288c) OX=559292 GN=SKI2 PE=1 SV=2	P35207	SKI2	146 kDa		unknown	1244400	355920	1607700	364230	0	0	0	0	1	1	1	1	0	0	0	0.46	11	4	11	3	0	0	0	1
Tricalbin-2 OS=Saccharomyces cerevisiae (strain ATCC 204508 / S288c) OX=559292 GN=TCB2 PE=1 SV=1	P48231	TCB2	133 kDa	TRUE	unknown	1262500	1280300	1591400	683890	0	0	0	-1	1	1	1	1	0.18	0	0	0	7	6	9	6	0	0	0	0
Mitochondrial GTP/GDP carrier protein 1 OS=Saccharomyces cerevisiae (strain ATCC 204508 / S288c) OX=559292 GN=GGC1 PE=1 SV=1	P38988	GGC1	33 kDa		unknown	7482400	9848900	14551000	9438900	-1	-1	0	-1	1	1	1	1	0	0	0	0	7	8	8	7	0	0	0	0
Protein KRI1 OS=Saccharomyces cerevisiae (strain ATCC 204508 / S288c) OX=559292 GN=KRI1 PE=1 SV=1	P42846	KRI1	69 kDa		unknown	3969300	2466600	7983600	3719600	-1	-1	-1	-1	1	1	1	1	0	0	0	0	7	5	11	7	0	0	0	0
60S ribosomal protein L34-B OS=Saccharomyces cerevisiae (strain ATCC 204508 / S288c) OX=559292 GN=RPL34B PE=1 SV=1	P40525 (+1)	RPL34B	14 kDa		unknown	1158600000	1120600000	1186000000	1155400000	521870000	364910000	337940000	441330000	1	1	1	1	1	1	1	1	7	5	5	3	3	2	2	2
40S ribosomal protein S27-A OS=Saccharomyces cerevisiae (strain ATCC 204508 / S288c) OX=559292 GN=RPS27A PE=1 SV=1	P35997 (+1)	RPS27A	9 kDa		unknown	2727100000	3291600000	3188800000	3163800000	1703200000	963480000	1687500000	960100000	1	1	1	1	1	0.97	1	1	5	5	3	4	3	2	3	3
Ribose-phosphate pyrophosphokinase 1 OS=Saccharomyces cerevisiae (strain ATCC 204508 / S288c) OX=559292 GN=PRS1 PE=1 SV=1	P32895	PRS1	47 kDa		unknown	1329000	7904400	2262600	3069700	0	12158000	2935600	15067000	1	1	1	1	0	1	1	1	3	9	3	4	0	4	2	3
Enhancer of translation termination 1 OS=Saccharomyces cerevisiae (strain ATCC 204508 / S288c) OX=559292 GN=ETT1 PE=1 SV=1	Q08421	ETT1	47 kDa		unknown	5184300	10460000	9561900	11156000	1505800	19614000	-1	0	1	1	1	1	0.57	1	0	0.21	4	7	5	7	1	4	0	0
60S ribosome subunit biogenesis protein NOP8 OS=Saccharomyces cerevisiae (strain ATCC 204508 / S288c) OX=559292 GN=NOP8 PE=1 SV=1	Q08287	NOP8	57 kDa		unknown	3497500	3112000	3400300	2569700	-1	0	0	0	1	1	1	1	0	0.51	0.96	0	6	9	8	5	0	0	1	0
Synchronized import protein 1 OS=Saccharomyces cerevisiae (strain ATCC 204508 / S288c) OX=559292 GN=SYO1 PE=1 SV=1	Q07395	SYO1	70 kDa		unknown	4799100	4105600	7255400	5947100	-1	914740	-1	-1	1	1	1	1	0	0.73	0	0	7	5	8	8	0	1	0	0
Oxysterol-binding protein homolog 3 OS=Saccharomyces cerevisiae (strain ATCC 204508 / S288c) OX=559292 GN=OSH3 PE=1 SV=1	P38713	OSH3	114 kDa		unknown	900570	619860	570050	383440	0	0	0	-1	1	1	1	1	0	0.23	0	0	7	6	8	6	0	1	0	0
60S acidic ribosomal protein P2-alpha OS=Saccharomyces cerevisiae (strain ATCC 204508 / S288c) OX=559292 GN=RPP2A PE=1 SV=1	P05319	RPP2A	11 kDa		unknown	108660000	149420000	135580000	95398000	62104000	69686000	49407000	95862000	1	1	1	1	1	1	0.97	1	5	8	4	2	2	2	1	2
Partitioning protein REP1 OS=Saccharomyces cerevisiae (strain ATCC 204508 / S288c) OX=559292 GN=REP1 PE=1 SV=1	P03871	REP1	43 kDa		unknown	5311900	4309500	3579700	2627600	1844800	5516600	3791900	3734300	1	1	1	1	0.97	1	1	0.97	5	7	6	4	1	2	1	1
Protein MAK16 OS=Saccharomyces cerevisiae (strain ATCC 204508 / S288c) OX=559292 GN=MAK16 PE=1 SV=2	P10962	MAK16	36 kDa		unknown	13429000	10455000	10917000	11269000	2318500	2523200	3696000	3543400	1	1	1	1	0.97	1	0.97	1	6	5	4	6	1	2	1	2
Lysine--tRNA ligase, cytoplasmic OS=Saccharomyces cerevisiae (strain ATCC 204508 / S288c) OX=559292 GN=KRS1 PE=1 SV=2	P15180	KRS1	68 kDa		unknown	1520800	2811600	2037300	5113900	0	3930400	2618100	5496300	1	1	1	1	0	1	1	1	3	5	2	7	0	4	3	3
Pre-rRNA-processing protein IPI3 OS=Saccharomyces cerevisiae (strain ATCC 204508 / S288c) OX=559292 GN=IPI3 PE=1 SV=1	P53877	IPI3	62 kDa		unknown	2448200	2993000	1886100	3596200	0	712460	1854900	1246600	1	1	1	1	0	0.97	1	0.97	4	6	5	8	0	1	2	1
T-complex protein 1 subunit beta OS=Saccharomyces cerevisiae (strain ATCC 204508 / S288c) OX=559292 GN=CCT2 PE=1 SV=1	P39076	CCT2	57 kDa		unknown	1693600	4045500	2255000	4553000	681800	785170	1429000	0	1	1	1	1	0.97	0.97	1	0	4	7	4	8	1	1	2	0
Cargo-transport protein YPP1 OS=Saccharomyces cerevisiae (strain ATCC 204508 / S288c) OX=559292 GN=YPP1 PE=1 SV=1	P46951	YPP1	95 kDa		unknown	2941900	897440	663260	2423000	0	924420	-1	790830	1	1	1	1	0.97	1	0	0.94	5	8	3	6	1	2	0	1
Dolichyl-diphosphooligosaccharide--protein glycosyltransferase subunit WBP1 OS=Saccharomyces cerevisiae (strain ATCC 204508 / S288c) OX=559292 GN=WBP1 PE=1 SV=1	P33767	WBP1	49 kDa		unknown	3134700	3748300	12468000	18831000	663780	5138600	655740	-1	1	1	1	1	0.94	1	0.73	0	3	4	7	10	1	2	1	0
Peptide transporter PTR2 OS=Saccharomyces cerevisiae (strain ATCC 204508 / S288c) OX=559292 GN=PTR2 PE=1 SV=2	P32901	PTR2	68 kDa		unknown	3615800	2200000	6102900	5982600	0	3120600	804090	2268700	1	1	1	1	0	1	0.31	1	5	4	6	8	0	2	1	2
Adenine deaminase OS=Saccharomyces cerevisiae (strain ATCC 204508 / S288c) OX=559292 GN=AAH1 PE=1 SV=1	P53909	AAH1	40 kDa		unknown	3496500	5721900	8488600	3103500	-1	7298700	0	3068700	1	1	1	1	0	1	0.12	0.99	5	6	8	3	0	4	0	1
60S ribosome subunit biogenesis protein NIP7 OS=Saccharomyces cerevisiae (strain ATCC 204508 / S288c) OX=559292 GN=NIP7 PE=1 SV=1	Q08962	NIP7	20 kDa		unknown	13856000	16015000	16256000	15697000	-1	1667500	0	-1	1	1	1	1	0	1	0.08	0	7	7	7	5	0	1	0	0
Lanosterol 14-alpha demethylase OS=Saccharomyces cerevisiae (strain ATCC 204508 / S288c) OX=559292 GN=ERG11 PE=1 SV=1	P10614	ERG11	61 kDa		unknown	9018400	9183600	9160100	7936900	0	4050100	-1	0	1	1	1	1	0	0.99	0	0	7	7	7	6	0	1	0	0
Cluster of Sphingolipid long chain base-responsive protein PIL1 OS=Saccharomyces cerevisiae (strain ATCC 204508 / S288c) OX=559292 GN=PIL1 PE=1 SV=1 (P53252)	P53252 [2]	PIL1	38 kDa	TRUE	unknown	6048400	12712000	7689100	8525500	-1	-1	0	0	1	1	1	1	0	0.1	0	0.24	6	9	5	6	0	0	0	1
54S ribosomal protein L35, mitochondrial OS=Saccharomyces cerevisiae (strain ATCC 204508 / S288c) OX=559292 GN=MRPL35 PE=1 SV=1	Q06678	MRPL35	43 kDa		unknown	4407600	5943300	4458600	4377600	0	0	0	-1	1	1	1	1	0	0.05	0.06	0	6	10	5	7	0	0	0	0
ATP-dependent RNA helicase DRS1 OS=Saccharomyces cerevisiae (strain ATCC 204508 / S288c) OX=559292 GN=DRS1 PE=1 SV=2	P32892	DRS1	85 kDa		unknown	1358800	2116500	3847900	2278300	0	0	0	-1	1	1	1	1	0	0	0	0	6	6	10	6	0	0	0	0
54S ribosomal protein L2, mitochondrial OS=Saccharomyces cerevisiae (strain ATCC 204508 / S288c) OX=559292 GN=MRP7 PE=1 SV=1	P12687	MRP7	43 kDa		unknown	5951300	4288400	7360600	5778800	-1	0	0	-1	1	1	1	1	0	0	0	0	8	7	7	6	0	0	0	0
Nascent polypeptide-associated complex subunit beta-1 OS=Saccharomyces cerevisiae (strain ATCC 204508 / S288c) OX=559292 GN=EGD1 PE=1 SV=2	Q02642	EGD1	17 kDa		unknown	67795000	53341000	93353000	59704000	-1	-1	-1	-1	1	1	1	1	0	0	0	0	7	8	7	6	0	0	0	0
Probable proteasome subunit alpha type-7 OS=Saccharomyces cerevisiae (strain ATCC 204508 / S288c) OX=559292 GN=PRE10 PE=1 SV=2	P21242	PRE10	32 kDa		unknown	8573000	8787400	9424200	8684100	1617300	10730000	14062000	3207200	1	1	1	1	1	1	1	0.97	4	4	4	4	2	3	4	1
Elongator complex protein 3 OS=Saccharomyces cerevisiae (strain ATCC 204508 / S288c) OX=559292 GN=ELP3 PE=1 SV=1	Q02908	ELP3	64 kDa		unknown	2637200	1924700	3211400	2816500	493760	4398000	733850	1377700	1	1	1	1	0.89	1	0.64	0.98	5	5	6	5	1	3	1	1
Aspartate aminotransferase, mitochondrial OS=Saccharomyces cerevisiae (strain ATCC 204508 / S288c) OX=559292 GN=AAT1 PE=1 SV=2	Q01802	AAT1	52 kDa		unknown	1826200	2915300	3706200	3027800	452510	0	1657000	0	1	1	1	1	0.25	1	0.97	0.97	4	6	7	5	1	2	1	1
High-affinity glutamine permease OS=Saccharomyces cerevisiae (strain ATCC 204508 / S288c) OX=559292 GN=GNP1 PE=1 SV=2	P48813	GNP1	74 kDa		unknown	2582400	4438100	3667600	3012000	0	0	1111500	0	1	1	1	1	0	1	1	0.9	4	8	4	5	0	2	1	0
DNA replication licensing factor MCM7 OS=Saccharomyces cerevisiae (strain ATCC 204508 / S288c) OX=559292 GN=MCM7 PE=1 SV=4	P38132	MCM7	95 kDa		unknown	795650	1177800	827340	882390	0	2868700	0	0	1	1	1	1	0	1	1	0	5	5	5	6	0	4	1	0
Cluster of Protein SNQ2 OS=Saccharomyces cerevisiae (strain ATCC 204508 / S288c) OX=559292 GN=SNQ2 PE=1 SV=2 (P32568)	P32568 [2]	SNQ2	169 kDa	TRUE	unknown	1096100	657700	1142400	1366200	0	0	0	0	1	1	1	1	0	0.97	0.97	0	7	5	5	8	0	1	1	0
Ribosomal RNA-processing protein 1 OS=Saccharomyces cerevisiae (strain ATCC 204508 / S288c) OX=559292 GN=RRP1 PE=1 SV=2	P35178	RRP1	33 kDa		unknown	16471000	10712000	12638000	15747000	0	989320	0	0	1	1	1	1	0.3	0.78	0.42	0.19	7	4	5	7	0	1	0	0
Cytoplasmic export protein 1 OS=Saccharomyces cerevisiae (strain ATCC 204508 / S288c) OX=559292 GN=CEX1 PE=1 SV=1	Q12453	CEX1	85 kDa		unknown	3798400	1944900	3010900	954210	0	925620	0	-1	1	1	1	1	0	0.97	0	0	9	7	6	3	0	1	0	0
Importin alpha re-exporter OS=Saccharomyces cerevisiae (strain ATCC 204508 / S288c) OX=559292 GN=CSE1 PE=1 SV=2	P33307	CSE1	109 kDa		unknown	1756000	1465700	3033500	2137300	0	0	928350	-1	1	1	1	1	0	0	0.97	0	5	5	7	8	0	0	1	0
DNA-directed RNA polymerase III subunit RPC3 OS=Saccharomyces cerevisiae (strain ATCC 204508 / S288c) OX=559292 GN=RPC82 PE=1 SV=2	P32349	RPC82	74 kDa		unknown	1971600	829700	2580900	3052900	0	0	0	0	1	1	1	1	0	0.05	0	0.06	8	3	8	8	0	0	0	0
Nucleolar protein 16 OS=Saccharomyces cerevisiae (strain ATCC 204508 / S288c) OX=559292 GN=NOP16 PE=1 SV=1	P40007	NOP16	27 kDa		unknown	9744500	8907800	10668000	16204000	-1	6750200	6277900	8137200	1	1	1	1	0	0.97	0.92	0.97	6	4	5	6	0	1	1	1
S-adenosyl-L-methionine-dependent tRNA 4-demethylwyosine synthase OS=Saccharomyces cerevisiae (strain ATCC 204508 / S288c) OX=559292 GN=TYW1 PE=1 SV=1	Q08960	TYW1	90 kDa		unknown	710860	1010100	1213200	2013100	-1	902900	863110	-1	1	1	1	1	0	1	1	0	5	6	5	6	0	2	2	0
Importin beta-like protein KAP122 OS=Saccharomyces cerevisiae (strain ATCC 204508 / S288c) OX=559292 GN=KAP122 PE=1 SV=1	P32767	KAP122	124 kDa		unknown	1357400	970920	908460	1243900	0	1224100	640850	-1	1	1	1	1	0	1	0.69	0	7	6	5	4	0	2	1	0
Proteasome subunit alpha type-6 OS=Saccharomyces cerevisiae (strain ATCC 204508 / S288c) OX=559292 GN=PRE5 PE=1 SV=1	P40302	PRE5	26 kDa		unknown	7549000	7827300	12135000	7468800	0	7030600	1961700	0	1	1	1	1	0	1	0.67	0	6	5	5	7	0	2	1	0
U3 small nucleolar RNA-associated protein 9 OS=Saccharomyces cerevisiae (strain ATCC 204508 / S288c) OX=559292 GN=UTP9 PE=1 SV=1	P38882	UTP9	65 kDa		unknown	5706500	1754800	5402100	2700000	0	0	541170	0	1	1	1	1	0	0	0.88	0	8	4	8	5	0	0	1	0
Nucleoporin NUP170 OS=Saccharomyces cerevisiae (strain ATCC 204508 / S288c) OX=559292 GN=NUP170 PE=1 SV=1	P38181	NUP170	169 kDa		unknown	155700	362420	537890	699720	0	355290	0	0	1	1	1	1	0	0.78	0	0	2	5	7	9	0	1	0	0
Probable ATP-dependent RNA helicase DHR2 OS=Saccharomyces cerevisiae (strain ATCC 204508 / S288c) OX=559292 GN=DHR2 PE=1 SV=1	P36009	DHR2	83 kDa		unknown	1731700	696770	1028100	487930	0	0	0	0	1	1	1	1	0.09	0	0	0	9	5	7	3	0	0	0	0
Cluster of Eukaryotic initiation factor 4F subunit p150 OS=Saccharomyces cerevisiae (strain ATCC 204508 / S288c) OX=559292 GN=TIF4631 PE=1 SV=2 (P39935)	P39935 [2]	TIF4631	107 kDa	TRUE	unknown	1771100	1060000	3003000	866080	0	0	0	0	1	1	1	1	0.07	0	0	0	7	4	9	5	0	0	0	0
ATP-dependent RNA helicase DBP10 OS=Saccharomyces cerevisiae (strain ATCC 204508 / S288c) OX=559292 GN=DBP10 PE=1 SV=2	Q12389	DBP10	113 kDa		unknown	1638900	1212800	1871400	2170600	0	0	0	0	1	1	1	1	0	0	0	0	7	4	7	7	0	0	0	0
DNA-directed RNA polymerase III subunit RPC1 OS=Saccharomyces cerevisiae (strain ATCC 204508 / S288c) OX=559292 GN=RPO31 PE=1 SV=1	P04051	RPO31	162 kDa		unknown	365060	272650	667500	926970	0	0	0	0	1	1	1	1	0	0	0	0	6	4	7	9	0	0	0	0
Periodic tryptophan protein 1 OS=Saccharomyces cerevisiae (strain ATCC 204508 / S288c) OX=559292 GN=PWP1 PE=1 SV=1	P21304	PWP1	64 kDa		unknown	4892200	3822100	6555000	5004000	0	0	0	0	1	1	1	1	0	0	0	0	5	5	8	7	0	0	0	0
U3 small nucleolar RNA-associated protein 6 OS=Saccharomyces cerevisiae (strain ATCC 204508 / S288c) OX=559292 GN=UTP6 PE=1 SV=2	Q02354	UTP6	52 kDa		unknown	4753200	2116500	4178900	1007500	0	-1	-1	0	1	1	1	1	0	0	0	0	9	6	8	3	0	0	0	0
Translation machinery-associated protein 46 OS=Saccharomyces cerevisiae (strain ATCC 204508 / S288c) OX=559292 GN=TMA46 PE=1 SV=2	Q12000	TMA46	40 kDa		unknown	20537000	1824500	19214000	3767600	0	0	-1	0	1	1	1	1	0	0	0	0	12	2	9	3	0	0	0	0
Glucan 1,3-beta-glucosidase OS=Saccharomyces cerevisiae (strain ATCC 204508 / S288c) OX=559292 GN=BGL2 PE=1 SV=1	P15703	BGL2	34 kDa		unknown	7710500	8532700	12120000	15003000	1343600	9844600	4154500	4916500	1	1	1	1	0.97	1	1	0.97	4	4	5	6	1	2	1	1
Pyrroline-5-carboxylate reductase OS=Saccharomyces cerevisiae (strain ATCC 204508 / S288c) OX=559292 GN=PRO3 PE=1 SV=1	P32263	PRO3	30 kDa		unknown	13989000	12344000	15040000	11008000	2577600	8928500	13636000	5550900	1	1	1	1	1	1	1	0.54	4	4	4	4	1	2	3	1
NADH-cytochrome b5 reductase 1 OS=Saccharomyces cerevisiae (strain ATCC 204508 / S288c) OX=559292 GN=CBR1 PE=1 SV=2	P38626	CBR1	31 kDa		unknown	3719600	3812100	5112400	7216700	-1	1083000	1868800	2124100	1	1	1	1	0	1	1	1	3	5	4	7	0	1	2	1
Serine/threonine-protein kinase CLA4 OS=Saccharomyces cerevisiae (strain ATCC 204508 / S288c) OX=559292 GN=CLA4 PE=1 SV=1	P48562	CLA4	94 kDa		unknown	850220	695510	601490	232900	0	924970	842720	0	1	1	1	1	0	1	1	0	6	5	3	4	0	3	3	0
Cyclin-dependent kinase 1 OS=Saccharomyces cerevisiae (strain ATCC 204508 / S288c) OX=559292 GN=CDC28 PE=1 SV=1	P00546	CDC28	34 kDa		unknown	2877300	3604300	5098200	1299900	-1	2797000	5267700	-1	1	1	1	1	0	1	1	0	4	5	7	2	0	3	4	0
Uncharacterized protein YOL098C OS=Saccharomyces cerevisiae (strain ATCC 204508 / S288c) OX=559292 GN=YOL098C PE=1 SV=1	Q12496	YOL098C	118 kDa		unknown	901130	438020	7784200	8258000	0	0	321670	0	1	1	1	1	0	0	0.52	0	6	5	8	5	0	0	1	0
Tricalbin-3 OS=Saccharomyces cerevisiae (strain ATCC 204508 / S288c) OX=559292 GN=TCB3 PE=1 SV=1	Q03640	TCB3	171 kDa		unknown	559850	187000	944330	1624600	0	-1	14115000	0	1	1	1	1	0	0	0.51	0	5	4	6	8	0	0	1	0
Mitochondrial import receptor subunit TOM40 OS=Saccharomyces cerevisiae (strain ATCC 204508 / S288c) OX=559292 GN=TOM40 PE=1 SV=1	P23644	TOM40	42 kDa		unknown	2009900	2067600	17064000	33076000	-1	-1	0	-1	1	1	1	1	0	0	0.11	0	3	3	8	10	0	0	0	0
Tyrosine-protein phosphatase YVH1 OS=Saccharomyces cerevisiae (strain ATCC 204508 / S288c) OX=559292 GN=YVH1 PE=1 SV=1	Q02256	YVH1	41 kDa		unknown	2200900	1553100	3167700	2351300	-1	-1	0	0	1	1	1	1	0	0	0	0	7	5	7	5	0	0	0	0
High mobility group protein 1 OS=Saccharomyces cerevisiae (strain ATCC 204508 / S288c) OX=559292 GN=HMO1 PE=1 SV=1	Q03973	HMO1	28 kDa		unknown	58782000	12743000	60223000	65349000	-1	-1	0	-1	1	1	1	1	0	0	0	0	7	4	7	7	0	0	0	0
Protein CAF40 OS=Saccharomyces cerevisiae (strain ATCC 204508 / S288c) OX=559292 GN=CAF40 PE=1 SV=1	P53829	CAF40	41 kDa		unknown	3819800	2694900	4418400	4046900	0	4667300	1809000	1218300	1	1	1	1	0	1	1	0.97	5	3	4	5	0	3	2	1
Leucine--tRNA ligase, cytoplasmic OS=Saccharomyces cerevisiae (strain ATCC 204508 / S288c) OX=559292 GN=CDC60 PE=1 SV=1	P26637	CDC60	124 kDa		unknown	292490	893410	494420	835970	0	1359500	498370	0	1	1	1	1	0	1	0.97	0.26	2	6	5	6	0	3	1	0
Dimethyladenosine transferase OS=Saccharomyces cerevisiae (strain ATCC 204508 / S288c) OX=559292 GN=DIM1 PE=1 SV=1	P41819	DIM1	36 kDa		unknown	5925100	4507600	5919400	4545100	0	1686900	2367400	0	1	1	1	1	0	1	0.97	0	6	6	5	4	0	2	1	0
Serine--tRNA ligase, cytoplasmic OS=Saccharomyces cerevisiae (strain ATCC 204508 / S288c) OX=559292 GN=SES1 PE=1 SV=2	P07284	SES1	53 kDa		unknown	542510	3658800	1303800	2523800	0	622630	0	861980	1	1	1	1	0	0.84	0	0.46	3	8	3	5	0	1	0	1
Glucose-signaling factor 2 OS=Saccharomyces cerevisiae (strain ATCC 204508 / S288c) OX=559292 GN=GSF2 PE=1 SV=1	Q04697	GSF2	46 kDa		unknown	4382000	5486200	5445600	7302500	0	1855700	-1	0	1	1	1	1	0.08	0.99	0	0.12	5	5	4	5	0	2	0	0
Squalene monooxygenase OS=Saccharomyces cerevisiae (strain ATCC 204508 / S288c) OX=559292 GN=ERG1 PE=1 SV=2	P32476	ERG1	55 kDa		unknown	2937600	2258300	1910400	3352400	0	1596100	0	0	1	1	1	1	0	1	0.08	0	6	5	5	5	0	2	0	0
Aromatic/aminoadipate aminotransferase 1 OS=Saccharomyces cerevisiae (strain ATCC 204508 / S288c) OX=559292 GN=ARO8 PE=1 SV=1	P53090	ARO8	56 kDa		unknown	3046600	726000	1534100	2217900	0	3401700	0	0	1	1	1	1	0	1	0	0	9	2	4	5	0	3	0	0
Asparagine--tRNA ligase, cytoplasmic OS=Saccharomyces cerevisiae (strain ATCC 204508 / S288c) OX=559292 GN=DED81 PE=1 SV=1	P38707	DED81	62 kDa		unknown	2096100	1858000	2423500	1988200	-1	1493700	-1	0	1	1	1	1	0	1	0	0	5	5	6	4	0	2	0	0
Protein SLY1 OS=Saccharomyces cerevisiae (strain ATCC 204508 / S288c) OX=559292 GN=SLY1 PE=1 SV=1	P22213	SLY1	75 kDa		unknown	1145300	1026300	2358600	921150	0	441610	-1	-1	1	1	1	1	0	0.97	0	0	6	5	8	4	0	1	0	0
General negative regulator of transcription subunit 3 OS=Saccharomyces cerevisiae (strain ATCC 204508 / S288c) OX=559292 GN=NOT3 PE=1 SV=2	P06102	NOT3	94 kDa		unknown	1328500	2025000	530540	1816600	0	0	0	0	1	1	1	1	0.17	0	0	0.05	7	6	3	7	0	0	0	0
Exportin-T OS=Saccharomyces cerevisiae (strain ATCC 204508 / S288c) OX=559292 GN=LOS1 PE=1 SV=1	P33418	LOS1	127 kDa		unknown	987350	1449800	1544200	873850	0	0	-1	0	1	1	1	1	0	0	0	0	6	7	7	3	0	0	0	0
Large subunit GTPase 1 OS=Saccharomyces cerevisiae (strain ATCC 204508 / S288c) OX=559292 GN=LSG1 PE=1 SV=1	P53145	LSG1	73 kDa		unknown	1970800	1013400	2165100	2079900	0	0	0	0	1	1	1	1	0	0	0	0	7	5	7	5	0	0	0	0
Prohibitin-1 OS=Saccharomyces cerevisiae (strain ATCC 204508 / S288c) OX=559292 GN=PHB1 PE=1 SV=2	P40961	PHB1	31 kDa		unknown	1347900	1898400	9380200	24089000	-1	-1	-1	-1	1	1	1	1	0	0	0	0	3	4	6	10	0	0	0	0
tRNA-aminoacylation cofactor ARC1 OS=Saccharomyces cerevisiae (strain ATCC 204508 / S288c) OX=559292 GN=ARC1 PE=1 SV=2	P46672	ARC1	42 kDa		unknown	3399700	3373600	4676600	2562500	0	0	-1	-1	1	1	1	1	0	0	0	0	5	5	8	5	0	0	0	0
Ribosome biogenesis protein TSR1 OS=Saccharomyces cerevisiae (strain ATCC 204508 / S288c) OX=559292 GN=TSR1 PE=1 SV=1	Q07381	TSR1	91 kDa		unknown	2628500	2488800	1992700	2333400	0	0	0	0	1	1	1	1	0	0	0	0	5	6	5	8	0	0	0	0
Adenylyltransferase and sulfurtransferase UBA4 OS=Saccharomyces cerevisiae (strain ATCC 204508 / S288c) OX=559292 GN=UBA4 PE=1 SV=1	P38820	UBA4	49 kDa		unknown	2399900	2408100	2798700	2058100	2166700	3825000	7183300	2115900	1	1	1	1	0.99	1	0.98	1	3	3	3	3	2	2	2	1
High-affinity glucose transporter HXT2 OS=Saccharomyces cerevisiae (strain ATCC 204508 / S288c) OX=559292 GN=HXT2 PE=1 SV=1	P23585	HXT2	60 kDa	TRUE	unknown	5306900	4117400	6707000	7615200	2767100	6259800	3553900	6587800	1	1	1	1	0.55	0.97	0.88	1	4	2	3	6	2	2	2	2
Ribosome biogenesis protein RPF2 OS=Saccharomyces cerevisiae (strain ATCC 204508 / S288c) OX=559292 GN=RPF2 PE=1 SV=1	P36160	RPF2	40 kDa		unknown	11360000	12468000	9211100	12285000	2021400	5024300	-1	1707000	1	1	1	1	0.97	1	0	0.97	6	5	3	5	1	2	0	1
37S ribosomal protein S5, mitochondrial OS=Saccharomyces cerevisiae (strain ATCC 204508 / S288c) OX=559292 GN=MRPS5 PE=1 SV=1	P33759	MRPS5	35 kDa		unknown	4560900	7489300	3610600	3553700	0	3250800	3600600	5930800	1	1	1	1	0	1	0.77	1	4	6	4	4	0	1	1	1
DNA mismatch repair protein MSH2 OS=Saccharomyces cerevisiae (strain ATCC 204508 / S288c) OX=559292 GN=MSH2 PE=1 SV=2	P25847	MSH2	109 kDa		unknown	938010	484990	1118900	947650	631630	675040	401410	0	1	1	1	1	0.28	0.97	0.96	0	5	4	5	5	1	1	1	0
mRNA transport regulator MTR10 OS=Saccharomyces cerevisiae (strain ATCC 204508 / S288c) OX=559292 GN=MTR10 PE=1 SV=1	Q99189	MTR10	111 kDa		unknown	1231800	860920	1239900	459470	-1	287580	360860	0	1	1	1	1	0	0.41	0.92	0.16	7	5	5	3	0	1	1	0
Copper transport protein 86 OS=Saccharomyces cerevisiae (strain ATCC 204508 / S288c) OX=559292 GN=CTR86 PE=1 SV=1	P25355	CTR86	65 kDa		unknown	1626300	845200	1899600	507770	0	1410200	-1	-1	1	1	1	1	0.07	1	0	0	6	4	8	2	0	2	0	0
Carbamoyl-phosphate synthase arginine-specific large chain OS=Saccharomyces cerevisiae (strain ATCC 204508 / S288c) OX=559292 GN=CPA2 PE=1 SV=1	P03965	CPA2	124 kDa	TRUE	unknown	1300400	186230	1723700	1288500	0	0	3007500	0	1	1	1	1	0	0	1	0	5	2	4	4	0	0	2	0
T-complex protein 1 subunit alpha OS=Saccharomyces cerevisiae (strain ATCC 204508 / S288c) OX=559292 GN=TCP1 PE=1 SV=2	P12612	TCP1	60 kDa		unknown	1460200	1689600	3002700	1837600	-1	0	610170	0	1	1	1	1	0	0	1	0	4	4	7	5	0	0	2	0
FACT complex subunit SPT16 OS=Saccharomyces cerevisiae (strain ATCC 204508 / S288c) OX=559292 GN=SPT16 PE=1 SV=1	P32558	SPT16	119 kDa		unknown	147160	285380	481500	523400	0	181760	0	0	1	1	1	1	0	0.89	0	0	4	4	6	7	0	1	0	0
Increased sodium tolerance protein 2 OS=Saccharomyces cerevisiae (strain ATCC 204508 / S288c) OX=559292 GN=IST2 PE=1 SV=2	P38250	IST2	106 kDa		unknown	591620	1233000	2405000	3291900	0	-1	0	-1	1	1	1	1	0	0	0	0	4	5	6	8	0	0	0	0
37S ribosomal protein NAM9, mitochondrial OS=Saccharomyces cerevisiae (strain ATCC 204508 / S288c) OX=559292 GN=NAM9 PE=1 SV=2	P27929	NAM9	56 kDa		unknown	2221600	2247900	1637300	1575900	0	0	0	-1	1	1	1	1	0	0	0	0	6	7	5	5	0	0	0	0
Hexaprenyl pyrophosphate synthase, mitochondrial OS=Saccharomyces cerevisiae (strain ATCC 204508 / S288c) OX=559292 GN=COQ1 PE=1 SV=1	P18900	COQ1	53 kDa		unknown	2801100	2593500	2650200	2446400	-1	0	-1	-1	1	1	1	1	0	0	0	0	6	6	5	6	0	0	0	0
Ribosome assembly protein SQT1 OS=Saccharomyces cerevisiae (strain ATCC 204508 / S288c) OX=559292 GN=SQT1 PE=1 SV=2	P35184	SQT1	47 kDa		unknown	8218900	8350700	14618000	12117000	-1	-1	-1	-1	1	1	1	1	0	0	0	0	5	4	6	8	0	0	0	0
Nucleoporin SEH1 OS=Saccharomyces cerevisiae (strain ATCC 204508 / S288c) OX=559292 GN=SEH1 PE=1 SV=1	P53011	SEH1	39 kDa		unknown	2634500	649960	2619000	1702400	1497400	8839500	3711400	0	1	1	1	1	0.56	1	1	0.98	4	2	4	3	1	4	2	1
General amino-acid permease GAP1 OS=Saccharomyces cerevisiae (strain ATCC 204508 / S288c) OX=559292 GN=GAP1 PE=1 SV=2	P19145	GAP1	66 kDa		unknown	1281000	3113300	3790800	5460800	-1	996720	0	2306100	1	1	1	1	0	1	0.35	0.99	2	6	5	5	0	1	0	2
Cluster of Peroxiredoxin TSA1 OS=Saccharomyces cerevisiae (strain ATCC 204508 / S288c) OX=559292 GN=TSA1 PE=1 SV=3 (P34760)	P34760 [2]	TSA1	22 kDa	TRUE	unknown	8584200	8537800	14858000	16837000	-1	0	0	0	1	1	1	1	0	0.97	0.97	0.4	4	3	5	7	0	1	1	1
Eukaryotic translation initiation factor 3 subunit G OS=Saccharomyces cerevisiae (strain ATCC 204508 / S288c) OX=559292 GN=TIF35 PE=1 SV=1	Q04067	TIF35	31 kDa		unknown	14835000	6898700	10583000	6719800	-1	4166400	2863500	-1	1	1	1	1	0	1	1	0	6	4	4	4	0	2	1	0
Dihydroxy-acid dehydratase, mitochondrial OS=Saccharomyces cerevisiae (strain ATCC 204508 / S288c) OX=559292 GN=ILV3 PE=1 SV=2	P39522	ILV3	63 kDa		unknown	839460	2541900	995350	1351500	0	881680	-1	-1	1	1	1	1	0	1	0	0	4	6	5	6	0	1	0	0
RNA 3'-terminal phosphate cyclase-like protein OS=Saccharomyces cerevisiae (strain ATCC 204508 / S288c) OX=559292 GN=RCL1 PE=1 SV=1	Q08096	RCL1	40 kDa		unknown	5430100	3603200	6729100	3994700	-1	-1	1854500	-1	1	1	1	1	0	0	0.97	0	6	5	6	4	0	0	1	0
ATP-dependent RNA helicase ROK1 OS=Saccharomyces cerevisiae (strain ATCC 204508 / S288c) OX=559292 GN=ROK1 PE=1 SV=1	P45818	ROK1	64 kDa		unknown	2426400	1619300	3610300	1332200	0	-1	0	0	1	1	1	1	0	0	0.12	0.1	5	4	8	3	0	0	0	0
Replication factor C subunit 1 OS=Saccharomyces cerevisiae (strain ATCC 204508 / S288c) OX=559292 GN=RFC1 PE=1 SV=1	P38630	RFC1	95 kDa		unknown	1287800	487500	675620	1184100	0	0	0	0	1	1	1	1	0	0	0	0	7	3	5	7	0	0	0	0
Vacuolar protein 8 OS=Saccharomyces cerevisiae (strain ATCC 204508 / S288c) OX=559292 GN=VAC8 PE=1 SV=3	P39968	VAC8	63 kDa		unknown	3340500	3271100	2090300	4372600	0	-1	-1	-1	1	1	1	1	0	0	0	0	5	4	4	9	0	0	0	0
60S ribosomal subunit assembly/export protein LOC1 OS=Saccharomyces cerevisiae (strain ATCC 204508 / S288c) OX=559292 GN=LOC1 PE=1 SV=1	P43586	LOC1	24 kDa		unknown	31593000	24866000	32782000	51660000	-1	-1	-1	-1	1	1	1	1	0	0	0	0	5	4	6	6	0	0	0	0
Proteasome subunit alpha type-4 OS=Saccharomyces cerevisiae (strain ATCC 204508 / S288c) OX=559292 GN=PRE6 PE=1 SV=1	P40303	PRE6	28 kDa		unknown	4832100	5083900	10071000	6982900	1444000	7619100	3899300	6522900	1	1	1	1	0.86	1	0.97	0.97	2	4	5	4	1	2	1	1
Cystathionine gamma-lyase OS=Saccharomyces cerevisiae (strain ATCC 204508 / S288c) OX=559292 GN=CYS3 PE=1 SV=2	P31373	CYS3	43 kDa		unknown	3731100	5724000	3460300	2500200	0	6065000	2415600	3111900	1	1	1	1	0	1	0.97	0.97	5	5	3	2	0	3	1	1
Ribonucleoside-diphosphate reductase small chain 1 OS=Saccharomyces cerevisiae (strain ATCC 204508 / S288c) OX=559292 GN=RNR2 PE=1 SV=2	P09938	RNR2	46 kDa		unknown	545610	2459600	826170	1300600	0	1210800	686870	1095700	1	1	1	1	0	0.97	0.91	0.9	2	6	3	5	0	1	1	1
26S proteasome regulatory subunit RPN3 OS=Saccharomyces cerevisiae (strain ATCC 204508 / S288c) OX=559292 GN=RPN3 PE=1 SV=5	P40016	RPN3	60 kDa		unknown	1732600	1126400	2333300	1294600	0	646880	775310	0	1	1	1	1	0.1	0.97	1	0.45	3	4	5	5	0	1	2	0
Coatomer subunit epsilon OS=Saccharomyces cerevisiae (strain ATCC 204508 / S288c) OX=559292 GN=SEC28 PE=1 SV=2	P40509	SEC28	34 kDa		unknown	6593100	8424900	12647000	5928000	-1	3357800	3717600	-1	1	1	1	1	0	1	0.97	0	4	6	5	4	0	1	1	0
UPF0674 endoplasmic reticulum membrane protein YNR021W OS=Saccharomyces cerevisiae (strain ATCC 204508 / S288c) OX=559292 GN=YNR021W PE=1 SV=3	P53723	YNR021W	47 kDa		unknown	2754900	3070800	8652700	5344800	0	1431300	3173300	-1	1	1	1	1	0	0.97	0.97	0	4	5	5	4	0	1	1	0
Histone H2A.1 OS=Saccharomyces cerevisiae (strain ATCC 204508 / S288c) OX=559292 GN=HTA1 PE=1 SV=2	P04911 (+1)	HTA1	14 kDa	TRUE	unknown	195740000	112180000	168150000	132310000	18601000	8484800	10148000	13429000	1	1	1	1	0.79	0.09	0.09	0.36	4	4	4	4	1	1	1	1
Heat shock protein 26 OS=Saccharomyces cerevisiae (strain ATCC 204508 / S288c) OX=559292 GN=HSP26 PE=1 SV=3	P15992	HSP26	24 kDa		unknown	9368100	11603000	7276500	7285700	0	11838000	0	0	1	1	1	1	0.13	0.97	0	0	5	5	4	5	0	1	0	0
ATPase family gene 2 protein OS=Saccharomyces cerevisiae (strain ATCC 204508 / S288c) OX=559292 GN=AFG2 PE=1 SV=1	P32794	AFG2	85 kDa		unknown	769150	1099600	388590	270470	-1	0	846630	0	1	1	1	1	0	0.13	0.97	0	4	7	4	3	0	0	1	0
Lipoyl synthase, mitochondrial OS=Saccharomyces cerevisiae (strain ATCC 204508 / S288c) OX=559292 GN=LIP5 PE=1 SV=1	P32875	LIP5	46 kDa		unknown	2022500	1191500	2931800	2524900	0	1524100	-1	-1	1	1	1	1	0	0.97	0	0	5	5	6	4	0	1	0	0
Low specificity L-threonine aldolase OS=Saccharomyces cerevisiae (strain ATCC 204508 / S288c) OX=559292 GN=GLY1 PE=1 SV=2	P37303	GLY1	43 kDa		unknown	1464800	3324800	2137800	2588900	0	1212700	-1	-1	1	1	1	1	0	0.97	0	0	5	6	4	4	0	2	0	0
Alanine--tRNA ligase, mitochondrial OS=Saccharomyces cerevisiae (strain ATCC 204508 / S288c) OX=559292 GN=ALA1 PE=1 SV=3	P40825	ALA1	110 kDa		unknown	600370	763800	779650	366840	0	0	325420	0	1	1	1	1	0	0	0.78	0	4	6	5	3	0	0	1	0
Proteasome subunit alpha type-3 OS=Saccharomyces cerevisiae (strain ATCC 204508 / S288c) OX=559292 GN=PRE9 PE=1 SV=1	P23638	PRE9	29 kDa		unknown	3496900	5147300	8992200	6169400	-1	0	-1	0	1	1	1	1	0	0.16	0	0	4	4	8	4	0	0	0	0
Replication factor C subunit 4 OS=Saccharomyces cerevisiae (strain ATCC 204508 / S288c) OX=559292 GN=RFC4 PE=1 SV=1	P40339	RFC4	36 kDa		unknown	1590800	1700900	1993200	2470700	0	0	0	-1	1	1	1	1	0	0	0	0	4	5	3	7	0	0	0	0
Chromatin-remodeling ATPase INO80 OS=Saccharomyces cerevisiae (strain ATCC 204508 / S288c) OX=559292 GN=INO80 PE=1 SV=1	P53115	INO80	171 kDa		unknown	885940	346960	526120	689730	0	0	0	0	1	1	1	1	0	0	0	0	6	4	5	6	0	0	0	0
Replication factor C subunit 2 OS=Saccharomyces cerevisiae (strain ATCC 204508 / S288c) OX=559292 GN=RFC2 PE=1 SV=1	P40348	RFC2	40 kDa		unknown	2343700	3236800	1611900	4391400	0	0	-1	0	1	1	1	1	0	0	0	0	5	6	4	6	0	0	0	0
Protein MON2 OS=Saccharomyces cerevisiae (strain ATCC 204508 / S288c) OX=559292 GN=MON2 PE=1 SV=1	P48563	MON2	187 kDa		unknown	162660	410260	349530	284810	0	0	0	0	1	1	1	1	0	0	0	0	5	8	5	3	0	0	0	0
Proteasome subunit alpha type-5 OS=Saccharomyces cerevisiae (strain ATCC 204508 / S288c) OX=559292 GN=PUP2 PE=1 SV=2	P32379	PUP2	29 kDa		unknown	7868800	5182700	3981300	6018800	1126000	3080600	2758500	3277200	1	1	1	1	0.87	0.88	1	0.9	5	4	3	3	1	1	2	1
TATA-box-binding protein OS=Saccharomyces cerevisiae (strain ATCC 204508 / S288c) OX=559292 GN=SPT15 PE=1 SV=3	P13393	SPT15	27 kDa		unknown	4535700	5244000	2852100	2734000	5728000	7114500	937230	5732400	1	1	0.98	0.97	1	1	0.41	0.99	3	4	2	2	2	4	1	2
Cytochrome c oxidase subunit 2 OS=Saccharomyces cerevisiae (strain ATCC 204508 / S288c) OX=559292 GN=COX2 PE=1 SV=1	P00410	COX2	29 kDa		unknown	10280000	9181100	22774000	39570000	2434500	4640800	3905500	-1	1	1	1	1	0.95	0.97	0.97	0	4	4	4	5	1	1	1	0
mRNA-binding protein PUF3 OS=Saccharomyces cerevisiae (strain ATCC 204508 / S288c) OX=559292 GN=PUF3 PE=1 SV=1	Q07807	PUF3	98 kDa		unknown	588690	579480	685310	858130	49705000	34851000	895920	0	1	1	1	1	0.31	1	1	0	3	3	4	5	1	2	2	0
37S ribosomal protein MRP4, mitochondrial OS=Saccharomyces cerevisiae (strain ATCC 204508 / S288c) OX=559292 GN=MRP4 PE=1 SV=1	P32902	MRP4	44 kDa		unknown	3923900	3957700	2162200	-1	0	2962000	1937900	2311300	1	1	1	0	0	1	0.99	0.9	5	7	3	0	0	2	1	1
Pre-rRNA-processing protein PNO1 OS=Saccharomyces cerevisiae (strain ATCC 204508 / S288c) OX=559292 GN=PNO1 PE=1 SV=1	Q99216	PNO1	30 kDa		unknown	7947500	7551200	10290000	7045100	3437800	5337200	0	0	1	1	1	1	0.5	0.97	0	0	4	6	4	4	1	1	0	0
54S ribosomal protein L17, mitochondrial OS=Saccharomyces cerevisiae (strain ATCC 204508 / S288c) OX=559292 GN=MRPL17 PE=1 SV=2	P36528	MRPL17	32 kDa		unknown	3251700	2570000	2527800	2673500	0	1802300	666610	0	1	1	1	1	0	1	0.41	0	5	3	4	4	0	3	1	0
DnaJ-related protein SCJ1 OS=Saccharomyces cerevisiae (strain ATCC 204508 / S288c) OX=559292 GN=SCJ1 PE=1 SV=2	P25303	SCJ1	42 kDa		unknown	3361300	2884700	3859100	4007400	0	1766600	-1	-1	1	1	1	1	0	1	0	0	5	5	5	3	0	2	0	0
37S ribosomal protein S35, mitochondrial OS=Saccharomyces cerevisiae (strain ATCC 204508 / S288c) OX=559292 GN=MRPS35 PE=1 SV=1	P53292	MRPS35	40 kDa		unknown	2874700	2985600	3216000	2733000	-1	0	-1	0	1	1	1	1	0	0.61	0	0.23	3	4	6	5	0	1	0	0
E3 ubiquitin-protein ligase listerin OS=Saccharomyces cerevisiae (strain ATCC 204508 / S288c) OX=559292 GN=RKR1 PE=1 SV=1	Q04781	RKR1	180 kDa		unknown	598840	307840	570230	227560	0	0	0	0	1	1	1	1	0	0	0.36	0	7	5	4	3	0	0	0	0
CCR4-Not complex 3'-5'-exoribonuclease subunit Ccr4 OS=Saccharomyces cerevisiae (strain ATCC 204508 / S288c) OX=559292 GN=CCR4 PE=1 SV=2	P31384	CCR4	95 kDa		unknown	1034400	2170600	1800400	1217200	-1	0	-1	508440	1	1	1	1	0	0	0	0.28	4	6	5	4	0	0	0	1
Eukaryotic translation initiation factor 2 subunit gamma OS=Saccharomyces cerevisiae (strain ATCC 204508 / S288c) OX=559292 GN=GCD11 PE=1 SV=1	P32481	GCD11	58 kDa		unknown	3982000	2575600	3679900	3277500	0	0	-1	-1	1	1	1	1	0	0.22	0	0	6	3	5	5	0	1	0	0
SRP-independent targeting protein 3 OS=Saccharomyces cerevisiae (strain ATCC 204508 / S288c) OX=559292 GN=PHO88 PE=1 SV=1	P38264	PHO88	21 kDa		unknown	2645000	1767000	16434000	11520000	-1	0	-1	0	1	1	1	1	0	0	0	0	3	2	8	7	0	0	0	0
Flavoprotein-like protein YCP4 OS=Saccharomyces cerevisiae (strain ATCC 204508 / S288c) OX=559292 GN=YCP4 PE=1 SV=1	P25349	YCP4	26 kDa		unknown	3094800	1930700	4956100	3441300	0	0	0	-1	1	1	1	1	0	0	0	0	5	4	6	5	0	0	0	0
Phosphatidylinositol-3-phosphatase SAC1 OS=Saccharomyces cerevisiae (strain ATCC 204508 / S288c) OX=559292 GN=SAC1 PE=1 SV=1	P32368	SAC1	71 kDa		unknown	1106100	999440	2548300	1263600	0	0	0	0	1	1	1	1	0	0	0	0	4	3	8	5	0	0	0	0
Pumilio homology domain family member 6 OS=Saccharomyces cerevisiae (strain ATCC 204508 / S288c) OX=559292 GN=PUF6 PE=1 SV=1	Q04373	PUF6	75 kDa		unknown	1847600	995440	2990900	1213900	0	0	0	0	1	1	1	1	0	0	0	0	6	4	6	4	0	0	0	0
N-terminal acetyltransferase A complex subunit NAT1 OS=Saccharomyces cerevisiae (strain ATCC 204508 / S288c) OX=559292 GN=NAT1 PE=1 SV=2	P12945	NAT1	99 kDa		unknown	1468900	2644500	2716200	885480	0	-1	0	0	1	1	1	1	0	0	0	0	3	6	8	3	0	0	0	0
40S ribosomal protein S30-B OS=Saccharomyces cerevisiae (strain ATCC 204508 / S288c) OX=559292 GN=RPS30B PE=1 SV=1	P0CX34	RPS30B	7 kDa		unknown	133530000	200290000	254110000	160730000	102140000	66293000	109310000	38959000	1	1	1	1	1	1	1	0.97	3	3	3	2	3	2	2	1
Ribosome biogenesis protein 15 OS=Saccharomyces cerevisiae (strain ATCC 204508 / S288c) OX=559292 GN=NOP15 PE=1 SV=1	P53927	NOP15	25 kDa		unknown	17033000	24368000	17981000	17914000	4408200	23059000	5856000	10132000	1	1	1	1	1	1	0.97	0.97	3	4	3	3	2	2	1	1
Protein transport protein SEC61 OS=Saccharomyces cerevisiae (strain ATCC 204508 / S288c) OX=559292 GN=SEC61 PE=1 SV=1	P32915	SEC61	53 kDa		unknown	7796300	2873400	10112000	644700	2889400	3751400	3869800	3080800	1	1	1	1	0.89	0.73	0.88	0.9	4	4	3	2	1	1	1	1
Protein SSD1 OS=Saccharomyces cerevisiae (strain ATCC 204508 / S288c) OX=559292 GN=SSD1 PE=1 SV=1	P24276	SSD1	140 kDa		unknown	21697000	20832000	21285000	23504000	68842000	49398000	55452000	0	1	1	1	1	0.99	0.65	0.76	0	4	3	3	3	3	1	1	0
GMP synthase [glutamine-hydrolyzing] OS=Saccharomyces cerevisiae (strain ATCC 204508 / S288c) OX=559292 GN=GUA1 PE=1 SV=4	P38625	GUA1	58 kDa		unknown	1081000	3167600	1220800	2708900	0	1806000	0	1826600	1	1	1	1	0	0.97	0	0.82	2	6	4	5	0	1	0	1
Phosphomannomutase OS=Saccharomyces cerevisiae (strain ATCC 204508 / S288c) OX=559292 GN=SEC53 PE=1 SV=1	P07283	SEC53	29 kDa		unknown	3371300	2034100	6212400	1248500	-1	891550	1548300	-1	1	1	1	1	0	1	0.41	0	4	3	6	2	0	2	1	0
SED5-binding protein 2 OS=Saccharomyces cerevisiae (strain ATCC 204508 / S288c) OX=559292 GN=SFB2 PE=1 SV=1	P53953	SFB2	99 kDa		unknown	240300	641740	518380	776650	0	394950	433560	0	1	1	1	1	0	0.8	0.41	0.15	3	5	4	4	0	1	1	0
Elongation factor Tu, mitochondrial OS=Saccharomyces cerevisiae (strain ATCC 204508 / S288c) OX=559292 GN=TUF1 PE=1 SV=1	P02992	TUF1	48 kDa		unknown	876200	729620	2778300	1463900	0	0	3287700	0	1	1	1	1	0	0.16	1	0	3	2	6	3	0	0	2	0
Ribosome biogenesis protein NOP53 OS=Saccharomyces cerevisiae (strain ATCC 204508 / S288c) OX=559292 GN=NOP53 PE=1 SV=1	Q12080	NOP53	53 kDa		unknown	2297900	2597600	182300	2390000	0	3192100	0	0	1	1	0.5	1	0	1	0	0.62	4	4	2	5	0	3	0	1
ARF guanine-nucleotide exchange factor 2 OS=Saccharomyces cerevisiae (strain ATCC 204508 / S288c) OX=559292 GN=GEA2 PE=1 SV=1	P39993	GEA2	166 kDa	TRUE	unknown	733300	412440	280030	347400	0	0	0	310100	1	1	1	1	0	0	0.12	0.9	7	5	3	2	0	0	0	1
ADP-ribosylation factor 1 OS=Saccharomyces cerevisiae (strain ATCC 204508 / S288c) OX=559292 GN=ARF1 PE=1 SV=3	P11076	ARF1	21 kDa		unknown	7432100	6286800	6398200	2563400	0	0	1473100	-1	1	1	1	1	0	0	0.97	0	6	5	4	3	0	0	1	0
DNA polymerase delta catalytic subunit OS=Saccharomyces cerevisiae (strain ATCC 204508 / S288c) OX=559292 GN=POL3 PE=1 SV=4	P15436	POL3	125 kDa		unknown	419530	472450	358120	482560	0	242150	0	0	1	1	1	1	0	0.96	0	0	5	5	3	5	0	1	0	0
54S ribosomal protein L40, mitochondrial OS=Saccharomyces cerevisiae (strain ATCC 204508 / S288c) OX=559292 GN=MRPL40 PE=1 SV=2	P36534	MRPL40	34 kDa		unknown	3429100	4702300	4081400	4187100	0	712500	898490	-1	1	1	1	1	0	0.41	0.41	0	3	6	4	4	0	1	1	0
Translationally-controlled tumor protein homolog OS=Saccharomyces cerevisiae (strain ATCC 204508 / S288c) OX=559292 GN=TMA19 PE=1 SV=1	P35691	TMA19	19 kDa		unknown	32772000	32176000	60424000	42591000	0	-1	2224700	-1	1	1	1	1	0	0	0.47	0	4	4	5	5	0	0	1	0
Mitochondrial genome maintenance protein MGM101 OS=Saccharomyces cerevisiae (strain ATCC 204508 / S288c) OX=559292 GN=MGM101 PE=1 SV=1	P32787	MGM101	30 kDa		unknown	4865900	1216100	4073700	5115100	0	0	0	0	1	1	1	1	0	0.1	0	0	5	2	5	5	0	0	0	0
Protein transport protein SEC23 OS=Saccharomyces cerevisiae (strain ATCC 204508 / S288c) OX=559292 GN=SEC23 PE=1 SV=1	P15303	SEC23	85 kDa		unknown	1626100	1472600	1748800	1279200	0	-1	-1	0	1	1	1	1	0	0	0	0	5	5	5	4	0	0	0	0
Chromatin structure-remodeling complex protein RSC8 OS=Saccharomyces cerevisiae (strain ATCC 204508 / S288c) OX=559292 GN=RSC8 PE=1 SV=1	P43609	RSC8	63 kDa		unknown	1772500	420500	1743500	1969400	0	0	0	0	1	1	1	1	0	0	0	0	6	2	5	6	0	0	0	0
Dolichyl-phosphate-mannose--protein mannosyltransferase 1 OS=Saccharomyces cerevisiae (strain ATCC 204508 / S288c) OX=559292 GN=PMT1 PE=1 SV=1	P33775	PMT1	93 kDa		unknown	670630	560760	4770900	4591000	0	0	0	0	1	1	1	1	0	0	0	0	3	3	7	6	0	0	0	0
Cytochrome P450 61 OS=Saccharomyces cerevisiae (strain ATCC 204508 / S288c) OX=559292 GN=ERG5 PE=1 SV=1	P54781	ERG5	61 kDa		unknown	1910000	2931000	1944500	1546600	-1	0	-1	0	1	1	1	1	0	0	0	0	5	7	3	3	0	0	0	0
37S ribosomal protein MRP1, mitochondrial OS=Saccharomyces cerevisiae (strain ATCC 204508 / S288c) OX=559292 GN=MRP1 PE=1 SV=2	P10662	MRP1	37 kDa		unknown	2854600	3807500	2286600	1805900	1409700	2489500	2022600	2123600	1	1	1	1	0.9	1	0.97	0.97	4	4	3	2	1	1	1	1
Glucan 1,3-beta-glucosidase I/II OS=Saccharomyces cerevisiae (strain ATCC 204508 / S288c) OX=559292 GN=EXG1 PE=1 SV=1	P23776	EXG1	51 kDa		unknown	4491500	3960300	3082100	3904900	-1	2749100	2702300	1437600	1	1	1	1	0	1	0.94	0.96	3	5	3	3	0	2	1	1
37S ribosomal protein MRP51, mitochondrial OS=Saccharomyces cerevisiae (strain ATCC 204508 / S288c) OX=559292 GN=MRP51 PE=1 SV=1	Q02950	MRP51	39 kDa		unknown	3218800	2451300	2034000	2203300	210120	2280600	797200	0	1	1	1	1	0.84	1	0.88	0	4	4	3	3	1	2	1	0
Pumilio homology domain family member 4 OS=Saccharomyces cerevisiae (strain ATCC 204508 / S288c) OX=559292 GN=PUF4 PE=1 SV=2	P25339	PUF4	98 kDa		unknown	1184800	1917800	1069100	508870	0	3478800	1088500	-1	1	1	1	1	0.12	1	0.89	0	3	6	3	2	0	2	1	0
Elongation of fatty acids protein 2 OS=Saccharomyces cerevisiae (strain ATCC 204508 / S288c) OX=559292 GN=ELO2 PE=1 SV=1	P25358	ELO2	40 kDa		unknown	17829000	16219000	21090000	12378000	-1	0	16379000	24309000	1	1	1	1	0	0	0.97	0.97	5	3	5	3	0	0	1	1
Cluster of Glycerol-1-phosphate phosphohydrolase 1 OS=Saccharomyces cerevisiae (strain ATCC 204508 / S288c) OX=559292 GN=GPP1 PE=1 SV=3 (P41277)	P41277 [2]	GPP1	28 kDa	TRUE	unknown	4513900	5793800	9782500	6129500	0	0	0	0	1	1	1	1	0	0.97	0.97	0	4	4	4	3	0	1	1	0
Importin beta-like protein KAP120 OS=Saccharomyces cerevisiae (strain ATCC 204508 / S288c) OX=559292 GN=KAP120 PE=1 SV=1	Q02932	KAP120	120 kDa		unknown	947030	1157700	1064200	434840	-1	593860	0	0	1	1	1	1	0	1	0	0	4	6	3	2	0	2	0	0
Ceramide very long chain fatty acid hydroxylase SCS7 OS=Saccharomyces cerevisiae (strain ATCC 204508 / S288c) OX=559292 GN=SCS7 PE=1 SV=1	Q03529	SCS7	45 kDa		unknown	3122700	3167500	6415800	4404100	-1	2771000	-1	-1	1	1	1	1	0	1	0	0	3	3	4	4	0	3	0	0
Protein HGH1 OS=Saccharomyces cerevisiae (strain ATCC 204508 / S288c) OX=559292 GN=HGH1 PE=1 SV=2	P48362	HGH1	45 kDa		unknown	1407900	1055500	3690500	1304900	0	450740	-1	-1	1	1	1	1	0	0.97	0	0	3	3	7	4	0	1	0	0
DNA replication licensing factor MCM2 OS=Saccharomyces cerevisiae (strain ATCC 204508 / S288c) OX=559292 GN=MCM2 PE=1 SV=2	P29469	MCM2	99 kDa		unknown	508470	301940	824360	315580	0	0	284390	-1	1	1	1	1	0	0	0.95	0	5	4	5	3	0	0	1	0
GTPase-activating protein BEM2/IPL2 OS=Saccharomyces cerevisiae (strain ATCC 204508 / S288c) OX=559292 GN=BEM2 PE=1 SV=1	P39960	BEM2	245 kDa		unknown	218430	294020	209750	42385	0	0	0	486270	1	1	1	0.97	0.16	0.1	0	0.36	4	6	3	1	0	0	0	1
Pre-mRNA-splicing factor ATP-dependent RNA helicase PRP43 OS=Saccharomyces cerevisiae (strain ATCC 204508 / S288c) OX=559292 GN=PRP43 PE=1 SV=1	P53131	PRP43	88 kDa		unknown	848960	1400900	433260	4459400	0	0	0	-1	1	1	1	1	0	0.05	0	0	4	7	2	5	0	0	0	0
Cytoplasmic 60S subunit biogenesis factor REI1 OS=Saccharomyces cerevisiae (strain ATCC 204508 / S288c) OX=559292 GN=REI1 PE=1 SV=3	P38344	REI1	46 kDa		unknown	2031600	2532000	2047600	2278100	-1	0	-1	0	1	1	1	1	0	0	0	0.05	5	4	3	6	0	0	0	0
Suppressor protein SRP40 OS=Saccharomyces cerevisiae (strain ATCC 204508 / S288c) OX=559292 GN=SRP40 PE=1 SV=2	P32583	SRP40	41 kDa		unknown	37135000	29376000	32243000	22189000	0	0	-1	-1	1	1	1	1	0	0	0	0	5	5	4	3	0	0	0	0
Chromatin structure-remodeling complex protein RSC3 OS=Saccharomyces cerevisiae (strain ATCC 204508 / S288c) OX=559292 GN=RSC3 PE=1 SV=1	Q06639	RSC3	102 kDa		unknown	1996600	286490	690510	757450	-1	0	-1	-1	1	1	1	1	0	0	0	0	8	2	5	3	0	0	0	0
ATP synthase subunit 5, mitochondrial OS=Saccharomyces cerevisiae (strain ATCC 204508 / S288c) OX=559292 GN=ATP5 PE=1 SV=1	P09457	ATP5	23 kDa		unknown	4875200	1640600	5953900	3779500	-1	0	0	-1	1	1	1	1	0	0	0	0	6	2	6	4	0	0	0	0
H/ACA ribonucleoprotein complex subunit NHP2 OS=Saccharomyces cerevisiae (strain ATCC 204508 / S288c) OX=559292 GN=NHP2 PE=1 SV=2	P32495	NHP2	17 kDa		unknown	52337000	47588000	84771000	30686000	0	-1	-1	0	1	1	1	1	0	0	0	0	5	4	6	3	0	0	0	0
Protein WHI3 OS=Saccharomyces cerevisiae (strain ATCC 204508 / S288c) OX=559292 GN=WHI3 PE=1 SV=1	P34761	WHI3	71 kDa		unknown	2977500	3171500	3561400	2443100	1149300	1902600	3216600	3235600	1	1	1	1	0.97	1	0.97	0.94	3	4	3	2	1	2	1	1
YAP1-binding protein 2 OS=Saccharomyces cerevisiae (strain ATCC 204508 / S288c) OX=559292 GN=YBP2 PE=1 SV=1	P53169	YBP2	73 kDa		unknown	803570	1347500	1321300	1286000	0	1030300	698710	0	1	1	1	1	0.89	1	1	0.05	2	3	3	3	1	2	2	0
Alanine/arginine aminopeptidase OS=Saccharomyces cerevisiae (strain ATCC 204508 / S288c) OX=559292 GN=AAP1 PE=1 SV=2	P37898	AAP1	98 kDa	TRUE	unknown	433860	337630	517240	302430	0	545310	351340	-1	1	1	1	1	0	1	1	0	4	3	3	3	0	2	2	0
Triosephosphate isomerase OS=Saccharomyces cerevisiae (strain ATCC 204508 / S288c) OX=559292 GN=TPI1 PE=1 SV=2	P00942	TPI1	27 kDa		unknown	8180800	5790700	16544000	14883000	0	1559700	0	0	1	1	1	1	0	0.94	0	0	3	2	6	5	0	1	0	0
Inclusion body clearance protein IML2 OS=Saccharomyces cerevisiae (strain ATCC 204508 / S288c) OX=559292 GN=IML2 PE=1 SV=1	P47031	IML2	83 kDa		unknown	760840	809920	1130300	627720	0	582810	-1	0	1	1	1	1	0.15	0.81	0	0	4	4	4	3	0	1	0	0
Serine/threonine-protein phosphatase PP2A-2 catalytic subunit OS=Saccharomyces cerevisiae (strain ATCC 204508 / S288c) OX=559292 GN=PPH22 PE=1 SV=1	P23595	PPH22	43 kDa		unknown	1441900	2664400	1784800	2798900	-1	0	0	-1	1	1	1	1	0	0	0.16	0	2	6	3	4	0	0	0	0
Casein kinase II subunit alpha' OS=Saccharomyces cerevisiae (strain ATCC 204508 / S288c) OX=559292 GN=CKA2 PE=1 SV=2	P19454	CKA2	39 kDa		unknown	3783000	5477300	5422900	5606600	0	0	0	-1	1	1	1	1	0	0	0	0	3	5	5	3	0	0	0	0
Transcription-associated protein 1 OS=Saccharomyces cerevisiae (strain ATCC 204508 / S288c) OX=559292 GN=TRA1 PE=1 SV=1	P38811	TRA1	433 kDa		unknown	197590	52679	56560	86559	0	0	0	0	1	1	1	1	0	0	0	0	6	4	3	3	0	0	0	0
54S ribosomal protein L24, mitochondrial OS=Saccharomyces cerevisiae (strain ATCC 204508 / S288c) OX=559292 GN=MRPL24 PE=1 SV=2	P36525	MRPL24	30 kDa		unknown	4545200	3160200	3242900	3998900	-1	0	0	-1	1	1	1	1	0	0	0	0	5	3	4	5	0	0	0	0
Serine/threonine-protein phosphatase PP1-2 OS=Saccharomyces cerevisiae (strain ATCC 204508 / S288c) OX=559292 GN=GLC7 PE=1 SV=1	P32598	GLC7	36 kDa		unknown	4831500	4157000	3927100	6376100	-1	-1	0	-1	1	1	1	1	0	0	0	0	3	4	4	6	0	0	0	0
Vesicle-associated membrane protein-associated protein SCS2 OS=Saccharomyces cerevisiae (strain ATCC 204508 / S288c) OX=559292 GN=SCS2 PE=1 SV=3	P40075	SCS2	27 kDa		unknown	3468900	5809100	8517600	8532500	-1	-1	0	-1	1	1	1	1	0	0	0	0	3	4	5	4	0	0	0	0
54S ribosomal protein L7, mitochondrial OS=Saccharomyces cerevisiae (strain ATCC 204508 / S288c) OX=559292 GN=MRPL7 PE=1 SV=2	P36519	MRPL7	33 kDa		unknown	2431700	3657300	2552500	4610300	0	-1	0	0	1	1	1	1	0	0	0	0	3	5	3	6	0	0	0	0
Protein SIS1 OS=Saccharomyces cerevisiae (strain ATCC 204508 / S288c) OX=559292 GN=SIS1 PE=1 SV=1	P25294	SIS1	38 kDa		unknown	3694000	1437000	2714800	2881700	-1	-1	-1	0	1	1	1	1	0	0	0	0	5	3	4	4	0	0	0	0
Metal resistance protein YCF1 OS=Saccharomyces cerevisiae (strain ATCC 204508 / S288c) OX=559292 GN=YCF1 PE=1 SV=2	P39109	YCF1	171 kDa		unknown	419110	133510	910120	515020	0	0	0	0	1	0.97	1	1	0	0	0	0	5	1	6	4	0	0	0	0
Anthranilate synthase component 1 OS=Saccharomyces cerevisiae (strain ATCC 204508 / S288c) OX=559292 GN=TRP2 PE=1 SV=4	P00899	TRP2	57 kDa		unknown	586060	1331700	710620	1425600	0	2227300	1603200	1028300	0.97	1	0.98	1	0	1	1	1	1	3	1	4	0	3	2	2
Cluster of GTP-binding protein YPT31/YPT8 OS=Saccharomyces cerevisiae (strain ATCC 204508 / S288c) OX=559292 GN=YPT31 PE=1 SV=3 (P38555)	P38555 [2]	YPT31	24 kDa	TRUE	unknown	2829900	3719200	1476700	1827100	-1	0	0	0	1	1	1	1	0	0.97	0	0.68	4	3	3	3	0	1	0	2
External NADH-ubiquinone oxidoreductase 1, mitochondrial OS=Saccharomyces cerevisiae (strain ATCC 204508 / S288c) OX=559292 GN=NDE1 PE=1 SV=1	P40215	NDE1	63 kDa		unknown	2728000	1253400	1751300	2303200	0	1081500	-1	0	1	1	1	1	0.65	0.97	0	0	4	3	3	4	1	1	0	0
Cytochrome b-c1 complex subunit Rieske, mitochondrial OS=Saccharomyces cerevisiae (strain ATCC 204508 / S288c) OX=559292 GN=RIP1 PE=1 SV=1	P08067	RIP1	23 kDa		unknown	3368900	6297400	11854000	28188000	-1	6236600	-1	0	1	1	1	1	0	1	0	0	2	3	3	5	0	2	0	0
37S ribosomal protein S24, mitochondrial OS=Saccharomyces cerevisiae (strain ATCC 204508 / S288c) OX=559292 GN=RSM24 PE=1 SV=1	Q03976	RSM24	37 kDa		unknown	3190800	1430500	2572400	1720800	0	0	634890	0	1	1	1	1	0	0	0.75	0	4	3	5	3	0	0	1	0
KRR1 small subunit processome component OS=Saccharomyces cerevisiae (strain ATCC 204508 / S288c) OX=559292 GN=KRR1 PE=1 SV=1	P25586	KRR1	37 kDa		unknown	4938800	2078000	3146200	612970	1299200	994150	0	0	1	1	1	0.48	0.43	0.33	0	0	5	5	3	1	1	1	0	0
54S ribosomal protein L4, mitochondrial OS=Saccharomyces cerevisiae (strain ATCC 204508 / S288c) OX=559292 GN=MRPL4 PE=1 SV=2	P36517	MRPL4	37 kDa		unknown	4372800	4316100	4497800	4272400	-1	-1	-1	0	1	1	1	1	0	0	0	0.16	4	4	4	3	0	0	0	0
37S ribosomal protein S17, mitochondrial OS=Saccharomyces cerevisiae (strain ATCC 204508 / S288c) OX=559292 GN=MRPS17 PE=1 SV=1	Q03246	MRPS17	28 kDa		unknown	3787500	3915600	3309700	2818100	0	0	0	-1	1	1	1	1	0	0	0.13	0	4	4	4	3	0	0	0	0
1-acyl-sn-glycerol-3-phosphate acyltransferase OS=Saccharomyces cerevisiae (strain ATCC 204508 / S288c) OX=559292 GN=SLC1 PE=1 SV=1	P33333	SLC1	34 kDa		unknown	5602900	4613900	8420300	6910800	0	0	-1	-1	1	1	1	1	0	0.06	0	0	5	2	5	4	0	0	0	0
Suppressor of glycerol defect protein 1 OS=Saccharomyces cerevisiae (strain ATCC 204508 / S288c) OX=559292 GN=SGD1 PE=1 SV=1	Q06132	SGD1	103 kDa		unknown	1192800	920740	1207900	751270	0	0	0	0	1	1	1	1	0	0	0	0	3	4	4	4	0	0	0	0
Ribosomal RNA small subunit methyltransferase NEP1 OS=Saccharomyces cerevisiae (strain ATCC 204508 / S288c) OX=559292 GN=EMG1 PE=1 SV=1	Q06287	EMG1	28 kDa		unknown	6658500	1587100	4774800	2011400	0	0	0	0	1	1	1	1	0	0	0	0	7	2	4	3	0	0	0	0
Ribosome assembly protein 1 OS=Saccharomyces cerevisiae (strain ATCC 204508 / S288c) OX=559292 GN=RIA1 PE=1 SV=1	P53893	RIA1	124 kDa		unknown	298650	488230	811290	589490	0	0	0	-1	1	1	1	1	0	0	0	0	3	3	6	4	0	0	0	0
Dolichyl-diphosphooligosaccharide--protein glycosyltransferase subunit 1 OS=Saccharomyces cerevisiae (strain ATCC 204508 / S288c) OX=559292 GN=OST1 PE=1 SV=1	P41543	OST1	54 kDa		unknown	3043400	1272600	2517400	5629900	-1	0	0	0	1	0.97	1	1	0	0	0	0	4	2	4	6	0	0	0	0
Sterol 24-C-methyltransferase OS=Saccharomyces cerevisiae (strain ATCC 204508 / S288c) OX=559292 GN=ERG6 PE=1 SV=4	P25087	ERG6	43 kDa		unknown	1707100	2208400	2512400	1586400	0	0	0	0	1	1	1	1	0	0	0	0	4	4	4	3	0	0	0	0
Mitochondrial carrier protein RIM2 OS=Saccharomyces cerevisiae (strain ATCC 204508 / S288c) OX=559292 GN=RIM2 PE=1 SV=1	P38127	RIM2	42 kDa		unknown	3127300	3318500	4737300	5667400	0	-1	-1	-1	1	1	1	1	0	0	0	0	3	3	3	7	0	0	0	0
Uncharacterized GTP-binding protein YGR210C OS=Saccharomyces cerevisiae (strain ATCC 204508 / S288c) OX=559292 GN=YGR210C PE=1 SV=1	P42942	YGR210C	45 kDa		unknown	666820	1406500	2269900	3288900	-1	0	0	0	1	1	1	1	0	0	0	0	3	4	4	5	0	0	0	0
Nucleolar complex protein 4 OS=Saccharomyces cerevisiae (strain ATCC 204508 / S288c) OX=559292 GN=NOC4 PE=1 SV=1	Q06512	NOC4	64 kDa		unknown	2396900	1796700	3411600	1685500	0	0	-1	-1	1	1	1	1	0	0	0	0	4	4	5	3	0	0	0	0
Alpha-1,2-mannosyltransferase ALG9 OS=Saccharomyces cerevisiae (strain ATCC 204508 / S288c) OX=559292 GN=ALG9 PE=1 SV=1	P53868	ALG9	64 kDa		unknown	1151100	1498700	5350000	3776600	-1	0	0	0	1	1	1	1	0	0	0	0	3	2	6	4	0	0	0	0
V-type proton ATPase subunit C OS=Saccharomyces cerevisiae (strain ATCC 204508 / S288c) OX=559292 GN=VMA5 PE=1 SV=4	P31412	VMA5	44 kDa		unknown	1222800	393260	1811500	2398200	0	-1	0	-1	1	0.97	1	1	0	0	0	0	3	2	5	6	0	0	0	0
Signal recognition particle subunit SRP54 OS=Saccharomyces cerevisiae (strain ATCC 204508 / S288c) OX=559292 GN=SRP54 PE=1 SV=2	P20424	SRP54	60 kDa		unknown	1281700	2614500	1547200	1136400	0	0	1864100	-1	1	1	1	1	0	0.13	1	0	3	4	3	2	0	0	2	0
37S ribosomal protein PET123, mitochondrial OS=Saccharomyces cerevisiae (strain ATCC 204508 / S288c) OX=559292 GN=PET123 PE=1 SV=1	P17558	PET123	36 kDa		unknown	3869600	1299600	2160000	1112700	0	3996200	-1	0	1	1	1	1	0	1	0	0	5	2	4	2	0	2	0	0
26S proteasome regulatory subunit RPN6 OS=Saccharomyces cerevisiae (strain ATCC 204508 / S288c) OX=559292 GN=RPN6 PE=1 SV=3	Q12377	RPN6	50 kDa		unknown	1982300	581240	2738500	1713200	0	993630	0	-1	1	1	1	1	0	1	0	0	4	2	4	3	0	2	0	0
Putative methyltransferase YMR310C OS=Saccharomyces cerevisiae (strain ATCC 204508 / S288c) OX=559292 GN=YMR310C PE=1 SV=1	Q04867	YMR310C	36 kDa		unknown	2428800	2915100	3484600	1359100	0	973900	-1	-1	1	1	1	1	0	1	0	0	3	4	4	2	0	2	0	0
DNA replication licensing factor MCM3 OS=Saccharomyces cerevisiae (strain ATCC 204508 / S288c) OX=559292 GN=MCM3 PE=1 SV=1	P24279	MCM3	108 kDa		unknown	1304500	859620	1770600	441530	0	1293200	0	0	1	1	1	1	0	1	0	0	4	3	5	2	0	1	0	0
54S ribosomal protein L8, mitochondrial OS=Saccharomyces cerevisiae (strain ATCC 204508 / S288c) OX=559292 GN=MRPL8 PE=1 SV=4	P22353	MRPL8	27 kDa		unknown	3852800	3897400	3503100	1005400	0	0	0	0	1	1	1	1	0	0.88	0	0	4	4	3	1	0	0	0	0
Arginine--tRNA ligase, cytoplasmic OS=Saccharomyces cerevisiae (strain ATCC 204508 / S288c) OX=559292 GN=YDR341C PE=1 SV=1	Q05506	YDR341C	70 kDa		unknown	488020	989900	906800	925050	0	0	0	-1	1	1	1	1	0.08	0	0.65	0	2	5	2	3	0	0	0	0
Protein BFR2 OS=Saccharomyces cerevisiae (strain ATCC 204508 / S288c) OX=559292 GN=BFR2 PE=1 SV=1	Q06631	BFR2	61 kDa		unknown	2375900	534610	1405200	1028300	0	0	82885000	0	1	1	1	1	0	0	0.57	0	5	2	3	3	0	0	1	0
Inositol-3-phosphate synthase OS=Saccharomyces cerevisiae (strain ATCC 204508 / S288c) OX=559292 GN=INO1 PE=1 SV=3	P11986	INO1	60 kDa		unknown	432770	2167900	2746400	352260	0	1690400	-1	0	0.91	1	1	1	0	0.34	0	0	1	5	5	2	0	1	0	0
Transcription initiation factor TFIID subunit 6 OS=Saccharomyces cerevisiae (strain ATCC 204508 / S288c) OX=559292 GN=TAF6 PE=1 SV=1	P53040	TAF6	58 kDa		unknown	725760	770780	2200200	1646900	-1	0	-1	-1	1	1	1	1	0	0.14	0	0	2	3	5	4	0	0	0	0
Homoserine dehydrogenase OS=Saccharomyces cerevisiae (strain ATCC 204508 / S288c) OX=559292 GN=HOM6 PE=1 SV=1	P31116	HOM6	39 kDa		unknown	1536100	1936400	1777800	2209900	0	0	0	0	1	1	1	1	0	0.07	0	0	3	4	3	4	0	0	0	0
TATA-binding protein-associated factor MOT1 OS=Saccharomyces cerevisiae (strain ATCC 204508 / S288c) OX=559292 GN=MOT1 PE=1 SV=1	P32333	MOT1	210 kDa		unknown	107700	105760	131090	38929	0	0	0	0	1	1	1	1	0	0	0	0	4	4	4	3	0	0	0	0
Tryptophan synthase OS=Saccharomyces cerevisiae (strain ATCC 204508 / S288c) OX=559292 GN=TRP5 PE=1 SV=1	P00931	TRP5	77 kDa		unknown	464350	862210	497010	398090	0	0	0	0	1	1	1	1	0	0	0	0	3	5	3	3	0	0	0	0
AP-3 complex subunit sigma OS=Saccharomyces cerevisiae (strain ATCC 204508 / S288c) OX=559292 GN=APS3 PE=1 SV=1	P47064	APS3	22 kDa		unknown	13027000	10747000	12855000	7350000	-1	0	-1	-1	1	1	1	1	0	0	0	0	4	4	4	2	0	0	0	0
Cluster of Ribosome biogenesis protein SSF1 OS=Saccharomyces cerevisiae (strain ATCC 204508 / S288c) OX=559292 GN=SSF1 PE=1 SV=1 (P38789)	P38789 [2]	SSF1	52 kDa	TRUE	unknown	3086700	3341800	2746800	2777500	0	0	-1	-1	1	1	1	1	0	0	0	0	3	4	4	3	0	0	0	0
Dolichyl-phosphate-mannose--protein mannosyltransferase 4 OS=Saccharomyces cerevisiae (strain ATCC 204508 / S288c) OX=559292 GN=PMT4 PE=1 SV=1	P46971	PMT4	88 kDa		unknown	236670	484630	2857000	6253100	0	-1	-1	-1	0.97	1	1	1	0	0	0	0	1	2	6	6	0	0	0	0
Prohibitin-2 OS=Saccharomyces cerevisiae (strain ATCC 204508 / S288c) OX=559292 GN=PHB2 PE=1 SV=2	P50085	PHB2	34 kDa		unknown	285160	641860	6667000	10339000	-1	-1	0	-1	0.97	1	1	1	0	0	0	0	1	2	5	7	0	0	0	0
m7GpppN-mRNA hydrolase OS=Saccharomyces cerevisiae (strain ATCC 204508 / S288c) OX=559292 GN=DCP2 PE=1 SV=1	P53550	DCP2	109 kDa		unknown	376550	816560	154070	291080	336510	1130400	922520	820230	1	1	0.98	1	0.58	1	0.88	0.94	2	4	1	2	1	1	1	1
Ribosome biogenesis protein RLP24 OS=Saccharomyces cerevisiae (strain ATCC 204508 / S288c) OX=559292 GN=RLP24 PE=1 SV=1	Q07915	RLP24	24 kDa		unknown	64899000	66243000	70709000	65800000	9688800	18216000	5269600	-1	1	1	1	1	1	0.97	0.97	0	2	3	3	2	2	1	1	0
GPN-loop GTPase 1 OS=Saccharomyces cerevisiae (strain ATCC 204508 / S288c) OX=559292 GN=NPA3 PE=1 SV=1	P47122	NPA3	43 kDa		unknown	1108500	1802900	1828100	1422900	0	6153600	3452600	952830	0.97	0.97	0.98	0.97	0	1	1	1	1	2	2	2	0	2	3	2
Transketolase 1 OS=Saccharomyces cerevisiae (strain ATCC 204508 / S288c) OX=559292 GN=TKL1 PE=1 SV=4	P23254	TKL1	74 kDa		unknown	368340	910440	1333400	2011000	-1	1015500	931690	1071600	0.97	1	1	1	0	0.97	0.97	0.97	1	2	3	5	0	1	1	1
37S ribosomal protein S9, mitochondrial OS=Saccharomyces cerevisiae (strain ATCC 204508 / S288c) OX=559292 GN=MRPS9 PE=1 SV=1	P38120	MRPS9	32 kDa		unknown	5030400	4772500	4327900	4159000	1579400	3434800	0	2335800	1	1	1	1	0.78	1	0	0.97	2	4	2	2	1	2	0	1
Probable S-adenosylmethionine-dependent methyltransferase CRG1 OS=Saccharomyces cerevisiae (strain ATCC 204508 / S288c) OX=559292 GN=CRG1 PE=1 SV=1	P38892	CRG1	34 kDa		unknown	3130500	2299800	2029000	2742600	-1	2711800	1580100	0	1	1	1	1	0	1	1	0	3	2	2	3	0	3	1	0
Sterol-4-alpha-carboxylate 3-dehydrogenase, decarboxylating OS=Saccharomyces cerevisiae (strain ATCC 204508 / S288c) OX=559292 GN=ERG26 PE=1 SV=1	P53199	ERG26	39 kDa		unknown	2032800	3397900	4224300	2271800	0	8442900	2500800	-1	1	1	1	0.97	0	1	0.95	0	2	4	2	1	0	3	1	0
ATP-dependent rRNA helicase SPB4 OS=Saccharomyces cerevisiae (strain ATCC 204508 / S288c) OX=559292 GN=SPB4 PE=1 SV=1	P25808	SPB4	69 kDa		unknown	957720	1359800	194190	793650	-1	420120	0	0	1	1	0.98	1	0	0.99	0.27	0	4	4	1	3	0	1	1	0
18S rRNA (guanine(1575)-N(7))-methyltransferase OS=Saccharomyces cerevisiae (strain ATCC 204508 / S288c) OX=559292 GN=BUD23 PE=1 SV=1	P25627	BUD23	31 kDa		unknown	8727100	8053500	8687400	1848700	-1	3104900	-1	0	1	1	1	1	0	1	0	0	3	3	4	2	0	2	0	0
tRNA pseudouridine synthase 1 OS=Saccharomyces cerevisiae (strain ATCC 204508 / S288c) OX=559292 GN=PUS1 PE=1 SV=1	Q12211	PUS1	62 kDa		unknown	225800	506950	2671000	1231500	0	0	514660	0	0.98	1	1	1	0	0	0.98	0	2	2	4	5	0	0	1	0
Ribosomal RNA-processing protein 9 OS=Saccharomyces cerevisiae (strain ATCC 204508 / S288c) OX=559292 GN=RRP9 PE=1 SV=1	Q06506	RRP9	65 kDa		unknown	2998200	661370	3091200	1666700	0	-1	-1	10098000	1	1	1	1	0	0	0	0.97	4	2	3	3	0	0	0	1
C-1-tetrahydrofolate synthase, cytoplasmic OS=Saccharomyces cerevisiae (strain ATCC 204508 / S288c) OX=559292 GN=ADE3 PE=1 SV=1	P07245	ADE3	102 kDa		unknown	688560	1065700	559090	926850	0	521090	0	0	1	1	1	1	0	0.97	0	0	3	4	2	4	0	1	0	0
U3 small nucleolar ribonucleoprotein protein IMP4 OS=Saccharomyces cerevisiae (strain ATCC 204508 / S288c) OX=559292 GN=IMP4 PE=1 SV=1	P53941	IMP4	33 kDa		unknown	4973800	4027100	6713700	3312700	-1	619770	-1	0	1	1	1	1	0	0.96	0	0	4	3	3	3	0	1	0	0
U3 small nucleolar RNA-associated protein 18 OS=Saccharomyces cerevisiae (strain ATCC 204508 / S288c) OX=559292 GN=UTP18 PE=1 SV=1	P40362	UTP18	66 kDa		unknown	5350400	1514300	5950400	1100200	0	-1	1673600	0	1	1	1	1	0	0	0.85	0	4	2	4	3	0	0	1	0
Actin-like protein ARP8 OS=Saccharomyces cerevisiae (strain ATCC 204508 / S288c) OX=559292 GN=ARP8 PE=1 SV=1	Q12386	ARP8	100 kDa		unknown	1095300	533190	130290	414430	552130	0	0	-1	1	1	0.98	1	0.37	0	0	0	6	2	1	3	1	0	0	0
Very-long-chain enoyl-CoA reductase OS=Saccharomyces cerevisiae (strain ATCC 204508 / S288c) OX=559292 GN=TSC13 PE=1 SV=1	Q99190	TSC13	37 kDa		unknown	675680	2742700	708230	3811900	0	0	-1	-1	1	1	1	1	0	0.18	0	0	2	4	2	5	0	0	0	0
U3 small nucleolar RNA-associated protein 7 OS=Saccharomyces cerevisiae (strain ATCC 204508 / S288c) OX=559292 GN=UTP7 PE=1 SV=1	P40055	UTP7	62 kDa		unknown	4259500	2426100	4390400	2459900	0	0	-1	0	1	1	1	1	0	0	0	0.06	5	3	3	2	0	0	0	0
S-adenosylmethionine permease SAM3 OS=Saccharomyces cerevisiae (strain ATCC 204508 / S288c) OX=559292 GN=SAM3 PE=1 SV=1	Q08986	SAM3	64 kDa		unknown	3957500	2795300	3724600	4944800	-1	0	0	0	1	1	1	1	0	0	0	0	4	3	3	4	0	0	0	0
Protein PET10 OS=Saccharomyces cerevisiae (strain ATCC 204508 / S288c) OX=559292 GN=PET10 PE=1 SV=3	P36139	PET10	31 kDa		unknown	1529100	4198500	2370200	2044500	0	0	-1	0	1	1	1	1	0	0	0	0	3	5	2	3	0	0	0	0
Nucleoporin NUP133 OS=Saccharomyces cerevisiae (strain ATCC 204508 / S288c) OX=559292 GN=NUP133 PE=1 SV=1	P36161	NUP133	133 kDa		unknown	212760	311060	599350	461320	0	0	-1	-1	1	1	1	1	0	0	0	0	2	3	4	4	0	0	0	0
Small COPII coat GTPase SAR1 OS=Saccharomyces cerevisiae (strain ATCC 204508 / S288c) OX=559292 GN=SAR1 PE=1 SV=1	P20606	SAR1	21 kDa		unknown	6112800	5917700	7370900	4884100	-1	-1	-1	-1	1	1	1	1	0	0	0	0	3	4	4	3	0	0	0	0
Serine/threonine-protein phosphatase 2A 56 kDa regulatory subunit delta isoform OS=Saccharomyces cerevisiae (strain ATCC 204508 / S288c) OX=559292 GN=RTS1 PE=1 SV=2	P38903	RTS1	85 kDa		unknown	923260	1183600	1202600	1363300	-1	0	0	0	1	1	1	1	0	0	0	0	3	4	3	4	0	0	0	0
DNA-directed RNA polymerases I and III subunit RPAC2 OS=Saccharomyces cerevisiae (strain ATCC 204508 / S288c) OX=559292 GN=RPC19 PE=1 SV=1	P28000	RPC19	16 kDa		unknown	4751400	7081100	3860800	6384200	0	-1	-1	0	1	1	1	1	0	0	0	0	3	4	4	3	0	0	0	0
Multiple RNA-binding domain-containing protein 1 OS=Saccharomyces cerevisiae (strain ATCC 204508 / S288c) OX=559292 GN=MRD1 PE=1 SV=1	Q06106	MRD1	101 kDa		unknown	193510	215650	314940	288670	-1	0	0	0	1	1	1	1	0	0	0	0	4	4	3	3	0	0	0	0
Mitochondrial import inner membrane translocase subunit TIM23 OS=Saccharomyces cerevisiae (strain ATCC 204508 / S288c) OX=559292 GN=TIM23 PE=1 SV=1	P32897	TIM23	23 kDa		unknown	4347200	8515700	7698200	6945700	0	0	0	-1	1	1	1	1	0	0	0	0	2	6	2	4	0	0	0	0
Non-histone chromosomal protein 6B OS=Saccharomyces cerevisiae (strain ATCC 204508 / S288c) OX=559292 GN=NHP6B PE=1 SV=3	P11633	NHP6B	11 kDa		unknown	4279000	4893900	5501600	3555100	0	-1	-1	-1	1	1	1	1	0	0	0	0	4	4	3	3	0	0	0	0
Nuclear protein STH1/NPS1 OS=Saccharomyces cerevisiae (strain ATCC 204508 / S288c) OX=559292 GN=STH1 PE=1 SV=1	P32597	STH1	157 kDa		unknown	309500	182850	516040	225410	0	0	0	-1	1	1	1	1	0	0	0	0	4	3	4	2	0	0	0	0
ATP-dependent RNA helicase DBP7 OS=Saccharomyces cerevisiae (strain ATCC 204508 / S288c) OX=559292 GN=DBP7 PE=1 SV=1	P36120	DBP7	83 kDa		unknown	227030	768100	773460	779560	0	0	-1	0	0.97	1	1	1	0	0	0	0	1	5	3	5	0	0	0	0
NADPH--cytochrome P450 reductase OS=Saccharomyces cerevisiae (strain ATCC 204508 / S288c) OX=559292 GN=NCP1 PE=1 SV=3	P16603	NCP1	77 kDa		unknown	674710	850980	599700	231910	0	-1	0	0	1	1	1	0.97	0	0	0	0	5	4	2	1	0	0	0	0
Ribosome assembly protein 4 OS=Saccharomyces cerevisiae (strain ATCC 204508 / S288c) OX=559292 GN=RSA4 PE=1 SV=3	P25382	RSA4	57 kDa		unknown	703790	2629200	736850	1756200	620960	2001200	841820	2377000	0.97	1	1	1	0.97	0.97	0.97	0.97	1	4	1	2	1	1	1	1
Enhancer of mRNA-decapping protein 3 OS=Saccharomyces cerevisiae (strain ATCC 204508 / S288c) OX=559292 GN=EDC3 PE=1 SV=1	P39998	EDC3	61 kDa		unknown	1737300	668560	915590	942960	717000	1928200	5004100	0	1	0.97	0.98	1	0.97	1	1	0	3	1	1	2	1	1	3	0
Cluster of Pyruvate carboxylase 1 OS=Saccharomyces cerevisiae (strain ATCC 204508 / S288c) OX=559292 GN=PYC1 PE=1 SV=2 (P11154)	P11154 [2]	PYC1	130 kDa	TRUE	unknown	0	0	0	858140	0	0	0	0	1	1	1	1	0	0.98	0.94	0	2	2	3	4	0	1	1	0
Probable family 17 glucosidase SCW4 OS=Saccharomyces cerevisiae (strain ATCC 204508 / S288c) OX=559292 GN=SCW4 PE=1 SV=1	P53334	SCW4	40 kDa		unknown	3592200	2011300	1759700	3419900	-1	1078300	622350	-1	1	1	0.98	1	0	0.41	0.97	0	4	1	1	3	0	1	1	0
Trafficking protein particle complex subunit 31 OS=Saccharomyces cerevisiae (strain ATCC 204508 / S288c) OX=559292 GN=TRS31 PE=1 SV=1	Q03337	TRS31	32 kDa		unknown	1745500	1748100	764090	1636400	0	1241700	0	-1	1	1	1	1	0	0.88	0.23	0	3	3	2	3	0	1	0	0
Dolichyl-diphosphooligosaccharide--protein glycosyltransferase subunit STT3 OS=Saccharomyces cerevisiae (strain ATCC 204508 / S288c) OX=559292 GN=STT3 PE=1 SV=2	P39007	STT3	82 kDa		unknown	1078300	1104600	1896000	3040200	-1	0	0	1545300	1	1	1	1	0	0	0.18	0.9	2	3	2	4	0	0	0	1
Probable vacuolar amino acid transporter YPQ1 OS=Saccharomyces cerevisiae (strain ATCC 204508 / S288c) OX=559292 GN=YPQ1 PE=1 SV=1	Q12010	YPQ1	35 kDa		unknown	3740600	10352000	4775500	11166000	-1	11170000	-1	-1	1	1	1	1	0	1	0	0	2	3	2	4	0	2	0	0
Adenylate kinase isoenzyme 6 homolog FAP7 OS=Saccharomyces cerevisiae (strain ATCC 204508 / S288c) OX=559292 GN=FAP7 PE=1 SV=1	Q12055	FAP7	23 kDa		unknown	2081900	3749100	3364500	2788000	0	0	1363000	-1	1	1	1	1	0	0	0.48	0	2	4	3	3	0	0	1	0
Putative ATP-dependent RNA helicase YLR419W OS=Saccharomyces cerevisiae (strain ATCC 204508 / S288c) OX=559292 GN=YLR419W PE=1 SV=1	Q06698	YLR419W	163 kDa		unknown	400480	301970	577410	228970	0	0	0	0	1	1	1	1	0.09	0	0.11	0.12	3	2	4	2	0	0	0	0
Proteasome subunit beta type-3 OS=Saccharomyces cerevisiae (strain ATCC 204508 / S288c) OX=559292 GN=PUP3 PE=1 SV=1	P25451	PUP3	23 kDa		unknown	10482000	6894900	10344000	0	2593900	9758000	0	-1	1	1	1	0	0.81	0.53	0	0	4	4	3	0	1	1	0	0
26S proteasome regulatory subunit RPN9 OS=Saccharomyces cerevisiae (strain ATCC 204508 / S288c) OX=559292 GN=RPN9 PE=1 SV=1	Q04062	RPN9	46 kDa		unknown	579030	843680	3711100	2561200	0	-1	859250	-1	0.95	1	1	1	0	0	0.21	0	1	2	5	4	0	0	1	0
Cell division control protein 10 OS=Saccharomyces cerevisiae (strain ATCC 204508 / S288c) OX=559292 GN=CDC10 PE=1 SV=1	P25342	CDC10	37 kDa		unknown	1563900	1840200	2155300	978260	0	0	0	-1	1	1	1	1	0	0	0	0	4	3	3	3	0	0	0	0
37S ribosomal protein RSM28, mitochondrial OS=Saccharomyces cerevisiae (strain ATCC 204508 / S288c) OX=559292 GN=RSM28 PE=1 SV=2	Q03430	RSM28	41 kDa		unknown	3654800	2041700	2237300	3096000	0	0	0	-1	1	1	1	1	0	0	0	0	4	3	3	3	0	0	0	0
Transcriptional modulator WTM1 OS=Saccharomyces cerevisiae (strain ATCC 204508 / S288c) OX=559292 GN=WTM1 PE=1 SV=1	Q12363	WTM1	48 kDa		unknown	513740	1102100	876570	1385600	-1	0	-1	-1	1	1	1	1	0	0	0	0	3	3	3	4	0	0	0	0
Acetyl-CoA acetyltransferase OS=Saccharomyces cerevisiae (strain ATCC 204508 / S288c) OX=559292 GN=ERG10 PE=1 SV=3	P41338	ERG10	42 kDa		unknown	1309700	2022800	2280000	1907600	0	0	-1	0	1	1	1	1	0	0	0	0	3	3	3	4	0	0	0	0
Mitochondrial homologous recombination protein 1 OS=Saccharomyces cerevisiae (strain ATCC 204508 / S288c) OX=559292 GN=MHR1 PE=1 SV=1	Q06630	MHR1	27 kDa		unknown	2604700	3782500	3331900	4538100	-1	0	-1	-1	1	1	1	1	0	0	0	0	2	3	3	4	0	0	0	0
Sphingosine-1-phosphate lyase OS=Saccharomyces cerevisiae (strain ATCC 204508 / S288c) OX=559292 GN=DPL1 PE=1 SV=1	Q05567	DPL1	66 kDa		unknown	309790	87827	591490	327250	-1	0	0	0	1	1	1	1	0	0	0	0	2	3	5	3	0	0	0	0
Mitochondrial 2-oxodicarboxylate carrier 2 OS=Saccharomyces cerevisiae (strain ATCC 204508 / S288c) OX=559292 GN=ODC2 PE=1 SV=1	Q99297	ODC2	34 kDa		unknown	911400	2721000	2432300	3203600	-1	0	-1	-1	1	1	1	1	0	0	0	0	2	5	2	4	0	0	0	0
Hexokinase-2 OS=Saccharomyces cerevisiae (strain ATCC 204508 / S288c) OX=559292 GN=HXK2 PE=1 SV=4	P04807	HXK2	54 kDa		unknown	1191100	1086700	956030	1629400	0	0	0	0	1	1	1	1	0	0	0	0	4	3	2	4	0	0	0	0
U3 small nucleolar RNA-associated protein 5 OS=Saccharomyces cerevisiae (strain ATCC 204508 / S288c) OX=559292 GN=UTP5 PE=1 SV=1	Q04177	UTP5	72 kDa		unknown	1510300	2066800	4742200	2429400	-1	-1	-1	-1	1	1	1	1	0	0	0	0	3	4	4	2	0	0	0	0
Dolichyl-phosphate-mannose--protein mannosyltransferase 2 OS=Saccharomyces cerevisiae (strain ATCC 204508 / S288c) OX=559292 GN=PMT2 PE=1 SV=2	P31382	PMT2	87 kDa		unknown	259850	505840	2307400	2780300	0	0	-1	-1	0.97	1	1	1	0	0	0	0	1	3	4	5	0	0	0	0
Chromatin structure-remodeling complex subunit RSC9 OS=Saccharomyces cerevisiae (strain ATCC 204508 / S288c) OX=559292 GN=RSC9 PE=1 SV=1	Q03124	RSC9	65 kDa		unknown	946080	463510	203780	1140500	0	0	0	-1	1	1	0.98	1	0	0	0	0	6	2	1	4	0	0	0	0
Cytochrome b-c1 complex subunit 7, mitochondrial OS=Saccharomyces cerevisiae (strain ATCC 204508 / S288c) OX=559292 GN=QCR7 PE=1 SV=2	P00128	QCR7	15 kDa		unknown	764670	515020	6748900	20412000	-1	-1	0	-1	0.97	0.97	1	1	0	0	0	0	1	1	5	6	0	0	0	0
Nuclear and cytoplasmic polyadenylated RNA-binding protein PUB1 OS=Saccharomyces cerevisiae (strain ATCC 204508 / S288c) OX=559292 GN=PUB1 PE=1 SV=4	P32588	PUB1	51 kDa		unknown	486150	1883900	4772100	1939100	1408700	3084500	6574600	7473300	0.97	1	1	1	0.97	0.97	1	0.97	1	2	2	2	1	1	2	1
NAD-dependent protein deacetylase HST2 OS=Saccharomyces cerevisiae (strain ATCC 204508 / S288c) OX=559292 GN=HST2 PE=1 SV=1	P53686	HST2	40 kDa		unknown	616400	510670	880020	936730	0	844090	1350000	0	1	1	0.99	1	0	0.97	1	0	2	2	2	3	0	1	1	0
DNA damage response protein kinase DUN1 OS=Saccharomyces cerevisiae (strain ATCC 204508 / S288c) OX=559292 GN=DUN1 PE=1 SV=1	P39009	DUN1	59 kDa		unknown	59423	470600	44454	208100	0	521900	107850	0	0.97	1	1	1	0	0.97	0.98	0	1	4	2	3	0	1	1	0
N-terminal acetyltransferase A complex catalytic subunit ARD1 OS=Saccharomyces cerevisiae (strain ATCC 204508 / S288c) OX=559292 GN=ARD1 PE=1 SV=2	P07347	ARD1	28 kDa		unknown	2479800	5591300	2854300	2945700	-1	2454300	0	-1	1	1	1	1	0	1	0	0	2	4	2	2	0	2	0	0
Ribosomal protein VAR1, mitochondrial OS=Saccharomyces cerevisiae (strain ATCC 204508 / S288c) OX=559292 GN=VAR1 PE=1 SV=3	P02381	VAR1	47 kDa		unknown	1606100	1391300	1888900	866950	-1	0	0	-1	1	1	1	1	0	0.99	0	0	2	2	4	2	0	1	0	0
37S ribosomal protein S28, mitochondrial OS=Saccharomyces cerevisiae (strain ATCC 204508 / S288c) OX=559292 GN=MRPS28 PE=1 SV=1	P21771	MRPS28	33 kDa		unknown	4101200	3246700	1140300	3408600	-1	2543700	-1	0	1	1	0.98	1	0	1	0	0	3	3	1	3	0	2	0	0
Aconitate hydratase, mitochondrial OS=Saccharomyces cerevisiae (strain ATCC 204508 / S288c) OX=559292 GN=ACO1 PE=1 SV=2	P19414	ACO1	85 kDa		unknown	0	842030	825010	820150	1667600	0	0	0	0	1	1	1	0.97	0.97	0	0	0	4	3	3	1	1	0	0
Phenylalanine--tRNA ligase alpha subunit OS=Saccharomyces cerevisiae (strain ATCC 204508 / S288c) OX=559292 GN=FRS2 PE=1 SV=3	P15625	FRS2	58 kDa		unknown	990000	1632600	494710	699200	0	1051800	-1	0	1	1	0.98	1	0	1	0	0	2	4	1	3	0	2	0	0
Asparagine synthetase [glutamine-hydrolyzing] 2 OS=Saccharomyces cerevisiae (strain ATCC 204508 / S288c) OX=559292 GN=ASN2 PE=1 SV=2	P49090	ASN2	65 kDa		unknown	371770	778380	718250	688350	-1	1915300	0	-1	0.97	1	1	1	0	1	0	0	1	3	3	3	0	2	0	0
Actin-related protein 2/3 complex subunit 2 OS=Saccharomyces cerevisiae (strain ATCC 204508 / S288c) OX=559292 GN=ARC35 PE=1 SV=1	P53731	ARC35	40 kDa		unknown	1340900	1174000	1637300	773030	0	1646700	-1	-1	1	1	1	1	0	0.64	0	0	2	3	3	3	0	1	0	0
DNA-directed RNA polymerase II subunit RPB3 OS=Saccharomyces cerevisiae (strain ATCC 204508 / S288c) OX=559292 GN=RPB3 PE=1 SV=2	P16370	RPB3	35 kDa		unknown	1366200	1162000	1128200	888930	-1	1336300	0	-1	1	1	0.98	1	0	0.57	0	0	4	3	2	2	0	1	0	0
Exocyst complex component SEC10 OS=Saccharomyces cerevisiae (strain ATCC 204508 / S288c) OX=559292 GN=SEC10 PE=1 SV=1	Q06245	SEC10	100 kDa		unknown	462270	345190	425530	187500	0	0	0	0	1	1	1	1	0.14	0	0	0.13	3	2	2	3	0	0	0	0
54S ribosomal protein L15, mitochondrial OS=Saccharomyces cerevisiae (strain ATCC 204508 / S288c) OX=559292 GN=MRPL15 PE=1 SV=3	P36523	MRPL15	28 kDa		unknown	2150200	4506700	4343100	3701300	-1	0	-1	-1	1	1	1	1	0	0.11	0	0	2	3	3	2	0	0	0	0
V-type proton ATPase subunit H OS=Saccharomyces cerevisiae (strain ATCC 204508 / S288c) OX=559292 GN=VMA13 PE=1 SV=1	P41807	VMA13	54 kDa		unknown	362280	145590	1138400	1780300	0	0	-1	0	1	0.97	1	1	0	0.12	0	0	2	1	4	5	0	0	0	0
Ribosome quality control complex subunit 1 OS=Saccharomyces cerevisiae (strain ATCC 204508 / S288c) OX=559292 GN=RQC1 PE=1 SV=1	Q05468	RQC1	83 kDa		unknown	1060400	545630	279760	628990	0	0	-1	0	1	1	1	1	0	0	0	0.06	4	3	2	3	0	0	0	0
Squalene synthase OS=Saccharomyces cerevisiae (strain ATCC 204508 / S288c) OX=559292 GN=ERG9 PE=1 SV=2	P29704	ERG9	52 kDa		unknown	2604700	928840	2596000	2023800	0	0	0	0	1	1	1	1	0	0	0	0	3	2	4	3	0	0	0	0
DNA-directed RNA polymerase I subunit RPA49 OS=Saccharomyces cerevisiae (strain ATCC 204508 / S288c) OX=559292 GN=RPA49 PE=1 SV=2	Q01080	RPA49	47 kDa		unknown	387140	435010	2490100	971050	0	0	0	0	1	1	1	1	0	0	0	0	2	3	5	2	0	0	0	0
Proteasome subunit alpha type-2 OS=Saccharomyces cerevisiae (strain ATCC 204508 / S288c) OX=559292 GN=PRE8 PE=1 SV=1	P23639	PRE8	27 kDa		unknown	4777600	5740700	7304400	5759600	0	0	-1	-1	1	1	1	1	0	0	0	0	2	3	4	3	0	0	0	0
GTP-binding protein YPT1 OS=Saccharomyces cerevisiae (strain ATCC 204508 / S288c) OX=559292 GN=YPT1 PE=1 SV=2	P01123	YPT1	23 kDa		unknown	3724800	3745500	4437800	3580500	-1	-1	0	0	1	1	1	1	0	0	0	0	3	3	3	3	0	0	0	0
Eukaryotic translation initiation factor 4E OS=Saccharomyces cerevisiae (strain ATCC 204508 / S288c) OX=559292 GN=CDC33 PE=1 SV=1	P07260	CDC33	24 kDa		unknown	3365200	5050300	7180100	3383100	0	-1	-1	-1	1	1	1	1	0	0	0	0	2	4	4	2	0	0	0	0
Beta-glucan synthesis-associated protein KRE6 OS=Saccharomyces cerevisiae (strain ATCC 204508 / S288c) OX=559292 GN=KRE6 PE=1 SV=2	P32486	KRE6	80 kDa		unknown	356890	968740	595000	1162000	-1	0	-1	-1	1	1	1	1	0	0	0	0	2	4	2	4	0	0	0	0
ATP synthase subunit 4, mitochondrial OS=Saccharomyces cerevisiae (strain ATCC 204508 / S288c) OX=559292 GN=ATP4 PE=1 SV=2	P05626	ATP4	27 kDa		unknown	2937700	3568900	5216700	8909800	0	0	-1	0	1	1	1	1	0	0	0	0	2	3	4	3	0	0	0	0
Ino eighty subunit 1 OS=Saccharomyces cerevisiae (strain ATCC 204508 / S288c) OX=559292 GN=IES1 PE=1 SV=1	P43579	IES1	79 kDa		unknown	688840	291470	335690	451320	-1	-1	-1	-1	1	1	1	1	0	0	0	0	4	2	2	2	0	0	0	0
rRNA-processing protein EFG1 OS=Saccharomyces cerevisiae (strain ATCC 204508 / S288c) OX=559292 GN=EFG1 PE=1 SV=2	Q3E705	EFG1	27 kDa		unknown	3854200	5335100	4465900	3788100	0	0	0	0	1	1	1	1	0	0	0	0	3	4	3	2	0	0	0	0
Ribosomal RNA-processing protein 14 OS=Saccharomyces cerevisiae (strain ATCC 204508 / S288c) OX=559292 GN=RRP14 PE=1 SV=1	P36080	RRP14	50 kDa		unknown	1389900	1029400	1206800	730070	0	0	0	-1	1	1	0.98	1	0	0	0	0	4	3	2	3	0	0	0	0
Alpha-1,2 mannosyltransferase KTR1 OS=Saccharomyces cerevisiae (strain ATCC 204508 / S288c) OX=559292 GN=KTR1 PE=1 SV=1	P27810	KTR1	46 kDa		unknown	185260	135980	2140800	4449000	-1	0	-1	0	1	0.97	1	1	0	0	0	0	2	1	4	5	0	0	0	0
26S proteasome regulatory subunit RPN12 OS=Saccharomyces cerevisiae (strain ATCC 204508 / S288c) OX=559292 GN=RPN12 PE=1 SV=3	P32496	RPN12	32 kDa		unknown	818150	222760	2557300	1417000	-1	-1	-1	0	1	0.97	1	1	0	0	0	0	2	1	6	3	0	0	0	0
54S ribosomal protein L10, mitochondrial OS=Saccharomyces cerevisiae (strain ATCC 204508 / S288c) OX=559292 GN=MRPL10 PE=1 SV=2	P36520	MRPL10	36 kDa		unknown	4450400	1543700	1085500	3613000	-1	-1	-1	-1	1	1	0.92	1	0	0	0	0	5	2	1	4	0	0	0	0
Nucleolar complex protein 14 OS=Saccharomyces cerevisiae (strain ATCC 204508 / S288c) OX=559292 GN=NOP14 PE=1 SV=1	Q99207	NOP14	94 kDa		unknown	1438000	0	501020	162540	0	0	0	0	1	0.18	1	0.97	0	0	0	0	7	0	4	1	0	0	0	0
ER membrane protein complex subunit 1 OS=Saccharomyces cerevisiae (strain ATCC 204508 / S288c) OX=559292 GN=EMC1 PE=1 SV=1	P25574	EMC1	87 kDa		unknown	0	0	242900	3218000	14936000	7153800	0	0	0	0	1	1	0.39	0.21	0	0	0	0	2	8	1	1	0	0
Aromatic amino acid aminotransferase 2 OS=Saccharomyces cerevisiae (strain ATCC 204508 / S288c) OX=559292 GN=ARO9 PE=1 SV=3	P38840	ARO9	59 kDa		unknown	98624	592220	748070	569810	0	1647500	1367500	681500	0.97	0.97	1	1	0	1	1	0.77	1	1	2	2	0	2	2	1
Sterol O-acyltransferase 2 OS=Saccharomyces cerevisiae (strain ATCC 204508 / S288c) OX=559292 GN=ARE2 PE=1 SV=1	P53629	ARE2	74 kDa		unknown	797210	1291500	1777500	314270	0	1119400	1367000	0	0.97	1	1	1	0.34	0.97	0.97	0.09	1	2	2	2	1	1	1	0
AP-2 complex subunit mu OS=Saccharomyces cerevisiae (strain ATCC 204508 / S288c) OX=559292 GN=APM4 PE=1 SV=1	Q99186	APM4	55 kDa		unknown	947690	563920	146000	579610	0	991400	0	1096200	1	1	0.98	1	0	0.97	0.17	0.97	3	2	1	2	0	1	0	1
OTU domain-containing protein 2 OS=Saccharomyces cerevisiae (strain ATCC 204508 / S288c) OX=559292 GN=OTU2 PE=1 SV=1	P38747	OTU2	36 kDa		unknown	1693800	1339800	544670	1983000	0	1718000	2234600	0	1	1	0.98	1	0	0.97	0.97	0	3	2	1	3	0	1	1	0
26S proteasome regulatory subunit RPN7 OS=Saccharomyces cerevisiae (strain ATCC 204508 / S288c) OX=559292 GN=RPN7 PE=1 SV=3	Q06103	RPN7	49 kDa		unknown	1237600	1394600	845740	1027700	0	0	0	0	1	1	1	1	0	0.24	0	0	3	3	2	2	0	0	0	0
Poly(A) ribonuclease POP2 OS=Saccharomyces cerevisiae (strain ATCC 204508 / S288c) OX=559292 GN=POP2 PE=1 SV=2	P39008	POP2	50 kDa		unknown	3481100	3600100	954970	2481300	-1	0	0	-1	1	1	0.98	1	0	0.1	0	0	3	4	1	2	0	0	0	0
Mitochondrial glycine transporter YMC1 OS=Saccharomyces cerevisiae (strain ATCC 204508 / S288c) OX=559292 GN=YMC1 PE=1 SV=2	P32331	YMC1	33 kDa		unknown	3333600	3818400	3323400	2364400	0	0	-1	0	1	1	1	1	0	0	0	0	3	3	3	2	0	0	0	0
DNA mismatch repair protein MSH6 OS=Saccharomyces cerevisiae (strain ATCC 204508 / S288c) OX=559292 GN=MSH6 PE=1 SV=1	Q03834	MSH6	140 kDa		unknown	346130	191020	196470	164930	0	0	0	0	1	1	1	1	0	0	0	0	3	3	2	2	0	0	0	0
Probable mannosyltransferase KTR3 OS=Saccharomyces cerevisiae (strain ATCC 204508 / S288c) OX=559292 GN=KTR3 PE=1 SV=1	P38130	KTR3	47 kDa		unknown	421640	218710	2942400	1549600	0	0	0	0	1	0.98	1	1	0	0	0	0	3	1	4	3	0	0	0	0
DNA-directed RNA polymerase, mitochondrial OS=Saccharomyces cerevisiae (strain ATCC 204508 / S288c) OX=559292 GN=RPO41 PE=1 SV=2	P13433	RPO41	153 kDa		unknown	240280	204860	193220	209240	0	0	0	0	1	1	1	1	0	0	0	0	4	2	2	2	0	0	0	0
Ubiquitin carboxyl-terminal hydrolase 3 OS=Saccharomyces cerevisiae (strain ATCC 204508 / S288c) OX=559292 GN=UBP3 PE=1 SV=1	Q01477	UBP3	102 kDa		unknown	523470	343260	339310	300660	0	0	0	0	1	1	1	1	0	0	0	0	3	3	2	3	0	0	0	0
Low-affinity glucose transporter HXT4 OS=Saccharomyces cerevisiae (strain ATCC 204508 / S288c) OX=559292 GN=HXT4 PE=1 SV=1	P32467	HXT4	64 kDa	TRUE	unknown	534880	1370800	1456500	3477500	0	0	0	0	0.98	1	1	1	0	0	0	0	1	2	2	3	0	0	0	0
RNA polymerase II degradation factor 1 OS=Saccharomyces cerevisiae (strain ATCC 204508 / S288c) OX=559292 GN=DEF1 PE=1 SV=1	P35732	DEF1	84 kDa		unknown	2215700	4560600	2217300	1752200	-1	0	-1	-1	1	1	1	0.97	0	0	0	0	3	4	3	1	0	0	0	0
Carrier protein YMC2, mitochondrial OS=Saccharomyces cerevisiae (strain ATCC 204508 / S288c) OX=559292 GN=YMC2 PE=1 SV=1	P38087	YMC2	37 kDa		unknown	996590	1105800	1803800	1916700	-1	0	-1	-1	1	1	1	1	0	0	0	0	2	3	3	3	0	0	0	0
Mitochondrial import receptor subunit TOM20 OS=Saccharomyces cerevisiae (strain ATCC 204508 / S288c) OX=559292 GN=TOM20 PE=1 SV=1	P35180	TOM20	20 kDa		unknown	4840900	3914500	5155700	3935000	0	-1	-1	0	1	1	1	1	0	0	0	0	3	3	3	2	0	0	0	0
Uncharacterized protein YHR127W OS=Saccharomyces cerevisiae (strain ATCC 204508 / S288c) OX=559292 GN=YHR127W PE=1 SV=1	P38833	YHR127W	27 kDa		unknown	1773000	1740800	1957300	175890	0	0	-1	0	1	1	1	1	0	0	0	0	3	3	3	2	0	0	0	0
Myosin light chain 1 OS=Saccharomyces cerevisiae (strain ATCC 204508 / S288c) OX=559292 GN=MLC1 PE=1 SV=1	P53141	MLC1	16 kDa		unknown	1767700	1248300	2247700	1600300	0	0	-1	-1	1	1	1	1	0	0	0	0	3	2	3	3	0	0	0	0
Nucleoporin NIC96 OS=Saccharomyces cerevisiae (strain ATCC 204508 / S288c) OX=559292 GN=NIC96 PE=1 SV=2	P34077	NIC96	96 kDa		unknown	285310	122740	945570	431740	0	0	0	-1	1	1	1	1	0	0	0	0	2	2	5	2	0	0	0	0
V-type proton ATPase subunit F OS=Saccharomyces cerevisiae (strain ATCC 204508 / S288c) OX=559292 GN=VMA7 PE=1 SV=1	P39111	VMA7	13 kDa		unknown	6787300	168810	2191900	1581000	-1	-1	-1	0	1	1	1	1	0	0	0	0	4	1	3	2	0	0	0	0
D-2-hydroxyglutarate--pyruvate transhydrogenase DLD3 OS=Saccharomyces cerevisiae (strain ATCC 204508 / S288c) OX=559292 GN=DLD3 PE=1 SV=1	P39976	DLD3	55 kDa		unknown	466400	728200	9909700	8434000	-1	0	0	0	0.97	1	1	1	0	0	0	0	1	2	4	4	0	0	0	0
Ribosome biogenesis protein ENP2 OS=Saccharomyces cerevisiae (strain ATCC 204508 / S288c) OX=559292 GN=ENP2 PE=1 SV=2	P48234	ENP2	82 kDa		unknown	1454700	273460	1720700	1507900	0	-1	-1	-1	1	0.97	1	1	0	0	0	0	3	1	4	3	0	0	0	0
V-type proton ATPase subunit E OS=Saccharomyces cerevisiae (strain ATCC 204508 / S288c) OX=559292 GN=VMA4 PE=1 SV=4	P22203	VMA4	26 kDa		unknown	1491900	550720	5077400	4975700	-1	0	-1	0	1	0.97	1	1	0	0	0	0	3	1	4	3	0	0	0	0
Nuclear segregation protein BFR1 OS=Saccharomyces cerevisiae (strain ATCC 204508 / S288c) OX=559292 GN=BFR1 PE=1 SV=1	P38934	BFR1	55 kDa		unknown	399330	472070	1498000	463950	0	-1	-1	0	0.97	1	1	1	0	0	0	0	1	3	5	2	0	0	0	0
General negative regulator of transcription subunit 5 OS=Saccharomyces cerevisiae (strain ATCC 204508 / S288c) OX=559292 GN=NOT5 PE=1 SV=1	Q12514	NOT5	66 kDa		unknown	609060	1860100	1190200	170300	0	0	-1	-1	1	1	1	0.97	0	0	0	0	3	4	3	1	0	0	0	0
tRNA dimethylallyltransferase OS=Saccharomyces cerevisiae (strain ATCC 204508 / S288c) OX=559292 GN=MOD5 PE=1 SV=2	P07884	MOD5	50 kDa		unknown	0	1022700	851800	571200	-1	0	451140	0	0	1	1	1	0	0	0.88	0	0	4	3	2	0	0	1	0
Replication factor C subunit 3 OS=Saccharomyces cerevisiae (strain ATCC 204508 / S288c) OX=559292 GN=RFC3 PE=1 SV=1	P38629	RFC3	38 kDa		unknown	2100300	2136800	811640	526520	-1	0	-1	0	1	1	0.86	0.97	0	0	0	0	4	5	1	1	0	0	0	0
D-lactate dehydrogenase [cytochrome] 1, mitochondrial OS=Saccharomyces cerevisiae (strain ATCC 204508 / S288c) OX=559292 GN=DLD1 PE=1 SV=2	P32891	DLD1	65 kDa		unknown	0	0	246680	1211800	0	0	0	0	0.12	0	1	1	0	0	0	0	0	0	3	5	0	0	0	0
Myo-inositol transporter 1 OS=Saccharomyces cerevisiae (strain ATCC 204508 / S288c) OX=559292 GN=ITR1 PE=1 SV=2	P30605	ITR1	64 kDa		unknown	252730	827830	1595800	726570	-1	815680	588660	954300	0.97	1	1	1	0	0.96	0.97	0.82	1	2	2	2	0	1	1	1
Hsp90 co-chaperone HCH1 OS=Saccharomyces cerevisiae (strain ATCC 204508 / S288c) OX=559292 GN=HCH1 PE=1 SV=1	P53834	HCH1	17 kDa		unknown	1655700	4333500	4822300	2430300	-1	2634100	8258900	0	0.97	1	1	0.97	0	0.97	0.57	0	1	3	3	1	0	1	1	0
54S ribosomal protein L11, mitochondrial OS=Saccharomyces cerevisiae (strain ATCC 204508 / S288c) OX=559292 GN=MRPL11 PE=1 SV=2	P36521	MRPL11	29 kDa		unknown	1049500	1542600	1454900	2029000	-1	783800	0	0	1	1	1	1	0	0.97	0	0	2	2	2	3	0	1	0	0
Cluster of Ras-related protein SEC4 OS=Saccharomyces cerevisiae (strain ATCC 204508 / S288c) OX=559292 GN=SEC4 PE=1 SV=1 (P07560)	P07560 [2]	SEC4	24 kDa	TRUE	unknown	1565900	1680400	4800600	1912100	-1	0	0	0	1	1	1	1	0	0	0	0.9	2	2	3	2	0	0	0	1
Sulfate adenylyltransferase OS=Saccharomyces cerevisiae (strain ATCC 204508 / S288c) OX=559292 GN=MET3 PE=1 SV=2	P08536	MET3	58 kDa		unknown	1726200	1334800	295990	0	-1	1005800	0	1276300	1	1	0.98	0	0	1	0	0.9	3	3	1	0	0	2	0	1
Iron transport multicopper oxidase FET3 OS=Saccharomyces cerevisiae (strain ATCC 204508 / S288c) OX=559292 GN=FET3 PE=1 SV=2	P38993	FET3	72 kDa		unknown	3465000	1838400	4065800	5084100	0	0	-1	1565400	1	1	1	1	0.05	0.59	0	0.24	2	2	2	2	0	0	0	1
V0 assembly protein 1 OS=Saccharomyces cerevisiae (strain ATCC 204508 / S288c) OX=559292 GN=VOA1 PE=1 SV=1	P53262	VOA1	30 kDa		unknown	5144800	826330	4510500	9921200	0	7353100	-1	-1	1	0.97	1	1	0	0.64	0	0	3	1	2	3	0	1	0	0
Target of rapamycin complex subunit LST8 OS=Saccharomyces cerevisiae (strain ATCC 204508 / S288c) OX=559292 GN=LST8 PE=1 SV=1	P41318	LST8	34 kDa		unknown	1231800	777060	1235100	935160	0	584810	0	0	1	1	1	1	0	0.34	0.18	0	2	2	2	2	0	1	0	0
Cluster of Ribonucleoside-diphosphate reductase large chain 1 OS=Saccharomyces cerevisiae (strain ATCC 204508 / S288c) OX=559292 GN=RNR1 PE=1 SV=2 (P21524)	P21524 [2]	RNR1	100 kDa	TRUE	unknown	0	0	467590	0	0	1285500	0	0	0.97	0.97	1	0	0	1	0	0.57	1	1	3	0	0	3	0	1
DNA repair and recombination protein RDH54 OS=Saccharomyces cerevisiae (strain ATCC 204508 / S288c) OX=559292 GN=RDH54 PE=1 SV=4	P38086	RDH54	108 kDa		unknown	103980	101430	163450	81421	0	0	0	0	1	1	1	1	0	0	0	0.38	2	2	3	2	0	0	0	0
26S proteasome regulatory subunit RPN13 OS=Saccharomyces cerevisiae (strain ATCC 204508 / S288c) OX=559292 GN=RPN13 PE=1 SV=1	O13563	RPN13	18 kDa		unknown	1883800	2728500	4790800	3168200	-1	-1	0	-1	0.97	1	1	1	0	0	0.14	0	1	2	3	3	0	0	0	0
Protein disulfide-isomerase OS=Saccharomyces cerevisiae (strain ATCC 204508 / S288c) OX=559292 GN=PDI1 PE=1 SV=2	P17967	PDI1	58 kDa		unknown	1272400	769860	1894300	261060	-1	0	-1	-1	1	1	1	1	0	0	0	0	3	2	3	2	0	0	0	0
Delta(24(24(1)))-sterol reductase OS=Saccharomyces cerevisiae (strain ATCC 204508 / S288c) OX=559292 GN=ERG4 PE=1 SV=2	P25340	ERG4	56 kDa		unknown	1058700	1005100	2540500	1967800	0	0	0	0	1	1	1	1	0	0	0	0	2	2	4	2	0	0	0	0
Elongation factor 1-beta OS=Saccharomyces cerevisiae (strain ATCC 204508 / S288c) OX=559292 GN=EFB1 PE=1 SV=4	P32471	EFB1	23 kDa		unknown	7238800	5957400	8972600	6364200	-1	-1	0	-1	1	1	1	1	0	0	0	0	3	2	3	2	0	0	0	0
Protoplast secreted protein 2 OS=Saccharomyces cerevisiae (strain ATCC 204508 / S288c) OX=559292 GN=PST2 PE=1 SV=1	Q12335	PST2	21 kDa		unknown	3097900	1854500	10663000	22858000	0	-1	-1	-1	1	1	1	1	0	0	0	0	2	2	2	4	0	0	0	0
Vacuolar protein sorting-associated protein 74 OS=Saccharomyces cerevisiae (strain ATCC 204508 / S288c) OX=559292 GN=VPS74 PE=1 SV=1	Q06385	VPS74	39 kDa		unknown	1499500	1146600	2343100	1094900	-1	0	-1	-1	1	1	1	1	0	0	0	0	3	2	3	2	0	0	0	0
54S ribosomal protein IMG1, mitochondrial OS=Saccharomyces cerevisiae (strain ATCC 204508 / S288c) OX=559292 GN=IMG1 PE=1 SV=1	P25626	IMG1	19 kDa		unknown	2844700	5558000	1766400	2838100	0	0	-1	-1	1	1	1	1	0	0	0	0	2	4	2	2	0	0	0	0
Signal recognition particle subunit SRP21 OS=Saccharomyces cerevisiae (strain ATCC 204508 / S288c) OX=559292 GN=SRP21 PE=1 SV=3	P32342	SRP21	18 kDa		unknown	13608000	12206000	12204000	8737600	-1	-1	-1	-1	1	1	1	1	0	0	0	0	3	3	2	2	0	0	0	0
Nucleolar protein 3 OS=Saccharomyces cerevisiae (strain ATCC 204508 / S288c) OX=559292 GN=NPL3 PE=1 SV=1	Q01560	NPL3	45 kDa		unknown	1659700	1157200	2009300	1007200	-1	-1	0	0	1	1	1	1	0	0	0	0	3	2	3	1	0	0	0	0
Rotenone-insensitive NADH-ubiquinone oxidoreductase, mitochondrial OS=Saccharomyces cerevisiae (strain ATCC 204508 / S288c) OX=559292 GN=NDI1 PE=1 SV=1	P32340	NDI1	57 kDa		unknown	2048700	171470	594460	62718	0	0	-1	0	1	1	0.98	0.97	0	0	0	0	5	2	1	2	0	0	0	0
Branched-chain-amino-acid aminotransferase, mitochondrial OS=Saccharomyces cerevisiae (strain ATCC 204508 / S288c) OX=559292 GN=BAT1 PE=1 SV=1	P38891	BAT1	44 kDa	TRUE	unknown	1557000	2140000	634350	1822800	-1	0	-1	-1	1	1	1	1	0	0	0	0	3	3	1	3	0	0	0	0
6-phosphogluconate dehydrogenase, decarboxylating 1 OS=Saccharomyces cerevisiae (strain ATCC 204508 / S288c) OX=559292 GN=GND1 PE=1 SV=1	P38720	GND1	54 kDa		unknown	1217500	389090	613710	737030	-1	-1	-1	-1	1	1	1	1	0	0	0	0	3	2	2	3	0	0	0	0
Inorganic phosphate transporter PHO86 OS=Saccharomyces cerevisiae (strain ATCC 204508 / S288c) OX=559292 GN=PHO86 PE=1 SV=1	P46956	PHO86	35 kDa		unknown	992120	675700	3470400	5167900	0	0	-1	-1	1	0.97	1	1	0	0	0	0	2	1	3	4	0	0	0	0
Endoplasmic reticulum vesicle protein 25 OS=Saccharomyces cerevisiae (strain ATCC 204508 / S288c) OX=559292 GN=ERV25 PE=1 SV=1	P54837	ERV25	24 kDa		unknown	225240	2833700	3379400	6493200	-1	0	-1	-1	0.97	1	1	1	0	0	0	0	1	2	3	3	0	0	0	0
37S ribosomal protein S18, mitochondrial OS=Saccharomyces cerevisiae (strain ATCC 204508 / S288c) OX=559292 GN=MRPS18 PE=1 SV=2	P42847	MRPS18	25 kDa		unknown	2266000	6920600	564120	3323400	-1	-1	-1	-1	1	1	0.98	1	0	0	0	0	2	4	1	3	0	0	0	0
Uncharacterized protein YGR122W OS=Saccharomyces cerevisiae (strain ATCC 204508 / S288c) OX=559292 GN=YGR122W PE=4 SV=1	P53272	YGR122W	45 kDa		unknown	949100	1183500	397950	464510	-1	-1	-1	-1	1	1	0.98	1	0	0	0	0	3	4	1	2	0	0	0	0
Regulator of ribosome biosynthesis OS=Saccharomyces cerevisiae (strain ATCC 204508 / S288c) OX=559292 GN=RRS1 PE=1 SV=1	Q08746	RRS1	23 kDa		unknown	5025700	4402300	5058500	1698300	-1	-1	-1	-1	1	1	1	0.97	0	0	0	0	2	2	4	1	0	0	0	0
Protein EMP47 OS=Saccharomyces cerevisiae (strain ATCC 204508 / S288c) OX=559292 GN=EMP47 PE=1 SV=1	P43555	EMP47	50 kDa		unknown	865470	373080	9324300	7465300	-1	-1	-1	-1	1	0.97	1	1	0	0	0	0	3	1	3	3	0	0	0	0
U3 small nucleolar ribonucleoprotein protein IMP3 OS=Saccharomyces cerevisiae (strain ATCC 204508 / S288c) OX=559292 GN=IMP3 PE=1 SV=1	P32899	IMP3	22 kDa		unknown	1902000	776150	4882100	1707800	0	-1	-1	-1	1	0.97	1	1	0	0	0	0	2	1	4	3	0	0	0	0
Endosomal protein P24B OS=Saccharomyces cerevisiae (strain ATCC 204508 / S288c) OX=559292 GN=EMP24 PE=1 SV=1	P32803	EMP24	23 kDa		unknown	2674300	2004700	8337000	5417100	-1	0	-1	-1	1	0.97	1	1	0	0	0	0	2	1	3	4	0	0	0	0
2-oxoglutarate dehydrogenase, mitochondrial OS=Saccharomyces cerevisiae (strain ATCC 204508 / S288c) OX=559292 GN=KGD1 PE=1 SV=2	P20967	KGD1	114 kDa		unknown	-1	682410	173290	500120	0	406840	-1	0	0	1	1	1	0	0.97	0	0	0	4	2	3	0	1	0	0
Vacuolar membrane protein PEP3 OS=Saccharomyces cerevisiae (strain ATCC 204508 / S288c) OX=559292 GN=PEP3 PE=1 SV=1	P27801	PEP3	107 kDa		unknown	27293	59282	252440	128340	0	0	0	0	0.97	1	1	0.96	0	0	0	0	1	2	5	1	0	0	0	0
Small nuclear ribonucleoprotein-associated protein B OS=Saccharomyces cerevisiae (strain ATCC 204508 / S288c) OX=559292 GN=SMB1 PE=1 SV=1	P40018	SMB1	22 kDa		unknown	1637800	1563500	1128000	1918700	-1	-1	-1	-1	1	1	0.92	1	0	0	0	0	3	3	1	3	0	0	0	0
Probable tubulin--tyrosine ligase PBY1 OS=Saccharomyces cerevisiae (strain ATCC 204508 / S288c) OX=559292 GN=PBY1 PE=1 SV=2	P38254	PBY1	86 kDa		unknown	200010	250100	672200	197170	0	0	0	-1	0.79	1	1	1	0	0.07	0	0	1	2	4	1	0	0	0	0
E3 ubiquitin-protein ligase PEP5 OS=Saccharomyces cerevisiae (strain ATCC 204508 / S288c) OX=559292 GN=PEP5 PE=1 SV=2	P12868	PEP5	117 kDa		unknown	143160	352930	289050	176940	0	0	-1	0	0.58	1	1	0.97	0	0.12	0	0	1	4	3	1	0	0	0	0
Mitochondrial import receptor subunit TOM22 OS=Saccharomyces cerevisiae (strain ATCC 204508 / S288c) OX=559292 GN=TOM22 PE=1 SV=3	P49334	TOM22	17 kDa		unknown	0	7921100	26923000	27660000	-1	0	-1	-1	0	1	1	1	0	0	0	0	0	2	3	4	0	0	0	0
Cytochrome c1, heme protein, mitochondrial OS=Saccharomyces cerevisiae (strain ATCC 204508 / S288c) OX=559292 GN=CYT1 PE=1 SV=1	P07143	CYT1	34 kDa		unknown	-1	0	1446200	21600000	-1	1532700	0	-1	0	0	0.98	1	0	0.97	0	0	0	0	1	7	0	1	0	0
CAAX prenyl protease 1 OS=Saccharomyces cerevisiae (strain ATCC 204508 / S288c) OX=559292 GN=STE24 PE=1 SV=1	P47154	STE24	52 kDa		unknown	-1	-1	2947600	6278200	-1	0	0	-1	0	0	1	1	0	0	0	0	0	0	4	5	0	0	0	0
Replication factor C subunit 5 OS=Saccharomyces cerevisiae (strain ATCC 204508 / S288c) OX=559292 GN=RFC5 PE=1 SV=1	P38251	RFC5	40 kDa		unknown	1386000	1775500	1724200	1837400	0	2714300	-1	1865700	0.91	1	0.92	1	0	0.88	0	0.99	1	2	1	2	0	1	0	1
37S ribosomal protein S7, mitochondrial OS=Saccharomyces cerevisiae (strain ATCC 204508 / S288c) OX=559292 GN=RSM7 PE=1 SV=1	P47150	RSM7	28 kDa		unknown	982210	950840	747840	289470	0	681870	833390	0	1	1	0.98	0.97	0	0.56	0.86	0	2	2	1	1	0	1	1	0
Actin-related protein 2 OS=Saccharomyces cerevisiae (strain ATCC 204508 / S288c) OX=559292 GN=ARP2 PE=1 SV=1	P32381	ARP2	44 kDa		unknown	455470	1295700	1392000	0	-1	1062600	821810	-1	1	1	1	0.16	0	0.88	0.86	0	2	2	2	0	0	1	1	0
Putative protease AXL1 OS=Saccharomyces cerevisiae (strain ATCC 204508 / S288c) OX=559292 GN=AXL1 PE=1 SV=2	P40851	AXL1	138 kDa		unknown	138250	224440	192060	216160	0	305480000	0	0	1	1	1	1	0	0.54	0	0.13	2	2	2	2	0	1	0	0
Uncharacterized RNA-binding protein YGR250C OS=Saccharomyces cerevisiae (strain ATCC 204508 / S288c) OX=559292 GN=YGR250C PE=1 SV=1	P53316	YGR250C	90 kDa		unknown	116600	500010	278550	0	0	269320	0	-1	0.97	1	0.55	0.97	0	0.97	0.13	0	1	4	1	1	0	1	0	0
AP-1 accessory protein LAA1 OS=Saccharomyces cerevisiae (strain ATCC 204508 / S288c) OX=559292 GN=LAA1 PE=1 SV=1	P39526	LAA1	230 kDa		unknown	173110	96363	53443	112220	0	0	-1	-1	1	1	1	1	0	0.3	0	0	2	2	2	2	0	0	0	0
Post-transcriptional regulator MKT1 OS=Saccharomyces cerevisiae (strain ATCC 204508 / S288c) OX=559292 GN=MKT1 PE=1 SV=2	P40850	MKT1	94 kDa		unknown	326400	337760	241440	203390	0	167830	-1	0	1	1	1	0.97	0	0.37	0	0	2	3	2	1	0	1	0	0
Histone H2A.Z OS=Saccharomyces cerevisiae (strain ATCC 204508 / S288c) OX=559292 GN=HTZ1 PE=1 SV=3	Q12692	HTZ1	14 kDa	TRUE	unknown	6804200	0	-1	0	30765000	0	0	28606000	1	0.97	0	0	1	0	0	0.98	2	1	0	0	2	0	0	2
Nucleoporin NUP120 OS=Saccharomyces cerevisiae (strain ATCC 204508 / S288c) OX=559292 GN=NUP120 PE=1 SV=1	P35729	NUP120	120 kDa		unknown	760270	468270	715390	84454	0	0	-1	0	1	1	1	0.98	0	0	0	0	3	2	3	1	0	0	0	0
Glutathione-specific gamma-glutamylcyclotransferase OS=Saccharomyces cerevisiae (strain ATCC 204508 / S288c) OX=559292 GN=GCG1 PE=1 SV=1	P32656	GCG1	26 kDa		unknown	1854200	2412800	2625900	1681200	-1	0	-1	-1	1	1	1	1	0	0	0	0	2	2	3	2	0	0	0	0
13 kDa ribonucleoprotein-associated protein OS=Saccharomyces cerevisiae (strain ATCC 204508 / S288c) OX=559292 GN=SNU13 PE=1 SV=1	P39990	SNU13	14 kDa		unknown	15702000	11237000	17171000	12181000	-1	0	-1	-1	1	1	1	1	0	0	0	0	3	2	2	2	0	0	0	0
Eukaryotic translation initiation factor 5 OS=Saccharomyces cerevisiae (strain ATCC 204508 / S288c) OX=559292 GN=TIF5 PE=1 SV=1	P38431	TIF5	45 kDa		unknown	1342400	397490	1743500	861020	-1	0	-1	-1	1	1	1	1	0	0	0	0	2	2	2	3	0	0	0	0
54S ribosomal protein L23, mitochondrial OS=Saccharomyces cerevisiae (strain ATCC 204508 / S288c) OX=559292 GN=MRPL23 PE=1 SV=1	Q12487	MRPL23	18 kDa		unknown	1612900	940550	658540	1204000	0	0	0	0	1	1	1	1	0	0	0	0	2	2	2	3	0	0	0	0
Proteasome subunit beta type-5 OS=Saccharomyces cerevisiae (strain ATCC 204508 / S288c) OX=559292 GN=PRE2 PE=1 SV=3	P30656	PRE2	32 kDa		unknown	780370	3064600	1837200	1684300	-1	0	-1	0	0.97	1	1	1	0	0	0	0	1	4	2	2	0	0	0	0
26S proteasome regulatory subunit RPN8 OS=Saccharomyces cerevisiae (strain ATCC 204508 / S288c) OX=559292 GN=RPN8 PE=1 SV=3	Q08723	RPN8	38 kDa		unknown	1151500	1965700	0	732760	0	0	-1	-1	1	1	0.96	1	0	0	0	0	2	3	1	3	0	0	0	0
Serine/threonine-protein kinase SCH9 OS=Saccharomyces cerevisiae (strain ATCC 204508 / S288c) OX=559292 GN=SCH9 PE=1 SV=3	P11792	SCH9	92 kDa		unknown	1031800	742450	1565500	600480	-1	0	0	-1	1	1	1	0.97	0	0	0	0	3	2	3	1	0	0	0	0
Uncharacterized protein YPL245W OS=Saccharomyces cerevisiae (strain ATCC 204508 / S288c) OX=559292 GN=YPL245W PE=1 SV=1	Q12179	YPL245W	52 kDa		unknown	326720	549570	134430	331690	0	0	-1	0	1	1	0.98	1	0	0	0	0	2	3	1	2	0	0	0	0
ATP-dependent RNA helicase MRH4, mitochondrial OS=Saccharomyces cerevisiae (strain ATCC 204508 / S288c) OX=559292 GN=MRH4 PE=1 SV=1	P53166	MRH4	63 kDa		unknown	429090	459980	158500	360190	0	0	0	0	1	1	0.98	1	0	0	0	0	3	3	1	2	0	0	0	0
Calcium-transporting ATPase 1 OS=Saccharomyces cerevisiae (strain ATCC 204508 / S288c) OX=559292 GN=PMR1 PE=1 SV=1	P13586	PMR1	105 kDa		unknown	371560	143840	923810	855190	0	-1	0	0	1	0.97	1	1	0	0	0	0	2	1	3	3	0	0	0	0
RNA exonuclease 4 OS=Saccharomyces cerevisiae (strain ATCC 204508 / S288c) OX=559292 GN=REX4 PE=1 SV=1	Q08237	REX4	33 kDa		unknown	4285300	1419000	1833900	1482700	-1	0	0	0	1	1	0.98	1	0	0	0	0	4	2	1	2	0	0	0	0
Signal recognition particle subunit SEC65 OS=Saccharomyces cerevisiae (strain ATCC 204508 / S288c) OX=559292 GN=SEC65 PE=1 SV=1	P29478	SEC65	31 kDa		unknown	989170	1465900	2165800	1936100	0	-1	0	0	0.97	1	1	1	0	0	0	0	1	3	2	3	0	0	0	0
Elongation of fatty acids protein 3 OS=Saccharomyces cerevisiae (strain ATCC 204508 / S288c) OX=559292 GN=ELO3 PE=1 SV=1	P40319	ELO3	39 kDa		unknown	4885800	2276700	4220900	1649800	0	0	-1	-1	1	1	1	0.97	0	0	0	0	3	2	3	1	0	0	0	0
Transcription elongation factor SPT5 OS=Saccharomyces cerevisiae (strain ATCC 204508 / S288c) OX=559292 GN=SPT5 PE=1 SV=1	P27692	SPT5	116 kDa		unknown	177530	201240	375400	143120	0	0	0	-1	1	1	1	0.97	0	0	0	0	3	2	3	1	0	0	0	0
Reticulon-like protein 1 OS=Saccharomyces cerevisiae (strain ATCC 204508 / S288c) OX=559292 GN=RTN1 PE=1 SV=1	Q04947	RTN1	33 kDa		unknown	1310800	2760000	2392700	4744000	0	0	0	0	0.97	1	0.98	1	0	0	0	0	1	3	1	4	0	0	0	0
Bud site selection protein 20 OS=Saccharomyces cerevisiae (strain ATCC 204508 / S288c) OX=559292 GN=BUD20 PE=1 SV=1	Q08004	BUD20	19 kDa		unknown	1469900	3529900	913150	5693000	-1	-1	-1	-1	0.97	1	0.98	1	0	0	0	0	2	3	1	3	0	0	0	0
Signal recognition particle subunit SRP14 OS=Saccharomyces cerevisiae (strain ATCC 204508 / S288c) OX=559292 GN=SRP14 PE=1 SV=1	P38985	SRP14	16 kDa		unknown	1196500	3426700	5695700	919990	-1	-1	-1	-1	0.97	1	1	0.97	0	0	0	0	2	3	3	1	0	0	0	0
Signal recognition particle receptor subunit beta OS=Saccharomyces cerevisiae (strain ATCC 204508 / S288c) OX=559292 GN=SRP102 PE=1 SV=1	P36057	SRP102	27 kDa		unknown	1161200	1246000	4028700	2169200	0	0	-1	-1	0.97	0.97	1	1	0	0	0	0	1	1	5	2	0	0	0	0
Transcription factor PDR1 OS=Saccharomyces cerevisiae (strain ATCC 204508 / S288c) OX=559292 GN=PDR1 PE=1 SV=2	P12383	PDR1	122 kDa		unknown	206010	151380	223760	120580	-1	0	0	0	1	1	1	0.91	0	0	0	0	4	2	2	1	0	0	0	0
Inner nuclear membrane protein HEH2 OS=Saccharomyces cerevisiae (strain ATCC 204508 / S288c) OX=559292 GN=HEH2 PE=1 SV=1	Q03281	HEH2	76 kDa		unknown	71014	0	344920	233380	0	0	-1	-1	0.9	0.97	1	1	0	0	0	0	1	1	4	2	0	0	0	0
Sodium transport ATPase 2 OS=Saccharomyces cerevisiae (strain ATCC 204508 / S288c) OX=559292 GN=ENA2 PE=1 SV=1	Q01896 (+2)	ENA2	120 kDa		unknown	332810	489690	910120	55216	0	0	0	-1	1	1	1	0.53	0	0	0	0	2	3	3	1	0	0	0	0
Nucleoporin GLE2 OS=Saccharomyces cerevisiae (strain ATCC 204508 / S288c) OX=559292 GN=GLE2 PE=1 SV=1	P40066	GLE2	41 kDa		unknown	-1	299440	3035800	1874900	-1	0	-1	-1	0	1	1	1	0	0	0	0	0	2	4	3	0	0	0	0
Cluster of ISWI chromatin-remodeling complex ATPase ISW2 OS=Saccharomyces cerevisiae (strain ATCC 204508 / S288c) OX=559292 GN=ISW2 PE=1 SV=1 (Q08773)	Q08773 [2]	ISW2	130 kDa	TRUE	unknown	143330	0	193300	113820	0	0	0	0	1	0	1	1	0	0	0	0	3	0	3	3	0	0	0	0
Actin-like protein ARP9 OS=Saccharomyces cerevisiae (strain ATCC 204508 / S288c) OX=559292 GN=ARP9 PE=1 SV=1	Q05123	ARP9	53 kDa		unknown	1664900	0	1981400	1900000	-1	0	-1	-1	1	0	1	1	0	0	0	0	3	0	3	3	0	0	0	0
Vacuolar transporter chaperone 2 OS=Saccharomyces cerevisiae (strain ATCC 204508 / S288c) OX=559292 GN=VTC2 PE=1 SV=1	P43585	VTC2	95 kDa		unknown	370880	0	639410	362500	-1	0	0	0	1	0	1	1	0	0	0	0	3	0	4	2	0	0	0	0
37S ribosomal protein S10, mitochondrial OS=Saccharomyces cerevisiae (strain ATCC 204508 / S288c) OX=559292 GN=RSM10 PE=1 SV=1	Q03201	RSM10	23 kDa		unknown	2972700	3705800	3265700	5292400	0	8169600	3623000	0	0.97	0.97	0.98	1	0	1	0.97	0	1	1	1	2	0	2	1	0
Proteasome subunit beta type-4 OS=Saccharomyces cerevisiae (strain ATCC 204508 / S288c) OX=559292 GN=PRE1 PE=1 SV=2	P22141	PRE1	23 kDa		unknown	524860	665670	520720	410880	0	4445800	0	0	0.91	0.91	0.92	1	0	1	0.93	0	1	1	1	2	0	2	1	0
Mannan polymerase complexes subunit MNN9 OS=Saccharomyces cerevisiae (strain ATCC 204508 / S288c) OX=559292 GN=MNN9 PE=1 SV=3	P39107	MNN9	46 kDa		unknown	541150	471860	1503200	4101000	-1	1244000	669880	0	0.97	0.97	0.98	1	0	0.97	0.68	0.07	1	1	1	3	0	1	1	0
Protein CCC1 OS=Saccharomyces cerevisiae (strain ATCC 204508 / S288c) OX=559292 GN=CCC1 PE=1 SV=1	P47818	CCC1	34 kDa		unknown	636560	1232900	1804100	962260	0	1099300	0	-1	0.97	1	1	0.97	0	0.97	0.1	0	1	2	2	1	0	1	0	0
Probable electron transfer flavoprotein-ubiquinone oxidoreductase, mitochondrial OS=Saccharomyces cerevisiae (strain ATCC 204508 / S288c) OX=559292 GN=CIR2 PE=1 SV=1	Q08822	CIR2	70 kDa		unknown	217120	126460	151430	208390	0	395960	0	0	1	0.97	1	1	0.06	0.97	0	0	2	1	2	2	0	1	0	0
Ypt/Rab-type GTPase YPT7 OS=Saccharomyces cerevisiae (strain ATCC 204508 / S288c) OX=559292 GN=YPT7 PE=1 SV=1	P32939	YPT7	23 kDa		unknown	3493600	1557300	3187800	224680	-1	1216900	0	0	1	0.97	1	0.97	0	0.97	0	0	2	1	3	1	0	1	0	0
Prephenate dehydrogenase [NADP(+)] OS=Saccharomyces cerevisiae (strain ATCC 204508 / S288c) OX=559292 GN=TYR1 PE=1 SV=2	P20049	TYR1	51 kDa		unknown	319030	413780	843690	803160	0	2266500	0	849330	0.97	0.97	1	1	0	0.27	0	0.69	1	1	2	2	0	1	0	1
Protein ORM1 OS=Saccharomyces cerevisiae (strain ATCC 204508 / S288c) OX=559292 GN=ORM1 PE=1 SV=1	P53224	ORM1	25 kDa		unknown	1169500	2548800	4128500	5150000	-1	3162000	0	-1	0.97	1	1	1	0	0.89	0	0	1	2	2	2	0	1	0	0
Regulator of Ty1 transposition protein 10 OS=Saccharomyces cerevisiae (strain ATCC 204508 / S288c) OX=559292 GN=RTT10 PE=1 SV=1	Q08924	RTT10	114 kDa		unknown	122210	167000	121930	136820	0	457090	-1	0	0.91	1	1	0.91	0	1	0	0	1	2	2	1	0	2	0	0
Trafficking protein particle complex II-specific subunit 130 OS=Saccharomyces cerevisiae (strain ATCC 204508 / S288c) OX=559292 GN=TRS130 PE=1 SV=1	Q03660	TRS130	128 kDa		unknown	114190	157460	111510	250630	0	0	0	0	1	1	0.88	1	0	0.66	0	0	2	2	1	2	0	1	0	0
Actin-related protein 3 OS=Saccharomyces cerevisiae (strain ATCC 204508 / S288c) OX=559292 GN=ARP3 PE=1 SV=1	P47117	ARP3	50 kDa		unknown	727950	631640	413730	293250	0	395520	-1	0	1	1	0.98	0.97	0	0.49	0	0	3	2	1	1	0	1	0	0
Guanine nucleotide-binding protein alpha-1 subunit OS=Saccharomyces cerevisiae (strain ATCC 204508 / S288c) OX=559292 GN=GPA1 PE=1 SV=3	P08539	GPA1	54 kDa		unknown	347550	399660	248620	442700	0	0	0	-1	1	1	0.98	1	0.16	0	0	0	2	2	1	2	0	0	0	0
Casein kinase I homolog HRR25 OS=Saccharomyces cerevisiae (strain ATCC 204508 / S288c) OX=559292 GN=HRR25 PE=1 SV=1	P29295	HRR25	57 kDa		unknown	298780	885240	956930	281440	-1	0	-1	0	0.97	1	1	1	0	0	0	0.17	1	2	2	1	0	0	0	0
tRNA wybutosine-synthesizing protein 4 OS=Saccharomyces cerevisiae (strain ATCC 204508 / S288c) OX=559292 GN=PPM2 PE=1 SV=2	Q08282	PPM2	79 kDa		unknown	722170	302920	719110	183550	0	0	0	-1	1	0.97	1	0.97	0	0.18	0	0	2	2	2	1	0	0	0	0
Vacuolar protein sorting-associated protein 1 OS=Saccharomyces cerevisiae (strain ATCC 204508 / S288c) OX=559292 GN=VPS1 PE=1 SV=2	P21576	VPS1	79 kDa		unknown	240100	145110	260980	104500	0	0	-1	0	1	1	1	0.97	0	0.06	0	0	2	2	2	1	0	0	0	0
ATP synthase subunit e, mitochondrial OS=Saccharomyces cerevisiae (strain ATCC 204508 / S288c) OX=559292 GN=TIM11 PE=1 SV=2	P81449	TIM11	11 kDa		unknown	11876000	13380000	14544000	9213300	0	0	0	0	1	1	1	1	0	0	0	0	2	2	2	2	0	0	0	0
rRNA-processing protein UTP23 OS=Saccharomyces cerevisiae (strain ATCC 204508 / S288c) OX=559292 GN=UTP23 PE=1 SV=1	Q12339	UTP23	29 kDa		unknown	2639400	2842300	3138700	2892100	0	0	-1	0	1	1	1	1	0	0	0	0	2	2	2	2	0	0	0	0
Lon protease homolog, mitochondrial OS=Saccharomyces cerevisiae (strain ATCC 204508 / S288c) OX=559292 GN=PIM1 PE=1 SV=2	P36775	PIM1	127 kDa		unknown	242330	157490	397560	0	0	191160	0	0	1	1	1	0	0	0.97	0	0.06	2	2	3	0	0	1	0	0
Transcriptional regulator URE2 OS=Saccharomyces cerevisiae (strain ATCC 204508 / S288c) OX=559292 GN=URE2 PE=1 SV=1	P23202	URE2	40 kDa		unknown	679520	435740	826910	429030	-1	-1	-1	0	1	1	0.92	1	0	0	0	0.1	2	2	1	2	0	0	0	0
Actin-related protein 4 OS=Saccharomyces cerevisiae (strain ATCC 204508 / S288c) OX=559292 GN=ARP4 PE=1 SV=1	P80428	ARP4	55 kDa		unknown	2421100	563980	145250	395340	0	-1	-1	-1	1	1	0.98	0.97	0.06	0	0	0	4	2	1	1	0	0	0	0
Histone H1 OS=Saccharomyces cerevisiae (strain ATCC 204508 / S288c) OX=559292 GN=HHO1 PE=1 SV=1	P53551	HHO1	28 kDa		unknown	3694200	1451500	4117500	3195900	0	0	-1	-1	1	1	1	1	0	0	0	0	2	2	2	2	0	0	0	0
Transcriptional regulatory protein TOD6 OS=Saccharomyces cerevisiae (strain ATCC 204508 / S288c) OX=559292 GN=TOD6 PE=1 SV=1	P34219	TOD6	59 kDa		unknown	332500	247010	194640	233550	0	0	-1	-1	1	1	1	1	0	0	0	0	2	2	2	2	0	0	0	0
Histone deacetylase RPD3 OS=Saccharomyces cerevisiae (strain ATCC 204508 / S288c) OX=559292 GN=RPD3 PE=1 SV=1	P32561	RPD3	49 kDa		unknown	664850	299220	391670	622530	0	0	0	-1	1	0.97	1	1	0	0	0	0	2	1	2	3	0	0	0	0
LETM1 domain-containing protein YLH47, mitochondrial OS=Saccharomyces cerevisiae (strain ATCC 204508 / S288c) OX=559292 GN=YLH47 PE=1 SV=1	Q06493	YLH47	52 kDa		unknown	638620	549630	472530	1137100	0	0	0	-1	1	1	0.98	1	0	0	0	0	2	2	1	3	0	0	0	0
Proliferating cell nuclear antigen OS=Saccharomyces cerevisiae (strain ATCC 204508 / S288c) OX=559292 GN=POL30 PE=1 SV=1	P15873	POL30	29 kDa		unknown	643650	368920	1214700	775300	-1	0	0	-1	1	0.97	1	1	0	0	0	0	2	1	3	2	0	0	0	0
Protein ERP1 OS=Saccharomyces cerevisiae (strain ATCC 204508 / S288c) OX=559292 GN=ERP1 PE=1 SV=1	Q05359	ERP1	25 kDa		unknown	1989000	740320	6438100	7493400	-1	0	-1	-1	1	0.98	1	1	0	0	0	0	2	1	3	2	0	0	0	0
37S ribosomal protein S26, mitochondrial OS=Saccharomyces cerevisiae (strain ATCC 204508 / S288c) OX=559292 GN=RSM26 PE=1 SV=1	P47141	RSM26	30 kDa		unknown	1682200	1143200	1789800	1223500	0	-1	-1	-1	1	1	0.98	1	0	0	0	0	2	2	2	2	0	0	0	0
Ribosome biogenesis protein ALB1 OS=Saccharomyces cerevisiae (strain ATCC 204508 / S288c) OX=559292 GN=ALB1 PE=1 SV=1	P47019	ALB1	19 kDa		unknown	7286900	10435000	5115700	2081800	0	-1	-1	0	1	1	1	0.97	0	0	0	0	2	3	2	1	0	0	0	0
Cytoplasmic 60S subunit biogenesis factor REH1 OS=Saccharomyces cerevisiae (strain ATCC 204508 / S288c) OX=559292 GN=REH1 PE=1 SV=1	Q06709	REH1	50 kDa		unknown	4039200	1454000	2627200	2308200	0	0	-1	-1	1	0.97	1	1	0	0	0	0	3	1	2	2	0	0	0	0
Lysophospholipase NTE1 OS=Saccharomyces cerevisiae (strain ATCC 204508 / S288c) OX=559292 GN=NTE1 PE=1 SV=1	Q04958	NTE1	187 kDa		unknown	189550	139660	121240	20941	0	0	0	0	1	1	1	0.97	0	0	0	0	3	2	2	1	0	0	0	0
Chitin synthase 1 OS=Saccharomyces cerevisiae (strain ATCC 204508 / S288c) OX=559292 GN=CHS1 PE=1 SV=2	P08004	CHS1	130 kDa		unknown	134860	64377	337700	353910	0	0	-1	-1	1	0.97	1	1	0	0	0	0	2	1	2	3	0	0	0	0
Alpha-1,3/1,6-mannosyltransferase ALG2 OS=Saccharomyces cerevisiae (strain ATCC 204508 / S288c) OX=559292 GN=ALG2 PE=1 SV=2	P43636	ALG2	58 kDa		unknown	112590	490470	1072700	566170	-1	0	0	0	1	0.97	1	1	0	0	0	0	1	1	2	3	0	0	0	0
Protein SOF1 OS=Saccharomyces cerevisiae (strain ATCC 204508 / S288c) OX=559292 GN=SOF1 PE=1 SV=1	P33750	SOF1	57 kDa		unknown	1313200	355980	651090	118090	0	0	-1	0	1	0.97	1	1	0	0	0	0	3	1	2	1	0	0	0	0
Ubiquitin fusion degradation protein 4 OS=Saccharomyces cerevisiae (strain ATCC 204508 / S288c) OX=559292 GN=UFD4 PE=1 SV=1	P33202	UFD4	168 kDa		unknown	81387	256630	148430	91053	0	0	0	0	0.97	1	1	0.91	0	0	0.07	0	1	3	2	1	0	0	0	0
Multiprotein-bridging factor 1 OS=Saccharomyces cerevisiae (strain ATCC 204508 / S288c) OX=559292 GN=MBF1 PE=1 SV=2	O14467	MBF1	16 kDa		unknown	3377900	1923800	14571000	2248400	-1	0	0	0	1	0.97	1	0.97	0	0	0	0	2	1	4	1	0	0	0	0
Bud emergence protein 4 OS=Saccharomyces cerevisiae (strain ATCC 204508 / S288c) OX=559292 GN=BEM4 PE=1 SV=1	P39011	BEM4	71 kDa		unknown	0	337150	397800	106220	-1	653230	0	-1	0	1	1	0.97	0	0.97	0	0	0	3	3	1	0	1	0	0
Nucleoporin NUP188 OS=Saccharomyces cerevisiae (strain ATCC 204508 / S288c) OX=559292 GN=NUP188 PE=1 SV=1	P52593	NUP188	189 kDa		unknown	71087	67008	0	400790	0	0	0	0	0.97	0.97	0.98	1	0	0	0	0	1	1	1	5	0	0	0	0
Actin-related protein 2/3 complex subunit 4 OS=Saccharomyces cerevisiae (strain ATCC 204508 / S288c) OX=559292 GN=ARC19 PE=1 SV=2	P33204	ARC19	20 kDa		unknown	2719400	4516800	2574200	1441500	0	-1	-1	-1	1	1	1	0.91	0	0	0	0	2	3	2	1	0	0	0	0
Cluster of Protein phosphatase 2C homolog 3 OS=Saccharomyces cerevisiae (strain ATCC 204508 / S288c) OX=559292 GN=PTC3 PE=1 SV=4 (P34221)	P34221 [2]	PTC3	51 kDa	TRUE	unknown	1702100	2852400	0	0	0	0	-1	-1	1	1	0.92	0.91	0	0	0	0	2	4	1	1	0	0	0	0
U2 snRNP component HSH155 OS=Saccharomyces cerevisiae (strain ATCC 204508 / S288c) OX=559292 GN=HSH155 PE=1 SV=1	P49955	HSH155	110 kDa		unknown	183650	260540	219700	411340	0	0	0	-1	0.91	1	0.92	1	0	0	0	0	1	2	1	4	0	0	0	0
Ribosome biogenesis protein UTP30 OS=Saccharomyces cerevisiae (strain ATCC 204508 / S288c) OX=559292 GN=UTP30 PE=1 SV=1	P36144	UTP30	32 kDa		unknown	1144700	667640	625490	513010	-1	0	-1	0	1	1	1	0.36	0	0	0	0	3	2	2	1	0	0	0	0
Cytochrome c oxidase subunit 13, mitochondrial OS=Saccharomyces cerevisiae (strain ATCC 204508 / S288c) OX=559292 GN=COX13 PE=1 SV=1	P32799	COX13	15 kDa		unknown	-1	5110500	2926800	19158000	-1	2307600	0	0	0	0.27	1	1	0	1	0	0	0	1	2	3	0	2	0	0
Glycerol-3-phosphate O-acyltransferase 1 OS=Saccharomyces cerevisiae (strain ATCC 204508 / S288c) OX=559292 GN=SCT1 PE=1 SV=3	P32784	SCT1	86 kDa		unknown	736440	437320	0	720930	0	0	0	0	1	0.97	0.1	1	0	0	0	0	3	1	0	3	0	0	0	0
Suppressor protein MPT5 OS=Saccharomyces cerevisiae (strain ATCC 204508 / S288c) OX=559292 GN=MPT5 PE=1 SV=2	P39016	MPT5	95 kDa		unknown	330590	350880	0	268310	-1	0	0	-1	1	1	0.1	1	0	0	0	0	2	2	0	2	0	0	0	0
Coatomer subunit zeta OS=Saccharomyces cerevisiae (strain ATCC 204508 / S288c) OX=559292 GN=RET3 PE=1 SV=1	P53600	RET3	22 kDa		unknown	3404300	2376400	1006700	-1	-1	0	-1	-1	1	1	0.98	0	0	0	0	0	3	4	1	0	0	0	0	0
Structural maintenance of chromosomes protein 3 OS=Saccharomyces cerevisiae (strain ATCC 204508 / S288c) OX=559292 GN=SMC3 PE=1 SV=1	P47037	SMC3	141 kDa		unknown	55895	155260	0	67289	0	0	0	-1	0.97	1	0	1	0	0	0	0	1	4	0	2	0	0	0	0
Transcription initiation factor TFIID subunit 5 OS=Saccharomyces cerevisiae (strain ATCC 204508 / S288c) OX=559292 GN=TAF5 PE=1 SV=1	P38129	TAF5	89 kDa		unknown	1147200	0	522990	161440	0	-1	-1	0	1	0	1	0.97	0	0	0	0	5	0	2	1	0	0	0	0
Serine hydroxymethyltransferase, cytosolic OS=Saccharomyces cerevisiae (strain ATCC 204508 / S288c) OX=559292 GN=SHM2 PE=1 SV=2	P37291	SHM2	52 kDa	TRUE	unknown	-1	615030	1975500	0	0	-1	0	-1	0	0.98	1	0	0	0	0.56	0	0	2	4	0	0	0	1	0
ATP-dependent RNA helicase DBP8 OS=Saccharomyces cerevisiae (strain ATCC 204508 / S288c) OX=559292 GN=DBP8 PE=1 SV=1	P38719	DBP8	48 kDa		unknown	657770	1425200	1218300	658520	0	0	1153700	-1	0.97	1	0.98	0.97	0	0.92	0.97	0	1	2	1	1	0	1	1	0
Sphingoid long chain base kinase 4 OS=Saccharomyces cerevisiae (strain ATCC 204508 / S288c) OX=559292 GN=LCB4 PE=1 SV=1	Q12246	LCB4	70 kDa		unknown	607200	310780	389500	525390	0	433200	0	0	1	0.97	0.98	1	0	0.95	0.05	0	2	1	1	2	0	1	0	0
Homocitrate dehydratase, mitochondrial OS=Saccharomyces cerevisiae (strain ATCC 204508 / S288c) OX=559292 GN=ACO2 PE=1 SV=1	P39533	ACO2	87 kDa		unknown	218930	144880	641290	178520	0	0	652070	-1	0.91	0.97	1	0.97	0	0	1	0	1	1	2	1	0	0	2	0
GPN-loop GTPase 2 OS=Saccharomyces cerevisiae (strain ATCC 204508 / S288c) OX=559292 GN=GPN2 PE=1 SV=1	Q08726	GPN2	40 kDa		unknown	1081500	655390	428820	510760	0	-1	849490	0	1	1	0.98	0.97	0	0	0.88	0	2	2	1	1	0	0	1	0
mRNA-decapping enzyme subunit 1 OS=Saccharomyces cerevisiae (strain ATCC 204508 / S288c) OX=559292 GN=DCP1 PE=1 SV=1	Q12517	DCP1	26 kDa		unknown	1081800	1280400	674490	1439400	-1	994500	0	-1	0.97	1	0.98	1	0	0.53	0	0	1	2	1	2	0	1	0	0
Uncharacterized transporter YBR287W OS=Saccharomyces cerevisiae (strain ATCC 204508 / S288c) OX=559292 GN=YBR287W PE=1 SV=1	P38355	YBR287W	48 kDa		unknown	-1	1672300	1540900	-1	0	1843400	1466900	1548100	0	1	1	0	0	0.97	0.75	0.42	0	2	2	0	0	1	1	1
Sister chromatid cohesion protein PDS5 OS=Saccharomyces cerevisiae (strain ATCC 204508 / S288c) OX=559292 GN=PDS5 PE=1 SV=1	Q04264	PDS5	147 kDa		unknown	85909	111270	66533	133280	0	0	0	0	0.97	1	0.98	1	0	0.12	0	0	1	2	1	2	0	0	0	0
Serine/threonine-protein kinase TOR2 OS=Saccharomyces cerevisiae (strain ATCC 204508 / S288c) OX=559292 GN=TOR2 PE=1 SV=3	P32600	TOR2	282 kDa		unknown	21205	45898	26308	20753	0	0	0	0	0.97	1	0.98	1	0.09	0	0	0	1	2	1	2	0	0	0	0
Adenine phosphoribosyltransferase 1 OS=Saccharomyces cerevisiae (strain ATCC 204508 / S288c) OX=559292 GN=APT1 PE=1 SV=3	P49435	APT1	21 kDa		unknown	2159300	2949100	1494000	2657000	-1	-1	0	-1	1	1	0.98	1	0	0	0	0	2	2	1	2	0	0	0	0
DNA-directed RNA polymerase II subunit RPB1 OS=Saccharomyces cerevisiae (strain ATCC 204508 / S288c) OX=559292 GN=RPO21 PE=1 SV=2	P04050	RPO21	192 kDa		unknown	74787	80728	0	148900	0	0	0	-1	1	1	0.98	1	0	0	0	0	2	2	1	2	0	0	0	0
Eukaryotic translation initiation factor 2 subunit beta OS=Saccharomyces cerevisiae (strain ATCC 204508 / S288c) OX=559292 GN=SUI3 PE=1 SV=2	P09064	SUI3	32 kDa		unknown	735470	913250	185450	1270000	0	-1	0	-1	1	1	1	1	0	0	0	0	2	2	1	2	0	0	0	0
Protein LTV1 OS=Saccharomyces cerevisiae (strain ATCC 204508 / S288c) OX=559292 GN=LTV1 PE=1 SV=2	P34078	LTV1	53 kDa		unknown	2221800	2008900	1655000	2214900	-1	0	0	-1	1	1	0.98	1	0	0	0	0	2	2	1	2	0	0	0	0
PAB1-binding protein 2 OS=Saccharomyces cerevisiae (strain ATCC 204508 / S288c) OX=559292 GN=PBP2 PE=1 SV=1	P38151	PBP2	46 kDa		unknown	569000	755050	398390	389640	0	0	0	0	0.97	1	0.98	0.97	0	0	0.06	0	2	2	2	1	0	0	0	0
Delta(7)-sterol 5(6)-desaturase OS=Saccharomyces cerevisiae (strain ATCC 204508 / S288c) OX=559292 GN=ERG3 PE=1 SV=1	P32353	ERG3	43 kDa		unknown	695340	2744600	352420	294660	-1	0	-1	-1	1	1	0.99	0.97	0	0	0	0	2	2	2	1	0	0	0	0
54S ribosomal protein L6, mitochondrial OS=Saccharomyces cerevisiae (strain ATCC 204508 / S288c) OX=559292 GN=MRPL6 PE=1 SV=2	P32904	MRPL6	24 kDa		unknown	2218600	1040100	1460100	870370	0	0	0	-1	1	1	1	0.97	0	0	0	0	2	2	2	1	0	0	0	0
RING-box protein HRT1 OS=Saccharomyces cerevisiae (strain ATCC 204508 / S288c) OX=559292 GN=HRT1 PE=1 SV=1	Q08273	HRT1	14 kDa		unknown	4876100	5946100	2980400	3146400	-1	-1	-1	-1	1	1	0.98	1	0	0	0	0	2	2	1	2	0	0	0	0
37S ribosomal protein S8, mitochondrial OS=Saccharomyces cerevisiae (strain ATCC 204508 / S288c) OX=559292 GN=MRPS8 PE=1 SV=1	Q03799	MRPS8	17 kDa		unknown	2616000	2439400	2291600	902130	-1	-1	-1	-1	1	1	1	0.97	0	0	0	0	2	2	2	1	0	0	0	0
DNA-directed RNA polymerases I, II, and III subunit RPABC5 OS=Saccharomyces cerevisiae (strain ATCC 204508 / S288c) OX=559292 GN=RPB10 PE=1 SV=2	P22139	RPB10	8 kDa		unknown	8809300	9426600	8551500	957170	-1	-1	-1	-1	1	1	1	0.97	0	0	0	0	2	2	2	1	0	0	0	0
ATP synthase subunit f, mitochondrial OS=Saccharomyces cerevisiae (strain ATCC 204508 / S288c) OX=559292 GN=ATP17 PE=1 SV=1	Q06405	ATP17	11 kDa		unknown	7218000	15881000	8824100	7305100	0	-1	-1	-1	1	1	1	0.97	0	0	0	0	2	2	2	1	0	0	0	0
SWI5-dependent HO expression protein 2 OS=Saccharomyces cerevisiae (strain ATCC 204508 / S288c) OX=559292 GN=SHE2 PE=1 SV=1	P36068	SHE2	28 kDa		unknown	541030	672010	976520	252930	-1	0	-1	-1	1	1	1	0.97	0	0	0	0	2	2	2	1	0	0	0	0
Nucleoporin NUP157 OS=Saccharomyces cerevisiae (strain ATCC 204508 / S288c) OX=559292 GN=NUP157 PE=1 SV=1	P40064	NUP157	157 kDa		unknown	58117	75631	386780	86307	0	0	0	0	0.97	1	1	0.97	0	0	0	0	1	2	3	1	0	0	0	0
54S ribosomal protein L9, mitochondrial OS=Saccharomyces cerevisiae (strain ATCC 204508 / S288c) OX=559292 GN=MRPL9 PE=1 SV=3	P31334	MRPL9	30 kDa		unknown	1729700	2046500	278620	1409300	0	0	0	0	1	1	1	0.97	0	0	0	0	2	2	2	1	0	0	0	0
Serine/threonine-protein phosphatase PP1-1 OS=Saccharomyces cerevisiae (strain ATCC 204508 / S288c) OX=559292 GN=SIT4 PE=1 SV=1	P20604	SIT4	36 kDa		unknown	864280	927610	978980	522450	-1	-1	-1	-1	1	1	1	0.97	0	0	0	0	2	2	2	1	0	0	0	0
DNA-directed RNA polymerases I, II, and III subunit RPABC1 OS=Saccharomyces cerevisiae (strain ATCC 204508 / S288c) OX=559292 GN=RPB5 PE=1 SV=1	P20434	RPB5	25 kDa		unknown	2421400	360480	2820500	2468000	-1	-1	-1	-1	1	0.97	1	1	0	0	0	0	2	1	2	2	0	0	0	0
Homoaconitase, mitochondrial OS=Saccharomyces cerevisiae (strain ATCC 204508 / S288c) OX=559292 GN=LYS4 PE=1 SV=1	P49367	LYS4	75 kDa		unknown	0	0	267240	306840	0	0	0	-1	0.97	1	1	1	0	0	0	0	1	1	2	2	0	0	0	0
Inorganic pyrophosphatase OS=Saccharomyces cerevisiae (strain ATCC 204508 / S288c) OX=559292 GN=IPP1 PE=1 SV=4	P00817	IPP1	32 kDa		unknown	1447900	1732500	274200	385050	-1	0	-1	0	1	1	0.98	0.97	0	0	0	0	2	3	1	1	0	0	0	0
General transcriptional corepressor TUP1 OS=Saccharomyces cerevisiae (strain ATCC 204508 / S288c) OX=559292 GN=TUP1 PE=1 SV=2	P16649	TUP1	78 kDa		unknown	188730	136070	112160	110670	0	-1	-1	-1	1	1	0.98	0.97	0	0	0	0	3	2	1	1	0	0	0	0
Probable alpha-1,6-mannosyltransferase MNN11 OS=Saccharomyces cerevisiae (strain ATCC 204508 / S288c) OX=559292 GN=MNN11 PE=1 SV=2	P46985	MNN11	48 kDa		unknown	281280	234770	1081900	2910400	0	0	0	0	0.97	0.97	1	1	0	0	0	0	1	1	2	3	0	0	0	0
J protein JJJ1 OS=Saccharomyces cerevisiae (strain ATCC 204508 / S288c) OX=559292 GN=JJJ1 PE=1 SV=1	P53863	JJJ1	69 kDa		unknown	329270	122780	948400	669670	-1	0	-1	-1	0.97	0.97	1	1	0	0	0	0	1	1	3	2	0	0	0	0
RNA annealing protein YRA2 OS=Saccharomyces cerevisiae (strain ATCC 204508 / S288c) OX=559292 GN=YRA2 PE=1 SV=1	P36036	YRA2	24 kDa		unknown	664840	895010	953470	1681500	-1	-1	-1	-1	0.97	1	0.98	1	0	0	0	0	1	2	1	3	0	0	0	0
Very-long-chain 3-oxoacyl-CoA reductase OS=Saccharomyces cerevisiae (strain ATCC 204508 / S288c) OX=559292 GN=IFA38 PE=1 SV=1	P38286	IFA38	39 kDa		unknown	287560	406050	522460	1368100	0	0	0	0	0.97	1	0.98	1	0	0	0	0	1	2	1	3	0	0	0	0
Protein disulfide-isomerase MPD1 OS=Saccharomyces cerevisiae (strain ATCC 204508 / S288c) OX=559292 GN=MPD1 PE=1 SV=1	Q12404	MPD1	36 kDa		unknown	226000	282570	247050	719350	0	0	0	0	0.98	0.97	1	1	0	0	0	0	1	1	3	2	0	0	0	0
54S ribosomal protein L36, mitochondrial OS=Saccharomyces cerevisiae (strain ATCC 204508 / S288c) OX=559292 GN=MRPL36 PE=1 SV=3	P36531	MRPL36	20 kDa		unknown	422320	1088200	1270000	1145500	-1	0	-1	-1	0.97	1	1	0.97	0	0	0	0	1	2	2	2	0	0	0	0
Signal peptidase complex subunit SPC3 OS=Saccharomyces cerevisiae (strain ATCC 204508 / S288c) OX=559292 GN=SPC3 PE=1 SV=1	Q12133	SPC3	21 kDa		unknown	982950	3107200	2527200	1702700	-1	0	-1	-1	0.97	1	1	0.97	0	0	0	0	1	2	2	1	0	0	0	0
Probable alpha-1,6-mannosyltransferase MNN10 OS=Saccharomyces cerevisiae (strain ATCC 204508 / S288c) OX=559292 GN=MNN10 PE=1 SV=1	P50108	MNN10	47 kDa		unknown	272800	172830	884620	2215600	0	0	0	-1	0.97	0.97	1	1	0	0	0	0	1	1	2	3	0	0	0	0
tRNA (adenine(58)-N(1))-methyltransferase non-catalytic subunit TRM6 OS=Saccharomyces cerevisiae (strain ATCC 204508 / S288c) OX=559292 GN=GCD10 PE=1 SV=1	P41814	GCD10	54 kDa		unknown	2979400	536910	2221700	1523900	-1	-1	-1	-1	1	0.97	1	0.97	0	0	0	0	2	1	3	1	0	0	0	0
Lysophosphatidic acid:oleoyl-CoA acyltransferase 1 OS=Saccharomyces cerevisiae (strain ATCC 204508 / S288c) OX=559292 GN=LOA1 PE=1 SV=1	Q06508	LOA1	34 kDa		unknown	1085700	444430	2178400	938270	-1	0	0	0	1	0.97	1	0.97	0	0	0	0	2	1	3	1	0	0	0	0
Replication factor A protein 3 OS=Saccharomyces cerevisiae (strain ATCC 204508 / S288c) OX=559292 GN=RFA3 PE=1 SV=1	P26755	RFA3	14 kDa		unknown	7031400	9069500	5856700	3859000	-1	0	-1	-1	0.97	1	0.98	0.97	0	0	0	0	2	2	2	1	0	0	0	0
Pre-rRNA-processing protein IPI1 OS=Saccharomyces cerevisiae (strain ATCC 204508 / S288c) OX=559292 GN=IPI1 PE=1 SV=1	P38803	IPI1	38 kDa		unknown	787200	223090	233000	231940	-1	-1	-1	-1	1	0.97	0.98	0.97	0	0	0	0	3	1	1	2	0	0	0	0
Mitochondrial 37S ribosomal protein S27 OS=Saccharomyces cerevisiae (strain ATCC 204508 / S288c) OX=559292 GN=RSM27 PE=1 SV=1	P53305	RSM27	12 kDa		unknown	4588300	2103700	1631800	2527200	0	-1	-1	0	1	0.97	0.98	0.97	0	0	0	0	2	2	1	2	0	0	0	0
Conserved oligomeric Golgi complex subunit 6 OS=Saccharomyces cerevisiae (strain ATCC 204508 / S288c) OX=559292 GN=COG6 PE=1 SV=1	P53959	COG6	97 kDa		unknown	148330	15550	27342	63163	0	0	-1	0	1	0.97	0.98	0.97	0	0	0	0	2	1	1	2	0	0	0	0
Protein SUR7 OS=Saccharomyces cerevisiae (strain ATCC 204508 / S288c) OX=559292 GN=SUR7 PE=1 SV=1	P54003	SUR7	34 kDa		unknown	1901200	1567200	2111600	5348000	-1	-1	-1	-1	1	0.91	1	1	0	0	0	0	2	1	2	2	0	0	0	0
Sulfite reductase [NADPH] subunit beta OS=Saccharomyces cerevisiae (strain ATCC 204508 / S288c) OX=559292 GN=MET5 PE=1 SV=1	P47169	MET5	161 kDa	TRUE	unknown	134690	218530	177000	41592	-1	0	0	0	0.97	1	1	0.9	0	0	0	0	1	2	2	1	0	0	0	0
Protein CBP3, mitochondrial OS=Saccharomyces cerevisiae (strain ATCC 204508 / S288c) OX=559292 GN=CBP3 PE=1 SV=1	P21560	CBP3	39 kDa		unknown	1452600	1895500	1291900	468940	0	0	0	0	1	1	0.98	0.91	0	0	0	0	2	3	1	1	0	0	0	0
Homoserine kinase OS=Saccharomyces cerevisiae (strain ATCC 204508 / S288c) OX=559292 GN=THR1 PE=1 SV=4	P17423	THR1	39 kDa		unknown	900800	1676500	965310	1106500	-1	-1	-1	-1	0.48	1	1	1	0	0	0	0	1	2	2	2	0	0	0	0
Seventh homolog of septin 1 OS=Saccharomyces cerevisiae (strain ATCC 204508 / S288c) OX=559292 GN=SHS1 PE=1 SV=1	Q07657	SHS1	63 kDa		unknown	111780	132050	170260	232480	0	0	-1	0	1	0.97	1	0.47	0	0	0	0	3	1	2	1	0	0	0	0
U3 small nucleolar ribonucleoprotein protein LCP5 OS=Saccharomyces cerevisiae (strain ATCC 204508 / S288c) OX=559292 GN=LCP5 PE=1 SV=1	P40079	LCP5	41 kDa		unknown	1297200	489540	1218700	1256000	0	0	-1	0	1	0.47	1	1	0	0	0	0	2	1	2	2	0	0	0	0
Bud site selection protein 22 OS=Saccharomyces cerevisiae (strain ATCC 204508 / S288c) OX=559292 GN=BUD22 PE=1 SV=1	Q04347	BUD22	60 kDa		unknown	1696800	125550	268740	94261	0	-1	0	0	1	0.97	0.48	0.97	0	0	0	0	4	1	1	1	0	0	0	0
Oligomycin resistance ATP-dependent permease YOR1 OS=Saccharomyces cerevisiae (strain ATCC 204508 / S288c) OX=559292 GN=YOR1 PE=1 SV=1	P53049	YOR1	167 kDa		unknown	0	22889	12001	113660	0	0	0	0	0.93	1	0.4	1	0	0	0	0.05	1	2	1	3	0	0	0	0
Uridine permease OS=Saccharomyces cerevisiae (strain ATCC 204508 / S288c) OX=559292 GN=FUI1 PE=1 SV=1	P38196	FUI1	72 kDa		unknown	658180	232370	95782	50192	-1	-1	-1	-1	1	1	0.27	0.96	0	0	0	0	3	2	1	1	0	0	0	0
Histone acetyltransferase GCN5 OS=Saccharomyces cerevisiae (strain ATCC 204508 / S288c) OX=559292 GN=GCN5 PE=1 SV=1	Q03330	GCN5	51 kDa		unknown	248900	57733	74405	173880	-1	0	0	-1	1	0.49	0.7	1	0	0	0	0	3	1	1	2	0	0	0	0
Mitochondrial respiratory chain complexes assembly protein YTA12 OS=Saccharomyces cerevisiae (strain ATCC 204508 / S288c) OX=559292 GN=YTA12 PE=1 SV=2	P40341	YTA12	93 kDa	TRUE	unknown	162810	60369	260800	234600	0	1543900	0	3303100	0.07	0.97	1	0.98	0	0.07	0	0.07	1	1	2	1	0	1	0	1
Single-strand telomeric DNA-binding protein GBP2 OS=Saccharomyces cerevisiae (strain ATCC 204508 / S288c) OX=559292 GN=GBP2 PE=1 SV=1	P25555	GBP2	49 kDa		unknown	0	842000	669760	1517000	-1	-1	-1	-1	0.16	1	0.98	1	0	0	0	0	0	1	1	3	0	0	0	0
Uncharacterized protein YDR089W OS=Saccharomyces cerevisiae (strain ATCC 204508 / S288c) OX=559292 GN=YDR089W PE=1 SV=2	P38966	YDR089W	99 kDa		unknown	367470	822910	348750	-1	0	0	-1	0	1	1	0.98	0	0	0.08	0	0	2	3	1	0	0	0	0	0
Mitochondrial distribution and morphology protein 38 OS=Saccharomyces cerevisiae (strain ATCC 204508 / S288c) OX=559292 GN=MDM38 PE=1 SV=1	Q08179	MDM38	65 kDa		unknown	225610	149840	36311	0	0	0	0	0	1	1	0.98	0	0	0	0	0	3	3	1	0	0	0	0	0
ATP-dependent RNA helicase DOB1 OS=Saccharomyces cerevisiae (strain ATCC 204508 / S288c) OX=559292 GN=MTR4 PE=1 SV=1	P47047	MTR4	122 kDa		unknown	166850	198180	0	309470	0	0	0	0	1	1	0	1	0	0	0	0	2	2	0	3	0	0	0	0
ATP synthase subunit d, mitochondrial OS=Saccharomyces cerevisiae (strain ATCC 204508 / S288c) OX=559292 GN=ATP7 PE=1 SV=2	P30902	ATP7	20 kDa		unknown	2802200	0	1016300	524310	-1	0	0	0	1	0	1	1	0	0	0	0	3	0	2	2	0	0	0	0
UBP3-associated protein BRE5 OS=Saccharomyces cerevisiae (strain ATCC 204508 / S288c) OX=559292 GN=BRE5 PE=1 SV=1	P53741	BRE5	58 kDa		unknown	727650	54417	139170	-1	-1	-1	0	-1	1	1	0.98	0	0	0	0	0	4	2	1	0	0	0	0	0
Actin-related protein 7 OS=Saccharomyces cerevisiae (strain ATCC 204508 / S288c) OX=559292 GN=ARP7 PE=1 SV=1	Q12406	ARP7	54 kDa		unknown	1046400	-1	88281	692210	0	0	-1	0	1	0	0.98	1	0	0	0	0	4	0	1	2	0	0	0	0
Exocyst complex component SEC3 OS=Saccharomyces cerevisiae (strain ATCC 204508 / S288c) OX=559292 GN=SEC3 PE=1 SV=1	P33332	SEC3	155 kDa		unknown	34899	94124	112150	0	0	0	-1	0	0.98	1	1	0	0	0	0	0	1	3	2	0	0	0	0	0
tRNA threonylcarbamoyladenosine dehydratase 2 OS=Saccharomyces cerevisiae (strain ATCC 204508 / S288c) OX=559292 GN=TCD2 PE=1 SV=1	P36101	TCD2	50 kDa		unknown	189580	0	946750	2201700	0	0	0	0	0.97	0	1	1	0	0	0	0	1	0	2	4	0	0	0	0
Importin subunit alpha OS=Saccharomyces cerevisiae (strain ATCC 204508 / S288c) OX=559292 GN=SRP1 PE=1 SV=1	Q02821	SRP1	60 kDa		unknown	0	1070300	563900	0	0	0	-1	0	0	1	1	0.97	0	0	0	0	0	4	2	1	0	0	0	0
Uncharacterized protein YMR295C OS=Saccharomyces cerevisiae (strain ATCC 204508 / S288c) OX=559292 GN=YMR295C PE=1 SV=1	Q03559	YMR295C	22 kDa		unknown	2723900	-1	4118700	11660000	-1	-1	-1	-1	0.97	0	0.98	1	0	0	0	0	1	0	1	5	0	0	0	0
Aldehyde dehydrogenase 5, mitochondrial OS=Saccharomyces cerevisiae (strain ATCC 204508 / S288c) OX=559292 GN=ALD5 PE=1 SV=4	P40047	ALD5	57 kDa		unknown	325990	529790	290360	374180	-1	406870	0	-1	0.97	1	0.98	0.97	0	0.97	0	0	1	2	1	1	0	1	0	0
Proteasome subunit beta type-1 OS=Saccharomyces cerevisiae (strain ATCC 204508 / S288c) OX=559292 GN=PRE3 PE=1 SV=2	P38624	PRE3	24 kDa		unknown	840630	792490	1842800	1155400	-1	-1	-1	2583100	0.91	0.92	1	0.93	0	0	0	0.97	1	1	2	1	0	0	0	1
Glutamate 5-kinase OS=Saccharomyces cerevisiae (strain ATCC 204508 / S288c) OX=559292 GN=PRO1 PE=1 SV=2	P32264	PRO1	47 kDa		unknown	130470	140710	552950	478130	-1	0	0	-1	0.97	0.97	1	0.97	0	0	0.2	0	1	1	2	1	0	0	1	0
Diphthine--ammonia ligase OS=Saccharomyces cerevisiae (strain ATCC 204508 / S288c) OX=559292 GN=DPH6 PE=1 SV=1	Q12429	DPH6	78 kDa		unknown	131620	170830	21281	122350	0	605780	0	0	0.67	1	0.97	0.97	0	0.39	0	0	1	2	1	1	0	1	0	0
Vacuolar aminopeptidase 1 OS=Saccharomyces cerevisiae (strain ATCC 204508 / S288c) OX=559292 GN=APE1 PE=1 SV=2	P14904	APE1	57 kDa		unknown	711620	0	175400	282950	0	0	0	0	1	0.97	0.98	0.97	0	0	0	0.12	2	1	1	1	0	0	0	0
Chromatin structure-remodeling complex subunit RSC4 OS=Saccharomyces cerevisiae (strain ATCC 204508 / S288c) OX=559292 GN=RSC4 PE=1 SV=2	Q02206	RSC4	72 kDa		unknown	372010	108990	139470	194830	0	0	0	0	1	0.97	0.98	1	0	0	0	0.06	2	1	1	2	0	0	0	0
Signal peptidase complex subunit SPC2 OS=Saccharomyces cerevisiae (strain ATCC 204508 / S288c) OX=559292 GN=SPC2 PE=1 SV=1	Q04969	SPC2	21 kDa		unknown	863260	0	2475600	1975200	-1	0	0	0	0.97	0.97	1	0.97	0	0	0	0	1	1	2	2	0	0	0	0
Methylsterol monooxygenase OS=Saccharomyces cerevisiae (strain ATCC 204508 / S288c) OX=559292 GN=ERG25 PE=1 SV=1	P53045	ERG25	36 kDa		unknown	0	773010	4214000	4384300	-1	3948100	-1	-1	0	0.97	1	1	0	0.97	0	0	0	1	2	2	0	1	0	0
Mediator of RNA polymerase II transcription subunit 20 OS=Saccharomyces cerevisiae (strain ATCC 204508 / S288c) OX=559292 GN=SRB2 PE=1 SV=1	P34162	SRB2	23 kDa		unknown	1850200	2144600	992930	892330	-1	0	-1	0	1	1	0.98	0.97	0	0	0	0	2	2	1	1	0	0	0	0
Exocyst complex component SEC5 OS=Saccharomyces cerevisiae (strain ATCC 204508 / S288c) OX=559292 GN=SEC5 PE=1 SV=1	P89102	SEC5	112 kDa		unknown	262820	107090	135970	62728	0	0	-1	0	1	0.97	1	0.97	0	0	0	0	2	1	2	1	0	0	0	0
Ribosome quality control complex subunit 2 OS=Saccharomyces cerevisiae (strain ATCC 204508 / S288c) OX=559292 GN=RQC2 PE=1 SV=1	Q12532	RQC2	119 kDa		unknown	197920	84430	155670	235530	0	0	0	0	1	0.97	0.98	1	0	0	0	0	2	1	1	2	0	0	0	0
37S ribosomal protein S25, mitochondrial OS=Saccharomyces cerevisiae (strain ATCC 204508 / S288c) OX=559292 GN=RSM25 PE=1 SV=1	P40496	RSM25	31 kDa		unknown	672250	1359200	512040	1184000	0	0	-1	0	0.97	1	0.98	1	0	0	0	0	1	2	1	2	0	0	0	0
U3 small nucleolar RNA-associated protein 11 OS=Saccharomyces cerevisiae (strain ATCC 204508 / S288c) OX=559292 GN=UTP11 PE=1 SV=2	P34247	UTP11	30 kDa		unknown	2750500	1665000	1309000	991960	-1	0	-1	0	1	1	0.98	0.97	0	0	0	0	2	2	1	1	0	0	0	0
Ribosomal lysine N-methyltransferase 3 OS=Saccharomyces cerevisiae (strain ATCC 204508 / S288c) OX=559292 GN=RKM3 PE=1 SV=1	P38222	RKM3	63 kDa		unknown	933170	574680	556610	423830	0	0	0	0	1	1	0.98	0.97	0	0	0	0	2	2	1	1	0	0	0	0
GTP-binding protein RHO1 OS=Saccharomyces cerevisiae (strain ATCC 204508 / S288c) OX=559292 GN=RHO1 PE=1 SV=3	P06780	RHO1	23 kDa		unknown	3262600	2474900	3973800	7120300	-1	0	-1	-1	1	0.97	0.98	1	0	0	0	0	2	1	1	2	0	0	0	0
Peptidyl-prolyl cis-trans isomerase OS=Saccharomyces cerevisiae (strain ATCC 204508 / S288c) OX=559292 GN=CPR1 PE=1 SV=3	P14832	CPR1	17 kDa		unknown	3809800	1565900	1976800	4587500	-1	-1	-1	0	1	0.97	0.98	1	0	0	0	0	2	1	1	2	0	0	0	0
Vacuolar protein sorting-associated protein 29 OS=Saccharomyces cerevisiae (strain ATCC 204508 / S288c) OX=559292 GN=VPS29 PE=1 SV=1	P38759	VPS29	31 kDa		unknown	1219900	586590	953870	1425400	0	0	-1	-1	1	0.97	0.98	1	0	0	0	0	2	1	1	2	0	0	0	0
High-affinity methionine permease OS=Saccharomyces cerevisiae (strain ATCC 204508 / S288c) OX=559292 GN=MUP1 PE=1 SV=1	P50276	MUP1	63 kDa		unknown	1215300	3009600	2831300	1696700	-1	-1	0	-1	0.97	1	1	0.97	0	0	0	0	1	2	2	1	0	0	0	0
[PIN+] prion protein RNQ1 OS=Saccharomyces cerevisiae (strain ATCC 204508 / S288c) OX=559292 GN=RNQ1 PE=1 SV=2	P25367	RNQ1	43 kDa		unknown	4904100	3173600	5248700	4796500	0	-1	-1	-1	0.97	0.97	1	1	0	0	0	0	1	1	2	2	0	0	0	0
MICOS complex subunit MIC10 OS=Saccharomyces cerevisiae (strain ATCC 204508 / S288c) OX=559292 GN=MIC10 PE=1 SV=1	Q96VH5	MIC10	10 kDa		unknown	2202100	1745500	6561800	7428200	-1	-1	-1	-1	0.97	0.97	1	1	0	0	0	0	1	1	2	2	0	0	0	0
ER membrane protein complex subunit 5 OS=Saccharomyces cerevisiae (strain ATCC 204508 / S288c) OX=559292 GN=EMC5 PE=1 SV=1	P40540	EMC5	16 kDa		unknown	303370	160000	2177600	2504900	-1	-1	-1	-1	0.97	0.97	1	1	0	0	0	0	1	1	2	2	0	0	0	0
Vacuolar import and degradation protein 27 OS=Saccharomyces cerevisiae (strain ATCC 204508 / S288c) OX=559292 GN=VID27 PE=1 SV=1	P40157	VID27	89 kDa		unknown	107550	0	85517	628820	0	0	0	0	0.97	0.97	0.98	1	0	0	0	0	1	1	1	3	0	0	0	0
Nucleolar protein 6 OS=Saccharomyces cerevisiae (strain ATCC 204508 / S288c) OX=559292 GN=NOP6 PE=1 SV=1	Q07623	NOP6	25 kDa		unknown	1990400	2336600	3212500	4884600	-1	-1	-1	0	0.97	0.97	0.98	1	0	0	0	0	1	1	1	2	0	0	0	0
Glucose-6-phosphate 1-dehydrogenase OS=Saccharomyces cerevisiae (strain ATCC 204508 / S288c) OX=559292 GN=ZWF1 PE=1 SV=4	P11412	ZWF1	58 kDa		unknown	84060	115600	80897	349360	0	0	0	0	0.97	0.97	0.98	1	0	0	0	0	1	1	1	3	0	0	0	0
Assembly chaperone of RPL4 OS=Saccharomyces cerevisiae (strain ATCC 204508 / S288c) OX=559292 GN=ACL4 PE=1 SV=1	Q03771	ACL4	43 kDa		unknown	290680	790210	1396300	508850	-1	0	-1	0	0.93	1	1	0.97	0	0	0	0	1	2	2	1	0	0	0	0
Serine/threonine-protein kinase RIO2 OS=Saccharomyces cerevisiae (strain ATCC 204508 / S288c) OX=559292 GN=RIO2 PE=1 SV=1	P40160	RIO2	49 kDa		unknown	0	1114600	734230	741630	0	0	1145000	0	0	1	0.98	1	0	0	0.9	0	0	2	1	2	0	0	1	0
54S ribosomal protein L31, mitochondrial OS=Saccharomyces cerevisiae (strain ATCC 204508 / S288c) OX=559292 GN=MRPL31 PE=1 SV=1	P14063	MRPL31	16 kDa		unknown	1505700	1805400	482470	2243500	-1	-1	-1	0	1	1	0.98	0.87	0	0	0	0	2	2	1	1	0	0	0	0
Glycolipid 2-alpha-mannosyltransferase OS=Saccharomyces cerevisiae (strain ATCC 204508 / S288c) OX=559292 GN=KRE2 PE=1 SV=1	P27809	KRE2	51 kDa		unknown	56366	298700	0	1036100	-1	0	-1	-1	0.82	0.97	0.98	1	0	0	0	0	1	1	1	3	0	0	0	0
AP-1 complex subunit beta-1 OS=Saccharomyces cerevisiae (strain ATCC 204508 / S288c) OX=559292 GN=APL2 PE=1 SV=1	P36000	APL2	82 kDa		unknown	134090	429290	172080	82219	0	0	-1	0	0.97	1	0.98	0.82	0	0	0	0	1	3	1	1	0	0	0	0
DNA-directed RNA polymerase III subunit RPC6 OS=Saccharomyces cerevisiae (strain ATCC 204508 / S288c) OX=559292 GN=RPC34 PE=1 SV=1	P32910	RPC34	36 kDa		unknown	247380	360080	453450	352070	0	0	-1	0	0.97	1	0.76	1	0	0	0	0	1	2	1	2	0	0	0	0
Serine/threonine-protein kinase TOR1 OS=Saccharomyces cerevisiae (strain ATCC 204508 / S288c) OX=559292 GN=TOR1 PE=1 SV=3	P35169	TOR1	281 kDa		unknown	45848	9001.7	43465	0	0	0	0	0	1	0.97	1	0	0	0	0.58	0	2	1	2	0	0	0	0	0
Phosphoribosylformylglycinamidine synthase OS=Saccharomyces cerevisiae (strain ATCC 204508 / S288c) OX=559292 GN=ADE6 PE=1 SV=2	P38972	ADE6	149 kDa		unknown	105440	58592	22769	20515	0	0	0	-1	1	1	0.5	0.97	0.05	0	0	0	2	2	1	1	0	0	0	0
Uncharacterized protein YLR287C OS=Saccharomyces cerevisiae (strain ATCC 204508 / S288c) OX=559292 GN=YLR287C PE=1 SV=1	Q05881	YLR287C	41 kDa		unknown	423790	255990	421490	182000	0	-1	0	-1	1	0.61	1	0.91	0	0	0	0	2	1	2	1	0	0	0	0
D-arabinono-1,4-lactone oxidase OS=Saccharomyces cerevisiae (strain ATCC 204508 / S288c) OX=559292 GN=ALO1 PE=1 SV=1	P54783	ALO1	59 kDa		unknown	323890	467520	200780	0	-1	0	-1	0	1	0.97	0.72	0.45	0	0	0	0	3	1	1	1	0	0	0	0
Chorismate synthase OS=Saccharomyces cerevisiae (strain ATCC 204508 / S288c) OX=559292 GN=ARO2 PE=1 SV=1	P28777	ARO2	41 kDa		unknown	0	719710	-1	356860	0	1311600	0	0	0.15	1	0	0.97	0	1	0	0	0	2	0	1	0	1	0	0
54S ribosomal protein L1, mitochondrial OS=Saccharomyces cerevisiae (strain ATCC 204508 / S288c) OX=559292 GN=MRPL1 PE=1 SV=1	Q04599	MRPL1	31 kDa		unknown	0	788720	826300	550220	0	0	0	0	0.11	1	0.98	0.97	0	0	0	0	0	2	1	1	0	0	0	0
Translocation protein SEC62 OS=Saccharomyces cerevisiae (strain ATCC 204508 / S288c) OX=559292 GN=SEC62 PE=1 SV=2	P21825	SEC62	31 kDa		unknown	767440	-1	2875300	3156600	-1	0	-1	0	1	0	1	1	0	0	0	0	2	0	2	2	0	0	0	0
Succinate dehydrogenase [ubiquinone] iron-sulfur subunit, mitochondrial OS=Saccharomyces cerevisiae (strain ATCC 204508 / S288c) OX=559292 GN=SDH2 PE=1 SV=1	P21801	SDH2	30 kDa		unknown	573650	860330	0	926080	-1	-1	-1	-1	1	1	0	1	0	0	0	0	2	2	0	2	0	0	0	0
Uncharacterized mitochondrial carrier YPR011C OS=Saccharomyces cerevisiae (strain ATCC 204508 / S288c) OX=559292 GN=YPR011C PE=1 SV=1	Q12251	YPR011C	36 kDa		unknown	159740	665130	294260	0	0	-1	-1	-1	1	1	0.98	0	0	0	0	0	2	3	1	0	0	0	0	0
SEC14 cytosolic factor OS=Saccharomyces cerevisiae (strain ATCC 204508 / S288c) OX=559292 GN=SEC14 PE=1 SV=3	P24280	SEC14	35 kDa		unknown	393420	884030	-1	1663300	0	0	-1	-1	0.97	1	0	1	0	0	0	0	1	2	0	3	0	0	0	0
Antiviral protein SKI8 OS=Saccharomyces cerevisiae (strain ATCC 204508 / S288c) OX=559292 GN=SKI8 PE=1 SV=1	Q02793	SKI8	44 kDa		unknown	1467500	563000	1283900	465450	-1	0	-1	-1	1	0.47	1	0.48	0	0	0	0	2	1	2	1	0	0	0	0
Zinc/cadmium resistance protein OS=Saccharomyces cerevisiae (strain ATCC 204508 / S288c) OX=559292 GN=ZRC1 PE=1 SV=2	P20107	ZRC1	48 kDa		unknown	1017900	-1	4201700	4607700	-1	-1	-1	-1	0.97	0	0.98	1	0	0	0	0	1	0	2	3	0	0	0	0
Protein arginine N-methyltransferase 1 OS=Saccharomyces cerevisiae (strain ATCC 204508 / S288c) OX=559292 GN=HMT1 PE=1 SV=1	P38074	HMT1	40 kDa		unknown	1223600	-1	1445900	875280	0	-1	-1	0	0.91	0	1	1	0	0	0	0	1	0	2	3	0	0	0	0
Uncharacterized protein RSN1 OS=Saccharomyces cerevisiae (strain ATCC 204508 / S288c) OX=559292 GN=RSN1 PE=1 SV=1	Q03516	RSN1	108 kDa		unknown	622180	377990	523010	305050	0	0	0	0	1	0.32	0.66	0.9	0	0	0	0	3	1	1	1	0	0	0	0
Leu/Val/Ile amino-acid permease OS=Saccharomyces cerevisiae (strain ATCC 204508 / S288c) OX=559292 GN=BAP2 PE=1 SV=2	P38084	BAP2	68 kDa	TRUE	unknown	-1	665650	443280	1233000	0	0	-1	-1	0	1	0.5	1	0	0	0	0	0	2	1	3	0	0	0	0
Nucleoporin NUP53 OS=Saccharomyces cerevisiae (strain ATCC 204508 / S288c) OX=559292 GN=NUP53 PE=1 SV=1	Q03790	NUP53	53 kDa		unknown	0	158750	1041300	1531000	0	0	-1	-1	0	0.47	0.97	1	0	0	0	0	0	1	2	3	0	0	0	0
Cytochrome c oxidase subunit 4, mitochondrial OS=Saccharomyces cerevisiae (strain ATCC 204508 / S288c) OX=559292 GN=COX4 PE=1 SV=1	P04037	COX4	17 kDa		unknown	0	-1	7178400	21288000	-1	-1	-1	-1	0	0	1	1	0	0	0	0	0	0	2	4	0	0	0	0
Cytochrome B pre-mRNA-processing protein 2 OS=Saccharomyces cerevisiae (strain ATCC 204508 / S288c) OX=559292 GN=CBP2 PE=1 SV=2	P03874	CBP2	74 kDa		unknown	0	434890	251900	142130	0	0	0	0	0.97	1	0.98	0.97	0.09	0	0	0	1	2	1	1	0	0	0	0
Farnesyl pyrophosphate synthase OS=Saccharomyces cerevisiae (strain ATCC 204508 / S288c) OX=559292 GN=ERG20 PE=1 SV=2	P08524	ERG20	40 kDa		unknown	251590	230440	327340	543860	-1	-1	0	-1	0.97	0.97	0.98	1	0	0	0	0	1	1	1	2	0	0	0	0
Probable E3 ubiquitin-protein ligase HUL5 OS=Saccharomyces cerevisiae (strain ATCC 204508 / S288c) OX=559292 GN=HUL5 PE=1 SV=1	P53119	HUL5	106 kDa		unknown	118690	75765	115180	53991	0	0	0	0	1	0.97	0.98	0.97	0	0	0	0	2	1	1	1	0	0	0	0
Protein transport protein SEC24 OS=Saccharomyces cerevisiae (strain ATCC 204508 / S288c) OX=559292 GN=SEC24 PE=1 SV=1	P40482	SEC24	104 kDa		unknown	290950	104750	230230	174460	0	-1	0	-1	1	0.97	0.98	0.97	0	0	0	0	2	1	1	1	0	0	0	0
Eukaryotic translation initiation factor 2 subunit alpha OS=Saccharomyces cerevisiae (strain ATCC 204508 / S288c) OX=559292 GN=SUI2 PE=1 SV=1	P20459	SUI2	35 kDa		unknown	841530	719720	1198200	1676000	0	0	0	-1	0.97	0.97	0.98	1	0	0	0	0	1	1	1	2	0	0	0	0
Saccharopepsin OS=Saccharomyces cerevisiae (strain ATCC 204508 / S288c) OX=559292 GN=PEP4 PE=1 SV=1	P07267	PEP4	45 kDa		unknown	362910	858920	575450	763130	-1	0	-1	-1	0.97	1	0.98	0.97	0	0	0	0	1	2	1	1	0	0	0	0
Ribonuclease P protein component, mitochondrial OS=Saccharomyces cerevisiae (strain ATCC 204508 / S288c) OX=559292 GN=RPM2 PE=1 SV=1	Q02773	RPM2	139 kDa		unknown	36768	131010	112220	52407	0	-1	0	0	0.97	1	0.98	0.97	0	0	0	0	1	2	1	1	0	0	0	0
Uracil phosphoribosyltransferase OS=Saccharomyces cerevisiae (strain ATCC 204508 / S288c) OX=559292 GN=FUR1 PE=1 SV=2	P18562	FUR1	25 kDa		unknown	209740	221120	334570	1206700	-1	-1	-1	-1	0.97	0.97	0.98	1	0	0	0	0	1	1	1	2	0	0	0	0
IML2-like protein YKR018C OS=Saccharomyces cerevisiae (strain ATCC 204508 / S288c) OX=559292 GN=YKR018C PE=1 SV=1	P36114	YKR018C	82 kDa		unknown	102640	41427	99465	440350	0	0	-1	0	0.97	0.97	0.98	1	0	0	0	0	1	1	1	2	0	0	0	0
Cell wall protein ECM33 OS=Saccharomyces cerevisiae (strain ATCC 204508 / S288c) OX=559292 GN=ECM33 PE=1 SV=3	P38248	ECM33	44 kDa		unknown	5128500	4932300	11588000	14926000	-1	-1	0	-1	0.97	0.97	0.98	1	0	0	0	0	1	1	1	2	0	0	0	0
DNA-directed RNA polymerase III subunit RPC8 OS=Saccharomyces cerevisiae (strain ATCC 204508 / S288c) OX=559292 GN=RPC25 PE=1 SV=1	P35718	RPC25	24 kDa		unknown	1575400	253450	476870	1291200	-1	-1	-1	-1	1	0.97	0.98	0.97	0	0	0	0	2	1	1	1	0	0	0	0
Cytochrome c isoform 1 OS=Saccharomyces cerevisiae (strain ATCC 204508 / S288c) OX=559292 GN=CYC1 PE=1 SV=2	P00044	CYC1	12 kDa		unknown	275010	261140	2900400	254230	-1	-1	0	0	0.97	0.97	1	0.97	0	0	0	0	1	1	2	1	0	0	0	0
Ubiquitin-conjugating enzyme E2 4 OS=Saccharomyces cerevisiae (strain ATCC 204508 / S288c) OX=559292 GN=UBC4 PE=1 SV=1	P15731	UBC4	16 kDa		unknown	3117200	5321400	3206200	5379100	-1	-1	-1	-1	0.97	0.97	1	0.97	0	0	0	0	1	1	2	1	0	0	0	0
Cell membrane protein YLR413W OS=Saccharomyces cerevisiae (strain ATCC 204508 / S288c) OX=559292 GN=YLR413W PE=1 SV=1	Q06689	YLR413W	73 kDa		unknown	350990	149780	1163900	345080	0	-1	-1	0	0.97	0.97	1	0.97	0	0	0	0	1	1	2	1	0	0	0	0
Chitin synthase regulator SKT5 OS=Saccharomyces cerevisiae (strain ATCC 204508 / S288c) OX=559292 GN=SKT5 PE=1 SV=1	P34226	SKT5	77 kDa		unknown	200990	166050	0	501840	0	320160	-1	-1	0.97	0.97	0	1	0	0.97	0	0	1	1	0	2	0	1	0	0
Bud site selection protein 21 OS=Saccharomyces cerevisiae (strain ATCC 204508 / S288c) OX=559292 GN=BUD21 PE=1 SV=1	Q08492	BUD21	24 kDa		unknown	407340	1050800	1428800	409550	0	0	0	0	0.97	0.97	1	0.96	0	0	0	0	1	1	2	1	0	0	0	0
E3 ubiquitin-protein ligase DMA1 OS=Saccharomyces cerevisiae (strain ATCC 204508 / S288c) OX=559292 GN=DMA1 PE=1 SV=1	P38823	DMA1	46 kDa		unknown	523830	484550	547760	482170	-1	0	-1	0	0.96	1	0.98	0.97	0	0	0	0	1	2	1	1	0	0	0	0
2-(3-amino-3-carboxypropyl)histidine synthase subunit 1 OS=Saccharomyces cerevisiae (strain ATCC 204508 / S288c) OX=559292 GN=DPH1 PE=1 SV=1	P40487	DPH1	48 kDa		unknown	296200	571480	0	0	-1	713230	0	0	0.97	1	0	0	0	0.97	0.97	0	1	2	0	0	0	1	1	0
Citrate synthase, mitochondrial OS=Saccharomyces cerevisiae (strain ATCC 204508 / S288c) OX=559292 GN=CIT1 PE=1 SV=2	P00890	CIT1	53 kDa		unknown	157680	371020	366170	0	0	0	-1	0	0.92	1	0.98	0.97	0	0	0	0	1	2	1	1	0	0	0	0
Proteasome subunit beta type-7 OS=Saccharomyces cerevisiae (strain ATCC 204508 / S288c) OX=559292 GN=PRE4 PE=1 SV=1	P30657	PRE4	29 kDa		unknown	1037300	1371400	1003200	1192500	-1	-1	-1	-1	0.97	1	0.98	0.9	0	0	0	0	1	2	1	1	0	0	0	0
Transcription elongation factor S-II OS=Saccharomyces cerevisiae (strain ATCC 204508 / S288c) OX=559292 GN=DST1 PE=1 SV=4	P07273	DST1	35 kDa		unknown	1605800	1917600	1954500	2189900	-1	-1	-1	0	0.91	0.91	0.92	1	0	0	0	0	1	1	1	2	0	0	0	0
Protein NSG1 OS=Saccharomyces cerevisiae (strain ATCC 204508 / S288c) OX=559292 GN=NSG1 PE=1 SV=1	P38837	NSG1	32 kDa		unknown	2880100	3001800	3593400	3624200	-1	-1	0	-1	1	0.91	0.92	0.91	0	0	0	0	2	1	1	1	0	0	0	0
Hsp90 co-chaperone AHA1 OS=Saccharomyces cerevisiae (strain ATCC 204508 / S288c) OX=559292 GN=AHA1 PE=1 SV=1	Q12449	AHA1	39 kDa		unknown	141720	192460	290620	237170	0	0	0	0	0.91	0.91	1	0.91	0	0	0	0	1	1	2	1	0	0	0	0
Respiratory supercomplex factor 1, mitochondrial OS=Saccharomyces cerevisiae (strain ATCC 204508 / S288c) OX=559292 GN=RCF1 PE=1 SV=1	Q03713	RCF1	18 kDa		unknown	1300500	1309500	4676600	2149900	-1	-1	0	-1	0.62	0.99	1	0.91	0	0	0	0	1	1	2	1	0	0	0	0
Protein SPP41 OS=Saccharomyces cerevisiae (strain ATCC 204508 / S288c) OX=559292 GN=SPP41 PE=1 SV=2	P38904	SPP41	162 kDa		unknown	0	87754	435.37	91437	0	0	0	0	0.97	0.91	0.48	1	0	0	0	0	1	1	1	2	0	0	0	0
Protein PBDC1 homolog OS=Saccharomyces cerevisiae (strain ATCC 204508 / S288c) OX=559292 GN=YPL225W PE=1 SV=1	Q08971	YPL225W	17 kDa		unknown	820830	374840	1548300	1011200	-1	-1	-1	-1	0.97	0.92	1	0.48	0	0	0	0	1	1	2	1	0	0	0	0
Ubiquitin-like-specific protease 1 OS=Saccharomyces cerevisiae (strain ATCC 204508 / S288c) OX=559292 GN=ULP1 PE=1 SV=1	Q02724	ULP1	72 kDa		unknown	254960	141450	206940	-1	0	480040000	0	0	0.97	1	0.98	0	0	0.41	0	0	1	2	1	0	0	1	0	0
Cytochrome B pre-mRNA-processing protein 6 OS=Saccharomyces cerevisiae (strain ATCC 204508 / S288c) OX=559292 GN=CBP6 PE=1 SV=1	P07253	CBP6	19 kDa		unknown	890730	1791500	0	941100	0	0	-1	0	0.97	1	0.5	0.82	0	0	0	0	1	2	1	1	0	0	0	0
Conserved oligomeric Golgi complex subunit 3 OS=Saccharomyces cerevisiae (strain ATCC 204508 / S288c) OX=559292 GN=COG3 PE=1 SV=1	P40094	COG3	93 kDa		unknown	0	186370	30138	86509	0	0	-1	0	0	0.99	0.98	0.98	0	0	0	0.23	0	2	1	1	0	0	0	0
Chromatin structure-remodeling complex subunit SFH1 OS=Saccharomyces cerevisiae (strain ATCC 204508 / S288c) OX=559292 GN=SFH1 PE=1 SV=1	Q06168	SFH1	49 kDa		unknown	1059400	154120	605920	0	-1	-1	0	0	1	0.97	0.98	0.13	0	0	0	0	3	1	1	0	0	0	0	0
AP-3 complex subunit beta OS=Saccharomyces cerevisiae (strain ATCC 204508 / S288c) OX=559292 GN=APL6 PE=1 SV=2	P46682	APL6	92 kDa		unknown	166480	119200	40562	0	0	0	0	0	1	1	0.98	0	0	0	0	0	2	2	1	0	0	0	0	0
NADP-dependent 3-hydroxy acid dehydrogenase OS=Saccharomyces cerevisiae (strain ATCC 204508 / S288c) OX=559292 GN=YMR226C PE=1 SV=1	Q05016	YMR226C	29 kDa		unknown	292580	0	0	0	0	0	-1	0	1	0.97	0.89	0	0.14	0	0	0	2	1	1	0	0	0	0	0
DNA polymerase alpha catalytic subunit A OS=Saccharomyces cerevisiae (strain ATCC 204508 / S288c) OX=559292 GN=POL1 PE=1 SV=2	P13382	POL1	167 kDa		unknown	0	90844	122200	0	0	0	0	0	0	1	1	0.97	0	0	0	0	0	2	2	1	0	0	0	0
Eukaryotic translation initiation factor 3 subunit J OS=Saccharomyces cerevisiae (strain ATCC 204508 / S288c) OX=559292 GN=HCR1 PE=1 SV=1	Q05775	HCR1	30 kDa		unknown	2350400	0	628220	1233100	0	0	0	0	1	0	1	0.97	0	0	0	0	2	0	2	1	0	0	0	0
Transcriptional regulatory protein GAT1 OS=Saccharomyces cerevisiae (strain ATCC 204508 / S288c) OX=559292 GN=GAT1 PE=1 SV=1	P43574	GAT1	56 kDa		unknown	1090100	349000	0	851610	0	-1	0	-1	1	0.97	0.07	0.94	0	0	0	0	2	1	0	1	0	0	0	0
Cluster of Y' element ATP-dependent helicase protein 1 copy 2 OS=Saccharomyces cerevisiae (strain ATCC 204508 / S288c) OX=559292 GN=YRF1-2 PE=2 SV=2 (P40105)	P40105 [4]	YRF1-2	191 kDa	TRUE	unknown	54630	39056	0	0	0	0	0	0	1	1	0	0.97	0	0	0	0	2	2	0	1	0	0	0	0
Mitochondrial nicotinamide adenine dinucleotide transporter 2 OS=Saccharomyces cerevisiae (strain ATCC 204508 / S288c) OX=559292 GN=YEA6 PE=1 SV=1	P39953	YEA6	37 kDa		unknown	190250	66000	0	214550	0	0	0	-1	1	0.97	0	1	0	0	0	0	1	1	0	2	0	0	0	0
Protein SSO2 OS=Saccharomyces cerevisiae (strain ATCC 204508 / S288c) OX=559292 GN=SSO2 PE=1 SV=2	P39926	SSO2	34 kDa		unknown	464000	-1	1668700	1360900	-1	-1	0	0	1	0	0.98	1	0	0	0	0	1	0	1	2	0	0	0	0
Cell division control protein 3 OS=Saccharomyces cerevisiae (strain ATCC 204508 / S288c) OX=559292 GN=CDC3 PE=1 SV=3	P32457	CDC3	60 kDa		unknown	346230	-1	199990	132550	-1	-1	-1	-1	1	0	0.98	1	0	0	0	0	2	0	1	2	0	0	0	0
Mitochondrial transcription factor 2 OS=Saccharomyces cerevisiae (strain ATCC 204508 / S288c) OX=559292 GN=MTF2 PE=1 SV=1	P10849	MTF2	51 kDa		unknown	315070	392240	449960	-1	0	-1	-1	-1	0.97	1	1	0	0	0	0	0	1	2	2	0	0	0	0	0
DnaJ protein homolog XDJ1 OS=Saccharomyces cerevisiae (strain ATCC 204508 / S288c) OX=559292 GN=XDJ1 PE=1 SV=2	P39102	XDJ1	51 kDa		unknown	486380	999340	-1	598540	-1	-1	0	-1	0.97	1	0	1	0	0	0	0	1	2	0	2	0	0	0	0
GTP-binding protein RHO3 OS=Saccharomyces cerevisiae (strain ATCC 204508 / S288c) OX=559292 GN=RHO3 PE=1 SV=2	Q00245	RHO3	25 kDa		unknown	0	963480	1257200	392590	-1	-1	-1	-1	0	1	1	0.97	0	0	0	0	0	2	2	1	0	0	0	0
tRNA (adenine(58)-N(1))-methyltransferase catalytic subunit TRM61 OS=Saccharomyces cerevisiae (strain ATCC 204508 / S288c) OX=559292 GN=GCD14 PE=1 SV=1	P46959	GCD14	44 kDa		unknown	168750	-1	0	248310	-1	-1	-1	0	1	0	1	0.97	0	0	0	0	2	0	2	1	0	0	0	0
Ferric/cupric reductase transmembrane component 1 OS=Saccharomyces cerevisiae (strain ATCC 204508 / S288c) OX=559292 GN=FRE1 PE=1 SV=1	P32791	FRE1	79 kDa		unknown	0	166260	383610	461540	0	0	0	0	0	0.97	1	1	0	0	0	0	0	1	2	2	0	0	0	0
Exocyst complex component SEC6 OS=Saccharomyces cerevisiae (strain ATCC 204508 / S288c) OX=559292 GN=SEC6 PE=1 SV=2	P32844	SEC6	93 kDa		unknown	152430	70331	182450	0	0	0	0	-1	1	0.97	1	0	0	0	0	0	2	1	2	0	0	0	0	0
Vacuolar import and degradation protein 22 OS=Saccharomyces cerevisiae (strain ATCC 204508 / S288c) OX=559292 GN=VID22 PE=1 SV=1	Q05934	VID22	103 kDa		unknown	0	148090	447450	197820	0	0	-1	0	0	0.97	1	1	0	0	0	0	0	1	3	1	0	0	0	0
DNA primase large subunit OS=Saccharomyces cerevisiae (strain ATCC 204508 / S288c) OX=559292 GN=PRI2 PE=1 SV=1	P20457	PRI2	62 kDa		unknown	167150	0	146430	209990	0	0	-1	0	1	0	0.98	0.99	0	0	0	0	2	0	1	2	0	0	0	0
Valine amino-acid permease OS=Saccharomyces cerevisiae (strain ATCC 204508 / S288c) OX=559292 GN=BAP3 PE=1 SV=2	P41815	BAP3	67 kDa	TRUE	unknown	0	36820	333300	306610	-1	0	-1	-1	0	0.97	1	1	0	0	0	0	0	1	2	2	0	0	0	0
Alkylphosphocholine resistance protein LEM3 OS=Saccharomyces cerevisiae (strain ATCC 204508 / S288c) OX=559292 GN=LEM3 PE=1 SV=1	P42838	LEM3	47 kDa		unknown	0	112920	1005200	1852300	-1	0	-1	0	0	0.97	0.98	1	0	0	0	0	0	1	1	3	0	0	0	0
Aspartate aminotransferase, cytoplasmic OS=Saccharomyces cerevisiae (strain ATCC 204508 / S288c) OX=559292 GN=AAT2 PE=1 SV=3	P23542	AAT2	46 kDa		unknown	204070	-1	827700	91413	0	-1	-1	-1	0.97	0	1	0.97	0	0	0	0	1	0	3	1	0	0	0	0
General negative regulator of transcription subunit 4 OS=Saccharomyces cerevisiae (strain ATCC 204508 / S288c) OX=559292 GN=MOT2 PE=1 SV=1	P34909	MOT2	65 kDa		unknown	684600	749950	-1	1038100	-1	-1	0	0	0.97	0.97	0	1	0	0	0	0	1	1	0	3	0	0	0	0
Origin recognition complex subunit 4 OS=Saccharomyces cerevisiae (strain ATCC 204508 / S288c) OX=559292 GN=ORC4 PE=1 SV=1	P54791	ORC4	61 kDa		unknown	-1	120280	116440	240440	0	0	0	-1	0	0.97	0.98	1	0	0	0	0	0	1	1	3	0	0	0	0
CDP-diacylglycerol--serine O-phosphatidyltransferase OS=Saccharomyces cerevisiae (strain ATCC 204508 / S288c) OX=559292 GN=CHO1 PE=1 SV=3	P08456	CHO1	31 kDa		unknown	218140	-1	428770	606970	-1	-1	-1	-1	0.97	0	1	0.97	0	0	0	0	1	0	3	1	0	0	0	0
Mitochondrial peculiar membrane protein 1 OS=Saccharomyces cerevisiae (strain ATCC 204508 / S288c) OX=559292 GN=MPM1 PE=1 SV=1	P40364	MPM1	28 kDa		unknown	339350	492480	382990	199710	-1	-1	-1	-1	0.97	1	0.58	0.29	0	0	0	0	1	2	1	1	0	0	0	0
Proteasome subunit beta type-6 OS=Saccharomyces cerevisiae (strain ATCC 204508 / S288c) OX=559292 GN=PRE7 PE=1 SV=1	P23724	PRE7	27 kDa		unknown	0	351250	1495200	940260	-1	-1	-1	-1	0	0.79	1	1	0	0	0	0	0	1	2	2	0	0	0	0
Dicarboxylic amino acid permease OS=Saccharomyces cerevisiae (strain ATCC 204508 / S288c) OX=559292 GN=DIP5 PE=1 SV=1	P53388	DIP5	68 kDa		unknown	1873700	485670	813010	-1	-1	-1	-1	0	0.68	1	1	0	0	0	0	0	1	2	2	0	0	0	0	0
Ornithine decarboxylase OS=Saccharomyces cerevisiae (strain ATCC 204508 / S288c) OX=559292 GN=SPE1 PE=1 SV=1	P08432	SPE1	52 kDa		unknown	-1	244890	584360	0	0	0	-1	0	0	1	1	0.62	0	0	0	0	0	2	2	0	0	0	0	0
General negative regulator of transcription subunit 2 OS=Saccharomyces cerevisiae (strain ATCC 204508 / S288c) OX=559292 GN=CDC36 PE=1 SV=1	P06100	CDC36	22 kDa		unknown	1488200	3656100	1640000	1625300	-1	0	0	0	0.48	1	0.5	0.48	0	0	0.07	0.06	1	2	1	1	0	0	0	0
Nucleosome assembly protein OS=Saccharomyces cerevisiae (strain ATCC 204508 / S288c) OX=559292 GN=NAP1 PE=1 SV=2	P25293	NAP1	48 kDa		unknown	927100	724060	0	1156600	-1	-1	-1	-1	0.97	1	0.25	0.38	0	0	0	0	1	2	0	1	0	0	0	0
Cluster of Lysine-specific permease OS=Saccharomyces cerevisiae (strain ATCC 204508 / S288c) OX=559292 GN=LYP1 PE=1 SV=2 (P32487)	P32487 [2]	LYP1	68 kDa	TRUE	unknown	0	2014500	0	0	-1	0	-1	-1	0	1	1	0.48	0	0	0	0	0	2	2	1	0	0	0	0
Factor arrest protein 8 OS=Saccharomyces cerevisiae (strain ATCC 204508 / S288c) OX=559292 GN=FAR8 PE=1 SV=1	Q05040	FAR8	59 kDa		unknown	353580	121580	176410	0	-1	-1	-1	0	1	1	0.5	0	0	0	0	0	2	2	1	0	0	0	0	0
37S ribosomal protein MRP2, mitochondrial OS=Saccharomyces cerevisiae (strain ATCC 204508 / S288c) OX=559292 GN=MRP2 PE=1 SV=1	P10663	MRP2	14 kDa		unknown	2682300	3765500	2889000	-1	-1	-1	-1	-1	0.48	1	0.99	0	0	0	0	0	1	2	2	0	0	0	0	0
Serine/threonine-protein phosphatase 4 regulatory subunit 3 OS=Saccharomyces cerevisiae (strain ATCC 204508 / S288c) OX=559292 GN=PSY2 PE=1 SV=1	P40164	PSY2	98 kDa		unknown	214880	0	434230	120360	0	0	0	-1	1	0.08	0.39	1	0	0	0	0	2	0	1	2	0	0	0	0
Protein BOB1 OS=Saccharomyces cerevisiae (strain ATCC 204508 / S288c) OX=559292 GN=BOI1 PE=1 SV=1	P38041	BOI1	109 kDa	TRUE	unknown	125740	75479	56989	0	0	0	0	0	1	1	0.43	0	0	0	0	0	2	2	1	0	0	0	0	0
54S ribosomal protein L16, mitochondrial OS=Saccharomyces cerevisiae (strain ATCC 204508 / S288c) OX=559292 GN=MRPL16 PE=1 SV=1	P38064	MRPL16	27 kDa		unknown	1129600	0	1378900	264300	0	0	-1	-1	0.34	0	1	0.97	0	0	0	0	1	0	2	2	0	0	0	0
Signal recognition particle receptor subunit alpha homolog OS=Saccharomyces cerevisiae (strain ATCC 204508 / S288c) OX=559292 GN=SRP101 PE=1 SV=2	P32916	SRP101	69 kDa		unknown	576680	0	821640	0	0	0	216090	0	1	0	1	0	0	0	0.25	0	2	0	2	0	0	0	1	0
54S ribosomal protein L41, mitochondrial OS=Saccharomyces cerevisiae (strain ATCC 204508 / S288c) OX=559292 GN=MRP20 PE=1 SV=1	P32387	MRP20	31 kDa		unknown	646210	0	0	1342600	-1	0	-1	0	1	0.16	0	1	0	0	0	0	2	0	0	2	0	0	0	0
Nucleoporin NSP1 OS=Saccharomyces cerevisiae (strain ATCC 204508 / S288c) OX=559292 GN=NSP1 PE=1 SV=1	P14907	NSP1	87 kDa		unknown	0	0	88054	336540	0	0	0	0	0	0.11	1	0.99	0	0	0	0	0	0	2	2	0	0	0	0
Conserved oligomeric Golgi complex subunit 8 OS=Saccharomyces cerevisiae (strain ATCC 204508 / S288c) OX=559292 GN=COG8 PE=1 SV=1	Q04632	COG8	70 kDa		unknown	0	194320	198430	0	0	0	-1	-1	0	1	1	0	0	0	0	0	0	2	3	0	0	0	0	0
Nucleoporin NUP116/NSP116 OS=Saccharomyces cerevisiae (strain ATCC 204508 / S288c) OX=559292 GN=NUP116 PE=1 SV=2	Q02630	NUP116	116 kDa		unknown	0	-1	526100	862520	0	0	0	0	0	0	1	1	0	0	0	0	0	0	2	3	0	0	0	0
Mannan polymerase II complex ANP1 subunit OS=Saccharomyces cerevisiae (strain ATCC 204508 / S288c) OX=559292 GN=ANP1 PE=1 SV=3	P32629	ANP1	58 kDa		unknown	0	-1	763910	1913900	-1	-1	0	-1	0	0	1	1	0	0	0	0	0	0	2	3	0	0	0	0
Sideroflexin FSF1 OS=Saccharomyces cerevisiae (strain ATCC 204508 / S288c) OX=559292 GN=FSF1 PE=1 SV=1	Q12029	FSF1	35 kDa		unknown	-1	0	1627600	2501500	-1	-1	0	-1	0	0	1	1	0	0	0	0	0	0	2	3	0	0	0	0
rRNA-processing protein FCF2 OS=Saccharomyces cerevisiae (strain ATCC 204508 / S288c) OX=559292 GN=FCF2 PE=1 SV=1	Q12035	FCF2	26 kDa		unknown	2361700	-1	771100	-1	-1	0	-1	-1	1	0	0.98	0	0	0	0	0	4	0	1	0	0	0	0	0
ATPase GET3 OS=Saccharomyces cerevisiae (strain ATCC 204508 / S288c) OX=559292 GN=GET3 PE=1 SV=1	Q12154	GET3	39 kDa		unknown	0	1696200	-1	541110	0	-1	-1	-1	0	1	0	0.97	0	0	0	0	0	4	0	1	0	0	0	0
Cluster of Vacuolar protein sorting/targeting protein VPS10 OS=Saccharomyces cerevisiae (strain ATCC 204508 / S288c) OX=559292 GN=PEP1 PE=1 SV=1 (P32319)	P32319 [4]	PEP1	178 kDa	TRUE	unknown	0	0	-1	0	0	0	0	0	0.97	0	0	1	0	0.34	0.08	0.67	1	0	0	2	0	0	0	0
Chromatin structure-remodeling complex protein RSC14 OS=Saccharomyces cerevisiae (strain ATCC 204508 / S288c) OX=559292 GN=LDB7 PE=1 SV=2	P38210	LDB7	20 kDa		unknown	1282300	140930	0	1169100	-1	-1	-1	-1	1	0.97	0.09	1	0	0	0	0	2	1	0	1	0	0	0	0
Cluster of Inosine-5'-monophosphate dehydrogenase 3 OS=Saccharomyces cerevisiae (strain ATCC 204508 / S288c) OX=559292 GN=IMD3 PE=1 SV=1 (P50095)	P50095 [2]	IMD3	57 kDa	TRUE	unknown	0	0	-1	0	-1	0	-1	0	1	0	0	0.97	0	1	0	0	2	0	0	1	0	1	0	0
DNA-directed RNA polymerase III subunit RPC9 OS=Saccharomyces cerevisiae (strain ATCC 204508 / S288c) OX=559292 GN=RPC17 PE=1 SV=2	P47076	RPC17	19 kDa		unknown	384720	0	217670	1439500	0	-1	0	0	0.97	0	0.97	1	0	0	0	0	1	0	1	2	0	0	0	0
Pre-mRNA-splicing factor RSE1 OS=Saccharomyces cerevisiae (strain ATCC 204508 / S288c) OX=559292 GN=RSE1 PE=1 SV=1	Q04693	RSE1	154 kDa		unknown	69793	0	77203	147010	0	0	0	0	0.97	0	0.98	1	0	0	0	0	1	0	1	2	0	0	0	0
Vacuolar transporter chaperone 4 OS=Saccharomyces cerevisiae (strain ATCC 204508 / S288c) OX=559292 GN=VTC4 PE=1 SV=2	P47075	VTC4	83 kDa		unknown	364050	0	1111400	441150	0	0	0	0	0.97	0	1	0.97	0	0	0	0	1	0	2	1	0	0	0	0
DNA mismatch repair protein MSH1, mitochondrial OS=Saccharomyces cerevisiae (strain ATCC 204508 / S288c) OX=559292 GN=MSH1 PE=1 SV=2	P25846	MSH1	109 kDa		unknown	74902	109410	0	37026	0	0	0	-1	0.97	1	0	0.97	0	0	0	0	1	2	0	1	0	0	0	0
Cytochrome c oxidase assembly protein COX15 OS=Saccharomyces cerevisiae (strain ATCC 204508 / S288c) OX=559292 GN=COX15 PE=3 SV=1	P40086	COX15	55 kDa		unknown	228140	-1	718540	943650	0	-1	-1	-1	0.97	0	0.98	1	0	0	0	0	1	0	1	2	0	0	0	0
Putative glycosyltransferase HOC1 OS=Saccharomyces cerevisiae (strain ATCC 204508 / S288c) OX=559292 GN=HOC1 PE=1 SV=3	P47124	HOC1	46 kDa		unknown	363550	0	1119300	2862600	-1	-1	-1	-1	0.97	0	0.98	1	0	0	0	0	1	0	1	2	0	0	0	0
Ino eighty subunit 3 OS=Saccharomyces cerevisiae (strain ATCC 204508 / S288c) OX=559292 GN=IES3 PE=1 SV=1	Q12345	IES3	28 kDa		unknown	1000800	-1	858240	1422800	-1	-1	-1	-1	0.97	0	0.98	1	0	0	0	0	1	0	1	2	0	0	0	0
Enoyl-[acyl-carrier-protein] reductase, mitochondrial OS=Saccharomyces cerevisiae (strain ATCC 204508 / S288c) OX=559292 GN=ETR1 PE=1 SV=3	P38071	ETR1	42 kDa		unknown	402500	830580	364100	0	-1	0	-1	0	0.97	1	0.98	0	0	0	0	0	1	2	1	0	0	0	0	0
Putative uridine kinase DAS2 OS=Saccharomyces cerevisiae (strain ATCC 204508 / S288c) OX=559292 GN=DAS2 PE=1 SV=1	Q12084	DAS2	27 kDa		unknown	929320	-1	304640	957180	0	-1	-1	-1	1	0	0.98	0.97	0	0	0	0	2	0	1	1	0	0	0	0
Cytosolic Fe-S cluster assembly factor NBP35 OS=Saccharomyces cerevisiae (strain ATCC 204508 / S288c) OX=559292 GN=NBP35 PE=1 SV=1	P52920	NBP35	35 kDa		unknown	2166900	-1	1785800	1303700	0	-1	-1	-1	1	0	0.98	0.97	0	0	0	0	2	0	1	1	0	0	0	0
Ras-like protein 2 OS=Saccharomyces cerevisiae (strain ATCC 204508 / S288c) OX=559292 GN=RAS2 PE=1 SV=4	P01120	RAS2	35 kDa		unknown	122640	360350	134940	0	-1	-1	-1	-1	0.97	1	0.98	0	0	0	0	0	1	2	1	0	0	0	0	0
Chromatin structure-remodeling complex protein RSC6 OS=Saccharomyces cerevisiae (strain ATCC 204508 / S288c) OX=559292 GN=RSC6 PE=1 SV=1	P25632	RSC6	54 kDa		unknown	0	83492	252280	316720	-1	0	-1	-1	0	0.97	0.98	1	0	0	0	0	0	1	1	2	0	0	0	0
1,3-beta-glucanosyltransferase GAS5 OS=Saccharomyces cerevisiae (strain ATCC 204508 / S288c) OX=559292 GN=GAS5 PE=1 SV=1	Q08193	GAS5	52 kDa		unknown	-1	317010	771810	1974600	-1	0	-1	-1	0	0.97	0.98	1	0	0	0	0	0	1	1	2	0	0	0	0
Guanine nucleotide-binding protein subunit beta OS=Saccharomyces cerevisiae (strain ATCC 204508 / S288c) OX=559292 GN=STE4 PE=1 SV=2	P18851	STE4	47 kDa		unknown	325860	530380	0	481600	0	0	-1	0	0.97	1	0	0.97	0	0	0	0	1	2	0	1	0	0	0	0
Non-histone protein 10 OS=Saccharomyces cerevisiae (strain ATCC 204508 / S288c) OX=559292 GN=NHP10 PE=1 SV=1	Q03435	NHP10	24 kDa		unknown	1946900	605580	-1	1302000	-1	-1	-1	-1	1	0.97	0	0.97	0	0	0	0	2	1	0	1	0	0	0	0
Uncharacterized mitochondrial membrane protein FMP10 OS=Saccharomyces cerevisiae (strain ATCC 204508 / S288c) OX=559292 GN=FMP10 PE=1 SV=1	P40098	FMP10	28 kDa		unknown	-1	687310	1021200	614580	-1	-1	-1	-1	0	0.97	1	0.97	0	0	0	0	0	1	2	1	0	0	0	0
UTP--glucose-1-phosphate uridylyltransferase OS=Saccharomyces cerevisiae (strain ATCC 204508 / S288c) OX=559292 GN=UGP1 PE=1 SV=1	P32861	UGP1	56 kDa		unknown	313000	301200	0	218650	0	0	-1	0	1	0.97	0	0.97	0	0	0	0	2	1	0	1	0	0	0	0
Bifunctional purine biosynthetic protein ADE5,7 OS=Saccharomyces cerevisiae (strain ATCC 204508 / S288c) OX=559292 GN=ADE5,7 PE=1 SV=1	P07244	ADE5	86 kDa		unknown	50367	267800	-1	-1	0	327720	0	0	0.97	1	0	0	0	0.97	0	0	1	2	0	0	0	1	0	0
Mitochondrial group I intron splicing factor CCM1 OS=Saccharomyces cerevisiae (strain ATCC 204508 / S288c) OX=559292 GN=CCM1 PE=1 SV=1	P48237	CCM1	101 kDa		unknown	59912	115830	-1	37839	-1	0	-1	0	0.97	1	0	0.97	0	0	0	0	1	2	0	1	0	0	0	0
C-8 sterol isomerase OS=Saccharomyces cerevisiae (strain ATCC 204508 / S288c) OX=559292 GN=ERG2 PE=1 SV=1	P32352	ERG2	25 kDa		unknown	7342500	-1	-1	1177300	-1	4093400	-1	-1	1	0	0	0.97	0	0.97	0	0	2	0	0	1	0	1	0	0
Casein kinase II subunit alpha OS=Saccharomyces cerevisiae (strain ATCC 204508 / S288c) OX=559292 GN=CKA1 PE=1 SV=1	P15790	CKA1	45 kDa		unknown	393000	1088400	-1	647330	-1	0	0	-1	0.94	1	0	0.97	0	0	0	0	1	2	0	1	0	0	0	0
Ribosomal RNA-processing protein 7 OS=Saccharomyces cerevisiae (strain ATCC 204508 / S288c) OX=559292 GN=RRP7 PE=1 SV=1	P25368	RRP7	34 kDa		unknown	0	532550	2203100	1275800	0	0	0	0	0	0.95	1	0.96	0	0	0	0	0	1	2	1	0	0	0	0
Vacuolar protein sorting-associated protein 35 OS=Saccharomyces cerevisiae (strain ATCC 204508 / S288c) OX=559292 GN=VPS35 PE=1 SV=2	P34110	VPS35	109 kDa		unknown	80515	88515	297140	0	-1	0	0	0	0.97	1	0.92	0	0	0	0	0	1	2	1	0	0	0	0	0
5-oxoprolinase OS=Saccharomyces cerevisiae (strain ATCC 204508 / S288c) OX=559292 GN=OXP1 PE=1 SV=2	P28273	OXP1	140 kDa		unknown	34443	86122	0	428940	0	0	0	0	0.97	1	0	0.91	0	0	0	0	1	2	0	1	0	0	0	0
Ribose-phosphate pyrophosphokinase 5 OS=Saccharomyces cerevisiae (strain ATCC 204508 / S288c) OX=559292 GN=PRS5 PE=1 SV=1	Q12265	PRS5	54 kDa		unknown	0	220100	0	351890	0	936910	0	0	0	1	0	0.97	0	0.88	0	0	0	2	0	1	0	1	0	0
Mitochondrial acidic protein MAM33 OS=Saccharomyces cerevisiae (strain ATCC 204508 / S288c) OX=559292 GN=MAM33 PE=1 SV=1	P40513	MAM33	30 kDa		unknown	3045200	2781000	-1	538660	-1	-1	-1	-1	1	0.88	0	0.97	0	0	0	0	2	1	0	1	0	0	0	0
Protein HLJ1 OS=Saccharomyces cerevisiae (strain ATCC 204508 / S288c) OX=559292 GN=HLJ1 PE=1 SV=1	P48353	HLJ1	25 kDa		unknown	4284400	-1	4193100	3754700	0	-1	-1	-1	1	0	0.92	0.91	0	0	0	0	2	0	1	1	0	0	0	0
20S-pre-rRNA D-site endonuclease NOB1 OS=Saccharomyces cerevisiae (strain ATCC 204508 / S288c) OX=559292 GN=NOB1 PE=1 SV=1	Q08444	NOB1	52 kDa		unknown	150630	163200	321460	-1	0	-1	0	0	0.97	0.83	1	0	0	0	0	0	1	1	2	0	0	0	0	0
Pre-mRNA-splicing factor 6 OS=Saccharomyces cerevisiae (strain ATCC 204508 / S288c) OX=559292 GN=PRP6 PE=1 SV=1	P19735	PRP6	104 kDa		unknown	104510	-1	113460	46926	-1	-1	0	0	0.97	0	1	0.68	0	0	0	0	1	0	2	1	0	0	0	0
Carboxypeptidase S OS=Saccharomyces cerevisiae (strain ATCC 204508 / S288c) OX=559292 GN=CPS1 PE=1 SV=2	P27614	CPS1	65 kDa		unknown	0	143290	416650	628520	0	0	0	0	0	0.55	0.98	1	0	0	0	0	0	1	1	2	0	0	0	0
Altered inheritance of mitochondria protein 24, mitochondrial OS=Saccharomyces cerevisiae (strain ATCC 204508 / S288c) OX=559292 GN=AIM24 PE=1 SV=1	P47127	AIM24	44 kDa		unknown	258670	740460	-1	172770	0	0	0	-1	0.98	1	0	0.48	0	0	0	0	1	2	0	1	0	0	0	0
Cluster of Vacuolar protein sorting-associated protein 21 OS=Saccharomyces cerevisiae (strain ATCC 204508 / S288c) OX=559292 GN=VPS21 PE=1 SV=1 (P36017)	P36017 [2]	VPS21	23 kDa	TRUE	unknown	-1	-1	416780	0	-1	0	0	-1	0	0	0.99	0.97	0	0.47	0	0	0	0	2	1	0	1	0	0
MIOREX complex component 1 OS=Saccharomyces cerevisiae (strain ATCC 204508 / S288c) OX=559292 GN=MRX1 PE=1 SV=1	P40050	MRX1	80 kDa		unknown	306880	118180	0	118260	0	0	-1	0	1	0.47	0	0.91	0	0	0	0	2	1	0	1	0	0	0	0
Helicase SWR1 OS=Saccharomyces cerevisiae (strain ATCC 204508 / S288c) OX=559292 GN=SWR1 PE=1 SV=1	Q05471	SWR1	175 kDa		unknown	61250	0	23103	55030	0	0	0	0	0.97	0	0.32	1	0	0	0	0	1	0	1	2	0	0	0	0
Urea amidolyase OS=Saccharomyces cerevisiae (strain ATCC 204508 / S288c) OX=559292 GN=DUR1,2 PE=1 SV=2	P32528	DUR1	202 kDa		unknown	-1	0	108660	29434	0	0	378200	-1	0	0	1	0.62	0	0	0.58	0	0	0	2	1	0	0	1	0
SWI5-dependent HO expression protein 4 OS=Saccharomyces cerevisiae (strain ATCC 204508 / S288c) OX=559292 GN=SHE4 PE=1 SV=2	P51534	SHE4	90 kDa		unknown	214840	0	118930	0	-1	0	0	0	1	0	1	0	0	0.06	0	0.08	2	0	2	0	0	0	0	0
DNA polymerase epsilon subunit B OS=Saccharomyces cerevisiae (strain ATCC 204508 / S288c) OX=559292 GN=DPB2 PE=1 SV=3	P24482	DPB2	78 kDa		unknown	0	187250	182230	-1	-1	0	0	-1	0	1	1	0	0	0	0	0	0	2	2	0	0	0	0	0
ERAD-associated E3 ubiquitin-protein ligase DOA10 OS=Saccharomyces cerevisiae (strain ATCC 204508 / S288c) OX=559292 GN=SSM4 PE=1 SV=1	P40318	SSM4	151 kDa		unknown	-1	0	342990	331900	-1	0	0	0	0	0	1	1	0	0	0	0	0	0	2	2	0	0	0	0
Uncharacterized protein YNR040W OS=Saccharomyces cerevisiae (strain ATCC 204508 / S288c) OX=559292 GN=YNR040W PE=1 SV=1	P53736	YNR040W	29 kDa		unknown	-1	692350	-1	790520	-1	0	0	-1	0	1	0	1	0	0	0	0	0	2	0	2	0	0	0	0
N-acyl-phosphatidylethanolamine-hydrolyzing phospholipase D, mitochondrial OS=Saccharomyces cerevisiae (strain ATCC 204508 / S288c) OX=559292 GN=FMP30 PE=1 SV=1	Q02883	FMP30	54 kDa		unknown	0	384830	-1	287790	0	-1	-1	-1	0	1	0	1	0	0	0	0	0	2	0	2	0	0	0	0
ATP-dependent RNA helicase DBP6 OS=Saccharomyces cerevisiae (strain ATCC 204508 / S288c) OX=559292 GN=DBP6 PE=1 SV=1	P53734	DBP6	70 kDa		unknown	-1	539820	236820	0	0	0	-1	0	0	1	0.98	0	0	0	0	0	0	3	1	0	0	0	0	0
Putative mitochondrial cysteine synthase OS=Saccharomyces cerevisiae (strain ATCC 204508 / S288c) OX=559292 GN=MCY1 PE=1 SV=1	P53206	MCY1	43 kDa		unknown	-1	-1	156020	648120	0	0	-1	0	0	0	0.98	1	0	0	0	0	0	0	1	3	0	0	0	0
GDP-Man:Man(3)GlcNAc(2)-PP-Dol alpha-1,2-mannosyltransferase OS=Saccharomyces cerevisiae (strain ATCC 204508 / S288c) OX=559292 GN=ALG11 PE=1 SV=1	P53954	ALG11	63 kDa		unknown	60888	89803	105940	0	0	0	0	0	0.48	0.99	0.5	0	0	0	0	0	1	2	1	0	0	0	0	0
Origin recognition complex subunit 3 OS=Saccharomyces cerevisiae (strain ATCC 204508 / S288c) OX=559292 GN=ORC3 PE=1 SV=1	P54790	ORC3	72 kDa		unknown	219410	0	-1	230000	0	0	0	-1	0.91	0	0	1	0	0	0	0	1	0	0	3	0	0	0	0
Shuttling pre-60S factor ECM1 OS=Saccharomyces cerevisiae (strain ATCC 204508 / S288c) OX=559292 GN=ECM1 PE=1 SV=2	P39715	ECM1	24 kDa		unknown	1270000	2197300	393630	0	-1	-1	-1	-1	0.48	1	0.41	0	0	0	0	0	1	2	1	0	0	0	0	0
Branched-chain-amino-acid aminotransferase, cytosolic OS=Saccharomyces cerevisiae (strain ATCC 204508 / S288c) OX=559292 GN=BAT2 PE=1 SV=1	P47176	BAT2	42 kDa	TRUE	unknown	0	410460	0	464210	-1	0	-1	-1	0	0.65	0	0.99	0	0	0	0	0	1	0	2	0	0	0	0
General amino acid permease AGP1 OS=Saccharomyces cerevisiae (strain ATCC 204508 / S288c) OX=559292 GN=AGP1 PE=1 SV=3	P25376	AGP1	70 kDa		unknown	-1	0	-1	391190	0	-1	0	0	0	0	0	1	0	0	0	0.11	0	0	0	2	0	0	0	0
Ubiquinone biosynthesis monooxygenase COQ6, mitochondrial OS=Saccharomyces cerevisiae (strain ATCC 204508 / S288c) OX=559292 GN=COQ6 PE=1 SV=1	P53318	COQ6	54 kDa		unknown	452920	-1	-1	-1	0	0	-1	0	1	0	0	0	0	0.09	0	0	3	0	0	0	0	0	0	0
Guanine nucleotide-binding protein subunit beta 1 OS=Saccharomyces cerevisiae (strain ATCC 204508 / S288c) OX=559292 GN=GPB1 PE=1 SV=1	Q08886	GPB1	101 kDa		unknown	-1	0	434070	0	0	0	186770	-1	0	0.07	1	0	0.14	0	0.86	0	0	0	2	0	0	0	1	0
Calcium channel YVC1 OS=Saccharomyces cerevisiae (strain ATCC 204508 / S288c) OX=559292 GN=YVC1 PE=1 SV=2	Q12324	YVC1	78 kDa		unknown	295160	-1	914590	0	0	-1	0	-1	0.97	0	1	0	0.07	0	0	0	1	0	2	0	0	0	0	0
Putative mitochondrial translation system component PET127 OS=Saccharomyces cerevisiae (strain ATCC 204508 / S288c) OX=559292 GN=PET127 PE=1 SV=2	P32606	PET127	93 kDa		unknown	113440	198160	0	-1	0	0	-1	0	0.97	1	0	0	0.06	0	0	0	1	2	0	0	0	0	0	0
Trafficking protein particle complex II-specific subunit 120 OS=Saccharomyces cerevisiae (strain ATCC 204508 / S288c) OX=559292 GN=TRS120 PE=1 SV=1	Q04183	TRS120	148 kDa		unknown	127090	96034	0	0	0	0	0	0	1	0.97	0	0	0	0.06	0	0	2	1	0	0	0	0	0	0
Glycogen phosphorylase OS=Saccharomyces cerevisiae (strain ATCC 204508 / S288c) OX=559292 GN=GPH1 PE=1 SV=4	P06738	GPH1	103 kDa		unknown	44419	105510	0	0	0	0	0	0	1	0.97	0	0	0	0	0	0	2	1	0	0	0	0	0	0
ER membrane protein complex subunit 2 OS=Saccharomyces cerevisiae (strain ATCC 204508 / S288c) OX=559292 GN=EMC2 PE=1 SV=1	P47133	EMC2	34 kDa		unknown	0	-1	636230	3040800	0	0	0	0	0	0	0.98	1	0	0	0	0	0	0	1	2	0	0	0	0
Mitochondrial carrier protein MTM1 OS=Saccharomyces cerevisiae (strain ATCC 204508 / S288c) OX=559292 GN=MTM1 PE=1 SV=1	P53320	MTM1	41 kDa		unknown	323380	115240	0	0	0	0	-1	0	1	0.97	0	0	0	0	0	0	2	1	0	0	0	0	0	0
Tyrosine--tRNA ligase, cytoplasmic OS=Saccharomyces cerevisiae (strain ATCC 204508 / S288c) OX=559292 GN=TYS1 PE=1 SV=3	P36421	TYS1	44 kDa		unknown	0	531450	-1	327810	0	-1	0	0	0	1	0	0.97	0	0	0	0	0	2	0	1	0	0	0	0
Nucleoporin POM152 OS=Saccharomyces cerevisiae (strain ATCC 204508 / S288c) OX=559292 GN=POM152 PE=1 SV=1	P39685	POM152	152 kDa		unknown	0	0	22843	76535	-1	0	-1	0	0	0	0.98	1	0	0	0	0	0	0	1	2	0	0	0	0
WD repeat-containing protein JIP5 OS=Saccharomyces cerevisiae (strain ATCC 204508 / S288c) OX=559292 GN=JIP5 PE=1 SV=2	Q06214	JIP5	55 kDa		unknown	0	185710	0	354020	-1	0	-1	0	0	1	0	0.97	0	0	0	0	0	2	0	1	0	0	0	0
Protein SST2 OS=Saccharomyces cerevisiae (strain ATCC 204508 / S288c) OX=559292 GN=SST2 PE=1 SV=2	P11972	SST2	80 kDa		unknown	-1	173760	422250	-1	0	0	0	0	0	0.97	1	0	0	0	0	0	0	1	2	0	0	0	0	0
GrpE protein homolog, mitochondrial OS=Saccharomyces cerevisiae (strain ATCC 204508 / S288c) OX=559292 GN=MGE1 PE=1 SV=1	P38523	MGE1	26 kDa		unknown	-1	667750	353380	-1	-1	0	-1	-1	0	0.96	1	0	0	0	0	0	0	1	2	0	0	0	0	0
Fatty aldehyde dehydrogenase HFD1 OS=Saccharomyces cerevisiae (strain ATCC 204508 / S288c) OX=559292 GN=HFD1 PE=1 SV=1	Q04458	HFD1	60 kDa		unknown	0	372680	0	0	0	0	0	0	0	1	0	0.97	0	0	0	0	0	2	0	1	0	0	0	0
Endoplasmic reticulum transmembrane protein 3 OS=Saccharomyces cerevisiae (strain ATCC 204508 / S288c) OX=559292 GN=YET3 PE=1 SV=1	Q07451	YET3	23 kDa		unknown	0	0	282470	1095200	-1	-1	-1	-1	0	0	0.98	1	0	0	0	0	0	0	1	2	0	0	0	0
Protein HMF1 OS=Saccharomyces cerevisiae (strain ATCC 204508 / S288c) OX=559292 GN=HMF1 PE=1 SV=1	P40037	HMF1	14 kDa		unknown	-1	1535800	1070600	0	-1	-1	-1	-1	0	1	0.98	0	0	0	0	0	0	2	1	0	0	0	0	0
DNA-directed RNA polymerase III subunit RPC10 OS=Saccharomyces cerevisiae (strain ATCC 204508 / S288c) OX=559292 GN=RPC11 PE=1 SV=1	Q04307	RPC11	13 kDa		unknown	2506700	-1	-1	3209900	-1	-1	-1	-1	0.97	0	0	1	0	0	0	0	1	0	0	2	0	0	0	0
Putative mitochondrial carrier protein PET8 OS=Saccharomyces cerevisiae (strain ATCC 204508 / S288c) OX=559292 GN=PET8 PE=1 SV=1	P38921	PET8	31 kDa		unknown	0	0	-1	0	0	0	0	-1	0.97	1	0	0	0	0	0	0	1	2	0	0	0	0	0	0
Serine/threonine-protein kinase PSK2 OS=Saccharomyces cerevisiae (strain ATCC 204508 / S288c) OX=559292 GN=PSK2 PE=1 SV=1	Q08217	PSK2	124 kDa		unknown	0	16578	-1	43733	0	-1	-1	0	0	1	0	0.97	0	0	0	0	0	2	0	1	0	0	0	0
Phosphatidylglycerol/phosphatidylinositol transfer protein OS=Saccharomyces cerevisiae (strain ATCC 204508 / S288c) OX=559292 GN=NPC2 PE=1 SV=1	Q12408	NPC2	19 kDa		unknown	3740900	8066700	-1	-1	-1	-1	-1	-1	1	0.97	0	0	0	0	0	0	2	1	0	0	0	0	0	0
Exosome complex component RRP4 OS=Saccharomyces cerevisiae (strain ATCC 204508 / S288c) OX=559292 GN=RRP4 PE=1 SV=1	P38792	RRP4	39 kDa		unknown	0	288820	0	0	0	0	-1	0	0	0.91	0	1	0	0	0	0	0	1	0	2	0	0	0	0
Glutamine--tRNA ligase OS=Saccharomyces cerevisiae (strain ATCC 204508 / S288c) OX=559292 GN=GLN4 PE=1 SV=2	P13188	GLN4	93 kDa		unknown	132480	0	196990	0	0	0	-1	0	0.91	0	1	0	0	0	0	0	1	0	2	0	0	0	0	0
Exocyst complex component SEC8 OS=Saccharomyces cerevisiae (strain ATCC 204508 / S288c) OX=559292 GN=SEC8 PE=1 SV=1	P32855	SEC8	122 kDa		unknown	195500	0	30285	0	0	0	-1	0	1	0	0.86	0	0	0	0	0	2	0	1	0	0	0	0	0
Structural maintenance of chromosomes protein 2 OS=Saccharomyces cerevisiae (strain ATCC 204508 / S288c) OX=559292 GN=SMC2 PE=1 SV=1	P38989	SMC2	134 kDa		unknown	137030	52097	0	0	0	0	0	0	1	0.72	0	0	0	0.1	0	0	2	1	0	0	0	0	0	0
Nucleoporin NDC1 OS=Saccharomyces cerevisiae (strain ATCC 204508 / S288c) OX=559292 GN=NDC1 PE=1 SV=1	P32500	NDC1	74 kDa		unknown	0	-1	373820	51947	0	0	0	0	0.06	0	1	0.77	0	0	0	0	0	0	2	1	0	0	0	0
26S proteasome regulatory subunit RPN10 OS=Saccharomyces cerevisiae (strain ATCC 204508 / S288c) OX=559292 GN=RPN10 PE=1 SV=3	P38886	RPN10	30 kDa		unknown	843270	-1	2062500	-1	-1	-1	-1	-1	0.8	0	1	0	0	0	0	0	1	0	2	0	0	0	0	0
Elongator complex protein 5 OS=Saccharomyces cerevisiae (strain ATCC 204508 / S288c) OX=559292 GN=IKI1 PE=1 SV=1	P38874	IKI1	35 kDa		unknown	280580	788270	-1	-1	-1	-1	-1	-1	0.68	1	0	0	0	0	0	0	1	2	0	0	0	0	0	0
N-(5'-phosphoribosyl)anthranilate isomerase OS=Saccharomyces cerevisiae (strain ATCC 204508 / S288c) OX=559292 GN=TRP1 PE=1 SV=2	P00912	TRP1	24 kDa		unknown	-1	6095300	-1	2813600	-1	0	-1	0	0	1	0	0.48	0	0	0	0	0	2	0	1	0	0	0	0
Actin-related protein 5 OS=Saccharomyces cerevisiae (strain ATCC 204508 / S288c) OX=559292 GN=ARP5 PE=1 SV=1	P53946	ARP5	88 kDa		unknown	0	69010	-1	-1	0	0	0	-1	1	0.31	0	0	0	0	0	0	2	1	0	0	0	0	0	0
Sphingoid long chain base kinase 5 OS=Saccharomyces cerevisiae (strain ATCC 204508 / S288c) OX=559292 GN=LCB5 PE=1 SV=1	Q06147	LCB5	78 kDa		unknown	0	0	120640	-1	0	1441200	0	0	0	0	1	0	0	0.26	0	0	0	0	2	0	0	1	0	0
Membrane-bound O-acyltransferase GUP1 OS=Saccharomyces cerevisiae (strain ATCC 204508 / S288c) OX=559292 GN=GUP1 PE=1 SV=1	P53154	GUP1	65 kDa		unknown	-1	0	-1	944490	0	0	0	0	0	0	0	1	0	0	0	0	0	0	0	3	0	0	0	0
GPI transamidase component GPI16 OS=Saccharomyces cerevisiae (strain ATCC 204508 / S288c) OX=559292 GN=GPI16 PE=1 SV=2	P38875	GPI16	69 kDa		unknown	-1	-1	-1	1723200	0	0	0	0	0	0	0	1	0	0	0	0	0	0	0	3	0	0	0	0
Exosome complex exonuclease RRP6 OS=Saccharomyces cerevisiae (strain ATCC 204508 / S288c) OX=559292 GN=RRP6 PE=1 SV=1	Q12149	RRP6	84 kDa		unknown	109190	0	0	-1	-1	-1	0	0	1	0	0	0	0	0	0	0	2	0	0	0	0	0	0	0
Probable family 17 glucosidase SCW10 OS=Saccharomyces cerevisiae (strain ATCC 204508 / S288c) OX=559292 GN=SCW10 PE=1 SV=1	Q04951	SCW10	40 kDa		unknown	-1	-1	-1	1731900	0	-1	0	-1	0	0	0	1	0.07	0	0	0	0	0	0	2	0	0	0	0
Uncharacterized protein YGR266W OS=Saccharomyces cerevisiae (strain ATCC 204508 / S288c) OX=559292 GN=YGR266W PE=1 SV=1	P53326	YGR266W	81 kDa		unknown	419500	0	0	0	-1	0	-1	0	1	0	0	0	0	0	0	0	2	0	0	0	0	0	0	0
DNA mismatch repair protein HSM3 OS=Saccharomyces cerevisiae (strain ATCC 204508 / S288c) OX=559292 GN=HSM3 PE=1 SV=1	P38348	HSM3	56 kDa		unknown	-1	0	196980	0	-1	-1	-1	-1	0	0	1	0	0	0	0	0	0	0	2	0	0	0	0	0
Glutathione reductase OS=Saccharomyces cerevisiae (strain ATCC 204508 / S288c) OX=559292 GN=GLR1 PE=1 SV=2	P41921	GLR1	53 kDa		unknown	-1	72327	0	0	0	-1	0	-1	0	1	0	0	0	0	0	0	0	2	0	0	0	0	0	0
Probable ATP-dependent RNA helicase DHR1 OS=Saccharomyces cerevisiae (strain ATCC 204508 / S288c) OX=559292 GN=ECM16 PE=1 SV=1	Q04217	ECM16	145 kDa		unknown	98959	0	0	0	0	-1	0	0	1	0	0	0	0	0	0	0	2	0	0	0	0	0	0	0
Syntaxin UFE1 OS=Saccharomyces cerevisiae (strain ATCC 204508 / S288c) OX=559292 GN=UFE1 PE=1 SV=2	P41834	UFE1	41 kDa		unknown	776160	-1	-1	0	0	-1	0	0	1	0	0	0	0	0	0	0	2	0	0	0	0	0	0	0
Bifunctional purine biosynthesis protein ADE16 OS=Saccharomyces cerevisiae (strain ATCC 204508 / S288c) OX=559292 GN=ADE16 PE=1 SV=1	P54113	ADE16	65 kDa		unknown	0	58905	0	0	0	-1	-1	-1	0	1	0	0	0	0	0	0	0	2	0	0	0	0	0	0
Low-affinity phosphate transporter PHO91 OS=Saccharomyces cerevisiae (strain ATCC 204508 / S288c) OX=559292 GN=PHO91 PE=1 SV=2	P27514	PHO91	99 kDa		unknown	-1	0	-1	665850	-1	-1	-1	0	0	0	0	1	0	0	0	0	0	0	0	2	0	0	0	0
Alpha-1,3-mannosyltransferase MNN1 OS=Saccharomyces cerevisiae (strain ATCC 204508 / S288c) OX=559292 GN=MNN1 PE=1 SV=1	P39106	MNN1	89 kDa		unknown	0	0	-1	191620	-1	-1	0	-1	0	0	0	1	0	0	0	0	0	0	0	2	0	0	0	0
Probable ATP-dependent permease OS=Saccharomyces cerevisiae (strain ATCC 204508 / S288c) OX=559292 GN=ADP1 PE=1 SV=2	P25371	ADP1	117 kDa		unknown	0	0	-1	107760	0	0	-1	0	0	0	0	1	0	0	0	0	0	0	0	2	0	0	0	0
DNA damage-inducible protein 1 OS=Saccharomyces cerevisiae (strain ATCC 204508 / S288c) OX=559292 GN=DDI1 PE=1 SV=1	P40087	DDI1	47 kDa		unknown	0	-1	-1	925610	-1	-1	-1	-1	0	0	0	1	0	0	0	0	0	0	0	2	0	0	0	0
Ubiquitin-conjugating enzyme E2 6 OS=Saccharomyces cerevisiae (strain ATCC 204508 / S288c) OX=559292 GN=UBC6 PE=1 SV=1	P33296	UBC6	28 kDa		unknown	-1	0	-1	1041400	-1	-1	-1	-1	0	0	0	1	0	0	0	0	0	0	0	2	0	0	0	0
Serine/threonine-protein kinase Haspin homolog ALK1 OS=Saccharomyces cerevisiae (strain ATCC 204508 / S288c) OX=559292 GN=ALK1 PE=1 SV=2	P43633	ALK1	86 kDa		unknown	0	316890	0	0	0	0	-1	-1	0	1	0	0	0	0	0	0	0	2	0	0	0	0	0	0
Altered inheritance of mitochondria protein 6 OS=Saccharomyces cerevisiae (strain ATCC 204508 / S288c) OX=559292 GN=AIM6 PE=3 SV=2	Q07716	AIM6	44 kDa		unknown	0	-1	0	395330	0	0	-1	-1	0	0	0	1	0	0	0	0	0	0	0	2	0	0	0	0
Glycerol-3-phosphate dehydrogenase [NAD(+)] 2, mitochondrial OS=Saccharomyces cerevisiae (strain ATCC 204508 / S288c) OX=559292 GN=GPD2 PE=1 SV=2	P41911	GPD2	49 kDa		unknown	-1	-1	623010	0	0	0	-1	0	0	0	1	0	0	0	0	0	0	0	2	0	0	0	0	0
Ammonia transport outward protein 3 OS=Saccharomyces cerevisiae (strain ATCC 204508 / S288c) OX=559292 GN=ATO3 PE=1 SV=1	Q12359	ATO3	30 kDa		unknown	-1	-1	3867300	-1	-1	-1	-1	-1	0	0	1	0	0	0	0	0	0	0	2	0	0	0	0	0
Trafficking protein particle complex subunit 33 OS=Saccharomyces cerevisiae (strain ATCC 204508 / S288c) OX=559292 GN=TRS33 PE=1 SV=1	Q99394	TRS33	31 kDa		unknown	1392000	0	0	0	0	-1	0	-1	1	0	0	0	0	0	0	0	2	0	0	0	0	0	0	0
Translocation protein SEC72 OS=Saccharomyces cerevisiae (strain ATCC 204508 / S288c) OX=559292 GN=SEC72 PE=1 SV=3	P39742	SEC72	22 kDa		unknown	-1	-1	-1	3432500	-1	0	-1	-1	0	0	0	1	0	0	0	0	0	0	0	2	0	0	0	0
NAP1-binding protein 2 OS=Saccharomyces cerevisiae (strain ATCC 204508 / S288c) OX=559292 GN=NBP2 PE=1 SV=1	Q12163	NBP2	27 kDa		unknown	0	962310	0	0	0	0	0	0	0	1	0	0	0	0	0	0	0	2	0	0	0	0	0	0
Holocytochrome-c synthase OS=Saccharomyces cerevisiae (strain ATCC 204508 / S288c) OX=559292 GN=CYC3 PE=1 SV=1	P06182	CYC3	30 kDa		unknown	0	1570400	0	0	-1	0	-1	0	0	1	0	0	0	0	0	0	0	2	0	0	0	0	0	0
Mitochondrial nuclease OS=Saccharomyces cerevisiae (strain ATCC 204508 / S288c) OX=559292 GN=NUC1 PE=1 SV=1	P08466	NUC1	37 kDa		unknown	0	-1	94948	-1	-1	0	-1	-1	0	0	1	0	0	0	0	0	0	0	2	0	0	0	0	0
