# Supplementary material
Source: HighWire-hosted journal article supplement (doi:10.1101/rna.079416.122)
Supplement: Supplemental_Table_S9.xlsx [file Supplemental_Table_S9.xlsx]

## Sheet: Sheet1
						Quantitative Value (Normalized iBAQ)	Quantitative Value (Normalized iBAQ)	Quantitative Value (Normalized iBAQ)	Quantitative Value (Normalized iBAQ)	Quantitative Value (Normalized iBAQ)	Quantitative Value (Normalized iBAQ)	Quantitative Value (Normalized iBAQ)	Quantitative Value (Normalized iBAQ)	Quantitative Value (Normalized iBAQ)	Quantitative Value (Normalized iBAQ)	Quantitative Value (Normalized iBAQ)	Quantitative Value (Normalized iBAQ)	Quantitative Value (Normalized iBAQ)	Quantitative Value (Normalized iBAQ)	Quantitative Value (Normalized iBAQ)	Quantitative Value (Normalized iBAQ)	Quantitative Value (Normalized iBAQ)	Quantitative Value (Normalized iBAQ)	Protein Identification Probability	Protein Identification Probability	Protein Identification Probability	Protein Identification Probability	Protein Identification Probability	Protein Identification Probability	Protein Identification Probability	Protein Identification Probability	Protein Identification Probability	Protein Identification Probability	Protein Identification Probability	Protein Identification Probability	Protein Identification Probability	Protein Identification Probability	Protein Identification Probability	Protein Identification Probability	Protein Identification Probability	Protein Identification Probability	Total Spectrum Count	Total Spectrum Count	Total Spectrum Count	Total Spectrum Count	Total Spectrum Count	Total Spectrum Count	Total Spectrum Count	Total Spectrum Count
Identified Proteins (2086)	Accession Number	Alternate ID	Molecular Weight	Protein Grouping Ambiguity	Taxonomy	131I_5019+_Upf1-FLAG	131P_5019+_Upf1-FLAG	132I_5020+_Upf1-FLAG	132P_5020+_Upf1-FLAG	133I_5034+_DE572AA-FLAG	133P_5034+_DE572AA-FLAG	134I_5035+_DE572AA-FLAG	134P_5035+_DE572AA-FLAG	135I_5033+_DE572AA-FLAG	135P_5033+_DE572AA-FLAG	136I_5334+_Upf1-FLAG, upf2Œî	136P_5334+_Upf1-FLAG, upf2Œî	140I_5017+_Upf1-FLAG	140P_5017+_Upf1-FLAG	141I_5337+_Upf1-FLAG, upf2Œî	141P_5337+_Upf1-FLAG, upf2Œî	142I_5338+_Upf1-FLAG, upf2Œî	142P_5338+_Upf1-FLAG, upf2Œî	131I_5019+_Upf1-FLAG	131P_5019+_Upf1-FLAG	132I_5020+_Upf1-FLAG	132P_5020+_Upf1-FLAG	133I_5034+_DE572AA-FLAG	133P_5034+_DE572AA-FLAG	134I_5035+_DE572AA-FLAG	134P_5035+_DE572AA-FLAG	135I_5033+_DE572AA-FLAG	135P_5033+_DE572AA-FLAG	136I_5334+_Upf1-FLAG, upf2Œî	136P_5334+_Upf1-FLAG, upf2Œî	140I_5017+_Upf1-FLAG	140P_5017+_Upf1-FLAG	141I_5337+_Upf1-FLAG, upf2Œî	141P_5337+_Upf1-FLAG, upf2Œî	142I_5338+_Upf1-FLAG, upf2Œî	142P_5338+_Upf1-FLAG, upf2Œî	131I_5019+_Upf1-FLAG	131P_5019+_Upf1-FLAG	132I_5020+_Upf1-FLAG	132P_5020+_Upf1-FLAG	133I_5034+_DE572AA-FLAG	133P_5034+_DE572AA-FLAG	134I_5035+_DE572AA-FLAG	134P_5035+_DE572AA-FLAG
60S ribosomal protein L3 OS=Saccharomyces cerevisiae (strain ATCC 204508 / S288c) OX=559292 GN=RPL3 PE=1 SV=4	P14126	RPL3	44 kDa		unknown	3242800000	4539200000	3224800000	5507800000	2761600000	5764300000	2231100000	4659900000	5366100000	6969400000	4063100000	7220100000	3312400000	7744300000	4572800000	7048600000	3217500000	6213000000	1	1	1	1	1	1	1	1	1	1	1	1	1	1	1	1	1	1	764	25	818	58	1178	59	788	39
Guanine nucleotide-binding protein subunit beta-like protein OS=Saccharomyces cerevisiae (strain ATCC 204508 / S288c) OX=559292 GN=ASC1 PE=1 SV=4	P38011	ASC1	35 kDa		unknown	7481100000	5680700000	6789900000	6800000000	6027600000	5523000000	6004800000	6499700000	8725000000	8805600000	8478500000	13213000000	8041600000	7959400000	7175100000	7012200000	8860000000	6791700000	1	1	1	1	1	1	1	1	1	1	1	1	1	1	1	1	1	1	587	30	584	49	624	41	451	39
Cluster of 40S ribosomal protein S1-B OS=Saccharomyces cerevisiae (strain ATCC 204508 / S288c) OX=559292 GN=RPS1B PE=1 SV=3 (P23248)	P23248 [2]	RPS1B	29 kDa	TRUE	unknown	7954800000	8566700000	7716300000	11324000000	8419000000	17117000000	9136800000	10770000000	9237300000	11037000000	10632000000	11192000000	9095200000	11231000000	9504800000	10686000000	8661900000	9408900000	1	1	1	1	1	1	1	1	1	1	1	1	1	1	1	1	1	1	560	49	566	89	854	84	609	69
Cluster of 60S ribosomal protein L8-B OS=Saccharomyces cerevisiae (strain ATCC 204508 / S288c) OX=559292 GN=RPL8B PE=1 SV=3 (P29453)	P29453 [2]	RPL8B	28 kDa	TRUE	unknown	7885000000	7893900000	7691500000	13377000000	6354000000	6395900000	6504500000	9886400000	8077100000	4683900000	6392900000	5426100000	7089300000	7025400000	6547900000	6271800000	7268200000	7526000000	1	1	1	1	1	1	1	1	1	1	1	1	1	1	1	1	1	1	436	30	533	54	809	40	518	42
Cluster of 60S ribosomal protein L4-A OS=Saccharomyces cerevisiae (strain ATCC 204508 / S288c) OX=559292 GN=RPL4A PE=1 SV=4 (P10664)	P10664 [2]	RPL4A	39 kDa	TRUE	unknown	11997000000	10210000000	10465000000	11798000000	10751000000	13932000000	10803000000	14276000000	11673000000	19162000000	11729000000	18382000000	10026000000	17061000000	5162600000	13569000000	9717400000	18550000000	1	1	1	1	1	1	1	1	1	1	1	1	1	1	1	1	1	1	369	41	465	59	713	71	449	52
60S ribosomal protein L5 OS=Saccharomyces cerevisiae (strain ATCC 204508 / S288c) OX=559292 GN=RPL5 PE=1 SV=4	P26321	RPL5	34 kDa		unknown	6355800000	5544500000	5646600000	5761300000	5483300000	4086100000	4955800000	6615400000	9375800000	9403800000	4607900000	12229000000	5766500000	13740000000	9594200000	10505000000	3805300000	8134300000	1	1	1	1	1	1	1	1	1	1	1	1	1	1	1	1	1	1	439	19	483	29	443	26	333	19
60S acidic ribosomal protein P0 OS=Saccharomyces cerevisiae (strain ATCC 204508 / S288c) OX=559292 GN=RPP0 PE=1 SV=2	P05317	RPP0	34 kDa		unknown	10172000000	10714000000	11015000000	13000000000	11586000000	7536500000	13782000000	13399000000	7504100000	11272000000	10396000000	10650000000	9750400000	11105000000	14379000000	12045000000	11038000000	10748000000	1	1	1	1	1	1	1	1	1	1	1	1	1	1	1	1	1	1	461	26	510	41	615	37	362	35
40S ribosomal protein S4-A OS=Saccharomyces cerevisiae (strain ATCC 204508 / S288c) OX=559292 GN=RPS4A PE=1 SV=1	P0CX35	RPS4A	29 kDa		unknown	5722800000	5916600000	5318600000	6723500000	4349200000	8511000000	3878400000	7648800000	7060600000	8291200000	5311300000	9029900000	5336400000	8313100000	6916800000	8767700000	4137300000	7013600000	1	1	1	1	1	1	1	1	1	1	1	1	1	1	1	1	1	1	409	28	419	60	534	50	364	38
Cluster of Transposon Ty1-LR2 Gag-Pol polyprotein OS=Saccharomyces cerevisiae (strain ATCC 204508 / S288c) OX=559292 GN=TY1B-LR2 PE=3 SV=1 (P0C2I5)	P0C2I5 [14]	TY1B-LR2	199 kDa	TRUE	unknown	300070000	0	313690000	0	281810000	0	453740000	23031000	343770000	0	415970000	98365000	252800000	110800000	335190000	140100000	439050000	0	1	0.98	1	1	1	1	1	1	1	1	1	1	1	1	1	1	1	1	497	2	454	19	373	17	366	18
40S ribosomal protein S3 OS=Saccharomyces cerevisiae (strain ATCC 204508 / S288c) OX=559292 GN=RPS3 PE=1 SV=5	P05750	RPS3	27 kDa		unknown	11549000000	12037000000	10378000000	14219000000	9475900000	17468000000	10044000000	18030000000	11099000000	17360000000	11749000000	22270000000	10023000000	15092000000	12749000000	16509000000	10945000000	17564000000	1	1	1	1	1	1	1	1	1	1	1	1	1	1	1	1	1	1	316	42	397	57	571	62	367	46
60S ribosomal protein L2-B OS=Saccharomyces cerevisiae (strain ATCC 204508 / S288c) OX=559292 GN=RPL2B PE=1 SV=1	P0CX46	RPL2B	27 kDa		unknown	7421000000	7958000000	8129100000	8829700000	7579900000	6298000000	6588600000	11534000000	7961400000	9612200000	7231400000	10091000000	6525300000	11192000000	11080000000	10518000000	7448900000	10745000000	1	1	1	1	1	1	1	1	1	1	1	1	1	1	1	1	1	1	269	21	338	34	495	30	302	32
40S ribosomal protein S8-B OS=Saccharomyces cerevisiae (strain ATCC 204508 / S288c) OX=559292 GN=RPS8B PE=1 SV=1	P0CX40	RPS8B	22 kDa		unknown	10092000000	11375000000	9172700000	12983000000	7960600000	9067700000	7108800000	12613000000	10453000000	12396000000	10371000000	14911000000	7328700000	12885000000	14263000000	11357000000	11589000000	13484000000	1	1	1	1	1	1	1	1	1	1	1	1	1	1	1	1	1	1	182	25	291	27	542	27	315	24
Fatty acid synthase subunit beta OS=Saccharomyces cerevisiae (strain ATCC 204508 / S288c) OX=559292 GN=FAS1 PE=1 SV=2	P07149	FAS1	229 kDa		unknown	207430000	0	228950000	55907000	221100000	104330000	259730000	54297000	416490000	960150000	305580000	294140000	204330000	225340000	272510000	83411000	198890000	102170000	1	0.09	1	1	1	1	1	1	1	1	1	1	1	1	1	1	1	1	376	0	352	28	346	28	304	21
Elongation factor 1-alpha OS=Saccharomyces cerevisiae (strain ATCC 204508 / S288c) OX=559292 GN=TEF1 PE=1 SV=1	P02994	TEF1	50 kDa		unknown	3123400000	7192000000	3750000000	5076300000	3462700000	3724600000	3657700000	3761000000	4388000000	5360400000	3544500000	4269400000	3769900000	3012300000	4530900000	3540000000	3580900000	3132500000	1	1	1	1	1	1	1	1	1	1	1	1	1	1	1	1	1	1	314	31	324	50	417	48	299	34
Fatty acid synthase subunit alpha OS=Saccharomyces cerevisiae (strain ATCC 204508 / S288c) OX=559292 GN=FAS2 PE=1 SV=2	P19097	FAS2	207 kDa		unknown	170980000	0	165880000	29855000	167230000	44477000	187210000	14751000	389870000	653780000	252990000	1439900000	154980000	441290000	166660000	49489000	154820000	26773000	1	0.4	1	1	1	1	1	1	1	1	1	1	1	1	1	1	1	1	353	0	340	14	315	12	276	7
Cluster of Plasma membrane ATPase 1 OS=Saccharomyces cerevisiae (strain ATCC 204508 / S288c) OX=559292 GN=PMA1 PE=1 SV=2 (P05030)	P05030 [2]	PMA1	100 kDa	TRUE	unknown	1540600000	968410000	1443800000	1225800000	1560200000	1402100000	1984000000	961500000	1282800000	2062400000	1705100000	1493800000	1088400000	911260000	1647800000	904650000	1691100000	605930000	1	1	1	1	1	1	1	1	1	1	1	1	1	1	1	1	1	1	426	24	410	34	403	32	324	24
Cluster of 60S ribosomal protein L9-A OS=Saccharomyces cerevisiae (strain ATCC 204508 / S288c) OX=559292 GN=RPL9A PE=1 SV=2 (P05738)	P05738 [2]	RPL9A	22 kDa	TRUE	unknown	6161300000	1329500000	5703300000	10209000000	4025200000	6074200000	4645200000	7980900000	8164300000	11821000000	5351000000	9828000000	6833400000	8705200000	10068000000	8960900000	5739000000	9706500000	1	1	1	1	1	1	1	1	1	1	1	1	1	1	1	1	1	1	238	15	268	30	498	31	306	27
60S ribosomal protein L12-A OS=Saccharomyces cerevisiae (strain ATCC 204508 / S288c) OX=559292 GN=RPL12A PE=1 SV=1	P0CX53	RPL12A	18 kDa		unknown	10397000000	4169800000	9917900000	3789400000	7977400000	5700900000	9724300000	1974600000	4091200000	2417100000	5003400000	1968600000	9287600000	5667700000	7947100000	7421600000	6854400000	6795000000	1	1	1	1	1	1	1	1	1	1	1	1	1	1	1	1	1	1	221	13	337	20	416	15	320	13
40S ribosomal protein S18-A OS=Saccharomyces cerevisiae (strain ATCC 204508 / S288c) OX=559292 GN=RPS18A PE=1 SV=1	P0CX55	RPS18A	17 kDa		unknown	10168000000	11593000000	11276000000	11917000000	12687000000	9947800000	12996000000	8784000000	6478800000	3410900000	9803100000	5045900000	10514000000	8410700000	10252000000	9068400000	13533000000	9250700000	1	1	1	1	1	1	1	1	1	1	1	1	1	1	1	1	1	1	287	28	322	40	428	36	250	35
40S ribosomal protein S5 OS=Saccharomyces cerevisiae (strain ATCC 204508 / S288c) OX=559292 GN=RPS5 PE=1 SV=3	P26783	RPS5	25 kDa		unknown	7739500000	10206000000	9674600000	12607000000	11694000000	17922000000	6814600000	11972000000	10138000000	10871000000	11460000000	14527000000	8804300000	14345000000	12724000000	15842000000	7234700000	18252000000	1	1	1	1	1	1	1	1	1	1	1	1	1	1	1	1	1	1	281	25	301	41	439	40	289	33
60S ribosomal protein L1-A OS=Saccharomyces cerevisiae (strain ATCC 204508 / S288c) OX=559292 GN=RPL1A PE=1 SV=1	P0CX43	RPL1A	24 kDa		unknown	5252500000	3438700000	4680300000	4423600000	5163000000	4030800000	4202800000	3828100000	4916100000	3039400000	5975100000	4951100000	4651300000	4487800000	7181800000	5081000000	4403200000	4447300000	1	1	1	1	1	1	1	1	1	1	1	1	1	1	1	1	1	1	249	19	314	30	246	28	176	25
Cluster of 60S ribosomal protein L7-A OS=Saccharomyces cerevisiae (strain ATCC 204508 / S288c) OX=559292 GN=RPL7A PE=1 SV=3 (P05737)	P05737 [2]	RPL7A	28 kDa	TRUE	unknown	8543000000	9719600000	9157100000	11658000000	9613500000	10198000000	8904800000	15040000000	9456700000	12865000000	9447000000	11511000000	8599400000	12400000000	9063900000	12134000000	7611700000	13448000000	1	1	1	1	1	1	1	1	1	1	1	1	1	1	1	1	1	1	234	44	277	56	481	57	331	48
Cluster of Heat shock protein SSA2 OS=Saccharomyces cerevisiae (strain ATCC 204508 / S288c) OX=559292 GN=SSA2 PE=1 SV=3 (P10592)	P10592 [4]	SSA2	69 kDa	TRUE	unknown	677720000	0	654920000	94592000	1017100000	0	1139400000	0	1244900000	274340000	1105700000	351290000	946140000	327550000	624740000	168300000	1171700000	147940000	1	1	1	1	1	1	1	1	1	1	1	1	1	1	1	1	1	1	323	8	315	14	378	13	269	9
60S ribosomal protein L23-A OS=Saccharomyces cerevisiae (strain ATCC 204508 / S288c) OX=559292 GN=RPL23A PE=1 SV=1	P0CX41	RPL23A	14 kDa		unknown	6005200000	2691000000	6031400000	4950100000	5865000000	2117000000	5459000000	2613200000	3992000000	2193600000	5172300000	2111100000	6599700000	2668100000	2651900000	2283200000	5452800000	2151800000	1	1	1	1	1	1	1	1	1	1	1	1	1	1	1	1	1	1	397	7	357	23	465	20	354	15
Pyruvate kinase 1 OS=Saccharomyces cerevisiae (strain ATCC 204508 / S288c) OX=559292 GN=CDC19 PE=1 SV=2	P00549	CDC19	55 kDa	TRUE	unknown	1285600000	1468500000	1597100000	2366400000	1185400000	2361300000	1262400000	1219500000	2162200000	4401200000	1576100000	2447500000	1321400000	1634400000	1753300000	1496000000	1407400000	1137200000	1	1	1	1	1	1	1	1	1	1	1	1	1	1	1	1	1	1	296	35	306	60	329	52	213	41
Cluster of 40S ribosomal protein S14-B OS=Saccharomyces cerevisiae (strain ATCC 204508 / S288c) OX=559292 GN=RPS14B PE=1 SV=2 (P39516)	P39516 [2]	RPS14B	15 kDa	TRUE	unknown	8051100000	1623800000	7965400000	5028200000	7390300000	14961000000	6890100000	7176800000	6883300000	10241000000	7393800000	9731700000	5690600000	7041300000	4379200000	8700300000	7992800000	11504000000	1	1	1	1	1	1	1	1	1	1	1	1	1	1	1	1	1	1	390	9	402	23	314	30	244	26
40S ribosomal protein S22-A OS=Saccharomyces cerevisiae (strain ATCC 204508 / S288c) OX=559292 GN=RPS22A PE=1 SV=2	P0C0W1 (+1)	RPS22A	15 kDa		unknown	6291200000	4301100000	5577900000	3896500000	4010900000	3708800000	4214000000	2451300000	7498600000	1941700000	4533500000	3723300000	5441400000	4995100000	4070700000	4015000000	5107500000	3610000000	1	1	1	1	1	1	1	1	1	1	1	1	1	1	1	1	1	1	307	13	302	15	207	16	177	10
Cluster of Glyceraldehyde-3-phosphate dehydrogenase 3 OS=Saccharomyces cerevisiae (strain ATCC 204508 / S288c) OX=559292 GN=TDH3 PE=1 SV=3 (P00359)	P00359 [3]	TDH3	36 kDa	TRUE	unknown	1231200000	1014700000	1260700000	1200100000	1186700000	1340100000	1055900000	677740000	1274100000	469800000	1398700000	2035400000	901210000	651290000	1621700000	1253900000	1442200000	930430000	1	1	1	1	1	1	1	1	1	1	1	1	1	1	1	1	1	1	248	17	296	26	306	23	209	14
60S ribosomal protein L10 OS=Saccharomyces cerevisiae (strain ATCC 204508 / S288c) OX=559292 GN=RPL10 PE=1 SV=1	P41805	RPL10	25 kDa		unknown	2517200000	4047800000	2983800000	4997600000	3616700000	5149200000	2466800000	6901800000	4811800000	3793100000	3998600000	4657200000	3300200000	6472500000	3498700000	5621400000	2531800000	5818300000	1	1	1	1	1	1	1	1	1	1	1	1	1	1	1	1	1	1	250	24	259	33	358	34	228	28
Protein URA2 OS=Saccharomyces cerevisiae (strain ATCC 204508 / S288c) OX=559292 GN=URA2 PE=1 SV=5	P07259	URA2	245 kDa	TRUE	unknown	71025000	0	83378000	20383000	95480000	30082000	108450000	2392500	174230000	360450000	160030000	188630000	82463000	127150000	104200000	60153000	102780000	25002000	1	0	1	1	1	1	1	1	1	1	1	1	1	1	1	1	1	1	268	0	266	11	267	10	225	2
Cluster of Pyruvate decarboxylase isozyme 1 OS=Saccharomyces cerevisiae (strain ATCC 204508 / S288c) OX=559292 GN=PDC1 PE=1 SV=7 (P06169)	P06169 [4]	PDC1	61 kDa	TRUE	unknown	855520000	900570000	939440000	917560000	1024200000	1511200000	1018300000	659990000	915940000	891250000	638930000	595210000	907870000	612980000	719480000	411180000	713430000	288170000	1	1	1	1	1	1	1	1	1	1	1	1	1	1	1	1	1	1	344	13	332	24	342	22	244	18
Elongation factor 2 OS=Saccharomyces cerevisiae (strain ATCC 204508 / S288c) OX=559292 GN=EFT1 PE=1 SV=1	P32324	EFT1	93 kDa		unknown	308030000	38623000	302870000	57711000	287570000	72765000	306730000	26318000	414660000	165990000	344760000	148210000	349630000	178530000	460250000	73419000	366800000	65582000	1	0.99	1	1	1	1	1	1	1	1	1	1	1	1	1	1	1	1	285	1	277	12	246	7	209	3
60S ribosomal protein L43-B OS=Saccharomyces cerevisiae (strain ATCC 204508 / S288c) OX=559292 GN=RPL43B PE=1 SV=1	P0CX26	RPL43B	10 kDa		unknown	2395900000	0	1554800000	397080000	1330300000	89072000	869210000	357460000	860200000	298340000	1326800000	349790000	1204100000	827110000	566070000	880450000	1307200000	866950000	1	0	1	0.97	1	0.97	1	0.99	1	0.74	1	1	1	1	1	1	1	1	174	0	235	3	283	3	205	4
ATP-dependent helicase NAM7 OS=Saccharomyces cerevisiae (strain ATCC 204508 / S288c) OX=559292 GN=NAM7 PE=1 SV=1	P30771	NAM7	109 kDa		unknown	264090000	5721500000	295400000	8663200000	92084000	3691900000	88071000	3452400000	97840000	4377700000	241130000	7420000000	317890000	8735200000	292900000	6230000000	246380000	7258700000	1	1	1	1	1	1	1	1	1	1	1	1	1	1	1	1	1	1	186	94	169	156	99	102	82	87
Cluster of Ribosome-associated molecular chaperone SSB1 OS=Saccharomyces cerevisiae (strain ATCC 204508 / S288c) OX=559292 GN=SSB1 PE=1 SV=3 (P11484)	P11484 [2]	SSB1	67 kDa	TRUE	unknown	1091700000	0	1167500000	446630000	998650000	678150000	1410100000	285670000	1372400000	771160000	1338300000	702070000	1032700000	466620000	1230000000	715540000	1269000000	411770000	1	1	1	1	1	1	1	1	1	1	1	1	1	1	1	1	1	1	287	4	290	27	300	19	212	17
Cluster of 60S ribosomal protein L17-A OS=Saccharomyces cerevisiae (strain ATCC 204508 / S288c) OX=559292 GN=RPL17A PE=1 SV=4 (P05740)	P05740 [2]	RPL17A	21 kDa	TRUE	unknown	9541500000	10645000000	8807500000	13213000000	8960100000	15554000000	9556700000	13153000000	11247000000	7223900000	8737600000	9986800000	9377900000	11677000000	8510900000	12213000000	9051900000	10451000000	1	1	1	1	1	1	1	1	1	1	1	1	1	1	1	1	1	1	179	22	124	36	92	35	62	30
Cluster of ATP-dependent RNA helicase DED1 OS=Saccharomyces cerevisiae (strain ATCC 204508 / S288c) OX=559292 GN=DED1 PE=1 SV=2 (P06634)	P06634 [2]	DED1	66 kDa	TRUE	unknown	541450000	133630000	477900000	265660000	541410000	307540000	647430000	230060000	506300000	241920000	658450000	488690000	614260000	483940000	653910000	235700000	655760000	134700000	1	1	1	1	1	1	1	1	1	1	1	1	1	1	1	1	1	1	279	10	280	18	303	15	241	11
40S ribosomal protein S2 OS=Saccharomyces cerevisiae (strain ATCC 204508 / S288c) OX=559292 GN=RPS2 PE=1 SV=3	P25443	RPS2	27 kDa		unknown	4435100000	3376600000	4505900000	6481800000	3832200000	5810200000	3573400000	5305700000	4527800000	1753400000	4334100000	3715300000	5056800000	5229300000	5676700000	4139500000	5218300000	4263100000	1	1	1	1	1	1	1	1	1	1	1	1	1	1	1	1	1	1	214	15	265	39	222	33	171	28
Putative proline--tRNA ligase YHR020W OS=Saccharomyces cerevisiae (strain ATCC 204508 / S288c) OX=559292 GN=YHR020W PE=1 SV=1	P38708	YHR020W	77 kDa		unknown	697170000	286770000	645670000	486150000	754130000	756470000	684750000	338760000	543830000	833430000	672050000	653650000	603850000	581620000	592430000	606180000	674000000	246930000	1	1	1	1	1	1	1	1	1	1	1	1	1	1	1	1	1	1	285	9	255	31	274	33	216	19
Cluster of 40S ribosomal protein S7-A OS=Saccharomyces cerevisiae (strain ATCC 204508 / S288c) OX=559292 GN=RPS7A PE=1 SV=4 (P26786)	P26786 [2]	RPS7A	22 kDa	TRUE	unknown	5043700000	3053900000	4504400000	5310300000	4371400000	4240300000	4747500000	4542700000	5355000000	3068300000	5335700000	3784600000	5829800000	5610100000	5917100000	4133100000	5157400000	4265000000	1	1	1	1	1	1	1	1	1	1	1	1	1	1	1	1	1	1	291	18	289	38	342	34	176	28
eIF-2-alpha kinase activator GCN1 OS=Saccharomyces cerevisiae (strain ATCC 204508 / S288c) OX=559292 GN=GCN1 PE=1 SV=1	P33892	GCN1	297 kDa		unknown	39211000	0	41374000	0	55307000	0	60428000	0	54934000	8906200	55790000	8593400	40122000	16546000	67664000	3387000	49977000	0	1	0	1	0	1	1	1	0	1	1	1	1	1	1	1	1	1	0.36	271	0	252	0	243	1	228	0
Cluster of 40S ribosomal protein S21-B OS=Saccharomyces cerevisiae (strain ATCC 204508 / S288c) OX=559292 GN=RPS21B PE=1 SV=1 (Q3E754)	Q3E754 [2]	RPS21B	10 kDa	TRUE	unknown	4063700000	0	3955500000	835110000	3550900000	480620000	3377100000	0	2201600000	0	2101000000	0	3169000000	1220800000	3377200000	1525300000	2085300000	996010000	1	1	1	1	1	1	1	1	1	1	1	1	1	1	1	1	1	1	179	2	216	13	446	8	312	4
40S ribosomal protein S24-A OS=Saccharomyces cerevisiae (strain ATCC 204508 / S288c) OX=559292 GN=RPS24A PE=1 SV=1	P0CX31	RPS24A	15 kDa		unknown	7189700000	6239200000	6550400000	5583600000	5701000000	6810500000	5753200000	8985900000	6648600000	4995000000	6550800000	6968000000	6698400000	7167900000	6375700000	8018400000	7026900000	6483800000	1	1	1	1	1	1	1	1	1	1	1	1	1	1	1	1	1	1	213	21	228	28	304	29	201	28
Cluster of Elongation factor 3A OS=Saccharomyces cerevisiae (strain ATCC 204508 / S288c) OX=559292 GN=YEF3 PE=1 SV=4 (P16521)	P16521 [2]	YEF3	116 kDa	TRUE	unknown	227600000	0	266300000	224830000	218560000	131110000	250790000	40928000	480820000	1058700000	390410000	361830000	229230000	187160000	248620000	120120000	242740000	64425000	1	0.99	1	1	1	1	1	1	1	1	1	1	1	1	1	1	1	1	237	3	242	19	197	9	128	6
60S ribosomal protein L18-A OS=Saccharomyces cerevisiae (strain ATCC 204508 / S288c) OX=559292 GN=RPL18A PE=1 SV=1	P0CX49	RPL18A	21 kDa		unknown	3827700000	8484200000	3899800000	7006200000	4696300000	2679900000	3004200000	11807000000	4812600000	8511100000	4205200000	8336500000	3497000000	5091700000	4840500000	6964300000	3787800000	6199400000	1	1	1	1	1	1	1	1	1	1	1	1	1	1	1	1	1	1	117	16	177	21	312	23	168	23
Cluster of 40S ribosomal protein S0-A OS=Saccharomyces cerevisiae (strain ATCC 204508 / S288c) OX=559292 GN=RPS0A PE=1 SV=3 (P32905)	P32905 [2]	RPS0A	28 kDa	TRUE	unknown	10343000000	0	10369000000	4435900000	11054000000	0	11872000000	0	7619000000	7310000000	9264200000	11532000000	10401000000	11583000000	9864400000	7896000000	9704400000	12648000000	1	1	1	1	1	1	1	1	1	1	1	1	1	1	1	1	1	1	193	22	201	28	336	19	208	22
40S ribosomal protein S12 OS=Saccharomyces cerevisiae (strain ATCC 204508 / S288c) OX=559292 GN=RPS12 PE=1 SV=1	P48589	RPS12	15 kDa		unknown	7387800000	7400000000	8026700000	6229000000	8663600000	3706400000	6717400000	4067500000	5870500000	102530000	7185800000	1631900000	7723700000	2048500000	11177000000	1282900000	9518100000	1856100000	1	1	1	1	1	1	1	1	1	1	1	1	1	1	1	1	1	1	217	12	173	22	278	17	164	16
60S ribosomal protein L20-B OS=Saccharomyces cerevisiae (strain ATCC 204508 / S288c) OX=559292 GN=RPL20B PE=1 SV=1	P0CX24	RPL20B	20 kDa	TRUE	unknown	10729000000	12420000000	10220000000	14823000000	9435000000	20082000000	9190100000	13642000000	11924000000	14891000000	11322000000	12852000000	10287000000	11246000000	14508000000	10017000000	12351000000	11172000000	1	1	1	1	1	1	1	1	1	1	1	1	1	1	1	1	1	1	186	27	174	46	243	42	178	38
Cluster of 60S ribosomal protein L14-B OS=Saccharomyces cerevisiae (strain ATCC 204508 / S288c) OX=559292 GN=RPL14B PE=1 SV=1 (P38754)	P38754 [2]	RPL14B	15 kDa	TRUE	unknown	4625200000	3795700000	4273900000	5176700000	3820400000	3728900000	3887400000	4765800000	4865200000	4267600000	5440100000	4664000000	5325700000	4247300000	5164100000	4248900000	4439500000	4744300000	1	1	1	1	1	1	1	1	1	1	1	1	1	1	1	1	1	1	152	17	216	20	339	23	242	22
Acetyl-CoA carboxylase OS=Saccharomyces cerevisiae (strain ATCC 204508 / S288c) OX=559292 GN=ACC1 PE=1 SV=2	Q00955	ACC1	250 kDa	TRUE	unknown	30443000	0	36161000	0	35630000	0	36944000	0	87446000	23430000	54636000	7643900	36657000	17121000	48324000	2521600	49144000	9834800	1	0.33	1	0	1	0	1	0	1	1	1	1	1	1	1	1	1	0.68	200	0	186	0	154	0	165	0
Cluster of 60S ribosomal protein L24-A OS=Saccharomyces cerevisiae (strain ATCC 204508 / S288c) OX=559292 GN=RPL24A PE=1 SV=1 (P04449)	P04449 [2]	RPL24A	18 kDa	TRUE	unknown	4786600000	772640000	4502600000	4452900000	4164200000	2279200000	3835000000	3035300000	6257800000	8241700000	5271800000	6560300000	4919000000	7900300000	1017500000	6620300000	4187900000	7757200000	1	1	1	1	1	1	1	1	1	1	1	1	1	1	1	1	1	1	193	9	183	21	304	16	157	14
Cluster of 60S ribosomal protein L11-A OS=Saccharomyces cerevisiae (strain ATCC 204508 / S288c) OX=559292 GN=RPL11A PE=1 SV=2 (P0C0W9)	P0C0W9 [2]	RPL11A	20 kDa	TRUE	unknown	7030900000	10297000000	8082600000	14914000000	9006100000	8517000000	7548800000	9936200000	7643600000	13437000000	6042500000	12622000000	5046600000	11693000000	5519700000	12649000000	5173700000	12629000000	1	1	1	1	1	1	1	1	1	1	1	1	1	1	1	1	1	1	112	18	161	23	226	29	146	24
Cluster of S-adenosylmethionine synthase 1 OS=Saccharomyces cerevisiae (strain ATCC 204508 / S288c) OX=559292 GN=SAM1 PE=1 SV=2 (P10659)	P10659 [2]	SAM1	42 kDa	TRUE	unknown	421670000	763010000	467970000	1120600000	534060000	1360900000	523070000	857830000	591710000	1777200000	646890000	1110700000	395340000	838840000	639030000	957980000	574530000	758050000	1	1	1	1	1	1	1	1	1	1	1	1	1	1	1	1	1	1	219	12	193	22	156	18	146	14
60S ribosomal protein L16-B OS=Saccharomyces cerevisiae (strain ATCC 204508 / S288c) OX=559292 GN=RPL16B PE=1 SV=3	P26785	RPL16B	22 kDa	TRUE	unknown	4515100000	4434200000	4292900000	6074300000	4428800000	4457500000	4027900000	7748000000	4374300000	4343900000	3881200000	5891300000	4129500000	4919400000	3078900000	5390200000	4119200000	6677400000	1	1	1	1	1	1	1	1	1	1	1	1	1	1	1	1	1	1	228	16	216	33	282	37	210	32
40S ribosomal protein S19-A OS=Saccharomyces cerevisiae (strain ATCC 204508 / S288c) OX=559292 GN=RPS19A PE=1 SV=2	P07280	RPS19A	16 kDa		unknown	4760500000	1605800000	4642400000	4881600000	5469300000	5639700000	5391200000	2175600000	993550000	1447200000	2008100000	1517500000	4288400000	2931900000	4004500000	2919000000	3750700000	3873900000	1	1	1	1	1	1	1	1	1	1	1	1	1	1	1	1	1	1	230	9	245	17	289	12	215	11
Pentafunctional AROM polypeptide OS=Saccharomyces cerevisiae (strain ATCC 204508 / S288c) OX=559292 GN=ARO1 PE=1 SV=1	P08566	ARO1	175 kDa		unknown	58994000	0	77709000	31424000	85389000	2349100	132850000	3680700	165020000	242090000	142170000	124210000	140390000	86158000	84329000	39465000	97328000	8445200	1	0.09	1	1	1	1	1	1	1	1	1	1	1	1	1	1	1	1	175	0	198	7	180	4	178	3
40S ribosomal protein S23-B OS=Saccharomyces cerevisiae (strain ATCC 204508 / S288c) OX=559292 GN=RPS23B PE=1 SV=1	P0CX30	RPS23B	16 kDa		unknown	2914000000	1157200000	2414700000	1175200000	2177400000	525310000	2084400000	1876400000	3160100000	1976600000	2981200000	1957500000	3271100000	2872400000	3374400000	3023500000	2955200000	2439600000	1	1	1	1	1	1	1	1	1	1	1	1	1	1	1	1	1	1	188	5	186	5	173	5	132	5
Cluster of 40S ribosomal protein S9-B OS=Saccharomyces cerevisiae (strain ATCC 204508 / S288c) OX=559292 GN=RPS9B PE=1 SV=4 (P05755)	P05755 [2]	RPS9B	22 kDa	TRUE	unknown	5101200000	6666100000	5108400000	5606800000	5036600000	4279300000	5332500000	7331100000	6147500000	5684600000	5846400000	5332200000	4438200000	5549300000	5990800000	5198400000	6550600000	5665200000	1	1	1	1	1	1	1	1	1	1	1	1	1	1	1	1	1	1	206	19	206	32	290	28	174	25
60S ribosomal protein L6-A OS=Saccharomyces cerevisiae (strain ATCC 204508 / S288c) OX=559292 GN=RPL6A PE=1 SV=2	Q02326	RPL6A	20 kDa	TRUE	unknown	7055700000	8907700000	7288700000	9028500000	7293500000	11306000000	7621300000	12545000000	11155000000	12577000000	9301800000	11750000000	8827900000	9552900000	7584400000	9878600000	8169400000	10652000000	1	1	1	1	1	1	1	1	1	1	1	1	1	1	1	1	1	1	178	21	192	34	291	34	179	33
60S ribosomal protein L6-B OS=Saccharomyces cerevisiae (strain ATCC 204508 / S288c) OX=559292 GN=RPL6B PE=1 SV=4	P05739	RPL6B	20 kDa	TRUE	unknown	6612200000	6400500000	6690500000	7559600000	6790700000	9206100000	6939200000	11787000000	10167000000	12542000000	8901400000	11397000000	8647100000	9495400000	7611400000	8931500000	7652800000	9755200000	1	1	1	1	1	1	1	1	1	1	1	1	1	1	1	1	1	1	181	19	202	38	288	36	171	34
Midasin OS=Saccharomyces cerevisiae (strain ATCC 204508 / S288c) OX=559292 GN=MDN1 PE=1 SV=1	Q12019	MDN1	559 kDa		unknown	5965000	0	7699500	0	7939600	0	10056000	0	14142000	0	12100000	0	8282900	390530	12647000	0	9493100	0	1	0.14	1	0.13	1	0	1	0.19	1	0.3	1	0.06	1	1	1	0.52	1	0.61	184	0	179	0	177	0	171	0
60S ribosomal protein L25 OS=Saccharomyces cerevisiae (strain ATCC 204508 / S288c) OX=559292 GN=RPL25 PE=1 SV=4	P04456	RPL25	16 kDa		unknown	9216800000	8790200000	8440900000	10524000000	9078900000	7888300000	8732400000	11707000000	8537000000	13131000000	9737400000	11258000000	10246000000	11131000000	11820000000	10899000000	10094000000	10277000000	1	1	1	1	1	1	1	1	1	1	1	1	1	1	1	1	1	1	183	15	157	22	186	25	114	23
rRNA 2'-O-methyltransferase fibrillarin OS=Saccharomyces cerevisiae (strain ATCC 204508 / S288c) OX=559292 GN=NOP1 PE=1 SV=1	P15646	NOP1	34 kDa		unknown	502490000	0	464970000	183850000	408460000	235090000	440640000	154800000	533340000	144070000	603690000	300020000	484310000	300940000	662900000	202590000	475340000	105550000	1	0.93	1	1	1	1	1	1	1	1	1	1	1	1	1	1	1	1	225	1	204	10	215	9	131	4
V-type proton ATPase subunit B OS=Saccharomyces cerevisiae (strain ATCC 204508 / S288c) OX=559292 GN=VMA2 PE=1 SV=2	P16140	VMA2	58 kDa		unknown	323820000	57163000	360530000	251440000	365980000	343190000	409060000	173250000	454890000	776970000	420030000	600500000	388790000	422650000	428840000	317870000	345570000	103440000	1	1	1	1	1	1	1	1	1	1	1	1	1	1	1	1	1	1	179	3	173	19	177	17	145	11
Cluster of 60S ribosomal protein L22-A OS=Saccharomyces cerevisiae (strain ATCC 204508 / S288c) OX=559292 GN=RPL22A PE=1 SV=3 (P05749)	P05749 [2]	RPL22A	14 kDa	TRUE	unknown	3935000000	0	3316100000	1166600000	3124600000	933580000	3870900000	0	2845100000	0	2577900000	1239200000	4044100000	987970000	5208500000	574990000	3852400000	0	1	0.99	1	1	1	1	1	1	1	1	1	1	1	1	1	1	1	0.71	178	1	202	6	206	7	165	2
Importin subunit beta-4 OS=Saccharomyces cerevisiae (strain ATCC 204508 / S288c) OX=559292 GN=KAP123 PE=1 SV=1	P40069	KAP123	123 kDa		unknown	219660000	87073000	230450000	335140000	219850000	151800000	262670000	158650000	209720000	455620000	287840000	340320000	200640000	278940000	270820000	241160000	254410000	112130000	1	1	1	1	1	1	1	1	1	1	1	1	1	1	1	1	1	1	178	6	185	35	187	19	136	19
Cluster of Ubiquitin-40S ribosomal protein S31 OS=Saccharomyces cerevisiae (strain ATCC 204508 / S288c) OX=559292 GN=RPS31 PE=1 SV=3 (P05759)	P05759 [3]	RPS31	17 kDa	TRUE	unknown	2080300000	4456300000	2703300000	2687800000	1694900000	1405000000	1940600000	2341100000	3081200000	3649000000	2474800000	2389500000	2381900000	1980300000	889600000	1461500000	2381400000	1993500000	1	1	1	1	1	1	1	1	1	1	1	1	1	1	1	1	1	1	163	11	191	21	278	11	156	15
40S ribosomal protein S6-B OS=Saccharomyces cerevisiae (strain ATCC 204508 / S288c) OX=559292 GN=RPS6B PE=1 SV=1	P0CX38	RPS6B	27 kDa		unknown	9583400000	14291000000	9504600000	16519000000	10769000000	17654000000	9236800000	13649000000	7973800000	12822000000	7468300000	15611000000	7265000000	15302000000	7072800000	16247000000	9557500000	16662000000	1	1	1	1	1	1	1	1	1	1	1	1	1	1	1	1	1	1	185	38	180	55	194	55	125	48
40S ribosomal protein S16-B OS=Saccharomyces cerevisiae (strain ATCC 204508 / S288c) OX=559292 GN=RPS16B PE=1 SV=1	P0CX52	RPS16B	16 kDa		unknown	6196800000	4187500000	7115400000	6519500000	6871600000	6456600000	6864800000	5222700000	6243500000	5058100000	6155400000	4302400000	5694400000	5399000000	4651100000	5160500000	6214300000	4768300000	1	1	1	1	1	1	1	1	1	1	1	1	1	1	1	1	1	1	164	15	152	22	241	16	128	14
Cluster of 60S ribosomal protein L15-A OS=Saccharomyces cerevisiae (strain ATCC 204508 / S288c) OX=559292 GN=RPL15A PE=1 SV=3 (P05748)	P05748 [2]	RPL15A	24 kDa	TRUE	unknown	8304100000	33820000000	9137900000	7731700000	7794500000	9243500000	6487700000	12572000000	7687800000	12153000000	7196900000	11907000000	7219800000	9141200000	10377000000	9915300000	6429300000	13610000000	1	1	1	1	1	1	1	1	1	1	1	1	1	1	1	1	1	1	118	26	153	29	250	28	180	25
Cluster of 60S ribosomal protein L13-B OS=Saccharomyces cerevisiae (strain ATCC 204508 / S288c) OX=559292 GN=RPL13B PE=1 SV=1 (P40212)	P40212 [2]	RPL13B	23 kDa	TRUE	unknown	5988800000	4457800000	5179800000	7309600000	6395000000	5064700000	5529100000	8777400000	6356600000	6872100000	7157600000	7728200000	6661000000	9180900000	8597100000	8338900000	5751600000	9986800000	1	1	1	1	1	1	1	1	1	1	1	1	1	1	1	1	1	1	152	17	168	23	276	22	213	21
40S ribosomal protein S15 OS=Saccharomyces cerevisiae (strain ATCC 204508 / S288c) OX=559292 GN=RPS15 PE=1 SV=1	Q01855	RPS15	16 kDa		unknown	2294700000	693840000	2497400000	2869000000	3051200000	5574900000	2602100000	2783200000	1883500000	1112900000	1877100000	1118500000	3333100000	1690100000	4283800000	1816500000	2837200000	1775700000	1	0.99	1	1	1	1	1	1	1	1	1	1	1	1	1	1	1	0.98	247	3	241	7	239	6	139	6
Cluster of 40S ribosomal protein S10-A OS=Saccharomyces cerevisiae (strain ATCC 204508 / S288c) OX=559292 GN=RPS10A PE=1 SV=1 (Q08745)	Q08745 [2]	RPS10A	13 kDa	TRUE	unknown	4454400000	0	3371400000	0	0	0	0	0	1164200000	0	952170000	0	2376300000	0	3680300000	0	3382600000	0	1	1	1	1	1	1	1	1	1	1	1	1	1	1	1	1	1	1	91	6	166	8	184	8	175	5
60S ribosomal protein L16-A OS=Saccharomyces cerevisiae (strain ATCC 204508 / S288c) OX=559292 GN=RPL16A PE=1 SV=3	P26784	RPL16A	22 kDa	TRUE	unknown	3069800000	3424100000	3142800000	4959000000	3261600000	3228000000	3094700000	5634000000	3629800000	2879100000	3071700000	4656400000	3379100000	3607500000	2075300000	3939100000	2982400000	5017400000	1	1	1	1	1	1	1	1	1	1	1	1	1	1	1	1	1	1	163	11	160	25	189	25	147	22
Cluster of 1,3-beta-glucan synthase component FKS1 OS=Saccharomyces cerevisiae (strain ATCC 204508 / S288c) OX=559292 GN=FKS1 PE=1 SV=2 (P38631)	P38631 [2]	FKS1	215 kDa	TRUE	unknown	67922000	0	78286000	0	86737000	0	147390000	0	80605000	0	110560000	0	71326000	2217100	133170000	0	95038000	0	1	0.52	1	0	1	0.11	1	0	1	0.43	1	0.96	1	1	1	0.82	1	0.31	175	0	152	0	159	0	171	0
40S ribosomal protein S20 OS=Saccharomyces cerevisiae (strain ATCC 204508 / S288c) OX=559292 GN=RPS20 PE=1 SV=3	P38701	RPS20	14 kDa		unknown	8121500000	8148600000	9524400000	13191000000	9767300000	8028300000	7429900000	8855000000	5974200000	7372900000	6659300000	8196100000	6477100000	8679200000	7112100000	7300400000	7587700000	7840200000	1	1	1	1	1	1	1	1	1	1	1	1	1	1	1	1	1	1	205	20	183	29	181	24	81	20
3-isopropylmalate dehydrogenase OS=Saccharomyces cerevisiae (strain ATCC 204508 / S288c) OX=559292 GN=LEU2 PE=1 SV=4	P04173	LEU2	39 kDa		unknown	1396400000	1317100000	1272500000	1471300000	287830000	896130000	184560000	82099000	543290000	583410000	864320000	1115700000	1263400000	1460800000	1323100000	1020200000	861300000	470490000	1	1	1	1	1	1	1	1	1	1	1	1	1	1	1	1	1	1	194	18	207	26	63	12	48	4
60S ribosomal protein L28 OS=Saccharomyces cerevisiae (strain ATCC 204508 / S288c) OX=559292 GN=RPL28 PE=1 SV=3	P02406	RPL28	17 kDa		unknown	9152000000	2163400000	9485300000	6931000000	12093000000	10162000000	12858000000	6026300000	7228200000	3208500000	10259000000	3607900000	8830200000	5814500000	9589600000	2672700000	10343000000	4034000000	1	1	1	1	1	1	1	1	1	1	1	1	1	1	1	1	1	1	146	9	140	27	261	19	230	17
Cluster of 60S ribosomal protein L27-A OS=Saccharomyces cerevisiae (strain ATCC 204508 / S288c) OX=559292 GN=RPL27A PE=1 SV=1 (P0C2H6)	P0C2H6 [2]	RPL27A	16 kDa	TRUE	unknown	10524000000	10020000000	10325000000	7498100000	9512600000	9049200000	12247000000	13239000000	13900000000	9613200000	12074000000	10843000000	10483000000	13892000000	13726000000	12590000000	10964000000	9458900000	1	1	1	1	1	1	1	1	1	1	1	1	1	1	1	1	1	1	102	15	116	22	319	22	171	23
Cluster of 60S ribosomal protein L21-A OS=Saccharomyces cerevisiae (strain ATCC 204508 / S288c) OX=559292 GN=RPL21A PE=1 SV=1 (Q02753)	Q02753 [2]	RPL21A	18 kDa	TRUE	unknown	5280500000	4450500000	6062800000	9743700000	6976300000	3776800000	5531300000	6592800000	6609900000	1872800000	5594100000	2927100000	5428600000	6864400000	5637200000	5014600000	5000300000	2897700000	1	1	1	1	1	1	1	1	1	1	1	1	1	1	1	1	1	1	158	14	172	17	214	19	124	17
ATP-dependent 6-phosphofructokinase subunit alpha OS=Saccharomyces cerevisiae (strain ATCC 204508 / S288c) OX=559292 GN=PFK1 PE=1 SV=1	P16861	PFK1	108 kDa	TRUE	unknown	89113000	0	105260000	0	67846000	0	80472000	0	193280000	96542000	158590000	77198000	115760000	69017000	134950000	4620800	101450000	0	1	0	1	0	1	0	1	0	1	1	1	1	1	1	1	1	1	0.1	172	0	149	0	110	0	106	0
60S ribosomal protein L30 OS=Saccharomyces cerevisiae (strain ATCC 204508 / S288c) OX=559292 GN=RPL30 PE=1 SV=3	P14120	RPL30	11 kDa		unknown	4279900000	1347900000	3762200000	3463500000	3496200000	3394900000	3893200000	2423500000	4717600000	3051100000	4985500000	2519100000	5375500000	3383200000	4528300000	3648700000	5332300000	3998900000	1	0.99	1	1	1	1	1	1	1	1	1	1	1	1	1	1	1	1	113	4	124	13	203	14	128	11
Cluster of 60S ribosomal protein L26-B OS=Saccharomyces cerevisiae (strain ATCC 204508 / S288c) OX=559292 GN=RPL26B PE=1 SV=2 (P53221)	P53221 [2]	RPL26B	14 kDa	TRUE	unknown	6006700000	4148000000	6189600000	5321700000	7840400000	6346200000	5027600000	9006700000	6201300000	6577500000	6290700000	7231100000	5201400000	6841400000	3443200000	7967500000	5985600000	5815800000	1	1	1	1	1	1	1	1	1	1	1	1	1	1	1	1	1	1	156	12	158	31	230	38	108	28
Cluster of Enolase 2 OS=Saccharomyces cerevisiae (strain ATCC 204508 / S288c) OX=559292 GN=ENO2 PE=1 SV=2 (P00925)	P00925 [2]	ENO2	47 kDa	TRUE	unknown	446610000	0	374320000	76650000	297660000	150770000	330850000	40457000	370310000	77626000	340310000	210660000	441560000	203410000	624790000	96799000	365450000	0	1	1	1	1	1	1	1	1	1	1	1	1	1	1	1	1	1	1	146	2	119	9	115	12	102	7
40S ribosomal protein S17-A OS=Saccharomyces cerevisiae (strain ATCC 204508 / S288c) OX=559292 GN=RPS17A PE=1 SV=1	P02407 (+1)	RPS17A	16 kDa		unknown	11771000000	8462700000	12484000000	16082000000	14710000000	13414000000	16400000000	12433000000	14889000000	7145800000	16685000000	7524500000	16529000000	10012000000	9354400000	10057000000	18316000000	10289000000	1	1	1	1	1	1	1	1	1	1	1	1	1	1	1	1	1	1	152	24	152	35	194	31	129	30
Glutamine--fructose-6-phosphate aminotransferase [isomerizing] OS=Saccharomyces cerevisiae (strain ATCC 204508 / S288c) OX=559292 GN=GFA1 PE=1 SV=4	P14742	GFA1	80 kDa		unknown	126760000	0	127170000	30243000	112900000	59975000	117560000	14794000	204670000	153190000	137550000	154800000	121810000	121550000	198340000	61737000	155770000	10856000	1	0	1	1	1	1	1	1	1	1	1	1	1	1	1	1	1	1	137	0	130	8	117	9	89	3
Eukaryotic translation initiation factor 3 subunit A OS=Saccharomyces cerevisiae (strain ATCC 204508 / S288c) OX=559292 GN=RPG1 PE=1 SV=1	P38249	RPG1	110 kDa		unknown	48269000	0	62529000	0	55465000	0	60426000	0	130040000	81467000	125080000	48780000	63450000	27292000	56572000	1425200	75019000	0	1	0.06	1	0	1	0	1	0	1	1	1	1	1	1	1	1	1	0	142	0	150	0	117	0	118	0
60S ribosomal protein L19-B OS=Saccharomyces cerevisiae (strain ATCC 204508 / S288c) OX=559292 GN=RPL19B PE=1 SV=1	P0CX83	RPL19B	22 kDa		unknown	7576600000	11714000000	9592500000	9872300000	9728500000	14373000000	9605300000	14293000000	11238000000	12355000000	9724900000	10744000000	10012000000	14282000000	10200000000	11992000000	9697400000	13618000000	1	1	1	1	1	1	1	1	1	1	1	1	1	1	1	1	1	1	121	24	130	32	168	30	125	30
Cluster of 60S ribosomal protein L36-B OS=Saccharomyces cerevisiae (strain ATCC 204508 / S288c) OX=559292 GN=RPL36B PE=1 SV=3 (O14455)	O14455 [2]	RPL36B	11 kDa	TRUE	unknown	5503600000	0	5374600000	0	6420800000	5510100000	6030800000	3250200000	2467800000	818300000	3601700000	2779200000	5551600000	4819800000	5579600000	6018500000	4957900000	5088200000	1	1	1	1	1	1	1	1	1	1	1	1	1	1	1	1	1	1	185	11	191	13	211	12	95	11
40S ribosomal protein S25-B OS=Saccharomyces cerevisiae (strain ATCC 204508 / S288c) OX=559292 GN=RPS25B PE=1 SV=1	P0C0T4 (+1)	RPS25B	12 kDa		unknown	4587000000	1008100000	4097900000	1131600000	3000100000	6024900000	1634600000	2051800000	1064300000	579690000	735090000	434020000	1126600000	630010000	406950000	650800000	3707200000	908110000	1	1	1	1	1	1	1	1	1	0.98	1	1	1	1	1	1	1	0.98	81	6	118	8	211	11	139	7
Methionine--tRNA ligase, cytoplasmic OS=Saccharomyces cerevisiae (strain ATCC 204508 / S288c) OX=559292 GN=MES1 PE=1 SV=4	P00958	MES1	86 kDa		unknown	88727000	0	110210000	47497000	110600000	25751000	154530000	4574300	159700000	100320000	131270000	84451000	141170000	113850000	205100000	48657000	138190000	7343800	1	0	1	1	1	1	1	0.98	1	1	1	1	1	1	1	1	1	1	125	0	118	7	120	7	94	2
40S ribosomal protein S11-B OS=Saccharomyces cerevisiae (strain ATCC 204508 / S288c) OX=559292 GN=RPS11B PE=1 SV=1	P0CX48	RPS11B	18 kDa		unknown	8276900000	15251000000	8795200000	13136000000	9082200000	11434000000	7400800000	13111000000	9630600000	10245000000	9240400000	12958000000	7326700000	10481000000	3498100000	9908000000	8985000000	8324000000	1	1	1	1	1	1	1	1	1	1	1	1	1	1	1	1	1	1	106	25	121	32	177	30	116	27
Glutamate--tRNA ligase, cytoplasmic OS=Saccharomyces cerevisiae (strain ATCC 204508 / S288c) OX=559292 GN=GUS1 PE=1 SV=3	P46655	GUS1	81 kDa		unknown	135250000	7771200	177840000	69709000	172390000	64220000	153110000	4375700	143560000	123360000	133810000	65961000	69948000	43798000	146830000	29233000	134480000	4199700	1	1	1	1	1	1	1	0.97	1	1	1	1	1	1	1	1	1	0.96	137	3	132	17	116	12	89	1
40S ribosomal protein S13 OS=Saccharomyces cerevisiae (strain ATCC 204508 / S288c) OX=559292 GN=RPS13 PE=1 SV=3	P05756	RPS13	17 kDa		unknown	10016000000	14424000000	10321000000	11036000000	9661100000	10518000000	11727000000	15754000000	9998400000	4353900000	10405000000	6390400000	10514000000	8278400000	11456000000	8040900000	9206500000	9055200000	1	1	1	1	1	1	1	1	1	1	1	1	1	1	1	1	1	1	107	22	123	33	174	33	108	29
V-type proton ATPase catalytic subunit A OS=Saccharomyces cerevisiae (strain ATCC 204508 / S288c) OX=559292 GN=VMA1 PE=1 SV=3	P17255	VMA1	119 kDa		unknown	85773000	0	77803000	22650000	83661000	6374200	99485000	2763600	108580000	86333000	124970000	111240000	80615000	69007000	106070000	35131000	87669000	3197600	1	0	1	1	1	1	1	0.99	1	1	1	1	1	1	1	1	1	1	133	0	127	6	105	5	89	1
3-isopropylmalate dehydratase OS=Saccharomyces cerevisiae (strain ATCC 204508 / S288c) OX=559292 GN=LEU1 PE=1 SV=3	P07264	LEU1	86 kDa		unknown	43148000	112350000	45947000	113180000	115820000	597780000	91342000	316190000	182850000	1417000000	72480000	284800000	24117000	94368000	91049000	199780000	85944000	128240000	1	0.89	1	1	1	1	1	1	1	1	1	1	1	1	1	1	1	1	94	2	87	10	120	45	87	19
Cluster of 60S ribosomal protein L31-A OS=Saccharomyces cerevisiae (strain ATCC 204508 / S288c) OX=559292 GN=RPL31A PE=1 SV=1 (P0C2H8)	P0C2H8 [2]	RPL31A	13 kDa	TRUE	unknown	6676100000	0	7391500000	0	8431900000	0	9405200000	0	8824600000	0	9557900000	0	10240000000	0	3964100000	0	8243700000	0	1	1	1	1	1	1	1	1	1	1	1	1	1	1	1	1	1	1	126	12	142	18	194	13	93	14
U3 small nucleolar RNA-associated protein 20 OS=Saccharomyces cerevisiae (strain ATCC 204508 / S288c) OX=559292 GN=UTP20 PE=1 SV=3	P35194	UTP20	288 kDa	TRUE	unknown	8092400	0	7512400	0	9686700	0	12224000	0	11518000	0	12572000	0	11688000	0	13867000	0	12482000	0	1	0	1	0	1	0	1	0	1	0	1	0	1	0	1	0	1	0	121	0	99	0	86	0	112	0
Acetolactate synthase catalytic subunit, mitochondrial OS=Saccharomyces cerevisiae (strain ATCC 204508 / S288c) OX=559292 GN=ILV2 PE=1 SV=1	P07342	ILV2	75 kDa		unknown	134960000	5617700	135170000	65182000	242780000	405790000	252060000	120680000	337720000	614520000	237420000	283530000	101570000	127890000	180730000	131660000	192110000	55478000	1	0.97	1	1	1	1	1	1	1	1	1	1	1	1	1	1	1	1	95	1	83	6	157	19	101	12
ATP-dependent RNA helicase DBP2 OS=Saccharomyces cerevisiae (strain ATCC 204508 / S288c) OX=559292 GN=DBP2 PE=1 SV=1	P24783	DBP2	61 kDa	TRUE	unknown	184580000	0	184860000	0	154440000	0	152910000	0	238950000	6813500	222560000	3411300	238080000	14791000	271340000	0	180160000	-1	1	0.11	1	0	1	0	1	0	1	0.94	1	0.06	1	1	1	0	1	0	144	0	144	0	108	0	98	0
Flavohemoprotein OS=Saccharomyces cerevisiae (strain ATCC 204508 / S288c) OX=559292 GN=YHB1 PE=1 SV=2	P39676	YHB1	45 kDa		unknown	338580000	0	343810000	39204000	327400000	244780000	431870000	56771000	642020000	444250000	538070000	441850000	347000000	126770000	417870000	154960000	458170000	0	1	0	1	1	1	1	1	1	1	1	1	1	1	1	1	1	1	1	103	0	104	2	126	6	111	4
Cluster of ATP-dependent molecular chaperone HSC82 OS=Saccharomyces cerevisiae (strain ATCC 204508 / S288c) OX=559292 GN=HSC82 PE=1 SV=4 (P15108)	P15108 [2]	HSC82	81 kDa	TRUE	unknown	122060000	0	140440000	0	129040000	32669000	163500000	0	377260000	665070000	307700000	349790000	129460000	95921000	216010000	30756000	178330000	0	1	0.99	1	1	1	1	1	1	1	1	1	1	1	1	1	1	1	1	107	2	112	6	112	8	94	2
60S ribosomal protein L32 OS=Saccharomyces cerevisiae (strain ATCC 204508 / S288c) OX=559292 GN=RPL32 PE=1 SV=1	P38061	RPL32	15 kDa		unknown	4199100000	2183700000	3924300000	1613800000	3835400000	952450000	3407000000	1000400000	4796100000	983900000	4501400000	938030000	5096000000	1821200000	6423700000	1806000000	3929200000	1798500000	1	1	1	1	1	1	1	1	1	1	1	1	1	1	1	1	1	1	176	8	145	10	148	9	67	8
Pyruvate dehydrogenase E1 component subunit alpha, mitochondrial OS=Saccharomyces cerevisiae (strain ATCC 204508 / S288c) OX=559292 GN=PDA1 PE=1 SV=2	P16387	PDA1	46 kDa		unknown	147460000	0	184480000	0	191660000	6603100	229440000	0	224840000	5251300	238340000	17659000	267160000	32985000	166120000	0	179990000	0	1	0.16	1	0	1	0.98	1	0	1	0.98	1	1	1	1	1	0	1	0	115	0	121	0	148	1	92	0
Mitochondrial protein import protein MAS5 OS=Saccharomyces cerevisiae (strain ATCC 204508 / S288c) OX=559292 GN=YDJ1 PE=1 SV=1	P25491	YDJ1	45 kDa		unknown	448570000	0	396860000	-1	335810000	0	374640000	-1	382260000	0	445390000	0	340500000	0	708810000	0	480690000	0	1	0	1	0	1	0	1	0	1	0	1	0	1	0	1	0	1	0	134	0	109	0	110	0	75	0
U3 small nucleolar RNA-associated protein 10 OS=Saccharomyces cerevisiae (strain ATCC 204508 / S288c) OX=559292 GN=UTP10 PE=1 SV=1	P42945	UTP10	200 kDa		unknown	18778000	0	19562000	0	22978000	0	30204000	0	30089000	0	33887000	0	29409000	849530	36489000	0	28587000	0	1	0	1	0	1	0.09	1	0.05	1	0.06	1	0	1	0.99	1	0.1	1	0.18	112	0	107	0	99	0	107	0
Protein APA1 OS=Saccharomyces cerevisiae (strain ATCC 204508 / S288c) OX=559292 GN=APA1 PE=1 SV=4	P16550	APA1	36 kDa		unknown	574300000	6889000	585270000	133720000	633850000	356050000	860530000	278740000	685190000	0	724180000	160000000	743740000	107660000	1134500000	95041000	755730000	0	1	0.95	1	1	1	1	1	1	1	0	1	1	1	1	1	1	1	0	121	1	109	4	120	11	100	3
Nucleolar protein 56 OS=Saccharomyces cerevisiae (strain ATCC 204508 / S288c) OX=559292 GN=NOP56 PE=1 SV=1	Q12460	NOP56	57 kDa	TRUE	unknown	296990000	13977000	335820000	149190000	259230000	76416000	284630000	18253000	219920000	53939000	379350000	91698000	290520000	89451000	282370000	18819000	287000000	3385400	1	0.99	1	1	1	1	1	1	1	1	1	1	1	1	1	1	1	0.98	123	1	128	12	97	6	76	3
Nucleolar GTP-binding protein 1 OS=Saccharomyces cerevisiae (strain ATCC 204508 / S288c) OX=559292 GN=NOG1 PE=1 SV=1	Q02892	NOG1	74 kDa		unknown	122180000	0	139150000	16811000	128110000	56494000	137650000	0	169770000	105410000	186010000	126490000	155620000	55663000	238490000	26121000	148920000	6109100	1	0	1	1	1	1	1	0.99	1	1	1	1	1	1	1	1	1	0.75	112	0	103	4	82	6	66	2
NAD-dependent malic enzyme, mitochondrial OS=Saccharomyces cerevisiae (strain ATCC 204508 / S288c) OX=559292 GN=MAE1 PE=1 SV=1	P36013	MAE1	74 kDa		unknown	86975000	15581000000	89195000	24608000	119890000	23515000	118220000	15195000	140730000	539680000	135540000	38749000	91878000	38976000	144350000	36312000	134460000	0	1	0.98	1	1	1	1	1	1	1	1	1	1	1	1	1	1	1	1	101	3	85	3	99	3	91	3
Obg-like ATPase 1 OS=Saccharomyces cerevisiae (strain ATCC 204508 / S288c) OX=559292 GN=OLA1 PE=1 SV=1	P38219	OLA1	44 kDa		unknown	349880000	0	325150000	218970000	293080000	136450000	308180000	21595000	313860000	35143000	320870000	249660000	297830000	212460000	372550000	168280000	325660000	25075000	1	0.9	1	1	1	1	1	0.99	1	1	1	1	1	1	1	1	1	1	122	0	113	12	94	6	84	2
Cluster of Transposon Ty2-C Gag-Pol polyprotein OS=Saccharomyces cerevisiae (strain ATCC 204508 / S288c) OX=559292 GN=TY2B-C PE=3 SV=2 (P25384)	P25384 [8]	TY2B-C	202 kDa	TRUE	unknown	68268000	0	32067000	0	11797000	0	56656000	0	37953000	0	53946000	0	36678000	0	67220000	0	60114000	0	1	0.05	1	0.58	1	0.56	1	0.45	1	0.7	1	0.81	1	0.91	1	0.87	1	0.21	90	0	82	4	65	7	90	6
Glutamate synthase [NADH] OS=Saccharomyces cerevisiae (strain ATCC 204508 / S288c) OX=559292 GN=GLT1 PE=1 SV=2	Q12680	GLT1	238 kDa		unknown	12158000	0	13621000	0	11612000	0	12710000	0	16198000	0	21803000	1315200	16774000	7262300	29386000	1729700	17655000	0	1	0.28	1	0	1	0.06	1	0.29	1	0.31	1	1	1	1	1	0.97	1	0	97	0	94	0	71	0	72	0
Clustered mitochondria protein 1 OS=Saccharomyces cerevisiae (strain ATCC 204508 / S288c) OX=559292 GN=CLU1 PE=1 SV=1	Q03690	CLU1	145 kDa		unknown	16961000	0	24447000	0	19531000	0	21647000	0	54001000	8209700	35324000	9095200	21550000	4944600	17561000	0	26240000	0	1	0.58	1	0	1	0.83	1	0.16	1	1	1	1	1	1	1	0.35	1	0.24	95	0	100	0	86	0	88	0
Ribosomal RNA-processing protein 12 OS=Saccharomyces cerevisiae (strain ATCC 204508 / S288c) OX=559292 GN=RRP12 PE=1 SV=1	Q12754	RRP12	138 kDa		unknown	55502000	0	56454000	0	36738000	0	46205000	0	41611000	0	52150000	0	41394000	9759300	63468000	1623200	54019000	0	1	0	1	0.2	1	0.13	1	0	1	0	1	0.17	1	1	1	0.63	1	0	133	0	111	0	74	0	76	0
General negative regulator of transcription subunit 1 OS=Saccharomyces cerevisiae (strain ATCC 204508 / S288c) OX=559292 GN=CDC39 PE=1 SV=3	P25655	CDC39	240 kDa		unknown	7322800	0	8987000	0	11089000	0	14249000	0	11777000	0	14851000	0	11533000	2909300	13942000	0	14388000	0	1	0	1	0.27	1	0.13	1	0.18	1	0.12	1	0	1	1	1	0.22	1	0	79	0	81	0	97	0	96	0
Cluster of Pleiotropic ABC efflux transporter of multiple drugs OS=Saccharomyces cerevisiae (strain ATCC 204508 / S288c) OX=559292 GN=PDR5 PE=1 SV=1 (P33302)	P33302 [2]	PDR5	170 kDa	TRUE	unknown	3420000	0	6959000	0	33942000	0	50572000	0	31822000	0	54488000	8715500	49078000	35401000	73295000	0	51600000	0	1	0.09	1	0.36	1	0.98	1	0	1	1	1	1	1	1	1	1	1	0.38	22	0	35	0	84	1	81	0
Heat shock protein 60, mitochondrial OS=Saccharomyces cerevisiae (strain ATCC 204508 / S288c) OX=559292 GN=HSP60 PE=1 SV=1	P19882	HSP60	61 kDa		unknown	131620000	0	162390000	0	175000000	0	222680000	0	247600000	12756000	192380000	17549000	133440000	12553000	161680000	0	138810000	0	1	0	1	0.27	1	0	1	0.07	1	1	1	1	1	1	1	0	1	0.09	110	0	114	0	96	0	90	0
ATP synthase subunit beta, mitochondrial OS=Saccharomyces cerevisiae (strain ATCC 204508 / S288c) OX=559292 GN=ATP2 PE=1 SV=2	P00830	ATP2	55 kDa		unknown	210620000	181230000	229200000	152860000	286500000	307130000	322820000	228200000	454760000	612370000	355020000	228490000	240680000	125800000	227930000	32599000	241990000	68963000	1	0.99	1	1	1	1	1	1	1	1	1	1	1	1	1	1	1	1	93	3	86	11	83	13	70	9
Nuclear GTP-binding protein NUG1 OS=Saccharomyces cerevisiae (strain ATCC 204508 / S288c) OX=559292 GN=NUG1 PE=1 SV=1	P40010	NUG1	58 kDa		unknown	186330000	0	179410000	0	163310000	0	213020000	0	173670000	0	217580000	9137600	201060000	25229000	171770000	2358500	179510000	0	1	0.06	1	0	1	0	1	0	1	0.81	1	1	1	1	1	0.7	1	0	121	0	113	0	83	0	80	0
Suppressor protein STM1 OS=Saccharomyces cerevisiae (strain ATCC 204508 / S288c) OX=559292 GN=STM1 PE=1 SV=3	P39015	STM1	30 kDa		unknown	901440000	0	710580000	0	686300000	0	984480000	0	296880000	36269000	528450000	45241000	345620000	14256000	280190000	0	586360000	0	1	0	1	0	1	0	1	0	1	0.64	1	0.97	1	0.95	1	0	1	0	141	0	117	0	112	0	71	0
Cell division control protein 48 OS=Saccharomyces cerevisiae (strain ATCC 204508 / S288c) OX=559292 GN=CDC48 PE=1 SV=3	P25694	CDC48	92 kDa		unknown	44435000	0	56028000	0	64080000	0	58777000	-1	108710000	42618000	67958000	7179700	47678000	8227500	69524000	5563700	63521000	0	1	0	1	0.11	1	0	1	0	1	1	1	1	1	1	1	0.97	1	0	104	0	90	0	101	0	67	0
Mitochondrial phosphate carrier protein OS=Saccharomyces cerevisiae (strain ATCC 204508 / S288c) OX=559292 GN=MIR1 PE=1 SV=1	P23641	MIR1	33 kDa		unknown	505250000	0	438330000	542730000	680030000	1241900000	797530000	450920000	668270000	138130000	572120000	234060000	672850000	422990000	523640000	288340000	745600000	201220000	1	0.85	1	1	1	1	1	1	1	1	1	1	1	1	1	1	1	1	73	0	71	14	97	17	85	10
60S ribosomal protein L35-B OS=Saccharomyces cerevisiae (strain ATCC 204508 / S288c) OX=559292 GN=RPL35B PE=1 SV=1	P0CX85	RPL35B	14 kDa		unknown	10334000000	4148500000	10278000000	7343400000	8891800000	9705500000	9134200000	4636800000	3548700000	3254800000	5492700000	2511000000	6903200000	5340100000	2040900000	4377400000	6220800000	4247100000	1	1	1	1	1	1	1	1	1	1	1	1	1	1	1	1	1	1	100	8	82	28	118	21	76	15
Ribosome biogenesis protein ERB1 OS=Saccharomyces cerevisiae (strain ATCC 204508 / S288c) OX=559292 GN=ERB1 PE=1 SV=1	Q04660	ERB1	92 kDa		unknown	105000000	0	99607000	0	109550000	0	109300000	0	148900000	4626900	124560000	9214300	120030000	65300000	130840000	8539900	107250000	0	1	0	1	0	1	0.98	1	0	1	0.98	1	1	1	1	1	1	1	0	101	0	92	0	83	1	76	0
Protein transport protein SEC7 OS=Saccharomyces cerevisiae (strain ATCC 204508 / S288c) OX=559292 GN=SEC7 PE=1 SV=2	P11075	SEC7	227 kDa		unknown	6502500	0	7372500	0	10102000	0	12370000	0	13404000	0	13940000	0	11824000	0	20691000	0	15031000	0	1	0.29	1	0	1	0	1	0	1	0	1	0	1	0.26	1	0	1	0	62	0	60	0	70	0	77	0
ATP synthase subunit alpha, mitochondrial OS=Saccharomyces cerevisiae (strain ATCC 204508 / S288c) OX=559292 GN=ATP1 PE=1 SV=5	P07251	ATP1	59 kDa		unknown	242220000	226990000	269730000	127210000	312190000	200010000	290910000	176540000	305030000	470260000	238270000	231390000	187070000	132380000	161850000	20187000	191670000	79024000	1	1	1	1	1	1	1	1	1	1	1	1	1	1	1	1	1	1	75	4	73	12	83	10	82	7
60S ribosomal protein L38 OS=Saccharomyces cerevisiae (strain ATCC 204508 / S288c) OX=559292 GN=RPL38 PE=1 SV=1	P49167	RPL38	9 kDa		unknown	5182000000	310170000	4225300000	324490000	4459300000	541530000	4050600000	368150000	3213300000	1868500000	3533600000	1436300000	5836000000	2921700000	3852400000	2585300000	5360800000	3315300000	1	0.74	1	0.46	1	0.46	1	0.65	1	1	1	1	1	1	1	1	1	1	122	2	103	3	93	3	85	3
Pescadillo homolog OS=Saccharomyces cerevisiae (strain ATCC 204508 / S288c) OX=559292 GN=NOP7 PE=1 SV=1	P53261	NOP7	70 kDa		unknown	110610000	0	144200000	0	144560000	0	117950000	0	173640000	23409000	165140000	26863000	166590000	50819000	178020000	12848000	134120000	0	1	0	1	0	1	0	1	0	1	0.64	1	1	1	1	1	1	1	0	91	0	98	0	91	0	71	0
Cluster of 40S ribosomal protein S28-A OS=Saccharomyces cerevisiae (strain ATCC 204508 / S288c) OX=559292 GN=RPS28A PE=1 SV=1 (Q3E7X9)	Q3E7X9 [2]	RPS28A	8 kDa	TRUE	unknown	5540700000	539700000	4650200000	2094600000	4885700000	1011700000	5386700000	272130000	4683900000	684930000	6496900000	900260000	4222000000	2161600000	5761300000	1687200000	3098400000	2254000000	1	1	1	1	1	1	1	1	1	1	1	1	1	1	1	1	1	1	146	4	110	6	118	5	79	4
Exportin-1 OS=Saccharomyces cerevisiae (strain ATCC 204508 / S288c) OX=559292 GN=CRM1 PE=1 SV=1	P30822	CRM1	124 kDa		unknown	37131000	0	40165000	0	58160000	15701000	70345000	0	67354000	8875200	75016000	20618000	54394000	19610000	86538000	11943000	54864000	3355600	1	0	1	0.11	1	0.97	1	0.8	1	1	1	1	1	1	1	1	1	0.99	75	0	73	0	64	1	78	1
T-complex protein 1 subunit gamma OS=Saccharomyces cerevisiae (strain ATCC 204508 / S288c) OX=559292 GN=CCT3 PE=1 SV=2	P39077	CCT3	59 kDa		unknown	37968000	730990000	44198000	132030000	43804000	0	40071000	4935600	53801000	2888100	69538000	105410000	48406000	296280000	75593000	0	56316000	0	1	0.73	1	1	1	0.86	1	0.63	1	1	1	1	1	1	1	0.61	1	0.66	83	1	84	2	61	0	56	1
Cluster of Eukaryotic translation initiation factor 5A-1 OS=Saccharomyces cerevisiae (strain ATCC 204508 / S288c) OX=559292 GN=HYP2 PE=1 SV=3 (P23301)	P23301 [2]	HYP2	17 kDa	TRUE	unknown	494120000	0	422990000	0	403260000	-1	576460000	-1	398090000	0	569640000	-1	833850000	0	1005600000	-1	691250000	-1	1	0	1	0	1	0	1	0	1	0	1	0	1	0	1	0	1	0	91	0	85	0	73	0	60	0
Coatomer subunit alpha OS=Saccharomyces cerevisiae (strain ATCC 204508 / S288c) OX=559292 GN=COP1 PE=1 SV=2	P53622	COP1	136 kDa		unknown	15669000	0	24062000	0	25683000	0	26711000	0	48360000	0	48021000	0	28027000	0	27991000	0	31813000	0	1	0	1	0	1	0	1	0	1	0	1	0	1	0	1	0	1	0	71	0	75	0	70	0	59	0
Cluster of ADP,ATP carrier protein 2 OS=Saccharomyces cerevisiae (strain ATCC 204508 / S288c) OX=559292 GN=PET9 PE=1 SV=2 (P18239)	P18239 [2]	PET9	34 kDa	TRUE	unknown	231340000	0	270450000	108710000	317840000	187510000	310500000	188260000	350630000	114420000	323160000	179280000	262520000	141400000	370730000	111960000	341010000	69235000	1	0.72	1	1	1	1	1	1	1	1	1	1	1	1	1	1	1	1	91	0	90	8	82	10	61	7
Actin OS=Saccharomyces cerevisiae (strain ATCC 204508 / S288c) OX=559292 GN=ACT1 PE=1 SV=1	P60010	ACT1	42 kDa		unknown	95574000	2222400000	209240000	0	96151000	45081000	231310000	235510000	127390000	410290000	131770000	85218000	96690000	31728000	169450000	119680000	143010000	202230000	1	1	1	0	1	1	1	1	1	1	1	1	1	1	1	1	1	1	64	12	124	0	55	2	67	7
Eukaryotic translation initiation factor 3 subunit C OS=Saccharomyces cerevisiae (strain ATCC 204508 / S288c) OX=559292 GN=NIP1 PE=1 SV=2	P32497	NIP1	93 kDa		unknown	38962000	0	48817000	0	50975000	0	63152000	0	117090000	11923000	104070000	19357000	58348000	7573000	61016000	0	53816000	0	1	0	1	0	1	0	1	0.12	1	1	1	1	1	1	1	0	1	0.08	71	0	68	0	66	0	60	0
Myosin-2 OS=Saccharomyces cerevisiae (strain ATCC 204508 / S288c) OX=559292 GN=MYO2 PE=1 SV=1	P19524	MYO2	181 kDa	TRUE	unknown	5582700	0	6621000	0	5641200	10412000	8411800	4179800	9801700	6508200	12520000	16159000	9293600	2881400	14242000	43656000	9633100	49843000	1	0.72	1	0	1	0.91	1	0.91	1	0.99	1	0.99	1	0.98	1	0.74	1	0.99	72	0	72	0	59	3	59	2
Signal recognition particle subunit SRP68 OS=Saccharomyces cerevisiae (strain ATCC 204508 / S288c) OX=559292 GN=SRP68 PE=1 SV=1	P38687	SRP68	69 kDa		unknown	48993000	0	52247000	0	73297000	0	66270000	0	81537000	17391000	89107000	30567000	77065000	34092000	79791000	7725400	79005000	0	1	0	1	0	1	0	1	0.1	1	1	1	1	1	1	1	1	1	0	74	0	77	0	71	0	54	0
Eukaryotic translation initiation factor 3 subunit B OS=Saccharomyces cerevisiae (strain ATCC 204508 / S288c) OX=559292 GN=PRT1 PE=1 SV=1	P06103	PRT1	88 kDa		unknown	32095000	0	51550000	0	36830000	0	51077000	0	106360000	44640000	96063000	33759000	48260000	15407000	38848000	0	62536000	0	1	0	1	0	1	0	1	0.11	1	1	1	1	1	1	1	0	1	0	56	0	75	0	57	0	63	0
60S ribosomal export protein NMD3 OS=Saccharomyces cerevisiae (strain ATCC 204508 / S288c) OX=559292 GN=NMD3 PE=1 SV=3	P38861	NMD3	59 kDa		unknown	101980000	0	106750000	0	104260000	0	100740000	-1	215420000	0	165690000	0	145030000	0	198080000	0	129120000	0	1	0	1	0	1	0	1	0	1	0	1	0.11	1	0.18	1	0	1	0	70	0	66	0	76	0	71	0
ATP-dependent 6-phosphofructokinase subunit beta OS=Saccharomyces cerevisiae (strain ATCC 204508 / S288c) OX=559292 GN=PFK2 PE=1 SV=4	P16862	PFK2	105 kDa	TRUE	unknown	25152000	0	38022000	-1	30559000	0	36213000	0	116940000	71306000	84994000	21117000	33271000	1809900	39193000	0	37069000	0	1	0.17	1	0	1	0	1	0	1	1	1	1	1	1	1	0	1	0	59	0	69	0	53	0	50	0
Glycine--tRNA ligase 1, mitochondrial OS=Saccharomyces cerevisiae (strain ATCC 204508 / S288c) OX=559292 GN=GRS1 PE=1 SV=3	P38088	GRS1	78 kDa		unknown	23082000	0	28242000	0	28590000	34589000	31766000	0	62538000	0	63960000	8518900	31342000	7710000	99552000	23739000	60307000	0	1	0.16	1	0	1	0.66	1	0.33	1	0.96	1	1	1	1	1	1	1	0	61	0	63	0	55	1	51	0
Cluster of 60S ribosomal protein L33-A OS=Saccharomyces cerevisiae (strain ATCC 204508 / S288c) OX=559292 GN=RPL33A PE=1 SV=3 (P05744)	P05744 [2]	RPL33A	12 kDa	TRUE	unknown	4502300000	5135900000	4399400000	4377800000	4803500000	3053100000	5292900000	4614300000	5802300000	4376900000	6335100000	4358800000	5785800000	4607600000	4668800000	3167100000	5847500000	4695100000	1	1	1	1	1	1	1	1	1	1	1	1	1	1	1	1	1	1	87	13	79	21	97	19	58	15
T-complex protein 1 subunit theta OS=Saccharomyces cerevisiae (strain ATCC 204508 / S288c) OX=559292 GN=CCT8 PE=1 SV=1	P47079	CCT8	62 kDa		unknown	70840000	0	84062000	0	68794000	15314000	81773000	3457300	110490000	28431000	93637000	68268000	76652000	37359000	92998000	0	82038000	0	1	0	1	0.12	1	1	1	0.98	1	1	1	1	1	1	1	0.65	1	0	79	0	72	0	58	3	67	1
Nucleolar GTP-binding protein 2 OS=Saccharomyces cerevisiae (strain ATCC 204508 / S288c) OX=559292 GN=NOG2 PE=1 SV=1	P53742	NOG2	55 kDa		unknown	89138000	0	91261000	17702000	77857000	40050000	94492000	0	82193000	9134100	103550000	54575000	92720000	70769000	124200000	32996000	78533000	51973000	1	0	1	1	1	1	1	0	1	0.84	1	1	1	1	1	1	1	0.98	81	0	69	2	61	3	56	0
ATP-dependent RNA helicase DBP3 OS=Saccharomyces cerevisiae (strain ATCC 204508 / S288c) OX=559292 GN=DBP3 PE=1 SV=2	P20447	DBP3	59 kDa		unknown	139620000	0	133000000	0	74528000	0	105560000	0	77293000	0	141580000	18175000	105320000	5507400	94636000	0	90010000	0	1	0	1	0	1	0	1	0	1	0	1	1	1	1	1	0	1	0.16	93	0	93	0	67	0	62	0
Mitochondrial import receptor subunit TOM70 OS=Saccharomyces cerevisiae (strain ATCC 204508 / S288c) OX=559292 GN=TOM70 PE=1 SV=2	P07213	TOM70	70 kDa		unknown	42248000	0	43942000	0	54249000	0	62259000	0	80595000	0	69595000	0	56026000	5914200	67988000	0	61307000	0	1	0	1	0	1	0.08	1	0.08	1	0.71	1	0	1	1	1	0	1	0	72	0	60	0	68	0	66	0
CTP synthase 1 OS=Saccharomyces cerevisiae (strain ATCC 204508 / S288c) OX=559292 GN=URA7 PE=1 SV=2	P28274	URA7	65 kDa	TRUE	unknown	58383000	0	63662000	2205900	52050000	0	74222000	0	105540000	49848000	98931000	38207000	74088000	48867000	65029000	12494000	61192000	0	1	0	1	1	1	0	1	0	1	1	1	1	1	1	1	0.99	1	0	72	0	70	2	62	0	70	0
Coatomer subunit beta' OS=Saccharomyces cerevisiae (strain ATCC 204508 / S288c) OX=559292 GN=SEC27 PE=1 SV=1	P41811	SEC27	99 kDa		unknown	32554000	0	35915000	0	41504000	0	39806000	0	59667000	28392000	59953000	15945000	28483000	12504000	33248000	0	44675000	0	1	0	1	0	1	0	1	0	1	1	1	1	1	1	1	0.26	1	0	73	0	68	0	64	0	59	0
Cluster of Alcohol dehydrogenase 1 OS=Saccharomyces cerevisiae (strain ATCC 204508 / S288c) OX=559292 GN=ADH1 PE=1 SV=5 (P00330)	P00330 [2]	ADH1	37 kDa	TRUE	unknown	523580000	520130000	495980000	1167100000	393870000	793450000	403860000	280940000	687570000	829410000	561310000	635310000	422890000	481320000	387400000	320330000	476940000	323080000	1	1	1	1	1	1	1	1	1	1	1	1	1	1	1	1	1	1	66	10	64	25	47	12	41	13
Long-chain-fatty-acid--CoA ligase 4 OS=Saccharomyces cerevisiae (strain ATCC 204508 / S288c) OX=559292 GN=FAA4 PE=1 SV=1	P47912	FAA4	77 kDa	TRUE	unknown	81237000	0	79103000	0	72426000	0	92403000	0	101570000	19814000	126040000	90887000	106370000	83282000	205490000	61422000	115350000	0	1	0	1	0	1	0.28	1	0	1	0.99	1	1	1	1	1	1	1	0.95	74	0	66	0	54	0	52	0
Phosphoglycerate kinase OS=Saccharomyces cerevisiae (strain ATCC 204508 / S288c) OX=559292 GN=PGK1 PE=1 SV=2	P00560	PGK1	45 kDa		unknown	137180000	0	132250000	0	168570000	0	194680000	0	200840000	0	171880000	1566700	119480000	6633800	233300000	0	131490000	0	1	0	1	0	1	0	1	0	1	0	1	0.62	1	1	1	0	1	0	79	0	68	0	74	0	63	0
Phosphoglycerate mutase 1 OS=Saccharomyces cerevisiae (strain ATCC 204508 / S288c) OX=559292 GN=GPM1 PE=1 SV=3	P00950	GPM1	28 kDa		unknown	413630000	0	388930000	83867000	395380000	140690000	487890000	0	400730000	16973000	441180000	125240000	420190000	66893000	430040000	23869000	498390000	-1	1	0	1	1	1	1	1	0	1	0.79	1	1	1	1	1	1	1	0	81	0	83	4	81	4	62	0
Elongation factor 1-gamma 2 OS=Saccharomyces cerevisiae (strain ATCC 204508 / S288c) OX=559292 GN=TEF4 PE=1 SV=1	P36008	TEF4	47 kDa	TRUE	unknown	344780000	182040000	343720000	445940000	402120000	393810000	339430000	121340000	346360000	326930000	349650000	242200000	272710000	240710000	335900000	232280000	338980000	96784000	1	1	1	1	1	1	1	1	1	1	1	1	1	1	1	1	1	1	63	6	62	19	66	14	45	8
H/ACA ribonucleoprotein complex subunit CBF5 OS=Saccharomyces cerevisiae (strain ATCC 204508 / S288c) OX=559292 GN=CBF5 PE=1 SV=1	P33322	CBF5	55 kDa		unknown	165850000	0	178310000	0	135310000	0	141810000	0	175130000	0	195710000	0	138180000	0	55891000	0	167510000	0	1	0	1	0	1	0	1	0	1	0	1	0	1	0	1	0	1	0	92	0	78	0	69	0	64	0
Mitochondrial outer membrane protein porin 1 OS=Saccharomyces cerevisiae (strain ATCC 204508 / S288c) OX=559292 GN=POR1 PE=1 SV=4	P04840	POR1	30 kDa		unknown	144410000	0	408020000	0	347460000	0	2051300000	239360000	468700000	31082000	340940000	9880700	298330000	0	312850000	0	308510000	-1	1	0	1	0	1	0	1	1	1	0.67	1	0.92	1	0	1	0	1	0	55	0	75	0	68	0	154	11
rRNA biogenesis protein RRP5 OS=Saccharomyces cerevisiae (strain ATCC 204508 / S288c) OX=559292 GN=RRP5 PE=1 SV=1	Q05022	RRP5	193 kDa		unknown	8156000	0	9176500	0	4848800	0	7113700	0	7218100	99018000	7549300	0	7864300	0	17296000	0	6839700	0	1	0.3	1	0	1	0.08	1	0.57	1	0.57	1	0.21	1	0.26	1	0.07	1	0.39	76	0	80	0	43	0	54	1
Dihydrolipoyllysine-residue acetyltransferase component of pyruvate dehydrogenase complex, mitochondrial OS=Saccharomyces cerevisiae (strain ATCC 204508 / S288c) OX=559292 GN=LAT1 PE=1 SV=1	P12695	LAT1	52 kDa		unknown	172630000	0	187990000	83985000	216260000	500000000	265830000	185340000	224780000	362280000	214210000	248320000	243160000	284750000	114270000	36503000	183910000	69313000	1	0.99	1	1	1	1	1	1	1	1	1	1	1	1	1	1	1	1	74	1	63	10	66	14	44	9
Cluster of Transposon Ty1-DR2 Gag polyprotein OS=Saccharomyces cerevisiae (strain ATCC 204508 / S288c) OX=559292 GN=TY1A-DR2 PE=3 SV=1 (Q03964)	Q03964 [2]	TY1A-DR2	49 kDa	TRUE	unknown	51670000	0	56850000	0	72434000	0	246530000	0	134810000	0	92708000	0	183760000	0	187240000	0	170500000	0	1	0.53	1	0	1	0	1	0	1	0	1	0	1	0.9	1	0.09	1	0	83	2	79	0	72	0	66	0
Nuclear localization sequence-binding protein OS=Saccharomyces cerevisiae (strain ATCC 204508 / S288c) OX=559292 GN=NSR1 PE=1 SV=1	P27476	NSR1	45 kDa		unknown	251780000	0	255660000	0	155020000	155520000	191100000	63959000	176880000	34724000	208680000	0	122040000	4936400	179330000	0	166040000	0	1	0	1	0.97	1	0.97	1	0.98	1	1	1	0.94	1	0.67	1	0	1	0	83	0	80	2	58	2	44	3
Nucleolar protein 58 OS=Saccharomyces cerevisiae (strain ATCC 204508 / S288c) OX=559292 GN=NOP58 PE=1 SV=1	Q12499	NOP58	57 kDa	TRUE	unknown	157800000	0	173900000	0	119760000	0	175900000	0	91940000	0	170070000	2221700	79927000	0	102780000	0	111240000	0	1	0	1	0	1	0	1	0	1	0.31	1	0.96	1	0	1	0	1	0	85	0	84	0	63	0	70	0
RuvB-like protein 1 OS=Saccharomyces cerevisiae (strain ATCC 204508 / S288c) OX=559292 GN=RVB1 PE=1 SV=1	Q03940	RVB1	50 kDa		unknown	90271000	0	91135000	0	114270000	0	105030000	0	119630000	0	150660000	13259000	80193000	10545000	151050000	0	120080000	0	1	0	1	0.24	1	0	1	0.89	1	0.11	1	1	1	1	1	0.93	1	0	81	0	70	0	62	0	55	1
Polyadenylate-binding protein, cytoplasmic and nuclear OS=Saccharomyces cerevisiae (strain ATCC 204508 / S288c) OX=559292 GN=PAB1 PE=1 SV=4	P04147	PAB1	64 kDa		unknown	103210000	0	111040000	0	100020000	0	97067000	0	92496000	31555000	117620000	26397000	82775000	43161000	93974000	12407000	71299000	0	1	0	1	0.06	1	0.21	1	0	1	1	1	1	1	1	1	1	1	0.35	75	0	82	0	72	0	49	0
Ribosome assembly factor MRT4 OS=Saccharomyces cerevisiae (strain ATCC 204508 / S288c) OX=559292 GN=MRT4 PE=1 SV=1	P33201	MRT4	27 kDa		unknown	184220000	0	224570000	0	238730000	332120000	181610000	60944000	268850000	10818000	346480000	137160000	279040000	156740000	348380000	29123000	257980000	0	1	0	1	1	1	1	1	1	1	0.98	1	1	1	1	1	1	1	0	52	0	56	2	55	8	47	3
T-complex protein 1 subunit delta OS=Saccharomyces cerevisiae (strain ATCC 204508 / S288c) OX=559292 GN=CCT4 PE=1 SV=2	P39078	CCT4	58 kDa		unknown	56294000	0	65594000	25613000	54102000	40822000	79806000	0	106620000	37600000	93597000	58131000	67944000	34162000	50049000	17402000	71684000	0	1	0.19	1	0.93	1	1	1	0.22	1	1	1	1	1	1	1	1	1	0	67	0	68	1	53	4	61	0
Importin subunit beta-1 OS=Saccharomyces cerevisiae (strain ATCC 204508 / S288c) OX=559292 GN=KAP95 PE=1 SV=1	Q06142	KAP95	95 kDa		unknown	70299000	0	52238000	0	51230000	0	86394000	0	79128000	12673000	92153000	11173000	74598000	22306000	61313000	0	89539000	0	1	0.07	1	0.08	1	0.97	1	0	1	0.82	1	1	1	1	1	0.2	1	0	70	0	58	0	55	1	60	0
V-type proton ATPase subunit a, vacuolar isoform OS=Saccharomyces cerevisiae (strain ATCC 204508 / S288c) OX=559292 GN=VPH1 PE=1 SV=3	P32563	VPH1	96 kDa		unknown	60282000	0	82098000	0	44085000	0	239140000	0	78582000	0	73331000	0	46646000	0	96197000	0	57517000	0	1	0.11	1	0	1	0.1	1	0	1	0	1	0.06	1	0.87	1	0	1	0	71	0	71	0	51	0	99	0
[NU+] prion formation protein 1 OS=Saccharomyces cerevisiae (strain ATCC 204508 / S288c) OX=559292 GN=NEW1 PE=1 SV=1	Q08972	NEW1	134 kDa		unknown	6550200	0	12648000	0	11627000	0	11632000	0	18120000	0	18653000	0	10086000	0	14944000	0	15757000	0	1	0.8	1	0	1	0	1	0	1	0.11	1	0	1	0	1	0	1	0	55	1	58	0	53	0	52	0
Clathrin heavy chain OS=Saccharomyces cerevisiae (strain ATCC 204508 / S288c) OX=559292 GN=CHC1 PE=1 SV=1	P22137	CHC1	187 kDa		unknown	4522700	0	8556200	0	5325000	0	5876400	0	22519000	0	15342000	0	7675400	0	10067000	0	8732500	0	1	0.16	1	0	1	0	1	0	1	0	1	0	1	0	1	0.07	1	0	49	0	63	0	43	0	50	0
26S proteasome regulatory subunit RPN2 OS=Saccharomyces cerevisiae (strain ATCC 204508 / S288c) OX=559292 GN=RPN2 PE=1 SV=4	P32565	RPN2	104 kDa	TRUE	unknown	13593000	0	19392000	0	27335000	0	22339000	0	45623000	16426000	43359000	8782300	20884000	6003100	22130000	1411300	24024000	0	1	0.1	1	0	1	0	1	0	1	1	1	1	1	1	1	0.49	1	0	55	0	61	0	56	0	54	0
NET1-associated nuclear protein 1 OS=Saccharomyces cerevisiae (strain ATCC 204508 / S288c) OX=559292 GN=NAN1 PE=1 SV=1	Q02931	NAN1	101 kDa		unknown	41422000	-1	38738000	0	34688000	0	41433000	0	42847000	0	44237000	0	40135000	0	53140000	0	43085000	0	1	0	1	0	1	0	1	0	1	0	1	0	1	0	1	0	1	0	60	0	59	0	53	0	54	0
Proteasome component ECM29 OS=Saccharomyces cerevisiae (strain ATCC 204508 / S288c) OX=559292 GN=ECM29 PE=1 SV=1	P38737	ECM29	210 kDa		unknown	3140300	0	3731500	0	4270700	0	7520000	0	6583300	0	7195600	0	5113200	379560	7983900	0	6714500	0	1	0	1	0	1	0	1	0.09	1	0.08	1	0	1	0.91	1	0	1	0	63	0	50	0	54	0	67	0
Sulfite reductase [NADPH] flavoprotein component OS=Saccharomyces cerevisiae (strain ATCC 204508 / S288c) OX=559292 GN=MET10 PE=1 SV=2	P39692	MET10	115 kDa		unknown	8323500	0	8596200	0	24109000	0	23027000	0	29312000	0	24049000	0	18869000	3124000	32848000	0	19162000	0	1	0	1	0	1	0	1	0	1	0	1	0	1	1	1	0	1	0	53	0	42	0	63	0	58	0
RNA cytidine acetyltransferase OS=Saccharomyces cerevisiae (strain ATCC 204508 / S288c) OX=559292 GN=KRE33 PE=1 SV=1	P53914	KRE33	119 kDa		unknown	14957000	0	14042000	0	7029800	0	10299000	0	15951000	0	26036000	0	17811000	2429100	21182000	0	18475000	0	1	0.1	1	0	1	0.25	1	0.2	1	0	1	0.26	1	0.51	1	0	1	0	81	0	66	0	38	0	35	0
26S proteasome regulatory subunit RPN1 OS=Saccharomyces cerevisiae (strain ATCC 204508 / S288c) OX=559292 GN=RPN1 PE=1 SV=3	P38764	RPN1	109 kDa		unknown	16863000	0	16301000	0	24566000	0	19164000	0	49654000	26337000	39114000	17285000	21679000	15588000	34537000	1542800	27237000	0	1	0.15	1	0.17	1	0	1	0	1	1	1	1	1	1	1	1	1	0.42	54	0	52	0	50	0	41	0
RNA-binding protein SRO9 OS=Saccharomyces cerevisiae (strain ATCC 204508 / S288c) OX=559292 GN=SRO9 PE=1 SV=2	P25567	SRO9	48 kDa		unknown	125980000	0	129500000	8589100	103330000	0	157420000	-1	71597000	-1	95107000	0	83737000	0	57975000	0	120170000	0	1	0.09	1	0.83	1	0	1	0	1	0	1	0	1	0	1	0	1	0	91	0	68	1	61	0	61	0
Coatomer subunit beta OS=Saccharomyces cerevisiae (strain ATCC 204508 / S288c) OX=559292 GN=SEC26 PE=1 SV=2	P41810	SEC26	109 kDa		unknown	21246000	0	29662000	0	20319000	0	29835000	0	45326000	0	46715000	11920000	33386000	1905500	44503000	0	31942000	0	1	0	1	0	1	0	1	0	1	0	1	1	1	1	1	0	1	0	58	0	63	0	44	0	51	0
Cluster of Eukaryotic initiation factor 4F subunit p150 OS=Saccharomyces cerevisiae (strain ATCC 204508 / S288c) OX=559292 GN=TIF4631 PE=1 SV=2 (P39935)	P39935 [2]	TIF4631	107 kDa	TRUE	unknown	32538000	0	31949000	0	42619000	0	27727000	0	13939000	0	17808000	6519200	13298000	5996600	17575000	0	25860000	0	1	0.48	1	0.35	1	0	1	0.06	1	0.41	1	1	1	1	1	0.99	1	0.49	87	0	69	0	76	0	54	0
Long-chain-fatty-acid--CoA ligase 1 OS=Saccharomyces cerevisiae (strain ATCC 204508 / S288c) OX=559292 GN=FAA1 PE=1 SV=1	P30624	FAA1	78 kDa	TRUE	unknown	33093000	0	34758000	0	52480000	0	59746000	0	53908000	3716700	61503000	4170300	49273000	7394000	63317000	0	61103000	0	1	0.09	1	0	1	0.09	1	0	1	0.99	1	0.99	1	1	1	0.67	1	0	48	0	46	0	60	0	54	0
Probable metalloprotease ARX1 OS=Saccharomyces cerevisiae (strain ATCC 204508 / S288c) OX=559292 GN=ARX1 PE=1 SV=1	Q03862	ARX1	65 kDa		unknown	69019000	0	65532000	0	43526000	0	38818000	0	59702000	0	85715000	0	81349000	0	101640000	0	79490000	0	1	0	1	0	1	0	1	0	1	0	1	0	1	0	1	0	1	0	72	0	68	0	40	0	46	0
Translation initiation factor eIF-2B subunit epsilon OS=Saccharomyces cerevisiae (strain ATCC 204508 / S288c) OX=559292 GN=GCD6 PE=1 SV=1	P32501	GCD6	81 kDa		unknown	19373000	0	22517000	0	31209000	0	44458000	0	33293000	13343000	39496000	10998000	39819000	9819100	52268000	7085700	36268000	-1	1	0	1	0	1	0	1	0	1	0.98	1	1	1	1	1	0.97	1	0	66	0	58	0	62	0	59	0
ATP-dependent RNA helicase MSS116, mitochondrial OS=Saccharomyces cerevisiae (strain ATCC 204508 / S288c) OX=559292 GN=MSS116 PE=1 SV=1	P15424	MSS116	76 kDa		unknown	30710000	0	30814000	0	22683000	0	27311000	0	48828000	0	29195000	0	37404000	0	30005000	0	23237000	0	1	0	1	0	1	0	1	0.45	1	0	1	0	1	0.5	1	0	1	0	73	0	57	0	56	0	53	0
Nucleoporin NUP192 OS=Saccharomyces cerevisiae (strain ATCC 204508 / S288c) OX=559292 GN=NUP192 PE=1 SV=1	P47054	NUP192	192 kDa		unknown	3753300	0	4305500	0	4496600	0	11213000	0	11356000	0	11760000	0	8690100	0	13342000	0	8095200	0	1	0.14	1	0.14	1	0	1	0	1	0	1	0	1	0	1	0	1	0.16	43	0	41	0	43	0	62	0
ATP-dependent RNA helicase HAS1 OS=Saccharomyces cerevisiae (strain ATCC 204508 / S288c) OX=559292 GN=HAS1 PE=1 SV=1	Q03532	HAS1	57 kDa		unknown	74341000	0	86471000	0	67602000	0	44961000	0	70377000	0	88993000	12034000	76774000	10072000	80152000	1341400	55977000	0	1	0.14	1	0	1	0	1	0	1	0.63	1	1	1	1	1	0.5	1	0	72	0	73	0	56	0	40	0
Ribosome biogenesis protein YTM1 OS=Saccharomyces cerevisiae (strain ATCC 204508 / S288c) OX=559292 GN=YTM1 PE=1 SV=1	Q12024	YTM1	51 kDa		unknown	90596000	0	83762000	0	80591000	0	63448000	0	142510000	0	106060000	0	97748000	0	165800000	0	98937000	0	1	0	1	0	1	0	1	0.06	1	0	1	0	1	0.26	1	0	1	0	75	0	58	0	56	0	46	0
Importin subunit beta-3 OS=Saccharomyces cerevisiae (strain ATCC 204508 / S288c) OX=559292 GN=PSE1 PE=1 SV=2	P32337	PSE1	121 kDa		unknown	24103000	0	25156000	0	24342000	0	28699000	0	18181000	0	28815000	0	20754000	1339700	20177000	0	31808000	0	1	0.09	1	0	1	0	1	0.26	1	0	1	0	1	1	1	0	1	0	67	0	61	0	49	0	51	0
Essential nuclear protein 1 OS=Saccharomyces cerevisiae (strain ATCC 204508 / S288c) OX=559292 GN=ENP1 PE=1 SV=1	P38333	ENP1	55 kDa		unknown	61668000	0	54940000	4552300	69579000	40615000	77718000	6068200	55286000	73853000	63154000	98178000	50007000	70210000	53371000	23905000	80481000	0	1	0	1	0.63	1	1	1	1	1	1	1	1	1	1	1	1	1	0	56	0	52	1	49	3	52	1
Vesicular-fusion protein SEC18 OS=Saccharomyces cerevisiae (strain ATCC 204508 / S288c) OX=559292 GN=SEC18 PE=1 SV=2	P18759	SEC18	84 kDa		unknown	19366000	0	17789000	0	35694000	0	33084000	0	32386000	6603900	42655000	10458000	27913000	8388300	55078000	0	37181000	0	1	0.08	1	0	1	0.1	1	0.22	1	0.31	1	1	1	1	1	0.23	1	0.07	53	0	40	0	51	0	48	0
Signal recognition particle subunit SRP72 OS=Saccharomyces cerevisiae (strain ATCC 204508 / S288c) OX=559292 GN=SRP72 PE=1 SV=2	P38688	SRP72	74 kDa		unknown	36543000	0	34992000	0	45554000	0	53385000	0	64163000	20116000	67547000	16889000	59814000	12116000	76786000	0	55015000	0	1	0	1	0.91	1	0.13	1	0	1	1	1	1	1	1	1	0.14	1	0	67	0	52	1	44	0	44	0
Tubulin beta chain OS=Saccharomyces cerevisiae (strain ATCC 204508 / S288c) OX=559292 GN=TUB2 PE=1 SV=2	P02557	TUB2	51 kDa		unknown	141560000	-1	125550000	24880000	175970000	30930000	209310000	42144000	255370000	70998000	238660000	193490000	202440000	97089000	204460000	118010000	229050000	0	1	0	1	1	1	1	1	1	1	0.99	1	1	1	1	1	1	1	0.95	55	0	55	4	47	4	41	5
DNA-directed RNA polymerase I subunit RPA135 OS=Saccharomyces cerevisiae (strain ATCC 204508 / S288c) OX=559292 GN=RPA135 PE=1 SV=1	P22138	RPA135	136 kDa		unknown	7060100	0	8342300	0	8147500	0	7174000	0	28071000	0	23239000	0	10285000	490660	22876000	0	13991000	0	1	0	1	0	1	0	1	0	1	0	1	0	1	0.69	1	0	1	0	51	0	49	0	36	0	42	0
Endoplasmic reticulum chaperone BiP OS=Saccharomyces cerevisiae (strain ATCC 204508 / S288c) OX=559292 GN=KAR2 PE=1 SV=1	P16474	KAR2	74 kDa	TRUE	unknown	110470000	169720000	119430000	59333000	158010000	113960000	210650000	111140000	181410000	87644000	189530000	40863000	141880000	14453000	157990000	35113000	160360000	38537000	1	0.26	1	0.14	1	0.75	1	0.21	1	0.19	1	0.84	1	0.11	1	0.08	1	0.52	63	3	54	3	57	3	54	3
Protein SCP160 OS=Saccharomyces cerevisiae (strain ATCC 204508 / S288c) OX=559292 GN=SCP160 PE=1 SV=3	P06105	SCP160	135 kDa		unknown	31615000	70450000	41847000	0	53924000	0	9455600	74188000	62593000	0	12038000	0	61908000	0	18481000	0	9866200	0	1	0.95	1	0	1	0	1	0.67	1	0	1	0	1	0	1	0	1	0.32	45	1	49	0	32	0	50	1
Ribosome biogenesis protein MAK21 OS=Saccharomyces cerevisiae (strain ATCC 204508 / S288c) OX=559292 GN=MAK21 PE=1 SV=1	Q12176	MAK21	117 kDa		unknown	22499000	0	25148000	0	17185000	0	21102000	0	23378000	0	29615000	0	24122000	0	16448000	0	26601000	0	1	0	1	0	1	0	1	0	1	0	1	0	1	0	1	0.06	1	0	80	0	65	0	52	0	50	0
Phosphatidylinositol-3-phosphatase SAC1 OS=Saccharomyces cerevisiae (strain ATCC 204508 / S288c) OX=559292 GN=SAC1 PE=1 SV=1	P32368	SAC1	71 kDa		unknown	25974000	0	37076000	0	24213000	0	28383000	0	39622000	0	38584000	0	33050000	1086000	51830000	0	37889000	0	1	0.34	1	0	1	0	1	0	1	0	1	0	1	0.58	1	0	1	0	54	0	64	0	45	0	47	0
Adenosylhomocysteinase OS=Saccharomyces cerevisiae (strain ATCC 204508 / S288c) OX=559292 GN=SAH1 PE=1 SV=1	P39954	SAH1	49 kDa		unknown	154580000	0	281480000	99312000	88954000	0	74502000	0	269050000	105450000	197660000	114780000	161260000	60500000	120630000	8836800	113120000	0	1	0.99	1	1	1	0	1	0	1	1	1	1	1	1	1	1	1	0	53	1	60	8	46	0	36	0
Eukaryotic peptide chain release factor subunit 1 OS=Saccharomyces cerevisiae (strain ATCC 204508 / S288c) OX=559292 GN=SUP45 PE=1 SV=2	P12385	SUP45	49 kDa		unknown	51510000	0	48649000	0	56106000	0	43173000	-1	63304000	-1	85262000	12229000	60059000	18352000	109660000	7101000	92143000	0	1	0	1	0	1	0.35	1	0	1	0	1	1	1	1	1	1	1	0	51	0	53	0	41	0	35	0
Threonine dehydratase, mitochondrial OS=Saccharomyces cerevisiae (strain ATCC 204508 / S288c) OX=559292 GN=ILV1 PE=1 SV=2	P00927	ILV1	64 kDa		unknown	37559000	168810000	51350000	0	31180000	0	24032000	0	52528000	0	28619000	0	26822000	1997600	48213000	0	36316000	0	1	0.93	1	0	1	0	1	0.11	1	0	1	0	1	0.58	1	0	1	0.09	60	1	67	0	49	0	41	0
26S proteasome regulatory subunit 6A OS=Saccharomyces cerevisiae (strain ATCC 204508 / S288c) OX=559292 GN=RPT5 PE=1 SV=3	P33297	RPT5	48 kDa		unknown	19793000	0	17792000	0	39259000	0	36843000	-1	75836000	22927000	81654000	56182000	35319000	23706000	69986000	3616300	43712000	0	1	0	1	0	1	0.97	1	0	1	1	1	1	1	1	1	0.44	1	0	34	0	31	0	43	1	30	0
tRNA (guanosine(18)-2'-O)-methyltransferase OS=Saccharomyces cerevisiae (strain ATCC 204508 / S288c) OX=559292 GN=TRM3 PE=1 SV=1	Q07527	TRM3	165 kDa		unknown	2090700	0	4169800	0	3913300	0	5149400	0	11869000	0	12480000	0	5930500	0	8060000	0	5818900	0	1	0.12	1	0	1	0	1	0	1	0	1	0	1	0	1	0	1	0	33	0	53	0	41	0	43	0
rDNA transcriptional regulator POL5 OS=Saccharomyces cerevisiae (strain ATCC 204508 / S288c) OX=559292 GN=POL5 PE=1 SV=1	P39985	POL5	116 kDa		unknown	18024000	0	23068000	0	21779000	0	21344000	0	17424000	0	24209000	0	19227000	0	27557000	0	21547000	0	1	0	1	0	1	0	1	0	1	0	1	0.14	1	0.88	1	0.78	1	0	56	0	60	0	49	0	45	0
T-complex protein 1 subunit alpha OS=Saccharomyces cerevisiae (strain ATCC 204508 / S288c) OX=559292 GN=TCP1 PE=1 SV=2	P12612	TCP1	60 kDa		unknown	23749000	0	39640000	0	29618000	0	40303000	0	77837000	8751300	57111000	18274000	26232000	1216500	56437000	0	41298000	0	1	0	1	0	1	0	1	0	1	0.98	1	1	1	1	1	0	1	0	52	0	50	0	42	0	46	0
Fructose-bisphosphate aldolase OS=Saccharomyces cerevisiae (strain ATCC 204508 / S288c) OX=559292 GN=FBA1 PE=1 SV=3	P14540	FBA1	40 kDa		unknown	133760000	0	122700000	0	87888000	0	103130000	0	146840000	0	110770000	0	149460000	10366000	127110000	3679200	162430000	0	1	0	1	0	1	0.1	1	0	1	0	1	0	1	1	1	0.97	1	0	60	0	59	0	36	0	41	0
Pyruvate dehydrogenase E1 component subunit beta, mitochondrial OS=Saccharomyces cerevisiae (strain ATCC 204508 / S288c) OX=559292 GN=PDB1 PE=1 SV=2	P32473	PDB1	40 kDa		unknown	540420000	0	484850000	0	483580000	0	552850000	0	514100000	0	1332400000	56323000	562040000	144070000	436050000	0	447010000	0	1	0.06	1	0	1	0.23	1	0	1	0	1	1	1	1	1	0	1	0	66	0	58	0	56	0	50	0
3-hydroxy-3-methylglutaryl-coenzyme A reductase 1 OS=Saccharomyces cerevisiae (strain ATCC 204508 / S288c) OX=559292 GN=HMG1 PE=1 SV=1	P12683	HMG1	116 kDa	TRUE	unknown	28437000	0	27668000	0	31129000	0	46396000	0	48877000	16836000	44946000	7991900	31859000	16982000	62612000	2562900	40470000	0	1	0	1	0	1	0	1	0	1	0.99	1	1	1	1	1	1	1	0.16	57	0	47	0	36	0	51	0
DNA-directed RNA polymerase II subunit RPB2 OS=Saccharomyces cerevisiae (strain ATCC 204508 / S288c) OX=559292 GN=RPB2 PE=1 SV=2	P08518	RPB2	139 kDa		unknown	8176600	0	10449000	0	15874000	0	19219000	0	18155000	0	18976000	1801800	14655000	6848000	16033000	0	15081000	0	1	0.46	1	0.1	1	0.17	1	0	1	0.85	1	0.97	1	1	1	0	1	0	48	0	46	0	50	0	57	0
tRNA (guanine(26)-N(2))-dimethyltransferase, mitochondrial OS=Saccharomyces cerevisiae (strain ATCC 204508 / S288c) OX=559292 GN=TRM1 PE=1 SV=1	P15565	TRM1	64 kDa		unknown	34205000	0	36716000	0	38181000	0	39175000	0	33750000	0	32363000	0	49984000	0	50496000	0	40846000	20903000	1	0.39	1	0.15	1	0.29	1	0.09	1	0.48	1	0	1	0.22	1	0.79	1	0.69	55	0	60	0	55	0	51	0
Acyl-CoA desaturase 1 OS=Saccharomyces cerevisiae (strain ATCC 204508 / S288c) OX=559292 GN=OLE1 PE=1 SV=2	P21147	OLE1	58 kDa		unknown	44572000	0	47090000	0	51521000	0	129940000	0	84112000	0	81074000	0	49560000	4677500	97952000	0	74757000	0	1	0	1	0.07	1	0	1	0.07	1	0.38	1	0.13	1	0.88	1	0.13	1	0	61	0	54	0	40	0	64	0
DNA-directed RNA polymerases I and III subunit RPAC1 OS=Saccharomyces cerevisiae (strain ATCC 204508 / S288c) OX=559292 GN=RPC40 PE=1 SV=1	P07703	RPC40	38 kDa		unknown	71480000	0	79912000	-1	109740000	-1	147630000	-1	109040000	0	108730000	24054000	91505000	27166000	103440000	0	103820000	0	1	0	1	0	1	0	1	0	1	0.07	1	1	1	1	1	0.06	1	0	52	0	52	0	56	0	56	0
Protein translocation protein SEC63 OS=Saccharomyces cerevisiae (strain ATCC 204508 / S288c) OX=559292 GN=SEC63 PE=1 SV=2	P14906	SEC63	75 kDa		unknown	30324000	0	32118000	0	32326000	0	93536000	0	59803000	0	52533000	0	47871000	0	53455000	0	47569000	0	1	0.61	1	0	1	0	1	0	1	0	1	0	1	0	1	0	1	0	56	0	53	0	43	0	67	0
Importin beta SMX1 OS=Saccharomyces cerevisiae (strain ATCC 204508 / S288c) OX=559292 GN=SXM1 PE=1 SV=1	Q04175	SXM1	108 kDa		unknown	44070000	0	44483000	5608800	33391000	4428900	48835000	0	45136000	18371000	40818000	7622500	30729000	14081000	52474000	0	40511000	0	1	0	1	1	1	0.97	1	0	1	0.96	1	1	1	1	1	0	1	0.05	67	0	59	4	34	1	45	0
MICOS complex subunit MIC60 OS=Saccharomyces cerevisiae (strain ATCC 204508 / S288c) OX=559292 GN=MIC60 PE=1 SV=1	P36112	MIC60	61 kDa		unknown	24961000	0	28041000	0	33980000	0	45418000	0	61820000	0	43577000	0	42890000	0	53935000	0	45248000	0	1	0.07	1	0	1	0	1	0	1	0	1	0	1	0.98	1	0	1	0	44	0	45	0	48	0	54	0
Elongator complex protein 1 OS=Saccharomyces cerevisiae (strain ATCC 204508 / S288c) OX=559292 GN=IKI3 PE=1 SV=1	Q06706	IKI3	153 kDa		unknown	7564900	0	8381300	0	7710100	0	6807800	0	11519000	0	10944000	0	7997900	0	16865000	0	12593000	0	1	0	1	0	1	0	1	0	1	0	1	0	1	0	1	0	1	0	58	0	57	0	41	0	35	0
Carbamoyl-phosphate synthase arginine-specific large chain OS=Saccharomyces cerevisiae (strain ATCC 204508 / S288c) OX=559292 GN=CPA2 PE=1 SV=1	P03965	CPA2	124 kDa	TRUE	unknown	15305000	0	20156000	0	25321000	0	14449000	0	31523000	50700000	18633000	10626000	9083400	14342000	19962000	4908200	26291000	3376100	1	0	1	0.06	1	0	1	0.09	1	0.98	1	0.63	1	1	1	0.06	1	0.06	44	0	39	4	42	0	34	1
Ran GTPase-activating protein 1 OS=Saccharomyces cerevisiae (strain ATCC 204508 / S288c) OX=559292 GN=RNA1 PE=1 SV=2	P11745	RNA1	46 kDa		unknown	82730000	0	94139000	106520000	110760000	132410000	96673000	0	110800000	13761000	107010000	60009000	91790000	21178000	118040000	33983000	86983000	0	1	0.05	1	1	1	1	1	0	1	1	1	1	1	1	1	1	1	0	45	0	51	2	62	4	50	0
Superkiller protein 3 OS=Saccharomyces cerevisiae (strain ATCC 204508 / S288c) OX=559292 GN=SKI3 PE=1 SV=2	P17883	SKI3	164 kDa		unknown	1816500	0	2859000	14751000	2907500	0	3953600	0	6950400	0	8960000	0	6067100	0	8511100	0	4862800	0	1	0.59	1	0.87	1	0.11	1	0.33	1	0	1	0.32	1	0	1	0	1	0	33	0	37	2	35	0	40	0
Protein dopey OS=Saccharomyces cerevisiae (strain ATCC 204508 / S288c) OX=559292 GN=DOP1 PE=1 SV=1	Q03921	DOP1	195 kDa		unknown	2458100	0	2796900	0	7868400	8165300	8564300	916300000	9087000	0	8476900	4575700	4380900	567250	9065600	0	7298000	0	1	0.1	1	0.06	1	0.9	1	0.63	1	0.24	1	0.37	1	0.48	1	0.06	1	0	38	0	32	0	48	1	52	3
Nucleolar pre-ribosomal-associated protein 1 OS=Saccharomyces cerevisiae (strain ATCC 204508 / S288c) OX=559292 GN=URB1 PE=1 SV=2	P34241	URB1	203 kDa		unknown	5989300	419220000	5687700	610270000	3705500	29384000	5646700	217770000	3144400	63355000	7953500	25557000	4561500	11533000	2662000	22827000	4054000	37880000	1	0.96	1	0.98	1	0.78	1	0.92	1	0.77	1	0.64	1	1	1	0.69	1	0.94	61	3	54	5	40	2	43	3
Mannose-1-phosphate guanyltransferase OS=Saccharomyces cerevisiae (strain ATCC 204508 / S288c) OX=559292 GN=PSA1 PE=1 SV=2	P41940	PSA1	40 kDa		unknown	98834000	0	135360000	89761000	110190000	66224000	86408000	0	229290000	144490000	124930000	81966000	86308000	77314000	106180000	15220000	103070000	0	1	0.48	1	1	1	1	1	0	1	1	1	1	1	1	1	1	1	0	50	0	49	5	47	3	34	0
Nucleolar protein 4 OS=Saccharomyces cerevisiae (strain ATCC 204508 / S288c) OX=559292 GN=NOP4 PE=1 SV=1	P37838	NOP4	78 kDa		unknown	31777000	0	36027000	0	26525000	0	26117000	0	38200000	0	38146000	0	33515000	2985700	33028000	0	32322000	0	1	0	1	0	1	0	1	0	1	0	1	0.18	1	1	1	0	1	0.29	52	0	48	0	43	0	40	0
Nucleoporin NUP170 OS=Saccharomyces cerevisiae (strain ATCC 204508 / S288c) OX=559292 GN=NUP170 PE=1 SV=1	P38181	NUP170	169 kDa		unknown	4712300	0	5546400	0	7057500	0	7954400	0	7733900	0	8280000	0	8112000	0	10775000	0	7508300	0	1	0.06	1	0	1	0	1	0	1	0	1	0.09	1	0.34	1	0	1	0.46	51	0	43	0	43	0	46	0
Coatomer subunit gamma OS=Saccharomyces cerevisiae (strain ATCC 204508 / S288c) OX=559292 GN=SEC21 PE=1 SV=2	P32074	SEC21	105 kDa		unknown	32031000	0	20836000	0	18416000	0	20262000	0	39320000	0	33515000	0	19199000	0	21233000	0	29499000	0	1	0.05	1	0.32	1	0	1	0.07	1	0	1	0	1	0	1	0	1	0	45	0	44	0	46	0	42	0
T-complex protein 1 subunit eta OS=Saccharomyces cerevisiae (strain ATCC 204508 / S288c) OX=559292 GN=CCT7 PE=1 SV=1	P42943	CCT7	60 kDa		unknown	30838000	0	38109000	0	30155000	0	44669000	0	58794000	5367400	65209000	2891100	38238000	3514000	60529000	0	34484000	47867000	1	0	1	0	1	0	1	0	1	0.96	1	1	1	1	1	0	1	0.63	48	0	51	0	39	0	44	0
T-complex protein 1 subunit epsilon OS=Saccharomyces cerevisiae (strain ATCC 204508 / S288c) OX=559292 GN=CCT5 PE=1 SV=3	P40413	CCT5	62 kDa		unknown	25445000	0	38154000	0	31920000	0	31938000	0	71876000	20059000	62832000	19877000	42829000	22230000	52382000	5063300	34251000	0	1	0	1	0	1	0	1	0	1	0.99	1	1	1	1	1	0.84	1	0	47	0	50	0	37	0	38	0
T-complex protein 1 subunit zeta OS=Saccharomyces cerevisiae (strain ATCC 204508 / S288c) OX=559292 GN=CCT6 PE=1 SV=1	P39079	CCT6	60 kDa		unknown	26451000	0	37480000	0	33134000	0	33381000	0	55430000	0	63861000	31601000	39388000	16921000	41251000	0	31582000	0	1	0	1	0	1	0	1	0	1	0	1	1	1	1	1	0	1	0.19	49	0	44	0	42	0	39	0
Cluster of 40S ribosomal protein S26-A OS=Saccharomyces cerevisiae (strain ATCC 204508 / S288c) OX=559292 GN=RPS26A PE=1 SV=1 (P39938)	P39938 [2]	RPS26A	14 kDa	TRUE	unknown	3952500000	0	5072900000	0	6619000000	0	4739100000	0	2092000000	0	3370500000	0	3892100000	0	1807200000	0	4163200000	0	1	1	1	1	1	1	1	1	1	1	1	1	1	1	1	1	1	1	75	6	61	6	47	6	29	6
26S proteasome regulatory subunit 7 homolog OS=Saccharomyces cerevisiae (strain ATCC 204508 / S288c) OX=559292 GN=RPT1 PE=1 SV=1	P33299	RPT1	52 kDa		unknown	32134000	0	35900000	0	50696000	0	40104000	0	68277000	26354000	62052000	47506000	39380000	23320000	54090000	0	46751000	0	1	0	1	0	1	0	1	0	1	1	1	1	1	1	1	1	1	0.51	46	0	39	0	52	0	39	0
tRNA-aminoacylation cofactor ARC1 OS=Saccharomyces cerevisiae (strain ATCC 204508 / S288c) OX=559292 GN=ARC1 PE=1 SV=2	P46672	ARC1	42 kDa		unknown	112090000	0	142700000	7183300	111720000	0	119150000	0	147250000	0	110870000	0	96548000	10478000	93813000	0	109530000	-1	1	0	1	0.63	1	0	1	0	1	0	1	0.29	1	1	1	0	1	0	70	0	73	1	49	0	43	0
Tubulin alpha-3 chain OS=Saccharomyces cerevisiae (strain ATCC 204508 / S288c) OX=559292 GN=TUB3 PE=1 SV=1	P09734	TUB3	50 kDa	TRUE	unknown	66501000	0	82154000	0	67084000	68511000	100020000	0	79131000	0	110350000	52949000	92884000	25850000	146300000	58455000	126580000	0	1	0	1	0.92	1	1	1	0.35	1	0.1	1	0.87	1	0.81	1	0.42	1	0	43	0	44	3	46	6	49	0
Eukaryotic translation initiation factor 5B OS=Saccharomyces cerevisiae (strain ATCC 204508 / S288c) OX=559292 GN=FUN12 PE=1 SV=2	P39730	FUN12	112 kDa		unknown	17287000	0	22336000	0	18488000	0	27014000	0	21979000	0	11649000	0	17430000	0	14781000	0	16414000	0	1	0	1	0	1	0	1	0	1	0	1	0	1	0	1	0	1	0	56	0	55	0	56	0	56	0
U3 small nucleolar RNA-associated protein 22 OS=Saccharomyces cerevisiae (strain ATCC 204508 / S288c) OX=559292 GN=UTP22 PE=1 SV=1	P53254	UTP22	140 kDa		unknown	8340800	0	8196500	0	5416400	0	8023700	0	8569200	0	9636900	0	11671000	0	11045000	-1	7791700	0	1	0	1	0	1	0	1	0	1	0	1	0	1	0	1	0	1	0	61	0	45	0	38	0	39	0
26S proteasome regulatory subunit 6B homolog OS=Saccharomyces cerevisiae (strain ATCC 204508 / S288c) OX=559292 GN=RPT3 PE=1 SV=2	P33298	RPT3	48 kDa	TRUE	unknown	24798000	0	27010000	0	18992000	0	33020000	0	107540000	0	83751000	21984000	53686000	20714000	80044000	0	73815000	0	1	0	1	0	1	0	1	0.13	1	0	1	1	1	1	1	0	1	0	39	0	41	0	27	0	36	0
Cluster of Low-affinity glucose transporter HXT3 OS=Saccharomyces cerevisiae (strain ATCC 204508 / S288c) OX=559292 GN=HXT3 PE=1 SV=1 (P32466)	P32466 [9]	HXT3	63 kDa	TRUE	unknown	16915000	0	19843000	0	21611000	0	31514000	0	36460000	59300000	29687000	33851000	17044000	49320000	62390000	315540000	19303000	0	1	0.11	1	0	1	0	1	0.07	1	1	1	1	1	1	1	1	1	0.71	34	0	29	0	36	0	47	0
Nuclear migration protein NUM1 OS=Saccharomyces cerevisiae (strain ATCC 204508 / S288c) OX=559292 GN=NUM1 PE=1 SV=2	Q00402	NUM1	313 kDa		unknown	8980700	0	6813800	0	4449000	0	7638400	0	12240000	0	6379700	0	5226100	0	5309100	0	8058800	0	1	0.28	1	0	1	0	1	0.12	1	0	1	0	1	0.11	1	0	1	0	53	0	47	0	28	0	47	0
Import motor subunit, mitochondrial OS=Saccharomyces cerevisiae (strain ATCC 204508 / S288c) OX=559292 GN=SSC1 PE=1 SV=1	P0CS90	SSC1	71 kDa	TRUE	unknown	38659000	0	43076000	0	43129000	0	56208000	0	53344000	0	57121000	0	46326000	0	32357000	0	66079000	0	1	0	1	0	1	0	1	0	1	0	1	0	1	0	1	0	1	0	57	0	51	0	37	0	46	0
Ribosome-interacting GTPase 1 OS=Saccharomyces cerevisiae (strain ATCC 204508 / S288c) OX=559292 GN=RBG1 PE=1 SV=1	P39729	RBG1	41 kDa		unknown	106800000	0	106610000	0	99491000	0	102140000	0	107010000	0	94748000	0	114170000	0	104760000	0	101280000	0	1	0	1	0	1	0	1	0.21	1	0	1	0	1	0	1	0	1	0	69	0	61	0	44	0	48	0
Valine--tRNA ligase, mitochondrial OS=Saccharomyces cerevisiae (strain ATCC 204508 / S288c) OX=559292 GN=VAS1 PE=1 SV=2	P07806	VAS1	126 kDa		unknown	5684000	0	6551800	0	5745000	0	7900400	0	11817000	0	11966000	0	9964100	0	13018000	0	10501000	0	1	0	1	0	1	0	1	0	1	0	1	0	1	0.06	1	0	1	0	40	0	34	0	35	0	43	0
ABC transporter ATP-binding protein ARB1 OS=Saccharomyces cerevisiae (strain ATCC 204508 / S288c) OX=559292 GN=ARB1 PE=1 SV=1	P40024	ARB1	68 kDa		unknown	43552000	0	32342000	0	39591000	0	45284000	0	56901000	0	88480000	4764300	53932000	0	129400000	0	90323000	0	1	0.07	1	0	1	0	1	0.08	1	0	1	1	1	0.99	1	0.59	1	0	45	0	33	0	40	0	34	0
Eukaryotic translation initiation factor 3 subunit I OS=Saccharomyces cerevisiae (strain ATCC 204508 / S288c) OX=559292 GN=TIF34 PE=1 SV=1	P40217	TIF34	39 kDa		unknown	56073000	0	73828000	0	57456000	-1	58894000	-1	122500000	6132800	117170000	43936000	75054000	12170000	51899000	-1	68635000	0	1	0.08	1	0	1	0	1	0	1	0.67	1	1	1	1	1	0	1	0.09	55	0	52	0	37	0	33	0
Dihydrolipoyl dehydrogenase, mitochondrial OS=Saccharomyces cerevisiae (strain ATCC 204508 / S288c) OX=559292 GN=LPD1 PE=1 SV=1	P09624	LPD1	54 kDa		unknown	29465000	0	26195000	0	41374000	0	59221000	0	59007000	0	56427000	0	65377000	7118400	28480000	0	53695000	0	1	0.13	1	0	1	0	1	0	1	0	1	0	1	1	1	0	1	0	50	0	41	0	40	0	44	0
Cystathionine beta-synthase OS=Saccharomyces cerevisiae (strain ATCC 204508 / S288c) OX=559292 GN=CYS4 PE=1 SV=1	P32582	CYS4	56 kDa		unknown	20785000	0	32079000	0	17145000	0	17754000	0	28766000	0	38523000	0	17051000	0	37181000	0	35547000	0	1	0	1	0	1	0	1	0	1	0	1	0	1	0	1	0	1	0.05	48	0	53	0	37	0	37	0
Isoleucine--tRNA ligase, cytoplasmic OS=Saccharomyces cerevisiae (strain ATCC 204508 / S288c) OX=559292 GN=ILS1 PE=1 SV=1	P09436	ILS1	123 kDa		unknown	4245000	0	5383800	0	5196100	0	9568100	0	12769000	0	11918000	0	8191900	0	13624000	0	11367000	0	1	0.07	1	0	1	0	1	0	1	0	1	0	1	0	1	0	1	0.05	32	0	34	0	30	0	47	0
Serine palmitoyltransferase 1 OS=Saccharomyces cerevisiae (strain ATCC 204508 / S288c) OX=559292 GN=LCB1 PE=1 SV=2	P25045	LCB1	62 kDa		unknown	41344000	0	34223000	0	28216000	0	37781000	-1	40594000	0	61408000	0	47409000	0	65901000	0	50308000	0	1	0	1	0	1	0	1	0	1	0	1	0	1	1	1	0	1	0	57	0	43	0	34	0	35	0
Ribosome biogenesis protein BMS1 OS=Saccharomyces cerevisiae (strain ATCC 204508 / S288c) OX=559292 GN=BMS1 PE=1 SV=1	Q08965	BMS1	136 kDa		unknown	12128000	0	13054000	0	9030300	0	10943000	0	6153900	0	12894000	0	13496000	0	17529000	0	11931000	0	1	0.64	1	0	1	0	1	0.07	1	0	1	0	1	0	1	0.1	1	0	55	0	53	0	34	0	34	0
DNA-directed RNA polymerase I subunit RPA190 OS=Saccharomyces cerevisiae (strain ATCC 204508 / S288c) OX=559292 GN=RPA190 PE=1 SV=2	P10964	RPA190	186 kDa	TRUE	unknown	3347900	0	4072200	0	3900600	0	3714300	0	14917000	0	12346000	0	4808900	0	6646600	0	5815600	0	1	0.14	1	0	1	0	1	0	1	0.27	1	0.12	1	0.12	1	0	1	0.15	39	0	35	0	33	0	31	0
Acetyl-coenzyme A synthetase 2 OS=Saccharomyces cerevisiae (strain ATCC 204508 / S288c) OX=559292 GN=ACS2 PE=1 SV=1	P52910	ACS2	75 kDa		unknown	17293000	0	24148000	0	133650000	0	25833000	0	58757000	3955900	46659000	1692900	47383000	2977300	64276000	0	33810000	0	1	0.22	1	0	1	0	1	0	1	0.45	1	0.99	1	1	1	0	1	0	34	0	37	0	37	0	40	0
Nucleoporin NUP157 OS=Saccharomyces cerevisiae (strain ATCC 204508 / S288c) OX=559292 GN=NUP157 PE=1 SV=1	P40064	NUP157	157 kDa		unknown	3866900	0	3801800	0	4562700	4292100000	7289400	0	9331600	0	6975900	0	5691700	0	10411000	0	4789500	0	1	0.5	1	0.26	1	0.89	1	0.26	1	0.21	1	0	1	0.06	1	0.13	1	0.36	27	0	36	0	35	1	39	0
Tubulin alpha-1 chain OS=Saccharomyces cerevisiae (strain ATCC 204508 / S288c) OX=559292 GN=TUB1 PE=1 SV=2	P09733	TUB1	50 kDa	TRUE	unknown	74034000	0	89971000	0	72568000	65951000	125190000	0	120980000	37973000	168050000	98828000	127720000	48561000	168970000	70326000	134850000	0	1	0	1	0.11	1	1	1	0	1	1	1	1	1	1	1	0.99	1	0	31	0	38	1	37	4	45	0
Cytochrome b-c1 complex subunit 2, mitochondrial OS=Saccharomyces cerevisiae (strain ATCC 204508 / S288c) OX=559292 GN=QCR2 PE=1 SV=1	P07257	QCR2	40 kDa		unknown	19919000	0	21446000	0	59783000	0	495290000	0	55615000	0	47570000	0	41655000	-1	36883000	0	40051000	0	1	0	1	0	1	0	1	0	1	0	1	0	1	0	1	0	1	0	35	0	33	0	42	0	87	0
C-1-tetrahydrofolate synthase, mitochondrial OS=Saccharomyces cerevisiae (strain ATCC 204508 / S288c) OX=559292 GN=MIS1 PE=1 SV=1	P09440	MIS1	106 kDa	TRUE	unknown	12737000	0	15698000	0	12685000	0	14633000	0	24416000	0	13658000	0	13712000	0	13110000	0	13649000	0	1	0	1	0.07	1	0	1	0	1	0	1	0.09	1	0	1	0.1	1	0	56	0	57	0	38	0	38	0
Magnesium-activated aldehyde dehydrogenase, cytosolic OS=Saccharomyces cerevisiae (strain ATCC 204508 / S288c) OX=559292 GN=ALD6 PE=1 SV=4	P54115	ALD6	54 kDa		unknown	25593000	0	25804000	0	21073000	-1	16844000	-1	29064000	0	31668000	0	41439000	0	40848000	0	50359000	0	1	0	1	0	1	0	1	0	1	0	1	0	1	0	1	0	1	0	42	0	36	0	26	0	32	0
40S ribosomal protein S29-B OS=Saccharomyces cerevisiae (strain ATCC 204508 / S288c) OX=559292 GN=RPS29B PE=1 SV=3	P41058	RPS29B	7 kDa	TRUE	unknown	2181100000	435060000	2289700000	1525300000	1159000000	347940000	2338700000	1207400000	2313200000	0	1567500000	439170000	2050700000	289210000	1423500000	152650000	1531400000	2416900000	1	0.19	1	0.92	1	0.92	1	0.94	1	0	1	0.99	1	1	1	0.06	1	0.1	29	3	30	7	77	7	42	4
Translation initiation factor eIF-2B subunit gamma OS=Saccharomyces cerevisiae (strain ATCC 204508 / S288c) OX=559292 GN=GCD1 PE=1 SV=3	P09032	GCD1	66 kDa		unknown	24698000	0	22410000	0	25438000	0	36851000	0	28523000	0	39796000	0	36842000	0	50094000	0	33268000	0	1	0.08	1	0	1	0	1	0	1	0.14	1	0	1	0	1	0	1	0	47	0	44	0	37	0	40	0
DNA topoisomerase 2 OS=Saccharomyces cerevisiae (strain ATCC 204508 / S288c) OX=559292 GN=TOP2 PE=1 SV=2	P06786	TOP2	164 kDa		unknown	6114700	0	5637300	0	4886200	0	7629400	0	5411400	0	8616700	0	3125300	0	10102000	0	5328100	0	1	0	1	0	1	0.1	1	0	1	0	1	0	1	0	1	0	1	0	53	0	41	0	43	0	40	0
40S ribosomal protein S29-A OS=Saccharomyces cerevisiae (strain ATCC 204508 / S288c) OX=559292 GN=RPS29A PE=1 SV=3	P41057	RPS29A	7 kDa	TRUE	unknown	1964200000	435060000	2072400000	1463400000	806920000	347940000	2065700000	1099200000	2049000000	0	1255200000	374940000	1853800000	271660000	1227300000	152650000	1381100000	2416900000	1	0.3	1	0.91	1	0.11	1	0.2	1	0	1	0.65	1	0.96	1	0.11	1	0.39	32	3	31	6	80	6	41	3
Tricalbin-1 OS=Saccharomyces cerevisiae (strain ATCC 204508 / S288c) OX=559292 GN=TCB1 PE=1 SV=1	Q12466	TCB1	134 kDa	TRUE	unknown	9015500	0	5584800	0	6801400	0	12621000	0	8630100	0	12591000	0	9156100	2187900	20973000	0	13488000	0	1	0	1	0	1	0.85	1	0.17	1	0.06	1	0	1	1	1	0.88	1	0.3	47	0	29	0	29	0	41	0
Tricalbin-3 OS=Saccharomyces cerevisiae (strain ATCC 204508 / S288c) OX=559292 GN=TCB3 PE=1 SV=1	Q03640	TCB3	171 kDa		unknown	5309100	0	3240500	0	4781300	0	8368300	0	11627000	28271000	10380000	0	8408100	0	11480000	0	8492400	0	1	0	1	0	1	0	1	0	1	0.65	1	0	1	0	1	0.25	1	0	44	0	30	0	34	0	44	0
Threonine--tRNA ligase, cytoplasmic OS=Saccharomyces cerevisiae (strain ATCC 204508 / S288c) OX=559292 GN=THS1 PE=1 SV=2	P04801	THS1	85 kDa		unknown	11552000	0	14500000	0	14942000	0	16945000	0	50484000	17575000	39348000	7312100	13027000	3416200	19051000	0	21958000	0	1	0.08	1	0	1	0	1	0	1	1	1	1	1	1	1	0.08	1	0	37	0	42	0	32	0	35	0
rRNA-processing protein EBP2 OS=Saccharomyces cerevisiae (strain ATCC 204508 / S288c) OX=559292 GN=EBP2 PE=1 SV=1	P36049	EBP2	50 kDa		unknown	41024000	0	49203000	0	38415000	0	34828000	0	57265000	0	52114000	0	58066000	0	24546000	0	45307000	0	1	0	1	0	1	0	1	0	1	0	1	0	1	0	1	0	1	0	63	0	61	0	46	0	29	0
Antiviral helicase SKI2 OS=Saccharomyces cerevisiae (strain ATCC 204508 / S288c) OX=559292 GN=SKI2 PE=1 SV=2	P35207	SKI2	146 kDa		unknown	1610000	0	1720000	0	3030700	0	4483800	0	11000000	0	9665100	0	5121500	0	8985900	0	4342700	0	1	0.36	1	0.1	1	0	1	0.11	1	0.21	1	0	1	0.75	1	0.07	1	0	25	0	20	0	23	0	24	0
T-complex protein 1 subunit beta OS=Saccharomyces cerevisiae (strain ATCC 204508 / S288c) OX=559292 GN=CCT2 PE=1 SV=1	P39076	CCT2	57 kDa		unknown	15835000	0	17825000	0	9693300	0	14927000	0	25735000	0	20710000	0	19545000	0	18577000	0	15668000	0	1	0.41	1	0.11	1	0.59	1	0.07	1	0	1	0	1	0	1	0	1	0	40	0	44	0	34	0	35	0
26S proteasome subunit RPT4 OS=Saccharomyces cerevisiae (strain ATCC 204508 / S288c) OX=559292 GN=RPT4 PE=1 SV=4	P53549	RPT4	49 kDa	TRUE	unknown	18143000	0	17853000	0	14655000	0	26171000	0	78345000	15152000	53134000	75887000	37531000	29136000	69138000	10969000	43939000	0	1	0	1	0	1	0.78	1	0	1	0.63	1	1	1	1	1	0.9	1	0	34	0	32	0	20	0	23	0
ATP-dependent RNA helicase MAK5 OS=Saccharomyces cerevisiae (strain ATCC 204508 / S288c) OX=559292 GN=MAK5 PE=1 SV=1	P38112	MAK5	87 kDa		unknown	26929000	0	21959000	0	8149600	0	16731000	-1	20197000	0	23574000	0	19388000	0	28782000	0	13328000	0	1	0	1	0	1	0	1	0	1	0	1	0	1	0	1	0	1	0	65	0	45	0	22	0	32	0
Protein SDA1 OS=Saccharomyces cerevisiae (strain ATCC 204508 / S288c) OX=559292 GN=SDA1 PE=1 SV=1	P53313	SDA1	87 kDa	TRUE	unknown	15977000	0	11841000	0	11226000	0	22177000	0	23408000	0	33567000	0	30394000	3167100	25146000	0	24252000	0	1	0	1	0	1	0	1	0	1	0	1	0	1	1	1	0	1	0	50	0	31	0	33	0	41	0
Ribosome biogenesis ATPase RIX7 OS=Saccharomyces cerevisiae (strain ATCC 204508 / S288c) OX=559292 GN=RIX7 PE=1 SV=1	Q07844	RIX7	93 kDa	TRUE	unknown	10191000	0	14829000	0	10832000	0	12482000	0	13666000	0	17890000	0	15272000	0	15116000	0	18165000	0	1	0.42	1	0	1	0	1	0	1	0	1	0	1	0	1	0	1	0.06	44	0	47	0	38	0	42	0
Periodic tryptophan protein 2 OS=Saccharomyces cerevisiae (strain ATCC 204508 / S288c) OX=559292 GN=PWP2 PE=1 SV=2	P25635	PWP2	104 kDa		unknown	12063000	0	12364000	0	9797800	0	13496000	0	11571000	0	19790000	0	14495000	0	13468000	0	15488000	0	1	0	1	0	1	0	1	0	1	0	1	0	1	0	1	0	1	0	54	0	44	0	38	0	37	0
Nucleolar protein 12 OS=Saccharomyces cerevisiae (strain ATCC 204508 / S288c) OX=559292 GN=NOP12 PE=1 SV=1	Q08208	NOP12	52 kDa		unknown	53599000	0	54634000	0	40155000	-1	39072000	0	47382000	0	27423000	0	31091000	0	38168000	0	40184000	0	1	0	1	0	1	0	1	0	1	0	1	0	1	0	1	0	1	0	63	0	57	0	38	0	28	0
60S ribosomal protein L34-B OS=Saccharomyces cerevisiae (strain ATCC 204508 / S288c) OX=559292 GN=RPL34B PE=1 SV=1	P40525	RPL34B	14 kDa		unknown	3219300000	2986100000	3062000000	2501500000	3354100000	1686800000	3170100000	3102700000	2182400000	2148500000	3951700000	1799100000	4405000000	1596100000	3270100000	1711400000	4098000000	1774300000	1	1	1	1	1	1	1	1	1	1	1	1	1	1	1	1	1	0.94	58	7	50	6	55	7	25	6
Nonsense-mediated mRNA decay protein 5 OS=Saccharomyces cerevisiae (strain ATCC 204508 / S288c) OX=559292 GN=NMD5 PE=1 SV=2	P46970	NMD5	120 kDa		unknown	7224200	0	8720200	0	12660000	2240700	16554000	0	13434000	0	14572000	0	12762000	517810	24527000	0	12854000	0	1	0	1	0	1	0.87	1	0.37	1	0.2	1	0	1	0.95	1	0	1	0	31	0	32	0	41	1	39	0
U3 small nucleolar RNA-associated protein 8 OS=Saccharomyces cerevisiae (strain ATCC 204508 / S288c) OX=559292 GN=UTP8 PE=1 SV=1	P53276	UTP8	80 kDa		unknown	25536000	0	31233000	0	32859000	-1	40543000	0	34134000	0	55304000	0	35861000	0	47221000	0	39092000	0	1	0.06	1	0.13	1	0	1	0	1	0	1	0	1	0	1	0	1	0	45	0	37	0	39	0	39	0
25S rRNA (cytosine(2870)-C(5))-methyltransferase OS=Saccharomyces cerevisiae (strain ATCC 204508 / S288c) OX=559292 GN=NOP2 PE=1 SV=1	P40991	NOP2	70 kDa		unknown	43842000	0	60510000	0	42094000	0	45086000	0	62468000	0	47456000	0	39265000	0	39623000	0	31433000	0	1	0.25	1	0.45	1	0	1	0	1	0	1	0	1	0	1	0	1	0	52	0	55	1	40	0	39	0
Cluster of Heat shock protein homolog SSE1 OS=Saccharomyces cerevisiae (strain ATCC 204508 / S288c) OX=559292 GN=SSE1 PE=1 SV=4 (P32589)	P32589 [2]	SSE1	77 kDa	TRUE	unknown	11950000	0	12331000	0	18934000	0	33219000	0	49690000	0	23247000	0	20814000	0	18990000	0	17210000	-1	1	0.97	1	0.08	1	0.69	1	0.05	1	0	1	0	1	0.09	1	0	1	0	45	2	35	0	39	0	42	0
V-type proton ATPase subunit d OS=Saccharomyces cerevisiae (strain ATCC 204508 / S288c) OX=559292 GN=VMA6 PE=1 SV=2	P32366	VMA6	40 kDa		unknown	67408000	-1	96427000	0	65055000	0	224170000	0	101450000	-1	91761000	5208400	113480000	0	153980000	0	77117000	-1	1	0	1	0	1	0	1	0	1	0	1	0.92	1	0	1	0	1	0	43	0	48	0	36	0	52	0
26S proteasome regulatory subunit 4 homolog OS=Saccharomyces cerevisiae (strain ATCC 204508 / S288c) OX=559292 GN=RPT2 PE=1 SV=3	P40327	RPT2	49 kDa		unknown	24486000	0	27657000	0	26832000	0	36590000	0	90124000	25346000	97756000	33054000	52118000	16950000	66070000	3514500	61177000	0	1	0.06	1	0.06	1	0.08	1	0.22	1	1	1	1	1	1	1	0.97	1	0.11	23	0	28	0	27	0	27	0
Importin alpha re-exporter OS=Saccharomyces cerevisiae (strain ATCC 204508 / S288c) OX=559292 GN=CSE1 PE=1 SV=2	P33307	CSE1	109 kDa		unknown	10881000	0	11370000	0	10802000	0	12207000	0	17948000	0	14512000	0	10921000	0	14371000	0	17514000	0	1	0	1	0	1	0	1	0	1	0	1	0.05	1	0	1	0	1	0	39	0	39	0	34	0	34	0
Cyclin-dependent kinase 1 OS=Saccharomyces cerevisiae (strain ATCC 204508 / S288c) OX=559292 GN=CDC28 PE=1 SV=1	P00546	CDC28	34 kDa	TRUE	unknown	31136000	0	32293000	0	57971000	0	60662000	0	55356000	-1	64579000	0	45900000	10790000	78158000	0	58470000	0	1	0.06	1	0	1	0	1	0	1	0	1	0	1	1	1	0	1	0	41	0	37	0	41	0	41	0
Phosphatidylethanolamine N-methyltransferase OS=Saccharomyces cerevisiae (strain ATCC 204508 / S288c) OX=559292 GN=CHO2 PE=1 SV=1	P05374	CHO2	101 kDa		unknown	6663900	0	6599400	0	18881000	0	19211000	4122600	13622000	0	19558000	992980	12494000	0	26437000	0	12678000	0	1	0.06	1	0	1	0.68	1	0.71	1	0.1	1	0.57	1	0	1	0	1	0.07	27	0	25	0	40	0	39	1
27S pre-rRNA (guanosine(2922)-2'-O)-methyltransferase OS=Saccharomyces cerevisiae (strain ATCC 204508 / S288c) OX=559292 GN=SPB1 PE=1 SV=2	P25582	SPB1	96 kDa		unknown	22772000	0	29166000	0	9027600	0	13680000	0	21940000	0	18450000	0	24599000	0	24976000	0	16910000	0	1	0.17	1	0	1	0	1	0	1	0	1	0	1	0	1	0	1	0	47	0	51	0	23	0	30	0
Aspartate--tRNA ligase, cytoplasmic OS=Saccharomyces cerevisiae (strain ATCC 204508 / S288c) OX=559292 GN=DPS1 PE=1 SV=3	P04802	DPS1	64 kDa		unknown	7879300	0	10775000	0	15824000	0	20159000	0	56389000	0	33338000	0	18244000	0	22075000	0	20219000	0	1	0.2	1	0	1	0.06	1	0	1	0	1	0	1	0	1	0	1	0	30	0	39	0	33	0	33	0
Proteasome-interacting protein CIC1 OS=Saccharomyces cerevisiae (strain ATCC 204508 / S288c) OX=559292 GN=CIC1 PE=1 SV=1	P38779	CIC1	43 kDa		unknown	53999000	0	77380000	0	56721000	0	67982000	0	68842000	0	69007000	0	90253000	1493800	66323000	0	75078000	0	1	0.34	1	0	1	0	1	0	1	0	1	0	1	0.58	1	0	1	0	53	0	50	0	44	0	37	0
Ribosome assembly protein RRB1 OS=Saccharomyces cerevisiae (strain ATCC 204508 / S288c) OX=559292 GN=RRB1 PE=1 SV=1	Q04225	RRB1	57 kDa		unknown	68587000	0	73249000	0	50848000	0	68206000	0	79362000	0	84615000	0	74503000	0	67876000	0	65545000	0	1	0.14	1	0	1	0	1	0	1	0.32	1	0	1	0	1	0	1	0	45	0	45	0	39	0	40	0
Multisite-specific tRNA:(cytosine-C(5))-methyltransferase OS=Saccharomyces cerevisiae (strain ATCC 204508 / S288c) OX=559292 GN=NCL1 PE=1 SV=1	P38205	NCL1	78 kDa		unknown	10637000	0	10895000	0	7761900	0	10668000	0	23903000	0	14111000	0	13993000	0	20947000	0	12033000	0	1	0	1	0	1	0	1	0.14	1	0	1	0	1	0	1	0	1	0.22	40	0	36	0	26	0	33	0
40S ribosomal protein S27-A OS=Saccharomyces cerevisiae (strain ATCC 204508 / S288c) OX=559292 GN=RPS27A PE=1 SV=1	P35997 (+1)	RPS27A	9 kDa		unknown	11647000000	5761800000	10935000000	6236500000	13166000000	2428800000	14093000000	5575600000	11015000000	4684300000	11860000000	5286700000	16397000000	5232700000	6306200000	5153000000	13322000000	5357700000	1	1	1	1	1	0.97	1	1	1	1	1	1	1	1	1	1	1	1	58	3	47	6	43	2	29	3
Endoplasmic reticulum transmembrane helix translocase OS=Saccharomyces cerevisiae (strain ATCC 204508 / S288c) OX=559292 GN=SPF1 PE=1 SV=1	P39986	SPF1	135 kDa		unknown	4101900	0	5331400	0	5115900	0	17613000	0	26857000	0	25040000	0	8875100	0	12229000	0	9871600	0	1	0	1	0	1	0	1	0	1	0	1	0.85	1	0.07	1	0	1	0	24	0	29	0	21	0	46	0
Alanine--tRNA ligase, mitochondrial OS=Saccharomyces cerevisiae (strain ATCC 204508 / S288c) OX=559292 GN=ALA1 PE=1 SV=3	P40825	ALA1	110 kDa		unknown	26853000	0	8162200	0	4875000	0	61938000	0	13480000	0	17426000	0	44750000	0	41483000	0	36917000	0	1	0.06	1	0	1	0	1	0	1	0	1	0	1	0.82	1	0	1	0	39	0	37	0	23	0	38	0
ATP-dependent rRNA helicase RRP3 OS=Saccharomyces cerevisiae (strain ATCC 204508 / S288c) OX=559292 GN=RRP3 PE=1 SV=2	P38712	RRP3	56 kDa	TRUE	unknown	33552000	0	40607000	0	25764000	0	39986000	0	34314000	0	27882000	1952100	21530000	4748200	27840000	0	24090000	0	1	0.2	1	0.06	1	0	1	0.09	1	0	1	0.63	1	0.96	1	0	1	0	44	0	48	0	39	0	42	0
U3 small nucleolar RNA-associated protein 13 OS=Saccharomyces cerevisiae (strain ATCC 204508 / S288c) OX=559292 GN=UTP13 PE=1 SV=1	Q05946	UTP13	91 kDa		unknown	12863000	0	32706000	0	32118000	0	18587000	0	14494000	0	26782000	0	16729000	0	20985000	0	19576000	0	1	0	1	0	1	0	1	0.66	1	0	1	0	1	0	1	0	1	0	45	0	30	0	32	0	36	1
tRNA pseudouridine synthase 1 OS=Saccharomyces cerevisiae (strain ATCC 204508 / S288c) OX=559292 GN=PUS1 PE=1 SV=1	Q12211	PUS1	62 kDa		unknown	24661000	0	29049000	0	32511000	0	32712000	0	30859000	0	26950000	2004500	21021000	3394000	24330000	0	25531000	0	1	0.09	1	0	1	0.49	1	0	1	0	1	0.33	1	1	1	0	1	0	44	0	45	0	40	0	41	0
DNA replication licensing factor MCM4 OS=Saccharomyces cerevisiae (strain ATCC 204508 / S288c) OX=559292 GN=MCM4 PE=1 SV=2	P30665	MCM4	105 kDa	TRUE	unknown	5426500	0	5376700	0	7231400	0	8042300	0	12557000	0	10950000	0	10814000	2331900	15282000	0	7882700	0	1	0.05	1	0	1	0	1	0	1	0	1	0.07	1	1	1	0.63	1	0.37	37	0	27	0	31	0	31	0
Something about silencing protein 10 OS=Saccharomyces cerevisiae (strain ATCC 204508 / S288c) OX=559292 GN=SAS10 PE=1 SV=1	Q12136	SAS10	70 kDa		unknown	32727000	-1	34396000	0	23267000	-1	30913000	0	70383000	0	38798000	0	33535000	0	38719000	0	33012000	0	1	0	1	0	1	0	1	0	1	0	1	0.06	1	0	1	0.06	1	0	38	0	42	0	30	0	37	0
RuvB-like protein 2 OS=Saccharomyces cerevisiae (strain ATCC 204508 / S288c) OX=559292 GN=RVB2 PE=1 SV=1	Q12464	RVB2	52 kDa		unknown	25365000	0	35946000	0	36755000	0	37585000	0	46917000	-1	41572000	6993400	30011000	2683600	56323000	0	46919000	0	1	0	1	0	1	0	1	0.11	1	0	1	1	1	0.95	1	0	1	0	43	0	50	0	42	0	34	0
60S ribosomal protein L42-A OS=Saccharomyces cerevisiae (strain ATCC 204508 / S288c) OX=559292 GN=RPL42A PE=1 SV=1	P0CX27	RPL42A	12 kDa		unknown	110880000	-1	266740000	-1	939750000	-1	107050000	0	69374000	0	124030000	0	83691000	0	63194000	0	166410000	0	1	0	1	0	1	0	1	0	1	0	1	0	1	0.07	1	0.16	1	0.06	19	0	29	0	62	0	32	0
Metal resistance protein YCF1 OS=Saccharomyces cerevisiae (strain ATCC 204508 / S288c) OX=559292 GN=YCF1 PE=1 SV=2	P39109	YCF1	171 kDa	TRUE	unknown	6462300	0	9062600	0	6248500	0	8309900	0	13690000	0	12562000	0	5653600	0	8894600	0	6287400	0	1	0	1	0	1	0	1	0	1	0	1	0	1	0	1	0	1	0	42	0	46	0	33	0	36	0
Protein BCP1 OS=Saccharomyces cerevisiae (strain ATCC 204508 / S288c) OX=559292 GN=BCP1 PE=1 SV=1	Q06338	BCP1	33 kDa		unknown	73890000	0	75018000	0	85955000	0	47115000	-1	80059000	0	92608000	0	58909000	2188700	105450000	0	79590000	0	1	0	1	0	1	0	1	0	1	0	1	0.07	1	1	1	0	1	0	41	0	40	0	35	0	28	0
Nucleolar complex protein 2 OS=Saccharomyces cerevisiae (strain ATCC 204508 / S288c) OX=559292 GN=NOC2 PE=1 SV=2	P39744	NOC2	82 kDa		unknown	21531000	0	32795000	0	17510000	0	19307000	0	15343000	0	27415000	0	22233000	0	14423000	0	24226000	0	1	0.65	1	0.23	1	0.11	1	0.11	1	0	1	0	1	0	1	0	1	0	45	0	55	0	36	0	36	0
tRNA (guanine(37)-N1)-methyltransferase OS=Saccharomyces cerevisiae (strain ATCC 204508 / S288c) OX=559292 GN=TRM5 PE=1 SV=1	P38793	TRM5	57 kDa		unknown	14447000	0	17392000	0	28193000	0	25641000	0	28043000	0	27069000	0	24210000	0	39140000	0	29790000	0	1	0	1	0	1	0	1	0	1	0	1	0	1	0	1	0	1	0	36	0	44	0	43	0	34	0
Pre-rRNA-processing protein RIX1 OS=Saccharomyces cerevisiae (strain ATCC 204508 / S288c) OX=559292 GN=RIX1 PE=1 SV=2	P38883	RIX1	87 kDa		unknown	9285800	0	9417800	0	5411300	0	9906400	0	9431000	0	12338000	0	14516000	0	20466000	0	14300000	0	1	0	1	0	1	0	1	0	1	0	1	0	1	0	1	0	1	0	41	0	48	0	27	0	34	0
E3 ubiquitin-protein ligase listerin OS=Saccharomyces cerevisiae (strain ATCC 204508 / S288c) OX=559292 GN=RKR1 PE=1 SV=1	Q04781	RKR1	180 kDa		unknown	2408500	0	3571700	0	4354500	0	5452400	0	4058600	0	5795200	0	3621400	0	5146400	0	3637200	0	1	0	1	0	1	0	1	0	1	0	1	0	1	0	1	0	1	0.38	44	0	36	0	29	0	37	0
ATP-dependent RNA helicase HCA4 OS=Saccharomyces cerevisiae (strain ATCC 204508 / S288c) OX=559292 GN=HCA4 PE=1 SV=2	P20448	HCA4	87 kDa		unknown	18593000	0	19938000	0	8404800	0	13349000	0	14873000	0	20332000	0	21494000	0	14670000	0	14673000	0	1	0	1	0	1	0	1	0.13	1	0	1	0.06	1	0	1	0.06	1	0	51	0	46	0	24	0	30	0
Ribosome-associated complex subunit SSZ1 OS=Saccharomyces cerevisiae (strain ATCC 204508 / S288c) OX=559292 GN=SSZ1 PE=1 SV=2	P38788	SSZ1	58 kDa		unknown	23039000	0	25586000	0	21551000	0	24065000	0	25473000	0	24196000	1445000	42164000	2036600	24234000	0	32287000	-1	1	0	1	0	1	0.05	1	0.06	1	0	1	0.51	1	1	1	0	1	0	46	0	44	0	42	0	34	0
Protein SSD1 OS=Saccharomyces cerevisiae (strain ATCC 204508 / S288c) OX=559292 GN=SSD1 PE=1 SV=1	P24276	SSD1	140 kDa		unknown	150720000	0	147930000	0	150680000	0	182030000	10651000	242370000	0	121420000	226650000	178820000	127380000	214840000	0	116380000	0	1	0.57	1	0.5	1	0.1	1	0.97	1	0	1	0.99	1	1	1	0.31	1	0.25	39	0	34	0	35	0	40	1
Cytochrome b-c1 complex subunit 1, mitochondrial OS=Saccharomyces cerevisiae (strain ATCC 204508 / S288c) OX=559292 GN=COR1 PE=1 SV=1	P07256	COR1	50 kDa		unknown	15357000	0	14850000	0	35977000	0	413500000	0	50080000	317610000	25935000	0	31277000	0	33234000	0	23433000	31558000	1	0.06	1	0	1	0	1	0	1	0.4	1	0	1	0.11	1	0.88	1	0.99	29	0	26	0	40	0	78	0
Isocitrate dehydrogenase [NAD] subunit 1, mitochondrial OS=Saccharomyces cerevisiae (strain ATCC 204508 / S288c) OX=559292 GN=IDH1 PE=1 SV=2	P28834	IDH1	39 kDa		unknown	78694000	0	90408000	0	123160000	0	195690000	0	128940000	6963500	109670000	30496000	110610000	40242000	176720000	0	100040000	0	1	0	1	0	1	0	1	0.69	1	0.94	1	1	1	1	1	0.86	1	0	39	0	36	0	43	0	37	0
ATP-dependent RNA helicase eIF4A OS=Saccharomyces cerevisiae (strain ATCC 204508 / S288c) OX=559292 GN=TIF1 PE=1 SV=3	P10081	TIF1	45 kDa		unknown	35334000	726620000	40248000	0	51097000	0	48210000	0	59698000	-1	53901000	0	55890000	1309600	52739000	0	47903000	-1	1	0.9	1	0	1	0	1	0	1	0	1	0	1	0.62	1	0	1	0	32	2	36	0	36	0	37	0
ARF guanine-nucleotide exchange factor 2 OS=Saccharomyces cerevisiae (strain ATCC 204508 / S288c) OX=559292 GN=GEA2 PE=1 SV=1	P39993	GEA2	166 kDa	TRUE	unknown	1988600	0	2261000	0	5547600	0	6273400	0	4232000	2031000	5719900	68721000	3009600	0	6495700	0	4404500	0	1	0.26	1	0.41	1	0.09	1	0.18	1	0.83	1	0.53	1	0.72	1	0.12	1	0.08	27	0	29	0	39	0	41	0
DNA replication licensing factor MCM6 OS=Saccharomyces cerevisiae (strain ATCC 204508 / S288c) OX=559292 GN=MCM6 PE=1 SV=2	P53091	MCM6	113 kDa	TRUE	unknown	3756900	0	3594700	0	5486000	0	5474400	0	8569500	0	8741800	85687000	6812200	0	8333400	0	9932600	0	1	0.06	1	0	1	0	1	0	1	0	1	0.37	1	0.97	1	0.2	1	0.21	33	0	29	0	26	0	26	0
Mitochondrial GTP/GDP carrier protein 1 OS=Saccharomyces cerevisiae (strain ATCC 204508 / S288c) OX=559292 GN=GGC1 PE=1 SV=1	P38988	GGC1	33 kDa		unknown	49515000	0	43483000	22087000	104710000	60749000	103260000	0	57724000	-1	70775000	0	47945000	16764000	200060000	20664000	174520000	0	1	0	1	0.6	1	0.98	1	0	1	0	1	0	1	1	1	1	1	0	32	0	33	2	42	3	31	0
Glucose-6-phosphate isomerase OS=Saccharomyces cerevisiae (strain ATCC 204508 / S288c) OX=559292 GN=PGI1 PE=1 SV=3	P12709	PGI1	61 kDa		unknown	20040000	0	24815000	0	35909000	0	29077000	0	24182000	0	32122000	0	42243000	3614400	35684000	0	41012000	0	1	0	1	0	1	0	1	0	1	0	1	0	1	0.62	1	0	1	0	33	0	31	0	31	0	27	0
U3 small nucleolar RNA-associated protein MPP10 OS=Saccharomyces cerevisiae (strain ATCC 204508 / S288c) OX=559292 GN=MPP10 PE=1 SV=1	P47083	MPP10	67 kDa		unknown	20726000	0	15660000	0	12819000	0	19392000	0	21365000	0	25082000	117350000	20594000	0	17741000	26675000	24474000	0	1	0.14	1	0.1	1	0.13	1	0.1	1	0.09	1	1	1	0	1	0.93	1	0.14	52	0	42	0	29	0	35	0
Nascent polypeptide-associated complex subunit alpha OS=Saccharomyces cerevisiae (strain ATCC 204508 / S288c) OX=559292 GN=EGD2 PE=1 SV=3	P38879	EGD2	19 kDa		unknown	529320000	0	357020000	-1	313990000	0	407330000	0	201350000	0	259870000	0	423130000	-1	332480000	-1	315750000	0	1	0	1	0	1	0.32	1	0	1	0	1	0	1	0	1	0	1	0	46	0	43	0	37	0	34	0
Nucleoporin NUP133 OS=Saccharomyces cerevisiae (strain ATCC 204508 / S288c) OX=559292 GN=NUP133 PE=1 SV=1	P36161	NUP133	133 kDa		unknown	5375000	0	7301500	0	7980100	0	8553500	0	9231200	0	10402000	0	6355600	0	9156800	0	6978400	0	1	0.34	1	0	1	0	1	0	1	0	1	0	1	0	1	0	1	0	32	0	35	0	32	0	31	0
Serine palmitoyltransferase 2 OS=Saccharomyces cerevisiae (strain ATCC 204508 / S288c) OX=559292 GN=LCB2 PE=1 SV=1	P40970	LCB2	63 kDa		unknown	41379000	0	41464000	0	20255000	0	42770000	0	46115000	0	43732000	0	54182000	2858700	83575000	0	60284000	0	1	0	1	0	1	0	1	0	1	0	1	0	1	0.96	1	0	1	0	38	0	31	0	21	0	30	0
Nucleolar pre-ribosomal-associated protein 2 OS=Saccharomyces cerevisiae (strain ATCC 204508 / S288c) OX=559292 GN=URB2 PE=1 SV=1	P47108	URB2	135 kDa		unknown	3506600	0	4993900	0	1541200	0	5168400	0	3478500	0	9307700	0	5056900	0	3764600	0	2952300	0	1	0.08	1	0	1	0	1	0	1	0	1	0	1	0	1	0	1	0	40	0	42	0	21	0	40	0
Translation machinery-associated protein 46 OS=Saccharomyces cerevisiae (strain ATCC 204508 / S288c) OX=559292 GN=TMA46 PE=1 SV=2	Q12000	TMA46	40 kDa		unknown	66729000	0	81940000	0	58592000	-1	58588000	0	99092000	0	64414000	0	83262000	0	61708000	0	53390000	0	1	0	1	0	1	0	1	0	1	0	1	0	1	0	1	0	1	0.1	39	0	39	0	29	0	32	0
5-methyltetrahydropteroyltriglutamate--homocysteine methyltransferase OS=Saccharomyces cerevisiae (strain ATCC 204508 / S288c) OX=559292 GN=MET6 PE=1 SV=4	P05694	MET6	86 kDa		unknown	5220200	0	4488300	0	14881000	0	8917900	0	16232000	0	8789000	0	6831700	0	5249300	0	9966200	0	1	0.06	1	0	1	0	1	0.06	1	0	1	0	1	0	1	0	1	0.22	39	0	25	0	46	0	31	0
Lanosterol 14-alpha demethylase OS=Saccharomyces cerevisiae (strain ATCC 204508 / S288c) OX=559292 GN=ERG11 PE=1 SV=1	P10614	ERG11	61 kDa		unknown	21658000	0	21879000	0	18402000	0	42082000	0	43739000	0	43484000	0	47246000	0	42222000	0	28077000	0	1	0	1	0	1	0	1	0	1	0	1	0	1	0.41	1	0.25	1	0.06	30	0	23	0	26	0	28	0
60S acidic ribosomal protein P2-beta OS=Saccharomyces cerevisiae (strain ATCC 204508 / S288c) OX=559292 GN=RPP2B PE=1 SV=2	P02400	RPP2B	11 kDa	TRUE	unknown	536570000	0	570600000	0	945230000	0	1227900000	-1	144990000	-1	568890000	-1	805550000	375680000	1110200000	207830000	877400000	596100000	1	0.19	1	0	1	0	1	0	1	0	1	0	1	1	1	1	1	1	38	0	35	0	65	0	45	0
Ribosome assembly protein 1 OS=Saccharomyces cerevisiae (strain ATCC 204508 / S288c) OX=559292 GN=RIA1 PE=1 SV=1	P53893	RIA1	124 kDa		unknown	1468400	0	1534000	0	3005100	0	3111600	0	4725500	0	3838600	0	3877500	0	3901100	0	3427900	0	1	0	1	0	1	0	1	0	1	0	1	0	1	0	1	0	1	0	37	0	28	0	20	0	29	0
Asparagine--tRNA ligase, cytoplasmic OS=Saccharomyces cerevisiae (strain ATCC 204508 / S288c) OX=559292 GN=DED81 PE=1 SV=1	P38707	DED81	62 kDa		unknown	14305000	0	16625000	0	14843000	0	15136000	0	51298000	0	52379000	3997500	24480000	3596700	43733000	0	33678000	0	1	0	1	0	1	0	1	0	1	0	1	0.95	1	0.99	1	0	1	0	33	0	27	0	25	0	25	0
Tricalbin-2 OS=Saccharomyces cerevisiae (strain ATCC 204508 / S288c) OX=559292 GN=TCB2 PE=1 SV=1	P48231	TCB2	133 kDa	TRUE	unknown	7216500	0	5069300	0	4930700	0	4794400	0	6476500	0	6034100	0	4515100	1304200	9531700	0	8453200	0	1	0.06	1	0	1	0	1	0	1	0	1	0	1	0.69	1	0	1	0.07	40	0	27	0	25	0	25	0
U3 small nucleolar RNA-associated protein 15 OS=Saccharomyces cerevisiae (strain ATCC 204508 / S288c) OX=559292 GN=UTP15 PE=1 SV=1	Q04305	UTP15	58 kDa		unknown	30778000	-1	25391000	0	9504200	0	26433000	0	21146000	0	29391000	0	23489000	0	31378000	0	24595000	-1	1	0	1	0	1	0	1	0	1	0	1	0	1	0	1	0	1	0	51	0	41	0	22	0	30	0
Minichromosome maintenance protein 5 OS=Saccharomyces cerevisiae (strain ATCC 204508 / S288c) OX=559292 GN=MCM5 PE=1 SV=1	P29496	MCM5	86 kDa	TRUE	unknown	3522100	0	6939200	0	10449000	0	11654000	0	12534000	0	11646000	0	11295000	758690	8773400	0	7406800	0	1	0.09	1	0	1	0	1	0	1	0	1	0	1	0.97	1	0.07	1	0	23	0	28	0	38	0	29	0
Cluster of NADP-specific glutamate dehydrogenase 1 OS=Saccharomyces cerevisiae (strain ATCC 204508 / S288c) OX=559292 GN=GDH1 PE=1 SV=2 (P07262)	P07262 [2]	GDH1	50 kDa	TRUE	unknown	4375900	0	6111900	0	20515000	0	23000000	0	28751000	0	23279000	0	19538000	0	26026000	0	21659000	0	1	0	1	0.19	1	0	1	0	1	0	1	0	1	0.18	1	0	1	0	22	0	25	0	35	0	33	0
Homocitrate dehydratase, mitochondrial OS=Saccharomyces cerevisiae (strain ATCC 204508 / S288c) OX=559292 GN=ACO2 PE=1 SV=1	P39533	ACO2	87 kDa		unknown	10431000	0	8710600	0	21345000	0	26252000	0	31522000	0	74608000	0	7775500	0	12438000	0	17523000	0	1	0	1	0	1	0	1	0	1	0	1	0.2	1	0	1	0.11	1	0	25	0	27	0	30	0	34	0
26S proteasome regulatory subunit 8 homolog OS=Saccharomyces cerevisiae (strain ATCC 204508 / S288c) OX=559292 GN=RPT6 PE=1 SV=4	Q01939	RPT6	45 kDa		unknown	32425000	0	36817000	0	31800000	0	37066000	0	102790000	15735000	83899000	52943000	53705000	20793000	71309000	7572500	60839000	0	1	0.6	1	0	1	0.84	1	0.07	1	0.49	1	1	1	1	1	0.11	1	0.73	28	0	23	0	21	0	15	0
Adenine deaminase OS=Saccharomyces cerevisiae (strain ATCC 204508 / S288c) OX=559292 GN=AAH1 PE=1 SV=1	P53909	AAH1	40 kDa		unknown	49412000	0	48425000	0	60641000	0	47236000	0	62353000	0	55594000	0	40942000	0	70510000	0	62714000	0	1	0	1	0	1	0	1	0	1	0	1	0	1	0	1	0	1	0	37	0	39	0	29	0	25	0
3-keto-steroid reductase OS=Saccharomyces cerevisiae (strain ATCC 204508 / S288c) OX=559292 GN=ERG27 PE=1 SV=1	Q12452	ERG27	40 kDa		unknown	45958000	412860000	49788000	0	52715000	0	69827000	0	49576000	0	59199000	0	56364000	3242700	92522000	0	62438000	0	1	0.92	1	0	1	0	1	0	1	0	1	0	1	0.88	1	0	1	0	38	3	35	0	32	0	34	0
Pyruvate dehydrogenase complex protein X component, mitochondrial OS=Saccharomyces cerevisiae (strain ATCC 204508 / S288c) OX=559292 GN=PDX1 PE=1 SV=1	P16451	PDX1	45 kDa		unknown	25213000	0	24280000	0	30032000	0	26512000	0	24071000	0	30017000	0	31136000	0	9358000	0	25196000	0	1	0	1	0	1	0	1	0	1	0	1	0	1	0.27	1	0.19	1	0	38	0	34	0	38	0	32	0
Protein transport protein SEC13 OS=Saccharomyces cerevisiae (strain ATCC 204508 / S288c) OX=559292 GN=SEC13 PE=1 SV=1	Q04491	SEC13	33 kDa		unknown	45366000	0	48914000	0	52650000	0	66655000	0	97524000	-1	79464000	0	71451000	7889600	114010000	0	80182000	-1	1	0	1	0	1	0	1	0.08	1	0	1	0.09	1	1	1	0.22	1	0	33	0	36	0	35	0	32	0
Large subunit GTPase 1 OS=Saccharomyces cerevisiae (strain ATCC 204508 / S288c) OX=559292 GN=LSG1 PE=1 SV=1	P53145	LSG1	73 kDa		unknown	6389300	0	8838200	0	8621200	0	7480100	0	24695000	-1	12446000	0	17117000	0	19841000	0	9884900	0	1	0	1	0	1	0	1	0	1	0	1	0.24	1	0	1	0	1	0	26	0	30	0	27	0	27	0
Phosphatidylinositol 4-kinase STT4 OS=Saccharomyces cerevisiae (strain ATCC 204508 / S288c) OX=559292 GN=STT4 PE=1 SV=1	P37297	STT4	215 kDa		unknown	1403700	18223000	1147000	0	1254700	8057100	3497900	3334800	2779800	0	3187700	0	2277900	0	3200300	0	2995700	0	1	0.72	1	0.21	1	0.65	1	0.66	1	0	1	0.52	1	0	1	0	1	0	25	1	18	0	23	1	43	1
Isocitrate dehydrogenase [NAD] subunit 2, mitochondrial OS=Saccharomyces cerevisiae (strain ATCC 204508 / S288c) OX=559292 GN=IDH2 PE=1 SV=1	P28241	IDH2	40 kDa		unknown	75700000	0	94453000	0	147850000	26942000	172800000	0	114650000	5034600	88770000	22729000	95073000	99214000	143100000	12197000	98015000	0	1	0	1	0	1	1	1	0	1	0.33	1	1	1	1	1	1	1	0	35	0	33	0	31	2	33	0
Citrate/oxoglutarate carrier protein OS=Saccharomyces cerevisiae (strain ATCC 204508 / S288c) OX=559292 GN=YHM2 PE=1 SV=1	Q04013	YHM2	34 kDa		unknown	133360000	0	187670000	68225000	214910000	288300000	213270000	88686000	124180000	28862000	140390000	132420000	144840000	75374000	217260000	146200000	179410000	19321000	1	0.44	1	1	1	1	1	1	1	0.69	1	1	1	1	1	1	1	0.94	28	0	31	6	31	7	21	4
Histone H4 OS=Saccharomyces cerevisiae (strain ATCC 204508 / S288c) OX=559292 GN=HHF1 PE=1 SV=2	P02309	HHF1	11 kDa		unknown	1321000000	16374000000	2079600000	1055400000	1582300000	1476500000	1473900000	1268200000	767900000	300150000	849050000	260360000	797230000	386410000	828230000	267130000	706000000	417640000	1	1	1	1	1	1	1	1	1	1	1	1	1	1	1	1	1	1	36	11	35	8	32	9	26	7
GTPase-activating protein BEM2/IPL2 OS=Saccharomyces cerevisiae (strain ATCC 204508 / S288c) OX=559292 GN=BEM2 PE=1 SV=1	P39960	BEM2	245 kDa		unknown	1437300	0	1278900	0	494430	0	1073500	50389000	1723200	0	2057200	0	976030	0	1561400	0	1919000	0	1	0.32	1	0	1	0.14	1	0.68	1	0	1	0	1	0	1	0	1	0.08	35	0	34	0	12	0	21	1
Protein MSN5 OS=Saccharomyces cerevisiae (strain ATCC 204508 / S288c) OX=559292 GN=MSN5 PE=1 SV=1	P52918	MSN5	142 kDa		unknown	2293100	0	2459300	0	2616400	0	5205400	0	4489900	0	6003500	0	4199500	0	6518500	0	5159200	0	1	0	1	0	1	0	1	0	1	0.08	1	0	1	0	1	0	1	0	27	0	26	0	22	0	35	0
Periodic tryptophan protein 1 OS=Saccharomyces cerevisiae (strain ATCC 204508 / S288c) OX=559292 GN=PWP1 PE=1 SV=1	P21304	PWP1	64 kDa		unknown	16841000	0	19848000	0	19196000	0	30260000	0	27443000	0	25237000	0	24897000	0	15522000	0	21957000	0	1	0	1	0	1	0	1	0	1	0	1	0	1	0	1	0	1	0.1	38	0	38	0	23	0	32	0
DNA repair/transcription protein MET18/MMS19 OS=Saccharomyces cerevisiae (strain ATCC 204508 / S288c) OX=559292 GN=MET18 PE=1 SV=1	P40469	MET18	118 kDa		unknown	1785500	0	2647000	0	4085500	0	6780100	0	5086500	0	9505200	0	6207000	0	7790000	0	6056400	0	1	0.1	1	0	1	0	1	0	1	0	1	0	1	0	1	0	1	0	19	0	25	0	30	0	34	0
Ketol-acid reductoisomerase, mitochondrial OS=Saccharomyces cerevisiae (strain ATCC 204508 / S288c) OX=559292 GN=ILV5 PE=1 SV=1	P06168	ILV5	44 kDa		unknown	28293000	0	29427000	0	26613000	0	43355000	0	115460000	0	49466000	0	26104000	0	32601000	-1	37290000	0	1	0	1	0	1	0	1	0	1	0	1	0	1	0	1	0	1	0	30	0	34	0	18	0	31	0
Importin subunit beta-2 OS=Saccharomyces cerevisiae (strain ATCC 204508 / S288c) OX=559292 GN=KAP104 PE=1 SV=1	P38217	KAP104	104 kDa		unknown	11277000	0	11968000	0	12666000	0	20485000	0	25840000	270070000	16667000	2273900	19103000	4587500	24764000	0	25464000	0	1	0.46	1	0.42	1	0.95	1	0.56	1	0.41	1	0.96	1	1	1	0.4	1	0.36	25	0	21	1	17	0	23	0
Nucleoporin NUP188 OS=Saccharomyces cerevisiae (strain ATCC 204508 / S288c) OX=559292 GN=NUP188 PE=1 SV=1	P52593	NUP188	189 kDa		unknown	1487500	0	1806900	0	836070	0	2911800	0	4238800	0	4760800	0	2320700	0	3254100	0	3263800	0	1	0.05	1	0	1	0	1	0	1	0	1	0	1	0	1	0	1	0	21	0	20	0	16	0	26	0
Multifunctional tryptophan biosynthesis protein OS=Saccharomyces cerevisiae (strain ATCC 204508 / S288c) OX=559292 GN=TRP3 PE=1 SV=2	P00937	TRP3	53 kDa		unknown	21772000	0	24252000	0	29616000	-1	24921000	0	44525000	0	38123000	0	28678000	6760300	44362000	0	24365000	-1	1	0	1	0	1	0	1	0	1	0	1	0.93	1	1	1	0.2	1	0	34	0	28	0	30	0	21	0
DNA-directed RNA polymerase III subunit RPC2 OS=Saccharomyces cerevisiae (strain ATCC 204508 / S288c) OX=559292 GN=RET1 PE=1 SV=2	P22276	RET1	129 kDa		unknown	2227800	0	3489500	0	5109800	0	7398100	0	9788400	0	7053600	0	3787200	0	8509600	0	4871000	0	1	0	1	0	1	0	1	0	1	0	1	0	1	0	1	0	1	0.61	23	0	18	0	24	0	35	0
Mitochondrial oxaloacetate transport protein OS=Saccharomyces cerevisiae (strain ATCC 204508 / S288c) OX=559292 GN=OAC1 PE=1 SV=1	P32332	OAC1	35 kDa		unknown	90870000	0	106120000	48297000	236840000	251250000	194690000	19579000	248910000	35055000	176650000	44509000	78840000	49289000	236660000	60850000	144130000	43516000	1	0	1	0.9	1	1	1	0.95	1	1	1	1	1	1	1	1	1	1	34	0	25	3	28	5	29	2
tRNA (cytidine(32)-2'-O)-methyltransferase non-catalytic subunit TRM732 OS=Saccharomyces cerevisiae (strain ATCC 204508 / S288c) OX=559292 GN=TRM732 PE=1 SV=1	Q03496	TRM732	164 kDa		unknown	2084500	0	2033000	0	2409300	0	3426800	0	2531400	0	4515200	14122000	2793100	0	4705900	8511700	3266000	4432100	1	0.83	1	0	1	0.08	1	0	1	0	1	0.32	1	0	1	0.45	1	0.49	25	0	19	0	25	0	26	0
Ribosome biogenesis protein BRX1 OS=Saccharomyces cerevisiae (strain ATCC 204508 / S288c) OX=559292 GN=BRX1 PE=1 SV=2	Q08235	BRX1	34 kDa		unknown	84639000	0	110610000	0	77417000	0	69491000	0	132510000	0	86102000	0	103000000	0	75596000	-1	65536000	-1	1	0	1	0	1	0	1	0	1	0.07	1	0.06	1	0	1	0	1	0	38	0	36	0	24	0	17	0
Carbamoyl-phosphate synthase arginine-specific small chain OS=Saccharomyces cerevisiae (strain ATCC 204508 / S288c) OX=559292 GN=CPA1 PE=1 SV=1	P07258	CPA1	45 kDa		unknown	20089000	0	21337000	0	47314000	0	46485000	0	39923000	0	42331000	0	17942000	2020400	36548000	0	41675000	0	1	0	1	0	1	0	1	0	1	0.4	1	0	1	0.33	1	0.39	1	0	32	0	25	0	36	0	39	0
Exportin-T OS=Saccharomyces cerevisiae (strain ATCC 204508 / S288c) OX=559292 GN=LOS1 PE=1 SV=1	P33418	LOS1	127 kDa		unknown	4368800	0	5036900	0	6565300	20261000	8955100	0	7949300	0	11488000	0	6946600	0	13773000	-1	9585400	0	1	0	1	0	1	0.4	1	0.45	1	0	1	0	1	0	1	0	1	0	27	0	25	0	29	1	25	0
U3 small nucleolar RNA-associated protein 21 OS=Saccharomyces cerevisiae (strain ATCC 204508 / S288c) OX=559292 GN=UTP21 PE=1 SV=1	Q06078	UTP21	105 kDa		unknown	8026100	0	9664200	0	7809000	0	10367000	0	9301800	-1	13353000	0	13639000	0	15329000	0	8557100	0	1	0	1	0	1	0	1	0	1	0	1	0	1	0	1	0	1	0	32	0	37	0	28	0	26	0
ATP-dependent RNA helicase DBP9 OS=Saccharomyces cerevisiae (strain ATCC 204508 / S288c) OX=559292 GN=DBP9 PE=1 SV=1	Q06218	DBP9	68 kDa		unknown	16821000	0	16252000	0	5927800	0	6706400	0	11661000	0	18051000	0	18756000	0	10741000	0	11754000	0	1	0	1	0	1	0	1	0	1	0	1	0	1	0	1	0	1	0	42	0	35	0	24	0	24	0
Pumilio homology domain family member 6 OS=Saccharomyces cerevisiae (strain ATCC 204508 / S288c) OX=559292 GN=PUF6 PE=1 SV=1	Q04373	PUF6	75 kDa		unknown	14363000	0	16993000	0	13715000	0	17769000	0	23698000	0	29265000	0	17700000	0	18659000	0	23378000	0	1	0.06	1	0	1	0	1	0	1	0	1	0	1	0	1	0	1	0	31	0	29	0	25	0	31	0
Anthranilate synthase component 1 OS=Saccharomyces cerevisiae (strain ATCC 204508 / S288c) OX=559292 GN=TRP2 PE=1 SV=4	P00899	TRP2	57 kDa		unknown	27777000	0	38621000	0	53541000	0	37885000	0	42760000	5665600	32788000	2510200	25265000	13597000	34957000	0	28867000	0	1	0	1	0	1	0	1	0.61	1	0.98	1	0.97	1	1	1	0	1	0	42	0	34	0	35	0	26	0
Hydroxymethylglutaryl-CoA synthase OS=Saccharomyces cerevisiae (strain ATCC 204508 / S288c) OX=559292 GN=ERG13 PE=1 SV=1	P54839	ERG13	55 kDa		unknown	43142000	0	45237000	0	41997000	0	46997000	0	67074000	0	45984000	26903000	33684000	25936000	68158000	18482000	66081000	0	1	0	1	0	1	0	1	0	1	0.63	1	1	1	1	1	0.99	1	0	40	0	32	0	32	0	28	0
5'-3' exoribonuclease 1 OS=Saccharomyces cerevisiae (strain ATCC 204508 / S288c) OX=559292 GN=XRN1 PE=1 SV=1	P22147	XRN1	175 kDa		unknown	2199600	0	2663900	0	4325600	0	3503200	0	4788200	0	4654400	0	4412800	0	5085800	0	4125500	0	1	0	1	0	1	0	1	0.34	1	0	1	0	1	0	1	0	1	0	21	0	21	0	26	0	20	0
Protein KRI1 OS=Saccharomyces cerevisiae (strain ATCC 204508 / S288c) OX=559292 GN=KRI1 PE=1 SV=1	P42846	KRI1	69 kDa		unknown	24705000	0	29090000	0	11379000	0	20983000	0	15104000	0	21918000	0	21160000	0	14712000	0	14026000	0	1	0	1	0	1	0	1	0	1	0	1	0	1	0	1	0	1	0	43	0	39	0	25	0	33	0
Lysine--tRNA ligase, cytoplasmic OS=Saccharomyces cerevisiae (strain ATCC 204508 / S288c) OX=559292 GN=KRS1 PE=1 SV=2	P15180	KRS1	68 kDa		unknown	11938000	0	8626600	0	13325000	-1	16150000	0	55384000	0	30637000	0	15028000	0	18646000	0	17274000	0	1	0	1	0	1	0	1	0.33	1	0	1	0	1	0	1	0.12	1	0.4	29	0	21	0	22	0	23	0
Protein MON2 OS=Saccharomyces cerevisiae (strain ATCC 204508 / S288c) OX=559292 GN=MON2 PE=1 SV=1	P48563	MON2	187 kDa		unknown	539180	0	615840	0	1982900	0	3631600	0	2780800	0	3286000	0	2663900	0	3875300	0	3527400	0	1	0	1	0	1	0.2	1	0	1	0	1	0	1	0	1	0.1	1	0	16	0	12	0	30	0	39	0
Nucleolar protein 9 OS=Saccharomyces cerevisiae (strain ATCC 204508 / S288c) OX=559292 GN=NOP9 PE=1 SV=1	P47077	NOP9	78 kDa		unknown	10840000	0	9922100	0	5724200	0	7828000	0	12533000	0	16978000	2092700	14051000	0	16683000	0	11899000	0	1	0.42	1	0	1	0.13	1	0.2	1	0	1	0.99	1	0.96	1	0	1	0	43	0	37	0	14	0	20	0
Polyamine N-acetyltransferase 1 OS=Saccharomyces cerevisiae (strain ATCC 204508 / S288c) OX=559292 GN=PAA1 PE=1 SV=1	Q12447	PAA1	22 kDa		unknown	79535000	0	115480000	-1	63943000	0	70937000	0	99091000	0	62919000	0	88820000	2061800	142040000	0	71666000	-1	1	0	1	0	1	0	1	0	1	0	1	0	1	0.95	1	0	1	0	31	0	36	0	29	0	20	0
Squalene monooxygenase OS=Saccharomyces cerevisiae (strain ATCC 204508 / S288c) OX=559292 GN=ERG1 PE=1 SV=2	P32476	ERG1	55 kDa		unknown	18015000	0	19589000	-1	16301000	-1	17368000	0	20843000	0	36411000	984580	28230000	4229500	71876000	3600600	36492000	0	1	0	1	0	1	0	1	0	1	0	1	0.69	1	0.84	1	0.97	1	0	32	0	29	0	16	0	24	0
Pre-rRNA-processing protein IPI3 OS=Saccharomyces cerevisiae (strain ATCC 204508 / S288c) OX=559292 GN=IPI3 PE=1 SV=1	P53877	IPI3	62 kDa		unknown	12630000	0	16872000	0	12001000	0	9459500	0	12916000	-1	15596000	0	22535000	0	17855000	0	14827000	0	1	0	1	0	1	0	1	0	1	0	1	0	1	0	1	0	1	0	30	0	39	0	24	0	21	0
Sterol-4-alpha-carboxylate 3-dehydrogenase, decarboxylating OS=Saccharomyces cerevisiae (strain ATCC 204508 / S288c) OX=559292 GN=ERG26 PE=1 SV=1	P53199	ERG26	39 kDa		unknown	39689000	0	51526000	0	26594000	0	33813000	0	40110000	0	50228000	29995000	38918000	5256900	62436000	0	58035000	0	1	0	1	0.59	1	0	1	0	1	0	1	0.99	1	1	1	0	1	0	31	0	33	1	20	0	24	0
25S rRNA (adenine(645)-N(1))-methyltransferase OS=Saccharomyces cerevisiae (strain ATCC 204508 / S288c) OX=559292 GN=RRP8 PE=1 SV=2	P38961	RRP8	46 kDa		unknown	27305000	0	29229000	0	15977000	0	22707000	0	18996000	0	32429000	0	35554000	0	50333000	0	25110000	0	1	0	1	0	1	0	1	0	1	0	1	0.06	1	0	1	0	1	0	31	0	33	0	23	0	29	0
Cluster of Ribonucleoside-diphosphate reductase large chain 1 OS=Saccharomyces cerevisiae (strain ATCC 204508 / S288c) OX=559292 GN=RNR1 PE=1 SV=2 (P21524)	P21524 [2]	RNR1	100 kDa	TRUE	unknown	5169600	-1	6702100	0	4956500	0	9404800	0	16684000	0	19424000	0	12591000	2412100	19850000	0	12491000	0	1	0	1	0.24	1	0.07	1	0.06	1	0.24	1	0.09	1	1	1	0.45	1	0	16	0	26	0	12	0	17	0
Ribose-phosphate pyrophosphokinase 1 OS=Saccharomyces cerevisiae (strain ATCC 204508 / S288c) OX=559292 GN=PRS1 PE=1 SV=1	P32895	PRS1	47 kDa		unknown	24394000	0	27195000	-1	24185000	0	27241000	-1	69783000	0	75010000	0	31086000	3131100	38859000	0	47676000	0	1	0	1	0	1	0	1	0	1	0	1	0	1	0.35	1	0	1	0	34	0	25	0	26	0	20	0
Translation initiation factor RLI1 OS=Saccharomyces cerevisiae (strain ATCC 204508 / S288c) OX=559292 GN=RLI1 PE=1 SV=1	Q03195	RLI1	68 kDa		unknown	10929000	0	14869000	0	13126000	-1	15943000	0	16512000	0	18890000	0	19137000	0	22784000	0	17851000	0	1	0	1	0.05	1	0	1	0	1	0	1	0	1	0	1	0	1	0	30	0	38	0	26	0	27	0
Leucine--tRNA ligase, cytoplasmic OS=Saccharomyces cerevisiae (strain ATCC 204508 / S288c) OX=559292 GN=CDC60 PE=1 SV=1	P26637	CDC60	124 kDa		unknown	2035300	0	1568300	0	2465100	0	3345300	0	7298300	0	3269300	0	2882600	0	5730800	0	4264300	0	1	0.45	1	0.05	1	0	1	0	1	0	1	0	1	0	1	0	1	0	25	0	14	0	21	0	27	0
Plasma membrane-associated coenzyme Q6 reductase PGA3 OS=Saccharomyces cerevisiae (strain ATCC 204508 / S288c) OX=559292 GN=PGA3 PE=1 SV=1	Q12746	PGA3	35 kDa		unknown	50613000	0	60012000	0	78261000	0	83372000	0	101770000	6588900	72842000	9924600	73409000	58416000	79747000	0	49758000	-1	1	0	1	0.4	1	0.27	1	0.06	1	0.54	1	1	1	1	1	0	1	0	35	0	28	0	26	0	26	0
Ribosome production factor 1 OS=Saccharomyces cerevisiae (strain ATCC 204508 / S288c) OX=559292 GN=RPF1 PE=1 SV=1	P38805	RPF1	35 kDa		unknown	51573000	43711000	54321000	0	35781000	-1	44019000	-1	50922000	0	43933000	0	58729000	0	60523000	0	53505000	0	1	0.71	1	0.24	1	0	1	0	1	0	1	0	1	0.27	1	0.37	1	0	41	1	31	0	26	0	21	0
Arginine--tRNA ligase, cytoplasmic OS=Saccharomyces cerevisiae (strain ATCC 204508 / S288c) OX=559292 GN=YDR341C PE=1 SV=1	Q05506	YDR341C	70 kDa	TRUE	unknown	4202400	0	6734800	0	4197300	0	5174100	0	33101000	0	10114000	0	3254800	0	6574300	0	5327300	0	1	0.57	1	0	1	0	1	0.18	1	0.93	1	0	1	0.09	1	0	1	0.08	25	0	32	0	14	0	20	0
37S ribosomal protein S23, mitochondrial OS=Saccharomyces cerevisiae (strain ATCC 204508 / S288c) OX=559292 GN=RSM23 PE=1 SV=3	Q01163	RSM23	51 kDa		unknown	8372400	0	7468000	0	9687100	0	12600000	0	26491000	0	15870000	0	18684000	1233100	14811000	0	11721000	0	1	0.18	1	0	1	0	1	0.17	1	0	1	0.14	1	1	1	0.09	1	0	23	0	20	0	21	0	25	0
DNA replication licensing factor MCM2 OS=Saccharomyces cerevisiae (strain ATCC 204508 / S288c) OX=559292 GN=MCM2 PE=1 SV=2	P29469	MCM2	99 kDa	TRUE	unknown	2916800	0	3990300	0	4072400	0	7052700	0	6592300	30712000	6435600	0	5233900	0	8438900	0	5620500	0	1	0.61	1	0	1	0	1	0	1	0.77	1	0	1	0	1	0	1	0	22	0	25	0	23	0	33	0
Aspartate aminotransferase, mitochondrial OS=Saccharomyces cerevisiae (strain ATCC 204508 / S288c) OX=559292 GN=AAT1 PE=1 SV=2	Q01802	AAT1	52 kDa		unknown	6366300	0	8607700	0	3759600	0	10332000	-1	10174000	0	18782000	0	15241000	0	27098000	0	18670000	0	1	0	1	0	1	0	1	0	1	0	1	0	1	0.64	1	0	1	0	20	0	19	0	12	0	23	0
U3 small nucleolar RNA-associated protein 4 OS=Saccharomyces cerevisiae (strain ATCC 204508 / S288c) OX=559292 GN=UTP4 PE=1 SV=1	Q06679	UTP4	88 kDa		unknown	7755000	0	5506900	0	3751300	0	8592000	0	9644800	0	16221000	0	13698000	0	9390300	0	9981100	0	1	0.11	1	0	1	0	1	0.08	1	0	1	0	1	0	1	0	1	0	40	0	24	0	9	0	27	0
Protein MSS51, mitochondrial OS=Saccharomyces cerevisiae (strain ATCC 204508 / S288c) OX=559292 GN=MSS51 PE=1 SV=2	P32335	MSS51	51 kDa		unknown	15191000	0	18121000	0	23588000	0	34683000	0	27930000	0	6105800	0	14952000	1416700	8562900	0	5037500	0	1	0	1	0	1	0	1	0	1	0	1	0	1	0.37	1	0	1	0	34	0	30	0	30	0	37	0
Protein SNQ2 OS=Saccharomyces cerevisiae (strain ATCC 204508 / S288c) OX=559292 GN=SNQ2 PE=1 SV=2	P32568	SNQ2	169 kDa	TRUE	unknown	1431700	0	1381500	0	2508500	0	4655800	0	4852900	0	8080400	0	5448800	0	7378500	0	7662900	0	1	0.05	1	0	1	0	1	0	1	0	1	0	1	0	1	0	1	0	15	0	13	0	22	0	28	0
26S proteasome regulatory subunit RPN7 OS=Saccharomyces cerevisiae (strain ATCC 204508 / S288c) OX=559292 GN=RPN7 PE=1 SV=3	Q06103	RPN7	49 kDa		unknown	6790400	0	7928400	0	11489000	0	54362000	0	56474000	0	44068000	0	18685000	0	33851000	0	19339000	0	1	0.59	1	0	1	0.16	1	0.32	1	0	1	0.82	1	0	1	0.79	1	0	19	0	16	0	19	0	26	0
UPF0674 endoplasmic reticulum membrane protein YNR021W OS=Saccharomyces cerevisiae (strain ATCC 204508 / S288c) OX=559292 GN=YNR021W PE=1 SV=3	P53723	YNR021W	47 kDa		unknown	59546000	0	70462000	0	46791000	0	49438000	0	56668000	0	66950000	0	59122000	3128000	90393000	0	62597000	0	1	0	1	0.89	1	0.9	1	0	1	0	1	0.95	1	0.95	1	0.13	1	0	32	0	32	1	24	1	18	0
Ribosomal RNA-processing protein 9 OS=Saccharomyces cerevisiae (strain ATCC 204508 / S288c) OX=559292 GN=RRP9 PE=1 SV=1	Q06506	RRP9	65 kDa		unknown	11229000	546310000	12150000	256920000	6747600	227430000	10132000	1329200000	13774000	586190000	14477000	407970000	16302000	112570000	15437000	181090000	14603000	396060000	1	0.75	1	0.5	1	0.88	1	0.66	1	0.53	1	0.99	1	0.33	1	0.44	1	0.58	25	3	23	4	16	4	21	4
Serine hydroxymethyltransferase, mitochondrial OS=Saccharomyces cerevisiae (strain ATCC 204508 / S288c) OX=559292 GN=SHM1 PE=1 SV=2	P37292	SHM1	54 kDa	TRUE	unknown	21215000	0	25882000	0	16981000	0	17181000	0	30426000	0	20496000	0	20130000	0	18551000	0	30616000	0	1	0.16	1	0	1	0	1	0.24	1	0	1	0	1	0	1	0	1	0	33	0	33	0	24	0	25	0
Translation initiation factor eIF-2B subunit delta OS=Saccharomyces cerevisiae (strain ATCC 204508 / S288c) OX=559292 GN=GCD2 PE=1 SV=1	P12754	GCD2	71 kDa		unknown	21500000	0	26054000	0	29681000	0	31886000	0	26322000	0	32453000	3760400	29760000	9893300	28886000	0	33292000	0	1	0.16	1	0	1	0	1	0	1	0	1	1	1	1	1	0	1	0	29	0	27	0	22	0	23	0
Aspartate-semialdehyde dehydrogenase OS=Saccharomyces cerevisiae (strain ATCC 204508 / S288c) OX=559292 GN=HOM2 PE=1 SV=1	P13663	HOM2	40 kDa		unknown	23972000	0	27532000	0	25844000	-1	30438000	0	54131000	-1	44358000	0	31851000	0	81092000	0	56696000	-1	1	0	1	0	1	0	1	0	1	0	1	0	1	0.13	1	0	1	0	25	0	25	0	29	0	28	0
Translation initiation factor eIF-2B subunit beta OS=Saccharomyces cerevisiae (strain ATCC 204508 / S288c) OX=559292 GN=GCD7 PE=1 SV=1	P32502	GCD7	43 kDa		unknown	47961000	0	38344000	0	54093000	-1	57674000	0	51546000	0	46333000	0	50455000	2239500	43511000	0	41772000	0	1	0	1	0	1	0	1	0	1	0	1	0	1	0.86	1	0	1	0	34	0	30	0	32	0	22	0
Ribosome biogenesis protein RLP7 OS=Saccharomyces cerevisiae (strain ATCC 204508 / S288c) OX=559292 GN=RLP7 PE=1 SV=1	P40693	RLP7	37 kDa		unknown	170340000	0	186430000	0	124520000	0	147840000	0	143500000	0	142590000	0	115910000	41389000	96172000	0	137770000	0	1	0	1	0	1	0	1	0	1	0	1	0.08	1	1	1	0	1	0	39	0	36	0	27	0	27	0
U3 small nucleolar RNA-associated protein 6 OS=Saccharomyces cerevisiae (strain ATCC 204508 / S288c) OX=559292 GN=UTP6 PE=1 SV=2	Q02354	UTP6	52 kDa		unknown	3961200	0	4313400	0	5539200	0	7209000	0	8297100	0	12497000	131880000	11671000	49856000	18375000	0	8313700	98112000	1	0	1	0.09	1	0	1	0	1	0.14	1	0.4	1	0.95	1	0.1	1	0.98	20	0	19	0	21	0	25	0
U3 small nucleolar RNA-associated protein 12 OS=Saccharomyces cerevisiae (strain ATCC 204508 / S288c) OX=559292 GN=DIP2 PE=1 SV=1	Q12220	DIP2	106 kDa		unknown	5798000	0	6245400	0	3728600	0	5583800	0	7159800	0	8955500	0	8597200	571310	9000100	0	6356200	0	1	0.23	1	0	1	0	1	0	1	0	1	0	1	0.49	1	0.19	1	0	31	0	26	0	20	0	23	0
General negative regulator of transcription subunit 3 OS=Saccharomyces cerevisiae (strain ATCC 204508 / S288c) OX=559292 GN=NOT3 PE=1 SV=2	P06102	NOT3	94 kDa	TRUE	unknown	6285100	0	4099600	0	6839500	0	4233800	0	5004700	0	8556000	0	7118300	0	10692000	0	8208700	0	1	0.54	1	0.06	1	0	1	0.06	1	0.32	1	0.06	1	0.21	1	0	1	0.15	26	0	19	0	24	0	23	0
DNA replication licensing factor MCM3 OS=Saccharomyces cerevisiae (strain ATCC 204508 / S288c) OX=559292 GN=MCM3 PE=1 SV=1	P24279	MCM3	108 kDa		unknown	2831000	0	3227000	0	6191900	0	2782100	0	4737300	0	6061400	0	2887400	0	23093000	0	4167400	0	1	0.48	1	0	1	0	1	0	1	0	1	0	1	0	1	0	1	0.22	29	0	21	0	29	0	13	0
Cluster of Protein BMH1 OS=Saccharomyces cerevisiae (strain ATCC 204508 / S288c) OX=559292 GN=BMH1 PE=1 SV=4 (P29311)	P29311 [2]	BMH1	30 kDa	TRUE	unknown	41449000	0	49831000	0	57777000	0	32438000	0	45876000	0	42929000	0	47676000	0	65018000	0	27752000	0	1	1	1	0	1	0	1	0	1	0.85	1	0.16	1	0.84	1	0.89	1	1	20	8	23	0	22	0	30	0
Cytochrome P450 61 OS=Saccharomyces cerevisiae (strain ATCC 204508 / S288c) OX=559292 GN=ERG5 PE=1 SV=1	P54781	ERG5	61 kDa		unknown	5861100	0	4918700	0	9222400	0	8967000	0	13472000	0	16269000	0	12935000	0	12152000	0	11226000	0	1	0.27	1	0	1	0.73	1	0	1	0	1	0	1	0	1	0	1	0	26	0	21	0	17	0	24	0
Eukaryotic translation initiation factor 3 subunit G OS=Saccharomyces cerevisiae (strain ATCC 204508 / S288c) OX=559292 GN=TIF35 PE=1 SV=1	Q04067	TIF35	31 kDa		unknown	41045000	0	52828000	0	35584000	0	49019000	0	67013000	0	68150000	6923000	20280000	2000000	42469000	0	33006000	0	1	0	1	0	1	0	1	0	1	0	1	0.96	1	0.99	1	0	1	0	29	0	37	0	21	0	20	0
Cytoplasmic export protein 1 OS=Saccharomyces cerevisiae (strain ATCC 204508 / S288c) OX=559292 GN=CEX1 PE=1 SV=1	Q12453	CEX1	85 kDa		unknown	6233700	0	7060900	0	8747500	0	8309300	0	7445700	0	13682000	0	8072600	0	11293000	0	8184300	0	1	0	1	0	1	0	1	0	1	0	1	0	1	0	1	0.06	1	0	24	0	23	0	27	0	21	0
Ribosome biogenesis protein NSA1 OS=Saccharomyces cerevisiae (strain ATCC 204508 / S288c) OX=559292 GN=NSA1 PE=1 SV=1	P53136	NSA1	52 kDa		unknown	8703800	0	11190000	0	11851000	0	11112000	0	20646000	0	16827000	0	21035000	0	16902000	0	13108000	0	1	0	1	0	1	0.1	1	0	1	0	1	0	1	0	1	0	1	0.16	27	0	27	0	18	0	19	0
Essential for maintenance of the cell wall protein 1 OS=Saccharomyces cerevisiae (strain ATCC 204508 / S288c) OX=559292 GN=EMW1 PE=1 SV=1	P42842	EMW1	102 kDa		unknown	4157300	0	5401600	0	2374400	0	3694000	0	4722100	0	8074000	0	4311900	0	9495300	0	4728300	0	1	0.13	1	0	1	0	1	0	1	0	1	0	1	0	1	0	1	0.15	31	0	33	0	18	0	23	0
FK506-binding protein 4 OS=Saccharomyces cerevisiae (strain ATCC 204508 / S288c) OX=559292 GN=FPR4 PE=1 SV=1	Q06205	FPR4	44 kDa	TRUE	unknown	147340000	0	138010000	0	44971000	0	73744000	-1	46775000	-1	93921000	0	71162000	8205300	74312000	0	69153000	0	1	0	1	0	1	0	1	0	1	0	1	0	1	0.95	1	0.28	1	0	43	0	46	0	25	0	29	0
Squalene synthase OS=Saccharomyces cerevisiae (strain ATCC 204508 / S288c) OX=559292 GN=ERG9 PE=1 SV=2	P29704	ERG9	52 kDa		unknown	16930000	0	22010000	0	24392000	0	14375000	0	29422000	0	35338000	-1	33480000	0	43432000	0	27527000	0	1	0	1	0	1	0	1	0	1	0	1	0	1	0	1	0.18	1	0	23	0	26	0	27	0	21	0
Suppressor of glycerol defect protein 1 OS=Saccharomyces cerevisiae (strain ATCC 204508 / S288c) OX=559292 GN=SGD1 PE=1 SV=1	Q06132	SGD1	103 kDa		unknown	3957200	0	3677700	0	1700900	0	3761400	0	5998400	0	9757100	0	7009200	0	13458000	0	4474700	0	1	0.22	1	0	1	0.4	1	0.84	1	0.14	1	0.17	1	0.11	1	0.89	1	0.09	26	0	24	0	12	0	24	0
54S ribosomal protein L3, mitochondrial OS=Saccharomyces cerevisiae (strain ATCC 204508 / S288c) OX=559292 GN=MRPL3 PE=1 SV=2	P36516	MRPL3	44 kDa		unknown	9648500	0	10028000	-1	14931000	0	17716000	0	25335000	-1	16713000	0	18737000	0	15564000	0	10717000	0	1	0	1	0	1	0	1	0	1	0	1	0	1	0.16	1	0	1	0.08	20	0	19	0	25	0	26	0
60S acidic ribosomal protein P1-beta OS=Saccharomyces cerevisiae (strain ATCC 204508 / S288c) OX=559292 GN=RPP1B PE=1 SV=3	P10622	RPP1B	11 kDa	TRUE	unknown	1740700000	-1	1394100000	-1	1612700000	-1	2193100000	-1	848270000	-1	946480000	-1	2063300000	267340000	2522800000	-1	1213700000	363140000	1	0	1	0	1	0	1	0	1	0	1	0	1	0.95	1	0	1	0.98	11	0	15	0	42	0	33	0
Nucleolar complex-associated protein 3 OS=Saccharomyces cerevisiae (strain ATCC 204508 / S288c) OX=559292 GN=NOC3 PE=1 SV=1	Q07896	NOC3	76 kDa		unknown	9579900	0	10940000	0	6471300	0	10938000	0	13022000	0	16434000	0	14318000	0	9319400	0	10857000	0	1	0	1	0	1	0	1	0	1	0	1	0	1	0	1	0	1	0	31	0	30	0	22	0	25	0
NADH-cytochrome b5 reductase 1 OS=Saccharomyces cerevisiae (strain ATCC 204508 / S288c) OX=559292 GN=CBR1 PE=1 SV=2	P38626	CBR1	31 kDa		unknown	17186000	0	26595000	-1	16009000	0	27381000	0	35831000	0	27292000	0	24129000	2792800	25695000	0	24919000	0	1	0.1	1	0	1	0	1	0	1	0	1	0	1	1	1	0	1	0	25	0	29	0	17	0	21	0
Nucleolar protein 13 OS=Saccharomyces cerevisiae (strain ATCC 204508 / S288c) OX=559292 GN=NOP13 PE=1 SV=2	P53883	NOP13	46 kDa		unknown	11305000	0	19218000	0	9272900	0	8005400	0	18396000	0	3146600	0	9560800	0	4458800	0	5863100	0	1	0	1	0	1	0.05	1	0	1	0	1	0	1	0	1	0	1	0	29	0	42	0	29	0	25	0
Dolichol-phosphate mannosyltransferase OS=Saccharomyces cerevisiae (strain ATCC 204508 / S288c) OX=559292 GN=DPM1 PE=1 SV=3	P14020	DPM1	30 kDa		unknown	46160000	0	36599000	0	49932000	0	64418000	0	66769000	0	62810000	0	57132000	6800600	59367000	0	67184000	0	1	0	1	0.12	1	0.07	1	0	1	0	1	0.28	1	0.98	1	0.06	1	0	29	0	23	0	25	0	21	0
Nucleoporin NUP120 OS=Saccharomyces cerevisiae (strain ATCC 204508 / S288c) OX=559292 GN=NUP120 PE=1 SV=1	P35729	NUP120	120 kDa		unknown	2325800	0	2173300	0	2348800	0	2535000	0	8305900	0	10896000	0	3408700	0	9010200	-1	4796700	-1	1	0	1	0	1	0	1	0.06	1	0	1	0	1	0	1	0	1	0	13	0	14	0	12	0	17	0
Synchronized import protein 1 OS=Saccharomyces cerevisiae (strain ATCC 204508 / S288c) OX=559292 GN=SYO1 PE=1 SV=1	Q07395	SYO1	70 kDa		unknown	19400000	-1	22834000	0	25038000	0	27813000	0	19294000	-1	22778000	0	28396000	3760000	31241000	0	29236000	0	1	0	1	0	1	0	1	0	1	0	1	0	1	1	1	0	1	0	31	0	30	0	24	0	22	0
Importin beta-like protein KAP122 OS=Saccharomyces cerevisiae (strain ATCC 204508 / S288c) OX=559292 GN=KAP122 PE=1 SV=1	P32767	KAP122	124 kDa		unknown	1987000	0	1736400	0	3076900	0	6583500	0	7774600	0	11127000	0	8105000	0	12226000	0	10305000	0	1	0.06	1	0	1	0	1	0	1	0	1	0	1	0	1	0	1	0	20	0	16	0	12	0	18	0
Increased sodium tolerance protein 2 OS=Saccharomyces cerevisiae (strain ATCC 204508 / S288c) OX=559292 GN=IST2 PE=1 SV=2	P38250	IST2	106 kDa		unknown	9624000	0	10847000	0	11970000	0	17330000	0	12265000	-1	13230000	0	9114500	0	5038800	0	11892000	0	1	0.13	1	0	1	0	1	0	1	0	1	0	1	0	1	0	1	0	34	0	37	0	29	0	29	0
Protein HGH1 OS=Saccharomyces cerevisiae (strain ATCC 204508 / S288c) OX=559292 GN=HGH1 PE=1 SV=2	P48362	HGH1	45 kDa		unknown	17922000	0	20299000	0	15406000	0	13894000	0	13647000	0	21490000	0	18186000	0	21434000	0	21876000	-1	1	0	1	0	1	0	1	0.11	1	0.06	1	0	1	0.89	1	0	1	0	32	0	29	0	22	0	20	0
Uncharacterized protein YOL098C OS=Saccharomyces cerevisiae (strain ATCC 204508 / S288c) OX=559292 GN=YOL098C PE=1 SV=1	Q12496	YOL098C	118 kDa		unknown	690800	0	1599000	0	2915900	0	4689200	0	10646000	0	11413000	0	6317000	0	10967000	0	6005500	0	1	0.08	1	0	1	0	1	0	1	0	1	0	1	0.16	1	0	1	0	10	0	12	0	19	0	22	0
Lon protease homolog, mitochondrial OS=Saccharomyces cerevisiae (strain ATCC 204508 / S288c) OX=559292 GN=PIM1 PE=1 SV=2	P36775	PIM1	127 kDa		unknown	1633100	0	1127500	0	2725800	0	2374600	0	4975000	0	2883700	0	2397200	0	6388100	0	1609800	0	1	0.23	1	0.29	1	0	1	0.67	1	0.14	1	0.07	1	0	1	0	1	0	25	0	17	0	20	0	17	0
S-adenosyl-L-methionine-dependent tRNA 4-demethylwyosine synthase OS=Saccharomyces cerevisiae (strain ATCC 204508 / S288c) OX=559292 GN=TYW1 PE=1 SV=1	Q08960	TYW1	90 kDa		unknown	8369400	0	8342900	0	8368600	0	9721200	0	8529700	0	11048000	0	5589700	0	9330100	0	7850600	0	1	0.34	1	0	1	0	1	0	1	0	1	0	1	0.05	1	0	1	0.32	26	0	23	0	23	0	25	0
Eukaryotic translation initiation factor 6 OS=Saccharomyces cerevisiae (strain ATCC 204508 / S288c) OX=559292 GN=TIF6 PE=1 SV=1	Q12522	TIF6	26 kDa		unknown	445210000	0	384010000	136240000	482330000	447590000	583570000	308200000	625950000	67778000	593930000	205350000	624800000	100910000	837760000	0	566860000	-1	1	0.41	1	0.97	1	1	1	0.99	1	0.98	1	1	1	1	1	0.36	1	0	31	0	27	2	21	3	15	3
Ribosomal RNA-processing protein 1 OS=Saccharomyces cerevisiae (strain ATCC 204508 / S288c) OX=559292 GN=RRP1 PE=1 SV=2	P35178	RRP1	33 kDa	TRUE	unknown	20914000	0	35739000	0	18541000	0	40228000	0	47921000	0	38894000	0	43395000	-1	77322000	0	36430000	0	1	0	1	0	1	0	1	0	1	0	1	0	1	0	1	0	1	0	29	0	28	0	21	0	25	0
Protein arginine N-methyltransferase 2 OS=Saccharomyces cerevisiae (strain ATCC 204508 / S288c) OX=559292 GN=RMT2 PE=1 SV=1	Q03305	RMT2	47 kDa		unknown	30407000	0	35894000	0	21378000	0	33864000	-1	62023000	0	46007000	0	60246000	0	69013000	0	48488000	-1	1	0	1	0	1	0	1	0	1	0	1	0	1	0	1	0	1	0	22	0	25	0	16	0	21	0
60S ribosomal protein L39 OS=Saccharomyces cerevisiae (strain ATCC 204508 / S288c) OX=559292 GN=RPL39 PE=1 SV=3	P04650	RPL39	6 kDa		unknown	5799500000	-1	4537300000	3113200000	5391500000	6741100000	7720900000	1704000000	4294400000	1062900000	4982500000	873940000	6732300000	4702000000	147330000	4028900000	4785100000	3304200000	1	0	1	1	1	1	1	1	1	1	1	1	1	1	0.97	1	1	1	17	0	14	7	53	8	26	3
Cluster of 60S ribosomal protein L37-A OS=Saccharomyces cerevisiae (strain ATCC 204508 / S288c) OX=559292 GN=RPL37A PE=1 SV=2 (P49166)	P49166 [2]	RPL37A	10 kDa	TRUE	unknown	22463000	0	29880000	0	40886000	-1	122560	0	9837700	0	9768400	-1	10969000	-1	4566200	0	6032100	0	1	0	1	0	1	0.06	1	0.19	1	0	1	0.06	1	0	1	0.6	1	0.13	39	0	43	0	38	0	5	0
Homoaconitase, mitochondrial OS=Saccharomyces cerevisiae (strain ATCC 204508 / S288c) OX=559292 GN=LYS4 PE=1 SV=1	P49367	LYS4	75 kDa		unknown	3227000	0	3790600	0	8669700	0	7562700	0	13253000	0	7076300	0	996980	0	3608900	0	5043000	0	1	0	1	0	1	0	1	0	1	0.05	1	0	1	0	1	0	1	0	27	0	29	0	31	0	28	0
Translation initiation factor eIF-2B subunit alpha OS=Saccharomyces cerevisiae (strain ATCC 204508 / S288c) OX=559292 GN=GCN3 PE=1 SV=1	P14741	GCN3	34 kDa		unknown	23119000	0	41908000	0	27559000	0	61878000	0	38724000	0	52673000	0	48175000	6888900	74131000	0	56157000	0	1	0	1	0	1	0	1	0.14	1	0	1	0	1	0.95	1	0	1	0	16	0	22	0	19	0	24	0
Mitochondrial import receptor subunit TOM40 OS=Saccharomyces cerevisiae (strain ATCC 204508 / S288c) OX=559292 GN=TOM40 PE=1 SV=1	P23644	TOM40	42 kDa		unknown	25603000	0	43496000	0	53741000	0	264510000	-1	33772000	-1	49032000	0	53628000	-1	51895000	0	36290000	0	1	0	1	0	1	0	1	0	1	0	1	0	1	0	1	0	1	0	21	0	26	0	26	0	39	0
Dolichyl-phosphate-mannose--protein mannosyltransferase 2 OS=Saccharomyces cerevisiae (strain ATCC 204508 / S288c) OX=559292 GN=PMT2 PE=1 SV=2	P31382	PMT2	87 kDa	TRUE	unknown	13738000	0	18645000	0	13198000	0	18775000	0	11594000	0	13864000	0	12846000	6101500	15612000	0	13015000	0	1	0	1	0	1	0	1	0	1	0.08	1	0	1	0.99	1	0	1	0	28	0	25	0	19	0	23	0
Enhancer of translation termination 1 OS=Saccharomyces cerevisiae (strain ATCC 204508 / S288c) OX=559292 GN=ETT1 PE=1 SV=1	Q08421	ETT1	47 kDa		unknown	39175000	0	34494000	0	44616000	0	71696000	0	39757000	0	49500000	12982000	48958000	10779000	88050000	0	45626000	0	1	0.28	1	0.43	1	0	1	0.45	1	0.07	1	1	1	1	1	0	1	0.08	29	0	20	0	25	0	27	0
Dolichyl-diphosphooligosaccharide--protein glycosyltransferase subunit WBP1 OS=Saccharomyces cerevisiae (strain ATCC 204508 / S288c) OX=559292 GN=WBP1 PE=1 SV=1	P33767	WBP1	49 kDa		unknown	20576000	0	21952000	0	22665000	0	73239000	0	36085000	0	36632000	0	25574000	-1	38252000	0	33657000	0	1	0	1	0	1	0	1	0.12	1	0	1	0	1	0	1	0	1	0	30	0	27	0	23	0	31	0
Sphingolipid long chain base-responsive protein PIL1 OS=Saccharomyces cerevisiae (strain ATCC 204508 / S288c) OX=559292 GN=PIL1 PE=1 SV=1	P53252	PIL1	38 kDa	TRUE	unknown	32544000	0	64373000	0	53485000	0	60307000	0	78913000	0	68066000	11169000	55469000	-1	63306000	-1	60702000	0	1	0	1	0	1	0	1	0	1	0	1	0.95	1	0	1	0	1	0	21	0	30	0	26	0	21	0
Tyrosine-protein phosphatase YVH1 OS=Saccharomyces cerevisiae (strain ATCC 204508 / S288c) OX=559292 GN=YVH1 PE=1 SV=1	Q02256	YVH1	41 kDa		unknown	25652000	0	29414000	0	29536000	0	18973000	-1	10439000	0	16791000	0	10863000	0	13369000	0	36016000	0	1	0	1	0	1	0	1	0	1	0	1	0	1	0	1	0	1	0	26	0	27	0	31	0	26	0
Cluster of Glycerol-1-phosphate phosphohydrolase 1 OS=Saccharomyces cerevisiae (strain ATCC 204508 / S288c) OX=559292 GN=GPP1 PE=1 SV=3 (P41277)	P41277 [2]	GPP1	28 kDa	TRUE	unknown	46447000	0	43829000	-1	57016000	0	57184000	-1	84524000	0	57186000	-1	46855000	0	59924000	0	49388000	0	1	0	1	0	1	0	1	0	1	0	1	0	1	0.95	1	0	1	0	30	0	23	0	28	0	17	0
ATP-dependent clpX-like chaperone, mitochondrial OS=Saccharomyces cerevisiae (strain ATCC 204508 / S288c) OX=559292 GN=MCX1 PE=1 SV=1	P38323	MCX1	58 kDa		unknown	6395600	0	11401000	0	13217000	0	13541000	-1	12543000	0	17825000	0	12790000	0	11992000	0	17526000	0	1	0.06	1	0	1	0	1	0	1	0	1	0	1	0	1	0	1	0.09	24	0	23	0	31	0	24	0
Cluster of 6-phosphogluconate dehydrogenase, decarboxylating 1 OS=Saccharomyces cerevisiae (strain ATCC 204508 / S288c) OX=559292 GN=GND1 PE=1 SV=1 (P38720)	P38720 [2]	GND1	54 kDa	TRUE	unknown	8038300	0	7680500	0	8607100	0	7670900	-1	21213000	0	9623300	0	10661000	0	10935000	-1	13711000	0	1	0.97	1	0	1	0.65	1	0.15	1	0	1	0	1	0	1	0.07	1	0.22	20	4	19	0	16	0	20	0
Nucleoporin NIC96 OS=Saccharomyces cerevisiae (strain ATCC 204508 / S288c) OX=559292 GN=NIC96 PE=1 SV=2	P34077	NIC96	96 kDa		unknown	2579600	0	4250000	0	2817400	0	9230000	0	8700000	0	6486100	0	2938000	0	11780000	0	1785400	0	1	0	1	0	1	0	1	0	1	0	1	0	1	0	1	0	1	0.14	19	0	19	0	17	0	25	0
Cargo-transport protein YPP1 OS=Saccharomyces cerevisiae (strain ATCC 204508 / S288c) OX=559292 GN=YPP1 PE=1 SV=1	P46951	YPP1	95 kDa		unknown	2150200	0	2793900	0	3309900	-1	8141000	0	6131200	0	9175300	0	5115000	0	10486000	0	5964700	0	1	0	1	0	1	0	1	0	1	0	1	0	1	0	1	0	1	0	19	0	16	0	18	0	25	0
Elongation factor Tu, mitochondrial OS=Saccharomyces cerevisiae (strain ATCC 204508 / S288c) OX=559292 GN=TUF1 PE=1 SV=1	P02992	TUF1	48 kDa		unknown	17018000	0	17624000	0	6661100	0	8922100	0	19248000	0	8858300	0	10571000	0	10338000	0	9039200	93401000	1	0	1	0	1	0	1	0	1	0	1	0	1	0	1	0.75	1	1	37	0	33	0	18	0	14	0
U3 small nucleolar RNA-associated protein 9 OS=Saccharomyces cerevisiae (strain ATCC 204508 / S288c) OX=559292 GN=UTP9 PE=1 SV=1	P38882	UTP9	65 kDa		unknown	10581000	0	10885000	0	9342900	0	10481000	0	10583000	0	16529000	0	15155000	0	18569000	0	13036000	0	1	0	1	0	1	0	1	0	1	0.16	1	0	1	0	1	0	1	0.26	35	0	23	0	24	0	20	0
DNA mismatch repair protein MSH2 OS=Saccharomyces cerevisiae (strain ATCC 204508 / S288c) OX=559292 GN=MSH2 PE=1 SV=2	P25847	MSH2	109 kDa		unknown	4247700	0	3654300	0	3143500	0	3562100	0	6342400	0	3384400	0	2462800	0	6016500	0	4899500	0	1	0	1	0	1	0	1	0	1	0	1	0	1	0	1	0	1	0	30	0	26	0	16	0	19	0
Nuclear segregation protein BFR1 OS=Saccharomyces cerevisiae (strain ATCC 204508 / S288c) OX=559292 GN=BFR1 PE=1 SV=1	P38934	BFR1	55 kDa		unknown	5342000	0	8205400	-1	4783600	0	11395000	0	6979400	0	9199300	0	12672000	0	7670600	0	8604100	0	1	0	1	0	1	0	1	0.11	1	0.1	1	0	1	0	1	0	1	0	20	0	27	0	16	0	22	0
RNA-binding protein MRN1 OS=Saccharomyces cerevisiae (strain ATCC 204508 / S288c) OX=559292 GN=MRN1 PE=1 SV=1	Q08925	MRN1	69 kDa		unknown	6261100	0	5776400	0	4808200	0	13069000	-1	13602000	0	15099000	1431600	13037000	2831200	25486000	0	9816900	-1	1	0	1	0	1	0	1	0	1	0	1	0.95	1	1	1	0	1	0	19	0	19	0	15	0	25	0
SRP-independent targeting protein 3 OS=Saccharomyces cerevisiae (strain ATCC 204508 / S288c) OX=559292 GN=PHO88 PE=1 SV=1	P38264	PHO88	21 kDa		unknown	38721000	0	50703000	0	30662000	0	125800000	0	41804000	0	54994000	0	38637000	0	6670500	0	45327000	0	1	0	1	0	1	0	1	0	1	0.08	1	0	1	0	1	0	1	0	38	0	45	0	31	0	38	0
FK506-binding nuclear protein OS=Saccharomyces cerevisiae (strain ATCC 204508 / S288c) OX=559292 GN=FPR3 PE=1 SV=2	P38911	FPR3	47 kDa	TRUE	unknown	285340000	0	209010000	0	102270000	0	175720000	-1	121430000	0	188440000	0	132100000	11042000	79671000	-1	173430000	-1	1	0	1	0	1	0	1	0	1	0	1	0.09	1	0.95	1	0	1	0	34	0	32	0	24	0	19	0
SED5-binding protein 2 OS=Saccharomyces cerevisiae (strain ATCC 204508 / S288c) OX=559292 GN=SFB2 PE=1 SV=1	P53953	SFB2	99 kDa	TRUE	unknown	2357400	0	2751200	0	2437100	0	3782200	-1	6476000	0	8144200	0	3905400	0	2654400	0	4661600	0	1	0	1	0	1	0	1	0	1	0	1	0	1	0	1	0	1	0	24	0	17	0	18	0	20	0
Elongator complex protein 3 OS=Saccharomyces cerevisiae (strain ATCC 204508 / S288c) OX=559292 GN=ELP3 PE=1 SV=1	Q02908	ELP3	64 kDa		unknown	8262600	0	7718000	0	8837200	0	12620000	0	10891000	0	12396000	0	12960000	0	19972000	0	12855000	-1	1	0	1	0	1	0	1	0	1	0	1	0	1	0	1	0	1	0	22	0	25	0	16	0	22	0
DNA-directed RNA polymerase III subunit RPC1 OS=Saccharomyces cerevisiae (strain ATCC 204508 / S288c) OX=559292 GN=RPO31 PE=1 SV=1	P04051	RPO31	162 kDa		unknown	294090	0	1179700	0	1729700	0	2096500	0	5603000	0	2278200	0	693970	0	4104300	0	1911700	0	1	0.05	1	0	1	0	1	0	1	0	1	0	1	0	1	0	1	0.1	12	0	21	0	25	0	29	0
High-affinity glutamine permease OS=Saccharomyces cerevisiae (strain ATCC 204508 / S288c) OX=559292 GN=GNP1 PE=1 SV=2	P48813	GNP1	74 kDa		unknown	13379000	0	17222000	0	13652000	0	16648000	0	23486000	0	15922000	0	17751000	5225800	31290000	0	19864000	0	1	0	1	0	1	0	1	0	1	0	1	0	1	1	1	0	1	0	23	0	29	0	18	0	19	0
Transketolase 1 OS=Saccharomyces cerevisiae (strain ATCC 204508 / S288c) OX=559292 GN=TKL1 PE=1 SV=4	P23254	TKL1	74 kDa		unknown	4549900	0	6588800	0	7220800	0	10003000	0	14187000	0	20997000	0	13926000	0	11626000	-1	8862600	-1	1	0	1	0	1	0	1	0	1	0	1	0	1	0	1	0	1	0	21	0	23	0	19	0	22	0
Serine hydroxymethyltransferase, cytosolic OS=Saccharomyces cerevisiae (strain ATCC 204508 / S288c) OX=559292 GN=SHM2 PE=1 SV=2	P37291	SHM2	52 kDa	TRUE	unknown	21825000	0	27370000	0	18815000	0	15190000	-1	22117000	0	19802000	0	14627000	-1	15962000	0	11578000	0	1	0	1	0	1	0	1	0	1	0	1	0	1	0	1	0	1	0	34	0	33	0	23	0	22	0
U3 small nucleolar RNA-associated protein 7 OS=Saccharomyces cerevisiae (strain ATCC 204508 / S288c) OX=559292 GN=UTP7 PE=1 SV=1	P40055	UTP7	62 kDa		unknown	14379000	0	15021000	0	5951000	0	5295300	0	7237000	0	10612000	0	15158000	0	8323300	0	13622000	0	1	0.16	1	0.28	1	0	1	0	1	0.07	1	0.05	1	0	1	0.13	1	0.29	32	0	30	0	16	0	20	0
Phosphomannomutase OS=Saccharomyces cerevisiae (strain ATCC 204508 / S288c) OX=559292 GN=SEC53 PE=1 SV=1	P07283	SEC53	29 kDa		unknown	17239000	0	16684000	0	23231000	-1	22068000	-1	31779000	-1	31009000	0	31111000	-1	57665000	0	25699000	0	1	0	1	0	1	0	1	0	1	0	1	0	1	0	1	0	1	0	23	0	22	0	17	0	14	0
D-2-hydroxyglutarate--pyruvate transhydrogenase DLD3 OS=Saccharomyces cerevisiae (strain ATCC 204508 / S288c) OX=559292 GN=DLD3 PE=1 SV=1	P39976	DLD3	55 kDa		unknown	34266000	0	23400000	0	14020000	0	19313000	0	47633000	0	25776000	0	8254800	0	11050000	0	11014000	0	1	0	1	0	1	0	1	0	1	0	1	0	1	0	1	0	1	0	12	0	7	0	9	0	10	0
RNA annealing protein YRA1 OS=Saccharomyces cerevisiae (strain ATCC 204508 / S288c) OX=559292 GN=YRA1 PE=1 SV=2	Q12159	YRA1	25 kDa		unknown	71058000	0	116600000	-1	56115000	0	77729000	0	43738000	0	54764000	0	219900000	11933000	127380000	0	77842000	0	1	0.06	1	0	1	0	1	0.06	1	0	1	0	1	0.29	1	0	1	0	26	0	33	0	15	0	17	0
H/ACA ribonucleoprotein complex subunit GAR1 OS=Saccharomyces cerevisiae (strain ATCC 204508 / S288c) OX=559292 GN=GAR1 PE=1 SV=1	P28007	GAR1	21 kDa		unknown	178150000	0	180170000	0	106780000	0	159420000	0	114370000	0	155920000	0	185170000	0	249370000	0	169440000	0	1	0.13	1	0	1	0.07	1	0.1	1	0.19	1	0.38	1	0	1	0.13	1	0.06	38	0	32	0	31	0	19	0
tRNA wybutosine-synthesizing protein 4 OS=Saccharomyces cerevisiae (strain ATCC 204508 / S288c) OX=559292 GN=PPM2 PE=1 SV=2	Q08282	PPM2	79 kDa		unknown	3936200	0	3083300	0	4285000	0	6761400	0	6264100	0	5936100	0	4143900	0	11882000	0	5338700	0	1	0.06	1	0	1	0	1	0	1	0	1	0	1	0	1	0	1	0	13	0	15	0	28	0	27	0
RNA-binding protein NAB6 OS=Saccharomyces cerevisiae (strain ATCC 204508 / S288c) OX=559292 GN=NAB6 PE=1 SV=1	Q03735	NAB6	126 kDa		unknown	1148400	0	2279300	0	5773200	0	9527200	0	3603600	0	4589000	0	4505600	2989500	8130700	0	2606500	0	1	0	1	0	1	0	1	0	1	0.06	1	0	1	0.99	1	0	1	0	11	0	15	0	28	0	29	0
Glucose-signaling factor 2 OS=Saccharomyces cerevisiae (strain ATCC 204508 / S288c) OX=559292 GN=GSF2 PE=1 SV=1	Q04697	GSF2	46 kDa		unknown	19782000	0	25274000	0	34347000	0	33847000	0	37268000	0	44350000	0	30083000	3847100	49039000	-1	41641000	0	1	0	1	0	1	0	1	0	1	0	1	0	1	0.95	1	0	1	0.07	21	0	25	0	25	0	22	0
Proteasome subunit alpha type-1 OS=Saccharomyces cerevisiae (strain ATCC 204508 / S288c) OX=559292 GN=SCL1 PE=1 SV=1	P21243	SCL1	28 kDa		unknown	27116000	0	25588000	0	14415000	0	29109000	0	24968000	-1	19050000	6403200	32963000	0	24219000	0	16170000	-1	1	0	1	0	1	0	1	0.7	1	0	1	0.91	1	0.14	1	0.97	1	0	27	0	23	0	15	0	21	1
Protein transport protein SEC23 OS=Saccharomyces cerevisiae (strain ATCC 204508 / S288c) OX=559292 GN=SEC23 PE=1 SV=1	P15303	SEC23	85 kDa		unknown	5502700	-1	2831000	-1	6674300	0	7080200	0	6485800	0	9515600	0	6393600	0	12204000	0	9033700	0	1	0	1	0	1	0	1	0	1	0	1	0	1	0	1	0	1	0	21	0	18	0	19	0	20	0
Vacuolar transporter chaperone 4 OS=Saccharomyces cerevisiae (strain ATCC 204508 / S288c) OX=559292 GN=VTC4 PE=1 SV=2	P47075	VTC4	83 kDa		unknown	798620	0	1287300	0	6775000	0	31718000	0	13515000	-1	4814400	0	8446000	0	6042800	0	6023500	0	1	0.05	1	0	1	0	1	0	1	0	1	0	1	0	1	0	1	0.07	4	0	9	0	26	0	39	0
Alpha-1,2-mannosyltransferase ALG9 OS=Saccharomyces cerevisiae (strain ATCC 204508 / S288c) OX=559292 GN=ALG9 PE=1 SV=1	P53868	ALG9	64 kDa		unknown	11214000	-1	13101000	-1	20251000	0	14220000	0	14367000	0	19397000	0	7991900	0	26653000	0	21728000	-1	1	0	1	0	1	0	1	0	1	0	1	0	1	0.15	1	0	1	0	28	0	24	0	25	0	21	0
DNA replication licensing factor MCM7 OS=Saccharomyces cerevisiae (strain ATCC 204508 / S288c) OX=559292 GN=MCM7 PE=1 SV=4	P38132	MCM7	95 kDa		unknown	15026000	0	1748300	0	4373100	0	5106000	0	5059100	0	7555700	0	2549000	0	6400400	0	4943000	0	1	0	1	0	1	0	1	0	1	0.1	1	0	1	0	1	0	1	0.08	19	0	23	0	21	0	25	0
Cytoplasmic 60S subunit biogenesis factor REI1 OS=Saccharomyces cerevisiae (strain ATCC 204508 / S288c) OX=559292 GN=REI1 PE=1 SV=3	P38344	REI1	46 kDa		unknown	11916000	0	14366000	0	10747000	-1	6360100	0	21398000	0	20791000	0	13997000	-1	24654000	0	13651000	0	1	0.19	1	0	1	0	1	0.21	1	0	1	0	1	0	1	0	1	0	24	0	27	0	19	0	9	0
Serine--tRNA ligase, cytoplasmic OS=Saccharomyces cerevisiae (strain ATCC 204508 / S288c) OX=559292 GN=SES1 PE=1 SV=2	P07284	SES1	53 kDa		unknown	6808100	0	8508600	0	9934000	0	9840700	0	17586000	-1	13210000	-1	12060000	0	22000000	0	18590000	0	1	0.13	1	0	1	0	1	0	1	0	1	0	1	0	1	0	1	0	14	0	19	0	18	0	15	0
Prohibitin-1 OS=Saccharomyces cerevisiae (strain ATCC 204508 / S288c) OX=559292 GN=PHB1 PE=1 SV=2	P40961	PHB1	31 kDa		unknown	22689000	0	33564000	0	34339000	0	175700000	30411000	32274000	0	27170000	0	21570000	0	29797000	0	23812000	0	1	0	1	0	1	0	1	1	1	0	1	0	1	0	1	0	1	0	24	0	26	0	20	0	42	3
54S ribosomal protein YmL6, mitochondrial OS=Saccharomyces cerevisiae (strain ATCC 204508 / S288c) OX=559292 GN=YML6 PE=1 SV=1	P51998	YML6	32 kDa		unknown	13381000	0	22889000	-1	23603000	0	25806000	0	40272000	0	26593000	0	22687000	1389600	32877000	0	21695000	-1	1	0	1	0	1	0	1	0	1	0	1	0	1	0.29	1	0	1	0	20	0	23	0	22	0	21	0
GMP synthase [glutamine-hydrolyzing] OS=Saccharomyces cerevisiae (strain ATCC 204508 / S288c) OX=559292 GN=GUA1 PE=1 SV=4	P38625	GUA1	58 kDa		unknown	10109000	0	14790000	0	7105500	0	10436000	0	16043000	-1	14634000	0	13338000	0	21816000	0	12745000	0	1	0.08	1	0	1	0	1	0	1	0	1	0	1	0	1	0	1	0	22	0	19	0	11	0	16	0
C-1-tetrahydrofolate synthase, cytoplasmic OS=Saccharomyces cerevisiae (strain ATCC 204508 / S288c) OX=559292 GN=ADE3 PE=1 SV=1	P07245	ADE3	102 kDa	TRUE	unknown	1860100	0	2827800	0	3548200	0	4087000	0	14777000	0	8987200	0	4077900	0	3019300	0	3528600	0	1	0	1	0	1	0	1	0	1	0.09	1	0	1	0	1	0	1	0	14	0	16	0	20	0	21	0
Eukaryotic translation initiation factor 2 subunit gamma OS=Saccharomyces cerevisiae (strain ATCC 204508 / S288c) OX=559292 GN=GCD11 PE=1 SV=1	P32481	GCD11	58 kDa		unknown	13571000	0	11776000	0	10101000	0	19362000	0	19924000	0	11679000	-1	14212000	0	5834500	0	16783000	0	1	0.07	1	0	1	0	1	0	1	0	1	0	1	0	1	0	1	0	31	0	25	0	18	0	26	0
ATPase family gene 2 protein OS=Saccharomyces cerevisiae (strain ATCC 204508 / S288c) OX=559292 GN=AFG2 PE=1 SV=1	P32794	AFG2	85 kDa	TRUE	unknown	2735500	0	3220300	0	830020	0	1649100	0	10354000	0	6279400	0	6960400	0	6835300	0	6581600	0	1	0	1	0	1	0	1	0	1	0	1	0	1	0	1	0	1	0	18	0	16	0	7	0	13	0
Adenylyltransferase and sulfurtransferase UBA4 OS=Saccharomyces cerevisiae (strain ATCC 204508 / S288c) OX=559292 GN=UBA4 PE=1 SV=1	P38820	UBA4	49 kDa		unknown	5236500	0	8931700	0	12588000	0	18360000	0	22997000	0	22324000	0	18442000	0	31545000	0	16668000	0	1	0	1	0	1	0	1	0	1	0	1	0	1	0.84	1	0	1	0	13	0	14	0	17	0	20	0
Mitochondrial respiratory chain complexes assembly protein YTA12 OS=Saccharomyces cerevisiae (strain ATCC 204508 / S288c) OX=559292 GN=YTA12 PE=1 SV=2	P40341	YTA12	93 kDa	TRUE	unknown	1438700	69494000	1954500	48702000	1960700	0	8257600	0	5202500	0	2852200	21166000	2151700	11852000	5274600	0	2103400	29815000	1	0.28	1	0.33	1	0.65	1	0.69	1	0	1	0.09	1	0.07	1	0.1	1	0.17	14	1	12	2	12	1	32	0
Hexokinase-2 OS=Saccharomyces cerevisiae (strain ATCC 204508 / S288c) OX=559292 GN=HXK2 PE=1 SV=4	P04807	HXK2	54 kDa	TRUE	unknown	3604700	0	8782500	0	2998400	0	14198000	0	12620000	0	7948800	0	10196000	0	8119400	0	8494900	0	1	0	1	0	1	0	1	0	1	0	1	0	1	0	1	0	1	0	16	0	20	0	14	0	25	0
Serine/threonine-protein kinase SCH9 OS=Saccharomyces cerevisiae (strain ATCC 204508 / S288c) OX=559292 GN=SCH9 PE=1 SV=3	P11792	SCH9	92 kDa		unknown	9344300	0	8194800	0	7029000	0	8948500	0	10314000	0	11604000	0	9898300	709200	16536000	0	9047700	-1	1	0.18	1	0	1	0	1	0	1	0.07	1	0	1	0.6	1	0.11	1	0	23	0	18	0	13	0	18	0
IML2-like protein YKR018C OS=Saccharomyces cerevisiae (strain ATCC 204508 / S288c) OX=559292 GN=YKR018C PE=1 SV=1	P36114	YKR018C	82 kDa		unknown	6295500	0	7120900	0	7809600	0	7045600	0	15214000	0	11437000	0	5474900	0	11293000	0	5061900	0	1	0	1	0	1	0	1	0.06	1	0	1	0.23	1	0	1	0	1	0	18	0	21	0	19	0	22	0
Transcription-associated protein 1 OS=Saccharomyces cerevisiae (strain ATCC 204508 / S288c) OX=559292 GN=TRA1 PE=1 SV=1	P38811	TRA1	433 kDa		unknown	164020	0	196770	0	237480	0	667670	0	457970	0	744990	0	489880	0	649250	0	340510	0	1	0.06	1	0.34	1	0	1	0.06	1	0	1	0.08	1	0.18	1	0	1	0	12	0	14	0	12	0	21	0
NADPH--cytochrome P450 reductase OS=Saccharomyces cerevisiae (strain ATCC 204508 / S288c) OX=559292 GN=NCP1 PE=1 SV=3	P16603	NCP1	77 kDa		unknown	3558100	0	3747400	0	3934100	0	7376500	0	4138400	-1	8336000	0	6127200	0	10359000	0	6726100	0	1	0	1	0	1	0	1	0	1	0	1	0	1	0	1	0	1	0	19	0	19	0	17	0	22	0
Pre-rRNA-processing protein PNO1 OS=Saccharomyces cerevisiae (strain ATCC 204508 / S288c) OX=559292 GN=PNO1 PE=1 SV=1	Q99216	PNO1	30 kDa		unknown	38049000	0	37461000	0	33599000	0	33380000	0	30971000	0	34584000	8668100	35108000	9943500	34467000	0	20767000	0	1	0	1	0	1	0.11	1	0.38	1	0	1	1	1	1	1	0	1	0	28	0	23	0	25	0	11	0
Mitochondrial glycine transporter YMC1 OS=Saccharomyces cerevisiae (strain ATCC 204508 / S288c) OX=559292 GN=YMC1 PE=1 SV=2	P32331	YMC1	33 kDa		unknown	16127000	0	19952000	0	29279000	0	27994000	0	16587000	-1	21665000	0	16032000	0	21098000	0	28543000	-1	1	0	1	0	1	0	1	0	1	0	1	0	1	0.66	1	0	1	0	20	0	24	0	24	0	23	0
26S proteasome regulatory subunit RPN3 OS=Saccharomyces cerevisiae (strain ATCC 204508 / S288c) OX=559292 GN=RPN3 PE=1 SV=5	P40016	RPN3	60 kDa		unknown	3805800	0	7766800	0	4750200	0	7005500	0	29764000	0	20623000	0	8327700	0	8209000	0	8329000	0	1	0	1	0	1	0	1	0	1	0	1	0	1	0	1	0	1	0.08	20	0	20	0	11	0	10	0
Protein GCN20 OS=Saccharomyces cerevisiae (strain ATCC 204508 / S288c) OX=559292 GN=GCN20 PE=1 SV=1	P43535	GCN20	85 kDa		unknown	2379800	0	2159400	0	6002300	0	3254600	0	4688100	0	10487000	0	5842100	0	41185000	0	14215000	0	1	0	1	0	1	0.31	1	0	1	0	1	0	1	0.87	1	0.92	1	0	13	0	12	0	15	0	8	0
Nucleoporin NUP85 OS=Saccharomyces cerevisiae (strain ATCC 204508 / S288c) OX=559292 GN=NUP85 PE=1 SV=1	P46673	NUP85	85 kDa		unknown	3058100	0	4379400	0	2779700	0	6469300	0	7693100	0	8249600	0	6137000	0	5132400	0	3129400	0	1	0	1	0.96	1	0	1	0	1	0	1	0	1	0	1	0	1	0	18	0	21	1	17	0	16	0
Nucleolar complex protein 4 OS=Saccharomyces cerevisiae (strain ATCC 204508 / S288c) OX=559292 GN=NOC4 PE=1 SV=1	Q06512	NOC4	64 kDa		unknown	6439300	0	9958300	0	5271300	0	2804300	0	11049000	0	18984000	0	11332000	0	24688000	0	10168000	0	1	0	1	0	1	0	1	0.24	1	0	1	0	1	0	1	0	1	0	16	0	23	0	15	0	18	0
60S acidic ribosomal protein P1-alpha OS=Saccharomyces cerevisiae (strain ATCC 204508 / S288c) OX=559292 GN=RPP1A PE=1 SV=4	P05318	RPP1A	11 kDa	TRUE	unknown	11874000	-1	15381000	-1	22046000	-1	1915300	0	50387000	-1	73263000	-1	231180000	13950000	129010000	-1	214100000	0	1	0	1	0	1	0	1	0	1	0	1	0	1	0.95	1	0	1	0	11	0	8	0	7	0	8	0
N-terminal acetyltransferase A complex subunit NAT1 OS=Saccharomyces cerevisiae (strain ATCC 204508 / S288c) OX=559292 GN=NAT1 PE=1 SV=2	P12945	NAT1	99 kDa		unknown	4292700	0	2674400	0	1647000	0	1938700	0	11314000	0	8652100	0	4802000	0	3003100	0	5091100	0	1	0	1	0	1	0	1	0	1	0	1	0	1	0	1	0	1	0	18	0	12	0	6	0	11	0
FACT complex subunit SPT16 OS=Saccharomyces cerevisiae (strain ATCC 204508 / S288c) OX=559292 GN=SPT16 PE=1 SV=1	P32558	SPT16	119 kDa		unknown	1601000	0	2562200	0	1317900	0	1724500	0	1495200	0	2411600	0	1696000	0	3340300	0	2015600	0	1	0	1	0	1	0	1	0	1	0	1	0	1	0	1	0	1	0	21	0	19	0	13	0	15	0
Cluster of Pyruvate carboxylase 2 OS=Saccharomyces cerevisiae (strain ATCC 204508 / S288c) OX=559292 GN=PYC2 PE=1 SV=2 (P32327)	P32327 [2]	PYC2	130 kDa	TRUE	unknown	3250700	0	3269000	0	3532900	0	4645500	0	9507700	0	3958900	0	1749900	0	6303400	0	4122500	0	1	0.58	1	0.87	1	0	1	0	1	0	1	0.07	1	0	1	0	1	0.2	18	0	15	0	15	0	20	0
Translationally-controlled tumor protein homolog OS=Saccharomyces cerevisiae (strain ATCC 204508 / S288c) OX=559292 GN=TMA19 PE=1 SV=1	P35691	TMA19	19 kDa		unknown	166040000	0	181390000	0	261790000	0	304770000	0	114750000	0	153100000	-1	178210000	-1	243700000	-1	182050000	-1	1	0	1	0	1	0	1	0	1	0	1	0	1	0	1	0	1	0	25	0	27	0	31	0	23	0
Dimethyladenosine transferase OS=Saccharomyces cerevisiae (strain ATCC 204508 / S288c) OX=559292 GN=DIM1 PE=1 SV=1	P41819	DIM1	36 kDa		unknown	16067000	0	18784000	0	18302000	0	16202000	0	19349000	0	34536000	0	22101000	0	29183000	0	20358000	0	1	0	1	0	1	0.27	1	0	1	0	1	0	1	0.94	1	0	1	0	18	0	18	0	12	0	16	0
Cluster of Protein MRH1 OS=Saccharomyces cerevisiae (strain ATCC 204508 / S288c) OX=559292 GN=MRH1 PE=1 SV=1 (Q12117)	Q12117 [2]	MRH1	36 kDa	TRUE	unknown	90006000	0	88618000	0	104140000	0	117450000	0	69523000	-1	48671000	0	51607000	0	54944000	0	86179000	0	1	0	1	0.97	1	0	1	0.98	1	0	1	0.35	1	0.21	1	0.14	1	0	26	0	16	3	28	0	21	2
Coatomer subunit epsilon OS=Saccharomyces cerevisiae (strain ATCC 204508 / S288c) OX=559292 GN=SEC28 PE=1 SV=2	P40509	SEC28	34 kDa		unknown	28290000	-1	40954000	0	38915000	-1	44753000	-1	22423000	-1	48217000	-1	37815000	0	43802000	-1	49156000	0	1	0	1	0	1	0	1	0	1	0	1	0	1	0	1	0	1	0	21	0	25	0	17	0	20	0
37S ribosomal protein NAM9, mitochondrial OS=Saccharomyces cerevisiae (strain ATCC 204508 / S288c) OX=559292 GN=NAM9 PE=1 SV=2	P27929	NAM9	56 kDa		unknown	4620400	0	4112900	0	9347100	0	8385800	0	11076000	0	7436100	0	8585300	0	7858900	0	6071800	0	1	0	1	0	1	0.26	1	0	1	0	1	0	1	0	1	0	1	0	18	0	17	0	18	0	19	0
TATA-binding protein-associated factor MOT1 OS=Saccharomyces cerevisiae (strain ATCC 204508 / S288c) OX=559292 GN=MOT1 PE=1 SV=1	P32333	MOT1	210 kDa		unknown	502120	0	622640	0	656470	0	1045100	0	881200	0	1479200	0	804660	0	1888700	9168000	940290	4444000	1	0.17	1	0	1	0	1	0	1	0.95	1	0.13	1	0	1	0.88	1	0.9	14	0	14	0	9	0	21	0
DnaJ homolog 1, mitochondrial OS=Saccharomyces cerevisiae (strain ATCC 204508 / S288c) OX=559292 GN=MDJ1 PE=1 SV=1	P35191	MDJ1	56 kDa		unknown	6598000	0	5878000	0	6744500	0	9962600	0	12015000	0	9702200	0	9486500	0	9356300	0	9092400	0	1	0	1	0	1	0	1	0	1	0	1	0	1	0	1	0	1	0	14	0	11	0	9	0	16	0
External NADH-ubiquinone oxidoreductase 1, mitochondrial OS=Saccharomyces cerevisiae (strain ATCC 204508 / S288c) OX=559292 GN=NDE1 PE=1 SV=1	P40215	NDE1	63 kDa		unknown	4464100	0	1960200	0	5389500	0	8284800	0	6998500	0	4260200	0	5016900	0	1817400	0	3904900	0	1	0	1	0	1	0	1	0.13	1	0	1	0	1	0	1	0	1	0.19	21	0	18	0	18	0	26	0
Dolichyl-phosphate-mannose--protein mannosyltransferase 4 OS=Saccharomyces cerevisiae (strain ATCC 204508 / S288c) OX=559292 GN=PMT4 PE=1 SV=1	P46971	PMT4	88 kDa		unknown	7945100	0	22430000	0	8405700	-1	45711000	0	11003000	0	10563000	0	4290900	-1	11189000	0	8625200	0	1	0.15	1	0.19	1	0	1	0	1	0	1	0	1	0	1	0	1	0	17	0	30	0	16	0	34	0
Aromatic/aminoadipate aminotransferase 1 OS=Saccharomyces cerevisiae (strain ATCC 204508 / S288c) OX=559292 GN=ARO8 PE=1 SV=1	P53090	ARO8	56 kDa		unknown	4539800	0	3477200	0	3680500	0	4822900	0	33920000	0	14575000	0	8532900	0	11978000	0	12079000	0	1	0.11	1	0	1	0	1	0	1	0	1	0	1	0	1	0	1	0	15	0	13	0	12	0	13	0
mRNA transport regulator MTR10 OS=Saccharomyces cerevisiae (strain ATCC 204508 / S288c) OX=559292 GN=MTR10 PE=1 SV=1	Q99189	MTR10	111 kDa		unknown	765100	0	1976500	0	3888200	0	4341600	0	3985300	0	5353200	0	3259500	0	7975600	0	4702000	-1	1	0	1	0	1	0	1	0	1	0	1	0	1	0	1	0	1	0	15	0	15	0	18	0	20	0
Vacuolar protein 8 OS=Saccharomyces cerevisiae (strain ATCC 204508 / S288c) OX=559292 GN=VAC8 PE=1 SV=3	P39968	VAC8	63 kDa		unknown	8936400	0	7083700	0	10411000	0	16539000	0	8037100	0	13032000	0	12582000	0	9211700	0	11492000	0	1	0	1	0	1	0	1	0	1	0	1	0	1	0	1	0	1	0	20	0	21	0	20	0	26	0
Triosephosphate isomerase OS=Saccharomyces cerevisiae (strain ATCC 204508 / S288c) OX=559292 GN=TPI1 PE=1 SV=2	P00942	TPI1	27 kDa		unknown	63036000	0	51317000	0	42066000	-1	56180000	0	73131000	0	43374000	0	65324000	0	84014000	0	70830000	0	1	0	1	0	1	0	1	0.42	1	0	1	0	1	0.13	1	0	1	0	28	0	18	0	14	0	15	0
Low specificity L-threonine aldolase OS=Saccharomyces cerevisiae (strain ATCC 204508 / S288c) OX=559292 GN=GLY1 PE=1 SV=2	P37303	GLY1	43 kDa		unknown	8374100	-1	10044000	-1	23416000	0	19808000	0	18889000	0	11706000	0	11157000	0	24284000	0	17601000	0	1	0	1	0	1	0	1	0	1	0	1	0	1	0	1	0	1	0	19	0	16	0	22	0	20	0
m7GpppN-mRNA hydrolase OS=Saccharomyces cerevisiae (strain ATCC 204508 / S288c) OX=559292 GN=DCP2 PE=1 SV=1	P53550	DCP2	109 kDa		unknown	3545800	0	2484700	0	1723600	0	2522400	0	2569400	0	6294700	2539500	5842900	10589000	5910900	0	5558000	0	1	0	1	0	1	0	1	0	1	0.69	1	1	1	1	1	0	1	0	20	0	13	0	13	0	12	0
25S rRNA (cytosine(2278)-C(5))-methyltransferase OS=Saccharomyces cerevisiae (strain ATCC 204508 / S288c) OX=559292 GN=RCM1 PE=1 SV=1	P53972	RCM1	56 kDa		unknown	4702900	0	4357200	0	2029100	0	4298700	0	4286300	0	11588000	0	8445100	0	9471700	0	8864900	0	1	0	1	0	1	0	1	0.23	1	0	1	0	1	0	1	0	1	0.08	20	0	19	0	11	0	16	0
Ubiquitin carboxyl-terminal hydrolase 3 OS=Saccharomyces cerevisiae (strain ATCC 204508 / S288c) OX=559292 GN=UBP3 PE=1 SV=1	Q01477	UBP3	102 kDa		unknown	5781300	0	6811500	0	3832000	0	4266800	0	8122100	0	9396300	0	3805300	0	4597200	0	7290000	0	1	0.24	1	0	1	0	1	0	1	0	1	0	1	0	1	0	1	0	21	0	19	0	12	0	12	0
Multiprotein-bridging factor 1 OS=Saccharomyces cerevisiae (strain ATCC 204508 / S288c) OX=559292 GN=MBF1 PE=1 SV=2	O14467	MBF1	16 kDa		unknown	67896000	0	82555000	-1	91032000	0	79343000	0	47549000	0	46762000	0	60913000	0	54946000	0	50190000	0	1	0	1	0	1	0.23	1	0	1	0	1	0	1	0	1	0	1	0	24	0	22	0	28	0	19	0
U3 small nucleolar ribonucleoprotein protein IMP4 OS=Saccharomyces cerevisiae (strain ATCC 204508 / S288c) OX=559292 GN=IMP4 PE=1 SV=1	P53941	IMP4	33 kDa		unknown	29456000	0	22431000	-1	16959000	-1	27394000	0	27624000	-1	30328000	-1	33754000	-1	24079000	0	16258000	0	1	0	1	0	1	0	1	0	1	0	1	0	1	0	1	0	1	0	25	0	19	0	14	0	20	0
ATP-dependent RNA helicase DBP10 OS=Saccharomyces cerevisiae (strain ATCC 204508 / S288c) OX=559292 GN=DBP10 PE=1 SV=2	Q12389	DBP10	113 kDa		unknown	3481500	0	3087900	0	1742800	0	1544900	0	8868300	0	5509000	0	5230900	0	52687000	0	1825400	0	1	0	1	0	1	0	1	0	1	0	1	0	1	0	1	0	1	0.22	19	0	19	0	11	0	12	0
Nucleoporin NUP145 OS=Saccharomyces cerevisiae (strain ATCC 204508 / S288c) OX=559292 GN=NUP145 PE=1 SV=1	P49687	NUP145	146 kDa		unknown	1729500	0	2145000	0	2394100	0	3128500	0	3169400	0	4265200	0	3830300	0	2372900	0	2141000	0	1	0	1	0.13	1	0	1	0	1	0	1	0	1	0	1	0	1	0	17	0	16	0	12	0	14	0
Dolichyl-diphosphooligosaccharide--protein glycosyltransferase subunit 1 OS=Saccharomyces cerevisiae (strain ATCC 204508 / S288c) OX=559292 GN=OST1 PE=1 SV=1	P41543	OST1	54 kDa		unknown	10319000	0	11598000	0	13780000	-1	32612000	0	36399000	0	29528000	6367600	28711000	0	39362000	-1	29828000	-1	1	0	1	0	1	0	1	0	1	0	1	0.49	1	0.07	1	0	1	0	18	0	16	0	14	0	19	0
Chromatin structure-remodeling complex protein RSC8 OS=Saccharomyces cerevisiae (strain ATCC 204508 / S288c) OX=559292 GN=RSC8 PE=1 SV=1	P43609	RSC8	63 kDa		unknown	7285200	0	11123000	0	6443100	0	12526000	0	6212500	0	6926100	0	4133900	0	6099200	0	5861900	0	1	0.13	1	0	1	0	1	0	1	0	1	0	1	0	1	0.05	1	0	23	0	28	0	15	0	22	0
1,3-beta-glucanosyltransferase GAS1 OS=Saccharomyces cerevisiae (strain ATCC 204508 / S288c) OX=559292 GN=GAS1 PE=1 SV=2	P22146	GAS1	60 kDa		unknown	12588000	127490000	18540000	0	11556000	0	30871000	0	13128000	-1	39250000	0	16227000	0	16839000	-1	22649000	-1	1	0.81	1	0	1	0	1	0	1	0	1	0	1	0	1	0	1	0	16	1	18	0	14	0	22	0
Post-transcriptional regulator MKT1 OS=Saccharomyces cerevisiae (strain ATCC 204508 / S288c) OX=559292 GN=MKT1 PE=1 SV=2	P40850	MKT1	94 kDa		unknown	3086000	0	2638300	0	1352000	0	2916800	0	3505600	0	5698600	0	5698400	0	6548600	0	3740900	6064600	1	0.05	1	0	1	0	1	0	1	0	1	0	1	0	1	0	1	0.57	20	0	18	0	11	0	18	0
ATP-dependent rRNA helicase SPB4 OS=Saccharomyces cerevisiae (strain ATCC 204508 / S288c) OX=559292 GN=SPB4 PE=1 SV=1	P25808	SPB4	69 kDa		unknown	1169100	0	1095300	0	4779100	0	1084800	0	7598100	0	7523700	0	10818000	0	9316100	0	5126400	0	1	0	1	0	1	0	1	0	1	0	1	0	1	0	1	0	1	0	10	0	11	0	13	0	12	0
CCR4-Not complex 3'-5'-exoribonuclease subunit Ccr4 OS=Saccharomyces cerevisiae (strain ATCC 204508 / S288c) OX=559292 GN=CCR4 PE=1 SV=2	P31384	CCR4	95 kDa		unknown	3213800	0	4398700	0	3580800	0	11070000	0	9353300	0	10985000	0	10750000	0	13387000	0	8564500	0	1	0	1	0	1	0	1	0.45	1	0.22	1	0	1	0	1	0	1	0	12	0	13	0	17	0	21	0
Importin beta-like protein KAP120 OS=Saccharomyces cerevisiae (strain ATCC 204508 / S288c) OX=559292 GN=KAP120 PE=1 SV=1	Q02932	KAP120	120 kDa		unknown	3114700	0	3842400	0	5785500	0	5778900	0	5468600	0	7295300	0	5083400	0	9829500	0	6116200	0	1	0	1	0	1	0	1	0	1	0	1	0	1	0	1	0	1	0	16	0	14	0	17	0	13	0
Casein kinase II subunit alpha' OS=Saccharomyces cerevisiae (strain ATCC 204508 / S288c) OX=559292 GN=CKA2 PE=1 SV=2	P19454	CKA2	39 kDa		unknown	8049600	0	8920400	0	10967000	-1	12804000	0	20190000	0	26742000	-1	12581000	0	35814000	-1	17058000	0	1	0	1	0	1	0	1	0	1	0	1	0	1	0	1	0	1	0.49	17	0	14	0	15	0	20	0
Eukaryotic translation initiation factor 5 OS=Saccharomyces cerevisiae (strain ATCC 204508 / S288c) OX=559292 GN=TIF5 PE=1 SV=1	P38431	TIF5	45 kDa		unknown	9710400	0	8355200	0	6204500	0	13329000	0	22656000	0	20712000	0	12935000	0	11907000	0	14124000	0	1	0.22	1	0	1	0	1	0	1	0	1	0	1	0	1	0	1	0.09	22	0	18	0	14	0	16	0
Homocysteine/cysteine synthase OS=Saccharomyces cerevisiae (strain ATCC 204508 / S288c) OX=559292 GN=MET17 PE=1 SV=3	P06106	MET17	49 kDa		unknown	9845400	0	5564200	0	15957000	-1	14363000	0	23942000	-1	13519000	0	17581000	0	15947000	0	16020000	0	1	0	1	0	1	0	1	0	1	0	1	0	1	0	1	0	1	0	19	0	11	0	18	0	20	0
Signal recognition particle receptor subunit alpha homolog OS=Saccharomyces cerevisiae (strain ATCC 204508 / S288c) OX=559292 GN=SRP101 PE=1 SV=2	P32916	SRP101	69 kDa		unknown	4131000	0	4472000	0	6975100	0	9016000	0	9544500	0	7400400	0	7600000	0	15157000	0	6990700	0	1	0	1	0	1	0	1	0	1	0	1	0	1	0	1	0	1	0	13	0	12	0	13	0	16	0
Ribose-phosphate pyrophosphokinase 3 OS=Saccharomyces cerevisiae (strain ATCC 204508 / S288c) OX=559292 GN=PRS3 PE=1 SV=1	P38689	PRS3	35 kDa	TRUE	unknown	7573400	0	8008100	0	13050000	0	6878300	0	36543000	0	30859000	0	21501000	0	24216000	0	23424000	0	1	0	1	0	1	0	1	0	1	0	1	0.07	1	0	1	0.16	1	0	23	0	15	0	15	0	10	0
Protein BFR2 OS=Saccharomyces cerevisiae (strain ATCC 204508 / S288c) OX=559292 GN=BFR2 PE=1 SV=1	Q06631	BFR2	61 kDa		unknown	3156300	0	3343000	0	2847800	0	6403700	1055300000	6472500	497700000	7978800	0	5543100	0	5341700	0	2680600	0	1	0.83	1	0.26	1	0	1	0.96	1	0.43	1	0.06	1	0.21	1	0.12	1	0	15	0	16	0	12	0	15	2
Protein MAK16 OS=Saccharomyces cerevisiae (strain ATCC 204508 / S288c) OX=559292 GN=MAK16 PE=1 SV=2	P10962	MAK16	36 kDa		unknown	22828000	0	19954000	0	21808000	-1	24975000	0	37073000	-1	41728000	0	39755000	0	35684000	0	23116000	0	1	0	1	0	1	0	1	0	1	0	1	0	1	0	1	0	1	0	22	0	18	0	23	0	18	0
Vacuolar protein sorting-associated protein 1 OS=Saccharomyces cerevisiae (strain ATCC 204508 / S288c) OX=559292 GN=VPS1 PE=1 SV=2	P21576	VPS1	79 kDa	TRUE	unknown	1535200	0	2952000	0	1356600	0	2626100	0	6907100	-1	5326800	0	2496700	0	2449300	0	2897500	0	1	0.42	1	0	1	0	1	0.17	1	0	1	0	1	0	1	0	1	0	16	0	21	0	11	0	13	0
Vacuolar transporter chaperone 2 OS=Saccharomyces cerevisiae (strain ATCC 204508 / S288c) OX=559292 GN=VTC2 PE=1 SV=1	P43585	VTC2	95 kDa	TRUE	unknown	1344300	0	363710	0	1061500	0	67980000	0	3081700	0	3667000	0	4542700	0	2665500	0	3307600	0	1	0	1	0	1	0.41	1	0	1	0	1	0	1	0	1	0.12	1	0	14	0	3	0	9	0	38	0
Sphingosine-1-phosphate lyase OS=Saccharomyces cerevisiae (strain ATCC 204508 / S288c) OX=559292 GN=DPL1 PE=1 SV=1	Q05567	DPL1	66 kDa		unknown	2294500	0	2858900	-1	6930300	0	2977100	0	6444700	0	3319100	0	2298800	0	5269700	0	3609700	0	1	0	1	0	1	0	1	0	1	0	1	0.1	1	0	1	0	1	0	18	0	16	0	26	0	17	0
Ribosomal RNA small subunit methyltransferase NEP1 OS=Saccharomyces cerevisiae (strain ATCC 204508 / S288c) OX=559292 GN=EMG1 PE=1 SV=1	Q06287	EMG1	28 kDa		unknown	25970000	0	30085000	0	5963300	0	12512000	0	16632000	0	15553000	0	29402000	0	20579000	0	13662000	0	1	0	1	0	1	0	1	0	1	0	1	0	1	0	1	0	1	0	34	0	35	0	17	0	13	0
Calcium-transporting ATPase 1 OS=Saccharomyces cerevisiae (strain ATCC 204508 / S288c) OX=559292 GN=PMR1 PE=1 SV=1	P13586	PMR1	105 kDa		unknown	1121400	0	1915800	0	3030800	0	7999300	0	7117700	0	8211000	0	3365300	0	5919200	0	3369800	0	1	0	1	0	1	0	1	0	1	0	1	0	1	0	1	0	1	0	6	0	10	0	8	0	20	0
Probable mannosyltransferase KTR3 OS=Saccharomyces cerevisiae (strain ATCC 204508 / S288c) OX=559292 GN=KTR3 PE=1 SV=1	P38130	KTR3	47 kDa		unknown	7716500	0	7551300	0	6208200	0	17295000	0	16469000	0	12191000	0	14844000	0	24340000	0	9720400	0	1	0	1	0	1	0	1	0	1	0	1	0	1	0	1	0	1	0	14	0	12	0	15	0	19	0
Proteasome subunit alpha type-6 OS=Saccharomyces cerevisiae (strain ATCC 204508 / S288c) OX=559292 GN=PRE5 PE=1 SV=1	P40302	PRE5	26 kDa		unknown	41886000	0	38408000	0	64632000	-1	52455000	0	44739000	0	43192000	0	45876000	0	38876000	0	45696000	0	1	0	1	0	1	0	1	0	1	0	1	0	1	0	1	0	1	0.33	23	0	14	0	17	0	21	0
Nascent polypeptide-associated complex subunit beta-1 OS=Saccharomyces cerevisiae (strain ATCC 204508 / S288c) OX=559292 GN=EGD1 PE=1 SV=2	Q02642	EGD1	17 kDa		unknown	289980000	0	192180000	0	44869000	-1	70296000	-1	98011000	0	13873000	0	78833000	0	157210000	0	48264000	0	1	0	1	0	1	0	1	0	1	0	1	0	1	0	1	0	1	0	30	0	30	0	19	0	10	0
Ribosome biogenesis protein NSA2 OS=Saccharomyces cerevisiae (strain ATCC 204508 / S288c) OX=559292 GN=NSA2 PE=1 SV=1	P40078	NSA2	30 kDa		unknown	46127000	0	38468000	0	48797000	0	31281000	0	42773000	0	69974000	0	72221000	0	94779000	0	37245000	0	1	0.29	1	0.05	1	0.07	1	0.58	1	0.25	1	0	1	0	1	0.05	1	0.18	26	0	21	0	18	0	13	0
Nucleoporin SEH1 OS=Saccharomyces cerevisiae (strain ATCC 204508 / S288c) OX=559292 GN=SEH1 PE=1 SV=1	P53011	SEH1	39 kDa		unknown	18903000	0	18002000	-1	16213000	-1	18873000	-1	20925000	0	17502000	-1	13657000	0	22863000	-1	15372000	-1	1	0	1	0	1	0	1	0	1	0	1	0	1	0	1	0	1	0	29	0	24	0	18	0	20	0
Cluster of Homocitrate synthase, mitochondrial OS=Saccharomyces cerevisiae (strain ATCC 204508 / S288c) OX=559292 GN=LYS21 PE=1 SV=1 (Q12122)	Q12122 [2]	LYS21	49 kDa	TRUE	unknown	3360200	0	4815300	0	8380300	0	9584700	0	17421000	-1	8734600	-1	6879000	0	12552000	-1	8043900	0	1	0.18	1	0	1	0	1	0	1	0	1	0	1	0	1	0	1	0	16	0	15	0	19	0	18	0
Mitochondrial genome maintenance protein MGM101 OS=Saccharomyces cerevisiae (strain ATCC 204508 / S288c) OX=559292 GN=MGM101 PE=1 SV=1	P32787	MGM101	30 kDa		unknown	7987700	0	6897600	0	15210000	-1	14728000	0	18282000	0	14849000	0	13007000	0	11136000	0	14173000	0	1	0.06	1	0	1	0	1	0	1	0	1	0	1	0	1	0	1	0	21	0	19	0	21	0	16	0
ATP synthase subunit gamma, mitochondrial OS=Saccharomyces cerevisiae (strain ATCC 204508 / S288c) OX=559292 GN=ATP3 PE=1 SV=1	P38077	ATP3	34 kDa		unknown	16546000	0	15838000	0	19161000	0	27917000	0	25735000	0	26059000	0	18313000	0	8501600	0	23336000	24797000	1	0	1	0	1	0	1	0	1	0	1	0	1	0	1	0	1	0.59	21	0	19	0	21	0	21	0
Prohibitin-2 OS=Saccharomyces cerevisiae (strain ATCC 204508 / S288c) OX=559292 GN=PHB2 PE=1 SV=2	P50085	PHB2	34 kDa		unknown	17021000	0	31607000	0	15574000	0	83817000	39734000	27655000	0	31315000	0	12632000	0	13646000	0	14588000	0	1	0	1	0	1	0	1	1	1	0	1	0	1	0.16	1	0	1	0	17	0	20	0	14	0	30	2
54S ribosomal protein L35, mitochondrial OS=Saccharomyces cerevisiae (strain ATCC 204508 / S288c) OX=559292 GN=MRPL35 PE=1 SV=1	Q06678	MRPL35	43 kDa		unknown	6332500	0	7891600	0	14831000	0	17565000	-1	24437000	-1	14654000	0	15786000	0	18873000	0	14069000	0	1	0.06	1	0	1	0	1	0	1	0	1	0	1	0	1	0.08	1	0	15	0	12	0	15	0	18	0
1-acyl-sn-glycerol-3-phosphate acyltransferase OS=Saccharomyces cerevisiae (strain ATCC 204508 / S288c) OX=559292 GN=SLC1 PE=1 SV=1	P33333	SLC1	34 kDa		unknown	27398000	0	19267000	0	24151000	0	36340000	0	19081000	0	30576000	0	33102000	0	36150000	0	36007000	0	1	0.4	1	0	1	0	1	0	1	0	1	0	1	0	1	0	1	0	22	0	22	0	17	0	18	0
Nucleoporin POM152 OS=Saccharomyces cerevisiae (strain ATCC 204508 / S288c) OX=559292 GN=POM152 PE=1 SV=1	P39685	POM152	152 kDa		unknown	966440	0	684010	0	469310	0	7412700	0	260990	0	1083600	0	999600	0	1599800	0	807940	0	1	0	1	0	1	0	1	0	1	0	1	0	1	0	1	0	1	0	18	0	10	0	13	0	45	0
ATP-dependent RNA helicase ROK1 OS=Saccharomyces cerevisiae (strain ATCC 204508 / S288c) OX=559292 GN=ROK1 PE=1 SV=1	P45818	ROK1	64 kDa		unknown	4114800	0	5478800	0	1543900	0	1571300	0	8564200	0	6693800	0	9774000	0	9796300	0	4615800	0	1	0	1	0.06	1	0	1	0	1	0	1	0	1	0	1	0	1	0	21	0	23	0	8	0	9	0
Copper transport protein 86 OS=Saccharomyces cerevisiae (strain ATCC 204508 / S288c) OX=559292 GN=CTR86 PE=1 SV=1	P25355	CTR86	65 kDa		unknown	2757400	0	2984100	0	4935600	0	5426000	0	5886600	0	6291000	0	4026300	0	6389900	0	5191000	0	1	0	1	0	1	0	1	0.2	1	0	1	0	1	0	1	0	1	0	21	0	19	0	22	0	23	0
Protein disulfide-isomerase OS=Saccharomyces cerevisiae (strain ATCC 204508 / S288c) OX=559292 GN=PDI1 PE=1 SV=2	P17967	PDI1	58 kDa		unknown	11395000	0	6713700	0	15254000	0	8607900	0	9148700	0	5301800	0	6691000	0	5404900	0	2864500	0	1	0.05	1	0	1	0	1	0	1	0	1	0	1	0	1	0.11	1	0.12	23	0	20	0	27	0	14	0
26S proteasome regulatory subunit RPN8 OS=Saccharomyces cerevisiae (strain ATCC 204508 / S288c) OX=559292 GN=RPN8 PE=1 SV=3	Q08723	RPN8	38 kDa		unknown	6661000	0	10570000	0	8075900	0	8679000	0	30583000	0	22297000	0	8764600	0	11075000	0	10515000	0	1	0.08	1	0	1	0	1	0	1	0	1	0	1	0	1	0	1	0	15	0	17	0	14	0	11	0
RNA polymerase II degradation factor 1 OS=Saccharomyces cerevisiae (strain ATCC 204508 / S288c) OX=559292 GN=DEF1 PE=1 SV=1	P35732	DEF1	84 kDa		unknown	27948000	0	27282000	0	17126000	0	22178000	0	6201900	-1	10385000	0	22205000	0	11542000	0	25968000	0	1	0	1	0	1	0	1	0	1	0	1	0	1	0	1	0	1	0	27	0	19	0	15	0	11	0
ATP-dependent RNA helicase DBP8 OS=Saccharomyces cerevisiae (strain ATCC 204508 / S288c) OX=559292 GN=DBP8 PE=1 SV=1	P38719	DBP8	48 kDa		unknown	9093200	0	13675000	0	8581500	0	7544400	0	14041000	0	6338600	0	12463000	0	23802000	0	11239000	0	1	0.06	1	0	1	0	1	0	1	0	1	0	1	0.9	1	0	1	0	23	0	21	0	14	0	11	0
Probable alpha-1,6-mannosyltransferase MNN11 OS=Saccharomyces cerevisiae (strain ATCC 204508 / S288c) OX=559292 GN=MNN11 PE=1 SV=2	P46985	MNN11	48 kDa		unknown	1606200	0	9298300	-1	5243700	0	44026000	0	11295000	0	12495000	0	5120600	0	15647000	0	8366900	0	1	0	1	0	1	0	1	0	1	0	1	0.27	1	0	1	0	1	0	4	0	14	0	12	0	29	0
Nucleolar protein 16 OS=Saccharomyces cerevisiae (strain ATCC 204508 / S288c) OX=559292 GN=NOP16 PE=1 SV=1	P40007	NOP16	27 kDa		unknown	35661000	0	36205000	0	32986000	0	50504000	-1	34054000	0	16812000	-1	26813000	-1	28707000	0	56600000	-1	1	0	1	0	1	0	1	0	1	0	1	0	1	0	1	0	1	0	29	0	25	0	17	0	16	0
37S ribosomal protein S35, mitochondrial OS=Saccharomyces cerevisiae (strain ATCC 204508 / S288c) OX=559292 GN=MRPS35 PE=1 SV=1	P53292	MRPS35	40 kDa		unknown	9304000	0	8670800	0	14619000	0	16031000	0	20905000	0	12020000	0	18303000	0	21924000	0	11338000	0	1	0.13	1	0	1	0	1	0	1	0	1	0	1	0	1	0	1	0	14	0	14	0	15	0	18	0
TATA-box-binding protein OS=Saccharomyces cerevisiae (strain ATCC 204508 / S288c) OX=559292 GN=SPT15 PE=1 SV=3	P13393	SPT15	27 kDa		unknown	12454000	0	21079000	0	25246000	0	28079000	0	24815000	0	36821000	0	23191000	0	29505000	0	31023000	0	1	0	1	0	1	0	1	0	1	0.06	1	0	1	0	1	0	1	0	17	0	21	0	16	0	15	0
37S ribosomal protein MRP4, mitochondrial OS=Saccharomyces cerevisiae (strain ATCC 204508 / S288c) OX=559292 GN=MRP4 PE=1 SV=1	P32902	MRP4	44 kDa		unknown	6393600	0	8554200	0	12228000	0	10701000	-1	14289000	-1	8571300	0	13666000	0	9984100	0	7436800	-1	1	0	1	0	1	0	1	0	1	0	1	0.17	1	0	1	0	1	0	19	0	17	0	17	0	13	0
ERAD-associated E3 ubiquitin-protein ligase DOA10 OS=Saccharomyces cerevisiae (strain ATCC 204508 / S288c) OX=559292 GN=SSM4 PE=1 SV=1	P40318	SSM4	151 kDa		unknown	1369700	0	6537200	0	3256600	0	3608700	0	2831600	0	3878200	0	2570400	0	8818500	-1	5390900	0	1	0.05	1	0	1	0	1	0	1	0	1	0	1	0	1	0	1	0	16	0	13	0	15	0	16	0
60S ribosome subunit biogenesis protein NIP7 OS=Saccharomyces cerevisiae (strain ATCC 204508 / S288c) OX=559292 GN=NIP7 PE=1 SV=1	Q08962	NIP7	20 kDa		unknown	32891000	0	45523000	0	28044000	0	22586000	-1	55671000	0	38302000	0	35043000	-1	40706000	0	38219000	0	1	0.46	1	0	1	0	1	0	1	0	1	0	1	0	1	0	1	0	26	0	23	0	19	0	12	0
Cytochrome b-c1 complex subunit Rieske, mitochondrial OS=Saccharomyces cerevisiae (strain ATCC 204508 / S288c) OX=559292 GN=RIP1 PE=1 SV=1	P08067	RIP1	23 kDa		unknown	35969000	0	44966000	0	53872000	0	283370000	0	59636000	0	50820000	0	43132000	-1	32084000	0	33513000	-1	1	0	1	0	1	0	1	0	1	0	1	0	1	0	1	0	1	0	16	0	14	0	13	0	34	0
54S ribosomal protein L24, mitochondrial OS=Saccharomyces cerevisiae (strain ATCC 204508 / S288c) OX=559292 GN=MRPL24 PE=1 SV=2	P36525	MRPL24	30 kDa		unknown	7771000	0	8778800	-1	13227000	0	13102000	0	22929000	0	15834000	0	17658000	-1	18528000	0	11633000	0	1	0	1	0	1	0	1	0	1	0	1	0	1	0	1	0.08	1	0	16	0	18	0	13	0	15	0
Sec sixty-one protein homolog OS=Saccharomyces cerevisiae (strain ATCC 204508 / S288c) OX=559292 GN=SSH1 PE=1 SV=1	P38353	SSH1	53 kDa		unknown	40780000	0	42225000	1248900	35944000	0	59126000	-1	46800000	0	49335000	32546000	44807000	33879000	76787000	18767000	38337000	0	1	0	1	0.8	1	0.65	1	0	1	0.32	1	0.96	1	1	1	0.88	1	0.81	22	0	16	1	12	1	16	0
Cluster of Histone H2B.2 OS=Saccharomyces cerevisiae (strain ATCC 204508 / S288c) OX=559292 GN=HTB2 PE=1 SV=2 (P02294)	P02294 [2]	HTB2	14 kDa	TRUE	unknown	93592000	0	108670000	0	106450000	-1	164250000	0	22142000	0	54281000	0	88161000	0	99314000	0	96658000	0	1	0.99	1	0	1	0	1	0	1	0.91	1	0.46	1	0.75	1	0.97	1	0.31	19	6	16	0	16	0	13	0
26S proteasome regulatory subunit RPN5 OS=Saccharomyces cerevisiae (strain ATCC 204508 / S288c) OX=559292 GN=RPN5 PE=1 SV=3	Q12250	RPN5	52 kDa		unknown	2844500	0	10029000	0	7973900	0	2697400	0	18021000	0	12603000	0	7312700	0	5846700	0	4146100	0	1	0.05	1	0	1	0	1	0	1	0	1	0	1	0	1	0	1	0	8	0	12	0	8	0	11	0
U3 small nucleolar RNA-associated protein 18 OS=Saccharomyces cerevisiae (strain ATCC 204508 / S288c) OX=559292 GN=UTP18 PE=1 SV=1	P40362	UTP18	66 kDa		unknown	17277000	0	13108000	0	13291000	0	21843000	0	20928000	0	23325000	0	29866000	0	5424300	0	16157000	-1	1	0	1	0	1	0	1	0	1	0	1	0	1	0	1	0	1	0	18	0	20	0	20	0	22	0
Sulfite reductase [NADPH] subunit beta OS=Saccharomyces cerevisiae (strain ATCC 204508 / S288c) OX=559292 GN=MET5 PE=1 SV=1	P47169	MET5	161 kDa	TRUE	unknown	1061600	0	1954600	0	2621300	0	2513200	0	4030900	0	4057600	0	2298900	0	2724600	0	1941300	0	1	0	1	0	1	0	1	0	1	0	1	0	1	0.25	1	0	1	0.73	9	0	11	0	12	0	10	0
UBP3-associated protein BRE5 OS=Saccharomyces cerevisiae (strain ATCC 204508 / S288c) OX=559292 GN=BRE5 PE=1 SV=1	P53741	BRE5	58 kDa		unknown	7364400	0	10913000	0	4597200	0	5190500	0	5955700	0	10047000	0	4261200	0	2969500	0	8301700	0	1	0	1	0	1	0	1	0	1	0	1	0	1	0	1	0	1	0	24	0	26	0	15	0	12	0
26S proteasome regulatory subunit RPN9 OS=Saccharomyces cerevisiae (strain ATCC 204508 / S288c) OX=559292 GN=RPN9 PE=1 SV=1	Q04062	RPN9	46 kDa		unknown	5259800	0	8910200	0	8621300	0	5449100	0	19459000	0	12608000	0	4233600	0	9141500	0	11106000	0	1	0.37	1	0	1	0.25	1	0	1	0.07	1	0	1	0	1	0.09	1	0.09	16	0	20	0	18	0	11	0
Eukaryotic translation initiation factor 4E OS=Saccharomyces cerevisiae (strain ATCC 204508 / S288c) OX=559292 GN=CDC33 PE=1 SV=1	P07260	CDC33	24 kDa		unknown	52429000	0	52485000	-1	42839000	0	43357000	0	41623000	-1	26768000	0	29803000	-1	58596000	-1	49855000	0	1	0	1	0	1	0	1	0	1	0	1	0	1	0	1	0	1	0.45	21	0	24	0	16	0	17	0
Replication factor C subunit 1 OS=Saccharomyces cerevisiae (strain ATCC 204508 / S288c) OX=559292 GN=RFC1 PE=1 SV=1	P38630	RFC1	95 kDa		unknown	3024000	0	2422400	0	1162000	0	2175900	0	2431400	0	3841000	0	1974200	0	3604800	0	3965500	0	1	0	1	0	1	0	1	0.05	1	0	1	0.19	1	0	1	0	1	0	18	0	16	0	10	0	15	0
GPI transamidase component GPI16 OS=Saccharomyces cerevisiae (strain ATCC 204508 / S288c) OX=559292 GN=GPI16 PE=1 SV=2	P38875	GPI16	69 kDa		unknown	5097900	0	10874000	0	2968300	0	17446000	0	11150000	0	11143000	0	6062200	0	14063000	0	9985400	0	1	0	1	0	1	0	1	0	1	0	1	0	1	0	1	0	1	0	17	0	19	0	8	0	19	0
Proteasome subunit alpha type-3 OS=Saccharomyces cerevisiae (strain ATCC 204508 / S288c) OX=559292 GN=PRE9 PE=1 SV=1	P23638	PRE9	29 kDa		unknown	32509000	0	26977000	0	25495000	0	36383000	-1	20537000	-1	29809000	0	35289000	0	32533000	31773000	22308000	22358000	1	0	1	0	1	0	1	0	1	0	1	0	1	0	1	0.77	1	0.55	18	0	21	0	18	0	18	0
Very-long-chain enoyl-CoA reductase OS=Saccharomyces cerevisiae (strain ATCC 204508 / S288c) OX=559292 GN=TSC13 PE=1 SV=1	Q99190	TSC13	37 kDa		unknown	16018000	0	21818000	0	25610000	-1	29672000	-1	18518000	0	25035000	0	22930000	0	47219000	-1	29763000	-1	1	0.13	1	0	1	0	1	0	1	0	1	0	1	0	1	0	1	0	17	0	14	0	11	0	20	0
Alpha-1,3/1,6-mannosyltransferase ALG2 OS=Saccharomyces cerevisiae (strain ATCC 204508 / S288c) OX=559292 GN=ALG2 PE=1 SV=2	P43636	ALG2	58 kDa		unknown	8966100	0	8361400	0	8090600	0	8076400	0	17498000	-1	11895000	0	8822100	0	14310000	0	10402000	0	1	0	1	0	1	0	1	0	1	0	1	0	1	0	1	0	1	0	14	0	15	0	10	0	13	0
RNA 3'-terminal phosphate cyclase-like protein OS=Saccharomyces cerevisiae (strain ATCC 204508 / S288c) OX=559292 GN=RCL1 PE=1 SV=1	Q08096	RCL1	40 kDa		unknown	17267000	0	17052000	0	7084500	0	16405000	0	12262000	0	15378000	0	21694000	0	23728000	0	17657000	0	1	0.08	1	0	1	0	1	0.06	1	0	1	0	1	0.06	1	0	1	0	17	0	14	0	8	0	14	0
60S acidic ribosomal protein P2-alpha OS=Saccharomyces cerevisiae (strain ATCC 204508 / S288c) OX=559292 GN=RPP2A PE=1 SV=1	P05319	RPP2A	11 kDa	TRUE	unknown	282290000	0	288040000	-1	297470000	0	235120000	-1	68397000	0	85733000	-1	336260000	136180000	182240000	0	473860000	73777000	1	0	1	0	1	0	1	0	1	0	1	0	1	1	1	0	1	0.98	18	0	15	0	29	0	19	0
Elongation factor 1-gamma 1 OS=Saccharomyces cerevisiae (strain ATCC 204508 / S288c) OX=559292 GN=CAM1 PE=1 SV=2	P29547	CAM1	47 kDa	TRUE	unknown	39963000	14257000	46623000	0	45218000	42601000	49066000	12273000	59002000	5445500	40529000	38652000	64142000	33656000	82385000	25202000	66275000	0	1	0.12	1	0	1	0.14	1	0.06	1	0.07	1	0.28	1	0.29	1	0.31	1	0	15	1	15	0	13	3	13	1
DNA-directed RNA polymerase III subunit RPC3 OS=Saccharomyces cerevisiae (strain ATCC 204508 / S288c) OX=559292 GN=RPC82 PE=1 SV=2	P32349	RPC82	74 kDa		unknown	697740	0	1688400	0	5269300	0	7369200	0	8463200	0	8280800	0	2396700	0	3418800	0	5157500	0	1	0.18	1	0	1	0	1	0.05	1	0.08	1	0	1	0	1	0	1	0	5	0	12	0	13	0	21	0
Replication factor C subunit 5 OS=Saccharomyces cerevisiae (strain ATCC 204508 / S288c) OX=559292 GN=RFC5 PE=1 SV=1	P38251	RFC5	40 kDa		unknown	12423000	0	13145000	0	4507400	0	9602600	0	7656100	0	15736000	0	14921000	0	24828000	0	12487000	0	1	0.15	1	0	1	0	1	0	1	0	1	0	1	0	1	0	1	0	29	0	18	0	9	0	10	0
Replication factor C subunit 3 OS=Saccharomyces cerevisiae (strain ATCC 204508 / S288c) OX=559292 GN=RFC3 PE=1 SV=1	P38629	RFC3	38 kDa		unknown	7725700	0	7105000	0	6581300	0	6528000	0	3731300	0	9975500	0	9175800	0	16525000	0	12784000	0	1	0	1	0	1	0	1	0.34	1	0	1	0	1	0	1	0	1	0.09	22	0	17	0	9	0	16	0
V-type proton ATPase subunit H OS=Saccharomyces cerevisiae (strain ATCC 204508 / S288c) OX=559292 GN=VMA13 PE=1 SV=1	P41807	VMA13	54 kDa		unknown	1826800	0	5014900	-1	6282800	-1	9197300	0	2050600	0	2136200	0	8721600	0	6789500	0	4055700	0	1	0	1	0	1	0	1	0	1	0	1	0	1	0	1	0	1	0	15	0	22	0	20	0	21	0
Nucleolar complex protein 14 OS=Saccharomyces cerevisiae (strain ATCC 204508 / S288c) OX=559292 GN=NOP14 PE=1 SV=1	Q99207	NOP14	94 kDa		unknown	3515800	0	4436600	0	2660000	0	3258300	0	2526000	0	4394500	0	3743100	0	3528800	0	4281100	0	1	0.07	1	0.11	1	0.38	1	0	1	0	1	0.23	1	0	1	0.09	1	0.06	20	0	23	0	14	0	16	0
Dolichyl-diphosphooligosaccharide--protein glycosyltransferase subunit STT3 OS=Saccharomyces cerevisiae (strain ATCC 204508 / S288c) OX=559292 GN=STT3 PE=1 SV=2	P39007	STT3	82 kDa		unknown	1715600	0	3167200	0	5785900	0	18378000	-1	10322000	-1	11707000	0	6529900	616010	10852000	0	6559700	-1	1	0	1	0	1	0	1	0	1	0	1	0.13	1	0.85	1	0	1	0	8	0	11	0	13	0	20	0
mRNA-binding protein PUF3 OS=Saccharomyces cerevisiae (strain ATCC 204508 / S288c) OX=559292 GN=PUF3 PE=1 SV=1	Q07807	PUF3	98 kDa		unknown	143350	0	2635500	0	2035700	0	4722900	0	10215000	0	7200100	0	7119000	0	8146200	0	5963400	0	1	0	1	0	1	0	1	0.06	1	0	1	0	1	0.07	1	0	1	0	5	0	14	0	12	0	15	0
40S ribosomal protein S30-B OS=Saccharomyces cerevisiae (strain ATCC 204508 / S288c) OX=559292 GN=RPS30B PE=1 SV=1	P0CX34	RPS30B	7 kDa		unknown	516530000	0	471100000	0	298910000	-1	529710000	0	462820000	202160000	817670000	60069000	880710000	469120000	205170000	415230000	776310000	288210000	1	0.1	1	0	1	0	1	0	1	1	1	0.96	1	1	0.97	1	1	0.98	23	0	23	0	19	0	9	0
Protein SIS1 OS=Saccharomyces cerevisiae (strain ATCC 204508 / S288c) OX=559292 GN=SIS1 PE=1 SV=1	P25294	SIS1	38 kDa		unknown	13539000	0	17948000	0	19331000	0	20077000	0	17649000	-1	15178000	-1	26513000	0	722460	-1	12156000	-1	1	0	1	0	1	0	1	0	1	0	1	0	1	0	1	0	1	0	18	0	23	0	19	0	16	0
Proteasome subunit alpha type-5 OS=Saccharomyces cerevisiae (strain ATCC 204508 / S288c) OX=559292 GN=PUP2 PE=1 SV=2	P32379	PUP2	29 kDa		unknown	24566000	0	21398000	0	24332000	-1	34455000	0	29969000	0	34947000	0	32845000	-1	46307000	0	31305000	0	1	0	1	0	1	0	1	0.06	1	0.1	1	0	1	0	1	0	1	0	17	0	16	0	16	0	22	0
Oxysterol-binding protein homolog 3 OS=Saccharomyces cerevisiae (strain ATCC 204508 / S288c) OX=559292 GN=OSH3 PE=1 SV=1	P38713	OSH3	114 kDa		unknown	883880	0	718370	0	670460	0	2441100	0	1111000	0	3067400	0	1518500	0	1406100	0	1102000	0	1	0	1	0	1	0	1	0.08	1	0	1	0	1	0	1	0	1	0	17	0	17	0	9	0	23	0
Transcription initiation factor TFIID subunit 6 OS=Saccharomyces cerevisiae (strain ATCC 204508 / S288c) OX=559292 GN=TAF6 PE=1 SV=1	P53040	TAF6	58 kDa		unknown	4506700	0	5190500	0	2707600	0	5389400	0	3440700	-1	5057100	0	5503200	0	3125800	-1	5097800	0	1	0	1	0	1	0	1	0	1	0	1	0	1	0	1	0	1	0	20	0	20	0	9	0	16	0
Ubiquitin fusion degradation protein 4 OS=Saccharomyces cerevisiae (strain ATCC 204508 / S288c) OX=559292 GN=UFD4 PE=1 SV=1	P33202	UFD4	168 kDa		unknown	334580	0	348970	0	1031100	0	976100	24826000	2078000	0	1912500	0	441630	0	1552800	0	1882000	0	1	0.69	1	0.91	1	0	1	0.83	1	0	1	0	1	0	1	0	1	0	6	0	5	0	17	0	12	1
Bud emergence protein 4 OS=Saccharomyces cerevisiae (strain ATCC 204508 / S288c) OX=559292 GN=BEM4 PE=1 SV=1	P39011	BEM4	71 kDa		unknown	2212400	0	1374600	0	3054900	0	3722800	0	2264900	0	2706500	0	2251700	0	5224600	0	2609800	0	1	0.36	1	0	1	0	1	0	1	0	1	0	1	0	1	0	1	0	21	0	11	0	16	0	17	0
Mitochondrial 2-oxodicarboxylate carrier 2 OS=Saccharomyces cerevisiae (strain ATCC 204508 / S288c) OX=559292 GN=ODC2 PE=1 SV=1	Q99297	ODC2	34 kDa		unknown	16343000	0	17004000	0	27332000	0	41888000	0	38815000	0	33412000	0	28589000	3549100	47149000	0	40576000	0	1	0	1	0	1	0	1	0	1	0	1	0	1	1	1	0	1	0	14	0	12	0	14	0	15	0
Probable tubulin--tyrosine ligase PBY1 OS=Saccharomyces cerevisiae (strain ATCC 204508 / S288c) OX=559292 GN=PBY1 PE=1 SV=2	P38254	PBY1	86 kDa		unknown	2554400	0	1686300	0	3764800	0	3881600	0	3355900	0	3683800	0	3042900	0	6106500	0	3772000	0	1	0	1	0.18	1	0	1	0	1	0	1	0	1	0	1	0	1	0	19	0	13	0	13	0	15	0
AP-1 accessory protein LAA1 OS=Saccharomyces cerevisiae (strain ATCC 204508 / S288c) OX=559292 GN=LAA1 PE=1 SV=1	P39526	LAA1	230 kDa		unknown	132020	0	319790	0	683730	0	546190	0	1043900	0	935830	0	1037500	0	2295700	0	964150	0	1	0.32	1	0.07	1	0	1	0.18	1	0	1	0	1	0	1	0	1	0	9	0	6	0	12	0	6	0
DNA polymerase alpha catalytic subunit A OS=Saccharomyces cerevisiae (strain ATCC 204508 / S288c) OX=559292 GN=POL1 PE=1 SV=2	P13382	POL1	167 kDa		unknown	919790	0	679940	0	1219700	0	984090	0	1657500	0	1189800	0	399540	0	2344700	0	1344500	0	1	0	1	0	1	0	1	0	1	0	1	0	1	0	1	0	1	0	18	0	12	0	18	0	15	0
Myosin-4 OS=Saccharomyces cerevisiae (strain ATCC 204508 / S288c) OX=559292 GN=MYO4 PE=1 SV=1	P32492	MYO4	169 kDa	TRUE	unknown	934380	0	1239300	0	1100500	0	1755100	0	2580400	0	2485500	0	1180200	0	3083200	0	956170	0	1	0.26	1	0	1	0.07	1	0	1	0	1	0	1	0.11	1	0	1	0.05	15	0	15	0	11	0	12	0
Pumilio homology domain family member 4 OS=Saccharomyces cerevisiae (strain ATCC 204508 / S288c) OX=559292 GN=PUF4 PE=1 SV=2	P25339	PUF4	98 kDa		unknown	6692000	0	6210000	0	4076500	-1	7287600	0	10150000	0	8657300	0	6650800	0	11086000	0	10912000	0	1	0	1	0	1	0	1	0	1	0	1	0.1	1	0	1	0	1	0	15	0	14	0	5	0	13	0
Elongation factor 1-beta OS=Saccharomyces cerevisiae (strain ATCC 204508 / S288c) OX=559292 GN=EFB1 PE=1 SV=4	P32471	EFB1	23 kDa		unknown	124260000	0	106050000	0	59892000	0	68883000	0	33975000	-1	38343000	0	44674000	0	91539000	0	49845000	0	1	0	1	0	1	0	1	0	1	0	1	0	1	0	1	0	1	0	32	0	27	0	15	0	16	0
Vesicle-associated membrane protein-associated protein SCS2 OS=Saccharomyces cerevisiae (strain ATCC 204508 / S288c) OX=559292 GN=SCS2 PE=1 SV=3	P40075	SCS2	27 kDa		unknown	56242000	0	51359000	-1	55961000	0	71577000	0	49539000	-1	34616000	0	49035000	0	70321000	0	45598000	0	1	0.37	1	0	1	0	1	0.26	1	0	1	0	1	0	1	0	1	0	24	0	21	0	20	0	16	0
5-aminolevulinate synthase, mitochondrial OS=Saccharomyces cerevisiae (strain ATCC 204508 / S288c) OX=559292 GN=HEM1 PE=1 SV=1	P09950	HEM1	59 kDa		unknown	8712100	22482000	4569900	22362000	3128400	0	2716500	691370000	8627900	0	2803000	6954900	6089300	0	9572800	-1	3469500	0	1	0.99	1	0.8	1	0	1	0.96	1	0	1	0.88	1	0.51	1	0	1	0	22	1	11	1	12	0	8	2
KRR1 small subunit processome component OS=Saccharomyces cerevisiae (strain ATCC 204508 / S288c) OX=559292 GN=KRR1 PE=1 SV=1	P25586	KRR1	37 kDa		unknown	4399900	0	13164000	0	3888100	0	5670800	0	8850000	0	8002700	4890600	12809000	0	11192000	46754000	16311000	0	1	0.13	1	0	1	0	1	0.89	1	0.18	1	0.94	1	0	1	0.46	1	0	13	0	16	0	10	0	8	1
Alanine/arginine aminopeptidase OS=Saccharomyces cerevisiae (strain ATCC 204508 / S288c) OX=559292 GN=AAP1 PE=1 SV=2	P37898	AAP1	98 kDa	TRUE	unknown	460440	0	1053900	-1	904150	0	641960	0	11863000	0	16475000	0	1950200	0	783190	0	1776300	0	1	0	1	0	1	0	1	0	1	0	1	0	1	0	1	0	1	0	10	0	11	0	9	0	7	0
Enhancer of mRNA-decapping protein 3 OS=Saccharomyces cerevisiae (strain ATCC 204508 / S288c) OX=559292 GN=EDC3 PE=1 SV=1	P39998	EDC3	61 kDa		unknown	7187000	0	8341500	0	5579100	0	9828000	0	8408600	0	10987000	1692000	10615000	5183100	13478000	0	9672700	0	1	0.17	1	0	1	0	1	0	1	0	1	0.78	1	0.99	1	0.15	1	0	13	0	16	0	12	0	16	0
Structural maintenance of chromosomes protein 3 OS=Saccharomyces cerevisiae (strain ATCC 204508 / S288c) OX=559292 GN=SMC3 PE=1 SV=1	P47037	SMC3	141 kDa		unknown	949690	18239000	1227500	0	1143700	0	1253100	2747700	669520	0	2234500	0	1946500	0	3954200	0	1067700	0	1	0.79	1	0.33	1	0	1	0.58	1	0.06	1	0	1	0	1	0	1	0.07	14	1	14	0	13	0	8	1
Carrier protein YMC2, mitochondrial OS=Saccharomyces cerevisiae (strain ATCC 204508 / S288c) OX=559292 GN=YMC2 PE=1 SV=1	P38087	YMC2	37 kDa		unknown	3950800	0	4891900	0	5397800	0	7273200	0	11979000	0	16276000	0	5535500	0	9518200	0	11550000	-1	1	0	1	0	1	0	1	0	1	0	1	0	1	0	1	0	1	0	15	0	13	0	16	0	12	0
ATP-dependent permease PDR12 OS=Saccharomyces cerevisiae (strain ATCC 204508 / S288c) OX=559292 GN=PDR12 PE=1 SV=1	Q02785	PDR12	171 kDa	TRUE	unknown	2492500	0	1696700	0	1179900	0	353710	0	1068500	0	4043400	0	454920	0	1850300	0	2143100	0	1	0	1	0	1	0	1	0	1	0	1	0	1	0	1	0	1	0	23	0	15	0	13	0	6	0
Cluster of Succinate dehydrogenase [ubiquinone] flavoprotein subunit, mitochondrial OS=Saccharomyces cerevisiae (strain ATCC 204508 / S288c) OX=559292 GN=SDH1 PE=1 SV=1 (Q00711)	Q00711 [2]	SDH1	70 kDa	TRUE	unknown	7683300	0	6961800	0	5142900	0	8552600	0	12178000	0	5665000	0	6587600	0	6896000	0	5567800	0	1	0.07	1	0	1	0	1	0	1	0.06	1	0.34	1	0	1	0	1	0.06	24	0	13	0	9	0	12	0
Cluster of Peroxiredoxin TSA1 OS=Saccharomyces cerevisiae (strain ATCC 204508 / S288c) OX=559292 GN=TSA1 PE=1 SV=3 (P34760)	P34760 [2]	TSA1	22 kDa	TRUE	unknown	46948000	-1	43098000	-1	37161000	-1	43417000	-1	37791000	-1	34407000	-1	51712000	-1	60431000	0	37296000	0	1	0	1	0	1	0	1	0	1	0	1	0	1	0	1	0	1	0	17	0	18	0	14	0	13	0
Homoserine kinase OS=Saccharomyces cerevisiae (strain ATCC 204508 / S288c) OX=559292 GN=THR1 PE=1 SV=4	P17423	THR1	39 kDa		unknown	12573000	-1	18478000	-1	25398000	-1	12520000	-1	35984000	0	32230000	0	11720000	0	17175000	0	20441000	0	1	0	1	0	1	0	1	0	1	0	1	0	1	0	1	0	1	0	16	0	17	0	19	0	10	0
Signal recognition particle subunit SRP54 OS=Saccharomyces cerevisiae (strain ATCC 204508 / S288c) OX=559292 GN=SRP54 PE=1 SV=2	P20424	SRP54	60 kDa		unknown	4737600	0	6679700	0	9721400	0	9489800	0	13093000	0	19172000	0	15769000	1599400	21162000	0	14238000	0	1	0	1	0	1	0	1	0	1	0.08	1	0	1	0.55	1	0	1	0	9	0	11	0	14	0	13	0
Exocyst complex component SEC10 OS=Saccharomyces cerevisiae (strain ATCC 204508 / S288c) OX=559292 GN=SEC10 PE=1 SV=1	Q06245	SEC10	100 kDa		unknown	580860	0	1131700	0	956920	0	1055500	0	1571600	0	2700000	0	423350	0	1577200	0	2039400	0	1	0	1	0.08	1	0.19	1	0	1	0	1	0	1	0.07	1	0	1	0	14	0	12	0	11	0	11	0
Cytochrome c oxidase subunit 2 OS=Saccharomyces cerevisiae (strain ATCC 204508 / S288c) OX=559292 GN=COX2 PE=1 SV=1	P00410	COX2	29 kDa		unknown	12980000	-1	27802000	-1	49930000	0	220580000	0	80846000	0	49080000	0	37441000	0	25703000	-1	53821000	0	1	0	1	0	1	0	1	0	1	0	1	0	1	0	1	0	1	0	13	0	16	0	15	0	22	0
54S ribosomal protein L2, mitochondrial OS=Saccharomyces cerevisiae (strain ATCC 204508 / S288c) OX=559292 GN=MRP7 PE=1 SV=1	P12687	MRP7	43 kDa		unknown	3447800	0	9233000	0	12271000	0	9616900	0	23005000	0	10679000	0	11938000	0	13626000	0	5935300	0	1	0	1	0.07	1	0.09	1	0	1	0	1	0	1	0	1	0.11	1	0	9	0	14	0	14	0	13	0
Protein SLY1 OS=Saccharomyces cerevisiae (strain ATCC 204508 / S288c) OX=559292 GN=SLY1 PE=1 SV=1	P22213	SLY1	75 kDa		unknown	3725800	0	5292800	0	2997500	0	5094300	0	4572600	0	4294600	0	3537300	0	4095100	0	3674600	0	1	0.16	1	0.06	1	0	1	0	1	0	1	0	1	0	1	0	1	0.16	21	0	19	0	14	0	17	0
5-oxoprolinase OS=Saccharomyces cerevisiae (strain ATCC 204508 / S288c) OX=559292 GN=OXP1 PE=1 SV=2	P28273	OXP1	140 kDa		unknown	14871000	0	345060	0	335590	0	1601500	0	1891300	0	2543000	0	941670	0	2776500	0	1551100	0	1	0	1	0	1	0.13	1	0.34	1	0.08	1	0	1	0	1	0	1	0.63	9	0	7	0	8	0	17	0
60S ribosomal subunit assembly/export protein LOC1 OS=Saccharomyces cerevisiae (strain ATCC 204508 / S288c) OX=559292 GN=LOC1 PE=1 SV=1	P43586	LOC1	24 kDa		unknown	71919000	0	85007000	0	67908000	0	61908000	0	80958000	0	80243000	0	106510000	0	60663000	0	54724000	0	1	0	1	0	1	0	1	0	1	0	1	0	1	0	1	0	1	0	17	0	20	0	12	0	16	0
Reticulon-like protein 1 OS=Saccharomyces cerevisiae (strain ATCC 204508 / S288c) OX=559292 GN=RTN1 PE=1 SV=1	Q04947	RTN1	33 kDa		unknown	22291000	0	33797000	0	17566000	0	13041000	0	21415000	0	23768000	0	15798000	-1	21803000	0	22137000	0	1	0	1	0	1	0	1	0	1	0	1	0	1	0	1	0	1	0.11	22	0	25	0	14	0	13	0
Conserved oligomeric Golgi complex subunit 4 OS=Saccharomyces cerevisiae (strain ATCC 204508 / S288c) OX=559292 GN=COG4 PE=1 SV=1	Q06096	COG4	99 kDa		unknown	347500	0	326310	0	1238100	0	1341100	103200000	1830700	0	2271500	0	28108000	0	2467700	0	2715000	0	1	0.08	1	0	1	0	1	0.84	1	0	1	0	1	0.27	1	0	1	0	5	0	3	0	8	0	10	1
3-hydroxy-3-methylglutaryl-coenzyme A reductase 2 OS=Saccharomyces cerevisiae (strain ATCC 204508 / S288c) OX=559292 GN=HMG2 PE=1 SV=1	P12684	HMG2	116 kDa	TRUE	unknown	4821800	243730000	6064100	0	8099100	0	9832900	0	7365900	0	10035000	0	8481300	4357300	9946400	0	7304900	0	1	0.69	1	0.27	1	0	1	0	1	0	1	0	1	0.29	1	0	1	0	8	1	9	0	13	0	17	0
Lipoyl synthase, mitochondrial OS=Saccharomyces cerevisiae (strain ATCC 204508 / S288c) OX=559292 GN=LIP5 PE=1 SV=1	P32875	LIP5	46 kDa		unknown	5032100	0	3757900	0	4511900	0	12646000	0	6801500	0	10515000	0	11347000	0	17874000	0	14076000	0	1	0	1	0	1	0.18	1	0	1	0	1	0	1	0	1	0	1	0	12	0	9	0	13	0	15	0
Prolyl 3,4-dihydroxylase TPA1 OS=Saccharomyces cerevisiae (strain ATCC 204508 / S288c) OX=559292 GN=TPA1 PE=1 SV=1	P40032	TPA1	74 kDa		unknown	4067800	0	5429300	0	1925200	0	2363100	0	5926800	0	1764000	0	922420	2118900	2379800	0	2901700	0	1	0	1	0.3	1	0	1	0	1	0.74	1	0.36	1	0.36	1	0	1	0.41	18	0	23	0	9	0	9	0
Protein ARG5,6, mitochondrial OS=Saccharomyces cerevisiae (strain ATCC 204508 / S288c) OX=559292 GN=ARG5,6 PE=1 SV=1	Q01217	ARG5	95 kDa		unknown	1190100	0	3104200	0	2552300	0	1235500	0	4339700	0	1626800	0	1342000	0	4692500	0	2783500	0	1	0	1	0	1	0	1	0	1	0	1	0	1	0	1	0.08	1	0	14	0	13	0	18	0	11	0
Uncharacterized protein YPL245W OS=Saccharomyces cerevisiae (strain ATCC 204508 / S288c) OX=559292 GN=YPL245W PE=1 SV=1	Q12179	YPL245W	52 kDa		unknown	5742000	-1	4312700	0	3991800	0	2626700	0	1908800	0	5731500	0	4298000	0	7749400	-1	7947500	-1	1	0	1	0	1	0	1	0	1	0	1	0	1	0.14	1	0	1	0	17	0	17	0	14	0	8	0
Serine/threonine-protein phosphatase PP1-2 OS=Saccharomyces cerevisiae (strain ATCC 204508 / S288c) OX=559292 GN=GLC7 PE=1 SV=1	P32598	GLC7	36 kDa		unknown	8826900	-1	13233000	-1	9667800	0	15694000	0	9424900	0	14379000	-1	13899000	0	8588100	-1	14032000	-1	1	0	1	0	1	0	1	0	1	0	1	0	1	0	1	0	1	0	17	0	17	0	10	0	16	0
Cytochrome c1, heme protein, mitochondrial OS=Saccharomyces cerevisiae (strain ATCC 204508 / S288c) OX=559292 GN=CYT1 PE=1 SV=1	P07143	CYT1	34 kDa		unknown	12313000	0	36781000	-1	33827000	0	264680000	13586000	25185000	0	34048000	0	15515000	0	31824000	-1	20058000	0	1	0	1	0	1	0	1	0.98	1	0	1	0	1	0	1	0	1	0	11	0	11	0	15	0	45	1
Ribosome biogenesis protein TSR1 OS=Saccharomyces cerevisiae (strain ATCC 204508 / S288c) OX=559292 GN=TSR1 PE=1 SV=1	Q07381	TSR1	91 kDa		unknown	1491200	0	2373400	0	2700000	0	2275300	0	7581900	0	6744000	0	8116100	0	7856200	0	5933700	0	1	0.06	1	0	1	0	1	0	1	0	1	0	1	0	1	0	1	0	10	0	10	0	14	0	9	0
54S ribosomal protein L40, mitochondrial OS=Saccharomyces cerevisiae (strain ATCC 204508 / S288c) OX=559292 GN=MRPL40 PE=1 SV=2	P36534	MRPL40	34 kDa		unknown	11629000	0	14173000	0	16069000	-1	16722000	0	30106000	-1	16547000	0	10153000	0	12239000	0	14135000	0	1	0	1	0	1	0	1	0	1	0	1	0	1	0	1	0	1	0.11	19	0	16	0	14	0	13	0
Pre-mRNA-splicing factor ATP-dependent RNA helicase PRP43 OS=Saccharomyces cerevisiae (strain ATCC 204508 / S288c) OX=559292 GN=PRP43 PE=1 SV=1	P53131	PRP43	88 kDa		unknown	1332500	0	1005700	0	767500	0	1921500	0	2891500	0	4967700	0	2146400	0	3079300	-1	2924400	0	1	0	1	0	1	0	1	0	1	0	1	0	1	0	1	0	1	0	16	0	12	0	6	0	13	0
High mobility group protein 1 OS=Saccharomyces cerevisiae (strain ATCC 204508 / S288c) OX=559292 GN=HMO1 PE=1 SV=1	Q03973	HMO1	28 kDa		unknown	163850000	0	146150000	0	184050000	0	296310000	0	35016000	29055000	81860000	9951200	36962000	0	117570000	0	146490000	-1	1	0	1	0	1	0	1	0	1	0.76	1	1	1	0	1	0	1	0	19	0	17	0	17	0	17	0
Sister chromatid cohesion protein PDS5 OS=Saccharomyces cerevisiae (strain ATCC 204508 / S288c) OX=559292 GN=PDS5 PE=1 SV=1	Q04264	PDS5	147 kDa		unknown	95914	350970000	370540	0	377900	0	1524300	15664000	1280700	0	1386900	0	755220	0	3112700	0	1424000	0	1	0.84	1	0	1	0	1	0.95	1	0	1	0	1	0	1	0.09	1	0.39	4	2	5	0	10	0	19	1
37S ribosomal protein S24, mitochondrial OS=Saccharomyces cerevisiae (strain ATCC 204508 / S288c) OX=559292 GN=RSM24 PE=1 SV=1	Q03976	RSM24	37 kDa		unknown	4307500	0	5610700	0	7984300	0	13725000	-1	14337000	0	8337700	0	10369000	0	11731000	0	8116000	0	1	0	1	0	1	0	1	0	1	0	1	0	1	0	1	0	1	0.05	16	0	13	0	16	0	15	0
Partitioning protein REP1 OS=Saccharomyces cerevisiae (strain ATCC 204508 / S288c) OX=559292 GN=REP1 PE=1 SV=1	P03871	REP1	43 kDa		unknown	20931000	0	12577000	0	8098000	0	12681000	0	21308000	-1	0	0	23252000	11718000	0	0	0	0	1	0.12	1	0	1	0	1	0	1	0	0	0	1	1	0	0	0	0	30	0	24	0	18	0	18	0
Dolichyl-phosphate-mannose--protein mannosyltransferase 1 OS=Saccharomyces cerevisiae (strain ATCC 204508 / S288c) OX=559292 GN=PMT1 PE=1 SV=1	P33775	PMT1	93 kDa		unknown	6388100	0	5485300	0	4626500	0	12579000	0	7913800	0	5625900	0	6211400	0	893460	0	5366400	0	1	0	1	0	1	0	1	0	1	0	1	0	1	0.24	1	0	1	0	19	0	15	0	14	0	26	0
Saccharopine dehydrogenase [NADP(+), L-glutamate-forming] OS=Saccharomyces cerevisiae (strain ATCC 204508 / S288c) OX=559292 GN=LYS9 PE=1 SV=1	P38999	LYS9	49 kDa		unknown	682360	0	2088300	0	5695400	0	4641900	0	11360000	0	4688700	0	2453100	0	5535200	0	6141800	0	1	0	1	0	1	0	1	0	1	0.09	1	0	1	0	1	0	1	0	4	0	13	0	15	0	12	0
Ribosomal lysine N-methyltransferase 4 OS=Saccharomyces cerevisiae (strain ATCC 204508 / S288c) OX=559292 GN=RKM4 PE=1 SV=1	Q12504	RKM4	57 kDa		unknown	3397200	0	5764300	0	5205100	0	5689200	0	7615500	0	11791000	0	6488500	0	7593900	0	13928000	0	1	0	1	0	1	0	1	0	1	0	1	0	1	0	1	0	1	0	6	0	10	0	11	0	13	0
Eukaryotic peptide chain release factor GTP-binding subunit OS=Saccharomyces cerevisiae (strain ATCC 204508 / S288c) OX=559292 GN=SUP35 PE=1 SV=1	P05453	SUP35	77 kDa		unknown	1458400	0	502560	0	1561200	0	1490400	0	4628600	0	5825900	0	4383600	0	14316000	0	4757700	0	1	0.06	1	0	1	0	1	0	1	0	1	0	1	0	1	0	1	0.19	10	0	4	0	9	0	6	0
Sterol 24-C-methyltransferase OS=Saccharomyces cerevisiae (strain ATCC 204508 / S288c) OX=559292 GN=ERG6 PE=1 SV=4	P25087	ERG6	43 kDa		unknown	4277100	0	3379600	0	2847800	0	6363200	0	5041600	0	9119900	0	9538500	0	13531000	0	8281600	0	1	0.15	1	0	1	0	1	0	1	0	1	0	1	0	1	0	1	0.12	12	0	8	0	11	0	14	0
Replication factor C subunit 2 OS=Saccharomyces cerevisiae (strain ATCC 204508 / S288c) OX=559292 GN=RFC2 PE=1 SV=1	P40348	RFC2	40 kDa		unknown	11068000	0	8631400	0	6437500	0	7394200	0	4078100	0	11437000	-1	11033000	0	12183000	0	10434000	0	1	0	1	0	1	0	1	0	1	0	1	0	1	0	1	0	1	0	22	0	15	0	12	0	13	0
Chromatin structure-remodeling complex protein RSC3 OS=Saccharomyces cerevisiae (strain ATCC 204508 / S288c) OX=559292 GN=RSC3 PE=1 SV=1	Q06639	RSC3	102 kDa		unknown	769240	0	941710	0	722280	0	1660100	0	3227400	0	2787600	0	2095000	0	3220000	0	2862100	0	1	0	1	0	1	0	1	0	1	0	1	0	1	0	1	0.13	1	0	11	0	13	0	10	0	16	0
ATPase GET3 OS=Saccharomyces cerevisiae (strain ATCC 204508 / S288c) OX=559292 GN=GET3 PE=1 SV=1	Q12154	GET3	39 kDa		unknown	9498600	0	9098900	0	4362300	0	7810000	0	11407000	0	31739000	0	17072000	0	45271000	0	32638000	0	1	0	1	0	1	0	1	0	1	0	1	0	1	0	1	0	1	0	11	0	9	0	9	0	9	0
Nucleoporin NUP82 OS=Saccharomyces cerevisiae (strain ATCC 204508 / S288c) OX=559292 GN=NUP82 PE=1 SV=2	P40368	NUP82	82 kDa		unknown	1767900	0	2989100	0	8120500	0	4805700	0	2458000	0	2299200	3030300	2678000	0	4926100	0	2139400	0	1	0	1	0	1	0	1	0	1	0	1	0.42	1	0	1	0	1	0	11	0	17	0	18	0	16	0
Multiple RNA-binding domain-containing protein 1 OS=Saccharomyces cerevisiae (strain ATCC 204508 / S288c) OX=559292 GN=MRD1 PE=1 SV=1	Q06106	MRD1	101 kDa		unknown	3953200	0	4250800	0	1126200	0	1479100	0	2238300	0	1681200	0	1323400	0	1179000	0	1678800	0	1	0	1	0	1	0	1	0	1	0	1	0	1	0	1	0	1	0	22	0	25	0	10	0	16	0
Delta(24(24(1)))-sterol reductase OS=Saccharomyces cerevisiae (strain ATCC 204508 / S288c) OX=559292 GN=ERG4 PE=1 SV=2	P25340	ERG4	56 kDa		unknown	8696700	0	10909000	0	12592000	0	24675000	0	22742000	0	25704000	0	17628000	2376300	10593000	-1	25642000	0	1	0	1	0.22	1	0.07	1	0.06	1	0	1	0	1	0.48	1	0	1	0	16	0	13	0	10	0	19	0
Cluster of ADP-ribosylation factor 1 OS=Saccharomyces cerevisiae (strain ATCC 204508 / S288c) OX=559292 GN=ARF1 PE=1 SV=3 (P11076)	P11076 [2]	ARF1	21 kDa	TRUE	unknown	13808000	0	10969000	0	21674000	0	11144000	0	25413000	0	30902000	0	24746000	0	21147000	0	31695000	0	1	0	1	0	1	0	1	0.17	1	0	1	0	1	0	1	0	1	0	16	0	13	0	15	0	10	0
Hexaprenyl pyrophosphate synthase, mitochondrial OS=Saccharomyces cerevisiae (strain ATCC 204508 / S288c) OX=559292 GN=COQ1 PE=1 SV=1	P18900	COQ1	53 kDa		unknown	4901300	0	4214100	0	8747700	0	5712100	0	5749200	0	9337200	0	6732400	0	4705100	0	8832500	0	1	0	1	0	1	0	1	0	1	0	1	0	1	0	1	0	1	0	17	0	13	0	13	0	11	0
37S ribosomal protein S28, mitochondrial OS=Saccharomyces cerevisiae (strain ATCC 204508 / S288c) OX=559292 GN=MRPS28 PE=1 SV=1	P21771	MRPS28	33 kDa		unknown	4016600	0	2044500	0	4030200	0	4395200	0	15688000	0	10139000	0	6794000	0	10658000	0	9065700	0	1	0.29	1	0	1	0	1	0	1	0.06	1	0	1	0	1	0	1	0	13	0	7	0	8	0	5	0
Acetolactate synthase small subunit, mitochondrial OS=Saccharomyces cerevisiae (strain ATCC 204508 / S288c) OX=559292 GN=ILV6 PE=1 SV=2	P25605	ILV6	34 kDa		unknown	14327000	0	15543000	0	20254000	0	46103000	0	24917000	0	25215000	0	13932000	0	19575000	0	16430000	-1	1	0	1	0	1	0	1	0	1	0	1	0	1	0	1	0	1	0	16	0	18	0	11	0	16	0
U3 small nucleolar ribonucleoprotein protein IMP3 OS=Saccharomyces cerevisiae (strain ATCC 204508 / S288c) OX=559292 GN=IMP3 PE=1 SV=1	P32899	IMP3	22 kDa		unknown	13410000	-1	6678200	0	27270000	0	25071000	-1	13651000	-1	23168000	0	16357000	0	12964000	0	16123000	-1	1	0	1	0	1	0	1	0	1	0	1	0	1	0	1	0	1	0	16	0	14	0	7	0	14	0
60S ribosome subunit biogenesis protein NOP8 OS=Saccharomyces cerevisiae (strain ATCC 204508 / S288c) OX=559292 GN=NOP8 PE=1 SV=1	Q08287	NOP8	57 kDa		unknown	7582200	0	11337000	-1	1968900	-1	3290400	0	1291000	0	9862000	0	5408000	0	3573700	0	6723100	0	1	0	1	0	1	0	1	0	1	0	1	0	1	0	1	0	1	0	17	0	20	0	10	0	8	0
DNA polymerase delta catalytic subunit OS=Saccharomyces cerevisiae (strain ATCC 204508 / S288c) OX=559292 GN=POL3 PE=1 SV=4	P15436	POL3	125 kDa		unknown	461070	0	506160	0	1272100	0	2115100	0	1422500	0	1594900	0	1839500	0	1132400	0	2978600	0	1	0.3	1	0	1	0	1	0	1	0	1	0	1	0	1	0	1	0	7	0	9	0	13	0	16	0
Protein TOM71 OS=Saccharomyces cerevisiae (strain ATCC 204508 / S288c) OX=559292 GN=TOM71 PE=1 SV=1	P38825	TOM71	72 kDa		unknown	3157200	0	6718100	0	3193500	0	4687700	0	4628600	0	2347500	0	1549600	0	13334000	0	3245100	0	1	0	1	0	1	0	1	0	1	0	1	0	1	0	1	0	1	0.06	17	0	23	0	15	0	12	0
Alpha-1,3-mannosyltransferase MNN1 OS=Saccharomyces cerevisiae (strain ATCC 204508 / S288c) OX=559292 GN=MNN1 PE=1 SV=1	P39106	MNN1	89 kDa		unknown	647120	0	2262400	0	692520	0	3487700	0	1721800	-1	2007300	0	1487400	0	3152200	0	1469500	0	1	0	1	0	1	0	1	0.23	1	0	1	0	1	0.1	1	0	1	0	10	0	17	0	7	0	17	0
Trafficking protein particle complex II-specific subunit 120 OS=Saccharomyces cerevisiae (strain ATCC 204508 / S288c) OX=559292 GN=TRS120 PE=1 SV=1	Q04183	TRS120	148 kDa		unknown	290190	0	26592	0	707590	0	832470	0	1031000	0	1323500	0	1293900	0	2379300	0	1230500	0	1	0	0.6	0	1	0	1	0.19	1	0.41	1	0	1	0	1	0	1	0.1	10	0	1	0	11	0	12	0
Protein transport protein SEC61 OS=Saccharomyces cerevisiae (strain ATCC 204508 / S288c) OX=559292 GN=SEC61 PE=1 SV=1	P32915	SEC61	53 kDa		unknown	17798000	0	18302000	0	18400000	3493300	18931000	0	43064000	0	32652000	23650000	33440000	18198000	47520000	7015900	33842000	0	1	0	1	0	1	0.78	1	0	1	0	1	1	1	1	1	0.9	1	0	8	0	7	0	7	1	8	0
E3 ubiquitin-protein ligase TOM1 OS=Saccharomyces cerevisiae (strain ATCC 204508 / S288c) OX=559292 GN=TOM1 PE=1 SV=1	Q03280	TOM1	374 kDa		unknown	90969	4608800	145470	0	289320	0	416830	0	1179200	0	524960	0	198280	0	189970	0	226120	0	1	0.99	1	0	1	0.44	1	0.53	1	0	1	0.13	1	0	1	0	1	0	4	1	6	0	8	0	12	0
Nucleoporin NSP1 OS=Saccharomyces cerevisiae (strain ATCC 204508 / S288c) OX=559292 GN=NSP1 PE=1 SV=1	P14907	NSP1	87 kDa		unknown	3344700	0	4424700	0	1172000	0	9877600	0	1206000	0	579890	0	5010700	0	2245800	0	1005600	0	1	0	1	0	1	0	1	0	1	0	1	0.13	1	0	1	0	1	0	16	0	19	0	5	0	29	0
Pyrroline-5-carboxylate reductase OS=Saccharomyces cerevisiae (strain ATCC 204508 / S288c) OX=559292 GN=PRO3 PE=1 SV=1	P32263	PRO3	30 kDa		unknown	17327000	0	36481000	0	28326000	-1	16138000	0	35623000	-1	25810000	10253000	43599000	8001000	41696000	0	25274000	0	1	0	1	0	1	0	1	0	1	0	1	0.37	1	0.33	1	0.12	1	0	12	0	17	0	12	0	8	0
Serine/threonine-protein kinase CLA4 OS=Saccharomyces cerevisiae (strain ATCC 204508 / S288c) OX=559292 GN=CLA4 PE=1 SV=1	P48562	CLA4	94 kDa	TRUE	unknown	2488400	0	2275700	0	3306500	0	2690700	0	2807700	0	3279600	0	2392800	0	2177600	0	2816400	0	1	0	1	0	1	0	1	0	1	0	1	0	1	0	1	0	1	0	18	0	16	0	20	0	15	0
DnaJ-related protein SCJ1 OS=Saccharomyces cerevisiae (strain ATCC 204508 / S288c) OX=559292 GN=SCJ1 PE=1 SV=2	P25303	SCJ1	42 kDa		unknown	12686000	0	11154000	-1	9493000	0	16709000	0	7405500	0	10434000	-1	10538000	-1	11143000	0	9365400	0	1	0	1	0	1	0	1	0	1	0	1	0	1	0	1	0	1	0	19	0	18	0	11	0	17	0
54S ribosomal protein L7, mitochondrial OS=Saccharomyces cerevisiae (strain ATCC 204508 / S288c) OX=559292 GN=MRPL7 PE=1 SV=2	P36519	MRPL7	33 kDa		unknown	17540000	0	18979000	0	22285000	0	11578000	0	20637000	0	10088000	0	12424000	0	23240000	0	14650000	0	1	0	1	0	1	0	1	0	1	0	1	0	1	0	1	0	1	0	13	0	15	0	13	0	14	0
Probable phospholipid-transporting ATPase NEO1 OS=Saccharomyces cerevisiae (strain ATCC 204508 / S288c) OX=559292 GN=NEO1 PE=1 SV=1	P40527	NEO1	130 kDa		unknown	1261000	539300000	412860	435160000	173970	4192000000	192310	1081200000	2866700	1715900000	1087700	6062100000	191050	337070000	1072900	89398000	520010	6806600000	1	0.99	1	0.42	1	0.97	1	0.99	1	0.98	1	0.96	1	0.95	1	0.97	1	0.98	7	4	6	1	8	10	2	3
AP-3 complex subunit delta OS=Saccharomyces cerevisiae (strain ATCC 204508 / S288c) OX=559292 GN=APL5 PE=1 SV=1	Q08951	APL5	107 kDa		unknown	939550	0	1385900	0	182920	0	1709900	0	3945600	0	4262800	0	2211900	0	2357700	0	1812300	0	1	0	1	0	1	0	1	0	1	0	1	0	1	0	1	0	1	0	11	0	7	0	4	0	11	0
Transcriptional regulator URE2 OS=Saccharomyces cerevisiae (strain ATCC 204508 / S288c) OX=559292 GN=URE2 PE=1 SV=1	P23202	URE2	40 kDa		unknown	4308100	0	5503200	0	10358000	0	8151000	0	7133800	0	9829500	0	10829000	0	14060000	-1	9611800	0	1	0	1	0	1	0	1	0	1	0	1	0.12	1	0	1	0	1	0	12	0	8	0	15	0	12	0
U3 small nucleolar RNA-associated protein 5 OS=Saccharomyces cerevisiae (strain ATCC 204508 / S288c) OX=559292 GN=UTP5 PE=1 SV=1	Q04177	UTP5	72 kDa		unknown	9428100	0	8964400	0	4413200	-1	7674100	0	7339000	0	18450000	-1	11765000	0	19323000	0	11663000	0	1	0	1	0	1	0	1	0	1	0	1	0	1	0	1	0	1	0	16	0	8	0	6	0	9	0
Nucleolar protein 6 OS=Saccharomyces cerevisiae (strain ATCC 204508 / S288c) OX=559292 GN=NOP6 PE=1 SV=1	Q07623	NOP6	25 kDa		unknown	28112000	0	32319000	0	19957000	0	18082000	0	32967000	-1	24988000	0	32791000	-1	16093000	0	24740000	0	1	0.21	1	0.29	1	0.11	1	0	1	0	1	0	1	0	1	0	1	0	20	0	17	0	14	0	14	0
Tryptophan synthase OS=Saccharomyces cerevisiae (strain ATCC 204508 / S288c) OX=559292 GN=TRP5 PE=1 SV=1	P00931	TRP5	77 kDa		unknown	858180	201860000	1285200	0	2133600	1087800	1569800	0	4446100	0	2290600	0	3269300	0	3333300	0	4052300	0	1	0.74	1	0	1	0.46	1	0.06	1	0	1	0.26	1	0	1	0.07	1	0.22	12	8	9	0	10	1	11	0
Nucleosome assembly protein OS=Saccharomyces cerevisiae (strain ATCC 204508 / S288c) OX=559292 GN=NAP1 PE=1 SV=2	P25293	NAP1	48 kDa		unknown	8096300	0	10634000	0	12093000	-1	7910000	0	10565000	-1	9859700	-1	5301300	0	17285000	-1	6640800	-1	1	0	1	0	1	0	1	0	1	0	1	0	1	0	1	0	1	0	14	0	13	0	17	0	14	0
ER-localized J domain-containing protein 5 OS=Saccharomyces cerevisiae (strain ATCC 204508 / S288c) OX=559292 GN=ERJ5 PE=1 SV=1	P43613	ERJ5	34 kDa		unknown	23286000	0	16222000	0	21162000	0	25063000	-1	18880000	0	29080000	0	26593000	0	38282000	-1	22858000	-1	1	0	1	0	1	0	1	0	1	0	1	0	1	0	1	0	1	0	17	0	16	0	20	0	16	0
Inorganic phosphate transporter PHO86 OS=Saccharomyces cerevisiae (strain ATCC 204508 / S288c) OX=559292 GN=PHO86 PE=1 SV=1	P46956	PHO86	35 kDa		unknown	13431000	0	16434000	0	13752000	12313000	27086000	0	24033000	0	17623000	4374800	16301000	2749100	18156000	0	18100000	-1	1	0	1	0.78	1	0.45	1	0	1	0	1	0.41	1	0.7	1	0	1	0	13	0	15	1	15	1	14	0
37S ribosomal protein S17, mitochondrial OS=Saccharomyces cerevisiae (strain ATCC 204508 / S288c) OX=559292 GN=MRPS17 PE=1 SV=1	Q03246	MRPS17	28 kDa		unknown	7394700	0	7740500	0	12343000	0	20478000	0	23233000	0	18995000	0	17277000	0	24573000	0	15596000	0	1	0.29	1	0	1	0	1	0	1	0	1	0	1	0	1	0	1	0.25	10	0	12	0	9	0	15	0
Aconitate hydratase, mitochondrial OS=Saccharomyces cerevisiae (strain ATCC 204508 / S288c) OX=559292 GN=ACO1 PE=1 SV=2	P19414	ACO1	85 kDa		unknown	1503700	0	615210	0	3565100	0	4800900	0	8421500	0	3788300	0	2850700	0	6255800	0	4337100	0	1	0	1	0	1	0	1	0	1	0	1	0	1	0	1	0	1	0	12	0	6	0	13	0	13	0
Uncharacterized GTP-binding protein YGR210C OS=Saccharomyces cerevisiae (strain ATCC 204508 / S288c) OX=559292 GN=YGR210C PE=1 SV=1	P42942	YGR210C	45 kDa		unknown	5123000	0	4226200	0	5087000	0	5646700	0	8278900	0	5121200	0	4196500	0	7340200	0	8730100	0	1	0	1	0	1	0	1	0	1	0	1	0	1	0	1	0.11	1	0	15	0	11	0	10	0	12	0
Inclusion body clearance protein IML2 OS=Saccharomyces cerevisiae (strain ATCC 204508 / S288c) OX=559292 GN=IML2 PE=1 SV=1	P47031	IML2	83 kDa		unknown	1576300	0	1823300	0	4793200	0	4052400	0	4183700	0	3434400	0	4117100	0	6517100	0	3810600	0	1	0	1	0	1	0	1	0.09	1	0.12	1	0.09	1	0	1	0	1	0	9	0	10	0	16	0	11	0
37S ribosomal protein MRP51, mitochondrial OS=Saccharomyces cerevisiae (strain ATCC 204508 / S288c) OX=559292 GN=MRP51 PE=1 SV=1	Q02950	MRP51	39 kDa		unknown	6058700	0	6084700	0	8775400	0	9042000	0	10732000	0	8246300	0	11871000	0	6596100	0	4936300	0	1	0	1	0	1	0	1	0	1	0	1	0	1	0	1	0	1	0.07	14	0	11	0	13	0	14	0
Serine/threonine-protein kinase RIO1 OS=Saccharomyces cerevisiae (strain ATCC 204508 / S288c) OX=559292 GN=RIO1 PE=1 SV=1	Q12196	RIO1	56 kDa		unknown	1976700	0	776890	-1	5640800	0	4520300	0	857880	0	11976000	0	1727500	0	17822000	0	11635000	0	1	0.13	1	0	1	0	1	0	1	0	1	0	1	0	1	0	1	0	10	0	5	0	15	0	14	0
Cluster of Serine/threonine-protein phosphatase PP2A-2 catalytic subunit OS=Saccharomyces cerevisiae (strain ATCC 204508 / S288c) OX=559292 GN=PPH22 PE=1 SV=1 (P23595)	P23595 [2]	PPH22	43 kDa	TRUE	unknown	3747700	-1	5432900	-1	1544300	0	6883100	0	10615000	-1	6201000	0	6886800	-1	10981000	-1	10371000	-1	1	0	1	0	1	0	1	0	1	0	1	0	1	0	1	0	1	0	9	0	14	0	9	0	13	0
Cell division control protein 10 OS=Saccharomyces cerevisiae (strain ATCC 204508 / S288c) OX=559292 GN=CDC10 PE=1 SV=1	P25342	CDC10	37 kDa		unknown	4648500	0	6701900	-1	7147200	0	7976300	0	2846200	0	2694800	0	2453700	0	2102500	-1	4281200	0	1	0	1	0	1	0	1	0.16	1	0	1	0	1	0.07	1	0	1	0.45	19	0	18	0	15	0	18	0
Cystathionine gamma-lyase OS=Saccharomyces cerevisiae (strain ATCC 204508 / S288c) OX=559292 GN=CYS3 PE=1 SV=2	P31373	CYS3	43 kDa		unknown	12642000	0	8969000	0	10998000	-1	16470000	-1	11571000	0	15561000	0	17854000	0	24343000	0	19414000	0	1	0.08	1	0	1	0	1	0	1	0.06	1	0	1	0	1	0	1	0	19	0	15	0	7	0	14	0
H/ACA ribonucleoprotein complex subunit NHP2 OS=Saccharomyces cerevisiae (strain ATCC 204508 / S288c) OX=559292 GN=NHP2 PE=1 SV=2	P32495	NHP2	17 kDa		unknown	150080000	0	132890000	0	42655000	0	83181000	0	92616000	-1	50042000	0	108710000	0	3287200	0	116280000	-1	1	0	1	0	1	0	1	0	1	0	1	0	1	0	0.97	0	1	0	25	0	23	0	12	0	9	0
Signal recognition particle subunit SRP14 OS=Saccharomyces cerevisiae (strain ATCC 204508 / S288c) OX=559292 GN=SRP14 PE=1 SV=1	P38985	SRP14	16 kDa		unknown	28444000	0	28421000	0	21547000	-1	24552000	0	22816000	0	31237000	0	45905000	-1	57120000	0	33956000	0	1	0	1	0	1	0	1	0	1	0	1	0	1	0	1	0	1	0	17	0	16	0	17	0	13	0
Protein RMD9, mitochondrial OS=Saccharomyces cerevisiae (strain ATCC 204508 / S288c) OX=559292 GN=RMD9 PE=1 SV=1	P53140	RMD9	75 kDa		unknown	724200	0	2734100	0	3113800	0	3000500	0	3740200	0	4183600	0	2518200	0	4394500	0	4040100	0	1	0	1	0	1	0	1	0	1	0	1	0	1	0	1	0	1	0	9	0	13	0	13	0	12	0
Glycerol-3-phosphate dehydrogenase [NAD(+)] 2, mitochondrial OS=Saccharomyces cerevisiae (strain ATCC 204508 / S288c) OX=559292 GN=GPD2 PE=1 SV=2	P41911	GPD2	49 kDa	TRUE	unknown	6057200	0	11702000	0	9700600	0	4845000	0	9405600	0	4939500	0	5508200	0	12559000	0	7183800	0	1	0	1	0	1	0	1	0	1	0	1	0	1	0	1	0	1	0	16	0	22	0	12	0	7	0
Ribosome biogenesis protein ENP2 OS=Saccharomyces cerevisiae (strain ATCC 204508 / S288c) OX=559292 GN=ENP2 PE=1 SV=2	P48234	ENP2	82 kDa		unknown	2874900	0	2873000	0	2053100	0	2946900	0	5094600	-1	6942000	0	6171800	0	3224800	0	2561400	0	1	0.37	1	0	1	0	1	0	1	0	1	0	1	0	1	0	1	0	14	0	16	0	10	0	13	0
Methylsterol monooxygenase OS=Saccharomyces cerevisiae (strain ATCC 204508 / S288c) OX=559292 GN=ERG25 PE=1 SV=1	P53045	ERG25	36 kDa		unknown	58787000	-1	65763000	-1	39362000	-1	84636000	-1	89454000	0	118610000	0	74264000	12987000	168480000	-1	103650000	-1	1	0	1	0	1	0	1	0	1	0	1	0	1	0.95	1	0	1	0	11	0	14	0	12	0	11	0
Protein SMY2 OS=Saccharomyces cerevisiae (strain ATCC 204508 / S288c) OX=559292 GN=SMY2 PE=1 SV=2	P32909	SMY2	81 kDa		unknown	5579900	0	2156200	0	1967700	0	3042500	0	1235500	0	4577800	96112000	4177700	0	2868100	0	2245400	0	1	0.38	1	0	1	0	1	0.3	1	0	1	0.46	1	0.13	1	0.11	1	0	10	0	8	0	8	0	13	0
S-methyl-5'-thioadenosine phosphorylase OS=Saccharomyces cerevisiae (strain ATCC 204508 / S288c) OX=559292 GN=MEU1 PE=1 SV=1	Q07938	MEU1	38 kDa		unknown	4288600	0	167220	299150000	14780000	0	18632000	38761000	14272000	0	17437000	0	21378000	0	37837000	0	15796000	0	1	0.61	1	0.46	1	0.28	1	0.57	1	0.13	1	0.14	1	0.23	1	0.09	1	0	8	0	3	2	11	0	9	1
Probable proteasome subunit alpha type-7 OS=Saccharomyces cerevisiae (strain ATCC 204508 / S288c) OX=559292 GN=PRE10 PE=1 SV=2	P21242	PRE10	32 kDa		unknown	19265000	0	16888000	0	11354000	0	23474000	0	11808000	-1	24382000	0	17177000	0	18251000	-1	20425000	-1	1	0.09	1	0	1	0	1	0	1	0	1	0	1	0	1	0	1	0	14	0	11	0	13	0	13	0
Bile pigment transporter 1 OS=Saccharomyces cerevisiae (strain ATCC 204508 / S288c) OX=559292 GN=BPT1 PE=1 SV=2	P14772	BPT1	177 kDa	TRUE	unknown	687080	0	1716900	0	1038000	0	2306700	0	1178900	0	1554500	0	634070	0	1421800	0	655610	0	1	0	1	0	1	0	1	0	1	0	1	0	1	0	1	0	1	0.08	12	0	14	0	8	0	17	0
Ras-related protein SEC4 OS=Saccharomyces cerevisiae (strain ATCC 204508 / S288c) OX=559292 GN=SEC4 PE=1 SV=1	P07560	SEC4	24 kDa	TRUE	unknown	9884700	0	4370900	0	13839000	0	29388000	0	9840500	0	18505000	0	13913000	0	29212000	0	17637000	29052000	1	0	1	0	1	0	1	0	1	0	1	0	1	0	1	0	1	0.12	17	0	11	0	16	0	17	0
Alpha-1,2 mannosyltransferase KTR1 OS=Saccharomyces cerevisiae (strain ATCC 204508 / S288c) OX=559292 GN=KTR1 PE=1 SV=1	P27810	KTR1	46 kDa		unknown	370130	0	3128400	0	2640300	0	27128000	0	4943100	0	5777200	0	7772200	0	7192600	0	4925200	0	1	0	1	0	1	0	1	0	1	0	1	0	1	0	1	0	1	0	3	0	15	0	9	0	22	0
54S ribosomal protein L4, mitochondrial OS=Saccharomyces cerevisiae (strain ATCC 204508 / S288c) OX=559292 GN=MRPL4 PE=1 SV=2	P36517	MRPL4	37 kDa		unknown	7017800	0	9390200	-1	11282000	0	12852000	-1	17614000	-1	10324000	0	14912000	0	15868000	0	13104000	0	1	0.11	1	0	1	0	1	0	1	0	1	0	1	0	1	0	1	0	17	0	12	0	11	0	12	0
Transcription initiation factor TFIID subunit 5 OS=Saccharomyces cerevisiae (strain ATCC 204508 / S288c) OX=559292 GN=TAF5 PE=1 SV=1	P38129	TAF5	89 kDa		unknown	2225600	0	1592800	0	1929200	0	2698800	0	2335300	0	3424500	0	5229000	0	7583000	0	2189200	0	1	0.14	1	0	1	0.05	1	0	1	0.15	1	0	1	0	1	0	1	0	19	0	8	0	9	0	11	0
Cytoplasmic 60S subunit biogenesis factor REH1 OS=Saccharomyces cerevisiae (strain ATCC 204508 / S288c) OX=559292 GN=REH1 PE=1 SV=1	Q06709	REH1	50 kDa		unknown	8919000	0	8140300	0	12798000	0	9041600	0	25284000	0	18712000	0	14738000	0	8190100	0	10125000	0	1	0	1	0	1	0	1	0	1	0	1	0	1	0	1	0	1	0	12	0	11	0	13	0	11	0
26S proteasome regulatory subunit RPN6 OS=Saccharomyces cerevisiae (strain ATCC 204508 / S288c) OX=559292 GN=RPN6 PE=1 SV=3	Q12377	RPN6	50 kDa		unknown	4086300	0	6299400	0	11478000	0	7814300	0	457570000	0	14245000	0	6330200	0	12668000	0	7706000	0	1	0	1	0	1	0	1	0	1	0	1	0	1	0	1	0	1	0	7	0	10	0	12	0	11	0
54S ribosomal protein IMG1, mitochondrial OS=Saccharomyces cerevisiae (strain ATCC 204508 / S288c) OX=559292 GN=IMG1 PE=1 SV=1	P25626	IMG1	19 kDa		unknown	12445000	0	9999100	-1	12233000	0	22344000	-1	23003000	-1	18366000	-1	22111000	0	25075000	0	18082000	0	1	0	1	0	1	0	1	0	1	0	1	0	1	0	1	0	1	0	11	0	12	0	11	0	15	0
Superoxide dismutase [Mn], mitochondrial OS=Saccharomyces cerevisiae (strain ATCC 204508 / S288c) OX=559292 GN=SOD2 PE=1 SV=1	P00447	SOD2	26 kDa		unknown	0	0	0	0	42319000	0	90500000	0	33749000	0	14910000	0	74146000	0	42995000	0	35605000	0	0	0	0	0	1	0	1	0	1	0.85	1	0	1	0.12	1	0.69	1	0.79	0	0	0	0	18	0	16	0
Dihydroxy-acid dehydratase, mitochondrial OS=Saccharomyces cerevisiae (strain ATCC 204508 / S288c) OX=559292 GN=ILV3 PE=1 SV=2	P39522	ILV3	63 kDa		unknown	1337800	0	1719400	0	2667300	0	8537400	0	10024000	0	4106600	0	3328500	0	4484500	0	4048600	0	1	0	1	0	1	0	1	0	1	0.06	1	0	1	0	1	0	1	0.24	8	0	8	0	10	0	19	0
ER-derived vesicles protein ERV46 OS=Saccharomyces cerevisiae (strain ATCC 204508 / S288c) OX=559292 GN=ERV46 PE=1 SV=2	P39727	ERV46	46 kDa		unknown	8629400	0	9040000	0	8731000	0	8286100	0	10469000	-1	8853500	-1	8846100	0	20690000	0	7239600	0	1	0	1	0	1	0	1	0	1	0	1	0	1	0	1	0	1	0	16	0	11	0	12	0	8	0
Proliferating cell nuclear antigen OS=Saccharomyces cerevisiae (strain ATCC 204508 / S288c) OX=559292 GN=POL30 PE=1 SV=1	P15873	POL30	29 kDa		unknown	3556300	0	3933500	0	7152100	0	9936700	0	11243000	0	18292000	0	9581100	0	1488100	0	8638500	0	1	0.56	1	0	1	0	1	0	1	0.25	1	0	1	0	1	0	1	0.24	12	0	8	0	9	0	10	0
54S ribosomal protein L17, mitochondrial OS=Saccharomyces cerevisiae (strain ATCC 204508 / S288c) OX=559292 GN=MRPL17 PE=1 SV=2	P36528	MRPL17	32 kDa		unknown	3887000	0	4888500	0	132520000	0	7301000	0	13139000	0	9859600	0	7024100	0	8766900	0	7137000	0	1	0	1	0	1	0	1	0	1	0	1	0	1	0	1	0	1	0	11	0	10	0	15	0	13	0
Adenylate kinase isoenzyme 6 homolog FAP7 OS=Saccharomyces cerevisiae (strain ATCC 204508 / S288c) OX=559292 GN=FAP7 PE=1 SV=1	Q12055	FAP7	23 kDa		unknown	8133900	0	12474000	-1	17833000	-1	25168000	-1	3411200	-1	14260000	0	22950000	-1	49055000	-1	27812000	-1	1	0	1	0	1	0	1	0	1	0	1	0	1	0	1	0	1	0	11	0	14	0	16	0	17	0
Transmembrane 9 superfamily member 1 OS=Saccharomyces cerevisiae (strain ATCC 204508 / S288c) OX=559292 GN=EMP70 PE=1 SV=2	P32802	EMP70	76 kDa	TRUE	unknown	4417900	0	5093500	0	3349900	0	2433500	0	3202000	0	6033600	0	5746000	0	9425700	-1	5167700	0	1	0	1	0	1	0	1	0	1	0	1	0	1	0	1	0	1	0	16	0	16	0	9	0	4	0
Exocyst complex component EXO84 OS=Saccharomyces cerevisiae (strain ATCC 204508 / S288c) OX=559292 GN=EXO84 PE=1 SV=1	P38261	EXO84	86 kDa		unknown	462910	0	286790	0	838490	0	1446700	0	2638900	0	3466000	0	1175900	0	2702500	0	1640800	0	1	0	1	0	1	0	1	0	1	0.08	1	0	1	0	1	0	1	0	8	0	7	0	6	0	15	0
Putative ATP-dependent RNA helicase YLR419W OS=Saccharomyces cerevisiae (strain ATCC 204508 / S288c) OX=559292 GN=YLR419W PE=1 SV=1	Q06698	YLR419W	163 kDa		unknown	1301600	2192500000	422850	680620000	333520	0	413330	0	677740	0	953240	0	949260	0	927680	0	800800	115890000	1	0.74	1	0.92	1	0.98	1	0.58	1	0.42	1	0.29	1	0.86	1	0.85	1	0.59	9	1	11	1	5	1	9	0
Ribosome assembly protein SQT1 OS=Saccharomyces cerevisiae (strain ATCC 204508 / S288c) OX=559292 GN=SQT1 PE=1 SV=2	P35184	SQT1	47 kDa		unknown	25058000	0	26216000	0	25637000	0	33621000	0	26167000	0	37779000	-1	33819000	0	66251000	0	31365000	0	1	0	1	0	1	0	1	0	1	0	1	0	1	0	1	0	1	0	18	0	19	0	8	0	9	0
37S ribosomal protein S9, mitochondrial OS=Saccharomyces cerevisiae (strain ATCC 204508 / S288c) OX=559292 GN=MRPS9 PE=1 SV=1	P38120	MRPS9	32 kDa		unknown	11924000	0	11989000	0	17354000	0	22645000	0	20798000	-1	16752000	0	23650000	0	14127000	0	17937000	0	1	0	1	0	1	0	1	0	1	0	1	0	1	0	1	0	1	0	15	0	13	0	10	0	12	0
Serine/threonine-protein phosphatase 2A 56 kDa regulatory subunit delta isoform OS=Saccharomyces cerevisiae (strain ATCC 204508 / S288c) OX=559292 GN=RTS1 PE=1 SV=2	P38903	RTS1	85 kDa		unknown	3187500	0	3974600	0	5346900	0	4656600	0	4650600	0	7881300	0	4676200	0	8064500	0	5034400	0	1	0.05	1	0	1	0	1	0	1	0	1	0	1	0	1	0	1	0	14	0	12	0	12	0	11	0
Heat shock protein SSC3, mitochondrial OS=Saccharomyces cerevisiae (strain ATCC 204508 / S288c) OX=559292 GN=ECM10 PE=3 SV=1	P39987	ECM10	70 kDa	TRUE	unknown	3090800	0	6164500	0	5876000	0	11368000	0	10040000	0	14326000	0	8419500	0	3370800	0	14148000	0	0.75	0	0.5	0	0.46	0	0.99	0	0.85	0	0.7	0	0.91	0.11	0.27	0	0.7	0	12	0	13	0	13	0	15	0
GPN-loop GTPase 1 OS=Saccharomyces cerevisiae (strain ATCC 204508 / S288c) OX=559292 GN=NPA3 PE=1 SV=1	P47122	NPA3	43 kDa		unknown	8036400	0	7179000	0	12581000	0	16852000	0	13027000	-1	18890000	0	15302000	2068200	11687000	0	23721000	0	1	0	1	0	1	0	1	0	1	0	1	0	1	0.95	1	0	1	0	10	0	8	0	14	0	14	0
J protein JJJ1 OS=Saccharomyces cerevisiae (strain ATCC 204508 / S288c) OX=559292 GN=JJJ1 PE=1 SV=1	P53863	JJJ1	69 kDa		unknown	2169500	0	2054800	-1	2196900	0	2918400	0	5104400	0	4611600	0	4796200	-1	7151400	0	3291500	0	1	0.72	1	0	1	0	1	0	1	0	1	0	1	0	1	0	1	0	11	1	11	0	12	0	10	0
DNA mismatch repair protein MSH6 OS=Saccharomyces cerevisiae (strain ATCC 204508 / S288c) OX=559292 GN=MSH6 PE=1 SV=1	Q03834	MSH6	140 kDa		unknown	834850	0	1079100	0	932590	0	984450	0	809750	0	1417900	0	370870	0	1737700	0	1335400	0	1	0	1	0	1	0	1	0	1	0	1	0.08	1	0.17	1	0.11	1	0.16	13	0	12	0	11	0	11	0
Signal recognition particle subunit SEC65 OS=Saccharomyces cerevisiae (strain ATCC 204508 / S288c) OX=559292 GN=SEC65 PE=1 SV=1	P29478	SEC65	31 kDa		unknown	9461200	0	9830200	0	11433000	0	18548000	0	11020000	0	16270000	0	19052000	0	17395000	0	12946000	0	1	0.38	1	0	1	0	1	0.07	1	0	1	0	1	0	1	0	1	0	12	0	9	0	14	0	12	0
Mitochondrial carrier protein RIM2 OS=Saccharomyces cerevisiae (strain ATCC 204508 / S288c) OX=559292 GN=RIM2 PE=1 SV=1	P38127	RIM2	42 kDa		unknown	7679900	0	8181300	0	8797600	0	16991000	-1	9959200	-1	15183000	0	10970000	6174100	17069000	0	12981000	-1	1	0	1	0	1	0	1	0	1	0	1	0	1	0.95	1	0	1	0	10	0	9	0	11	0	16	0
37S ribosomal protein PET123, mitochondrial OS=Saccharomyces cerevisiae (strain ATCC 204508 / S288c) OX=559292 GN=PET123 PE=1 SV=1	P17558	PET123	36 kDa		unknown	8206800	0	10674000	0	9520300	0	14737000	0	17832000	0	13324000	0	14440000	0	22645000	0	10635000	0	1	0.15	1	0	1	0	1	0	1	0	1	0.05	1	0	1	0	1	0	12	0	11	0	11	0	13	0
Protein PET10 OS=Saccharomyces cerevisiae (strain ATCC 204508 / S288c) OX=559292 GN=PET10 PE=1 SV=3	P36139	PET10	31 kDa		unknown	620930	0	2144500	0	19236000	0	21704000	0	3495300	0	5267900	0	5833200	0	2685300	0	11716000	0	1	0.11	1	0	1	0	1	0	1	0	1	0	1	0	1	0.07	1	0	7	0	8	0	20	0	19	0
Phosphatidate cytidylyltransferase OS=Saccharomyces cerevisiae (strain ATCC 204508 / S288c) OX=559292 GN=CDS1 PE=1 SV=1	P38221	CDS1	52 kDa		unknown	406330000	105480000	469900000	185990000	500260000	662750000	266830000	74767000	264510000	173330000	223850000	70166000	147050000	568390000	71120000	522440000	15400000	695290000	1	0.73	1	0.46	1	0.46	1	0.54	1	0.51	1	0.33	1	0.5	1	0.46	1	0.58	10	1	8	2	10	3	9	1
PAB1-binding protein 1 OS=Saccharomyces cerevisiae (strain ATCC 204508 / S288c) OX=559292 GN=PBP1 PE=1 SV=1	P53297	PBP1	79 kDa		unknown	1623800	0	2832400	0	1125200	0	3484700	0	4638600	0	5205300	0	3053200	0	3970900	0	2498000	0	1	0.38	1	0	1	0.11	1	0	1	0	1	0	1	0	1	0	1	0	7	0	13	0	5	0	15	0
54S ribosomal protein L13, mitochondrial OS=Saccharomyces cerevisiae (strain ATCC 204508 / S288c) OX=559292 GN=MRPL13 PE=1 SV=2	Q02204	MRPL13	30 kDa		unknown	8573200	0	9732800	0	11744000	-1	16636000	0	11197000	0	13442000	0	14274000	-1	6440900	0	11219000	-1	1	0.09	1	0	1	0	1	0	1	0	1	0	1	0	1	0	1	0	12	0	15	0	16	0	15	0
Ceramide very long chain fatty acid hydroxylase SCS7 OS=Saccharomyces cerevisiae (strain ATCC 204508 / S288c) OX=559292 GN=SCS7 PE=1 SV=1	Q03529	SCS7	45 kDa		unknown	12309000	0	8607000	0	9862900	0	22404000	0	24251000	-1	19200000	0	21438000	0	42311000	0	30186000	0	1	0	1	0	1	0	1	0	1	0	1	0	1	0	1	0	1	0	13	0	6	0	6	0	11	0
Sideroflexin FSF1 OS=Saccharomyces cerevisiae (strain ATCC 204508 / S288c) OX=559292 GN=FSF1 PE=1 SV=1	Q12029	FSF1	35 kDa		unknown	7306900	0	9871800	0	10076000	0	7736600	0	3389300	0	13503000	0	64704000	0	20502000	0	20329000	-1	1	0.07	1	0	1	0	1	0	1	0	1	0	1	0	1	0	1	0	13	0	15	0	11	0	13	0
Serine/threonine-protein kinase GIN4 OS=Saccharomyces cerevisiae (strain ATCC 204508 / S288c) OX=559292 GN=GIN4 PE=1 SV=1	Q12263	GIN4	130 kDa		unknown	398310	0	601400	0	599480	0	1103500	0	926430	0	1453700	0	1263800	0	1218600	0	939010	0	1	0.27	1	0.09	1	0	1	0.37	1	0	1	0	1	0	1	0.08	1	0.06	6	0	12	0	8	0	14	0
60S ribosomal protein L29 OS=Saccharomyces cerevisiae (strain ATCC 204508 / S288c) OX=559292 GN=RPL29 PE=1 SV=3	P05747	RPL29	7 kDa		unknown	1613400000	145050000	1755800000	1300100000	1667700000	636240000	967790000	370090000	102490000	0	77674000	155310000	195600000	255770000	12198000	552780000	151240000	513980000	1	0.91	1	0.9	1	0.9	1	0.95	0.85	0.12	0.88	0.84	1	0.85	0.9	0.81	1	0.87	15	1	18	3	16	3	13	3
Protein CAF40 OS=Saccharomyces cerevisiae (strain ATCC 204508 / S288c) OX=559292 GN=CAF40 PE=1 SV=1	P53829	CAF40	41 kDa		unknown	8807700	0	9437700	-1	4133900	-1	12460000	-1	10243000	-1	10497000	0	10402000	0	3523300	-1	12497000	-1	1	0	1	0	1	0	1	0	1	0	1	0	1	0	0.97	0	1	0	14	0	17	0	8	0	16	0
Protein EFR3 OS=Saccharomyces cerevisiae (strain ATCC 204508 / S288c) OX=559292 GN=EFR3 PE=1 SV=1	Q03653	EFR3	89 kDa		unknown	1254400	0	1365800	0	1444200	0	1050000	0	4011300	0	4776700	0	2437700	0	2884800	0	1883200	0	1	0	1	0	1	0	1	0	1	0.07	1	0	1	0	1	0	1	0	13	0	10	0	11	0	8	0
GPI transamidase component GPI17 OS=Saccharomyces cerevisiae (strain ATCC 204508 / S288c) OX=559292 GN=GPI17 PE=1 SV=1	Q04080	GPI17	61 kDa		unknown	2618500	0	3907000	0	2907800	0	20714000	0	5886300	0	10168000	0	6689300	0	17403000	0	10014000	0	1	0.1	1	0	1	0	1	0	1	0	1	0	1	0	1	0	1	0	12	0	11	0	8	0	17	0
GPN-loop GTPase 2 OS=Saccharomyces cerevisiae (strain ATCC 204508 / S288c) OX=559292 GN=GPN2 PE=1 SV=1	Q08726	GPN2	40 kDa		unknown	5764800	0	4033000	0	7532000	0	12874000	0	7786300	0	10654000	0	8075700	0	13146000	0	14723000	-1	1	0	1	0	1	0	1	0.19	1	0	1	0	1	0	1	0	1	0	15	0	11	0	14	0	13	0
37S ribosomal protein MRP1, mitochondrial OS=Saccharomyces cerevisiae (strain ATCC 204508 / S288c) OX=559292 GN=MRP1 PE=1 SV=2	P10662	MRP1	37 kDa		unknown	6166700	0	8265000	0	14625000	0	10478000	0	17448000	0	17392000	0	10053000	-1	23071000	0	18165000	0	1	0	1	0.25	1	0	1	0	1	0	1	0	1	0	1	0	1	0	9	0	15	0	12	0	10	0
V-type proton ATPase subunit C OS=Saccharomyces cerevisiae (strain ATCC 204508 / S288c) OX=559292 GN=VMA5 PE=1 SV=4	P31412	VMA5	44 kDa		unknown	5948300	0	5993600	0	9028800	0	8401200	0	5675100	0	4209800	-1	2427700	0	7608100	0	2269000	-1	1	0.08	1	0	1	0	1	0	1	0	1	0	1	0	1	0	1	0	13	0	17	0	14	0	15	0
Ribosome biogenesis protein RPF2 OS=Saccharomyces cerevisiae (strain ATCC 204508 / S288c) OX=559292 GN=RPF2 PE=1 SV=1	P36160	RPF2	40 kDa		unknown	12749000	0	15557000	0	12129000	0	14345000	0	22727000	0	18714000	0	15182000	0	30463000	-1	15952000	0	1	0.25	1	0.05	1	0	1	0.1	1	0	1	0.11	1	0	1	0	1	0	12	0	12	0	7	0	8	0
AP-3 complex subunit mu OS=Saccharomyces cerevisiae (strain ATCC 204508 / S288c) OX=559292 GN=APM3 PE=1 SV=2	P38153	APM3	55 kDa		unknown	2273600	0	1980000	0	2480000	0	1565600	0	6949700	0	7868200	0	7058100	0	6616600	0	4691100	0	1	0	1	0	1	0	1	0	1	0	1	0	1	0	1	0	1	0	11	0	10	0	10	0	4	0
Serine/threonine-protein kinase RIO2 OS=Saccharomyces cerevisiae (strain ATCC 204508 / S288c) OX=559292 GN=RIO2 PE=1 SV=1	P40160	RIO2	49 kDa		unknown	4088900	0	3739200	0	5050200	0	7747700	0	11354000	0	6624500	0	6487800	0	12259000	0	9484700	0	1	0	1	0	1	0	1	0	1	0	1	0	1	0	1	0	1	0	13	0	10	0	11	0	14	0
Ribose-phosphate pyrophosphokinase 5 OS=Saccharomyces cerevisiae (strain ATCC 204508 / S288c) OX=559292 GN=PRS5 PE=1 SV=1	Q12265	PRS5	54 kDa		unknown	2473400	0	3614500	0	3494200	0	3550200	0	9935900	0	8241800	0	4155600	0	8590200	0	5578000	0	1	0	1	0	1	0	1	0	1	0	1	0	1	0	1	0	1	0	10	0	12	0	9	0	7	0
Exocyst complex component SEC3 OS=Saccharomyces cerevisiae (strain ATCC 204508 / S288c) OX=559292 GN=SEC3 PE=1 SV=1	P33332	SEC3	155 kDa		unknown	53769	0	0	0	55507	0	519220	0	1243900	-1	1195500	0	728550	0	1362600	0	643040	0	1	0	1	0.13	1	0	1	0	1	0	1	0	1	0	1	0	1	0	5	0	2	0	4	0	10	0
54S ribosomal protein L8, mitochondrial OS=Saccharomyces cerevisiae (strain ATCC 204508 / S288c) OX=559292 GN=MRPL8 PE=1 SV=4	P22353	MRPL8	27 kDa		unknown	4336200	0	6028400	0	17207000	0	10709000	0	12046000	0	11299000	0	20804000	0	18011000	0	11647000	0	1	0	1	0	1	0	1	0	1	0	1	0.08	1	0.12	1	0.07	1	0	9	0	12	0	14	0	14	0
ATP-dependent RNA helicase DBP7 OS=Saccharomyces cerevisiae (strain ATCC 204508 / S288c) OX=559292 GN=DBP7 PE=1 SV=1	P36120	DBP7	83 kDa		unknown	2686500	0	1404200	0	1448000	0	1932500	0	2588800	0	2513500	0	3250500	0	2969500	0	1763700	0	1	0	1	0	1	0	1	0.15	1	0	1	0	1	0	1	0	1	0	16	0	10	0	8	0	9	0
Poly(A) ribonuclease POP2 OS=Saccharomyces cerevisiae (strain ATCC 204508 / S288c) OX=559292 GN=POP2 PE=1 SV=2	P39008	POP2	50 kDa		unknown	11457000	0	7709400	0	7397900	-1	9433400	0	11699000	0	12036000	0	12203000	0	9356900	0	9580000	-1	1	0	1	0	1	0	1	0	1	0	1	0	1	0	1	0	1	0	9	0	14	0	13	0	10	0
Mitochondrial respiratory chain complexes assembly protein AFG3 OS=Saccharomyces cerevisiae (strain ATCC 204508 / S288c) OX=559292 GN=AFG3 PE=1 SV=1	P39925	AFG3	85 kDa	TRUE	unknown	737950	85288000	1201400	20110000	1724600	0	5408400	0	3277300	0	1151500	0	1710300	0	4396700	0	287110	36591000	0.99	0.19	1	0.05	1	0.15	1	0.14	1	0	1	0	1	0	1	0	1	0.12	5	1	7	2	8	1	14	0
Cluster of Histone H2A.1 OS=Saccharomyces cerevisiae (strain ATCC 204508 / S288c) OX=559292 GN=HTA1 PE=1 SV=2 (P04911)	P04911 [2]	HTA1	14 kDa	TRUE	unknown	316130000	0	494470000	0	103710000	0	0	0	0	0	0	0	0	0	0	0	121640000	0	1	0	1	0	1	0	1	0	1	0	1	0	1	0.06	1	0	1	0	15	0	21	0	16	0	14	0
Ribonucleoside-diphosphate reductase small chain 2 OS=Saccharomyces cerevisiae (strain ATCC 204508 / S288c) OX=559292 GN=RNR4 PE=1 SV=1	P49723	RNR4	40 kDa		unknown	3609300	0	2920300	0	1798500	-1	3339300	0	6596600	0	7846700	0	4402300	0	6040100	15856000	6318200	0	1	0	1	0	1	0	1	0	1	0	1	0	1	0	1	0.4	1	0	10	0	13	0	12	0	9	0
Uncharacterized protein YGR266W OS=Saccharomyces cerevisiae (strain ATCC 204508 / S288c) OX=559292 GN=YGR266W PE=1 SV=1	P53326	YGR266W	81 kDa		unknown	2075800	0	1457400	0	1324200	0	376050	0	3093700	-1	2062700	-1	1370500	0	2871500	0	1801200	0	1	0	1	0	1	0	0.99	0	1	0	1	0	1	0	1	0	1	0	11	0	8	0	8	0	2	0
Inner nuclear membrane protein HEH2 OS=Saccharomyces cerevisiae (strain ATCC 204508 / S288c) OX=559292 GN=HEH2 PE=1 SV=1	Q03281	HEH2	76 kDa		unknown	1237200	0	1112800	0	1974300	-1	5278900	0	3352300	0	2549500	0	2143500	0	1940600	0	3263200	0	1	0.6	1	0	1	0	1	0.33	1	0	1	0	1	0	1	0	1	0	14	0	11	0	9	0	16	0
Actin-related protein 2 OS=Saccharomyces cerevisiae (strain ATCC 204508 / S288c) OX=559292 GN=ARP2 PE=1 SV=1	P32381	ARP2	44 kDa		unknown	4459200	0	5266900	0	1671800	0	3950800	0	11572000	0	10851000	0	8261600	0	14197000	0	14271000	0	1	0	1	0	1	0	1	0	1	0	1	0	1	0	1	0	1	0.08	8	0	9	0	5	0	8	0
Replication factor C subunit 4 OS=Saccharomyces cerevisiae (strain ATCC 204508 / S288c) OX=559292 GN=RFC4 PE=1 SV=1	P40339	RFC4	36 kDa		unknown	5362600	0	4754100	0	2171500	0	2024200	0	2840700	0	8897400	0	4631900	0	9924700	0	5333200	0	1	0	1	0	1	0	1	0	1	0	1	0	1	0	1	0	1	0	21	0	15	0	8	0	6	0
Acetyl-CoA acetyltransferase OS=Saccharomyces cerevisiae (strain ATCC 204508 / S288c) OX=559292 GN=ERG10 PE=1 SV=3	P41338	ERG10	42 kDa		unknown	1435300	0	2029600	0	1397100	0	2825300	0	6212600	0	5020400	0	16442000	-1	2738900	0	6789600	0	1	0	1	0	1	0	1	0	1	0	1	0	1	0	1	0	1	0	10	0	6	0	8	0	13	0
Choline kinase OS=Saccharomyces cerevisiae (strain ATCC 204508 / S288c) OX=559292 GN=CKI1 PE=1 SV=1	P20485	CKI1	66 kDa		unknown	957020	0	1313900	0	4500400	0	2871800	0	3944400	0	6855600	0	1265900	0	8759300	0	5934400	0	1	0	1	0	1	0	1	0	1	0	1	0	1	0	1	0	1	0.24	8	0	7	0	14	0	9	0
Inorganic phosphate transporter PHO84 OS=Saccharomyces cerevisiae (strain ATCC 204508 / S288c) OX=559292 GN=PHO84 PE=1 SV=2	P25297	PHO84	64 kDa		unknown	114900	0	0	0	11920000	0	56279000	-1	49085000	0	2502800	0	13877000	0	5077400	-1	17274000	-1	0.96	0	0.13	0	1	0	1	0	1	0	1	0	1	0.24	0.97	0	1	0	1	0	0	0	12	0	31	0
Vacuolar protein sorting-associated protein 35 OS=Saccharomyces cerevisiae (strain ATCC 204508 / S288c) OX=559292 GN=VPS35 PE=1 SV=2	P34110	VPS35	109 kDa		unknown	620130	0	1062800	0	607770	0	1544100	0	2080300	0	1262300	0	1322900	0	2302400	0	3047600	0	1	0	1	0	1	0	1	0	1	0.06	1	0	1	0	1	0	1	0	6	0	12	0	8	0	9	0
Probable ATP-dependent RNA helicase DHR2 OS=Saccharomyces cerevisiae (strain ATCC 204508 / S288c) OX=559292 GN=DHR2 PE=1 SV=1	P36009	DHR2	83 kDa		unknown	1621400	0	459540	0	0	0	295540	0	1179900	0	3441600	0	2551500	0	3039600	0	2335800	0	1	0.29	1	0.1	0	0.08	1	0.3	1	0	1	0	1	0	1	0.19	1	0	17	0	6	0	0	0	2	0
Protein transport protein SEC31 OS=Saccharomyces cerevisiae (strain ATCC 204508 / S288c) OX=559292 GN=SEC31 PE=1 SV=3	P38968	SEC31	139 kDa		unknown	434940	0	472100	0	304580	0	503600	0	3466900	0	3614200	0	1371300	0	1283800	0	1530400	0	1	0.13	1	0.07	1	0	1	0	1	0	1	0	1	0	1	0	1	0	6	0	4	0	5	0	5	0
ER membrane protein complex subunit 2 OS=Saccharomyces cerevisiae (strain ATCC 204508 / S288c) OX=559292 GN=EMC2 PE=1 SV=1	P47133	EMC2	34 kDa		unknown	1926200	0	4985500	0	1574800	0	36505000	0	7107700	0	8007600	0	3419900	0	6013200	0	4070600	0	1	0	1	0	1	0	1	0	1	0	1	0	1	0	1	0	1	0	5	0	9	0	6	0	25	0
Hsp90 co-chaperone HCH1 OS=Saccharomyces cerevisiae (strain ATCC 204508 / S288c) OX=559292 GN=HCH1 PE=1 SV=1	P53834	HCH1	17 kDa		unknown	22063000	-1	38386000	-1	62872000	-1	34692000	0	19380000	0	27752000	0	10680000	0	25162000	-1	6739600	-1	1	0	1	0	1	0	1	0	1	0	1	0	1	0	1	0	1	0	12	0	14	0	19	0	13	0
Ribosome biogenesis protein RLP24 OS=Saccharomyces cerevisiae (strain ATCC 204508 / S288c) OX=559292 GN=RLP24 PE=1 SV=1	Q07915	RLP24	24 kDa		unknown	172530000	-1	197120000	46111000	207630000	0	154570000	0	152550000	16472000	153340000	146230000	120450000	91102000	185190000	20173000	135040000	0	1	0	1	0.97	1	0.21	1	0	1	0.96	1	1	1	1	1	0.87	1	0	11	0	12	1	11	0	9	0
General negative regulator of transcription subunit 5 OS=Saccharomyces cerevisiae (strain ATCC 204508 / S288c) OX=559292 GN=NOT5 PE=1 SV=1	Q12514	NOT5	66 kDa	TRUE	unknown	2322700	0	5393100	0	4538900	0	8125900	0	7213200	0	7610200	-1	7095100	0	12711000	0	8615600	0	1	0.05	1	0	1	0	1	0	1	0	1	0	1	0	1	0	1	0	6	0	10	0	9	0	10	0
Cluster of Sodium transport ATPase 1 OS=Saccharomyces cerevisiae (strain ATCC 204508 / S288c) OX=559292 GN=ENA1 PE=1 SV=1 (P13587)	P13587 [2]	ENA1	120 kDa	TRUE	unknown	0	0	398190	0	1309800	0	2044800	0	1170500	0	5141800	0	700200	0	2468800	0	2938400	0	1	0.08	1	0	1	0	1	0	1	0	1	0	1	0	1	0	1	0	8	0	8	0	11	0	9	0
Phenylalanine--tRNA ligase alpha subunit OS=Saccharomyces cerevisiae (strain ATCC 204508 / S288c) OX=559292 GN=FRS2 PE=1 SV=3	P15625	FRS2	58 kDa		unknown	1219700	0	1630200	0	1387600	0	2095300	0	3801600	0	3972800	0	1148700	0	2513800	0	1747600	0	1	0	1	0	1	0	1	0	1	0	1	0	1	0	1	0	1	0	10	0	11	0	12	0	13	0
Vacuolar protein sorting/targeting protein VPS10 OS=Saccharomyces cerevisiae (strain ATCC 204508 / S288c) OX=559292 GN=PEP1 PE=1 SV=1	P32319	PEP1	178 kDa	TRUE	unknown	223340	0	294020	0	594440	0	864750	0	870360	0	1018500	0	877220	0	1967200	0	965070	0	1	0	1	0	0.99	0	1	0	1	0	1	0	1	0	1	0	1	0	6	0	6	0	7	0	10	0
54S ribosomal protein L10, mitochondrial OS=Saccharomyces cerevisiae (strain ATCC 204508 / S288c) OX=559292 GN=MRPL10 PE=1 SV=2	P36520	MRPL10	36 kDa		unknown	6054500	0	4368300	0	7184900	0	10195000	0	6607600	0	4806500	0	8507800	0	7903900	0	9445200	0	1	0	1	0	1	0	1	0	1	0	1	0	1	0	1	0	1	0	11	0	9	0	10	0	15	0
Protein HLJ1 OS=Saccharomyces cerevisiae (strain ATCC 204508 / S288c) OX=559292 GN=HLJ1 PE=1 SV=1	P48353	HLJ1	25 kDa		unknown	12142000	0	11750000	-1	7012600	0	26026000	0	25922000	0	21485000	0	14792000	31693000	36420000	24345000	18091000	52472000	1	0	1	0	1	0	1	0.41	1	0.2	1	0	1	0.82	1	0.81	1	0.64	11	0	6	0	5	0	11	0
Sphingoid long chain base kinase 4 OS=Saccharomyces cerevisiae (strain ATCC 204508 / S288c) OX=559292 GN=LCB4 PE=1 SV=1	Q12246	LCB4	70 kDa		unknown	1344200	0	2004500	0	1117700	0	1662300	0	3891300	0	2100300	0	3462000	0	5383800	0	3127300	0	1	0.06	1	0	1	0	1	0	1	0	1	0	1	0	1	0	1	0	10	0	10	0	8	0	10	0
ATP synthase subunit 4, mitochondrial OS=Saccharomyces cerevisiae (strain ATCC 204508 / S288c) OX=559292 GN=ATP4 PE=1 SV=2	P05626	ATP4	27 kDa		unknown	2073800	0	4021100	0	8934600	0	33919000	0	6545500	0	10410000	0	22637000	0	15220000	0	8832400	0	1	0	1	0	1	0	1	0	1	0.08	1	0	1	0	1	0	1	0	7	0	9	0	10	0	18	0
Protein SST2 OS=Saccharomyces cerevisiae (strain ATCC 204508 / S288c) OX=559292 GN=SST2 PE=1 SV=2	P11972	SST2	80 kDa		unknown	4397500	0	4807600	0	165130	0	1137200	0	470880	0	4361300	0	5267500	0	2170200	0	4065400	0	1	0.76	1	0	1	0	1	0.1	1	0	1	0	1	0	1	0	1	0	17	0	19	0	3	0	6	0
Isopentenyl-diphosphate Delta-isomerase OS=Saccharomyces cerevisiae (strain ATCC 204508 / S288c) OX=559292 GN=IDI1 PE=1 SV=2	P15496	IDI1	33 kDa		unknown	9627900	0	13249000	0	5564500	0	7172000	-1	10204000	0	13550000	-1	0	0	1578700	0	11220000	0	1	0	1	0	1	0	1	0	1	0	1	0	0.96	0	1	0.06	1	0	21	0	24	0	10	0	11	0
Exocyst complex component SEC15 OS=Saccharomyces cerevisiae (strain ATCC 204508 / S288c) OX=559292 GN=SEC15 PE=1 SV=2	P22224	SEC15	105 kDa		unknown	429610	0	571960	0	728750	0	1966600	0	2547600	0	3200300	0	1202500	0	3006100	0	2117500	0	1	0.06	1	0	1	0	1	0	1	0	1	0	1	0	1	0	1	0	6	0	6	0	8	0	11	0
High-affinity glucose transporter HXT2 OS=Saccharomyces cerevisiae (strain ATCC 204508 / S288c) OX=559292 GN=HXT2 PE=1 SV=1	P23585	HXT2	60 kDa	TRUE	unknown	9520100	-1	10985000	-1	7365700	0	12488000	0	13331000	0	13270000	0	8049900	2032400	21505000	0	11592000	0	1	0	1	0	1	0	1	0	1	0	1	0.18	1	0.33	1	0	1	0	12	0	16	0	8	0	9	0
Oligomycin resistance ATP-dependent permease YOR1 OS=Saccharomyces cerevisiae (strain ATCC 204508 / S288c) OX=559292 GN=YOR1 PE=1 SV=1	P53049	YOR1	167 kDa		unknown	7617.4	0	0	0	0	0	498230	0	541040	0	1523700	0	921670	0	1215800	0	772100	0	0.99	0.17	0.86	0	1	0	1	0	1	0	1	0	1	0	1	0	1	0	1	0	1	0	3	0	6	0
Ribosome-interacting GTPase 2 OS=Saccharomyces cerevisiae (strain ATCC 204508 / S288c) OX=559292 GN=RBG2 PE=1 SV=1	P53295	RBG2	41 kDa		unknown	149860	0	519350	0	1440300	0	1676500	0	1731200	0	3864500	0	2107800	0	8626900	0	2600300	0	1	0	1	0	1	0.1	1	0	1	0	1	0	1	0	1	0	1	0	3	0	10	0	6	0	10	0
DNA-directed RNA polymerase II subunit RPB1 OS=Saccharomyces cerevisiae (strain ATCC 204508 / S288c) OX=559292 GN=RPO21 PE=1 SV=2	P04050	RPO21	192 kDa	TRUE	unknown	675270	0	205420	0	479860	0	1328200	0	1432300	0	2391900	0	485700	0	2365200	0	1474200	0	1	0	1	0	1	0	1	0	1	0	1	0	1	0	1	0	1	0.1	13	0	7	0	12	0	13	0
Proteasome subunit beta type-4 OS=Saccharomyces cerevisiae (strain ATCC 204508 / S288c) OX=559292 GN=PRE1 PE=1 SV=2	P22141	PRE1	23 kDa		unknown	10182000	0	10910000	0	15378000	0	11920000	-1	24058000	0	17415000	0	16195000	0	9340400	-1	11961000	-1	1	0	1	0	1	0	1	0	1	0	1	0	1	0	1	0	1	0	11	0	12	0	14	0	9	0
ATP-dependent bile acid permease OS=Saccharomyces cerevisiae (strain ATCC 204508 / S288c) OX=559292 GN=YBT1 PE=1 SV=2	P32386	YBT1	189 kDa	TRUE	unknown	0	0	0	0	119390	0	476060	0	2218500	0	2338700	0	517110	0	1252400	0	640020	5730000	0.06	0	0.99	0	1	0	1	0	1	0	1	0.05	1	0	1	0	1	0.67	0	0	1	0	4	0	9	0
SIT4-associating protein SAP185 OS=Saccharomyces cerevisiae (strain ATCC 204508 / S288c) OX=559292 GN=SAP185 PE=1 SV=1	P40856	SAP185	121 kDa		unknown	1605200	0	2041100	0	1118700	0	1018500	0	1794800	0	1178300	0	1117200	0	1283200	0	1007600	0	1	0	1	0	1	0	1	0	1	0	1	0	1	0	1	0	1	0	13	0	8	0	6	0	6	0
Glycolipid 2-alpha-mannosyltransferase OS=Saccharomyces cerevisiae (strain ATCC 204508 / S288c) OX=559292 GN=KRE2 PE=1 SV=1	P27809	KRE2	51 kDa		unknown	167570	0	262720	0	1066900	0	3254100	-1	3351100	0	4942300	0	4390500	0	7682000	-1	3613600	0	1	0	1	0	1	0	1	0	1	0	1	0	1	0	1	0	1	0	6	0	4	0	8	0	14	0
Protein WHI3 OS=Saccharomyces cerevisiae (strain ATCC 204508 / S288c) OX=559292 GN=WHI3 PE=1 SV=1	P34761	WHI3	71 kDa		unknown	6784200	0	6096300	0	11693000	0	10993000	0	4983500	0	13822000	0	3773000	0	3291600	-1	10135000	0	1	0.09	1	0	1	0.06	1	0.09	1	0	1	0	1	0	1	0	1	0	10	0	10	0	15	0	11	0
Probable alpha-1,6-mannosyltransferase MNN10 OS=Saccharomyces cerevisiae (strain ATCC 204508 / S288c) OX=559292 GN=MNN10 PE=1 SV=1	P50108	MNN10	47 kDa		unknown	246630	0	6183100	0	2551400	0	30055000	0	7230900	0	8295600	0	6075100	0	8901000	0	2885400	0	0.96	0	1	0	1	0	1	0	1	0	1	0	1	0	1	0	1	0	1	0	13	0	7	0	15	0
Uncharacterized RNA-binding protein YGR250C OS=Saccharomyces cerevisiae (strain ATCC 204508 / S288c) OX=559292 GN=YGR250C PE=1 SV=1	P53316	YGR250C	90 kDa		unknown	963910	0	771470	0	1082500	0	2989000	0	1418500	0	2114600	0	2380000	0	3048900	0	1424800	0	1	0.44	1	0.06	1	0	1	0.36	1	0	1	0	1	0	1	0	1	0.13	9	0	7	0	8	0	11	0
Vacuolar protein sorting-associated protein 30 OS=Saccharomyces cerevisiae (strain ATCC 204508 / S288c) OX=559292 GN=VPS30 PE=1 SV=1	Q02948	VPS30	63 kDa		unknown	22171000	287580000	102080000	462780000	246210000	245260000	38983000	365100000	39977000	391490000	402540000	106660000	56273000	178320000	427410000	563790000	247880000	277890000	0.37	0.78	1	0.46	0.37	0.46	0.47	0.97	0.34	0.51	0.4	0.86	0.38	0.33	0.44	0.84	1	0.56	4	5	6	6	6	5	5	4
Inorganic pyrophosphatase OS=Saccharomyces cerevisiae (strain ATCC 204508 / S288c) OX=559292 GN=IPP1 PE=1 SV=4	P00817	IPP1	32 kDa		unknown	6290200	0	7279700	0	4786500	0	6626500	0	6321900	-1	5557300	-1	2578800	-1	5137800	0	6138100	0	1	0	1	0	1	0	1	0	1	0	1	0	1	0	1	0	1	0	20	0	15	0	7	0	8	0
Phosphatidyl-N-methylethanolamine N-methyltransferase OS=Saccharomyces cerevisiae (strain ATCC 204508 / S288c) OX=559292 GN=OPI3 PE=1 SV=1	P05375	OPI3	23 kDa		unknown	3972500	0	7271200	-1	22418000	-1	25146000	0	14215000	0	51523000	0	37731000	0	41596000	-1	42626000	0	1	0	1	0	1	0	1	0	1	0	1	0	1	0	1	0	1	0	6	0	9	0	11	0	7	0
DNA damage response protein kinase DUN1 OS=Saccharomyces cerevisiae (strain ATCC 204508 / S288c) OX=559292 GN=DUN1 PE=1 SV=1	P39009	DUN1	59 kDa		unknown	1703300	0	1268600	0	1059600	0	792380	0	1490200	0	1858800	-1	1369300	0	4460900	0	2722200	0	1	0	1	0	1	0	1	0	1	0	1	0	1	0	1	0	1	0.06	16	0	12	0	6	0	7	0
Aspartokinase OS=Saccharomyces cerevisiae (strain ATCC 204508 / S288c) OX=559292 GN=HOM3 PE=1 SV=2	P10869	HOM3	58 kDa		unknown	246610	0	1173500	0	3359600	0	1470400	0	3332500	0	4235200	0	773410	0	5040300	0	3233500	0	1	0	1	0	1	0	1	0	1	0	1	0	1	0	1	0	1	0	9	0	8	0	9	0	4	0
Small COPII coat GTPase SAR1 OS=Saccharomyces cerevisiae (strain ATCC 204508 / S288c) OX=559292 GN=SAR1 PE=1 SV=1	P20606	SAR1	21 kDa		unknown	9656700	0	10072000	0	12481000	0	15257000	0	6182900	-1	19431000	0	21555000	0	23048000	0	20380000	0	1	0	1	0	1	0	1	0.08	1	0	1	0	1	0	1	0	1	0	9	0	9	0	9	0	8	0
DNA repair and recombination protein RDH54 OS=Saccharomyces cerevisiae (strain ATCC 204508 / S288c) OX=559292 GN=RDH54 PE=1 SV=4	P38086	RDH54	108 kDa		unknown	361610	0	575150	0	181730	0	948790	0	714850	0	2470600	0	1777700	0	845110	0	1208000	0	1	0	1	0.23	1	0	1	0.06	1	0	1	0	1	0	1	0	1	0	5	0	6	0	4	0	9	0
Branched-chain-amino-acid aminotransferase, mitochondrial OS=Saccharomyces cerevisiae (strain ATCC 204508 / S288c) OX=559292 GN=BAT1 PE=1 SV=1	P38891	BAT1	44 kDa	TRUE	unknown	2817100	0	3107900	0	5685200	-1	3052900	0	12357000	0	7035800	0	1322000	0	13981000	0	6766300	-1	1	0	1	0	1	0	1	0	1	0	1	0	1	0.61	1	0	1	0	9	0	9	0	12	0	9	0
YAP1-binding protein 2 OS=Saccharomyces cerevisiae (strain ATCC 204508 / S288c) OX=559292 GN=YBP2 PE=1 SV=1	P53169	YBP2	73 kDa		unknown	1041900	0	1399000	0	2670200	0	2418700	0	1810100	0	3685500	0	1177100	0	4832800	0	3416000	0	1	0.43	1	0.19	1	0	1	0.06	1	0	1	0	1	0	1	0	1	0	8	0	8	0	13	0	13	0
Lysophosphatidic acid:oleoyl-CoA acyltransferase 1 OS=Saccharomyces cerevisiae (strain ATCC 204508 / S288c) OX=559292 GN=LOA1 PE=1 SV=1	Q06508	LOA1	34 kDa		unknown	6855500	0	8996800	-1	8553100	0	10726000	0	8350800	-1	16964000	0	17763000	0	20108000	0	20808000	-1	1	0.1	1	0	1	0	1	0	1	0	1	0	1	0	1	0	1	0	12	0	10	0	10	0	9	0
Bud site selection protein 20 OS=Saccharomyces cerevisiae (strain ATCC 204508 / S288c) OX=559292 GN=BUD20 PE=1 SV=1	Q08004	BUD20	19 kDa		unknown	20174000	0	25721000	-1	25067000	0	20754000	-1	10503000	-1	17569000	0	35243000	-1	57174000	0	19311000	0	1	0	1	0	1	0	1	0	1	0	1	0	1	0	1	0	1	0	14	0	19	0	14	0	9	0
DNA-directed RNA polymerase III subunit RPC6 OS=Saccharomyces cerevisiae (strain ATCC 204508 / S288c) OX=559292 GN=RPC34 PE=1 SV=1	P32910	RPC34	36 kDa		unknown	4828200	0	5003300	0	5446600	0	6183200	0	12183000	0	6915200	0	6560700	0	17336000	0	7731700	0	1	0	1	0	0.96	0	1	0	1	0	1	0.07	1	0	1	0	1	0	10	0	9	0	4	0	5	0
ARF guanine-nucleotide exchange factor 1 OS=Saccharomyces cerevisiae (strain ATCC 204508 / S288c) OX=559292 GN=GEA1 PE=1 SV=1	P47102	GEA1	159 kDa	TRUE	unknown	577940	0	170690	0	807740	0	1167200	0	158670	0	684730	0	287340	0	2190700	0	568590	0	1	0.2	1	0	1	0	1	0.06	1	0	1	0	1	0	1	0	1	0	10	0	5	0	8	0	13	0
Nucleoporin NUP84 OS=Saccharomyces cerevisiae (strain ATCC 204508 / S288c) OX=559292 GN=NUP84 PE=1 SV=1	P52891	NUP84	84 kDa		unknown	2345000	0	2565000	0	1164000	0	2302300	0	3130200	0	2764300	3624600	3853300	0	3850900	0	2029600	0	1	0	1	0	1	0	1	0	1	0	1	0.36	1	0	1	0	1	0	9	0	11	0	6	0	11	0
Sterol O-acyltransferase 2 OS=Saccharomyces cerevisiae (strain ATCC 204508 / S288c) OX=559292 GN=ARE2 PE=1 SV=1	P53629	ARE2	74 kDa		unknown	6404900	0	9550800	0	11370000	0	14055000	0	15997000	0	8628500	0	9915900	2493100	17099000	0	7024700	0	1	0	1	0	1	0	1	0	1	0	1	0.24	1	0.95	1	0	1	0	12	0	12	0	11	0	7	0
54S ribosomal protein L22, mitochondrial OS=Saccharomyces cerevisiae (strain ATCC 204508 / S288c) OX=559292 GN=MRPL22 PE=1 SV=2	P53881	MRPL22	35 kDa		unknown	3902600	-1	4621100	-1	6945800	-1	9646000	-1	11183000	0	10950000	0	6699200	0	9352800	-1	6497900	0	1	0	1	0	1	0	1	0	1	0	1	0	1	0	1	0	1	0	11	0	8	0	11	0	10	0
Protein NSG2 OS=Saccharomyces cerevisiae (strain ATCC 204508 / S288c) OX=559292 GN=NSG2 PE=1 SV=1	P53898	NSG2	34 kDa		unknown	12216000	-1	9496600	-1	7135700	-1	17021000	-1	18495000	-1	18474000	0	14949000	0	13671000	0	12776000	0	1	0	1	0	1	0	1	0	1	0	1	0	1	0.16	1	0	1	0	11	0	7	0	6	0	13	0
Uncharacterized protein RSN1 OS=Saccharomyces cerevisiae (strain ATCC 204508 / S288c) OX=559292 GN=RSN1 PE=1 SV=1	Q03516	RSN1	108 kDa		unknown	2100000	0	2925100	0	379670	0	1047500	0	1573500	0	4910300	0	2843100	0	18011000	0	8915500	0	1	0	1	0	1	0	1	0	1	0	1	0	1	0	1	0	1	0	10	0	14	0	5	0	6	0
Vacuolar protein sorting-associated protein 29 OS=Saccharomyces cerevisiae (strain ATCC 204508 / S288c) OX=559292 GN=VPS29 PE=1 SV=1	P38759	VPS29	31 kDa		unknown	7852000	0	8543600	0	5057000	0	9154100	0	12220000	0	15080000	0	12035000	0	9555400	0	15104000	0	1	0	1	0	1	0	1	0	1	0	1	0	1	0	1	0	1	0	13	0	13	0	8	0	9	0
DnaJ protein homolog XDJ1 OS=Saccharomyces cerevisiae (strain ATCC 204508 / S288c) OX=559292 GN=XDJ1 PE=1 SV=2	P39102	XDJ1	51 kDa		unknown	1731400	0	1258600	-1	1129700	0	1112700	0	3591200	0	1581000	0	352350	0	1181600	0	3645800	0	1	0	1	0	1	0	1	0	1	0	1	0	1	0	1	0	1	0	15	0	7	0	10	0	12	0
Proteasome activator BLM10 OS=Saccharomyces cerevisiae (strain ATCC 204508 / S288c) OX=559292 GN=BLM10 PE=1 SV=2	P43583	BLM10	246 kDa		unknown	0	0	256940	0	0	0	56565	0	1124800	0	712750	0	55071	0	568050	0	319680	0	1	0.17	1	0	1	0	1	0.08	1	0	1	0	1	0	1	0.1	1	0	2	0	5	0	3	0	2	0
GTP-binding protein YPT1 OS=Saccharomyces cerevisiae (strain ATCC 204508 / S288c) OX=559292 GN=YPT1 PE=1 SV=2	P01123	YPT1	23 kDa		unknown	7633900	0	3811600	-1	8623500	0	10826000	0	5933700	0	15571000	0	9209000	-1	23448000	0	15606000	29052000	1	0	0.99	0	0.99	0	1	0	1	0	1	0	1	0	1	0	1	0.13	10	0	6	0	8	0	10	0
Zuotin OS=Saccharomyces cerevisiae (strain ATCC 204508 / S288c) OX=559292 GN=ZUO1 PE=1 SV=1	P32527	ZUO1	49 kDa		unknown	4017900	0	4218300	0	3343400	0	4471000	0	7064500	0	5977800	0	6565200	0	9957200	0	3330800	0	1	0	1	0.06	1	0	1	0	1	0	1	0	1	0	1	0.1	1	0	8	0	10	0	7	0	6	0
Mannan polymerase complexes subunit MNN9 OS=Saccharomyces cerevisiae (strain ATCC 204508 / S288c) OX=559292 GN=MNN9 PE=1 SV=3	P39107	MNN9	46 kDa	TRUE	unknown	3834300	0	11369000	0	3986700	0	36697000	0	11446000	0	10215000	0	7868900	0	11468000	0	6907100	0	1	0.14	1	0	1	0	1	0	1	0	1	0	1	0	1	0	1	0.1	8	0	10	0	8	0	14	0
Protein EMP47 OS=Saccharomyces cerevisiae (strain ATCC 204508 / S288c) OX=559292 GN=EMP47 PE=1 SV=1	P43555	EMP47	50 kDa		unknown	10653000	0	20933000	0	24813000	0	8236000	0	7118100	0	18914000	0	5508600	0	10621000	0	9155100	0	1	0.09	1	0	1	0.11	1	0.08	1	0	1	0.09	1	0	1	0	1	0.31	9	0	9	0	8	0	12	0
Importin subunit alpha OS=Saccharomyces cerevisiae (strain ATCC 204508 / S288c) OX=559292 GN=SRP1 PE=1 SV=1	Q02821	SRP1	60 kDa		unknown	2991600	0	4273200	0	4128600	0	6843100	0	9605100	-1	3620000	-1	5537900	0	306070000	0	4864000	0	1	0	1	0	1	0	1	0	1	0	1	0	1	0	1	0	1	0	9	0	8	0	7	0	8	0
Putative uridine kinase DAS2 OS=Saccharomyces cerevisiae (strain ATCC 204508 / S288c) OX=559292 GN=DAS2 PE=1 SV=1	Q12084	DAS2	27 kDa		unknown	6604300	0	3072000	0	14331000	0	20904000	0	12632000	0	21385000	-1	9958100	-1	32685000	-1	24920000	0	1	0	1	0	1	0	1	0	1	0	1	0	1	0	1	0	1	0	8	0	3	0	9	0	10	0
Chromatin-remodeling ATPase INO80 OS=Saccharomyces cerevisiae (strain ATCC 204508 / S288c) OX=559292 GN=INO80 PE=1 SV=1	P53115	INO80	171 kDa		unknown	454440	0	966540	0	363110	0	2058600	0	862200	11643000	2260500	0	462280	0	710420	0	1220500	0	1	0.7	1	0.68	1	0	1	0	1	0.58	1	0.33	1	0.2	1	0	1	0	6	0	8	0	4	0	13	0
Exocyst complex component SEC5 OS=Saccharomyces cerevisiae (strain ATCC 204508 / S288c) OX=559292 GN=SEC5 PE=1 SV=1	P89102	SEC5	112 kDa		unknown	549660	0	198500	0	393360	0	567530	0	903490	0	1419700	0	673950	0	1475300	0	815320	0	1	0	1	0	1	0	1	0	1	0	1	0	1	0	1	0	1	0.84	7	0	9	0	9	0	7	0
Vacuolar protein sorting-associated protein 13 OS=Saccharomyces cerevisiae (strain ATCC 204508 / S288c) OX=559292 GN=VPS13 PE=1 SV=1	Q07878	VPS13	358 kDa		unknown	0	0	62380	0	59933	0	46103	0	1053600	0	99525	0	246630	244710	550550	0	204560	0	1	0.81	0.99	0.74	1	0.33	1	0.41	1	0.26	1	0.52	1	0.43	1	0.12	1	0.97	2	1	2	0	4	0	4	0
Ubiquitin-conjugating enzyme E2-34 kDa OS=Saccharomyces cerevisiae (strain ATCC 204508 / S288c) OX=559292 GN=CDC34 PE=1 SV=1	P14682	CDC34	34 kDa		unknown	13973000	-1	14557000	0	10113000	-1	17723000	0	8505800	-1	15151000	0	7793800	0	6489400	0	17984000	-1	1	0	1	0	1	0	1	0	1	0	1	0	1	0	1	0	1	0	10	0	12	0	7	0	15	0
Signal recognition particle receptor subunit beta OS=Saccharomyces cerevisiae (strain ATCC 204508 / S288c) OX=559292 GN=SRP102 PE=1 SV=1	P36057	SRP102	27 kDa		unknown	9527600	0	12169000	-1	11312000	0	9681600	0	8482100	-1	13252000	-1	11181000	0	13722000	0	10237000	0	1	0	1	0	1	0	1	0	1	0	1	0	1	0	1	0	1	0	12	0	9	0	9	0	11	0
Long-chain-fatty-acid--CoA ligase 3 OS=Saccharomyces cerevisiae (strain ATCC 204508 / S288c) OX=559292 GN=FAA3 PE=1 SV=1	P39002	FAA3	78 kDa	TRUE	unknown	4770500	0	6494700	0	3732800	0	439950	0	2846700	-1	3733100	0	5788200	2640200	14619000	0	4499000	0	1	0	1	0	1	0.37	1	0	1	0	1	0	1	0.1	1	0	1	0	13	0	16	0	9	1	5	0
Conserved oligomeric Golgi complex subunit 3 OS=Saccharomyces cerevisiae (strain ATCC 204508 / S288c) OX=559292 GN=COG3 PE=1 SV=1	P40094	COG3	93 kDa		unknown	30238	0	0	0	482840	0	416130	0	2336900	3892800	1641600	0	960210	0	1918800	0	1027500	0	1	0.23	0.96	0	1	0.11	1	0.74	1	0.61	1	0.08	1	0.31	1	0.15	1	0.18	5	0	3	0	10	0	7	0
Actin-like protein ARP9 OS=Saccharomyces cerevisiae (strain ATCC 204508 / S288c) OX=559292 GN=ARP9 PE=1 SV=1	Q05123	ARP9	53 kDa		unknown	1223700	0	2509600	-1	2839900	0	2963100	-1	5615500	0	3709300	-1	2140600	0	4694500	-1	2672300	0	1	0.05	1	0	1	0	1	0	1	0	1	0	1	0	1	0	1	0	5	0	10	0	9	0	8	0
GDP-Man:Man(3)GlcNAc(2)-PP-Dol alpha-1,2-mannosyltransferase OS=Saccharomyces cerevisiae (strain ATCC 204508 / S288c) OX=559292 GN=ALG11 PE=1 SV=1	P53954	ALG11	63 kDa		unknown	933100	1611200	1832900	0	2183700	0	2091400	0	1721000	0	2826200	0	1918700	0	5342100	0	2276300	0	1	0.33	1	0	1	0	1	0	1	0	1	0	1	0	1	0	1	0	6	1	10	0	7	0	7	0
DNA-directed RNA polymerase I subunit RPA49 OS=Saccharomyces cerevisiae (strain ATCC 204508 / S288c) OX=559292 GN=RPA49 PE=1 SV=2	Q01080	RPA49	47 kDa		unknown	4922300	0	5181500	0	1487200	-1	3363400	0	3518800	0	5337700	0	6395300	0	4026100	0	3340900	0	1	0	1	0.11	1	0	1	0.09	1	0	1	0.07	1	0	1	0	1	0	12	0	14	0	5	0	9	0
37S ribosomal protein RSM28, mitochondrial OS=Saccharomyces cerevisiae (strain ATCC 204508 / S288c) OX=559292 GN=RSM28 PE=1 SV=2	Q03430	RSM28	41 kDa		unknown	5204100	0	4278200	0	5488000	0	4848600	0	3927200	-1	4688000	0	9438800	0	4244300	0	6788900	-1	1	0	1	0	1	0	1	0	1	0	1	0	1	0	1	0	1	0	9	0	12	0	11	0	10	0
Sulfate adenylyltransferase OS=Saccharomyces cerevisiae (strain ATCC 204508 / S288c) OX=559292 GN=MET3 PE=1 SV=2	P08536	MET3	58 kDa		unknown	1059400	0	924980	0	4082700	0	5608100	0	6594900	0	9335000	-1	10742000	1071100	5828200	-1	2155700	0	1	0	1	0	1	0	1	0.06	1	0	1	0	1	0.37	1	0	1	0	10	0	5	0	7	0	8	0
Peroxiredoxin AHP1 OS=Saccharomyces cerevisiae (strain ATCC 204508 / S288c) OX=559292 GN=AHP1 PE=1 SV=4	P38013	AHP1	19 kDa		unknown	13369000	0	11436000	0	17817000	0	15142000	0	23107000	0	13231000	-1	15980000	0	31735000	-1	16622000	0	1	0.14	1	0	1	0	1	0	1	0	1	0	1	0	1	0	1	0	12	0	10	0	12	0	8	0
37S ribosomal protein S7, mitochondrial OS=Saccharomyces cerevisiae (strain ATCC 204508 / S288c) OX=559292 GN=RSM7 PE=1 SV=1	P47150	RSM7	28 kDa		unknown	6985500	0	5446400	0	12674000	0	5978700	0	2435700	0	3040900	0	5163800	0	5671600	0	7512100	0	1	0	1	0	1	0	1	0.49	1	0	1	0	1	0	1	0	1	0	12	0	13	0	17	0	11	0
Histone H3 OS=Saccharomyces cerevisiae (strain ATCC 204508 / S288c) OX=559292 GN=HHT1 PE=1 SV=2	P61830	HHT1	15 kDa		unknown	295650000	31635000000	293440000	238500000	431540000	429300000	246940000	394370000	128020000	656380000	217550000	193480000	110620000	218520000	117770000	209090000	43786000	330070000	1	1	1	0.61	1	0.99	1	0.66	1	0.6	1	0.37	1	0.33	0.45	0.46	1	0.92	9	12	9	3	12	4	5	3
37S ribosomal protein S5, mitochondrial OS=Saccharomyces cerevisiae (strain ATCC 204508 / S288c) OX=559292 GN=MRPS5 PE=1 SV=1	P33759	MRPS5	35 kDa		unknown	8836600	0	6916300	0	23688000	0	10038000	0	16346000	0	10776000	0	13057000	4492900	14830000	0	15077000	0	1	0	1	0	1	0	1	0.07	1	0	1	0	1	0.37	1	0	1	0	9	0	10	0	13	0	10	0
ER-retained PMA1-suppressing protein 1 OS=Saccharomyces cerevisiae (strain ATCC 204508 / S288c) OX=559292 GN=EPS1 PE=1 SV=1	P40557	EPS1	81 kDa		unknown	0	-1	0	0	139690	0	1404600	0	3096800	0	1569000	0	1972300	0	4137500	0	2077500	0	0	0	0	0	1	0	1	0	1	0	1	0	1	0	1	0.08	1	0	0	0	0	0	3	0	7	0
54S ribosomal protein L49, mitochondrial OS=Saccharomyces cerevisiae (strain ATCC 204508 / S288c) OX=559292 GN=MRPL49 PE=1 SV=2	P40858	MRPL49	18 kDa		unknown	8897400	0	13672000	0	8716100	0	7663500	0	24981000	0	10691000	0	16068000	0	7913900	0	11709000	0	1	0	1	0	1	0	1	0	1	0	1	0	1	0	1	0	1	0	9	0	12	0	6	0	11	0
Chromatin structure-remodeling complex subunit RSC9 OS=Saccharomyces cerevisiae (strain ATCC 204508 / S288c) OX=559292 GN=RSC9 PE=1 SV=1	Q03124	RSC9	65 kDa		unknown	2052700	0	2567600	0	1524200	0	2031300	0	1571600	0	1852300	0	1919600	0	1437100	0	1448100	1045100000	1	0	1	0	1	0	1	0	1	0	1	0	1	0	1	0	1	0.6	14	0	15	0	6	0	8	0
Putative methyltransferase YMR310C OS=Saccharomyces cerevisiae (strain ATCC 204508 / S288c) OX=559292 GN=YMR310C PE=1 SV=1	Q04867	YMR310C	36 kDa		unknown	5279600	0	3396500	0	3153700	0	7421800	0	3401600	0	16536000	0	11196000	0	6341300	0	5888600	0	1	0	1	0	1	0	1	0	1	0	1	0	1	0	1	0	1	0	12	0	5	0	6	0	9	0
Peptidyl-prolyl cis-trans isomerase OS=Saccharomyces cerevisiae (strain ATCC 204508 / S288c) OX=559292 GN=CPR1 PE=1 SV=3	P14832	CPR1	17 kDa	TRUE	unknown	34868000	0	26320000	0	26507000	0	33474000	0	10511000	0	15213000	0	13015000	0	31333000	0	14623000	0	1	0.67	1	0	1	0	1	0	1	0	1	0	1	0	1	0	1	0	15	0	11	0	9	0	10	0
Translocation protein SEC62 OS=Saccharomyces cerevisiae (strain ATCC 204508 / S288c) OX=559292 GN=SEC62 PE=1 SV=2	P21825	SEC62	31 kDa		unknown	18674000	0	15625000	0	20055000	0	18869000	0	15987000	0	18764000	0	17994000	0	34448000	0	13549000	0	1	0	1	0	1	0	1	0	1	0	1	0.06	1	0	1	0	1	0	15	0	10	0	11	0	8	0
Intracellular protein transport protein USO1 OS=Saccharomyces cerevisiae (strain ATCC 204508 / S288c) OX=559292 GN=USO1 PE=1 SV=2	P25386	USO1	206 kDa		unknown	95260	21949000	63645	0	55392	0	169300	0	923380	0	772070	0	167370	752870	233680	0	265780	0	1	1	1	0	0.99	0.07	1	0.99	1	0.42	1	0.08	1	0.95	1	0.98	1	0.16	6	4	8	0	2	0	2	1
Nuclear protein STH1/NPS1 OS=Saccharomyces cerevisiae (strain ATCC 204508 / S288c) OX=559292 GN=STH1 PE=1 SV=1	P32597	STH1	157 kDa	TRUE	unknown	831640	0	1033400	0	0	0	687530	0	739280	0	973190	0	405680	0	693920	0	460060	0	1	0	1	0.16	1	0	1	0	1	0	1	0.15	1	0	1	0	1	0.25	9	0	13	0	8	0	8	0
Protein CASP OS=Saccharomyces cerevisiae (strain ATCC 204508 / S288c) OX=559292 GN=COY1 PE=1 SV=2	P34237	COY1	78 kDa		unknown	596560	0	352480	0	559080	0	1118500	0	905030	0	812800	0	1425000	0	395560	0	592720	0	1	0.22	1	0.11	1	0.67	1	0.48	1	0	1	0	1	0	1	0	1	0	9	0	5	0	4	1	8	0
18S rRNA (guanine(1575)-N(7))-methyltransferase OS=Saccharomyces cerevisiae (strain ATCC 204508 / S288c) OX=559292 GN=BUD23 PE=1 SV=1	P25627	BUD23	31 kDa		unknown	21597000	0	36588000	0	15688000	0	11021000	-1	37983000	-1	49682000	-1	41347000	0	65679000	0	29782000	0	1	0	1	0	1	0	1	0	1	0	1	0	1	0	1	0	1	0	12	0	13	0	5	0	5	0
26S proteasome regulatory subunit RPN12 OS=Saccharomyces cerevisiae (strain ATCC 204508 / S288c) OX=559292 GN=RPN12 PE=1 SV=3	P32496	RPN12	32 kDa		unknown	956260	0	4349500	0	3065500	-1	3812700	-1	11890000	-1	8460100	0	9527200	0	10854000	0	6681800	0	1	0	1	0	1	0	1	0	1	0	1	0	1	0	1	0	1	0	5	0	9	0	8	0	5	0
AP-3 complex subunit beta OS=Saccharomyces cerevisiae (strain ATCC 204508 / S288c) OX=559292 GN=APL6 PE=1 SV=2	P46682	APL6	92 kDa		unknown	726910	0	697690	0	316140	0	872090	18062000	2645100	0	2333300	0	820740	0	559530	0	1243300	0	0.86	0.94	1	0	1	0	1	0.77	1	0.14	1	0.11	1	0.17	1	0.96	1	0.17	1	1	5	0	2	0	5	1
UBX domain-containing protein 2 OS=Saccharomyces cerevisiae (strain ATCC 204508 / S288c) OX=559292 GN=UBX2 PE=1 SV=1	Q04228	UBX2	67 kDa		unknown	2771500	0	640370	0	2378900	0	6916300	0	8304200	-1	5834400	0	3580700	0	6897900	0	6691400	0	1	0	1	0	1	0	1	0	1	0	1	0	1	0	1	0	1	0	5	0	2	0	9	0	15	0
Glutamine--tRNA ligase OS=Saccharomyces cerevisiae (strain ATCC 204508 / S288c) OX=559292 GN=GLN4 PE=1 SV=2	P13188	GLN4	93 kDa		unknown	133040	0	431110	0	165590	0	407360	0	1815600	0	885610	0	945740	0	773990	0	349030	0	1	0.22	1	0	1	0	1	0.39	1	0	1	0	1	0	1	0	1	0	3	0	7	0	4	0	8	0
Signal peptidase complex catalytic subunit SEC11 OS=Saccharomyces cerevisiae (strain ATCC 204508 / S288c) OX=559292 GN=SEC11 PE=1 SV=2	P15367	SEC11	19 kDa		unknown	7878400	-1	11272000	-1	5856200	-1	6717500	0	15711000	-1	15340000	0	10958000	-1	20314000	0	17734000	0	1	0	1	0	1	0	1	0	1	0	1	0	1	0	1	0	1	0	11	0	11	0	7	0	10	0
Protein LTV1 OS=Saccharomyces cerevisiae (strain ATCC 204508 / S288c) OX=559292 GN=LTV1 PE=1 SV=2	P34078	LTV1	53 kDa		unknown	7253400	0	4480200	0	5975500	0	8635600	0	14391000	0	11217000	0	7624600	0	9774700	0	13821000	0	1	0	1	0	1	0	1	0	1	0	1	0	1	0	1	0.1	1	0	9	0	3	0	3	0	3	0
Protein TBF1 OS=Saccharomyces cerevisiae (strain ATCC 204508 / S288c) OX=559292 GN=TBF1 PE=1 SV=2	Q02457	TBF1	63 kDa		unknown	408810	0	2789200	0	2096100	-1	2293200	0	2838600	-1	6308200	0	2998900	0	6369400	0	3052300	0	0.96	0	1	0	1	0	1	0	1	0	1	0	1	0	1	0	1	0	3	0	10	0	5	0	5	0
DER1-like family member protein 1 OS=Saccharomyces cerevisiae (strain ATCC 204508 / S288c) OX=559292 GN=DFM1 PE=1 SV=1	Q12743	DFM1	38 kDa		unknown	9026000	0	12338000	0	16148000	0	16420000	0	22844000	0	21739000	0	9616900	0	6282700	0	10678000	0	1	0	1	0	1	0	1	0.22	1	0	1	0	1	0	1	0	1	0	10	0	10	0	10	0	9	0
Asparagine synthetase [glutamine-hydrolyzing] 1 OS=Saccharomyces cerevisiae (strain ATCC 204508 / S288c) OX=559292 GN=ASN1 PE=1 SV=2	P49089	ASN1	64 kDa	TRUE	unknown	2077900	0	1083100	0	2831400	0	4085100	0	5396200	0	3219300	0	3472300	0	6615200	0	5401000	0	0.99	0	1	0	1	0	1	0	1	0	1	0	1	0	1	0	1	0	8	0	3	0	8	0	8	0
NAD-dependent protein deacetylase HST2 OS=Saccharomyces cerevisiae (strain ATCC 204508 / S288c) OX=559292 GN=HST2 PE=1 SV=1	P53686	HST2	40 kDa		unknown	1416700	0	1486700	0	5315900	0	8496200	0	5670800	0	6514900	0	5807000	0	8987700	0	7357200	0	1	0.09	1	0	1	0.17	1	0.37	1	0.13	1	0	1	0.15	1	0.25	1	0.24	5	0	5	0	6	0	13	0
Actin-related protein 4 OS=Saccharomyces cerevisiae (strain ATCC 204508 / S288c) OX=559292 GN=ARP4 PE=1 SV=1	P80428	ARP4	55 kDa		unknown	2205500	0	1924500	0	1907000	-1	6383600	0	2242700	-1	4748200	0	1682400	0	4877400	0	2601900	0	1	0	1	0	1	0	1	0	1	0	1	0	1	0	1	0.08	1	0.13	10	0	7	0	7	0	17	0
Assembly chaperone of RPL4 OS=Saccharomyces cerevisiae (strain ATCC 204508 / S288c) OX=559292 GN=ACL4 PE=1 SV=1	Q03771	ACL4	43 kDa		unknown	2208800	0	5328400	0	5244400	0	6906800	0	3530900	0	2898000	0	8019600	0	13923000	0	9898900	0	1	0.11	1	0	1	0	1	0	1	0	1	0	1	0	1	0	1	0	5	0	8	0	7	0	10	0
Farnesyl pyrophosphate synthase OS=Saccharomyces cerevisiae (strain ATCC 204508 / S288c) OX=559292 GN=ERG20 PE=1 SV=2	P08524	ERG20	40 kDa		unknown	2319500	0	2928200	0	2403400	0	3855300	0	6627800	-1	2579000	0	5002700	0	2926100	0	6779700	0	1	0	1	0	1	0	1	0	1	0	1	0	1	0	1	0	1	0	10	0	11	0	9	0	7	0
Guanine nucleotide-binding protein alpha-1 subunit OS=Saccharomyces cerevisiae (strain ATCC 204508 / S288c) OX=559292 GN=GPA1 PE=1 SV=3	P08539	GPA1	54 kDa		unknown	705160	0	1385500	0	2402300	0	2133100	0	438130	0	3028500	0	946240	0	3666600	0	2037900	0	1	0	1	0.1	1	0	1	0	1	0	1	0	1	0	1	0	1	0.18	6	0	9	0	11	0	12	0
Ribonuclease P/MRP protein subunit RPP1 OS=Saccharomyces cerevisiae (strain ATCC 204508 / S288c) OX=559292 GN=RPP1 PE=1 SV=1	P38786	RPP1	32 kDa		unknown	3886000	0	4408100	-1	3782400	0	2840600	0	5124400	0	8153900	0	5095400	-1	5976300	0	5877500	0	1	0	1	0	1	0	1	0	1	0	1	0	1	0	1	0	1	0	10	0	10	0	9	0	7	0
Activator of stress genes 1 OS=Saccharomyces cerevisiae (strain ATCC 204508 / S288c) OX=559292 GN=ASG1 PE=1 SV=1	P40467	ASG1	109 kDa		unknown	290760	0	229610	0	1478500	0	1695700	0	995800	0	1308400	0	503590	0	3538600	0	595430	0	1	0.11	1	0.21	1	0.24	1	0.33	1	0	1	0	1	0	1	0	1	0	1	0	3	0	9	0	12	0
Sorting assembly machinery 37 kDa subunit OS=Saccharomyces cerevisiae (strain ATCC 204508 / S288c) OX=559292 GN=SAM37 PE=1 SV=1	P50110	SAM37	37 kDa		unknown	1636400	0	2280600	0	2701200	0	6293000	0	3303800	0	5596800	0	6599200	-1	5638800	0	4584000	0	1	0	1	0	1	0	1	0	1	0	1	0	1	0	1	0	1	0	8	0	8	0	6	0	13	0
Cluster of Phosphoglucomutase 1 OS=Saccharomyces cerevisiae (strain ATCC 204508 / S288c) OX=559292 GN=PGM1 PE=1 SV=1 (P33401)	P33401 [2]	PGM1	63 kDa	TRUE	unknown	0	0	337050	0	1876200	0	2722300	0	26571000	-1	21230000	0	1254600	0	0	0	2226000	0	0.96	0.08	1	0	1	0	1	0	1	0	1	0	1	0	1	0	1	0.79	2	0	4	0	8	0	10	0
CCA tRNA nucleotidyltransferase, mitochondrial OS=Saccharomyces cerevisiae (strain ATCC 204508 / S288c) OX=559292 GN=CCA1 PE=1 SV=1	P21269	CCA1	62 kDa		unknown	479220	0	685520	0	1212800	0	337730	0	1758400	0	3403700	0	1314500	0	4367400	0	4094900	0	1	0	1	0	1	0	1	0	1	0	1	0	1	0	1	0	1	0	9	0	8	0	8	0	3	0
Proteasome subunit beta type-3 OS=Saccharomyces cerevisiae (strain ATCC 204508 / S288c) OX=559292 GN=PUP3 PE=1 SV=1	P25451	PUP3	23 kDa		unknown	27986000	0	25163000	0	28926000	0	32358000	-1	21889000	0	36218000	0	33684000	0	11538000	0	42212000	0	1	0	1	0	1	0	1	0	1	0.1	1	0	1	0	0.97	0.06	1	0.09	13	0	11	0	11	0	9	0
Dolichyl-phosphate beta-glucosyltransferase OS=Saccharomyces cerevisiae (strain ATCC 204508 / S288c) OX=559292 GN=ALG5 PE=1 SV=1	P40350	ALG5	38 kDa		unknown	3877500	0	2220100	0	3719100	0	1901800	0	3851500	0	6403100	0	5896800	0	20238000	0	8037000	0	1	0.53	1	0	1	0	1	0	1	0	1	0	1	0.24	1	0.2	1	0	13	0	8	0	5	0	6	0
ATP-dependent DNA helicase MPH1 OS=Saccharomyces cerevisiae (strain ATCC 204508 / S288c) OX=559292 GN=MPH1 PE=1 SV=1	P40562	MPH1	114 kDa		unknown	360090	0	2282600	0	117450	0	164220	0	72147	0	487350	0	369100	0	615750	0	483990	0	1	0	1	0.09	1	0.87	1	0.05	1	0	1	0	1	0.1	1	0	1	0.12	6	0	9	0	5	0	5	0
Nucleoporin NUP116/NSP116 OS=Saccharomyces cerevisiae (strain ATCC 204508 / S288c) OX=559292 GN=NUP116 PE=1 SV=2	Q02630	NUP116	116 kDa		unknown	2952000	0	1182100	0	2005700	0	4680400	0	517060	0	1111600	0	3917100	0	2563300	0	1636100	0	1	0.26	1	0	1	0	1	0	1	0	1	0	1	0	1	0.13	1	0	9	0	7	0	7	0	16	0
Vacuolar transporter chaperone 3 OS=Saccharomyces cerevisiae (strain ATCC 204508 / S288c) OX=559292 GN=VTC3 PE=1 SV=1	Q02725	VTC3	97 kDa	TRUE	unknown	0	0	0	0	0	0	11649000	0	3214900	0	0	0	1423500	0	110190	0	205980	0	0.18	0.08	0	0.26	1	0	1	0	1	0.55	0	0	1	0	1	0	1	0	0	0	0	0	4	0	34	0
Isocitrate dehydrogenase [NADP], mitochondrial OS=Saccharomyces cerevisiae (strain ATCC 204508 / S288c) OX=559292 GN=IDP1 PE=1 SV=1	P21954	IDP1	48 kDa	TRUE	unknown	2087100	0	1454100	0	892820	0	1687700	0	2874500	0	3318700	0	1579300	0	1449200	0	1681800	0	1	0	1	0	1	0	1	0	1	0	1	0	1	0	1	0.08	1	0	7	0	7	0	7	0	6	0
Mitochondrial inner membrane i-AAA protease supercomplex subunit MGR1 OS=Saccharomyces cerevisiae (strain ATCC 204508 / S288c) OX=559292 GN=MGR1 PE=1 SV=1	P25573	MGR1	47 kDa		unknown	1843400	0	1565900	-1	1182800	0	2939000	0	2977200	0	2880700	0	2477500	0	6238100	0	2147100	0	1	0	1	0	1	0	1	0	1	0	1	0	1	0	1	0	1	0	8	0	6	0	5	0	9	0
Glycerol-3-phosphate O-acyltransferase 1 OS=Saccharomyces cerevisiae (strain ATCC 204508 / S288c) OX=559292 GN=SCT1 PE=1 SV=3	P32784	SCT1	86 kDa		unknown	1251800	0	1758800	0	1435900	0	2693600	0	1107000	0	3134000	0	1610400	0	3402100	21730000000	2528000	0	1	0	1	0.19	1	0.25	1	0.27	1	0	1	0	1	0	1	0.52	1	0.06	6	0	8	0	4	0	13	0
37S ribosomal protein S18, mitochondrial OS=Saccharomyces cerevisiae (strain ATCC 204508 / S288c) OX=559292 GN=MRPS18 PE=1 SV=2	P42847	MRPS18	25 kDa		unknown	2439600	0	2846400	0	5016900	0	7138600	-1	4319300	0	7003700	0	11035000	0	5909300	0	11579000	0	1	0	1	0	1	0	1	0	1	0	1	0	1	0	1	0	1	0	6	0	7	0	12	0	11	0
Mitochondrial import receptor subunit TOM22 OS=Saccharomyces cerevisiae (strain ATCC 204508 / S288c) OX=559292 GN=TOM22 PE=1 SV=3	P49334	TOM22	17 kDa		unknown	53921000	0	47135000	0	42878000	-1	179180000	-1	7050500	0	25401000	-1	47915000	0	50045000	0	30547000	-1	1	0	1	0.13	1	0	1	0	1	0	1	0	1	0	1	0	1	0	15	0	13	0	14	0	16	0
tRNA (guanine-N(7)-)-methyltransferase non-catalytic subunit TRM82 OS=Saccharomyces cerevisiae (strain ATCC 204508 / S288c) OX=559292 GN=TRM82 PE=1 SV=1	Q03774	TRM82	50 kDa		unknown	2551700	0	2077500	0	2328100	0	1800700	0	4393000	0	4920100	0	3656700	0	4691400	0	2555200	0	1	0.05	1	0	1	0	1	0	1	0	1	0	1	0	1	0	1	0.06	8	0	5	0	3	0	3	0
Ribosome biogenesis protein NOP53 OS=Saccharomyces cerevisiae (strain ATCC 204508 / S288c) OX=559292 GN=NOP53 PE=1 SV=1	Q12080	NOP53	53 kDa		unknown	5256800	0	7168300	0	226120	0	1895500	0	1133700	0	6388500	0	3357100	0	3144000	0	987100	0	1	0.05	1	0	0.97	0	1	0	1	0	1	0.24	1	0	1	0	1	0.16	18	0	14	0	2	0	6	0
rRNA-processing protein EFG1 OS=Saccharomyces cerevisiae (strain ATCC 204508 / S288c) OX=559292 GN=EFG1 PE=1 SV=2	Q3E705	EFG1	27 kDa		unknown	19659000	0	24672000	0	11213000	-1	17873000	0	18647000	0	29024000	0	20597000	0	21158000	0	23352000	0	1	0	1	0.09	1	0	1	0	1	0	1	0	1	0	1	0	1	0	12	0	11	0	7	0	10	0
Family of serine hydrolases 3 OS=Saccharomyces cerevisiae (strain ATCC 204508 / S288c) OX=559292 GN=FSH3 PE=2 SV=1	Q99369	FSH3	30 kDa		unknown	3785300	-1	2866600	0	5664900	-1	7166900	-1	6076300	0	5804100	0	7788200	0	18681000	-1	12521000	0	1	0	1	0	1	0	1	0	1	0	1	0	1	0	1	0	1	0	11	0	7	0	7	0	10	0
Delta(7)-sterol 5(6)-desaturase OS=Saccharomyces cerevisiae (strain ATCC 204508 / S288c) OX=559292 GN=ERG3 PE=1 SV=1	P32353	ERG3	43 kDa		unknown	23274000	-1	25386000	0	26030000	0	31174000	0	7570800	-1	12714000	-1	13059000	-1	8636300	-1	9737000	0	1	0	1	0	1	0	1	0	1	0	1	0	1	0	1	0	1	0	12	0	12	0	11	0	7	0
54S ribosomal protein L41, mitochondrial OS=Saccharomyces cerevisiae (strain ATCC 204508 / S288c) OX=559292 GN=MRP20 PE=1 SV=1	P32387	MRP20	31 kDa		unknown	3761900	0	5243300	0	3632300	0	7124900	0	16753000	0	8218800	0	9504400	0	8271200	0	9927500	0	1	0	1	0.05	1	0	1	0	1	0	1	0	1	0	1	0	1	0	11	0	12	0	7	0	14	0
Target of rapamycin complex subunit LST8 OS=Saccharomyces cerevisiae (strain ATCC 204508 / S288c) OX=559292 GN=LST8 PE=1 SV=1	P41318	LST8	34 kDa		unknown	2100400	0	2648700	0	4212800	-1	7613300	0	13531000	0	9169400	0	4517800	0	3441100	0	13189000	0	1	0	1	0	1	0	1	0	1	0	1	0	1	0	1	0	1	0	7	0	6	0	4	0	12	0
Conserved oligomeric Golgi complex subunit 8 OS=Saccharomyces cerevisiae (strain ATCC 204508 / S288c) OX=559292 GN=COG8 PE=1 SV=1	Q04632	COG8	70 kDa		unknown	788570	0	1132500	0	948900	0	1623600	0	1536100	0	1695000	0	1481000	-1	2324600	0	957120	0	1	0	1	0	1	0	1	0	1	0	1	0	1	0	1	0	1	0	7	0	9	0	8	0	11	0
Lysophospholipase NTE1 OS=Saccharomyces cerevisiae (strain ATCC 204508 / S288c) OX=559292 GN=NTE1 PE=1 SV=1	Q04958	NTE1	187 kDa		unknown	256300	0	287290	0	713360	0	1378900	0	192550	0	992540	0	315510	0	858500	0	1449900	0	1	0	0.96	0	1	0	1	0	1	0	1	0	1	0	1	0	1	0	6	0	2	0	8	0	11	0
Mevalonate kinase OS=Saccharomyces cerevisiae (strain ATCC 204508 / S288c) OX=559292 GN=ERG12 PE=1 SV=1	P07277	ERG12	48 kDa		unknown	488210	-1	703330	0	581690	0	1442100	-1	6000800	-1	11372000	0	1863800	0	1423600	0	2306500	0	0.96	0	1	0	0.96	0	1	0	1	0	1	0	1	0	1	0	1	0	3	0	4	0	2	0	8	0
Homoserine dehydrogenase OS=Saccharomyces cerevisiae (strain ATCC 204508 / S288c) OX=559292 GN=HOM6 PE=1 SV=1	P31116	HOM6	39 kDa		unknown	2783800	0	3289400	0	4073500	0	6180400	0	2682600	0	3602900	0	5389200	0	2722800	0	3754300	0	1	0	1	0	1	0.1	1	0	1	0	1	0	1	0	1	0	1	0	10	0	7	0	10	0	10	0
Exocyst complex component SEC8 OS=Saccharomyces cerevisiae (strain ATCC 204508 / S288c) OX=559292 GN=SEC8 PE=1 SV=1	P32855	SEC8	122 kDa		unknown	189420	0	243860	0	601870	0	349800	0	1659000	0	1726300	0	862220	0	506220	0	698910	0	1	0	1	0	1	0.41	1	0	1	0	1	0	1	0.2	1	0	1	0.49	4	0	4	0	6	0	5	0
Cluster of Inosine-5'-monophosphate dehydrogenase 3 OS=Saccharomyces cerevisiae (strain ATCC 204508 / S288c) OX=559292 GN=IMD3 PE=1 SV=1 (P50095)	P50095 [4]	IMD3	57 kDa	TRUE	unknown	1793900	0	1229800	0	0	0	0	0	1595600	0	1964500	0	2757400	0	5233900	0	1473400	0	1	0.45	1	0	1	0.05	1	0	1	0	1	0	1	0.07	1	0	1	0.14	6	0	8	0	5	0	7	0
General negative regulator of transcription subunit 2 OS=Saccharomyces cerevisiae (strain ATCC 204508 / S288c) OX=559292 GN=CDC36 PE=1 SV=1	P06100	CDC36	22 kDa		unknown	15941000	0	6647800	-1	10942000	-1	17991000	-1	11412000	0	16239000	-1	18705000	-1	12400000	-1	17726000	-1	1	0	1	0	1	0	1	0	1	0	1	0	1	0	1	0	1	0	13	0	10	0	10	0	11	0
Endosomal protein P24B OS=Saccharomyces cerevisiae (strain ATCC 204508 / S288c) OX=559292 GN=EMP24 PE=1 SV=1	P32803	EMP24	23 kDa		unknown	7390900	-1	5000300	0	1745900	-1	38767000	-1	8942200	0	6305100	0	16783000	0	12535000	0	13808000	0	1	0	1	0	0.96	0	1	0	1	0	1	0	1	0	1	0	1	0	6	0	7	0	2	0	16	0
Mitochondrial import inner membrane translocase subunit TIM23 OS=Saccharomyces cerevisiae (strain ATCC 204508 / S288c) OX=559292 GN=TIM23 PE=1 SV=1	P32897	TIM23	23 kDa		unknown	17692000	0	15201000	0	8247300	0	37949000	0	844470	0	3946000	0	21682000	0	28573000	0	22561000	0	1	0	1	0	1	0	1	0.11	1	0	1	0	1	0	1	0	1	0	7	0	5	0	4	0	14	0
General negative regulator of transcription subunit 4 OS=Saccharomyces cerevisiae (strain ATCC 204508 / S288c) OX=559292 GN=MOT2 PE=1 SV=1	P34909	MOT2	65 kDa		unknown	3713100	0	5624100	0	3596100	0	3573900	0	1437300	0	4967000	0	5073500	0	2847400	0	5426400	0	1	0	1	0.08	1	0	1	0	1	0	1	0	1	0	1	0	1	0	15	0	12	0	10	0	8	0
Proteasome subunit alpha type-4 OS=Saccharomyces cerevisiae (strain ATCC 204508 / S288c) OX=559292 GN=PRE6 PE=1 SV=1	P40303	PRE6	28 kDa		unknown	15895000	0	11862000	0	5564100	0	10341000	0	24188000	0	16208000	-1	21322000	8368200	6579400	0	6102500	-1	1	0	1	0	1	0.13	1	0	1	0	1	0	1	0.95	0.97	0	1	0	16	0	11	0	5	0	7	0
AP-3 complex subunit sigma OS=Saccharomyces cerevisiae (strain ATCC 204508 / S288c) OX=559292 GN=APS3 PE=1 SV=1	P47064	APS3	22 kDa		unknown	16360000	0	20439000	0	26507000	-1	30775000	0	21057000	-1	44744000	0	26579000	-1	62648000	-1	43487000	0	1	0	1	0	1	0	1	0	1	0	1	0	1	0	1	0	1	0	10	0	11	0	8	0	9	0
Respiratory supercomplex factor 2, mitochondrial OS=Saccharomyces cerevisiae (strain ATCC 204508 / S288c) OX=559292 GN=RCF2 PE=1 SV=1	P53721	RCF2	25 kDa		unknown	19157000	0	23605000	0	24479000	0	22524000	0	33642000	0	29520000	9612100	22755000	6694600	49948000	9880000	29867000	0	1	0	1	0	1	0	1	0	1	0	1	0.95	1	0.52	1	0.76	1	0	6	0	7	0	10	0	6	0
Histone H2A.Z OS=Saccharomyces cerevisiae (strain ATCC 204508 / S288c) OX=559292 GN=HTZ1 PE=1 SV=3	Q12692	HTZ1	14 kDa	TRUE	unknown	87981000	18508000000	165580000	0	115090000	1102600000	228810000	0	14908000	186990000	18815000	12886000	120410000	78796000	72824000	213520000	11422000	164050000	1	0.99	1	0	1	0.97	1	0.14	0.31	0.93	0.96	0.9	1	0.96	1	0.97	1	0.99	8	6	7	0	7	3	10	0
Casein kinase II subunit alpha OS=Saccharomyces cerevisiae (strain ATCC 204508 / S288c) OX=559292 GN=CKA1 PE=1 SV=1	P15790	CKA1	45 kDa		unknown	1235000	0	364450	0	0	-1	300150	0	3693500	-1	4202800	0	1013600	0	3468600	-1	1924400	0	1	0.92	1	0.11	0.94	0	1	0.1	1	0	1	0	1	0	1	0	1	0	5	1	5	0	1	0	2	0
FK506-binding protein 1 OS=Saccharomyces cerevisiae (strain ATCC 204508 / S288c) OX=559292 GN=FPR1 PE=1 SV=2	P20081	FPR1	12 kDa		unknown	21363000	0	26707000	-1	24990000	0	23262000	0	20831000	-1	19469000	0	10383000	0	10809000	-1	18193000	0	1	0	1	0	1	0	1	0	1	0	1	0	1	0	1	0	1	0	9	0	11	0	11	0	10	0
Elongation of fatty acids protein 2 OS=Saccharomyces cerevisiae (strain ATCC 204508 / S288c) OX=559292 GN=ELO2 PE=1 SV=1	P25358	ELO2	40 kDa		unknown	54049000	-1	57641000	0	42295000	28951000	60485000	0	54456000	198870000	47712000	40250000	58398000	90853000	70205000	127980000	60498000	39130000	1	0	1	0	1	0.6	1	0	1	0.95	1	0.96	1	0.95	1	0.97	1	0.98	10	0	9	0	9	2	9	0
Carboxypeptidase S OS=Saccharomyces cerevisiae (strain ATCC 204508 / S288c) OX=559292 GN=CPS1 PE=1 SV=2	P27614	CPS1	65 kDa		unknown	2382100	0	5811900	0	483740	0	3610200	-1	5361400	0	722330	0	1413000	-1	2381400	0	1677100	0	1	0.07	1	0	0.96	0	1	0	1	0	1	0	1	0	1	0	1	0	13	0	12	0	2	0	8	0
Actin-related protein 3 OS=Saccharomyces cerevisiae (strain ATCC 204508 / S288c) OX=559292 GN=ARP3 PE=1 SV=1	P47117	ARP3	50 kDa		unknown	0	0	309830	0	333690	0	719720	0	12011000	0	9676400	0	1198100	-1	2788400	-1	5518000	0	0	0	0.96	0	0.96	0	1	0	1	0	1	0	1	0	1	0	1	0	0	0	2	0	3	0	3	0
Asparagine synthetase [glutamine-hydrolyzing] 2 OS=Saccharomyces cerevisiae (strain ATCC 204508 / S288c) OX=559292 GN=ASN2 PE=1 SV=2	P49090	ASN2	65 kDa	TRUE	unknown	1936800	-1	586190	-1	2607900	0	5277500	0	4682800	-1	3238900	0	3199300	-1	5526200	0	5767500	0	1	0	1	0	1	0	1	0	1	0	1	0	1	0	1	0	1	0	9	0	3	0	5	0	8	0
Seventh homolog of septin 1 OS=Saccharomyces cerevisiae (strain ATCC 204508 / S288c) OX=559292 GN=SHS1 PE=1 SV=1	Q07657	SHS1	63 kDa		unknown	1133500	0	2816600	0	1144000	0	2398700	0	1660100	0	1746000	0	2046000	0	1896600	0	2529500	0	1	0	1	0	1	0	1	0	1	0	1	0	1	0	0.97	0	1	0	8	0	10	0	7	0	13	0
Aminopeptidase 2, mitochondrial OS=Saccharomyces cerevisiae (strain ATCC 204508 / S288c) OX=559292 GN=APE2 PE=1 SV=4	P32454	APE2	108 kDa	TRUE	unknown	278470	0	763800	0	675260	0	570030	0	2293300	7947200	1938800	0	743610	0	214000	0	786170	0	0.75	0	1	0	1	0	1	0	1	0.59	1	0	1	0	1	0.06	1	0.41	1	0	5	0	7	0	7	0
GPI ethanolamine phosphate transferase 1 OS=Saccharomyces cerevisiae (strain ATCC 204508 / S288c) OX=559292 GN=MCD4 PE=1 SV=1	P36051	MCD4	106 kDa		unknown	885780	0	1764400	0	2363300	-1	1790100	0	3521300	0	4019300	0	2219900	0	4171700	0	2365000	0	1	0	1	0	1	0	1	0	1	0	1	0	1	0	1	0	1	0	8	0	9	0	7	0	6	0
Protein arginine N-methyltransferase 1 OS=Saccharomyces cerevisiae (strain ATCC 204508 / S288c) OX=559292 GN=HMT1 PE=1 SV=1	P38074	HMT1	40 kDa		unknown	10304000	0	9483000	0	14507000	0	796640	0	8446400	0	4962500	0	4860000	0	7511400	0	2412600	0	1	0.24	1	0	1	0	0.97	0.09	1	0	1	0	1	0	1	0	1	0	19	0	13	0	6	0	1	0
Uncharacterized protein YHR127W OS=Saccharomyces cerevisiae (strain ATCC 204508 / S288c) OX=559292 GN=YHR127W PE=1 SV=1	P38833	YHR127W	27 kDa		unknown	7497000	0	7445100	0	2559800	0	3741500	0	2691300	0	2520300	0	4090600	0	2449600	0	2093500	0	1	0	1	0.08	1	0	1	0	1	0	1	0	1	0	1	0	1	0	13	0	16	0	8	0	10	0
Myosin light chain 1 OS=Saccharomyces cerevisiae (strain ATCC 204508 / S288c) OX=559292 GN=MLC1 PE=1 SV=1	P53141	MLC1	16 kDa		unknown	4484800	0	4319600	0	9206000	0	20483000	0	156670	0	2033000	0	6519100	0	12276000	0	4407500	0	1	0	1	0	1	0	1	0	0.95	0	1	0	1	0	1	0	1	0	7	0	6	0	13	0	14	0
Exosome complex exonuclease RRP6 OS=Saccharomyces cerevisiae (strain ATCC 204508 / S288c) OX=559292 GN=RRP6 PE=1 SV=1	Q12149	RRP6	84 kDa		unknown	878530	0	923480	0	955680	0	319010	0	383700	0	2056800	0	2727800	0	1498100	0	945020	0	1	0	1	0	1	0	1	0.1	1	0	1	0	1	0	1	0	1	0	9	0	9	0	8	0	6	0
rRNA-processing protein UTP23 OS=Saccharomyces cerevisiae (strain ATCC 204508 / S288c) OX=559292 GN=UTP23 PE=1 SV=1	Q12339	UTP23	29 kDa		unknown	8386400	0	8646400	0	3878000	0	4216000	0	10506000	0	9730100	0	9807900	0	6608500	0	8647100	-1	1	0	1	0	1	0	1	0	1	0	1	0	1	0	1	0	1	0	9	0	12	0	6	0	5	0
Ribonucleoside-diphosphate reductase small chain 1 OS=Saccharomyces cerevisiae (strain ATCC 204508 / S288c) OX=559292 GN=RNR2 PE=1 SV=2	P09938	RNR2	46 kDa		unknown	711220	0	1047300	0	465230	0	1541100	0	5715600	-1	3393900	0	3009000	0	6996100	0	2234300	0	1	0	1	0	1	0	1	0	1	0	1	0	1	0	1	0	1	0	5	0	9	0	3	0	5	0
Threonine synthase OS=Saccharomyces cerevisiae (strain ATCC 204508 / S288c) OX=559292 GN=THR4 PE=1 SV=1	P16120	THR4	57 kDa		unknown	544560	0	986880	0	1473100	0	1004000	0	3198100	0	1517400	0	1337000	0	3108500	-1	2079900	0	1	0	1	0	1	0	1	0	1	0	1	0	1	0	1	0	1	0	5	0	8	0	8	0	9	0
ER membrane protein complex subunit 1 OS=Saccharomyces cerevisiae (strain ATCC 204508 / S288c) OX=559292 GN=EMC1 PE=1 SV=1	P25574	EMC1	87 kDa		unknown	270470	94857000	558010	-1	476870	0	18360000	166790000	0	87643000	597750	148820000	945890	4534400	2370000	20810000	879450	52340000	0.96	0.79	1	0	1	0	1	0.58	0.3	0.71	1	0.54	1	0.35	1	0.6	1	0.72	3	1	4	0	4	0	26	2
Phospholipid-transporting ATPase DNF1 OS=Saccharomyces cerevisiae (strain ATCC 204508 / S288c) OX=559292 GN=DNF1 PE=1 SV=2	P32660	DNF1	178 kDa	TRUE	unknown	464840	0	876170	0	48732	0	1869300	0	818100	0	720490	0	300900	0	1529100	0	370690	0	1	0	1	0	0.96	0	1	0	1	0	1	0	1	0	1	0	1	0	6	0	15	0	1	0	14	0
Cytochrome c oxidase subunit 13, mitochondrial OS=Saccharomyces cerevisiae (strain ATCC 204508 / S288c) OX=559292 GN=COX13 PE=1 SV=1	P32799	COX13	15 kDa		unknown	9089600	-1	11502000	-1	28535000	-1	107690000	0	21904000	0	24438000	0	8244000	0	5963100	0	13338000	0	1	0	1	0	1	0	1	0	1	0	1	0	1	0	1	0	1	0	10	0	9	0	5	0	16	0
Protein BOB1 OS=Saccharomyces cerevisiae (strain ATCC 204508 / S288c) OX=559292 GN=BOI1 PE=1 SV=1	P38041	BOI1	109 kDa	TRUE	unknown	417190	0	66520	0	282270	0	361570	0	111790	0	949290	0	606260	0	289750	0	372230	0	1	0.08	0.95	0	1	0	1	0.1	1	0	1	0	1	0.2	1	0	1	0	8	0	3	0	6	0	10	0
Eisosome protein 1 OS=Saccharomyces cerevisiae (strain ATCC 204508 / S288c) OX=559292 GN=EIS1 PE=1 SV=1	Q05050	EIS1	93 kDa		unknown	2034700	0	1843000	0	331720	0	1130500	0	1889600	0	1278900	0	2096400	0	333540	0	317530	0	1	0	1	0	1	0	1	0.18	1	0	1	0	1	0	1	0	1	0	13	0	9	0	4	0	8	0
Cytochrome b-c1 complex subunit 7, mitochondrial OS=Saccharomyces cerevisiae (strain ATCC 204508 / S288c) OX=559292 GN=QCR7 PE=1 SV=2	P00128	QCR7	15 kDa		unknown	8524200	-1	3976400	-1	24869000	-1	290360000	0	0	-1	865250	0	9379400	-1	114600	0	7811600	-1	1	0	1	0	1	0	1	0	0.95	0	1	0	1	0	1	0	1	0	9	0	8	0	15	0	29	0
Histidine biosynthesis trifunctional protein OS=Saccharomyces cerevisiae (strain ATCC 204508 / S288c) OX=559292 GN=HIS4 PE=1 SV=3	P00815	HIS4	88 kDa		unknown	356420	0	497850	55097000	1673600	0	1428000	0	3933500	0	3352900	0	173110	0	1968400	0	480590	0	0.96	0	1	0.92	1	0	1	0	1	0	1	0	1	0	1	0	1	0	3	0	5	1	9	0	9	0
Orotidine 5'-phosphate decarboxylase OS=Saccharomyces cerevisiae (strain ATCC 204508 / S288c) OX=559292 GN=URA3 PE=1 SV=2	P03962	URA3	29 kDa		unknown	844720	0	877930	0	434200	0	850610	0	1468800	0	17674000	0	695240	0	25561000	0	20596000	0	1	0	1	0	0.96	0.18	1	0.14	1	0	1	0	1	0	1	0	1	0.11	4	0	3	0	2	0	3	0
Transcription elongation factor S-II OS=Saccharomyces cerevisiae (strain ATCC 204508 / S288c) OX=559292 GN=DST1 PE=1 SV=4	P07273	DST1	35 kDa		unknown	5890700	0	4427300	-1	10297000	0	2242800	0	3951200	-1	9398800	0	7691200	0	6000000	0	6471000	0	1	0.25	1	0	1	0	1	0	1	0	1	0	1	0	0.99	0	1	0	10	0	6	0	14	0	3	0
DNA-directed RNA polymerases I, II, and III subunit RPABC3 OS=Saccharomyces cerevisiae (strain ATCC 204508 / S288c) OX=559292 GN=RPB8 PE=1 SV=1	P20436	RPB8	17 kDa		unknown	6226300	0	6692300	-1	11544000	0	3236400	-1	19306000	0	19924000	0	12235000	-1	21834000	-1	13664000	0	1	0	1	0	1	0	0.97	0	1	0	1	0	1	0	1	0	1	0	11	0	9	0	11	0	4	0
Signal recognition particle subunit SRP21 OS=Saccharomyces cerevisiae (strain ATCC 204508 / S288c) OX=559292 GN=SRP21 PE=1 SV=3	P32342	SRP21	18 kDa		unknown	11279000	0	33543000	0	58726000	0	45238000	0	53581000	0	30894000	0	50301000	0	22320000	0	34692000	0	1	0.06	1	0.18	1	0.17	1	0	1	0	1	0	1	0	1	0	1	0	12	0	8	0	11	0	8	0
Serine/threonine-protein kinase TOR1 OS=Saccharomyces cerevisiae (strain ATCC 204508 / S288c) OX=559292 GN=TOR1 PE=1 SV=3	P35169	TOR1	281 kDa	TRUE	unknown	44347	0	31762	0	51523	416100	131620	0	195340	0	349200	0	72714	0	0	0	155570	0	1	0.3	0.88	0.45	1	0.57	1	0	1	0	1	0.05	1	0.2	1	0.27	1	0	6	0	2	0	2	1	8	0
Phosphoribosylformylglycinamidine synthase OS=Saccharomyces cerevisiae (strain ATCC 204508 / S288c) OX=559292 GN=ADE6 PE=1 SV=2	P38972	ADE6	149 kDa		unknown	293100	0	324900	0	561590	0	499760	0	305940	0	602470	0	290100	0	1145500	0	653440	0	1	0	1	0	1	0	1	0	1	0	1	0	1	0	1	0	1	0	7	0	5	0	8	0	5	0
Dolichyl-phosphate-mannose--protein mannosyltransferase 3 OS=Saccharomyces cerevisiae (strain ATCC 204508 / S288c) OX=559292 GN=PMT3 PE=1 SV=2	P47190	PMT3	86 kDa	TRUE	unknown	0	0	3442100	0	4435900	0	2529600	0	7482300	0	5597300	0	5574000	0	9350400	0	4193200	0	0	0.09	0.81	0	1	0	0.99	0	1	0	1	0	1	0	1	0	0.99	0	0	0	6	0	8	0	8	0
Ergosterol biosynthetic protein 28 OS=Saccharomyces cerevisiae (strain ATCC 204508 / S288c) OX=559292 GN=ERG28 PE=1 SV=1	P40030	ERG28	17 kDa		unknown	50893000	0	48227000	0	51825000	0	53483000	0	47915000	0	66992000	0	48911000	8046200	125820000	0	68971000	0	0.96	0	0.96	0	0.96	0	1	0	1	0.42	1	0	1	1	1	0	1	0.12	11	0	9	0	10	0	9	0
N-terminal acetyltransferase A complex catalytic subunit ARD1 OS=Saccharomyces cerevisiae (strain ATCC 204508 / S288c) OX=559292 GN=ARD1 PE=1 SV=2	P07347	ARD1	28 kDa		unknown	5685900	-1	6755100	0	9977500	0	3895900	0	11345000	0	18388000	0	18667000	0	10087000	0	10703000	-1	1	0	1	0	1	0	1	0	1	0	1	0	1	0	1	0	1	0	8	0	7	0	10	0	5	0
ATP-dependent RNA helicase DRS1 OS=Saccharomyces cerevisiae (strain ATCC 204508 / S288c) OX=559292 GN=DRS1 PE=1 SV=2	P32892	DRS1	85 kDa	TRUE	unknown	941300	0	144290	0	1460500	0	1978700	0	0	0	0	0	108830	0	3283600	0	2509500	0	1	0.06	1	0	1	0	1	0	0.95	0	1	0	1	0	1	0	1	0	9	0	6	0	14	0	14	0
Tricarboxylate transport protein OS=Saccharomyces cerevisiae (strain ATCC 204508 / S288c) OX=559292 GN=CTP1 PE=2 SV=3	P38152	CTP1	32 kDa		unknown	3860900	0	4865700	0	11187000	0	6034200	0	7966300	0	4627400	0	5169000	0	10194000	0	6501400	0	1	0	1	0	1	0	1	0	1	0	1	0	1	0	1	0	1	0	8	0	9	0	14	0	7	0
Probable S-adenosylmethionine-dependent methyltransferase CRG1 OS=Saccharomyces cerevisiae (strain ATCC 204508 / S288c) OX=559292 GN=CRG1 PE=1 SV=1	P38892	CRG1	34 kDa		unknown	0	0	0	0	3791000	0	7019500	0	10628000	-1	6759900	0	2387900	0	8560500	0	4340500	-1	0	0	0.07	0	1	0	1	0	1	0	1	0.09	1	0.16	1	0	1	0	0	0	0	0	10	0	11	0
Mitochondrial acidic protein MAM33 OS=Saccharomyces cerevisiae (strain ATCC 204508 / S288c) OX=559292 GN=MAM33 PE=1 SV=1	P40513	MAM33	30 kDa		unknown	2217600	0	2685800	0	7631800	0	13530000	-1	12605000	0	11806000	0	9707500	0	7948600	0	10119000	-1	1	0	1	0	1	0	1	0	1	0	1	0	1	0	1	0	1	0	4	0	8	0	8	0	10	0
Probable vacuolar amino acid transporter YPQ1 OS=Saccharomyces cerevisiae (strain ATCC 204508 / S288c) OX=559292 GN=YPQ1 PE=1 SV=1	Q12010	YPQ1	35 kDa		unknown	17452000	-1	25906000	-1	28925000	-1	31544000	-1	14888000	-1	17144000	-1	11049000	-1	10815000	-1	52744000	0	1	0	1	0	1	0	1	0	1	0	0.97	0	1	0	0.97	0	1	0.06	14	0	15	0	12	0	11	0
Cluster of Y' element ATP-dependent helicase YJL225C OS=Saccharomyces cerevisiae (strain ATCC 204508 / S288c) OX=559292 GN=YJL225C PE=2 SV=2 (P40889)	P40889 [14]	YJL225C	198 kDa	TRUE	unknown	0	0	0	0	0	0	0	0	0	0	197920	0	0	0	766010	0	830930	0	0.05	0.44	0	0	0.89	0.39	1	0.33	1	0.21	1	0.08	1	0.21	1	0	1	0.06	0	0	0	0	1	0	10	0
GPI transamidase component GAA1 OS=Saccharomyces cerevisiae (strain ATCC 204508 / S288c) OX=559292 GN=GAA1 PE=1 SV=1	P39012	GAA1	69 kDa		unknown	1173800	0	2099500	0	2176300	-1	4554000	-1	3522900	-1	5743400	-1	3124700	0	9486300	-1	3361800	0	1	0	1	0	1	0	1	0	1	0	1	0	1	0	1	0	1	0	6	0	9	0	7	0	8	0
Coatomer subunit delta OS=Saccharomyces cerevisiae (strain ATCC 204508 / S288c) OX=559292 GN=RET2 PE=1 SV=3	P43621	RET2	61 kDa		unknown	1886400	0	2581100	0	6282400	-1	2147200	0	11545000	0	5434700	3231300	2358700	2148400	1478200	-1	3836100	0	1	0	1	0	1	0	0.97	0	1	0.73	1	0.32	1	0.83	1	0	1	0	4	0	7	0	10	0	5	0
Ribosome biogenesis protein 15 OS=Saccharomyces cerevisiae (strain ATCC 204508 / S288c) OX=559292 GN=NOP15 PE=1 SV=1	P53927	NOP15	25 kDa		unknown	47102000	0	55349000	0	37540000	0	24724000	0	67935000	0	47047000	0	29131000	4434600	59060000	0	42890000	0	1	0	1	0	1	0	1	0	1	0	1	0	1	0.93	1	0	1	0.09	11	0	9	0	10	0	6	0
Cluster of GTP-binding protein YPT31/YPT8 OS=Saccharomyces cerevisiae (strain ATCC 204508 / S288c) OX=559292 GN=YPT31 PE=1 SV=3 (P38555)	P38555 [2]	YPT31	24 kDa	TRUE	unknown	879400	0	0	0	5423400	-1	6540500	-1	1146800	-1	6317100	-1	4270700	0	12742000	0	4337000	0	1	0	1	0	1	0	1	0	1	0	1	0	1	0	1	0	1	0	8	0	3	0	13	0	10	0
tRNA dimethylallyltransferase OS=Saccharomyces cerevisiae (strain ATCC 204508 / S288c) OX=559292 GN=MOD5 PE=1 SV=2	P07884	MOD5	50 kDa		unknown	123780	0	533240	0	1171000	0	1836300	0	1785800	0	2358000	0	1003200	0	6006300	0	1187100	0	1	0	1	0.13	1	0	1	0	1	0.24	1	0	1	0	1	0	1	0	2	0	3	0	5	0	6	0
Glutamate 5-kinase OS=Saccharomyces cerevisiae (strain ATCC 204508 / S288c) OX=559292 GN=PRO1 PE=1 SV=2	P32264	PRO1	47 kDa		unknown	1060100	0	3799400	0	1952000	0	3713600	0	4823200	-1	4749500	0	3909000	0	4257800	0	4556300	0	1	0	1	0	1	0	1	0.09	1	0	1	0	1	0	1	0	1	0	6	0	7	0	5	0	10	0
Glutathione-specific gamma-glutamylcyclotransferase OS=Saccharomyces cerevisiae (strain ATCC 204508 / S288c) OX=559292 GN=GCG1 PE=1 SV=1	P32656	GCG1	26 kDa		unknown	5840000	0	7039000	0	12067000	0	15683000	0	13434000	-1	16632000	0	7968900	-1	25077000	-1	15963000	-1	1	0	1	0	1	0	1	0	1	0	1	0	1	0	1	0	1	0	5	0	7	0	8	0	10	0
Cytochrome c oxidase subunit 4, mitochondrial OS=Saccharomyces cerevisiae (strain ATCC 204508 / S288c) OX=559292 GN=COX4 PE=1 SV=1	P04037	COX4	17 kDa		unknown	4310500	-1	9661700	-1	19528000	0	183800000	0	18806000	-1	14902000	-1	5645900	0	20141000	-1	4746300	0	1	0	1	0	1	0	1	0	1	0	1	0	1	0	1	0	1	0	8	0	8	0	9	0	24	0
Phenylalanine--tRNA ligase beta subunit OS=Saccharomyces cerevisiae (strain ATCC 204508 / S288c) OX=559292 GN=FRS1 PE=1 SV=3	P15624	FRS1	67 kDa		unknown	1162500	0	824180	0	855970	0	716720	0	2375000	0	1703400	0	1630400	0	627840	0	1342600	0	1	0	1	0	1	0	1	0	1	0	1	0	1	0	1	0	1	0	10	0	6	0	7	0	4	0
54S ribosomal protein L6, mitochondrial OS=Saccharomyces cerevisiae (strain ATCC 204508 / S288c) OX=559292 GN=MRPL6 PE=1 SV=2	P32904	MRPL6	24 kDa		unknown	5597100	0	4506700	-1	8950100	-1	6122600	0	9185000	0	6446000	-1	9247200	0	5156100	0	5540700	0	1	0	1	0	1	0	1	0	1	0	1	0	1	0	1	0	1	0	6	0	7	0	11	0	7	0
Protein phosphatase 2C homolog 3 OS=Saccharomyces cerevisiae (strain ATCC 204508 / S288c) OX=559292 GN=PTC3 PE=1 SV=4	P34221	PTC3	51 kDa	TRUE	unknown	1290600	-1	5543200	0	5213700	0	8295200	0	10334000	0	7593600	0	6751800	0	8209600	-1	6304400	0	1	0	1	0	1	0	1	0	1	0	1	0	1	0	1	0	1	0.36	5	0	7	0	5	0	6	0
54S ribosomal protein L11, mitochondrial OS=Saccharomyces cerevisiae (strain ATCC 204508 / S288c) OX=559292 GN=MRPL11 PE=1 SV=2	P36521	MRPL11	29 kDa		unknown	5537300	0	4917300	0	6548200	0	7938700	0	4738000	193050000	1851100	949860000	3933900	88008000	3036000	236190000	3523600	1038300000	1	0.18	1	0	1	0.47	1	0	1	0.98	1	0.97	1	0.94	1	0.97	1	0.98	10	0	8	0	9	1	10	0
OTU domain-containing protein 2 OS=Saccharomyces cerevisiae (strain ATCC 204508 / S288c) OX=559292 GN=OTU2 PE=1 SV=1	P38747	OTU2	36 kDa		unknown	4265300	0	21249000	0	56920000	0	4587400	0	8090100	-1	7489100	0	9971200	5200700	10031000	0	6074800	0	1	0.1	1	0	1	0.12	1	0.06	1	0	1	0	1	0.95	1	0	1	0.37	8	0	9	0	7	0	6	0
Ribosomal lysine N-methyltransferase 2 OS=Saccharomyces cerevisiae (strain ATCC 204508 / S288c) OX=559292 GN=RKM2 PE=1 SV=1	Q03942	RKM2	56 kDa		unknown	0	0	257550	0	690550	0	1250100	0	1550900	0	2501600	0	820280	0	5105700	0	3471300	0	0.96	0	1	0	1	0	1	0	1	0	1	0	1	0.19	1	0	1	0	2	0	3	0	7	0	7	0
MIP18 family protein YHR122W OS=Saccharomyces cerevisiae (strain ATCC 204508 / S288c) OX=559292 GN=YHR122W PE=1 SV=1	P38829	YHR122W	26 kDa		unknown	6206800	0	8320500	-1	13458000	0	17800000	-1	12071000	-1	14171000	0	14710000	-1	32006000	-1	14523000	-1	1	0	1	0	1	0	1	0	1	0	1	0	1	0	1	0	1	0	6	0	7	0	9	0	9	0
SWI5-dependent HO expression protein 4 OS=Saccharomyces cerevisiae (strain ATCC 204508 / S288c) OX=559292 GN=SHE4 PE=1 SV=2	P51534	SHE4	90 kDa		unknown	192090	0	68155	0	360610	0	1461500	0	618990	0	1178200	0	768660	0	368130	0	834520	0	1	0	1	0	1	0	1	0	1	0	1	0	1	0	1	0	1	0	2	0	5	0	5	0	12	0
Dynamin-related protein DNM1 OS=Saccharomyces cerevisiae (strain ATCC 204508 / S288c) OX=559292 GN=DNM1 PE=1 SV=1	P54861	DNM1	85 kDa	TRUE	unknown	89370	0	0	0	185600	0	406380	0	2041800	0	2566600	0	258270	0	292550	0	1278000	0	0.88	0	0.87	0	1	0	1	0	1	0	1	0	1	0	1	0	1	0	2	0	1	0	4	0	4	0
Uncharacterized protein YMR295C OS=Saccharomyces cerevisiae (strain ATCC 204508 / S288c) OX=559292 GN=YMR295C PE=1 SV=1	Q03559	YMR295C	22 kDa		unknown	4755200	0	7063400	0	11078000	-1	37273000	0	6882600	-1	17499000	-1	22959000	-1	35634000	-1	13018000	-1	1	0	1	0	1	0	1	0.06	0.95	0	1	0	1	0	1	0	1	0	7	0	10	0	7	0	14	0
RING-box protein HRT1 OS=Saccharomyces cerevisiae (strain ATCC 204508 / S288c) OX=559292 GN=HRT1 PE=1 SV=1	Q08273	HRT1	14 kDa		unknown	12654000	-1	12165000	0	35242000	-1	64869000	-1	37604000	-1	72880000	-1	33207000	-1	114070000	-1	58338000	-1	1	0	1	0	1	0	1	0	1	0	1	0	1	0	1	0	1	0	4	0	4	0	6	0	10	0
tRNA threonylcarbamoyladenosine dehydratase 2 OS=Saccharomyces cerevisiae (strain ATCC 204508 / S288c) OX=559292 GN=TCD2 PE=1 SV=1	P36101	TCD2	50 kDa		unknown	659070	0	741200	0	2796800	0	4664600	0	2872100	0	9225300	0	4491400	0	930930	0	3344400	0	1	0.8	1	0	1	0	1	0	1	0	1	0	1	0	1	0	1	0.11	6	2	6	0	4	0	11	0
V-type proton ATPase subunit a, Golgi isoform OS=Saccharomyces cerevisiae (strain ATCC 204508 / S288c) OX=559292 GN=STV1 PE=1 SV=2	P37296	STV1	102 kDa		unknown	68603	0	971900	0	57413	0	7813900	0	1374900	0	955270	0	69022	0	1747000	0	506710	-1	0.99	0	1	0	0.96	0	1	0	1	0	1	0	0.99	0	1	0	1	0	2	0	9	0	1	0	26	0
Homoisocitrate dehydrogenase, mitochondrial OS=Saccharomyces cerevisiae (strain ATCC 204508 / S288c) OX=559292 GN=LYS12 PE=1 SV=1	P40495	LYS12	40 kDa		unknown	427680	0	245040	0	1775500	0	1657900	0	5465000	0	2031900	0	4058500	0	7405400	0	4173600	-1	1	0	1	0	1	0	1	0	1	0	1	0	1	0	1	0	1	0	5	0	5	0	8	0	7	0
Ribonucleases P/MRP protein subunit POP1 OS=Saccharomyces cerevisiae (strain ATCC 204508 / S288c) OX=559292 GN=POP1 PE=1 SV=1	P41812	POP1	100 kDa		unknown	79892	0	90645	0	286210	0	500730	0	1236000	0	1081200	0	714020	0	1703800	0	556650	0	1	0.27	1	0	1	0	1	0.06	1	0	1	0	1	0	1	0.36	1	0	5	0	5	0	3	0	6	0
Uncharacterized membrane protein YGL140C OS=Saccharomyces cerevisiae (strain ATCC 204508 / S288c) OX=559292 GN=YGL140C PE=1 SV=1	P53120	YGL140C	137 kDa		unknown	174250	0	343930	0	532030	0	373960	0	581430	0	631080	0	1031000	2698000	1454000	0	184430	0	1	0	1	0.34	1	0	1	0.15	1	0.08	1	0.13	1	0.3	1	0.14	1	0	3	0	4	0	6	0	6	0
Alpha,alpha-trehalose-phosphate synthase [UDP-forming] 56 kDa subunit OS=Saccharomyces cerevisiae (strain ATCC 204508 / S288c) OX=559292 GN=TPS1 PE=1 SV=2	Q00764	TPS1	56 kDa		unknown	966510	0	967390	0	2092600	0	1153900	-1	6512000	0	2333300	1820200	2150100	0	659600	0	2853100	0	0.96	0	1	0	1	0	1	0	1	0	1	0.37	1	0.11	1	0	1	0	3	0	5	0	8	0	3	0
Mitochondrial import inner membrane translocase subunit TIM50 OS=Saccharomyces cerevisiae (strain ATCC 204508 / S288c) OX=559292 GN=TIM50 PE=1 SV=1	Q02776	TIM50	55 kDa		unknown	1160200	0	2052500	0	2400000	0	3124300	0	950460	0	2865700	0	2688400	0	1439800	0	3158700	0	1	0	1	0	1	0	1	0	1	0	1	0	1	0	1	0	1	0	7	0	8	0	9	0	10	0
Ferric/cupric reductase transmembrane component 1 OS=Saccharomyces cerevisiae (strain ATCC 204508 / S288c) OX=559292 GN=FRE1 PE=1 SV=1	P32791	FRE1	79 kDa		unknown	2791000	0	3169400	0	1048100	0	2405400	0	1590300	0	4287800	0	885640	-1	6103100	0	3501500	0	1	0.28	1	0	1	0	1	0	1	0	1	0	1	0	1	0	1	0.18	8	0	9	0	4	0	5	0
Ribosome biogenesis protein UTP30 OS=Saccharomyces cerevisiae (strain ATCC 204508 / S288c) OX=559292 GN=UTP30 PE=1 SV=1	P36144	UTP30	32 kDa		unknown	3322700	0	2503300	-1	696140	0	437110	0	556170	-1	4007100	0	4599200	-1	3146100	0	3290000	0	1	0.12	1	0	1	0	0.99	0	1	0	1	0	1	0	1	0	1	0	10	0	9	0	4	0	3	0
Low-affinity Fe(2+) transport protein OS=Saccharomyces cerevisiae (strain ATCC 204508 / S288c) OX=559292 GN=FET4 PE=1 SV=2	P40988	FET4	63 kDa		unknown	329500	662100000	0	361150000	0	164150000	0	179250000	457500	127820000	754770	80569000	168650	68631000	2026100	48986000	1206800	11829000	0.96	0.91	0.95	0.99	0.29	0.78	0	0.86	1	1	1	1	0.96	1	1	1	1	0.98	2	3	1	4	0	3	0	3
Cell division cycle protein CDT1 OS=Saccharomyces cerevisiae (strain ATCC 204508 / S288c) OX=559292 GN=TAH11 PE=1 SV=1	P47112	TAH11	68 kDa		unknown	1112400	0	560640	0	247630	0	937090	0	556630	0	897190	0	398980	0	1912700	0	956940	0	1	0.26	1	0	1	0	1	0	1	0	1	0	1	0	1	0	1	0	10	0	7	0	5	0	6	0
Nucleolar protein 3 OS=Saccharomyces cerevisiae (strain ATCC 204508 / S288c) OX=559292 GN=NPL3 PE=1 SV=1	Q01560	NPL3	45 kDa		unknown	2706100	0	2369800	0	3419500	-1	4184700	0	3794000	0	5649600	0	8346600	-1	3129400	0	5804300	-1	1	0	0.96	0	1	0	1	0	1	0	1	0	1	0	1	0	1	0	7	0	3	0	4	0	5	0
Mitochondrial homologous recombination protein 1 OS=Saccharomyces cerevisiae (strain ATCC 204508 / S288c) OX=559292 GN=MHR1 PE=1 SV=1	Q06630	MHR1	27 kDa		unknown	3830800	0	3664200	0	7427700	0	10738000	0	14754000	-1	6810400	0	10608000	0	238240	0	9852800	0	1	0	1	0	1	0	1	0	1	0	1	0	1	0	0.97	0	1	0	9	0	5	0	8	0	8	0
Ceramide synthase LAG1 OS=Saccharomyces cerevisiae (strain ATCC 204508 / S288c) OX=559292 GN=LAG1 PE=1 SV=1	P38703	LAG1	48 kDa		unknown	828500	0	1345700	0	3706800	0	2814600	0	4860200	0	7115900	0	7881800	0	9527100	0	5949900	0	1	0.06	1	0	1	0	1	0	1	0	1	0	1	0.07	0.97	0	1	0	4	0	8	0	11	0	7	0
DNA mismatch repair protein MSH1, mitochondrial OS=Saccharomyces cerevisiae (strain ATCC 204508 / S288c) OX=559292 GN=MSH1 PE=1 SV=2	P25846	MSH1	109 kDa		unknown	469940	0	676520	0	301080	0	469960	0	0	0	340160	0	494240	0	314630	0	220600	0	1	0.14	1	0	1	0.08	1	0	0.62	0	1	0	1	0	1	0	1	0	13	0	11	0	6	0	9	0
Proteasome subunit beta type-5 OS=Saccharomyces cerevisiae (strain ATCC 204508 / S288c) OX=559292 GN=PRE2 PE=1 SV=3	P30656	PRE2	32 kDa		unknown	2506100	-1	3301600	-1	2897600	0	3236700	-1	7337200	0	6020000	0	8272300	0	2584700	0	4343300	0	1	0	1	0	1	0	1	0	1	0	1	0	1	0	1	0	1	0	4	0	7	0	9	0	4	0
Suppressor protein SRP40 OS=Saccharomyces cerevisiae (strain ATCC 204508 / S288c) OX=559292 GN=SRP40 PE=1 SV=2	P32583	SRP40	41 kDa		unknown	41511000	0	48476000	0	18354000	0	21401000	-1	21531000	-1	60623000	0	46854000	-1	55238000	-1	48696000	-1	1	0	1	0	1	0	1	0	1	0	1	0	1	0	1	0	1	0	13	0	12	0	4	0	6	0
Ribosomal lysine N-methyltransferase 3 OS=Saccharomyces cerevisiae (strain ATCC 204508 / S288c) OX=559292 GN=RKM3 PE=1 SV=1	P38222	RKM3	63 kDa		unknown	1901800	0	807250	0	0	0	2922200	0	2186800	-1	2030700	0	2765900	0	4499500	-1	2947700	0	1	0	1	0	0.99	0	1	0	1	0	1	0	1	0	1	0	1	0	7	0	5	0	1	0	7	0
Ubiquitin carboxyl-terminal hydrolase RPN11 OS=Saccharomyces cerevisiae (strain ATCC 204508 / S288c) OX=559292 GN=RPN11 PE=1 SV=1	P43588	RPN11	34 kDa		unknown	3016600	0	4076500	0	7469000	0	8729200	0	5798500	-1	8947900	0	8319100	0	9003900	0	7662500	0	1	0	1	0	1	0	1	0	1	0	1	0	1	0	1	0	1	0	6	0	7	0	8	0	8	0
Styryl dye vacuolar localization protein 3 OS=Saccharomyces cerevisiae (strain ATCC 204508 / S288c) OX=559292 GN=SVL3 PE=1 SV=1	Q03088	SVL3	92 kDa		unknown	202610	0	978140	0	92912	0	936430	0	4361700	0	3423300	0	2147200	-1	397410	0	1091800	0	0.96	0	1	0	1	0	1	0	1	0	1	0	1	0	0.82	0	1	0	2	0	7	0	2	0	7	0
Uncharacterized protein YDR476C OS=Saccharomyces cerevisiae (strain ATCC 204508 / S288c) OX=559292 GN=YDR476C PE=1 SV=1	Q03362	YDR476C	25 kDa		unknown	16189000	0	17001000	0	18845000	0	10396000	0	17640000	0	20073000	-1	13462000	-1	26745000	0	14703000	0	1	0	1	0	1	0	1	0	1	0	1	0	1	0	1	0	1	0	11	0	11	0	10	0	6	0
Signal peptidase complex subunit SPC2 OS=Saccharomyces cerevisiae (strain ATCC 204508 / S288c) OX=559292 GN=SPC2 PE=1 SV=1	Q04969	SPC2	21 kDa		unknown	8769600	0	4991700	-1	6786000	-1	8538500	0	14743000	0	14560000	0	19640000	0	13834000	0	16307000	0	1	0	1	0	1	0	1	0	1	0	1	0	1	0	1	0	1	0	13	0	6	0	4	0	7	0
Ribosome quality control complex subunit 1 OS=Saccharomyces cerevisiae (strain ATCC 204508 / S288c) OX=559292 GN=RQC1 PE=1 SV=1	Q05468	RQC1	83 kDa		unknown	117810	0	149340	0	0	0	949680	0	2343400	0	1311200	0	1185300	0	1740500	0	696300	0	0.99	0	1	0	0.37	0	1	0.1	1	0	1	0	1	0	1	0	1	0.21	2	0	4	0	1	0	8	0
LETM1 domain-containing protein YLH47, mitochondrial OS=Saccharomyces cerevisiae (strain ATCC 204508 / S288c) OX=559292 GN=YLH47 PE=1 SV=1	Q06493	YLH47	52 kDa		unknown	5090100	0	2958200	0	1354100	0	2388700	0	1274700	0	1428400	0	1200400	0	1228000	0	8659900	0	1	0	1	0	1	0	1	0	1	0	1	0	1	0	1	0	1	0	9	0	11	0	10	0	8	0
Guanine nucleotide-binding protein subunit beta 1 OS=Saccharomyces cerevisiae (strain ATCC 204508 / S288c) OX=559292 GN=GPB1 PE=1 SV=1	Q08886	GPB1	101 kDa		unknown	306510	0	233750	31319000	523690	86086000	225750	0	959800	0	1162100	0	437630	0	661340	0	836480	0	1	0.11	1	0.63	1	0.87	1	0	1	0	1	0	1	0	1	0	1	0	6	0	3	1	4	1	6	0
Diphthine--ammonia ligase OS=Saccharomyces cerevisiae (strain ATCC 204508 / S288c) OX=559292 GN=DPH6 PE=1 SV=1	Q12429	DPH6	78 kDa		unknown	1465600	0	1288200	0	286800	0	1294000	0	1420600	0	1045200	0	1237700	0	4954100	0	1956300	0	1	0.38	1	0	0.96	0	1	0	1	0	1	0	1	0	1	0	1	0	10	0	9	0	2	0	5	0
Glucan 1,3-beta-glucosidase OS=Saccharomyces cerevisiae (strain ATCC 204508 / S288c) OX=559292 GN=BGL2 PE=1 SV=1	P15703	BGL2	34 kDa		unknown	13202000	-1	15380000	-1	31533000	0	25297000	-1	10663000	-1	8528800	0	10238000	-1	16078000	-1	16586000	-1	1	0	1	0	1	0	1	0	1	0	1	0	1	0	1	0	1	0	8	0	9	0	12	0	11	0
Aspartate aminotransferase, cytoplasmic OS=Saccharomyces cerevisiae (strain ATCC 204508 / S288c) OX=559292 GN=AAT2 PE=1 SV=3	P23542	AAT2	46 kDa		unknown	0	0	666430	0	2902500	0	1812500	0	6702500	0	7650500	0	1535300	0	3908400	0	2776800	0	1	0	1	0	1	0	1	0.14	1	0	1	0	1	0	1	0	1	0	2	0	5	0	7	0	5	0
Chromo domain-containing protein 1 OS=Saccharomyces cerevisiae (strain ATCC 204508 / S288c) OX=559292 GN=CHD1 PE=1 SV=1	P32657	CHD1	168 kDa		unknown	954540	0	1991100	0	1003900	0	1312600	0	114980	0	459600	0	182110	0	260610	0	274110	0	1	0	1	0	1	0	1	0.15	1	0	1	0.06	1	0.14	1	0.1	1	0	10	0	8	0	5	0	9	0
Probable phospholipid-transporting ATPase DRS2 OS=Saccharomyces cerevisiae (strain ATCC 204508 / S288c) OX=559292 GN=DRS2 PE=1 SV=2	P39524	DRS2	154 kDa		unknown	195780	0	240800	-1	0	0	643630	0	715000	0	1653100	0	483230	0	737060	0	323160	0	1	0	1	0	1	0	1	0	1	0	1	0	1	0	1	0	1	0	4	0	5	0	3	0	9	0
U2 snRNP component HSH155 OS=Saccharomyces cerevisiae (strain ATCC 204508 / S288c) OX=559292 GN=HSH155 PE=1 SV=1	P49955	HSH155	110 kDa		unknown	690360	0	928100	0	816460	0	1202800	0	368610	0	649790	0	636700	0	1014800	0	750090	0	1	0	1	0	1	0	1	0	1	0	1	0	1	0	1	0	1	0	8	0	10	0	9	0	7	0
Phospholipid-transporting ATPase DNF2 OS=Saccharomyces cerevisiae (strain ATCC 204508 / S288c) OX=559292 GN=DNF2 PE=1 SV=1	Q12675	DNF2	183 kDa	TRUE	unknown	359900	0	586310	0	196220	0	1184000	0	1724300	0	1098100	0	265780	0	1218500	0	518380	0	1	0.68	1	0	0.99	0	1	0	1	0	1	0	1	0	1	0.11	1	0	5	0	7	0	2	0	8	0
Alcohol dehydrogenase 3, mitochondrial OS=Saccharomyces cerevisiae (strain ATCC 204508 / S288c) OX=559292 GN=ADH3 PE=1 SV=2	P07246	ADH3	40 kDa	TRUE	unknown	240100	0	2393400	0	325360	0	0	0	2959900	0	897070	0	4017900	-1	1845000	0	2755200	0	0.57	0.8	0.08	0.18	0.62	0	0.87	0	1	0	1	0	0.99	0	1	0	1	0.19	3	1	4	0	4	0	1	0
Serine/threonine-protein kinase PSK1 OS=Saccharomyces cerevisiae (strain ATCC 204508 / S288c) OX=559292 GN=PSK1 PE=1 SV=2	P31374	PSK1	152 kDa	TRUE	unknown	38064	0	242640	0	345420	0	0	17577000	442460	0	229490	1516000	320880	0	529340	0	363780	0	0.96	0	0.96	0	1	0.12	1	0.14	1	0	1	0.43	1	0	1	0.41	1	0	3	0	3	0	4	0	2	2
Uncharacterized protein YDR089W OS=Saccharomyces cerevisiae (strain ATCC 204508 / S288c) OX=559292 GN=YDR089W PE=1 SV=2	P38966	YDR089W	99 kDa		unknown	141210	0	252830	0	1144900	0	899600	0	501650	0	2256900	0	1748200	0	2327200	0	1924000	0	0.99	0	1	0	1	0	1	0	1	0	1	0	1	0	1	0	1	0	1	0	2	0	7	0	7	0
Spermidine synthase OS=Saccharomyces cerevisiae (strain ATCC 204508 / S288c) OX=559292 GN=SPE3 PE=3 SV=1	Q12074	SPE3	33 kDa		unknown	1167400	0	3828400	-1	3271900	-1	1471800	-1	14403000	-1	8607500	0	4914500	0	11768000	0	8115900	0	1	0	1	0	1	0	1	0	1	0	1	0	1	0	1	0	1	0	4	0	6	0	6	0	3	0
Mitochondrial ornithine transporter 1 OS=Saccharomyces cerevisiae (strain ATCC 204508 / S288c) OX=559292 GN=ORT1 PE=1 SV=2	Q12375	ORT1	32 kDa		unknown	1595500	0	3346000	0	12094000	0	20496000	0	6328100	0	11780000	0	8935400	0	26477000	0	21512000	0	1	0	1	0	1	0	1	0	1	0	1	0	1	0	1	0	1	0	5	0	4	0	7	0	11	0
Ribosome quality control complex subunit 2 OS=Saccharomyces cerevisiae (strain ATCC 204508 / S288c) OX=559292 GN=RQC2 PE=1 SV=1	Q12532	RQC2	119 kDa		unknown	540510	0	215540	0	437490	0	780790	0	2066500	0	192950	0	763270	0	209470	0	140810	0	1	0	1	0	1	0.13	1	0.65	1	0	1	0	1	0.09	1	0.09	1	0	10	0	6	0	6	0	8	0
V-type proton ATPase subunit E OS=Saccharomyces cerevisiae (strain ATCC 204508 / S288c) OX=559292 GN=VMA4 PE=1 SV=4	P22203	VMA4	26 kDa	TRUE	unknown	1091300	0	1678200	0	5042600	0	27309000	0	174190	0	502870	0	5487700	0	10685000	0	6066900	0	1	0	1	0	1	0	1	0	1	0	1	0	1	0	1	0	1	0	8	0	9	0	10	0	16	0
Argininosuccinate synthase OS=Saccharomyces cerevisiae (strain ATCC 204508 / S288c) OX=559292 GN=ARG1 PE=1 SV=3	P22768	ARG1	47 kDa		unknown	1118500	0	1186600	0	2109900	0	1114800	0	4930900	0	2438300	0	1285900	0	3847600	0	4006700	0	1	0.48	1	0.07	1	0.06	1	0.08	1	0.09	1	0	1	0.16	1	0.09	1	0.24	4	0	5	0	7	0	5	0
Replication factor A protein 3 OS=Saccharomyces cerevisiae (strain ATCC 204508 / S288c) OX=559292 GN=RFA3 PE=1 SV=1	P26755	RFA3	14 kDa		unknown	23676000	-1	24089000	0	26191000	-1	40174000	0	20028000	-1	33302000	0	39290000	-1	36513000	-1	35685000	-1	1	0	1	0	1	0	1	0	1	0	1	0	1	0	1	0	1	0	8	0	7	0	7	0	8	0
Uridine kinase OS=Saccharomyces cerevisiae (strain ATCC 204508 / S288c) OX=559292 GN=URK1 PE=1 SV=1	P27515	URK1	56 kDa		unknown	1475000	0	1973400	0	1812100	0	1988300	0	2848300	0	4096300	0	1977200	0	9464000	0	3699500	0	1	0.53	1	0	1	0	0.97	0.22	1	0	1	0	1	0	1	0	1	0	4	0	6	0	4	0	3	0
Dolichyl-phosphate-mannose--protein mannosyltransferase 6 OS=Saccharomyces cerevisiae (strain ATCC 204508 / S288c) OX=559292 GN=PMT6 PE=1 SV=1	P42934	PMT6	88 kDa		unknown	0	0	0	0	1795200	0	857160	0	2044600	0	2719500	0	796950	0	3055900	0	2922800	0	0.96	0	1	0	1	0	1	0	1	0	1	0	1	0	1	0	1	0	1	0	1	0	9	0	5	0
Repressible alkaline phosphatase OS=Saccharomyces cerevisiae (strain ATCC 204508 / S288c) OX=559292 GN=PHO8 PE=1 SV=2	P11491	PHO8	63 kDa		unknown	5646600	0	5956100	-1	15607000	-1	8949700	0	9716500	0	9637300	0	11323000	0	12494000	0	6631000	0	0.87	0	1	0	0.87	0	1	0.06	1	0	1	0	1	0	1	0	1	0	6	0	7	0	9	0	12	0
2-acyl-1-lysophosphatidylinositol acyltransferase OS=Saccharomyces cerevisiae (strain ATCC 204508 / S288c) OX=559292 GN=CST26 PE=1 SV=1	P38226	CST26	46 kDa		unknown	1500800	0	887340	0	1970400	0	3379800	-1	1197000	0	1858200	0	3043700	0	7746600	0	3942600	0	1	0	1	0	1	0	1	0	1	0	1	0	1	0	1	0	1	0	6	0	5	0	8	0	8	0
tRNA (adenine(58)-N(1))-methyltransferase non-catalytic subunit TRM6 OS=Saccharomyces cerevisiae (strain ATCC 204508 / S288c) OX=559292 GN=GCD10 PE=1 SV=1	P41814	GCD10	54 kDa		unknown	1596900	0	5678600	0	5719300	0	6148700	0	6147400	0	3974100	0	4171100	0	1797700	0	4171600	0	1	0	1	0	1	0	1	0	1	0	1	0	1	0	0.97	0	1	0	8	0	9	0	10	0	8	0
Chromatin assembly factor 1 subunit p90 OS=Saccharomyces cerevisiae (strain ATCC 204508 / S288c) OX=559292 GN=RLF2 PE=1 SV=1	Q12495	RLF2	70 kDa		unknown	2831100	0	434940	0	8604100	0	2378000	0	1210800	0	4428900	0	1665200	0	1790800	0	1492200	0	1	0	1	0	1	0	1	0	1	0	1	0	1	0	1	0	1	0	5	0	4	0	7	0	10	0
Eukaryotic translation initiation factor 2 subunit alpha OS=Saccharomyces cerevisiae (strain ATCC 204508 / S288c) OX=559292 GN=SUI2 PE=1 SV=1	P20459	SUI2	35 kDa		unknown	723380	0	1666400	0	341820	0	1809000	0	3193200	0	1511100	0	2070600	0	2291800	0	3166700	14747000	1	0.51	1	0.28	0.96	0.05	1	0.51	1	0	1	0	1	0	1	0	1	0.98	5	0	8	0	1	0	6	0
Proteasome subunit alpha type-2 OS=Saccharomyces cerevisiae (strain ATCC 204508 / S288c) OX=559292 GN=PRE8 PE=1 SV=1	P23639	PRE8	27 kDa		unknown	13148000	0	14940000	0	16006000	0	20302000	0	7391100	-1	13193000	0	13870000	0	6195400	0	24340000	0	1	0	1	0	1	0	1	0	1	0	1	0	1	0	1	0	1	0	9	0	6	0	7	0	8	0
Reduced viability upon starvation protein 161 OS=Saccharomyces cerevisiae (strain ATCC 204508 / S288c) OX=559292 GN=RVS161 PE=1 SV=1	P25343	RVS161	30 kDa		unknown	978660	-1	2653500	0	706310	0	1904900	0	1237000	-1	5450000	0	1897100	-1	2810400	-1	4558000	-1	1	0	1	0	0.57	0	1	0	1	0	1	0	1	0	1	0	1	0	4	0	8	0	3	0	5	0
Transcription elongation factor SPT5 OS=Saccharomyces cerevisiae (strain ATCC 204508 / S288c) OX=559292 GN=SPT5 PE=1 SV=1	P27692	SPT5	116 kDa		unknown	608070	0	630300	0	536760	0	300450	0	586890	0	640470	0	804900	0	43469	0	848100	0	1	0.14	1	0	1	0	1	0	1	0	1	0	1	0	1	0	1	0	10	0	7	0	5	0	8	0
Proteasome subunit beta type-1 OS=Saccharomyces cerevisiae (strain ATCC 204508 / S288c) OX=559292 GN=PRE3 PE=1 SV=2	P38624	PRE3	24 kDa		unknown	8524200	0	7770400	0	9968900	0	3893900	0	7408800	0	9161500	0	8079600	-1	7546100	-1	11692000	0	1	0	1	0	1	0	1	0	1	0	1	0	1	0	1	0	1	0	10	0	7	0	8	0	4	0
Cytochrome c oxidase assembly protein COX15 OS=Saccharomyces cerevisiae (strain ATCC 204508 / S288c) OX=559292 GN=COX15 PE=3 SV=1	P40086	COX15	55 kDa		unknown	2111800	0	4473000	0	7063200	0	6924400	0	7324200	0	5033800	0	4322900	0	3557000	0	5401600	0	1	0	1	0	1	0	1	0	1	0	1	0	1	0	1	0	1	0	7	0	8	0	11	0	6	0
Protein-lysine N-methyltransferase EFM5 OS=Saccharomyces cerevisiae (strain ATCC 204508 / S288c) OX=559292 GN=EFM5 PE=1 SV=2	P53200	EFM5	29 kDa		unknown	13202000	-1	8679900	0	7058400	-1	7371400	-1	10241000	-1	5425100	-1	5686600	-1	10509000	-1	7629900	0	1	0	1	0	1	0	1	0	1	0	1	0	1	0	1	0	1	0	13	0	8	0	6	0	9	0
Ribonuclease P protein component, mitochondrial OS=Saccharomyces cerevisiae (strain ATCC 204508 / S288c) OX=559292 GN=RPM2 PE=1 SV=1	Q02773	RPM2	139 kDa		unknown	54100	0	62747	0	0	0	888900	0	739150	0	842250	0	368400	0	401000	0	350150	0	1	0.49	0.96	0	1	0	1	0	1	0	1	0	1	0	1	0	1	0.09	3	0	2	0	4	0	8	0
37S ribosomal protein S10, mitochondrial OS=Saccharomyces cerevisiae (strain ATCC 204508 / S288c) OX=559292 GN=RSM10 PE=1 SV=1	Q03201	RSM10	23 kDa		unknown	12842000	-1	10660000	-1	13884000	-1	13939000	0	12120000	-1	9343800	0	7714200	0	1191600	0	13582000	0	1	0	1	0	1	0	1	0	1	0	1	0	1	0	1	0	1	0	10	0	6	0	6	0	8	0
ATP synthase subunit e, mitochondrial OS=Saccharomyces cerevisiae (strain ATCC 204508 / S288c) OX=559292 GN=TIM11 PE=1 SV=2	P81449	TIM11	11 kDa		unknown	11734000	0	8865100	0	27048000	0	41759000	-1	20250000	-1	23050000	-1	28416000	-1	16626000	0	28226000	-1	1	0	1	0	1	0	1	0	1	0	1	0	1	0	1	0	1	0	8	0	5	0	8	0	11	0
Prephenate dehydrogenase [NADP(+)] OS=Saccharomyces cerevisiae (strain ATCC 204508 / S288c) OX=559292 GN=TYR1 PE=1 SV=2	P20049	TYR1	51 kDa		unknown	2087800	0	2315700	0	1596300	-1	1681000	0	4802400	0	3089500	0	1762500	-1	3414000	0	3341100	0	1	0	1	0.11	1	0	1	0	1	0.07	1	0	1	0	1	0	1	0	6	0	8	0	6	0	4	0
Single-strand telomeric DNA-binding protein GBP2 OS=Saccharomyces cerevisiae (strain ATCC 204508 / S288c) OX=559292 GN=GBP2 PE=1 SV=1	P25555	GBP2	49 kDa		unknown	3067100	0	3834800	-1	1772700	-1	1846000	-1	7710100	-1	3380100	0	4076400	0	11933000	0	4678900	0	1	0.4	1	0	1	0	1	0	1	0	1	0	1	0	1	0.05	1	0	6	0	6	0	4	0	4	0
Protein PDC2 OS=Saccharomyces cerevisiae (strain ATCC 204508 / S288c) OX=559292 GN=PDC2 PE=1 SV=2	P32896	PDC2	104 kDa		unknown	532440	0	254940	0	638800	0	1211300	0	637820	0	1240000	0	1601800	0	1638700	0	1036900	0	0.96	0	1	0	1	0	1	0	1	0	1	0	1	0	1	0	1	0	3	0	3	0	4	0	6	0
Pre-rRNA-processing protein IPI1 OS=Saccharomyces cerevisiae (strain ATCC 204508 / S288c) OX=559292 GN=IPI1 PE=1 SV=1	P38803	IPI1	38 kDa		unknown	927540	-1	1546100	0	3738500	0	2006100	-1	1060200	0	4805900	0	3655900	-1	3154500	0	2518300	0	1	0	1	0	1	0	1	0	1	0	1	0	1	0	1	0	1	0	5	0	7	0	10	0	6	0
Vacuolar protein sorting-associated protein 74 OS=Saccharomyces cerevisiae (strain ATCC 204508 / S288c) OX=559292 GN=VPS74 PE=1 SV=1	Q06385	VPS74	39 kDa		unknown	2787000	0	1848400	0	2352700	0	3543800	0	3454500	0	5939300	0	5858000	0	4417000	0	5840500	0	1	0	1	0	1	0	1	0	1	0	1	0	1	0	1	0	1	0	9	0	7	0	7	0	7	0
Serine/threonine-protein phosphatase PP1-1 OS=Saccharomyces cerevisiae (strain ATCC 204508 / S288c) OX=559292 GN=SIT4 PE=1 SV=1	P20604	SIT4	36 kDa		unknown	1752800	0	2491300	0	2296800	0	1801100	0	3761300	-1	2623300	-1	2284500	-1	5463000	0	3075700	-1	1	0	1	0	1	0	1	0	1	0	1	0	1	0	1	0	1	0	7	0	6	0	6	0	3	0
Catabolic L-serine/threonine dehydratase OS=Saccharomyces cerevisiae (strain ATCC 204508 / S288c) OX=559292 GN=CHA1 PE=1 SV=2	P25379	CHA1	39 kDa		unknown	5857100	0	6183200	0	6064200	0	2055300	0	1017400	0	2294500	0	4374700	0	2091200	0	1512200	0	1	0	1	0	1	0	1	0	1	0	1	0	1	0	1	0	1	0	13	0	11	0	12	0	5	0
V-type proton ATPase subunit D OS=Saccharomyces cerevisiae (strain ATCC 204508 / S288c) OX=559292 GN=VMA8 PE=1 SV=1	P32610	VMA8	29 kDa		unknown	2554000	0	3917200	0	2103300	0	5706100	0	8108000	0	7240400	0	11356000	0	13222000	0	8100200	0	1	0	1	0	1	0	1	0	1	0	1	0	1	0	1	0	1	0	4	0	4	0	5	0	7	0
Putative glycosyltransferase HOC1 OS=Saccharomyces cerevisiae (strain ATCC 204508 / S288c) OX=559292 GN=HOC1 PE=1 SV=3	P47124	HOC1	46 kDa		unknown	1530800	0	9075900	-1	2240000	-1	35306000	0	3309000	-1	4401100	0	4740700	-1	6530500	-1	5244100	-1	1	0	1	0	1	0	1	0	1	0	1	0	1	0	1	0	1	0	3	0	8	0	5	0	16	0
Endoplasmic reticulum vesicle protein 25 OS=Saccharomyces cerevisiae (strain ATCC 204508 / S288c) OX=559292 GN=ERV25 PE=1 SV=1	P54837	ERV25	24 kDa		unknown	13167000	0	4824800	-1	0	-1	16317000	0	11008000	0	2613700	0	11165000	0	8499500	-1	5736100	-1	1	0	1	0	0.96	0	1	0.11	1	0	1	0	1	0	1	0	1	0	10	0	5	0	1	0	13	0
54S ribosomal protein L1, mitochondrial OS=Saccharomyces cerevisiae (strain ATCC 204508 / S288c) OX=559292 GN=MRPL1 PE=1 SV=1	Q04599	MRPL1	31 kDa		unknown	2325200	0	1844200	0	667530	0	6743200	0	2726700	0	784570	0	4247300	0	5389600	0	3870300	0	1	0	1	0	1	0	1	0	1	0	1	0	1	0	1	0	1	0.21	6	0	6	0	8	0	9	0
DNA primase small subunit OS=Saccharomyces cerevisiae (strain ATCC 204508 / S288c) OX=559292 GN=PRI1 PE=1 SV=2	P10363	PRI1	48 kDa		unknown	516600	0	424290	0	1154600	0	1425500	-1	1420400	0	3484200	0	1073000	0	3571300	0	3779400	0	1	0	1	0	1	0.06	1	0	1	0	1	0	1	0	1	0	1	0	5	0	6	0	6	0	6	0
Membrane protein PTM1 OS=Saccharomyces cerevisiae (strain ATCC 204508 / S288c) OX=559292 GN=PTM1 PE=1 SV=2	P32857	PTM1	60 kDa		unknown	4300000	0	4722200	0	3654100	0	8731700	-1	9931500	0	8538600	0	6652400	0	3961500	0	8427100	0	1	0.06	1	0	1	0	1	0	1	0	1	0	1	0	0.97	0	1	0	6	0	7	0	4	0	7	0
DNA polymerase alpha subunit B OS=Saccharomyces cerevisiae (strain ATCC 204508 / S288c) OX=559292 GN=POL12 PE=1 SV=1	P38121	POL12	79 kDa		unknown	462220	0	758160	0	932300	0	1722700	0	1346100	0	639260	0	368260	0	831150	0	1613100	0	1	0	1	0	1	0	1	0	1	0	1	0.11	1	0	1	0	1	0	4	0	7	0	10	0	8	0
ATP-dependent RNA helicase DBP6 OS=Saccharomyces cerevisiae (strain ATCC 204508 / S288c) OX=559292 GN=DBP6 PE=1 SV=1	P53734	DBP6	70 kDa		unknown	2264100	0	1609900	0	306370	0	1467400	0	229210	0	2896900	0	1635000	0	0	0	1412500	0	1	0.09	1	0	1	0	1	0	0.95	0	1	0	1	0	0.99	0	1	0	11	0	11	0	4	0	8	0
Conserved oligomeric Golgi complex subunit 6 OS=Saccharomyces cerevisiae (strain ATCC 204508 / S288c) OX=559292 GN=COG6 PE=1 SV=1	P53959	COG6	97 kDa		unknown	1083000	0	1931600	0	636580	0	685730	0	293320	55342000	796610	0	0	0	109300	0	393490	0	1	0	1	0.88	1	0.79	1	0	1	0.43	1	0	0.97	0	0.99	0	1	0	14	0	13	1	8	1	5	0
Ribosomal RNA-processing protein 14 OS=Saccharomyces cerevisiae (strain ATCC 204508 / S288c) OX=559292 GN=RRP14 PE=1 SV=1	P36080	RRP14	50 kDa		unknown	5322100	0	4186600	0	1754000	0	1286400	0	3427900	0	4699000	0	2163500	0	120680	0	1593800	0	1	0.79	1	0	1	0	1	0	1	0	1	0	1	0.08	0.97	0	1	0	10	1	11	0	3	0	7	0
Inositol phosphosphingolipids phospholipase C OS=Saccharomyces cerevisiae (strain ATCC 204508 / S288c) OX=559292 GN=ISC1 PE=1 SV=1	P40015	ISC1	54 kDa		unknown	194460	-1	1660400	0	3107300	0	1574700	0	1217400	0	7086100	0	3870200	0	2734000	0	4091300	0	0.96	0	1	0	1	0	1	0	1	0	1	0	1	0	1	0	1	0	2	0	7	0	3	0	6	0
Small nuclear ribonucleoprotein-associated protein B OS=Saccharomyces cerevisiae (strain ATCC 204508 / S288c) OX=559292 GN=SMB1 PE=1 SV=1	P40018	SMB1	22 kDa		unknown	0	0	736630	0	0	0	2717200	-1	9104800	0	3933200	0	4471800	0	4415300	-1	6057500	0	1	0	1	0	1	0	1	0	1	0	1	0	1	0	1	0	1	0	4	0	6	0	3	0	7	0
Elongation of fatty acids protein 3 OS=Saccharomyces cerevisiae (strain ATCC 204508 / S288c) OX=559292 GN=ELO3 PE=1 SV=1	P40319	ELO3	39 kDa		unknown	793910	0	2680200	0	6554500	0	4334900	0	22798000	0	21351000	0	14173000	0	38765000	-1	21874000	0	1	0.21	1	0	1	0	1	0	1	0	1	0	1	0	1	0	1	0	3	0	4	0	6	0	3	0
Deoxyhypusine hydroxylase OS=Saccharomyces cerevisiae (strain ATCC 204508 / S288c) OX=559292 GN=LIA1 PE=1 SV=1	P47120	LIA1	36 kDa		unknown	2519500	63234000	4073700	0	2789400	0	2486700	0	5690000	0	1842500	-1	1655900	0	3787400	-1	1374100	-1	1	0.9	1	0	1	0	1	0	1	0	1	0	1	0	1	0	1	0	7	1	10	0	6	0	7	0
Origin recognition complex subunit 5 OS=Saccharomyces cerevisiae (strain ATCC 204508 / S288c) OX=559292 GN=ORC5 PE=1 SV=1	P50874	ORC5	55 kDa		unknown	643300	0	1129000	0	2436800	0	3296100	0	515510	0	3083900	0	1970900	0	2570500	0	3332900	0	1	0	1	0	1	0	1	0	1	0	1	0	1	0	1	0	1	0	3	0	5	0	7	0	10	0
Pyridoxal 5'-phosphate synthase subunit SNO1 OS=Saccharomyces cerevisiae (strain ATCC 204508 / S288c) OX=559292 GN=SNO1 PE=1 SV=1	Q03144	SNO1	25 kDa	TRUE	unknown	3359800	0	3813400	0	10778000	0	7993400	0	32787000	0	17449000	0	4572800	0	23301000	0	12857000	0	0.87	0	0.85	0	1	0	1	0	1	0	1	0	1	0	1	0	1	0	3	0	3	0	7	0	5	0
Protein N-terminal and lysine N-methyltransferase EFM7 OS=Saccharomyces cerevisiae (strain ATCC 204508 / S288c) OX=559292 GN=NNT1 PE=1 SV=1	Q05874	NNT1	30 kDa		unknown	254750000	0	13431000	0	6453700	-1	1713500	0	17774000	0	13894000	-1	16642000	0	14726000	0	12633000	0	1	0	1	0	0.96	0	0.96	0	1	0	1	0	1	0	1	0	1	0	12	0	9	0	3	0	2	0
Urea amidolyase OS=Saccharomyces cerevisiae (strain ATCC 204508 / S288c) OX=559292 GN=DUR1,2 PE=1 SV=2	P32528	DUR1	202 kDa		unknown	251610	0	277630	0	53401	0	82672	0	411610	0	767850	0	66718	0	126260	0	64452	0	1	0	1	0	1	0	0.98	0.12	1	0	1	0	1	0	1	0	1	0	8	0	5	0	3	0	4	0
Peptide transporter PTR2 OS=Saccharomyces cerevisiae (strain ATCC 204508 / S288c) OX=559292 GN=PTR2 PE=1 SV=2	P32901	PTR2	68 kDa		unknown	2552000	0	2117200	-1	2628400	0	3699400	0	689310	0	4666700	-1	3223400	0	8156500	0	7431900	0	1	0	1	0	1	0	1	0	1	0	1	0	1	0	1	0	1	0	8	0	3	0	6	0	6	0
Tyrosine--tRNA ligase, cytoplasmic OS=Saccharomyces cerevisiae (strain ATCC 204508 / S288c) OX=559292 GN=TYS1 PE=1 SV=3	P36421	TYS1	44 kDa		unknown	986280	0	586650	0	862820	0	711600	0	4024900	0	3260000	0	1005100	0	17898000	0	1689000	0	1	0	1	0	0.95	0	0.88	0	1	0	1	0	1	0	1	0	1	0	5	0	2	0	2	0	2	0
DNA mismatch repair protein HSM3 OS=Saccharomyces cerevisiae (strain ATCC 204508 / S288c) OX=559292 GN=HSM3 PE=1 SV=1	P38348	HSM3	56 kDa		unknown	0	0	112730	0	539350	0	928070	0	3789100	0	2442700	0	1094000	6904300	1049300	0	1813400	0	0	0	0.79	0.11	0.99	0	1	0.09	1	0	1	0	1	0.3	1	0.17	1	0	0	0	1	0	3	0	8	0
Structural maintenance of chromosomes protein 2 OS=Saccharomyces cerevisiae (strain ATCC 204508 / S288c) OX=559292 GN=SMC2 PE=1 SV=1	P38989	SMC2	134 kDa		unknown	464260	0	86609	0	223530	0	1059300	0	115120	0	281360	0	126820	0	3702500	0	94517	0	1	0.37	1	0	1	0	1	0.31	1	0	1	0.11	1	0	1	0	1	0.31	8	0	2	0	3	0	11	0
Signal peptidase complex subunit SPC3 OS=Saccharomyces cerevisiae (strain ATCC 204508 / S288c) OX=559292 GN=SPC3 PE=1 SV=1	Q12133	SPC3	21 kDa		unknown	8269000	0	5091700	0	996130	0	2276500	0	12443000	0	11212000	0	12418000	0	44075000	0	11848000	0	1	0	1	0	0.99	0	1	0	1	0	1	0	1	0	1	0	1	0	6	0	6	0	3	0	4	0
Sphingolipid long chain base-responsive protein LSP1 OS=Saccharomyces cerevisiae (strain ATCC 204508 / S288c) OX=559292 GN=LSP1 PE=1 SV=1	Q12230	LSP1	38 kDa	TRUE	unknown	2258200	0	7653500	0	4199800	-1	6135800	-1	14441000	0	6301200	-1	5879300	0	2047600	0	3256200	0	1	0	1	0	1	0	1	0	1	0	1	0	1	0	1	0	1	0	6	0	8	0	8	0	7	0
Heat shock protein 42 OS=Saccharomyces cerevisiae (strain ATCC 204508 / S288c) OX=559292 GN=HSP42 PE=1 SV=1	Q12329	HSP42	43 kDa		unknown	147460	0	0	-1	6494300	0	6876100	0	11355000	0	1175400	0	2849200	0	1676700	0	918390	0	0.96	0	0.95	0	1	0	1	0	1	0	1	0.11	1	0	1	0	1	0	2	0	1	0	8	0	14	0
Low-affinity phosphate transporter PHO90 OS=Saccharomyces cerevisiae (strain ATCC 204508 / S288c) OX=559292 GN=PHO90 PE=1 SV=1	P39535	PHO90	98 kDa	TRUE	unknown	1158200	0	961490	0	650100	0	397740	0	7659300	0	2313700	0	652510	0	12204000	0	1438700	0	1	0.35	0.99	0	0.96	0	0.98	0	1	0	1	0	1	0	1	0	1	0	6	0	5	0	5	0	3	0
Cluster of VPS10 homolog 1 OS=Saccharomyces cerevisiae (strain ATCC 204508 / S288c) OX=559292 GN=VTH1 PE=1 SV=1 (P40438)	P40438 [2]	VTH1	174 kDa	TRUE	unknown	0	0	0	0	0	0	325850	0	130610	0	0	0	0	0	503450	0	362370	0	0.88	0.23	0.13	0	0.99	0.44	1	0.37	1	0	1	0	0.42	0	1	0.06	1	0	5	0	4	0	7	0	9	0
Beta-glucan synthesis-associated protein KRE6 OS=Saccharomyces cerevisiae (strain ATCC 204508 / S288c) OX=559292 GN=KRE6 PE=1 SV=2	P32486	KRE6	80 kDa	TRUE	unknown	582670	-1	559440	0	1000400	0	4232700	0	2211800	-1	3165900	0	1452100	-1	3058100	0	3840800	0	1	0	1	0	1	0	1	0	1	0	1	0	1	0	1	0	1	0	5	0	5	0	6	0	13	0
UTP--glucose-1-phosphate uridylyltransferase OS=Saccharomyces cerevisiae (strain ATCC 204508 / S288c) OX=559292 GN=UGP1 PE=1 SV=1	P32861	UGP1	56 kDa		unknown	3815100	0	4124500	0	378420	0	1601100	0	887940	0	1445900	0	2343300	0	2165400	0	292000	0	1	0	1	0	0.99	0.17	1	0	1	0	1	0	1	0	1	0	1	0	5	0	6	0	2	0	6	0
U3 small nucleolar ribonucleoprotein protein LCP5 OS=Saccharomyces cerevisiae (strain ATCC 204508 / S288c) OX=559292 GN=LCP5 PE=1 SV=1	P40079	LCP5	41 kDa		unknown	2583300	0	2961200	-1	2437100	-1	4033400	0	3093200	0	3211300	0	4358500	0	1613800	0	1544400	0	0.99	0	1	0	1	0	1	0	1	0.45	1	0	1	0.25	1	0	1	0	6	0	8	0	8	0	10	0
Protein ERP1 OS=Saccharomyces cerevisiae (strain ATCC 204508 / S288c) OX=559292 GN=ERP1 PE=1 SV=1	Q05359	ERP1	25 kDa		unknown	5741200	-1	4993700	0	7121400	0	54554000	-1	6032400	-1	17304000	0	14622000	0	12144000	0	12619000	0	1	0	1	0	1	0	1	0	1	0	1	0	1	0	1	0	1	0	6	0	7	0	6	0	9	0
Protoplast secreted protein 2 OS=Saccharomyces cerevisiae (strain ATCC 204508 / S288c) OX=559292 GN=PST2 PE=1 SV=1	Q12335	PST2	21 kDa		unknown	11595000	-1	6569200	-1	822640	-1	2066800	-1	7209900	-1	3368500	-1	12730000	0	12633000	0	15416000	0	1	0	1	0	1	0	1	0	1	0	1	0	1	0	1	0	1	0	10	0	7	0	5	0	5	0
AP-2 complex subunit mu OS=Saccharomyces cerevisiae (strain ATCC 204508 / S288c) OX=559292 GN=APM4 PE=1 SV=1	Q99186	APM4	55 kDa		unknown	446300	0	0	0	247640	0	121540	0	1784800	0	2312800	0	2213900	0	5503400	0	1590800	0	0.96	0	0.78	0	0.91	0	1	0	1	0	1	0	1	0	1	0	1	0	2	0	1	0	1	0	6	0
Cluster of Ribosome biogenesis protein SSF1 OS=Saccharomyces cerevisiae (strain ATCC 204508 / S288c) OX=559292 GN=SSF1 PE=1 SV=1 (P38789)	P38789 [2]	SSF1	52 kDa	TRUE	unknown	2244100	-1	2327800	0	562820	0	2532900	0	0	0	4386700	0	5339300	0	2851600	0	1595900	0	1	0	1	0	1	0	1	0	0.95	0	1	0	1	0	1	0	1	0	9	0	6	0	3	0	5	0
Pheromone-processing carboxypeptidase KEX1 OS=Saccharomyces cerevisiae (strain ATCC 204508 / S288c) OX=559292 GN=KEX1 PE=1 SV=1	P09620	KEX1	82 kDa		unknown	0	0	95485	0	150360	0	565800	0	1811300	0	1894200	0	873730	-1	1994600	-1	1935000	0	0.93	0.11	0.96	0	0.96	0	1	0	1	0	1	0	1	0	1	0	1	0	2	0	2	0	2	0	6	0
THO complex subunit HPR1 OS=Saccharomyces cerevisiae (strain ATCC 204508 / S288c) OX=559292 GN=HPR1 PE=1 SV=2	P17629	HPR1	88 kDa		unknown	253380	0	454750	0	280680	0	724550	0	831800	0	991130	0	293330	0	446110	0	444830	0	1	0	1	0	1	0	1	0	1	0	1	0	1	0	1	0	1	0	6	0	6	0	5	0	11	0
Chorismate synthase OS=Saccharomyces cerevisiae (strain ATCC 204508 / S288c) OX=559292 GN=ARO2 PE=1 SV=1	P28777	ARO2	41 kDa		unknown	1890000	0	1510900	0	869510	0	2128900	0	5637200	0	2785500	0	3823400	0	6914100	0	1981500	0	1	0	1	0	0.96	0	1	0	1	0	1	0	1	0	1	0	1	0	5	0	6	0	3	0	4	0
Cell division control protein 3 OS=Saccharomyces cerevisiae (strain ATCC 204508 / S288c) OX=559292 GN=CDC3 PE=1 SV=3	P32457	CDC3	60 kDa		unknown	0	0	361620	0	347220	0	179520	0	2839700	0	1529300	0	4608700	0	1639600	-1	1725800	0	0.99	0	1	0	1	0	1	0	1	0	1	0	1	0	1	0	1	0	2	0	2	0	2	0	5	0
Protein SOF1 OS=Saccharomyces cerevisiae (strain ATCC 204508 / S288c) OX=559292 GN=SOF1 PE=1 SV=1	P33750	SOF1	57 kDa		unknown	1534600	0	2199100	0	888240	0	858700	0	1904400	0	1624200	0	4998200	0	6143800	0	1293800	0	1	0.05	1	0	1	0	1	0	1	0	1	0	1	0	1	0	1	0.07	4	0	7	0	4	0	5	0
Protein GVP36 OS=Saccharomyces cerevisiae (strain ATCC 204508 / S288c) OX=559292 GN=GVP36 PE=1 SV=1	P40531	GVP36	37 kDa		unknown	759110	0	2544900	0	2420700	-1	2038600	0	611510	0	2715300	0	3311500	0	2245000	0	2096100	0	1	0	1	0	1	0	1	0	1	0	1	0	1	0	1	0.19	1	0	6	0	9	0	6	0	3	0
Protein EBS1 OS=Saccharomyces cerevisiae (strain ATCC 204508 / S288c) OX=559292 GN=EBS1 PE=3 SV=1	Q03466	EBS1	100 kDa		unknown	0	0	843850	0	145570	0	1725300	0	577010	0	2183300	0	751870	0	1814800	0	1856800	0	0.21	0	1	0	0.84	0	1	0	1	0	1	0	1	0.06	1	0	1	0	0	0	4	0	1	0	4	0
Protein FMP42 OS=Saccharomyces cerevisiae (strain ATCC 204508 / S288c) OX=559292 GN=FMP42 PE=1 SV=1	Q04991	FMP42	56 kDa		unknown	191980	0	847590	0	1127500	0	580680	0	368440	0	4138000	0	3150400	-1	8566100	-1	2802800	0	0.94	0	1	0	1	0	1	0.05	1	0	1	0.05	1	0	1	0	1	0	2	0	2	0	8	0	6	0
Actin-related protein 7 OS=Saccharomyces cerevisiae (strain ATCC 204508 / S288c) OX=559292 GN=ARP7 PE=1 SV=1	Q12406	ARP7	54 kDa		unknown	583970	0	694100	0	853900	0	952140	0	1160200	0	1371500	0	1186000	0	2432100	0	1738000	0	1	0	1	0	1	0.05	1	0	1	0	1	0	1	0	1	0	1	0	8	0	5	0	4	0	6	0
Nuclear and cytoplasmic polyadenylated RNA-binding protein PUB1 OS=Saccharomyces cerevisiae (strain ATCC 204508 / S288c) OX=559292 GN=PUB1 PE=1 SV=4	P32588	PUB1	51 kDa		unknown	11888000	-1	13355000	0	13549000	-1	28775000	-1	38563000	-1	35247000	0	24099000	0	49777000	0	29707000	0	1	0	1	0	1	0	1	0	1	0	1	0	1	0.95	1	0.06	1	0.09	5	0	4	0	4	0	8	0
DNA-directed RNA polymerases I and III subunit RPAC2 OS=Saccharomyces cerevisiae (strain ATCC 204508 / S288c) OX=559292 GN=RPC19 PE=1 SV=1	P28000	RPC19	16 kDa		unknown	12847000	-1	18596000	0	12818000	0	14229000	0	3310300	-1	8215200	0	23123000	-1	21974000	0	22299000	-1	1	0	1	0	1	0	1	0	0.95	0	1	0	1	0	1	0	1	0	10	0	10	0	6	0	5	0
Mitochondrial import receptor subunit TOM20 OS=Saccharomyces cerevisiae (strain ATCC 204508 / S288c) OX=559292 GN=TOM20 PE=1 SV=1	P35180	TOM20	20 kDa		unknown	12495000	0	12333000	-1	11108000	-1	23664000	0	3393200	0	6476100	-1	11742000	-1	0	0	14275000	0	1	0	1	0	1	0	1	0	0.95	0	0.96	0	1	0	0	0	1	0	10	0	10	0	9	0	12	0
Cell division control protein 1 OS=Saccharomyces cerevisiae (strain ATCC 204508 / S288c) OX=559292 GN=CDC1 PE=1 SV=2	P40986	CDC1	57 kDa		unknown	491900	0	1355800	0	449330	0	8550100	0	2663200	0	1274200	0	570760	-1	3379300	0	5050500	0	0.96	0	1	0	0.99	0	1	0	1	0	1	0	1	0	1	0	1	0	1	0	4	0	1	0	8	0
Proteasome subunit beta type-2 OS=Saccharomyces cerevisiae (strain ATCC 204508 / S288c) OX=559292 GN=PUP1 PE=1 SV=1	P25043	PUP1	28 kDa		unknown	4628100	0	7699500	-1	14480000	-1	4410500	-1	5473700	0	9399900	0	7626700	-1	7918100	-1	7389200	0	1	0	1	0	1	0	1	0	1	0	1	0	1	0	1	0	1	0	5	0	7	0	9	0	5	0
Chromatin structure-remodeling complex subunit RSC7 OS=Saccharomyces cerevisiae (strain ATCC 204508 / S288c) OX=559292 GN=NPL6 PE=1 SV=1	P32832	NPL6	50 kDa		unknown	1365100	-1	1720800	0	2403200	0	1082200	0	2049200	0	2217100	-1	0	0	589760	0	1970400	-1	1	0	1	0	1	0	1	0	1	0	1	0	0.96	0	1	0	1	0	10	0	9	0	6	0	7	0
Ypt/Rab-type GTPase YPT7 OS=Saccharomyces cerevisiae (strain ATCC 204508 / S288c) OX=559292 GN=YPT7 PE=1 SV=1	P32939	YPT7	23 kDa		unknown	4868200	0	4951700	0	785200	0	6699800	0	3522400	-1	6210200	0	5902200	-1	9841800	0	7033200	-1	1	0	1	0	0.84	0	1	0	1	0	1	0	1	0	1	0	1	0	7	0	9	0	2	0	5	0
AP-1 complex subunit beta-1 OS=Saccharomyces cerevisiae (strain ATCC 204508 / S288c) OX=559292 GN=APL2 PE=1 SV=1	P36000	APL2	82 kDa		unknown	0	0	563310	0	0	0	440770	0	2100500	0	1987700	0	557030	0	627720	0	508110	0	0.13	0	1	0	0.21	0	1	0	1	0	1	0	1	0	1	0	1	0	0	0	4	0	0	0	4	0
Cohesin subunit SCC3 OS=Saccharomyces cerevisiae (strain ATCC 204508 / S288c) OX=559292 GN=IRR1 PE=1 SV=1	P40541	IRR1	133 kDa		unknown	207650	0	192380	0	388050	0	459250	0	279600	0	655540	0	126280	0	1753000	0	684970	0	0.96	0.92	1	0.97	1	0.21	1	0.5	1	0	1	0	1	0.85	1	0	1	0.88	3	2	4	1	4	0	5	0
Mitochondrial 37S ribosomal protein S27 OS=Saccharomyces cerevisiae (strain ATCC 204508 / S288c) OX=559292 GN=RSM27 PE=1 SV=1	P53305	RSM27	12 kDa		unknown	35876000	0	13704000	-1	18320000	0	13005000	-1	19240000	0	12290000	-1	14247000	0	17723000	0	20370000	-1	1	0	1	0	1	0	1	0	1	0	1	0	1	0	1	0	1	0	10	0	6	0	6	0	5	0
Sorting assembly machinery 50 kDa subunit OS=Saccharomyces cerevisiae (strain ATCC 204508 / S288c) OX=559292 GN=SAM50 PE=1 SV=1	P53969	SAM50	54 kDa		unknown	224260	0	400150	0	573830	-1	798840	0	637870	0	1046500	0	1612700	0	2844900	0	2629400	0	0.96	0	1	0	1	0	1	0	1	0.05	1	0	1	0	1	0	1	0	3	0	6	0	5	0	5	0
Regulator of ribosome biosynthesis OS=Saccharomyces cerevisiae (strain ATCC 204508 / S288c) OX=559292 GN=RRS1 PE=1 SV=1	Q08746	RRS1	23 kDa		unknown	16615000	0	16712000	0	1288600	-1	5697000	0	3821800	-1	7193300	0	7469900	-1	3982100	0	8768600	-1	1	0	1	0	1	0	1	0	1	0	1	0	1	0	0.97	0	1	0	17	0	11	0	3	0	4	0
Actin-like protein ARP8 OS=Saccharomyces cerevisiae (strain ATCC 204508 / S288c) OX=559292 GN=ARP8 PE=1 SV=1	Q12386	ARP8	100 kDa		unknown	144080	-1	419700	-1	455900	0	2052900	-1	353920	-1	996390	0	0	0	743240	0	569710	0	1	0	1	0	1	0	1	0	1	0	1	0	1	0	1	0.06	1	0	4	0	5	0	3	0	16	0
Protein DSS4 OS=Saccharomyces cerevisiae (strain ATCC 204508 / S288c) OX=559292 GN=DSS4 PE=1 SV=2	P32601	DSS4	16 kDa		unknown	5605600	0	6255200	-1	15236000	0	15337000	-1	10306000	0	25149000	-1	8808700	-1	946970	0	18488000	-1	1	0	1	0	1	0	1	0	1	0	1	0	1	0	1	0	1	0	9	0	6	0	6	0	7	0
Transcription initiation factor TFIID subunit 14 OS=Saccharomyces cerevisiae (strain ATCC 204508 / S288c) OX=559292 GN=TAF14 PE=1 SV=1	P35189	TAF14	27 kDa		unknown	2343700	0	4979200	0	5561100	0	6047100	0	3217100	0	404470000	0	3055300	0	3583200	0	2749300	-1	0.99	0	1	0	1	0	1	0	1	0	1	0	1	0	1	0	1	0	5	0	8	0	8	0	7	0
DNA-directed RNA polymerase II subunit RPB3 OS=Saccharomyces cerevisiae (strain ATCC 204508 / S288c) OX=559292 GN=RPB3 PE=1 SV=2	P16370	RPB3	35 kDa		unknown	283040	-1	479020	0	1417500	0	2688000	-1	1759300	0	3532800	0	3247100	0	3999500	0	4779500	0	1	0	1	0	1	0	1	0	1	0	1	0	1	0	1	0.23	1	0	4	0	4	0	8	0	7	0
Cell division control protein 12 OS=Saccharomyces cerevisiae (strain ATCC 204508 / S288c) OX=559292 GN=CDC12 PE=1 SV=1	P32468	CDC12	47 kDa		unknown	1332100	-1	2299200	0	259470	0	677880	0	743000	0	1024200	0	2999700	0	512140	0	1786900	0	1	0	1	0	0.96	0	1	0	1	0	1	0	1	0	1	0	1	0.09	8	0	8	0	2	0	4	0
L-threo-3-hydroxyaspartate ammonia-lyase OS=Saccharomyces cerevisiae (strain ATCC 204508 / S288c) OX=559292 GN=SRY1 PE=1 SV=1	P36007	SRY1	35 kDa		unknown	0	0	0	0	1239400	0	392310	0	166130	-1	7828600	-1	165050	0	20375000	0	12268000	-1	0	0.05	0	0	1	0	0.98	0	0.95	0	1	0	1	0	1	0	1	0	0	0	0	0	5	0	2	0
Protein TMA108 OS=Saccharomyces cerevisiae (strain ATCC 204508 / S288c) OX=559292 GN=TMA108 PE=1 SV=1	P40462	TMA108	108 kDa		unknown	0	0	0	0	0	0	129350	0	858670	0	1071000	0	649000	0	526630	0	668820	0	0	0.32	0.95	0	0.09	0	1	0	1	0	1	0.06	1	0	1	0	1	0	0	0	1	0	0	0	2	0
Mitochondrial import inner membrane translocase subunit TIM54 OS=Saccharomyces cerevisiae (strain ATCC 204508 / S288c) OX=559292 GN=TIM54 PE=1 SV=1	P47045	TIM54	54 kDa		unknown	242090	0	1045800	0	866590	0	176670	0	1174100	0	1711200	0	1231800	0	1989500	0	2151600	0	1	0	1	0	1	0	1	0.05	1	0	1	0	1	0	1	0	1	0	2	0	6	0	7	0	3	0
Uncharacterized protein YNR040W OS=Saccharomyces cerevisiae (strain ATCC 204508 / S288c) OX=559292 GN=YNR040W PE=1 SV=1	P53736	YNR040W	29 kDa		unknown	781950	0	865910	-1	2457600	0	2118000	0	1777600	0	3443200	0	3027200	0	835200	0	2762500	0	1	0	1	0	1	0	1	0	1	0	1	0	1	0.17	1	0	1	0	5	0	6	0	6	0	5	0
Vacuolar basic amino acid transporter 4 OS=Saccharomyces cerevisiae (strain ATCC 204508 / S288c) OX=559292 GN=VBA4 PE=1 SV=1	Q04602	VBA4	86 kDa		unknown	4469400	0	7673800	0	6556300	0	9700600	0	8894800	0	7882500	0	7282100	0	8967000	0	1662600	-1	1	0	1	0	1	0	1	0	1	0	1	0	1	0.11	1	0.05	1	0	5	0	9	0	5	0	11	0
Phosphatidylglycerol/phosphatidylinositol transfer protein OS=Saccharomyces cerevisiae (strain ATCC 204508 / S288c) OX=559292 GN=NPC2 PE=1 SV=1	Q12408	NPC2	19 kDa		unknown	64928000	0	59785000	-1	7836800	-1	12588000	-1	1075400	-1	4908900	-1	7622700	-1	11190000	-1	3529100	-1	1	0	1	0	1	0	1	0	1	0	1	0	1	0	1	0	0.96	0	18	0	12	0	3	0	6	0
mRNA-decapping enzyme subunit 1 OS=Saccharomyces cerevisiae (strain ATCC 204508 / S288c) OX=559292 GN=DCP1 PE=1 SV=1	Q12517	DCP1	26 kDa		unknown	4008200	-1	3469300	0	516860	0	4919800	-1	4651100	0	6322700	0	6047900	0	10848000	-1	6249900	0	1	0	1	0	1	0	1	0	1	0	1	0	1	0	1	0	1	0	6	0	6	0	5	0	7	0
Ribosomal protein VAR1, mitochondrial OS=Saccharomyces cerevisiae (strain ATCC 204508 / S288c) OX=559292 GN=VAR1 PE=1 SV=3	P02381	VAR1	47 kDa		unknown	734160	0	411950	0	5768000	0	3389800	0	1275000	0	3912400	0	1599800	0	520010	0	2187800	0	1	0	1	0	1	0	1	0.49	1	0	1	0	1	0	1	0	1	0	3	0	4	0	9	0	5	0
Mitochondrial inner membrane i-AAA protease supercomplex subunit YME1 OS=Saccharomyces cerevisiae (strain ATCC 204508 / S288c) OX=559292 GN=YME1 PE=1 SV=1	P32795	YME1	82 kDa		unknown	232140	0	0	0	159670	0	1933600	0	1721800	0	2024800	0	830860	0	370940	0	208440	0	1	0	0.96	0	0.96	0	1	0	1	0	1	0	1	0	1	0	1	0	5	0	1	0	1	0	11	0
Coatomer subunit zeta OS=Saccharomyces cerevisiae (strain ATCC 204508 / S288c) OX=559292 GN=RET3 PE=1 SV=1	P53600	RET3	22 kDa		unknown	6702300	-1	6014400	0	10630000	0	13920000	-1	13784000	0	13849000	-1	7406900	0	18773000	-1	21548000	-1	0.99	0	1	0	1	0	1	0	1	0	1	0	1	0	1	0	1	0	3	0	4	0	6	0	8	0
Uncharacterized protein YLR287C OS=Saccharomyces cerevisiae (strain ATCC 204508 / S288c) OX=559292 GN=YLR287C PE=1 SV=1	Q05881	YLR287C	41 kDa		unknown	1020700	0	867910	0	626930	0	1517200	0	0	-1	815450	-1	2335000	-1	2586600	0	435260	0	1	0.16	1	0	1	0	1	0	0	0	1	0	1	0	1	0	0.99	0	10	0	6	0	3	0	8	0
Sphingoid long chain base kinase 5 OS=Saccharomyces cerevisiae (strain ATCC 204508 / S288c) OX=559292 GN=LCB5 PE=1 SV=1	Q06147	LCB5	78 kDa		unknown	181860	0	325360	0	290800	0	316720	0	1013800	0	834470	0	954050	0	1817700	0	1233900	0	1	0	1	0	1	0	1	0	1	0	1	0	1	0	1	0	1	0	3	0	4	0	3	0	4	0
tRNA (guanine-N(7)-)-methyltransferase OS=Saccharomyces cerevisiae (strain ATCC 204508 / S288c) OX=559292 GN=TRM8 PE=1 SV=1	Q12009	TRM8	33 kDa		unknown	4945700	0	5014900	0	2033000	0	4566700	0	3592100	0	3613700	0	1345900	0	561420	0	3979600	0	1	0	1	0	1	0	1	0	1	0	1	0	1	0	1	0	1	0	11	0	9	0	6	0	10	0
ATP phosphoribosyltransferase OS=Saccharomyces cerevisiae (strain ATCC 204508 / S288c) OX=559292 GN=HIS1 PE=1 SV=1	P00498	HIS1	32 kDa		unknown	860010	0	601820	-1	20535000	0	18528000	0	18242000	0	12676000	0	2304100	0	3242300	-1	828370	0	1	0	0.96	0	1	0	1	0	1	0	0.97	0	1	0	1	0	1	0	5	0	3	0	8	0	9	0
Rotenone-insensitive NADH-ubiquinone oxidoreductase, mitochondrial OS=Saccharomyces cerevisiae (strain ATCC 204508 / S288c) OX=559292 GN=NDI1 PE=1 SV=1	P32340	NDI1	57 kDa		unknown	257590	0	433760	0	639400	0	413280	-1	6395500	0	1801700	0	824020	0	0	0	517580	0	0.96	0.09	1	0	1	0	1	0	1	0	1	0	1	0	0	0	1	0	3	0	4	0	4	0	2	0
U3 small nucleolar RNA-associated protein 11 OS=Saccharomyces cerevisiae (strain ATCC 204508 / S288c) OX=559292 GN=UTP11 PE=1 SV=2	P34247	UTP11	30 kDa		unknown	3131800	0	3242400	0	6088200	-1	1423000	0	0	0	5974100	0	4765100	0	4094000	0	2777500	0	1	0	1	0	1	0	1	0	0.95	0	1	0	1	0	1	0	1	0.06	7	0	9	0	8	0	4	0
Glutathione reductase OS=Saccharomyces cerevisiae (strain ATCC 204508 / S288c) OX=559292 GN=GLR1 PE=1 SV=2	P41921	GLR1	53 kDa		unknown	226620	0	998330	0	0	38369000	781390	57150000	1828500	0	823570	0	924290	0	769140	0	896090	0	1	0.73	1	0.32	0.96	0.59	0.97	0.57	1	0	1	0	1	0	1	0	1	0	4	1	7	0	2	1	2	1
Stress response protein NST1 OS=Saccharomyces cerevisiae (strain ATCC 204508 / S288c) OX=559292 GN=NST1 PE=1 SV=1	P53935	NST1	142 kDa		unknown	366070	0	664490	0	482040	0	1268500	0	813460	-1	1708700	0	757680	0	651470	0	869300	0	1	0.38	1	0.2	1	0	1	0	1	0	1	0	1	0	0.88	0.21	1	0.12	4	0	5	0	3	0	6	0
Chromatin structure-remodeling complex subunit RSC4 OS=Saccharomyces cerevisiae (strain ATCC 204508 / S288c) OX=559292 GN=RSC4 PE=1 SV=2	Q02206	RSC4	72 kDa		unknown	784340	0	1012200	0	0	0	129400	0	2556400	0	1276100	0	403590	0	2043700	-1	642270	0	1	0	1	0	0.81	0	1	0	1	0	1	0	1	0	1	0	1	0	7	0	9	0	1	0	1	0
Transcription initiation factor TFIID subunit 12 OS=Saccharomyces cerevisiae (strain ATCC 204508 / S288c) OX=559292 GN=TAF12 PE=1 SV=1	Q03761	TAF12	61 kDa		unknown	555760	0	828230	0	894750	0	337290	0	948400	0	1384600	0	1057000	0	0	0	1438300	0	1	0	1	0	1	0	1	0	1	0	1	0	1	0	0.99	0	1	0	7	0	6	0	5	0	3	0
tRNA wybutosine-synthesizing protein 2 OS=Saccharomyces cerevisiae (strain ATCC 204508 / S288c) OX=559292 GN=TRM12 PE=1 SV=1	Q04235	TRM12	53 kDa		unknown	1588300	-1	1931900	0	1113100	0	1154600	0	0	0	2242800	-1	1092800	0	1046300	0	1449900	0	1	0	1	0	1	0	1	0	0.96	0	1	0	1	0	1	0	1	0	7	0	7	0	4	0	6	0
Chitin synthase regulator SKT5 OS=Saccharomyces cerevisiae (strain ATCC 204508 / S288c) OX=559292 GN=SKT5 PE=1 SV=1	P34226	SKT5	77 kDa		unknown	498430	0	91009	0	721970	0	1591000	0	666690	0	2490100	0	1840100	0	1308800	0	1959700	0	1	0	1	0	1	0	1	0	1	0	1	0	1	0	1	0	1	0	3	0	3	0	4	0	6	0
Transcription factor MBP1 OS=Saccharomyces cerevisiae (strain ATCC 204508 / S288c) OX=559292 GN=MBP1 PE=1 SV=1	P39678	MBP1	94 kDa		unknown	0	0	952450	0	147490	0	604340	19361000	1014500	11793000	857890	0	476030	0	433050	0	485480	6727700	0.62	0	1	0	1	0	1	0.68	1	0.69	1	0.22	1	0.09	1	0.09	1	0.98	0	0	4	0	2	0	6	1
Alcohol dehydrogenase 5 OS=Saccharomyces cerevisiae (strain ATCC 204508 / S288c) OX=559292 GN=ADH5 PE=1 SV=1	P38113	ADH5	38 kDa	TRUE	unknown	0	190960000	0	0	0	0	0	22306000	60666000	0	0	0	0	50828000	71787000	0	0	27450000	0	0.1	0	0	0	0	0	0.99	0.99	0	0	0	0	0.58	0.37	0	0	0.05	0	3	0	0	0	0	0	4
Heat shock protein STI1 OS=Saccharomyces cerevisiae (strain ATCC 204508 / S288c) OX=559292 GN=STI1 PE=1 SV=1	P15705	STI1	66 kDa		unknown	79310	0	39625	0	75101	0	307820	0	1340100	0	677120	0	879610	0	1085900	0	558980	0	1	0	1	0	0.96	0.09	1	0	1	0	1	0	1	0	1	0.32	1	0	5	0	2	0	1	0	3	0
Uracil phosphoribosyltransferase OS=Saccharomyces cerevisiae (strain ATCC 204508 / S288c) OX=559292 GN=FUR1 PE=1 SV=2	P18562	FUR1	25 kDa		unknown	1700800	-1	669810	-1	613800	-1	3144900	-1	1776400	-1	6143400	-1	6805900	-1	4164700	0	2846400	-1	1	0	1	0	1	0	1	0	1	0	1	0	1	0	1	0	1	0	6	0	5	0	3	0	4	0
Zinc/cadmium resistance protein OS=Saccharomyces cerevisiae (strain ATCC 204508 / S288c) OX=559292 GN=ZRC1 PE=1 SV=2	P20107	ZRC1	48 kDa		unknown	3907500	-1	4260000	-1	5009900	-1	14107000	-1	10015000	0	14173000	-1	10410000	-1	2933200	-1	13456000	-1	0.96	0	1	0	0.96	0	1	0	1	0	1	0	1	0	1	0	1	0	3	0	4	0	3	0	4	0
DNA-directed RNA polymerase III subunit RPC4 OS=Saccharomyces cerevisiae (strain ATCC 204508 / S288c) OX=559292 GN=RPC53 PE=1 SV=2	P25441	RPC53	47 kDa		unknown	375460	0	1165100	0	2837300	0	4514600	0	5619100	0	2714500	0	1607900	0	1965700	0	1924100	0	0.99	0.74	1	0	1	0	1	0	1	0	1	0	1	0	1	0	1	0	2	0	8	0	7	0	5	0
Vacuolar membrane protein PEP3 OS=Saccharomyces cerevisiae (strain ATCC 204508 / S288c) OX=559292 GN=PEP3 PE=1 SV=1	P27801	PEP3	107 kDa		unknown	0	0	0	0	0	0	178640	0	442940	0	1038000	0	246200	5205600	562030	0	538130	0	0.16	0	0.96	0	0.96	0	1	0	1	0	1	0.1	1	0.99	1	0.15	1	0.49	0	0	1	0	1	0	2	0
Mannan polymerase II complex ANP1 subunit OS=Saccharomyces cerevisiae (strain ATCC 204508 / S288c) OX=559292 GN=ANP1 PE=1 SV=3	P32629	ANP1	58 kDa		unknown	0	-1	1376700	-1	-1	0	35635000	-1	3595900	0	1787300	-1	3037800	0	5589300	0	833040	0	0	0	1	0	0	0	1	0	1	0	1	0	1	0	1	0	1	0	0	0	6	0	0	0	20	0
Transcriptional regulatory protein GAT1 OS=Saccharomyces cerevisiae (strain ATCC 204508 / S288c) OX=559292 GN=GAT1 PE=1 SV=1	P43574	GAT1	56 kDa		unknown	895050	0	963410	0	1305200	0	2223800	0	420850	0	2099700	0	1328900	-1	4555500	0	1071500	0	0.96	0	1	0	1	0	1	0	0.95	0	1	0	1	0	1	0	1	0	5	0	5	0	6	0	8	0
ATP-dependent RNA helicase DOB1 OS=Saccharomyces cerevisiae (strain ATCC 204508 / S288c) OX=559292 GN=MTR4 PE=1 SV=1	P47047	MTR4	122 kDa		unknown	48502	0	287110	0	104800	0	268910	0	1210600	0	1820500	0	588040	0	269380	0	242040	0	0.96	0	1	0	0.99	0	1	0	1	0	1	0	1	0	1	0	1	0	1	0	6	0	2	0	4	0
Histone H1 OS=Saccharomyces cerevisiae (strain ATCC 204508 / S288c) OX=559292 GN=HHO1 PE=1 SV=1	P53551	HHO1	28 kDa		unknown	9656000	0	17230000	0	3349500	0	2547900	0	2933800	0	379370	0	5994200	0	2743000	0	1319600	0	1	0	1	0	1	0.05	1	0	1	0.09	0.96	0	1	0	1	0	1	0	10	0	14	0	5	0	5	0
N-acyl-phosphatidylethanolamine-hydrolyzing phospholipase D, mitochondrial OS=Saccharomyces cerevisiae (strain ATCC 204508 / S288c) OX=559292 GN=FMP30 PE=1 SV=1	Q02883	FMP30	54 kDa		unknown	547200	0	1341700	0	514990	-1	994990	-1	971090	-1	1475200	-1	1034700	0	2066000	0	1679600	0	1	0	1	0	1	0	1	0	1	0	1	0	1	0	1	0	1	0	4	0	7	0	4	0	7	0
Silent chromatin protein ESC1 OS=Saccharomyces cerevisiae (strain ATCC 204508 / S288c) OX=559292 GN=ESC1 PE=1 SV=1	Q03661	ESC1	187 kDa		unknown	277390	0	283640	0	152370	0	290780	-1	328310	0	377850	0	126070	0	554690	0	728070	0	1	0	1	0	0.96	0	1	0	1	0	1	0	1	0	1	0	1	0	8	0	4	0	2	0	5	0
Protein OS-9 homolog OS=Saccharomyces cerevisiae (strain ATCC 204508 / S288c) OX=559292 GN=YOS9 PE=1 SV=1	Q99220	YOS9	61 kDa		unknown	1038900	0	1188000	-1	420780	0	1583300	0	1891600	-1	1409500	0	1931200	0	1249500	-1	3635700	0	1	0	1	0	1	0	1	0	1	0	1	0	1	0	1	0	1	0.16	6	0	5	0	3	0	5	0
ATP synthase subunit 5, mitochondrial OS=Saccharomyces cerevisiae (strain ATCC 204508 / S288c) OX=559292 GN=ATP5 PE=1 SV=1	P09457	ATP5	23 kDa		unknown	1486000	0	1582300	0	3661400	0	9934500	0	0	0	252650	0	5419100	0	2858500	0	3281600	0	1	0.44	1	0	1	0.1	1	0	0	0	0.96	0	1	0	1	0	1	0	5	0	4	0	10	0	10	0
General amino-acid permease GAP1 OS=Saccharomyces cerevisiae (strain ATCC 204508 / S288c) OX=559292 GN=GAP1 PE=1 SV=2	P19145	GAP1	66 kDa		unknown	5280200	0	5855200	0	1844100	0	586180	-1	236290	0	2675300	0	2400200	0	2781700	0	729070	0	1	0	1	0	1	0	1	0	1	0	1	0	1	0	1	0.1	1	0	10	0	11	0	4	0	3	0
54S ribosomal protein L15, mitochondrial OS=Saccharomyces cerevisiae (strain ATCC 204508 / S288c) OX=559292 GN=MRPL15 PE=1 SV=3	P36523	MRPL15	28 kDa		unknown	9029700	0	4045200	0	6415700	-1	8233600	-1	6653800	0	5020100	0	8732200	-1	3900100	-1	4526600	0	1	0	1	0	1	0	1	0	1	0	1	0	1	0	1	0	1	0	12	0	5	0	7	0	6	0
Nucleoporin GLE2 OS=Saccharomyces cerevisiae (strain ATCC 204508 / S288c) OX=559292 GN=GLE2 PE=1 SV=1	P40066	GLE2	41 kDa		unknown	1348900	0	662450	0	0	0	2765800	0	407450	0	1177400	0	4813700	-1	1660200	0	780510	-1	1	0	0.99	0	1	0.09	1	0	1	0	1	0	1	0	1	0	1	0	8	0	3	0	5	0	9	0
Actin-related protein 2/3 complex subunit 2 OS=Saccharomyces cerevisiae (strain ATCC 204508 / S288c) OX=559292 GN=ARC35 PE=1 SV=1	P53731	ARC35	40 kDa		unknown	0	0	368300	0	0	0	737590	0	7010300	0	12883000	-1	2970400	0	2530000	-1	536560	0	1	0	0.88	0	0.99	0	1	0	1	0	1	0	1	0	0.97	0	1	0	3	0	1	0	1	0	4	0
13 kDa ribonucleoprotein-associated protein OS=Saccharomyces cerevisiae (strain ATCC 204508 / S288c) OX=559292 GN=SNU13 PE=1 SV=1	P39990	SNU13	14 kDa		unknown	38116000	0	40982000	0	20935000	0	29272000	0	5124600	0	15636000	0	17511000	0	24355000	0	28830000	-1	1	0	1	0	1	0	1	0	1	0	1	0	1	0	1	0	1	0	10	0	10	0	5	0	5	0
Cluster of GTP-binding nuclear protein GSP1/CNR1 OS=Saccharomyces cerevisiae (strain ATCC 204508 / S288c) OX=559292 GN=GSP1 PE=1 SV=1 (P32835)	P32835 [2]	GSP1	25 kDa	TRUE	unknown	0	0	2391900	0	5841600	0	18659000	0	21944000	-1	7794800	-1	3029500	-1	14899000	-1	4170500	0	1	0.99	1	0	1	0	1	0	1	0	1	0	1	0	1	0	1	0	5	1	3	0	6	0	9	0
Sorting assembly machinery 35 kDa subunit OS=Saccharomyces cerevisiae (strain ATCC 204508 / S288c) OX=559292 GN=SAM35 PE=1 SV=2	P14693	SAM35	37 kDa		unknown	1717000	0	1216500	0	579940	0	498700	0	6732800	-1	6469900	0	5319900	0	11651000	0	2167200	0	1	0	1	0	0.96	0	1	0.09	1	0	1	0	1	0	1	0	1	0	5	0	5	0	3	0	1	0
Transaldolase OS=Saccharomyces cerevisiae (strain ATCC 204508 / S288c) OX=559292 GN=TAL1 PE=1 SV=4	P15019	TAL1	37 kDa		unknown	1629100	0	2267800	0	2913400	0	2518600	0	2241600	0	2477800	0	2314000	0	3097400	0	5418900	0	1	0.27	1	0	1	0	1	0.05	1	0	1	0.06	1	0	0.51	0	1	0.09	6	0	9	0	6	0	6	0
DNA-directed RNA polymerases I, II, and III subunit RPABC1 OS=Saccharomyces cerevisiae (strain ATCC 204508 / S288c) OX=559292 GN=RPB5 PE=1 SV=1	P20434	RPB5	25 kDa		unknown	5227800	0	4608800	0	3794500	-1	3133800	0	14537000	0	6941200	0	3562000	0	5832100	0	3221200	0	1	0	1	0	1	0	1	0	1	0	1	0	1	0	1	0	1	0	9	0	6	0	5	0	4	0
Ribosome assembly protein 4 OS=Saccharomyces cerevisiae (strain ATCC 204508 / S288c) OX=559292 GN=RSA4 PE=1 SV=3	P25382	RSA4	57 kDa		unknown	715220	582840000	1807900	0	2050800	0	103100	0	1615500	0	4309000	0	2282600	0	244860	0	1993600	0	1	0.97	1	0	1	0	1	0	1	0	1	0	1	0	0.96	0	1	0	5	3	5	0	4	0	2	0
C-8 sterol isomerase OS=Saccharomyces cerevisiae (strain ATCC 204508 / S288c) OX=559292 GN=ERG2 PE=1 SV=1	P32352	ERG2	25 kDa		unknown	22240000	0	10357000	-1	13165000	-1	31635000	0	4374400	0	32415000	-1	26958000	-1	28062000	-1	33619000	-1	1	0	1	0	1	0	1	0	0.95	0	1	0	1	0	1	0	1	0	6	0	4	0	8	0	7	0
Single-stranded DNA-binding protein RIM1, mitochondrial OS=Saccharomyces cerevisiae (strain ATCC 204508 / S288c) OX=559292 GN=RIM1 PE=1 SV=1	P32445	RIM1	15 kDa		unknown	9361200	0	17455000	0	34253000	0	17633000	-1	7250800	-1	10022000	0	4168000	-1	1135500	0	1846500	0	1	0	1	0	1	0	1	0	1	0	1	0	1	0	1	0	1	0	7	0	9	0	11	0	5	0
PAB1-binding protein 2 OS=Saccharomyces cerevisiae (strain ATCC 204508 / S288c) OX=559292 GN=PBP2 PE=1 SV=1	P38151	PBP2	46 kDa		unknown	565460	0	726840	0	2476300	0	1936200	0	3131000	-1	1818100	0	3593400	0	778360	0	6003500	0	1	0	1	0	1	0	1	0	1	0	1	0	1	0	1	0	1	0	4	0	5	0	2	0	6	0
E3 ubiquitin-protein ligase DMA1 OS=Saccharomyces cerevisiae (strain ATCC 204508 / S288c) OX=559292 GN=DMA1 PE=1 SV=1	P38823	DMA1	46 kDa	TRUE	unknown	2909500	0	1967700	0	2200400	0	623060	0	458040	0	2740200	0	2091700	0	3609100	0	2665100	-1	1	0	1	0	1	0	1	0	1	0	1	0	1	0	1	0	1	0	8	0	6	0	5	0	4	0
Protein CCC1 OS=Saccharomyces cerevisiae (strain ATCC 204508 / S288c) OX=559292 GN=CCC1 PE=1 SV=1	P47818	CCC1	34 kDa		unknown	2844600	0	3376100	0	5084700	0	6136300	0	6016100	0	4077800	0	4594000	0	5063300	-1	4162600	0	1	0	1	0	1	0	1	0	1	0	1	0	1	0	1	0	1	0	5	0	5	0	6	0	8	0
Mitochondrial group I intron splicing factor CCM1 OS=Saccharomyces cerevisiae (strain ATCC 204508 / S288c) OX=559292 GN=CCM1 PE=1 SV=1	P48237	CCM1	101 kDa		unknown	46881	0	226470	14993000	400530	0	570470	0	934350	4670200	689710	0	477890	0	1060100	0	357590	0	0.92	0	1	0.56	1	0	1	0	1	0.33	1	0	1	0	1	0	1	0	1	0	3	1	5	0	6	0
Probable E3 ubiquitin-protein ligase HUL5 OS=Saccharomyces cerevisiae (strain ATCC 204508 / S288c) OX=559292 GN=HUL5 PE=1 SV=1	P53119	HUL5	106 kDa		unknown	356890	0	321240	0	0	0	341120	0	381160	0	861070	0	664250	0	1569500	0	604890	0	0.96	0	1	0	0.37	0	0.68	0	1	0	1	0	1	0	1	0.18	1	0	3	0	3	0	1	0	3	0
Peptidyl-prolyl cis-trans isomerase CPR6 OS=Saccharomyces cerevisiae (strain ATCC 204508 / S288c) OX=559292 GN=CPR6 PE=1 SV=1	P53691	CPR6	42 kDa		unknown	2784900	0	2043900	0	3155600	-1	3158900	0	3903900	-1	4109100	0	2268200	0	2635500	0	9107300	-1	1	0	1	0	1	0	1	0	1	0	1	0	1	0	0.97	0	1	0	7	0	6	0	5	0	5	0
AP-1 complex subunit gamma-1 OS=Saccharomyces cerevisiae (strain ATCC 204508 / S288c) OX=559292 GN=APL4 PE=1 SV=1	Q12028	APL4	94 kDa		unknown	18915	0	220950	0	0	0	138260	0	2001800	0	857160	0	221340	0	487370	0	104200	0	0.96	0	1	0	0.77	0	1	0	1	0	1	0	1	0	1	0	1	0	3	0	3	0	0	0	2	0
25S rRNA (uridine(2843)-N(3))-methyltransferase OS=Saccharomyces cerevisiae (strain ATCC 204508 / S288c) OX=559292 GN=BMT6 PE=1 SV=1	Q12291	BMT6	42 kDa		unknown	211090	0	442520	1378200000	356590	0	790640	0	1201400	0	3624200	0	3103800	0	7235300	0	809890	11253000	1	0	0.96	0.54	0.94	0	1	0.35	1	0.18	1	0.25	1	0	1	0	1	0.75	2	0	2	1	1	0	2	0
Nucleoporin NUP53 OS=Saccharomyces cerevisiae (strain ATCC 204508 / S288c) OX=559292 GN=NUP53 PE=1 SV=1	Q03790	NUP53	53 kDa		unknown	673030	0	2293800	0	39135000	0	6978600	0	1366500	0	845110	0	2934800	0	2579700	0	2610900	0	1	0.27	1	0	1	0.11	1	0.47	0.39	0.08	1	0	1	0	1	0.15	1	0.34	3	0	5	0	7	0	8	0
E3 ubiquitin-protein ligase UBR1 OS=Saccharomyces cerevisiae (strain ATCC 204508 / S288c) OX=559292 GN=UBR1 PE=1 SV=1	P19812	UBR1	225 kDa		unknown	27800	0	0	0	43637	0	241470	0	27889	0	291220	0	121920	0	705760	0	244750	0	0.96	0.07	0	0	1	0	1	0	1	0	1	0.16	1	0.68	1	0	1	0	1	0	0	0	3	0	4	0
Pre-mRNA-splicing factor 8 OS=Saccharomyces cerevisiae (strain ATCC 204508 / S288c) OX=559292 GN=PRP8 PE=1 SV=1	P33334	PRP8	280 kDa		unknown	144630	0	269760	0	280940	0	190230	0	589080	0	200330	0	70324	0	575980	0	93611	0	0.96	0	1	0	1	0	1	0.24	1	0	1	0	1	0.16	1	0	1	0	3	0	4	0	5	0	2	0
Cell morphogenesis protein PAG1 OS=Saccharomyces cerevisiae (strain ATCC 204508 / S288c) OX=559292 GN=TAO3 PE=1 SV=1	P40468	TAO3	270 kDa		unknown	339580	0	241780	0	123410	0	0	0	121260	0	176870	0	77830	0	192420	0	163100	0	1	0.54	0.96	0	1	0.37	0.86	0.95	1	0	1	0.63	1	0	1	0	1	0.48	4	0	3	0	4	0	0	1
Membrane-bound O-acyltransferase GUP1 OS=Saccharomyces cerevisiae (strain ATCC 204508 / S288c) OX=559292 GN=GUP1 PE=1 SV=1	P53154	GUP1	65 kDa		unknown	2416800	0	1919900	0	2747700	0	2898600	0	1235000	0	1814800	0	707920	0	653860	0	1697800	0	1	0.06	1	0	1	0	1	0	1	0	1	0	1	0	1	0	1	0	10	0	7	0	9	0	7	0
GTPase-activating protein GYP5 OS=Saccharomyces cerevisiae (strain ATCC 204508 / S288c) OX=559292 GN=GYP5 PE=1 SV=1	Q12344	GYP5	102 kDa		unknown	0	0	214010	0	0	0	789850	0	1147800	0	567340	0	431700	0	1582700	-1	214960	0	0.99	0.06	1	0	0.21	0	1	0	1	0	1	0	1	0	1	0	1	0	1	0	3	0	0	0	4	0
Transcriptional modulator WTM1 OS=Saccharomyces cerevisiae (strain ATCC 204508 / S288c) OX=559292 GN=WTM1 PE=1 SV=1	Q12363	WTM1	48 kDa		unknown	0	0	0	0	0	0	3590800	0	2449500	0	1157500	0	2270400	0	2314000	0	1888200	0	0.93	0	0	0	0.81	0.1	1	0	1	0	1	0.09	1	0	1	0	1	0.06	2	0	0	0	1	0	12	0
Protein CBP3, mitochondrial OS=Saccharomyces cerevisiae (strain ATCC 204508 / S288c) OX=559292 GN=CBP3 PE=1 SV=1	P21560	CBP3	39 kDa		unknown	1023500	0	1297800	0	3131700	0	1126400	0	2026200	0	1513800	0	1031600	0	0	0	1210900	0	1	0.29	1	0.08	1	0.06	1	0.83	1	0	1	0	1	0	1	0	1	0	5	0	5	0	6	0	4	1
Cluster of Protein ORM1 OS=Saccharomyces cerevisiae (strain ATCC 204508 / S288c) OX=559292 GN=ORM1 PE=1 SV=1 (P53224)	P53224 [2]	ORM1	25 kDa	TRUE	unknown	8431300	0	7579800	-1	11106000	-1	6187300	-1	11916000	-1	2301600	-1	1675500	0	1742100	0	3021800	-1	1	0	1	0	1	0	1	0	1	0	1	0	1	0	1	0	1	0	8	0	8	0	9	0	7	0
Cluster of Lysine-specific permease OS=Saccharomyces cerevisiae (strain ATCC 204508 / S288c) OX=559292 GN=LYP1 PE=1 SV=2 (P32487)	P32487 [2]	LYP1	68 kDa	TRUE	unknown	1398600	0	2308500	-1	339640	-1	0	0	3038600	0	6101200	0	583780	-1	4240200	-1	896830	-1	1	0	1	0	1	0	1	0	1	0	1	0	1	0	1	0	1	0	5	0	5	0	4	0	4	0
Heat shock protein 26 OS=Saccharomyces cerevisiae (strain ATCC 204508 / S288c) OX=559292 GN=HSP26 PE=1 SV=3	P15992	HSP26	24 kDa		unknown	0	0	993640	-1	7908300	-1	24134000	-1	13986000	-1	872330	0	5483300	0	3266700	0	4633900	0	0	0	0.99	0	1	0	1	0	1	0	1	0.09	1	0	0.97	0.08	1	0.05	0	0	4	0	4	0	14	0
Mitogen-activated protein kinase FUS3 OS=Saccharomyces cerevisiae (strain ATCC 204508 / S288c) OX=559292 GN=FUS3 PE=1 SV=2	P16892	FUS3	41 kDa	TRUE	unknown	2790700	0	821440	0	1079100	0	945320	-1	1356000	0	3406800	0	3126400	-1	4180300	0	1954500	-1	1	0	0.88	0	1	0	1	0	1	0	1	0	1	0	1	0	1	0	3	0	2	0	3	0	3	0
SEC14 cytosolic factor OS=Saccharomyces cerevisiae (strain ATCC 204508 / S288c) OX=559292 GN=SEC14 PE=1 SV=3	P24280	SEC14	35 kDa	TRUE	unknown	361140	0	0	0	458920	0	2011100	0	1611900	-1	442560	0	2904500	-1	2111900	0	968300	0	1	0	1	0	1	0	1	0.24	1	0	1	0	1	0	1	0	1	0	5	0	4	0	3	0	5	0
54S ribosomal protein RML2, mitochondrial OS=Saccharomyces cerevisiae (strain ATCC 204508 / S288c) OX=559292 GN=RML2 PE=1 SV=1	P32611	RML2	44 kDa		unknown	1280400	0	1091900	0	3144900	0	1932600	0	3445100	0	2975600	0	3027900	0	0	0	3712200	0	1	0	1	0	1	0.07	1	0	1	0	1	0	1	0	0.88	0	1	0	3	0	5	0	5	0	6	0
E3 ubiquitin-protein ligase RSP5 OS=Saccharomyces cerevisiae (strain ATCC 204508 / S288c) OX=559292 GN=RSP5 PE=1 SV=1	P39940	RSP5	92 kDa		unknown	107190	0	76331	0	299220	-1	720040	0	394050	0	620910	0	771380	0	455450	0	408850	0	1	0	1	0	0.96	0	1	0	1	0	1	0	1	0	1	0	1	0	4	0	2	0	2	0	6	0
DNA damage-inducible protein 1 OS=Saccharomyces cerevisiae (strain ATCC 204508 / S288c) OX=559292 GN=DDI1 PE=1 SV=1	P40087	DDI1	47 kDa		unknown	0	0	2980100	-1	0	0	31596000	0	1651600	0	65282	0	0	0	1871300	-1	0	0	0	0	1	0	0.05	0	1	0	1	0	0.98	0	0.87	0	1	0	0.97	0.06	0	0	9	0	0	0	25	0
1,2-dihydroxy-3-keto-5-methylthiopentene dioxygenase OS=Saccharomyces cerevisiae (strain ATCC 204508 / S288c) OX=559292 GN=ADI1 PE=1 SV=1	Q03677	ADI1	21 kDa		unknown	2226700	0	3270300	-1	8272000	-1	6710300	-1	2815600	-1	5478000	0	3283800	-1	10375000	-1	5292000	0	0.99	0	1	0	1	0	1	0	1	0	1	0	1	0	1	0	1	0	3	0	7	0	9	0	10	0
Nucleoporin ASM4 OS=Saccharomyces cerevisiae (strain ATCC 204508 / S288c) OX=559292 GN=ASM4 PE=1 SV=1	Q05166	ASM4	59 kDa		unknown	0	0	0	0	322030	-1	3188100	0	1243100	0	1308100	0	2100500	0	2498800	0	294160	111770000	0	0	0.96	0	1	0	1	0	1	0	1	0	1	0	1	0	1	0.54	0	0	2	0	5	0	9	0
MICOS complex subunit MIC10 OS=Saccharomyces cerevisiae (strain ATCC 204508 / S288c) OX=559292 GN=MIC10 PE=1 SV=1	Q96VH5	MIC10	10 kDa		unknown	19529000	0	1608700	0	2102400	0	23260000	0	32785000	0	13579000	0	21470000	-1	25458000	0	28212000	0	1	0	1	0	1	0	1	0	1	0.14	1	0	1	0	0.97	0	1	0	5	0	3	0	4	0	6	0
Leu/Val/Ile amino-acid permease OS=Saccharomyces cerevisiae (strain ATCC 204508 / S288c) OX=559292 GN=BAP2 PE=1 SV=2	P38084	BAP2	68 kDa	TRUE	unknown	102960	0	166760	0	712520	0	2250800	0	968720	0	2680800	0	737330	0	698170	0	1503400	0	0.96	0.14	0.95	0	1	0	1	0	1	0	1	0.07	1	0	0.99	0	1	0	2	0	2	0	7	0	9	0
DNA ligase 1 OS=Saccharomyces cerevisiae (strain ATCC 204508 / S288c) OX=559292 GN=CDC9 PE=1 SV=2	P04819	CDC9	85 kDa		unknown	330570	0	340520	0	783520	0	210950	0	288490	0	1098500	0	381080	0	1105600	0	814900	0	1	0.05	1	0	1	0	1	0	1	0	1	0	1	0	1	0	1	0	9	0	4	0	4	0	5	0
DNA-directed RNA polymerase, mitochondrial OS=Saccharomyces cerevisiae (strain ATCC 204508 / S288c) OX=559292 GN=RPO41 PE=1 SV=2	P13433	RPO41	153 kDa		unknown	37796	0	24494	0	0	0	221760	0	1030600	0	629920	0	516000	0	671090	0	71697	0	0.94	0.36	0.95	0	0.74	0.13	1	0	1	0	1	0	1	0	1	0	0.96	0	1	0	1	0	0	0	5	0
54S ribosomal protein L33, mitochondrial OS=Saccharomyces cerevisiae (strain ATCC 204508 / S288c) OX=559292 GN=MRPL33 PE=1 SV=4	P20084	MRPL33	10 kDa		unknown	6726200	0	7605300	0	16259000	0	15934000	0	645810000	0	11806000	0	11194000	0	7635100	0	14199000	0	0.99	0	0.99	0	1	0	1	0	1	0	1	0	1	0	1	0	1	0	3	0	3	0	7	0	5	0
Chitin synthase 3 OS=Saccharomyces cerevisiae (strain ATCC 204508 / S288c) OX=559292 GN=CHS3 PE=1 SV=3	P29465	CHS3	132 kDa		unknown	395340	0	455240	0	520510	0	556090	0	121300	0	1009800	0	726750	-1	727260	0	644770	0	1	0	1	0	1	0	1	0	0.95	0	1	0	1	0	1	0.06	1	0.17	5	0	5	0	7	0	6	0
Mitochondrial Rho GTPase 1 OS=Saccharomyces cerevisiae (strain ATCC 204508 / S288c) OX=559292 GN=GEM1 PE=1 SV=1	P39722	GEM1	75 kDa		unknown	44837	0	272120	0	1611600	0	1965300	0	818600	0	1252000	0	414270	0	143310	0	332530	0	0.53	0.12	1	0	1	0	1	0	1	0	1	0	1	0	0.97	0	1	0	1	0	3	0	9	0	12	0
Helicase SEN1 OS=Saccharomyces cerevisiae (strain ATCC 204508 / S288c) OX=559292 GN=SEN1 PE=1 SV=2	Q00416	SEN1	253 kDa		unknown	79681	0	286200	0	146330	0	147570	0	197730	0	96273	0	91314	0	316220	0	83550	0	0.99	0.15	1	0	1	0.59	1	0.07	1	0	1	0.09	1	0.08	1	0	1	0.12	3	0	6	0	5	1	5	0
Trafficking protein particle complex subunit 31 OS=Saccharomyces cerevisiae (strain ATCC 204508 / S288c) OX=559292 GN=TRS31 PE=1 SV=1	Q03337	TRS31	32 kDa		unknown	1612500	-1	2453700	-1	2833200	0	3429000	0	1335000	0	1465600	0	1427700	-1	2428800	0	2135400	0	1	0	1	0	1	0	1	0	1	0	1	0	1	0	1	0.21	1	0	9	0	6	0	7	0	6	0
Regulatory protein SWI6 OS=Saccharomyces cerevisiae (strain ATCC 204508 / S288c) OX=559292 GN=SWI6 PE=1 SV=1	P09959	SWI6	91 kDa		unknown	98276	0	214500	0	130220	0	247920	-1	813030	0	930980	0	432250	-1	713140	-1	1027200	0	0.96	0	0.92	0	0.88	0	1	0	1	0	1	0	1	0	1	0	1	0	2	0	2	0	1	0	5	0
Nitrogen permease reactivator protein OS=Saccharomyces cerevisiae (strain ATCC 204508 / S288c) OX=559292 GN=NPR1 PE=1 SV=2	P22211	NPR1	86 kDa		unknown	929190	0	933080	0	260350	0	259710	0	612270	0	557170	0	1021600	0	2309900	0	1014900	0	1	0	1	0	1	0	0.97	0.21	1	0	1	0	1	0	1	0	1	0	9	0	6	0	4	0	2	0
Actin-related protein 2/3 complex subunit 4 OS=Saccharomyces cerevisiae (strain ATCC 204508 / S288c) OX=559292 GN=ARC19 PE=1 SV=2	P33204	ARC19	20 kDa		unknown	1907500	-1	1614200	0	3636600	0	7777300	0	9379100	-1	11979000	-1	3472600	-1	6282100	0	2934900	-1	1	0	1	0	1	0	1	0	1	0	1	0	1	0	1	0	1	0	6	0	4	0	4	0	6	0
Putative zinc metalloproteinase YIL108W OS=Saccharomyces cerevisiae (strain ATCC 204508 / S288c) OX=559292 GN=YIL108W PE=1 SV=1	P40483	YIL108W	77 kDa		unknown	0	0	308690	0	800060	0	1006000	0	1002100	0	740640	0	218300	0	1426400	0	330440	0	0.13	0	0.94	0	1	0.18	1	0	1	0	1	0	1	0	1	0	1	0	0	0	2	0	5	0	6	0
DNA-directed RNA polymerase I subunit RPA43 OS=Saccharomyces cerevisiae (strain ATCC 204508 / S288c) OX=559292 GN=RPA43 PE=1 SV=2	P46669	RPA43	36 kDa		unknown	2636100	0	3234900	-1	2359400	-1	2380500	0	11681000	0	7675500	-1	5127400	0	4844200	-1	4150700	-1	1	0	1	0	1	0	1	0	1	0	1	0	1	0	1	0	1	0	5	0	5	0	3	0	6	0
Adenine phosphoribosyltransferase 1 OS=Saccharomyces cerevisiae (strain ATCC 204508 / S288c) OX=559292 GN=APT1 PE=1 SV=3	P49435	APT1	21 kDa		unknown	3046900	-1	1665000	0	1517800	-1	6567600	-1	8755000	0	5817800	-1	1936200	-1	25274000	0	12458000	0	1	0	1	0	1	0	1	0	1	0	1	0	1	0	1	0	1	0	4	0	4	0	2	0	6	0
Uncharacterized protein YGL117W OS=Saccharomyces cerevisiae (strain ATCC 204508 / S288c) OX=559292 GN=YGL117W PE=1 SV=1	P53133	YGL117W	31 kDa		unknown	1746700	0	2916200	0	604900	0	4097400	0	5525700	-1	6642000	0	3419500	-1	13236000	0	7634100	-1	0.91	0	1	0	0.97	0	1	0	1	0	1	0	1	0	1	0	1	0	3	0	4	0	1	0	6	0
Factor arrest protein 8 OS=Saccharomyces cerevisiae (strain ATCC 204508 / S288c) OX=559292 GN=FAR8 PE=1 SV=1	Q05040	FAR8	59 kDa		unknown	0	-1	0	0	512090	0	398210	0	657810	0	1412100	-1	593280	0	1658400	0	1137400	0	0	0	0	0	1	0	0.97	0	1	0	1	0	1	0	1	0	1	0	0	0	0	0	4	0	3	0
Transcription factor SPN1 OS=Saccharomyces cerevisiae (strain ATCC 204508 / S288c) OX=559292 GN=SPN1 PE=1 SV=1	Q06505	SPN1	46 kDa		unknown	353680	0	833350	0	941260	0	1707600	0	576500	0	1778300	0	699370	0	1122800	0	1281800	0	1	0.19	1	0	1	0	1	0	0.96	0	1	0	1	0	1	0	1	0	4	0	5	0	6	0	5	0
Trafficking protein particle complex subunit 33 OS=Saccharomyces cerevisiae (strain ATCC 204508 / S288c) OX=559292 GN=TRS33 PE=1 SV=1	Q99394	TRS33	31 kDa		unknown	666990	0	1084000	0	2463800	0	1787200	0	1991400	0	2519300	-1	2303600	0	4147200	0	2281200	0	0.96	0	0.96	0	1	0.09	1	0	1	0	1	0	1	0	1	0	1	0	5	0	3	0	5	0	7	0
Uncharacterized mitochondrial membrane protein FMP10 OS=Saccharomyces cerevisiae (strain ATCC 204508 / S288c) OX=559292 GN=FMP10 PE=1 SV=1	P40098	FMP10	28 kDa		unknown	1838600	-1	2253600	0	3228000	0	5089700	0	2768900	0	3114000	-1	3433800	0	1268700	0	2430200	-1	1	0	0.96	0	1	0	1	0	1	0	1	0	1	0	0.97	0	1	0	6	0	5	0	5	0	7	0
Tryptophan--tRNA ligase, cytoplasmic OS=Saccharomyces cerevisiae (strain ATCC 204508 / S288c) OX=559292 GN=WRS1 PE=1 SV=1	Q12109	WRS1	49 kDa		unknown	0	0	237100	0	131960	0	527580	0	269850	0	148790	0	316330	0	291460	0	804470	20360000	0.97	0	1	0	1	0	1	0	1	0	1	0	1	0	1	0.23	1	0.61	3	0	4	0	1	0	3	0
DNA replication regulator DPB11 OS=Saccharomyces cerevisiae (strain ATCC 204508 / S288c) OX=559292 GN=DPB11 PE=1 SV=1	P47027	DPB11	87 kDa		unknown	528660	0	951390	0	2705100	0	2648900	0	4240300	0	2436400	0	6741600	0	4035500	0	3049600	0	0.87	0.96	1	0	1	0.07	0.89	0	0.96	0	0.97	0	1	0.12	0.94	0	1	0.92	4	1	4	0	6	0	7	0
Cluster of Cytochrome c oxidase subunit 1 OS=Saccharomyces cerevisiae (strain ATCC 204508 / S288c) OX=559292 GN=COX1 PE=1 SV=2 (P00401)	P00401 [6]	COX1	59 kDa	TRUE	unknown	0	0	0	0	0	-1	0	-1	0	-1	0	-1	0	-1	0	0	0	0	0.96	0.85	1	0.22	1	0.06	1	0	0.96	0.19	0.99	0.19	1	0	1	0.87	1	0.11	1	0	3	0	4	0	10	0
Adenylyl cyclase-associated protein OS=Saccharomyces cerevisiae (strain ATCC 204508 / S288c) OX=559292 GN=SRV2 PE=1 SV=1	P17555	SRV2	58 kDa		unknown	334600	0	798610	0	1333000	0	1892500	0	761940	0	429740	0	739300	0	314880	0	1569400	0	1	0	1	0	1	0	1	0	1	0	1	0	1	0.09	0.99	0	1	0	5	0	4	0	6	0	8	0
Proteasome subunit beta type-6 OS=Saccharomyces cerevisiae (strain ATCC 204508 / S288c) OX=559292 GN=PRE7 PE=1 SV=1	P23724	PRE7	27 kDa		unknown	3825000	0	3720600	-1	1496300	-1	0	-1	8007500	-1	2048300	-1	1955200	-1	0	-1	1285500	-1	1	0	1	0	1	0	0.99	0	1	0	1	0	1	0	0.08	0	1	0	8	0	10	0	4	0	2	0
Phospho-2-dehydro-3-deoxyheptonate aldolase, tyrosine-inhibited OS=Saccharomyces cerevisiae (strain ATCC 204508 / S288c) OX=559292 GN=ARO4 PE=1 SV=2	P32449	ARO4	40 kDa		unknown	1769700	0	1677100	-1	5683200	-1	2923700	0	2204000	0	2222300	0	1902800	0	4245600	0	1721300	0	1	0	1	0	1	0	1	0	1	0	1	0	1	0	0.97	0	1	0	4	0	6	0	10	0	4	0
Delta(14)-sterol reductase OS=Saccharomyces cerevisiae (strain ATCC 204508 / S288c) OX=559292 GN=ERG24 PE=1 SV=1	P32462	ERG24	51 kDa		unknown	411190	-1	1309800	-1	1426600	-1	9012800	-1	3303500	0	2461700	0	3288700	0	10676000	-1	2194500	0	0.37	0	0.36	0	0.37	0	1	0	1	0	1	0	1	0	1	0	1	0	2	0	3	0	3	0	9	0
Protein SQS1 OS=Saccharomyces cerevisiae (strain ATCC 204508 / S288c) OX=559292 GN=SQS1 PE=1 SV=1	P53866	SQS1	87 kDa		unknown	393870	0	251820	0	136110	0	179210	0	861750	0	596000	0	668140	0	1009200	0	214030	0	1	0.59	0.99	0	0.96	0	1	0	1	0	1	0	1	0	1	0	0.96	0	5	0	3	0	1	0	4	0
ER-derived vesicles protein ERV41 OS=Saccharomyces cerevisiae (strain ATCC 204508 / S288c) OX=559292 GN=ERV41 PE=1 SV=1	Q04651	ERV41	41 kDa		unknown	1454100	0	1407900	0	1535100	0	957120	0	1434400	0	4037400	0	2721100	0	9526600	0	1490300	0	1	0	0.96	0	1	0	1	0	1	0	1	0	1	0	1	0	1	0	4	0	3	0	4	0	5	0
Protein WHI4 OS=Saccharomyces cerevisiae (strain ATCC 204508 / S288c) OX=559292 GN=WHI4 PE=1 SV=1	Q07655	WHI4	71 kDa		unknown	503610	0	570200	0	480500	0	1571100	0	1460100	0	1967400	0	1861000	-1	2260300	0	865420	0	1	0	0.96	0	1	0	1	0	1	0	1	0	1	0	1	0	1	0.07	4	0	3	0	3	0	5	0
RNA exonuclease 4 OS=Saccharomyces cerevisiae (strain ATCC 204508 / S288c) OX=559292 GN=REX4 PE=1 SV=1	Q08237	REX4	33 kDa		unknown	7521500	0	9554400	0	4090700	0	3662300	0	5254000	0	6481800	0	5284600	0	1962200	0	6742100	0	1	0	1	0	1	0	1	0	1	0	1	0	1	0	0.97	0	1	0	6	0	7	0	6	0	4	0
54S ribosomal protein L23, mitochondrial OS=Saccharomyces cerevisiae (strain ATCC 204508 / S288c) OX=559292 GN=MRPL23 PE=1 SV=1	Q12487	MRPL23	18 kDa		unknown	7075100	0	4280000	0	12459000	0	6911700	0	21880000	-1	7283100	0	2392300	0	6118900	0	3284600	0	1	0	1	0	1	0	1	0	1	0	1	0	1	0	1	0	1	0	7	0	4	0	6	0	4	0
Casein kinase I homolog HRR25 OS=Saccharomyces cerevisiae (strain ATCC 204508 / S288c) OX=559292 GN=HRR25 PE=1 SV=1	P29295	HRR25	57 kDa	TRUE	unknown	788660	0	971330	0	276770	0	782710	-1	187900	-1	705520	0	453860	0	874240	-1	732970	0	0.99	0	1	0	1	0	1	0	1	0	1	0	1	0	1	0	1	0	3	0	5	0	4	0	4	0
Bud emergence protein 1 OS=Saccharomyces cerevisiae (strain ATCC 204508 / S288c) OX=559292 GN=BEM1 PE=1 SV=1	P29366	BEM1	62 kDa		unknown	1063900	0	1315300	0	3265200	0	3150800	0	737670	0	3168200	0	585000	0	3115800	0	3692800	0	0.96	0.18	0.96	0	1	0	1	0	1	0	1	0	1	0	1	0	1	0	4	0	4	0	7	0	6	0
Cytochrome B pre-mRNA-processing protein 2 OS=Saccharomyces cerevisiae (strain ATCC 204508 / S288c) OX=559292 GN=CBP2 PE=1 SV=2	P03874	CBP2	74 kDa		unknown	0	0	293900	0	473740	0	1018300	0	701690	0	403980	0	970930	0	105720	0	1287000	0	0.96	0	1	0	1	0	1	0	1	0	1	0	1	0	1	0	1	0	1	0	2	0	2	0	6	0
Protein STE5 OS=Saccharomyces cerevisiae (strain ATCC 204508 / S288c) OX=559292 GN=STE5 PE=1 SV=2	P32917	STE5	103 kDa		unknown	2107900	0	385680	0	257680	0	718440	0	169500	0	605790	0	846990	0	559420	0	526960	0	1	0.17	1	0	1	0	1	0	1	0	1	0	1	0	1	0	1	0	5	0	2	0	1	0	6	0
Uncharacterized transporter YBR287W OS=Saccharomyces cerevisiae (strain ATCC 204508 / S288c) OX=559292 GN=YBR287W PE=1 SV=1	P38355	YBR287W	48 kDa		unknown	741470	0	2250300	0	4669100	0	7480300	-1	4059400	-1	6685800	0	2939900	0	0	0	9318400	0	1	0.72	1	0	1	0	1	0	1	0	1	0	1	0	0.43	0	1	0	3	0	3	0	6	0	7	0
Protein NSG1 OS=Saccharomyces cerevisiae (strain ATCC 204508 / S288c) OX=559292 GN=NSG1 PE=1 SV=1	P38837	NSG1	32 kDa		unknown	7452000	0	8077000	0	9629800	-1	12312000	-1	7027100	0	14999000	0	12626000	-1	14649000	-1	18589000	0	0.87	0	0.87	0	0.87	0	1	0	1	0	1	0	1	0	1	0	1	0	3	0	3	0	3	0	5	0
Reduced viability upon starvation protein 167 OS=Saccharomyces cerevisiae (strain ATCC 204508 / S288c) OX=559292 GN=RVS167 PE=1 SV=1	P39743	RVS167	53 kDa		unknown	78011	-1	620290	0	1034700	0	847030	0	8081200	0	7984300	0	3778600	0	997010	0	1195900	0	0.96	0	0.95	0	1	0	1	0	1	0	1	0	1	0	1	0	1	0	2	0	2	0	3	0	4	0
Protein BIM1 OS=Saccharomyces cerevisiae (strain ATCC 204508 / S288c) OX=559292 GN=BIM1 PE=1 SV=1	P40013	BIM1	38 kDa		unknown	48650	0	70685	0	68981	0	2015900	0	1336400	0	3929300	0	5442200	0	3224800	0	1506700	0	0.96	0	0.95	0	0.96	0	1	0	1	0	1	0	1	0	1	0	1	0	1	0	1	0	1	0	5	0
Fatty aldehyde dehydrogenase HFD1 OS=Saccharomyces cerevisiae (strain ATCC 204508 / S288c) OX=559292 GN=HFD1 PE=1 SV=1	Q04458	HFD1	60 kDa		unknown	609280	0	1208200	0	258740	0	0	0	3550800	0	1579700	0	692810	0	4771400	0	1753400	0	1	0	1	0.08	0.99	0	0	0.07	1	0	1	0	1	0	1	0	1	0	3	0	6	0	2	0	0	0
Pre-mRNA-splicing factor RSE1 OS=Saccharomyces cerevisiae (strain ATCC 204508 / S288c) OX=559292 GN=RSE1 PE=1 SV=1	Q04693	RSE1	154 kDa		unknown	114480	0	116550	0	176100	0	107540	0	26222	0	271410	0	476120	0	412730	0	595290	0	1	0.96	1	0.16	1	0.3	1	0	0.99	0	1	0	1	0	1	0	1	0	4	1	4	0	6	0	5	0
ABC transporter ATP-binding protein/permease PDR18 OS=Saccharomyces cerevisiae (strain ATCC 204508 / S288c) OX=559292 GN=PDR18 PE=1 SV=1	P53756	PDR18	150 kDa	TRUE	unknown	0	0	0	0	1000100	0	624010	0	2017400	5896600	3100200	0	567270	0	0	0	3506800	1664500	0	0	0	0	0.14	0	0.34	0	0.42	0.43	0.32	0	0.16	0	1	0	0.34	0.58	0	0	0	0	5	0	6	0
Nucleoporin NDC1 OS=Saccharomyces cerevisiae (strain ATCC 204508 / S288c) OX=559292 GN=NDC1 PE=1 SV=1	P32500	NDC1	74 kDa		unknown	819230	0	530610	0	262220	0	1737700	-1	1333100	0	608960	0	239340	0	1624000	0	2194600	0	1	0.13	1	0	1	0	1	0	1	0.14	1	0	1	0	1	0	1	0	4	0	5	0	2	0	9	0
Fumarate reductase 1 OS=Saccharomyces cerevisiae (strain ATCC 204508 / S288c) OX=559292 GN=FRD1 PE=1 SV=1	P32614	FRD1	51 kDa		unknown	95247	0	0	0	153080	0	757730	0	736070	0	713650	0	967160	0	849510	-1	2230400	0	0.35	0	0	0	1	0	1	0	1	0	1	0	1	0	1	0	1	0	2	0	0	0	4	0	4	0
Uncharacterized protein YEL043W OS=Saccharomyces cerevisiae (strain ATCC 204508 / S288c) OX=559292 GN=YEL043W PE=1 SV=1	P32618	YEL043W	106 kDa		unknown	0	0	0	0	0	0	294500	0	203710	0	2209400	0	627840	0	975030	0	478760	0	0.11	0	1	0.08	0.96	0.1	1	0	1	0	1	0	1	0	1	0	1	0	0	0	3	0	1	0	3	0
Protein KTI12 OS=Saccharomyces cerevisiae (strain ATCC 204508 / S288c) OX=559292 GN=KTI12 PE=1 SV=2	P34253	KTI12	35 kDa		unknown	313150	0	409120	-1	1968300	0	0	0	0	-1	5335700	0	481430	-1	9130400	0	7797100	0	0.96	0	0.96	0	1	0	0	0	0	0	1	0	0.96	0	1	0	1	0	2	0	1	0	4	0	0	0
Cytochrome b5 OS=Saccharomyces cerevisiae (strain ATCC 204508 / S288c) OX=559292 GN=CYB5 PE=1 SV=2	P40312	CYB5	13 kDa		unknown	28890000	-1	24292000	0	28278000	-1	81719000	-1	48307000	0	34475000	-1	36321000	-1	38724000	-1	22318000	-1	1	0	1	0	1	0	1	0	1	0.06	1	0	1	0	1	0	1	0	8	0	6	0	4	0	7	0
High-affinity methionine permease OS=Saccharomyces cerevisiae (strain ATCC 204508 / S288c) OX=559292 GN=MUP1 PE=1 SV=1	P50276	MUP1	63 kDa		unknown	2841500	0	2286200	-1	3681700	-1	6137600	-1	6347900	-1	6096000	0	4191500	-1	4586800	0	3974500	0	1	0	1	0	1	0	1	0	1	0	1	0	1	0	0.97	0	1	0	7	0	4	0	4	0	6	0
Topoisomerase 1-associated factor 1 OS=Saccharomyces cerevisiae (strain ATCC 204508 / S288c) OX=559292 GN=TOF1 PE=1 SV=1	P53840	TOF1	141 kDa		unknown	37668	22946000	0	0	81849	0	244730	0	223120	0	772680	0	324390	0	115120	0	303650	0	0.82	0.77	0	0	0.37	0	1	0	1	0.05	1	0	1	0	0.95	0	1	0	2	2	0	0	2	0	5	0
GTP-binding protein RHO3 OS=Saccharomyces cerevisiae (strain ATCC 204508 / S288c) OX=559292 GN=RHO3 PE=1 SV=2	Q00245	RHO3	25 kDa		unknown	0	0	162080	0	993270	0	3497200	0	1222100	0	1056500	-1	4569800	-1	5349300	-1	1786000	-1	0.38	0	0.95	0	0.96	0	1	0	1	0	1	0	1	0	1	0	1	0	1	0	1	0	3	0	8	0
Activator of C kinase protein 1 OS=Saccharomyces cerevisiae (strain ATCC 204508 / S288c) OX=559292 GN=ACK1 PE=1 SV=1	Q07622	ACK1	69 kDa		unknown	226060	0	0	0	82902	0	499830	0	16854000	0	10178000	0	647050	0	1791900	0	468170	0	0.9	0	0.97	0	0.99	0	1	0	1	0	1	0	1	0	1	0	1	0	2	0	2	0	2	0	3	0
1,3-beta-glucanosyltransferase GAS5 OS=Saccharomyces cerevisiae (strain ATCC 204508 / S288c) OX=559292 GN=GAS5 PE=1 SV=1	Q08193	GAS5	52 kDa		unknown	1054900	0	940860	0	241830	0	5846200	0	2327200	0	2598900	0	1035100	0	1862000	0	3270700	0	0.96	0	1	0.07	0.96	0.19	1	0	1	0.08	1	0	1	0.14	0.89	0.07	1	0.08	3	0	4	0	2	0	8	0
Mitogen-activated protein kinase SLT2/MPK1 OS=Saccharomyces cerevisiae (strain ATCC 204508 / S288c) OX=559292 GN=SLT2 PE=1 SV=2	Q00772	SLT2	56 kDa	TRUE	unknown	514490	0	317190	0	2929200	0	1622000	-1	4146600	0	2297200	0	347600	0	1464700	-1	3912800	0	0.88	0	0.86	0	1	0	1	0	1	0	1	0	1	0	1	0	1	0	3	0	3	0	5	0	4	0
Protein BOI2 OS=Saccharomyces cerevisiae (strain ATCC 204508 / S288c) OX=559292 GN=BOI2 PE=1 SV=1	P39969	BOI2	116 kDa	TRUE	unknown	594650	0	77252	0	421210	0	351530	0	184160	0	353600	0	230670	0	132580	0	201590	0	1	0.3	1	0	1	0	1	0.13	0.99	0	1	0.24	1	0	1	0.1	1	0	7	0	4	0	6	0	6	0
Ribonuclease P/MRP protein subunit POP5 OS=Saccharomyces cerevisiae (strain ATCC 204508 / S288c) OX=559292 GN=POP5 PE=1 SV=1	P28005	POP5	20 kDa		unknown	1329400	0	0	0	0	0	2038700	0	2641000	-1	1539800	-1	3144100	0	8027100	0	2960700	-1	1	0	0	0	0.96	0	1	0	1	0	1	0	1	0	1	0	1	0	4	0	0	0	1	0	6	0
SWI5-dependent HO expression protein 2 OS=Saccharomyces cerevisiae (strain ATCC 204508 / S288c) OX=559292 GN=SHE2 PE=1 SV=1	P36068	SHE2	28 kDa		unknown	13140000	-1	9455500	-1	0	0	762110	0	11253000	-1	8778600	0	4519700	-1	17557000	0	12232000	0	1	0	1	0	0	0	0.99	0	1	0	1	0	1	0	1	0	1	0	6	0	4	0	0	0	1	0
SEH-associated protein 4 OS=Saccharomyces cerevisiae (strain ATCC 204508 / S288c) OX=559292 GN=SEA4 PE=1 SV=2	P38164	SEA4	118 kDa		unknown	0	0	107750	0	391410	0	238640	0	242190	0	402040	0	391210	0	449950	0	0	0	0	0.11	1	0.12	1	0.13	1	0.34	1	0.14	1	0.73	1	0.05	1	0.28	1	0.72	0	0	4	0	6	0	3	0
Casein kinase II subunit beta' OS=Saccharomyces cerevisiae (strain ATCC 204508 / S288c) OX=559292 GN=CKB2 PE=1 SV=1	P38930	CKB2	30 kDa		unknown	3500700	0	4010200	-1	1226700	-1	1753800	-1	1732500	-1	3054900	0	1554400	0	6934600	0	5726200	-1	1	0.27	1	0	1	0	1	0	1	0	1	0	1	0	1	0	1	0	10	0	7	0	4	0	3	0
Elongator complex protein 2 OS=Saccharomyces cerevisiae (strain ATCC 204508 / S288c) OX=559292 GN=ELP2 PE=1 SV=1	P42935	ELP2	89 kDa		unknown	417090	0	324210	0	115910	0	418770	0	448580	0	764690	0	764080	0	308160	0	685610	0	1	0	1	0	0.96	0	1	0	1	0	1	0	1	0	1	0	1	0	6	0	5	0	2	0	4	0
37S ribosomal protein S26, mitochondrial OS=Saccharomyces cerevisiae (strain ATCC 204508 / S288c) OX=559292 GN=RSM26 PE=1 SV=1	P47141	RSM26	30 kDa		unknown	2646400	0	2952100	-1	5349700	-1	8392300	0	1451900	-1	5545500	-1	3473700	0	2251800	-1	4989700	-1	1	0.06	1	0	0.96	0	1	0	0.99	0	1	0	1	0	1	0	1	0	4	0	4	0	4	0	4	0
S-adenosylmethionine permease SAM3 OS=Saccharomyces cerevisiae (strain ATCC 204508 / S288c) OX=559292 GN=SAM3 PE=1 SV=1	Q08986	SAM3	64 kDa		unknown	3037600	0	4106700	-1	9262900	0	4686400	0	3650900	-1	9032200	0	4007000	0	4633200	0	5448800	0	1	0	1	0	1	0	1	0	1	0	1	0.06	1	0	0.97	0	1	0	5	0	6	0	7	0	7	0
Alpha N-terminal protein methyltransferase 1 OS=Saccharomyces cerevisiae (strain ATCC 204508 / S288c) OX=559292 GN=TAE1 PE=1 SV=1	P38340	TAE1	26 kDa		unknown	5991400	0	9222200	0	13321000	0	12829000	0	3372200	0	3996900	0	4046700	0	4036900	0	10426000	-1	1	0	1	0	1	0	1	0	0.95	0	0.96	0	1	0	1	0	1	0	8	0	6	0	8	0	8	0
Protein phosphatase 2C homolog 2 OS=Saccharomyces cerevisiae (strain ATCC 204508 / S288c) OX=559292 GN=PTC2 PE=1 SV=1	P39966	PTC2	50 kDa	TRUE	unknown	0	0	0	-1	1034800	0	1476900	-1	5649600	0	4260000	0	1783200	0	4236600	0	1851000	0	0	0.08	0	0	0.1	0	1	0	1	0	1	0	0.99	0	1	0	0.99	0	0	0	0	0	2	0	4	0
Origin recognition complex subunit 3 OS=Saccharomyces cerevisiae (strain ATCC 204508 / S288c) OX=559292 GN=ORC3 PE=1 SV=1	P54790	ORC3	72 kDa		unknown	384590	0	657720	0	864680	0	224710	0	409330	0	862830	-1	180450	0	1549300	0	634120	0	1	0	0.93	0.07	1	0	1	0	1	0	1	0	1	0	1	0	1	0	3	0	3	0	4	0	3	0
RNA polymerase-associated protein CTR9 OS=Saccharomyces cerevisiae (strain ATCC 204508 / S288c) OX=559292 GN=CTR9 PE=1 SV=3	P89105	CTR9	125 kDa		unknown	0	1286200000	26645	0	0	0	125820	1000600000	299270	0	292430	0	65976	0	178570	0	243530	0	0.96	0.81	0.99	0.11	0.85	0.12	1	0.83	1	0.06	1	0.25	1	0	1	0.14	1	0.22	1	2	2	0	0	0	2	1
Chromatin structure-remodeling complex subunit SFH1 OS=Saccharomyces cerevisiae (strain ATCC 204508 / S288c) OX=559292 GN=SFH1 PE=1 SV=1	Q06168	SFH1	49 kDa		unknown	3659000	-1	5687300	0	0	0	862010	-1	2565900	0	2544400	0	2845800	0	3379700	0	14918000	0	1	0	1	0	1	0	0.97	0	1	0	1	0	1	0	1	0	1	0	7	0	9	0	1	0	3	0
Bud site selection protein 21 OS=Saccharomyces cerevisiae (strain ATCC 204508 / S288c) OX=559292 GN=BUD21 PE=1 SV=1	Q08492	BUD21	24 kDa		unknown	1893100	0	1784100	0	1004400	-1	1380400	0	304480	276150000	3216400	19732000	753280	40332000	1510000	17500000	1878900	63155000	1	0	1	0	0.96	0	1	0	1	0.76	1	0.81	1	0.89	0.97	0.79	1	0.54	7	0	7	0	2	0	4	0
Serine/threonine-protein kinase PSK2 OS=Saccharomyces cerevisiae (strain ATCC 204508 / S288c) OX=559292 GN=PSK2 PE=1 SV=1	Q08217	PSK2	124 kDa	TRUE	unknown	81670	0	145120	0	69926	0	0	21904000	466850	0	283080	0	162470	0	697080	0	39052	0	0.99	0	0.99	0	1	0	1	0.11	1	0	1	0	0.99	0	1	0	1	0	1	0	2	0	1	0	1	2
Bifunctional purine biosynthetic protein ADE5,7 OS=Saccharomyces cerevisiae (strain ATCC 204508 / S288c) OX=559292 GN=ADE5,7 PE=1 SV=1	P07244	ADE5	86 kDa		unknown	0	0	55449	0	44042	0	393810	0	955720	0	916880	0	78551	6164900	139050	0	365090	0	0.96	0.05	0.96	0	1	0	1	0	1	0	1	0	1	0.79	1	0	1	0	1	0	2	0	4	0	3	0
Mitogen-activated protein kinase KSS1 OS=Saccharomyces cerevisiae (strain ATCC 204508 / S288c) OX=559292 GN=KSS1 PE=1 SV=1	P14681	KSS1	43 kDa	TRUE	unknown	0	-1	0	-1	598250	-1	613440	0	1026000	-1	2778700	0	2683100	0	4144200	0	1324100	0	0	0	1	0	0.96	0	0.99	0	1	0	1	0	1	0	1	0	1	0	0	0	1	0	3	0	2	0
Ubiquitin-activating enzyme E1 1 OS=Saccharomyces cerevisiae (strain ATCC 204508 / S288c) OX=559292 GN=UBA1 PE=1 SV=2	P22515	UBA1	114 kDa		unknown	147390	0	325870	0	294750	0	0	0	415490	0	678740	0	484760	0	314990	0	374610	0	0.98	0.15	1	0	1	0	1	0	1	0	1	0	1	0	1	0	1	0	2	0	2	0	5	0	2	0
Vacuolar import and degradation protein 27 OS=Saccharomyces cerevisiae (strain ATCC 204508 / S288c) OX=559292 GN=VID27 PE=1 SV=1	P40157	VID27	89 kDa		unknown	312650	0	632400	0	482100	0	1282100	0	398730	0	1108100	0	126030	0	591320	0	937580	0	1	0	1	0	1	0	1	0.11	1	0	1	0	1	0	1	0	1	0	3	0	5	0	5	0	9	0
37S ribosomal protein S16, mitochondrial OS=Saccharomyces cerevisiae (strain ATCC 204508 / S288c) OX=559292 GN=MRPS16 PE=1 SV=1	Q02608	MRPS16	14 kDa		unknown	11654000	-1	13015000	0	16836000	0	7932800	-1	7138900	0	4630300	-1	10645000	0	9808000	-1	7468100	0	1	0	1	0	1	0	1	0	0.96	0	1	0	1	0	1	0	1	0	6	0	6	0	6	0	3	0
Protein SLF1 OS=Saccharomyces cerevisiae (strain ATCC 204508 / S288c) OX=559292 GN=SLF1 PE=1 SV=1	Q12034	SLF1	51 kDa		unknown	122210	0	831650	0	942820	0	1916000	0	1308800	0	2044800	0	2300600	0	2262600	0	1949100	0	0.96	0	1	0	1	0.12	1	0	1	0	1	0	1	0	1	0.09	1	0.07	1	0	4	0	3	0	5	0
26S proteasome regulatory subunit RPN13 OS=Saccharomyces cerevisiae (strain ATCC 204508 / S288c) OX=559292 GN=RPN13 PE=1 SV=1	O13563	RPN13	18 kDa		unknown	4835400	0	8010500	-1	11128000	-1	15202000	0	23726000	0	29501000	-1	23644000	0	46081000	0	22913000	0	1	0	1	0	1	0	1	0	1	0	1	0	1	0	1	0	1	0	5	0	5	0	5	0	6	0
Cluster of Serine/threonine-protein kinase YPK1 OS=Saccharomyces cerevisiae (strain ATCC 204508 / S288c) OX=559292 GN=YPK1 PE=1 SV=2 (P12688)	P12688 [2]	YPK1	76 kDa	TRUE	unknown	0	0	0	0	1169300	0	0	0	0	0	149090	0	0	0	1382800	0	958520	0	0.89	0.11	0.95	0.09	1	0	1	0.08	1	0.45	1	0	1	0	1	0	1	0	1	0	2	0	8	0	4	0
2-oxoglutarate dehydrogenase, mitochondrial OS=Saccharomyces cerevisiae (strain ATCC 204508 / S288c) OX=559292 GN=KGD1 PE=1 SV=2	P20967	KGD1	114 kDa		unknown	98779	0	229480	0	367090	0	595000	0	699830	0	328060	0	202930	0	806620	0	903530	0	0.96	0.29	0.96	0.08	1	0	1	0.37	1	0	1	0	1	0	1	0	1	0	1	0	3	0	4	0	5	0
Mediator of RNA polymerase II transcription subunit 20 OS=Saccharomyces cerevisiae (strain ATCC 204508 / S288c) OX=559292 GN=SRB2 PE=1 SV=1	P34162	SRB2	23 kDa		unknown	1119500	0	2053700	0	0	0	2714300	0	0	0	1211300	0	3430900	0	4459400	0	3068800	0	1	0	1	0	1	0	1	0	0.95	0	1	0	1	0	1	0	1	0.07	3	0	4	0	1	0	4	0
Oligosaccharide translocation protein RFT1 OS=Saccharomyces cerevisiae (strain ATCC 204508 / S288c) OX=559292 GN=RFT1 PE=1 SV=1	P38206	RFT1	66 kDa		unknown	747470	0	1219700	0	1580200	-1	2239300	0	1435500	0	1197800	-1	1160000	0	3781900	0	1697500	0	1	0	1	0.46	1	0	1	0	1	0	1	0	1	0	1	0	1	0	5	0	6	1	5	0	5	0
tRNA (adenine(58)-N(1))-methyltransferase catalytic subunit TRM61 OS=Saccharomyces cerevisiae (strain ATCC 204508 / S288c) OX=559292 GN=GCD14 PE=1 SV=1	P46959	GCD14	44 kDa		unknown	0	0	2440000	0	2386400	0	803050	0	4344900	0	1515200	0	1808900	0	1420700	0	2712800	0	0	0	1	0	1	0	1	0	1	0	1	0	1	0	1	0	1	0.06	0	0	4	0	6	0	2	0
GPN-loop GTPase 3 OS=Saccharomyces cerevisiae (strain ATCC 204508 / S288c) OX=559292 GN=GPN3 PE=1 SV=1	Q06543	GPN3	31 kDa		unknown	4708100	0	1063200	0	0	0	7427500	0	0	0	15005000	0	7473800	0	13350000	0	22337000	0	1	0	0.96	0	0.96	0	1	0	0	0	1	0	1	0	1	0	1	0	6	0	2	0	1	0	4	0
Lysophospholipid acyltransferase OS=Saccharomyces cerevisiae (strain ATCC 204508 / S288c) OX=559292 GN=ALE1 PE=1 SV=1	Q08548	ALE1	72 kDa		unknown	0	0	1371200	0	1008600	0	3731900	0	1089100	0	4977800	0	788720	0	642490	0	1267400	0	0.96	0	1	0	1	0	1	0	1	0	1	0	1	0	1	0	1	0	2	0	7	0	4	0	8	0
Fimbrin OS=Saccharomyces cerevisiae (strain ATCC 204508 / S288c) OX=559292 GN=SAC6 PE=1 SV=1	P32599	SAC6	72 kDa		unknown	643930	0	647070	0	1065700	-1	749570	-1	304600	-1	0	0	365230	0	409060	0	518340	0	1	0	1	0	0.77	0	1	0	1	0	0.96	0	1	0	1	0	1	0	6	0	3	0	3	0	4	0
Condensin complex subunit 3 OS=Saccharomyces cerevisiae (strain ATCC 204508 / S288c) OX=559292 GN=YCG1 PE=1 SV=2	Q06680	YCG1	118 kDa		unknown	0	230230000	231970	98714000	0	5103100000	153390	1012300000	56320	279570000	80189	580090000	0	135760000	576160	73209000	52365	170910000	0.09	0.93	1	0.63	0.9	0.53	0.97	0.89	0.85	0.45	0.87	0.81	1	0.73	1	0.62	1	0.69	0	2	3	2	1	2	2	3
Pheromone alpha factor receptor OS=Saccharomyces cerevisiae (strain ATCC 204508 / S288c) OX=559292 GN=STE2 PE=1 SV=2	D6VTK4	STE2	48 kDa		unknown	4614400	0	6663800	-1	2932200	0	4631300	-1	4168900	0	0	0	6486000	1573500	-1	0	0	0	1	0	1	0	1	0	1	0	1	0	0	0	1	0.32	0	0	0	0	10	0	12	0	6	0	6	0
E3 ubiquitin-protein ligase PEP5 OS=Saccharomyces cerevisiae (strain ATCC 204508 / S288c) OX=559292 GN=PEP5 PE=1 SV=2	P12868	PEP5	117 kDa		unknown	177930	0	293590	0	148870	0	695810	0	163970	0	1002000	0	419330	0	775430	0	549710	0	1	0.63	1	0.06	0.92	0	1	0	0.93	0	1	0	1	0	1	0	1	0	4	0	4	0	1	0	5	0
Purine-cytosine permease FCY2 OS=Saccharomyces cerevisiae (strain ATCC 204508 / S288c) OX=559292 GN=FCY2 PE=1 SV=2	P17064	FCY2	58 kDa		unknown	6150500	0	3242400	0	3432100	-1	2207200	-1	6408500	-1	8519400	-1	3259200	-1	4185600	-1	4966500	0	1	0	1	0	1	0	0.97	0	1	0	1	0	1	0	1	0	1	0	4	0	7	0	6	0	2	0
Structural maintenance of chromosomes protein 1 OS=Saccharomyces cerevisiae (strain ATCC 204508 / S288c) OX=559292 GN=SMC1 PE=1 SV=1	P32908	SMC1	141 kDa		unknown	0	0	0	0	0	0	376180	0	15289	0	276920	0	368110	0	263320	0	434140	0	0.99	0.12	0.48	0	0.95	0	1	0.63	1	0	1	0	1	0	1	0	1	0.8	2	0	1	0	1	0	5	0
Methylenetetrahydrofolate reductase 1 OS=Saccharomyces cerevisiae (strain ATCC 204508 / S288c) OX=559292 GN=MET12 PE=1 SV=2	P46151	MET12	74 kDa		unknown	466910	0	453340	0	264940	0	320120	0	0	0	346390	0	1647400	-1	830220	0	573450	0	1	0	1	0	0.96	0	1	0	0.95	0	1	0	1	0	1	0	1	0	4	0	4	0	2	0	3	0
ATP-dependent RNA helicase MRH4, mitochondrial OS=Saccharomyces cerevisiae (strain ATCC 204508 / S288c) OX=559292 GN=MRH4 PE=1 SV=1	P53166	MRH4	63 kDa		unknown	580690	0	920030	0	1096200	0	509720	0	0	0	421120	0	392840	9716500	232210	0	421540	0	1	0	1	0	1	0	1	0.08	0	0	1	0.06	1	0.43	1	0.06	1	0	6	0	6	0	6	0	8	0
Histone deacetylase HDA1 OS=Saccharomyces cerevisiae (strain ATCC 204508 / S288c) OX=559292 GN=HDA1 PE=1 SV=1	P53973	HDA1	80 kDa		unknown	90146	0	116930	0	336590	0	120100	0	0	0	755460	0	113360	0	332440	0	476880	0	1	0	1	0	1	0	1	0	1	0	1	0	1	0	1	0	1	0	4	0	4	0	3	0	4	0
Origin recognition complex subunit 4 OS=Saccharomyces cerevisiae (strain ATCC 204508 / S288c) OX=559292 GN=ORC4 PE=1 SV=1	P54791	ORC4	61 kDa		unknown	314290	0	184540	0	67612	0	784090	0	847100	0	659020	0	287250	0	1616500	0	968150	0	0.96	0.09	1	0	1	0	1	0	1	0	1	0	1	0	1	0	1	0	3	0	2	0	2	0	6	0
Probable electron transfer flavoprotein-ubiquinone oxidoreductase, mitochondrial OS=Saccharomyces cerevisiae (strain ATCC 204508 / S288c) OX=559292 GN=CIR2 PE=1 SV=1	Q08822	CIR2	70 kDa		unknown	989380	0	1032100	0	977360	0	942270	0	1461200	0	984590	0	743680	0	1242800	0	993450	0	1	0	0.96	0	1	0	0.99	0	1	0	1	0	1	0	1	0	1	0	3	0	3	0	3	0	3	0
NAP1-binding protein 2 OS=Saccharomyces cerevisiae (strain ATCC 204508 / S288c) OX=559292 GN=NBP2 PE=1 SV=1	Q12163	NBP2	27 kDa		unknown	2308700	0	3875600	0	4408400	0	4204400	0	4929600	0	3858000	0	5172600	0	2173000	0	7266600	0	1	0	1	0	1	0	1	0	1	0	1	0	1	0	1	0	1	0	4	0	5	0	4	0	9	0
tRNA 2'-phosphotransferase OS=Saccharomyces cerevisiae (strain ATCC 204508 / S288c) OX=559292 GN=TPT1 PE=1 SV=1	Q12272	TPT1	26 kDa		unknown	2545000	0	1886500	0	1809300	0	3226300	0	876330	0	2000300	0	1277900	0	1170600	0	1107800	0	1	0	1	0	0.37	0	1	0	1	0	1	0	1	0	1	0	1	0	8	0	5	0	2	0	5	0
Branched-chain-amino-acid aminotransferase, cytosolic OS=Saccharomyces cerevisiae (strain ATCC 204508 / S288c) OX=559292 GN=BAT2 PE=1 SV=1	P47176	BAT2	42 kDa	TRUE	unknown	2278100	0	2635400	0	0	0	2320400	0	2732100	0	5160900	0	1095700	0	10281000	0	339460	0	1	0	0.99	0	0.06	0	0.97	0	1	0	1	0	1	0	1	0	0.98	0	7	0	5	0	0	0	3	0
Cluster of LAS seventeen-binding protein 3 OS=Saccharomyces cerevisiae (strain ATCC 204508 / S288c) OX=559292 GN=LSB3 PE=1 SV=3 (P43603)	P43603 [2]	LSB3	49 kDa	TRUE	unknown	313830	0	1075800	0	913520	-1	0	0	1427100	-1	475220	0	274450	0	1701700	0	245210	0	1	0	1	0	1	0	0.96	0	1	0.47	1	0	1	0	1	0	1	0	5	0	8	0	6	0	2	0
Chitin synthase 2 OS=Saccharomyces cerevisiae (strain ATCC 204508 / S288c) OX=559292 GN=CHS2 PE=1 SV=1	P14180	CHS2	110 kDa		unknown	158580	0	99634	0	444140	0	1041200	0	215960	0	782680	0	988490	0	621440	0	89635	0	0.96	0.06	0.96	0	1	0	1	0	1	0	1	0	1	0.36	1	0	1	0	2	0	1	0	4	0	7	0
SWI/SNF complex subunit SWI3 OS=Saccharomyces cerevisiae (strain ATCC 204508 / S288c) OX=559292 GN=SWI3 PE=1 SV=1	P32591	SWI3	93 kDa		unknown	344530	0	224840	0	252920	0	326690	0	280860	0	497670	0	377840	0	356870	0	234610	0	1	0	1	0	0.96	0	1	0	1	0	1	0	1	0	1	0	1	0	4	0	2	0	2	0	3	0
Serine/threonine-protein kinase TOR2 OS=Saccharomyces cerevisiae (strain ATCC 204508 / S288c) OX=559292 GN=TOR2 PE=1 SV=3	P32600	TOR2	282 kDa	TRUE	unknown	38099	0	7874.4	0	23145	0	69294	0	24789	0	129190	0	40792	0	6614.6	0	155130	0	1	0	0.95	0.32	0.69	0.07	1	0	1	0.08	1	0	1	0	1	0	1	0.15	6	0	1	0	1	0	4	0
Mitochondrial presequence protease OS=Saccharomyces cerevisiae (strain ATCC 204508 / S288c) OX=559292 GN=CYM1 PE=1 SV=2	P32898	CYM1	112 kDa		unknown	0	0	123930	0	67333	0	0	0	1347600	0	284810	0	321550	0	372150	0	93391	0	0.79	0.28	1	0	0.96	0	0.97	0.06	1	0	1	0	1	0	1	0	0.99	0	1	0	2	0	2	0	2	0
Dehydrodolichyl diphosphate synthase complex subunit RER2 OS=Saccharomyces cerevisiae (strain ATCC 204508 / S288c) OX=559292 GN=RER2 PE=1 SV=1	P35196	RER2	33 kDa		unknown	2765800	0	1266400	0	0	0	960980	0	2541500	0	3179400	0	2163100	-1	6107400	0	2584600	-1	1	0	0.96	0	0.99	0	1	0	1	0	1	0	1	0	1	0	1	0	7	0	2	0	1	0	1	0
Vacuolar ATPase assembly protein VMA22 OS=Saccharomyces cerevisiae (strain ATCC 204508 / S288c) OX=559292 GN=VMA22 PE=1 SV=1	P38784	VMA22	21 kDa		unknown	2251500	0	4392800	0	1999200	-1	22534000	0	121480	-1	186560	-1	375440	0	3407000	-1	1866900	-1	1	0	1	0	0.96	0	1	0	0.99	0	0.75	0	1	0	1	0	1	0	5	0	6	0	5	0	11	0
CAAX prenyl protease 1 OS=Saccharomyces cerevisiae (strain ATCC 204508 / S288c) OX=559292 GN=STE24 PE=1 SV=1	P47154	STE24	52 kDa		unknown	0	0	0	0	0	0	26319000	0	3241000	0	1959300	-1	1071800	0	4282500	0	905460	0	0	0	0	0	0.88	0	1	0	1	0	1	0	1	0	1	0	1	0	0	0	0	0	1	0	19	0
Nonsense-mediated mRNA decay protein 3 OS=Saccharomyces cerevisiae (strain ATCC 204508 / S288c) OX=559292 GN=UPF3 PE=1 SV=1	P48412	UPF3	45 kDa		unknown	244840	0	55680	0	0	0	0	0	653640	0	2587200	0	387710	0	1759900	0	954230	0	0.71	0	1	0	0	0	0.96	0	1	0	1	0	1	0	1	0	1	0	2	0	2	0	0	0	1	0
Valine amino-acid permease OS=Saccharomyces cerevisiae (strain ATCC 204508 / S288c) OX=559292 GN=BAP3 PE=1 SV=2	P41815	BAP3	67 kDa	TRUE	unknown	135520	0	153150	0	449370	0	314510	0	625180	0	674950	0	0	0	649040	0	386270	-1	1	0.14	1	0.05	0.99	0	0.75	0	0.79	0	1	0	0.44	0	0.99	0	1	0	3	0	4	0	4	0	4	0
Inorganic phosphate transporter PHO87 OS=Saccharomyces cerevisiae (strain ATCC 204508 / S288c) OX=559292 GN=PHO87 PE=1 SV=2	P25360	PHO87	103 kDa	TRUE	unknown	328620	0	892770	0	148710	0	310970	0	215490	0	2097600	0	587790	0	0	0	1291000	-1	0.97	0	0.93	0	0.45	0	0.97	0	0.43	0	1	0	1	0	0.97	0	1	0	5	0	6	0	4	0	4	0
CTP synthase 2 OS=Saccharomyces cerevisiae (strain ATCC 204508 / S288c) OX=559292 GN=URA8 PE=1 SV=4	P38627	URA8	65 kDa	TRUE	unknown	0	0	0	0	379810	0	506640	0	1202700	0	98227	0	0	0	171910	0	41860	0	0	0	0	0	0.66	0	1	0	1	0	0.96	0	0	0	0.96	0	0.99	0	0	0	0	0	8	0	7	0
Serine/threonine-protein kinase STE20 OS=Saccharomyces cerevisiae (strain ATCC 204508 / S288c) OX=559292 GN=STE20 PE=1 SV=1	Q03497	STE20	102 kDa	TRUE	unknown	874750	0	320640	0	39714	0	387360	0	29687	0	0	0	314710	1904000	359500	0	114040	0	1	0	1	0	0.97	0.26	1	0	1	0	1	0	1	0.86	1	0.15	1	0	8	0	3	0	1	0	6	0
WD repeat-containing protein JIP5 OS=Saccharomyces cerevisiae (strain ATCC 204508 / S288c) OX=559292 GN=JIP5 PE=1 SV=2	Q06214	JIP5	55 kDa		unknown	2591000	0	4776400	-1	3085900	0	1640200	0	4206100	0	2281000	0	0	0	0	0	0	0	1	0	1	0	1	0	1	0	1	0.06	1	0	1	0	0.97	0	0.08	0	6	0	8	0	5	0	3	0
Mitochondrial aspartate-glutamate transporter AGC1 OS=Saccharomyces cerevisiae (strain ATCC 204508 / S288c) OX=559292 GN=AGC1 PE=3 SV=1	Q12482	AGC1	104 kDa		unknown	0	0	53392	0	92076	0	458240	0	296540	0	464520	0	0	0	838540	0	516600	0	0	0.44	0.95	0.05	1	0.47	1	0	1	0.13	1	0	0.96	0	1	0	1	0	0	0	1	0	1	0	4	0
Inhibitory regulator protein IRA2 OS=Saccharomyces cerevisiae (strain ATCC 204508 / S288c) OX=559292 GN=IRA2 PE=1 SV=2	P19158	IRA2	352 kDa		unknown	0	0	0	0	29825	0	67973	0	179340	0	38279	7414000	265670	0	251520	0	27720	0	0.12	0.29	0.27	0.08	0.96	0	1	0	1	0.09	1	0.8	1	0	1	0	1	0.08	0	0	0	0	3	0	5	0
Flavoprotein-like protein YCP4 OS=Saccharomyces cerevisiae (strain ATCC 204508 / S288c) OX=559292 GN=YCP4 PE=1 SV=1	P25349	YCP4	26 kDa		unknown	121270	-1	0	0	0	0	36797000	0	1642400	0	1951000	0	3299900	0	2434300	0	2456900	0	0.77	0	0	0	0	0	0.98	0.06	1	0	1	0	1	0	1	0	1	0.11	2	0	0	0	0	0	1	0
Pre-mRNA-splicing factor SNU114 OS=Saccharomyces cerevisiae (strain ATCC 204508 / S288c) OX=559292 GN=SNU114 PE=1 SV=1	P36048	SNU114	114 kDa		unknown	0	0	0	0	161540	0	280180	0	629110	0	259560	0	115530	0	504680	0	215060	0	0.73	0.15	1	0	1	0.11	1	0.07	1	0	1	0	1	0	1	0	1	0	0	0	2	0	2	0	4	0
Lanosterol synthase OS=Saccharomyces cerevisiae (strain ATCC 204508 / S288c) OX=559292 GN=ERG7 PE=1 SV=6	P38604	ERG7	83 kDa		unknown	0	0	266420	0	174030	0	0	-1	977110	0	2167300	0	418910	0	1765200	0	1016500	-1	0	0	0.96	0	0.96	0	0	0	1	0	1	0	1	0	1	0	1	0	0	0	2	0	1	0	0	0
[truncated: 708 more rows]
[truncated: 10 more columns]
